# Supplementary material for: New anthropogenic land use estimates for the Holocene; HYDE 3.2
Source: Copernicus journal article supplement (doi:10.5194/essd-2016-58), 2016-12-07
Supplement: Supplementary file 1 [file Box S1.doc]

**Supplementary material**

**Calculation of the urban population density and the urban built-up area**

We have assumed that the form of the curve which describes the urban population density as a function of time, resembles a bell-shaped like curve (Gaussian probability density function), with a certain asymmetry and different asymptotic behavior in the past and future. (see Figure 2 article). It reflects the idea that the urban population density will increase in the beginning over time. After a certain point the urban population density will decrease, but slower and the urban population density will converge to a constant after a long time. This is expressed in the following form, which adapts and generalizes the Gaussian probability density functional form:

with:

Durb(t): the urban population density on time t (number of inhabitants per km2)

tmax: time when urban population density has reached its maximum

c: indicates how slow the second curve will decrease relatively to the first curve. c is greater than 1.

f1 and f2 are factors that determine the maximum height of the curve.

L: the minimum height of the first curve (left asymptote)

K: the minimum height of the second curve (right asymptote)

t: time

σ: determines the width of the bell curve.

We define Land K as a fraction of Dmax : L = b * Dmax  and K = d * Dmax

We used b = 0.2, c = 1.5 and d = 0.5 for each country.

To determine the shape of the curve for each country, we need two points on the curve. The first point is derived from an overlay of the Landscan population density maps and satellite imagery for the year 2000 and is noted as (t2000,D2000). The second point needed is the time and magnitude where the curve reaches is maximum (Dmax and tmax). We assume that this maximum is reached when the increase in urban population is slowing down for the first time in history.

Using the unknown point (tmax,Dmax) in both curves leads to the values of f1 and f2, which in fact guarantee that the left part (t<tmax) of the curve continuously connects to the right part (t>tmax) of the curve

f1 = Dmax – L and f2 = Dmax – K.

Using the known point (t2000,D2000) will give the value of σ:

For t2000 < tmax : σ=

For t2000 > tmax : σ =

Basic assumptions for these functions must be fulfilled to avoid a negative argument of the natural logaritme or square root:

1. D2000 must be greater than K for t2000 > tmax
2. D2000 must be greater than L for t2000 < tmax
3. D2000 must be smaller than Dmax.

**Determination of the point** (tmax,Dmax) **for a region.**

Given information for each region:

1. population numbers over time
2. urban population fraction over time
3. urban built-up area for the year 2000. From this the urban population density is determined and the point (t2000,D2000) is known.

The point (tmax,Dmax) is not known for each region.

To find the time tmax where the curve has reached is maximum Dmax we apply the following rules:

1. tmax has a default value of 2100. Most of the population scenarios are known to the year 2100.
2. The maximum Dmax is not reached when the urban population fraction is below 20%.
3. The maximum is reached in the year that the growth of the urban population starts to decrease. The growth of the urban population will be determined on a period of 10 years after 1700. Before 1700 we take a time period of 100 years. Two following time points must be smaller than the maximum Dmax, to set tmax.
4. It is important that (tmax,Dmax) is different from (t2000,D2000), otherwise the bell curve is not specified. We set tmax on 2005 when tmax is almost 2000 (1998, 1999, 2000, 2001, 2002)

For Dmax the following rules are applied:

1. Default value for Dmax is 0.1% percent of the total land area of the region. Between the year 1900 and 2000, we assume an increase of the default value of 0.001% a year till a maximum of 0.2% of the total land area of the region in the year 2000. After 2000 the default value for Dmax is 0.1% percent of the total land area of the region.
2. Maximum value for Dmax = 30000 cap/km2. This is a high value. Some cities have a maximum of 40000 cap/km2. We took a lower value because we only have regions which are mixed, some rural and some urban areas.
3. When tmax  is close to t2000 we assume that Dmax is close to D2000. To realize this we define that tmax  is close to t2000 when the difference abs(tmax-t2000) is smaller than 50 years. In that case the difference between Dmax and D2000 must be smaller than D2000 * a correction factor F. where F is calculated as 0.2 * abs(tmax-t2000)/50..When tmax and t2000 are not close, F will be given a value of 0.2.

The first three steps give a first estimate of Dmax, but there are more assumptions that must be fulfilled (see calculation of σ):

1. If K > D2000 then Dmax = (1.0 - F) * D2000 / d for t2000 > tmax
2. If L > D2000 then Dmax = (1.0 - F) * D2000 / b for t2000 < tmax
3. If Dmax < D2000 then Dmax = (1.0 + F) * D2000

Now we can calculate the urban built-up area for each point in time. For some countries, there occurs a temporary decrease of urban built-up area (Uarea(t)). We tried to avoid this phenomenon by performing a iterative method to adjust Dmax:

1. If Uarea(t-1) > Uarea(t) and Upop(t-1) < Upop(t) then Dmax is adjusted with an iterative method, in order to decrease the discrepancy between the rate of increase in urban population and the urban density (sometimes Uarea decreases which is not logical). Since Uarea(t) = Upop(t)/Udens(t), Dmax is decreased in each iteration step with 1% of the orginal difference between D2000 and Dmax, until the calculated built-up (Uarea(t)) does not decrease during the phase of continuous historical urban population increase.
2. For each time urban population density must be larger than 100 cap/km2. This avoids large urban built-up area in combination with a low urban population numbers.
