# Supplementary material for: New anthropogenic land use estimates for the Holocene; HYDE 3.2
Source: Copernicus journal article supplement (doi:10.5194/essd-2016-58), 2016-12-07
Supplement: Supplementary file 3 [file Table S1.doc]

Source description HYDE 3.2 Population and Land Use (by continent, and then countries in alphabetical order)

Note: ‘Populstat’ means data available on a sub-national level, otherwise it is on a national level (HYDE needs/uses sub-national data for allocation routines). All earliest used data points from literature are listed, before that date means that it is hind-casted by growth rates in case of population and per-capita estimates in case of land use (guestimates!) by HYDE 3.2. After the first listed year, it does not mean that yearly data are available (most often very irregular!).

Content:

**I Americas**

**II Africa**

**III Asia**

**IV Commonwealth of Independent States (CIS) = former USSR**

**V Europe**

**VI Middle East**

**I The Americas**

Anguila

Population

- UN World Population Prospects (2009) since 1950 – present
- Populstat since 1724 AD.

Land use

- FAOSTAT (FAO, 2008) since 1961 AD.

Antigua and Barbuda

Population

- UN World Population Prospects 1950 – present
- Populstat since 1834 AD.

Land use

- FAOSTAT since 1961 AD.

Argentina

Population

- UN World Population Prospects 1950 – present
- Populstat since 1869 AD.
- Mitchell (2007a) since 1870.
- Sanchez-Albornoz (1974) since 1850.
- Maddison (2001) since 1820
- McEvedy and Jones (1978) since 0 AD

Land use

- FAOSTAT since 1961 AD.
- Vasques-Presedo (1988), Total, Forage and Cropland area since 1900 AD.
- USDA-FAS, Total, Forage and Cropland since 1935 AD.
- Area of Cultivated Land from "Statistical yearbook of Argentina, vol. 11, 1995" for 1988 (1000 Hectares)
- Part of Argentinas Pampas, pers.comm. Ernesto Viglizzo, since 1881 AD.
- Subnational for cattle, 1960 and 1988

Aruba, see Netherlands Antilles

Bahamas

Population

- UN World Population Prospects 1950 – present
- Populstat since 1970 AD.
- McEvedy and Jones (1978) since 1700 AD

Land use

- FAOSTAT since 1961 AD.

Barbados

Population

- UN World Population Prospects 1950 – present
- Populstat since 1851 AD.
- McEvedy and Jones (1978) since 1700 AD.

Land use

- FAOSTAT since 1961 AD.

Belize

Population

- UN World Population Prospects 1950 – present
- Populstat since 1970 AD.

Land use

- FAOSTAT since 1961 AD.

Bermuda

Population

- UN World Population Prospects 1950 – present

Land use

- FAOSTAT since 1961 AD.

Bolivia

Population

- UN World Population Prospects 1950 – present
- Populstat since 1830 AD.
- Maddison (2001) since 1820
- McEvedy and Jones (1978) since 0 AD

Land use

- FAOSTAT since 1961 AD.

Brazil

Population

- UN World Population Prospects 1950 – present
- Populstat since 1776 AD.
- Maddison (2001) since 1820 AD
- McEvedy and Jones (1978) since 0 AD
- IBGE (IBGE, 1936) since 1776 AD
- Rosenblat (1945) since 1500 AD
- Bethell (1984) since 1780 AD
- Sanchez-Albornoz (1974) since 1850 AD

Land use

- FAOSTAT since 1961 AD.
- IBGE (1936) since 1920 AD
- FAO Yearbook (1947) since 1940 AD

Canada

Population

- UN World Population Prospects 1950 – present
- Populstat since 1851 AD.
- Mitchell (2007a) since 1870 AD.
- Maddison (2001) since 1820 AD
- McEvedy and Jones (1978) since 0 AD
- Denevan (1992) since

Land use

- FAOSTAT since 1961 AD.
- Urquhart and Buckley (1965) Historical statistics of Canada, Use of land in farms (series L7-14, p.352), since 1871 AD.
- STATCAN, Statistics Canada.

Cayman Isl.

Population

- UN World Population Prospects 1950 – present
- Populstat since 1921 AD.

Land use

- FAOSTAT since 1961 AD.

Chile

Population

- UN World Population Prospects 1950 – present
- Populstat since 1835 AD.
- Maddison (2001) since 1820 AD
- McEvedy and Jones (1978) since 0 AD

Land use

- FAOSTAT since 1961 AD.

Colombia

Population

- UN World Population Prospects 1950 – present
- Populstat since 1835 AD.
- Maddison (2001) since 1820 AD
- McEvedy and Jones (1978) since 0 AD
- Sanchez-Albornoz (1974) since 1850 AD
- Melo (1988) since 1500 AD
- Ocampo (1987) since 1500 AD
- Etter et al (2006) since 1500 AD

Land use

- FAOSTAT since 1961 AD.
- Ett*er et a*l. (2008) since 1500 AD

Costa Rica

Population

- UN World Population Prospects 1950 – present
- Populstat since 1801 AD.
- Maddison (2001) since 1820 AD
- McEvedy and Jones (1978) since 0 AD
- Sanchez-Albornoz (1974) since 1850 AD

Land use

- FAOSTAT since 1961 AD.

Cuba

Population

- UN World Population Prospects 1950 – present
- Populstat since 1899 AD.
- Maddison (2001) since 1820 AD
- McEvedy and Jones (1978) since 0 AD

Land use

- FAOSTAT since 1961 AD.

Dominica

Population

- UN World Population Prospects 1950 – present
- Populstat since 1801 AD.

Land use

- FAOSTAT since 1961 AD.

Dominican Republic

Population

- UN World Population Prospects 1950 – present
- Populstat since 1801 AD.
- Maddison (2001) since 1820 AD
- McEvedy and Jones (1978) since 0 AD
- Sanchez-Albornoz (1974) since 1850 AD

Land use

- FAOSTAT since 1961 AD.

Ecuador

Population

- UN World Population Prospects 1950 – present
- Populstat since 1856 AD.
- Maddison (2001) since 1820 AD
- McEvedy and Jones (1978) since 0 AD
- (Sanchez-Albornoz, 1974) since 1850 AD

Land use

- FAOSTAT since 1961 AD.

El Salvador

Population

- UN World Population Prospects 1950 – present
- Populstat since 1770 AD.
- Maddison (2001) since 1820 AD
- McEvedy and Jones (1978) since 0 AD

Land use

- FAOSTAT since 1961 AD.

Falklands Isl.

Population

- UN World Population Prospects 1950 – present

Land use

- FAOSTAT since 1961 AD.

French Guiana

Population

- UN World Population Prospects 1950 – present
- Populstat since 1936 AD.

Land use

- FAOSTAT since 1961 AD.

Grenada

Population

- UN World Population Prospects 1950 – present

Land use

- FAOSTAT since 1961 AD.

Guadeloupe

Population

- UN World Population Prospects 1950 – present

Land use

- FAOSTAT since 1961 AD.

Guatemala

Population

- UN World Population Prospects 1950 – present
- Populstat since 1852 AD.
- Maddison (2001) since 1820 AD
- McEvedy and Jones (1978) since 0 AD
- Sanchez-Albornoz (1974) since 1850 AD

Land use

- FAOSTAT since 1961 AD.

Guyana

Population

- UN World Population Prospects 1950 – present
- Populstat since 1901 AD.
- Maddison (2001) since 1820 AD
- McEvedy and Jones (1978) since 0 AD

Land use

- FAOSTAT since 1961 AD.

Haiti

Population

- UN World Population Prospects 1950 – present
- Populstat national since 1887 AD, subnational since 1901 AD.
- Maddison (2001) since 1820 AD
- McEvedy and Jones (1978) since 0 AD

Land use

- FAOSTAT since 1961 AD.

Honduras

Population

- UN World Population Prospects 1950 – present
- Populstat since 1881 AD.
- Maddison (2001) since 1820 AD
- McEvedy and Jones (1978) since 0 AD
- Sanchez-Albornoz (1974) since 1850 AD

Land use

- FAOSTAT since 1961 AD.

Jamaica

Population

- UN World Population Prospects 1950 – present
- Populstat since 1943 AD
- Maddison (2001) since 1820 AD
- McEvedy and Jones (1978) since 0 AD

Land use

- FAOSTAT since 1961 AD.

Martinique

Population

- UN World Population Prospects 1950 – present
- McEvedy and Jones (1978) since 1920 AD

Land use

- FAOSTAT since 1961 AD.

Mexico

Population

- UN World Population Prospects 1950 – present
- Populstat since 1850 AD
- Maddison (2001) since 1820 AD
- McEvedy and Jones (1978) since 0 AD
- Denevan (1992) since 1500 AD
- Livi-Bacci (2007)
- Mann (2005), cited Cook and Borah (19??)
- Williams (2003)

Land use

- FAOSTAT since 1961 AD.
- World Atlas of Agriculture (1969) since 1940 AD
- Lamartine Yates (1981) since 1930 AD

Montserrat

Population

- UN World Population Prospects 1950 – present

Land use

- FAOSTAT since 1961 AD.

Nehterlands Antilles

Population

- UN World Population Prospects 1950 – present

Land use

- FAOSTAT since 1961 AD.

Nicaragua

Population

- UN World Population Prospects 1950 – present
- Populstat since 1920 AD
- Maddison (2001) since 1820 AD
- McEvedy and Jones (1978) since 0 AD
- Sanchez-Albornoz (1974) since 1850 AD

Land use

- FAOSTAT since 1961 AD.

Panama

Population

- UN World Population Prospects 1950 – present
- Populstat since 1920 AD
- Maddison (2001) since 1820 AD
- McEvedy and Jones (1978) since 0 AD
- Sanchez-Albornoz (1974) since 1850 AD

Land use

- FAOSTAT since 1961 AD.

Paraguay

Population

- UN World Population Prospects 1950 – present
- Populstat since 1936 AD
- Maddison (2001) since 1820 AD
- McEvedy and Jones (1978) since 0 AD
- Sanchez-Albornoz (1974) since 1850 AD

Land use

- FAOSTAT since 1961 AD.

Peru

Population

- UN World Population Prospects 1950 – present
- Populstat since 1862 AD
- Maddison (2001) since 1820 AD
- McEvedy and Jones (1978) since 0 AD
- Sanchez-Albornoz (1974) since 1850 AD

Land use

- FAOSTAT since 1961 AD.

Puerto Rico

Population

- UN World Population Prospects 1950 – present
- Populstat since 1833 AD
- Maddison (2001) since 1820 AD
- McEvedy and Jones (1978) since 0 AD

Land use

- FAOSTAT since 1961 AD.

St. Kitss and Nevis

Population

- UN World Population Prospects 1950 – present
- Populstat since 1834 AD

Land use

- FAOSTAT since 1961 AD.

St. Lucia

Population

- UN World Population Prospects 1950 – present
- Populstat since 1992 AD

Land use

- FAOSTAT since 1961 AD.

St. Pierre and Miquelon

Population

- UN World Population Prospects 1950 – present
- Populstat since 1901 AD

Land use

- FAOSTAT since 1961 AD.

St. Vincent and Grenadines

Population

- UN World Population Prospects 1950 – present
- Populstat since 1994 AD

Land use

- FAOSTAT since 1961 AD.

Surinam

Population

- UN World Population Prospects 1950 – present
- Populstat since 1926 AD

Land use

- FAOSTAT since 1961 AD.

Trinidad and Tobago

Population

- UN World Population Prospects 1950 – present
- Populstat since 1815 AD

Land use

- FAOSTAT since 1961 AD.

Turks and Caicos Isl.

Population

- UN World Population Prospects 1950 – present
- Populstat since 1981 AD

Land use

- FAOSTAT since 1961 AD.

USA

Population

- UN World Population Prospects 1950 – present
- Populstat since 1790 AD
- US Bureau of Census Data (1976b) for the period 1790 - 1990 from : <http://www.census.gov/population/www/censusdata/pop-hc.html>
- Mitchell (1993a) since 1750 AD
- Maizel et al (1998) since1790 – 1992 AD

Land use

- FAOSTAT since 1961 AD.
- US Bureau of Census (1976a) since 1890 AD
- World Atlas of Agriculture (World Atlas of Agriculture, 1969) for the 40s and 50s
- Ramankutty and Foley (Ramankutty & Foley, 1999a, b) since 1700 and 1850 AD
- Maizel et al (1998) since1790 – 1992 AD

Uruguay

Population

- UN World Population Prospects 1950 – present
- Populstat since 1852 AD
- Maddison (2001) since 1820 AD
- McEvedy and Jones (1978) since 0 AD
- Sanchez-Albornoz (1974) since 1850 AD

Land use

- FAOSTAT since 1961 AD.

Venezuela

Population

- UN World Population Prospects 1950 – present
- Populstat since 1873 AD
- Maddison (2001) since 1820 AD
- McEvedy and Jones (1978) since 0 AD
- Sanchez-Albornoz (1974) since 1850 AD

Land use

- FAOSTAT since 1961 AD.

Virgin Isl. (British)

Population

- UN World Population Prospects 1950 – present
- Populstat since 1980 AD

Land use

- FAOSTAT since 1961 AD.

Virgin Isl. (U.S.)

Population

- UN World Population Prospects 1950 – present
- Populstat since 1990 AD

Land use

- FAOSTAT since 1961 AD.

**II Africa**

Algeria

Population

- UN World Population Prospects 1950 – present
- Populstat since 1966 AD
- Maddison (2001) since 0 AD
- McEvedy and Jones (1978) since 0 AD

Land use

- FAOSTAT since 1961 AD.

Angola

Population

- UN World Population Prospects 1950 – present
- Populstat since 1958 AD
- McEvedy and Jones (1978) since 800 AD

Land use

- FAOSTAT since 1961 AD.

Benin

Population

- UN World Population Prospects 1950 – present
- Populstat since 2003 AD

Land use

- FAOSTAT since 1961 AD.

Botswana

Population

- UN World Population Prospects 1950 – present
- Populstat since 1971 AD.
- Maddison (2001) since 0 AD
- McEvedy and Jones (1978) since 800 AD

Land use

- FAOSTAT since 1961 AD.

Burkina Faso

Population

- UN World Population Prospects 1950 – present
- Populstat since 1996 AD

Land use

- FAOSTAT since 1961 AD.

Burundi

Population

- UN World Population Prospects 1950 – present
- Populstat since 1979 AD.
- McEvedy and Jones (1978) since 0 AD

Land use

- FAOSTAT since 1961 AD.

Cameroon

Population

- UN World Population Prospects 1950 – present
- Populstat since 1976 AD

Land use

- FAOSTAT since 1961 AD.

Cape Verde

Population

- UN World Population Prospects 1950 – present
- Populstat since 2000 AD
- Russel (1958)
- McEvedy and Jones (1978) since 800 AD

Land use

- FAOSTAT since 1961 AD.

Central Africa Republic

Population

- UN World Population Prospects 1950 – present
- Populstat since 1960 AD

Land use

- FAOSTAT since 1961 AD.

Chad

Population

- UN World Population Prospects 1950 – present
- Populstat since 1958 AD
- McEvedy and Jones (1978) since 800 AD

Land use

- FAOSTAT since 1961 AD.

Comoren

Population

- UN World Population Prospects 1950 – present
- Populstat since 1952 AD
- McEvedy and Jones (1978) since 800 AD

Land use

- FAOSTAT since 1961 AD.

Congo Dem. Rep.

Population

- UN World Population Prospects 1950 – present
- Populstat since 1951 AD
- McEvedy and Jones (1978) since 800 AD

Land use

- FAOSTAT since 1961 AD.

Congo Rep.

Population

- UN World Population Prospects 1950 – present
- Populstat since 1974 AD
- McEvedy and Jones (1978) since 800 AD

Land use

- FAOSTAT since 1961 AD.

Djibouti

Population

- UN World Population Prospects 1950 – present
- Populstat since 1958 AD
- McEvedy and Jones (1978) since 800 AD

Land use

- FAOSTAT since 1976 AD.

Egypt

Population

- UN World Population Prospects 1950 – present
- Populstat since 1872 AD
- <http://www.tulane.edu/~august/H303/handouts/Population.htm>
- Whitmore et al. (1988)
- Russell (1958)
- Maddison (2001) since 0 AD
- McEvedy and Jones (1978) since 5000 BC

Land use

- FAOSTAT since 1961 AD.

Eq. guinea

Population

- UN World Population Prospects 1950 – present
- Populstat since 1910 AD
- McEvedy and Jones (1978) since 800 AD

Land use

- FAOSTAT since 1961 AD.

Eritrea

Population

- UN World Population Prospects 1950 – present
- Populstat since 1960 AD
- Maddison (2001) since 0 AD
- McEvedy and Jones (1978) since 800 AD

Land use

- FAOSTAT since 1961 AD.

Ethiopia

Population

- UN World Population Prospects 1950 – present
- Populstat since 1960 AD
- Maddison (2001) since 0 AD
- McEvedy and Jones (1978) since 800 AD

Land use

- FAOSTAT since 1961 AD.

Gabon

Population

- UN World Population Prospects 1950 – present
- Populstat since 1961 AD

Land use

- FAOSTAT since 1961 AD.

Ghana

Population

- UN World Population Prospects 1950 – present
- Populstat since 1901 AD

Land use

- FAOSTAT since 1961 AD.

Guinea

Population

- UN World Population Prospects 1950 – present
- Populstat since 1956 AD

Land use

- FAOSTAT since 1961 AD.

Guinea-Bissau

Population

- UN World Population Prospects 1950 – present
- Populstat since 1979 AD

Land use

- FAOSTAT since 1961 AD.

Ivory Coast

Population

- UN World Population Prospects 1950 – present
- Populstat since 1988 AD

Land use

- FAOSTAT since 1961 AD.

Kenya

Population

- UN World Population Prospects 1950 – present
- Populstat since 1969 AD
- McEvedy and Jones (1978) since 0 AD

Land use

- FAOSTAT since 1961 AD.

Lesotho

Population

- UN World Population Prospects 1950 – present
- Populstat since 1936 AD
- Maddison (2001) since 0 AD

Land use

- FAOSTAT since 1961 AD.

Liberia

Population

- UN World Population Prospects 1950 – present
- Populstat since 1962 AD

Land use

- FAOSTAT since 1961 AD.

Libya

Population

- UN World Population Prospects 1950 – present
- Populstat since 1890 AD
- Maddison (2001) since 0 AD
- McEvedy and Jones (1978) since 800 AD

Land use

- FAOSTAT since 1961 AD.

Madagascar

Population

- UN World Population Prospects 1950 – present
- Populstat since 1952 AD
- Maddison (2001) since 0 AD
- McEvedy and Jones (1978) since 800 AD

Land use

- FAOSTAT since 1961 AD.

Malawi

Population

- UN World Population Prospects 1950 – present
- Populstat since 1945 AD
- Maddison (2001) since 0 AD
- McEvedy and Jones (1978) since 800 AD

Land use

- FAOSTAT since 1961 AD.

Mali

Population

- UN World Population Prospects 1950 – present
- Populstat since 1964 AD
- McEvedy and Jones (1978) since 800 AD

Land use

- FAOSTAT since 1961 AD.

Mauritius

Population

- UN World Population Prospects 1950 – present
- Populstat since 1846 AD

Land use

- FAOSTAT since 1961 AD.

Mauritania

Population

- UN World Population Prospects 1950 – present
- Populstat since 1972 AD
- McEvedy and Jones (1978) since 800 AD

Land use

- FAOSTAT since 1961 AD.

Morocco

Population

- UN World Population Prospects 1950 – present
- Populstat since 1960 AD
- Maddison (2001) since 0 AD
- McEvedy and Jones (1978) since 800 AD

Land use

- FAOSTAT since 1961 AD.

Mozambique

Population

- UN World Population Prospects 1950 – present
- Populstat since 1930 AD
- Maddison (2001) since 0 AD
- McEvedy and Jones (1978) since 0 AD

Land use

- FAOSTAT since 1961 AD.

Namibia

Population

- UN World Population Prospects 1950 – present
- Populstat since 1970 AD
- Maddison (2001) since 0 AD
- McEvedy and Jones (1978) since 800 AD

Land use

- FAOSTAT since 1961 AD.

Niger

Population

- UN World Population Prospects 1950 – present
- Populstat since 1960 AD
- McEvedy and Jones (1978) since 800 AD

Land use

- FAOSTAT since 1961 AD.

Nigeria

Population

- UN World Population Prospects 1950 – present
- Populstat since 1963 AD
- McEvedy and Jones (1978) since 800 AD

Land use

- FAOSTAT since 1961 AD.

Reunion

Population

- UN World Population Prospects 1950 – present
- Populstat since 1646 AD

Land use

- FAOSTAT since 1961 AD.

Rwanda

Population

- UN World Population Prospects 1950 – present
- Populstat since 1970 AD
- McEvedy and Jones (1978) since 800 AD

Land use

- FAOSTAT since 1961 AD.

Saint Helena

Population

- UN World Population Prospects 1950 – present
- Populstat since 1871 AD

Land use

- FAOSTAT since 1961 AD.

Sao Tome and Principe

Population

- UN World Population Prospects 1950 – present
- Populstat since 1901 AD

Land use

- FAOSTAT since 1961 AD.

Senegal

Population

- UN World Population Prospects 1950 – present
- Populstat since 1948 AD
- Mbodj, M. and C. Becker (1989)b since 1900 AD
- McEvedy and Jones (1978) since 1920 AD

Land use

- FAOSTAT since 1961 AD.

Seychelles

Population

- UN World Population Prospects 1950 – present
- Populstat since 1931 AD

Land use

- FAOSTAT since 1961 AD.

Sierra Leone

Population

- UN World Population Prospects 1950 – present
- Populstat since 1956 AD

Land use

- FAOSTAT since 1961 AD.

Somalia

Population

- UN World Population Prospects 1950 – present
- Populstat since 1975 AD
- Maddison (2001) since 0 AD
- McEvedy and Jones (1978) since 3000 BC

Land use

- FAOSTAT since 1961 AD.

South Africa

Population

- UN World Population Prospects 1950 – present
- Populstat since 1834 AD
- Maddison (2001) since 0 AD
- McEvedy and Jones (1978) since 800 AD
- Feinstein (2005), 19th century

Land use

- FAOSTAT since 1961 AD.
- Biggs and Scholes (Biggs & Scholes, 2002) since 1911 AD

Sudan

Population

- UN World Population Prospects 1950 – present
- Populstat since 1937 AD
- Maddison (2001) since 0 AD
- McEvedy and Jones (1978) since 4000 BC

Land use

- FAOSTAT since 1961 AD.

Swaziland

Population

- UN World Population Prospects 1950 – present
- Populstat since 1938 AD
- Maddison (2001) since 0 AD
- McEvedy and Jones (1978) since 800 AD

Land use

- FAOSTAT since 1961 AD.

Tanzania

Population

- UN World Population Prospects 1950 – present
- Populstat since 1921 AD
- McEvedy and Jones (1978) since 1000 BC

Land use

- FAOSTAT since 1961 AD.

The Gambia

Population

- UN World Population Prospects 1950 – present
- Populstat since 1945 AD

Land use

- FAOSTAT since 1961 AD.

Togo

Population

- UN World Population Prospects 1950 – present
- Populstat since 1970 AD

Land use

- FAOSTAT since 1961 AD.

Tunesia

Population

- UN World Population Prospects 1950 – present
- Populstat since 1956 AD
- Maddison (2001) since 0 AD
- McEvedy and Jones (1978) since 800 AD

Land use

- FAOSTAT since 1961 AD.

Uganda

Population

- UN World Population Prospects 1950 – present
- Populstat since 1969 AD
- McEvedy and Jones (1978) since 800 AD

Land use

- FAOSTAT since 1961 AD.

Western Sahara

Population

- UN World Population Prospects 1950 – present
- Populstat since 1982 AD

Land use

- FAOSTAT since 1961 AD.

Zambia

Population

- UN World Population Prospects 1950 – present
- Populstat since 1956 AD
- Maddison (2001) since 0 AD
- McEvedy and Jones (1978) since 800 AD

Land use

- FAOSTAT since 1961 AD.

Zimbabwe

Population

- UN World Population Prospects 1950 – present
- Populstat since 1969 AD
- Maddison (2001) since 0 AD
- McEvedy and Jones (1978) since 800 AD

Land use

- FAOSTAT since 1961 AD.

**III Asia**

Afghanistan

Population

- UN World Population Prospects 1950 – present
- Populstat since 1965 AD
- Maddison (2001) since 1820 AD
- McEvedy and Jones (1978) since 5000 BC

Land use

- FAOSTAT since 1961 AD.

Australia

Population

- UN World Population Prospects 1950 – present
- Populstat since 1828 AD
- Lucas (2003) since 1850 AD
- McEvedy and Jones (1978) since 800 AD

Land use

- FAOSTAT since 1961 AD.
- Grigg (1987) since 1800 AD
- Australian Bureau of Census (Australian Bureau of Census) statewise since 1861 AD (several crops and livestock categories)

Bangladesh

Population

- UN World Population Prospects 1950 – present
- Populstat since 1991 AD
- Flint and Richards (1991), since 1880 AD
- McEvedy and Jones (1978) since 10 000 BC (India+Pakistan+Bangladesh)

Land use

- FAOSTAT since 1961 AD.
- Flint and Richards (1991), since 1880 AD

Bhutan

Population

- UN World Population Prospects 1950 – present
- Populstat since 1980 AD

Land use

- FAOSTAT since 1961 AD.

British Indian Ocean Territories

Population

- UN World Population Prospects 1950 – present
- Populstat since 1809 AD
- McEvedy and Jones (1978) since 800 AD

Land use

- FAOSTAT since 1961 AD.

Brunei Dar el Salaam

Population

- UN World Population Prospects 1950 – present
- Populstat since 1880 AD
- McEvedy and Jones (1978) since 800 AD

Land use

- FAOSTAT since 1961 AD.

Cambodia

Population

- UN World Population Prospects 1950 – present
- Populstat since 1936 AD
- Flint and Richards (1991), since 1880 AD
- Mitchell (1993b) since 1750 AD
- McEvedy and Jones (1978) since 800 AD
- Cambodia Census; http://www.phnompenh.gov.kh/history.htm

Land use

- FAOSTAT since 1961 AD.
- Flint and Richards (1991), since 1880 AD

China

Population

- UN World Population Prospects 1950 – present
- Populstat since 1787 AD
- Mitchell (2007c) since 1750 AD
- McEvedy and Jones (1978) since 0 AD
- Liu and Hwang (Liu & Hwang, 1979) since 1400 AD
- Chao (1996) since 0 AD
- Durand (Durand, 1974) since 1750 AD
- Heilig (1999) since 1750 AD

Land use

- FAOSTAT since 1961 AD.
- Cao or Chao ? since 0 AD ?
- Liu and Tian (Liu & Tian, 2010) since 1700 AD
- Ge (*Ge et a*l., 2008) since 1700 AD

Christmas Isl.

Population

- UN World Population Prospects 1950 – present
- Populstat since 1931 AD

Land use

- FAOSTAT since 1961 AD.

Cocos (Keeling) Isl..

Population

- UN World Population Prospects 1950 – present
- Populstat since 1976 AD

Land use

- FAOSTAT since 1961 AD.

Cook Isl.

Population

- UN World Population Prospects 1950 – present
- Populstat since 1945 AD

Land use

- FAOSTAT since 1961 AD.

East Timor.

Population

- UN World Population Prospects 1950 – present
- Populstat since 2002 AD

Land use

- FAOSTAT since 1961 AD.

Fr. Polynesia

Population

- UN World Population Prospects 1950 – present
- Populstat since 1902 AD

Land use

- FAOSTAT since 1961 AD.

Guam

Population

- UN World Population Prospects 1950 – present
- Populstat since 1990 AD

Land use

- FAOSTAT since 1961 AD.

Heard and McDonald Isl.

Population

- UN World Population Prospects 1950 – present

Land use

India

Population

- UN World Population Prospects 1950 – present
- Populstat since 1880 AD
- Flint and Richards (1991), since 1880 AD
- Mitchell (1993b) since 1750 AD
- Maddison (Maddison, 2001)
- McEvedy and Jones (1978) since 10 000 BC (India+Pakistan+Bangladesh)
- Clark (Clark, 1977) since 0 AD
- Census of India since 1900 AD
- Biraben (Biraben, 1980) 0 AD
- Durand (Durand, 1977) since 0 AD

Land use

- FAOSTAT since 1961 AD.
- Flint and Richards (1991), since 1880 AD
- Statistics India (2009) since 1950 AD, by province since 1990 AD

Indonesia

Population

- UN World Population Prospects 1950 – present
- Populstat since 1850 AD
- Flint and Richards (1991), since 1880 AD
- McEvedy and Jones (1978) since 0 AD

Land use

- FAOSTAT since 1961 AD.
- Flint and Richards (1991), since 1880 AD
- Ms. Rubeta (pers.comm) by state since 1993 AD
- Statistics Indonesia (BPS-Statistics Indonesia, 2009) since 1993 AD
- Ministry of Agriculture, oilpalm stats since 1990 AD

Japan

Population

- UN World Population Prospects 1950 – present
- Populstat since 1892 AD
- Maddison (2001) since 0 AD
- McEvedy and Jones (1978) since 0 AD
- Statistics Japan
- Hayami (1966) since 1600 AD

Land use

- FAOSTAT since 1961 AD.

Kiribati

Population

- UN World Population Prospects 1950 – present
- Populstat since 1980 AD

Land use

- FAOSTAT since 1961 AD.

Korea Rep.

Population

- UN World Population Prospects 1950 – present
- Populstat since 1966 AD
- Maddison (2001) since 1820 AD
- McEvedy and Jones (1978) since 0 AD

Land use

- FAOSTAT since 1961 AD.

Korea Dem. Rep.

Population

- UN World Population Prospects 1950 – present
- Populstat since 1966 AD
- Maddison (2001) since 1820 AD
- McEvedy and Jones (1978) since 0 AD

Land use

- FAOSTAT since 1961 AD.

Laos

Population

- UN World Population Prospects 1950 – present
- Populstat since 1970 AD
- Maddison (2001) since 1820 AD
- Flint and Richards (1991), since 1880 AD
- McEvedy and Jones (1978) since 0 AD

Land use

- FAOSTAT since 1961 AD.
- Flint and Richards (1991), since 1880 AD

Macau

- included in China

Malaysia.

Population

- UN World Population Prospects 1950 – present
- Populstat since 1901 AD
- Flint and Richards (1991), since 1880 AD
- Maddison (2001) since 1820 AD
- McEvedy and Jones (1978) since 0 AD

Land use

- FAOSTAT since 1961 AD.
- Flint and Richards (1991), since 1880 AD

Maldives

Population

- UN World Population Prospects 1950 – present
- Populstat since 2000 AD

Land use

- FAOSTAT since 1961 AD.

Marshall Isl.

Population

- UN World Population Prospects 1950 – present
- Populstat since 1988 AD

Land use

- FAOSTAT since 1961 AD.

Micronesia

Population

- UN World Population Prospects 1950 – present
- Populstat since 1935 AD

Land use

- FAOSTAT since 1961 AD.

Mongolia

Population

- UN World Population Prospects 1950 – present
- Populstat since 1961 AD
- Maddison (2001) since 1820 AD
- McEvedy and Jones (1978) since 0 AD

Land use

- FAOSTAT since 1961 AD.

Myanmar (Birma)

Population

- UN World Population Prospects 1950 – present
- Populstat since 1891 AD
- Maddison (2001) since 1820 AD
- Flint and Richards (1991), since 1880 AD
- McEvedy and Jones (1978) since 0 AD

Land use

- FAOSTAT since 1961 AD.
- Flint and Richards (1991), since 1880 AD

Nauru

Population

- UN World Population Prospects 1950 – present
- Populstat since 2003 AD

Land use

- FAOSTAT since 1961 AD.

New Zealand

Population

- UN World Population Prospects 1950 – present
- Populstat since 1886 AD
- McEvedy and Jones (1978) since 0 AD
- New Zealand census since 1880 AD

Land use

- FAOSTAT since 1961 AD.

Niue

Population

- UN World Population Prospects 1950 – present
- Populstat since 1991 AD

Land use

- FAOSTAT since 1961 AD.

Norfolk Isl.

Population

- UN World Population Prospects 1950 – present
- Populstat since 1996 AD

Land use

Northern Mariana Isl.

Population

- UN World Population Prospects 1950 – present
- Populstat since 1990 AD

Land use

- FAOSTAT since 1961 AD.

Pakistan

Population

- UN World Population Prospects 1950 – present
- Populstat since 1901 AD
- Census Pakistan since 1900 AD (<http://www.pap.org.pk/statistics/population.htm>)
- McEvedy and Jones (1978) since 0 AD

Land use

- FAOSTAT since 1961 AD.

Palau

Population

- UN World Population Prospects 1950 – present
- Populstat since 1990 AD

Land use

- FAOSTAT since 1961 AD.

Papua New Guinea

Population

- UN World Population Prospects 1950 – present
- Populstat since 1971 AD
- McEvedy and Jones (1978) since 0 AD

Land use

- FAOSTAT since 1961 AD.

Phillippines

Population

- UN World Population Prospects 1950 – present
- Populstat since 1980 AD
- Maddison (2001) since 1820 AD
- Flint and Richards (1991), since 1880 AD
- McEvedy and Jones (1978) since 0 AD

Land use

- FAOSTAT since 1961 AD.
- Flint and Richards (1991), since 1880 AD

Samoa (American)

Population

- UN World Population Prospects 1950 – present
- Populstat since 1940 AD

Land use

- FAOSTAT since 1961 AD.

Samoa (Western)

Population

- UN World Population Prospects 1950 – present
- Populstat since 1874 AD

Land use

- FAOSTAT since 1961 AD.

Singapore

Population

- UN World Population Prospects 1950 – present
- Populstat since 1920 AD
- Maddison (2001) since 1820 AD
- Flint and Richards (1991), since 1880 AD

Land use

- FAOSTAT since 1961 AD.
- Flint and Richards (1991), since 1880 AD

Solomon Isl.

Population

- UN World Population Prospects 1950 – present
- Populstat since 1931 AD

Land use

- FAOSTAT since 1961 AD.

Sri Lanka

Population

- UN World Population Prospects 1950 – present
- Populstat since 1981 AD
- Maddison (2001) since 1820 AD
- Flint and Richards (1991), since 1880 AD
- Statistics Sri Lanka since 2001 ?
- Mitchell (2007c) since 1920 AD

Land use

- FAOSTAT since 1961 AD.
- Flint and Richards (1991), since 1880 AD

Taiwan

Population

- UN World Population Prospects 1950 – present
- Populstat since 1966 AD
- Maddison (2001) since 1820 AD
- Mitchell (1998) since 1920 AD

Land use

- FAOSTAT since 1961 AD.

Thailand

Population

- UN World Population Prospects 1950 – present
- Populstat since 1947 AD
- Maddison (2001) since 1820 AD
- Mitchell (1998) since 1920 AD
- Flint and Richards (1991), since 1880 AD

Land use

- FAOSTAT since 1961 AD.
- Flint and Richards (1991), since 1880 AD

Tonga

Population

- UN World Population Prospects 1950 – present
- Populstat since 1986 AD

Land use

- FAOSTAT since 1961 AD.

Tokelau

Population

- UN World Population Prospects 1950 – present
- Populstat since 1968 AD

Land use

- FAOSTAT since 1961 AD.

Tuvalu

Population

- UN World Population Prospects 1950 – present
- Populstat since 1985 AD

Land use

- FAOSTAT since 1961 AD.

Vanuatu

Population

- UN World Population Prospects 1950 – present
- Populstat since 1989 AD

Land use

- FAOSTAT since 1961 AD.

Vietnam

Population

- UN World Population Prospects 1950 – present
- Populstat since 1992 AD, national estimates since 1901 AD
- Flint and Richards (1991), since 1880 AD
- Maddison (2001) since 1820 AD
- McEvedy and Jones (1978) since 0 AD

Land use

- FAOSTAT since 1961 AD.
- Flint and Richards (1991), since 1880 AD

Wallis and Futuna Isl.

Population

- UN World Population Prospects 1950 – present
- Populstat since 1900 AD

Land use

- FAOSTAT since 1961 AD.

**IV Commonwealth of Independent States (CIS)**

Armenia

Population

- UN World Population Prospects 1950 – present
- Populstat since 2000 AD
- Mitchell (2007b) since 1926 AD
- Historical Atlas (Tacitus) since 1930 AD
- McEvedy and Jones (1978) since 800 AD

Land use

- FAOSTAT since 1961 AD.

Azerbaijan

Population

- UN World Population Prospects 1950 – present
- Populstat since 1959 AD
- Historical Atlas (Tacitus) since 1930 AD
- McEvedy and Jones (1978) since 800 AD

Land use

- FAOSTAT since 1961 AD.

Belarus

Population

- UN World Population Prospects 1950 – present
- Populstat since 1959 AD
- Historical Atlas (Tacitus) since 1930 AD
- McEvedy and Jones (1978) since 0 AD (with fraction relative to Russia estimate)

Land use

- FAOSTAT since 1961 AD.

Georgia

Population

- UN World Population Prospects 1950 – present
- Populstat since 1993AD, national since 1926 AD
- Historical Atlas (Tacitus) since 1930 AD
- McEvedy and Jones (1978) since 800 AD

Land use

- FAOSTAT since 1961 AD.

Kazachstan

Population

- UN World Population Prospects 1950 – present
- Populstat since 1959 AD, national since 1867 AD
- Historical Atlas (Tacitus) since 1930 AD
- McEvedy and Jones (1978) since 800 AD

Land use

- FAOSTAT since 1961 AD.

Kyrgystan

Population

- UN World Population Prospects 1950 – present
- Populstat since 1979 AD, national since 1970 AD
- McEvedy and Jones (1978) since 800 AD

Land use

- FAOSTAT since 1961 AD.

Moldova

Population

- UN World Population Prospects 1950 – present
- Populstat since 1991 AD
- McEvedy and Jones (1978) since 0 AD (with fraction relative to Russia estimate)

Land use

- FAOSTAT since 1961 AD.

Russia

Population

- UN World Population Prospects 1950 – present
- Populstat since 1811 AD
- Maddison (2001) since 1700 AD
- Cippola (1994) since 1500 AD
- Russell (19??) since 1000 AD
- McEvedy and Jones (1978) since 0 AD (with fraction relative to Russia estimate)

Land use

- FAOSTAT since 1961 AD.

Tajikistan

Population

- UN World Population Prospects 1950 – present
- Populstat since 1989 AD
- McEvedy and Jones (1978) since 800 AD

Land use

- FAOSTAT since 1961 AD.

Turkmenistan

Population

- UN World Population Prospects 1950 – present
- Populstat since 1970 AD
- McEvedy and Jones (1978) since 800 AD

Land use

- FAOSTAT since 1961 AD.

Ukraine

Population

- UN World Population Prospects 1950 – present
- Populstat since 1959 AD, national since 1811 AD
- McEvedy and Jones (1978) since 0 AD (with fraction relative to Russia estimate)

Land use

- FAOSTAT since 1961 AD.

Uzbekistan

Population

- UN World Population Prospects 1950 – present
- Populstat since 1959 AD
- McEvedy and Jones (1978) since 800 AD

Land use

- FAOSTAT since 1961 AD.

**V Europe**

Albania

Population

- UN World Population Prospects 1950 – present
- Populstat since 1993 AD, national since 1930 AD
- Maddison (2001) since 0 AD
- McEvedy and Jones (1978) since 800 AD

Land use

- FAOSTAT since 1961 AD

Andorra

Population

- UN World Population Prospects 1950 – present
- Populstat since 1985 AD

Land use

- FAOSTAT since 1961 AD

Austria

Population

- UN World Population Prospects 1950 – present
- Populstat since 1527 AD
- Maddison (2001) since 0 AD
- McEvedy and Jones (1978) since 3000 BC

Land use

- FAOSTAT since 1961 AD

Belgium

Population

- UN World Population Prospects 1950 – present
- Populstat since 1801 AD
- Maddison (2001) since 0 AD
- McEvedy and Jones (1978) since 7000 BC

Land use

- FAOSTAT since 1961 AD

Bosnia-Herzegovina

Population

- UN World Population Prospects 1950 – present
- Populstat since 1961 AD
- Maddison (2001) since 0 AD

Land use

- FAOSTAT since 1961 AD

Bulgaria

Population

- UN World Population Prospects 1950 – present
- Populstat since 1987 AD, national since 1900 AD
- Maddison (2001) since 0 AD
- McEvedy and Jones (1978) since 0 AD

Land use

- FAOSTAT since 1961 AD

Croatia

Population

- UN World Population Prospects 1950 – present
- Populstat since 1991 AD
- Maddison (2001) since 0 AD

Land use

- FAOSTAT since 1961 AD

Cyprus

Population

- UN World Population Prospects 1950 – present
- Populstat since 1881 AD
- McEvedy and Jones (1978) since 3000 BC

Land use

- FAOSTAT since 1961 AD

Czech Rep.

Population

- UN World Population Prospects 1950 – present
- Populstat since 1957 AD, national since 1820 AD
- Maddison (2001) since 0 AD
- McEvedy and Jones (1978) since 800 AD

Land use

- FAOSTAT since 1961 AD

Denmark

Population

- UN World Population Prospects 1950 – present
- Populstat since 1970 AD, national since 1901 AD
- Maddison (2001) since 0 AD
- McEvedy and Jones (1978) since 0 AD
- Russell (1958) since 0 AD

Land use

- FAOSTAT since 1961 AD

Estonia

Population

- UN World Population Prospects 1950 – present
- Populstat since 1979 AD, national since 1934 AD

Land use

- FAOSTAT since 1961 AD

Faroer Isl.

Population

- UN World Population Prospects 1950 – present
- Populstat since 1989 AD
- McEvedy and Jones (1978) since 0 AD

Land use

- FAOSTAT since 1961 AD

Finland

Population

- UN World Population Prospects 1950 – present
- Populstat since 2002 AD, national since 1838 AD
- Maddison (2001) since 0 AD
- McEvedy and Jones (1978) since 0 AD
- Russell (1958) since 400 AD

Land use

- FAOSTAT since 1961 AD

France

Population

- UN World Population Prospects 1950 – present
- Populstat since 1801 AD
- Maddison (2001) since 0 AD
- McEvedy and Jones (1978) since 7000 BC
- Russell (1958) since 400 AD
- Cippola (1994) since 1000 AD
- De Vries (1984) since 1500 AD

Land use

- FAOSTAT since 1961 AD

Germany

Population

- UN World Population Prospects 1950 – present
- Populstat since 1946 AD
- Maddison (2001) since 0 AD
- McEvedy and Jones (1978) since 7000 BC
- Russell (1958) since 400 AD
- Cippola (1994) since 1000 AD
- De Vries (1984) since 1500 AD

Land use

- FAOSTAT since 1961 AD
- Bork et al (1998) since 600 AD

Gibraltar

Population

- UN World Population Prospects 1950 – present
- Populstat since 1970 AD

Land use

- FAOSTAT since 1961 AD

Greece

Population

- UN World Population Prospects 1950 – present
- Populstat since 1971 AD, national since 1951 AD
- Maddison (2001) since 0 AD
- McEvedy and Jones (1978) since 0 AD

Land use

- FAOSTAT since 1961 AD

Greenland

Population

- UN World Population Prospects 1950 – present
- Populstat since 1951 AD

Land use

- FAOSTAT since 1961 AD

Hungary

Population

- UN World Population Prospects 1950 – present
- Populstat since 1960 AD
- Maddison (2001) since 0 AD
- McEvedy and Jones (1978) since 3000 BC
- Russell (1958) since 500 AD
- Cippola (1994) since 1000 AD

Land use

- FAOSTAT since 1961 AD

Iceland

Population

- UN World Population Prospects 1950 – present
- Populstat since 1960 AD, a few since 1911 AD
- McEvedy and Jones (1978) since 800 AD

Land use

- FAOSTAT since 1961 AD

Ireland

Population

- UN World Population Prospects 1950 – present
- Populstat since 1841 AD, a few since 1911 AD
- McEvedy and Jones (1978) since 800 AD
- Maddison (2001) since 1700 AD
- Russell (1958) since 1300 AD
- De Vries (1984) since 1500 AD

Land use

- FAOSTAT since 1961 AD

Italy

Population

- UN World Population Prospects 1950 – present
- Populstat since 2000 AD, national since 1861 AD
- Maddison (2001) since 0 AD
- McEvedy and Jones (1978) since 0 AD
- Russell (1958) since 400 AD
- De Vries (1984) since 1500 AD

Land use

- FAOSTAT since 1961 AD

Latvia

Population

- UN World Population Prospects 1950 – present
- Populstat since 1979 AD, national since 1930 AD

Land use

- FAOSTAT since 1961 AD

Liechtenstein

Population

- UN World Population Prospects 1950 – present
- Populstat since 1980 AD

Land use

- FAOSTAT since 1961 AD

Lithuania

Population

- UN World Population Prospects 1950 – present
- Populstat since 1989 AD, national since 1923 AD

Land use

- FAOSTAT since 1961 AD

Luxembourg

Population

- UN World Population Prospects 1950 – present
- Populstat since 1995 AD, national since 1867 AD

Land use

- FAOSTAT since 1961 AD

Macedonia

Population

- UN World Population Prospects 1950 – present
- Populstat since 1980 AD
- Maddison (2001) since 0 AD

Land use

- FAOSTAT since 1961 AD

Malta

Population

- UN World Population Prospects 1950 – present
- Populstat since 1967 AD
- McEvedy and Jones (1978) since 1000 AD

Land use

- FAOSTAT since 1961 AD

Monaco

Population

- UN World Population Prospects 1950 – present
- Populstat since 1982 AD

Land use

- FAOSTAT since 1961 AD

Montenegro

Population

- UN World Population Prospects 1950 – present
- Populstat since 1948 AD

Land use

- FAOSTAT since 1961 AD

Netherlands

Population

- UN World Population Prospects 1950 – present
- Populstat since 1796 AD, national since 1600 AD
- De Vries (1984) since 1500 AD
- Russell (1958) since 400 AD
- Maddison (2001) since 0 AD
- McEvedy and Jones (1978) since 7000 BC
- Van Zanden (2009) since 6th century

Land use

- FAOSTAT since 1961 AD
- Centraal Bureau voor de Statistiek (2009) since 1900 AD

Norway

Population

- UN World Population Prospects 1950 – present
- Populstat since 1801 AD
- Russell (1958) since 400 AD
- Maddison (2001) since 0 AD
- McEvedy and Jones (1978) since 0 AD

Land use

- FAOSTAT since 1961 AD

Poland

Population

- UN World Population Prospects 1950 – present
- Populstat since 1999 AD, national since 1844 AD
- Cipolla (1994) since 1500 AD
- Maddison (2001) since 0 AD
- McEvedy and Jones (1978) since 7000 BC

Land use

- FAOSTAT since 1961 AD

Portugal

Population

- UN World Population Prospects 1950 – present
- Populstat since 1878 AD, national since 1838 AD
- Maddison (2001) since 0 AD
- McEvedy and Jones (1978) since 7000 BC

Land use

- FAOSTAT since 1961 AD

San Marino

Population

- UN World Population Prospects 1950 – present
- Populstat since 1993 AD

Land use

- included in Italy

Serbia

Population

- UN World Population Prospects 1950 – present
- Populstat since 1948 AD, national since 1844 AD
- Maddison (2001) since 0 AD
- McEvedy and Jones (1978) since 800 AD

Land use

- FAOSTAT since 1961 AD

Slovakia

Population

- UN World Population Prospects 1950 – present
- Populstat since 1996 AD, national since 1900 AD
- Maddison (2001) since 0 AD
- McEvedy and Jones (1978) since 800 AD

Land use

- FAOSTAT since 1961 AD

Slovenia

Population

- UN World Population Prospects 1950 – present
- Populstat since 1967 AD, national since 1957 AD
- Maddison (2001) since 0 AD
- McEvedy and Jones (1978) since 800 AD

Land use

- FAOSTAT since 1961 AD

Spain

Population

- UN World Population Prospects 1950 – present
- Populstat since 1833 AD
- Russell (1972) since 500 AD; <http://www.fordham.edu/halsall/source/pop-in-eur.html>
- Maddison (2001) since 0 AD
- McEvedy and Jones (1978) since 8000 BC

Land use

- FAOSTAT since 1961 AD

Svalbard and Jan Mayen Isl.

Population

- UN World Population Prospects 1950 – present
- Populstat since 2000 AD

Land use

- FAOSTAT since 1961 AD

Sweden

Population

- UN World Population Prospects 1950 – present
- Populstat since 1750 AD
- Maddison (2001) since 0 AD
- McEvedy and Jones (1978) since 0 AD
- Russell (1958) since 400 AD

Land use

- FAOSTAT since 1961 AD

Switserland

Population

- UN World Population Prospects 1950 – present
- Populstat since 1818 AD
- De Vries (1984) since 1500 AD
- Maddison (2001) since 0 AD
- McEvedy and Jones (1978) since 4000 BC

Land use

- FAOSTAT since 1961 AD

United Kingdom

Population

- UN World Population Prospects 1950 – present
- Populstat since 1801 AD
- De Vries (1984) since 1500 AD
- Historical Atlas (Tacitus) since 1500 AD
- (Fouquet & Pearson, 1998, 2006) since 1300 AD
- Maddison (2001) since 0 AD
- McEvedy and Jones (1978) since 800 AD

Land use

- FAOSTAT since 1961 AD
- Domesday Book (2003)for year 1086 AD
- Great Britain Historical Geographical Information System (GBHGIS),Farm Census has been taken annually since 1866. NOT USED / Available yet!

Vatican City

Population

- UN World Population Prospects 1950 – present

Land use

- n.a.

**VI Middle East**

Bahrein

Population

- UN World Population Prospects 1950 – present
- Populstat since 1991 AD, national since 1971 AD

Land use

- FAOSTAT since 1961 AD

Iran

Population

- UN World Population Prospects 1950 – present
- Populstat since 1966 AD
- Maddison (2001) since 0 AD
- McEvedy and Jones (1978) since 7000 BC

Land use

- FAOSTAT since 1961 AD

Iraq

Population

- UN World Population Prospects 1950 – present
- Populstat since 1920 AD
- Maddison (2001) since 1820 AD
- McEvedy and Jones (1978) since 7000 BC

Land use

- FAOSTAT since 1961 AD

Israel

Population

- UN World Population Prospects 1950 – present
- Populstat since 1970 AD, national since 1931 AD
- McEvedy and Jones (1978) since 800 AD

Land use

- FAOSTAT since 1961 AD

Jordan

Population

- UN World Population Prospects 1950 – present
- Populstat since 1994 AD, national since 1946 AD
- McEvedy and Jones (1978) since 800 AD

Land use

- FAOSTAT since 1961 AD

Kuwait

Population

- UN World Population Prospects 1950 – present
- Populstat since 1980 AD
- McEvedy and Jones (1978) since 800 AD

Land use

- FAOSTAT since 1961 AD

Lebanon

Population

- UN World Population Prospects 1950 – present
- Populstat since 1961 AD
- Maddison (2001) since 1820 AD
- McEvedy and Jones (1978) since 1000 BC

Land use

- FAOSTAT since 1961 AD

Occupied Palestinian Territory

Population

- UN World Population Prospects 1950 – present

Land use

- FAOSTAT since 1961 AD

Oman

Population

- UN World Population Prospects 1950 – present
- Populstat since 1993 AD
- Maddison (2001) since 1820 AD
- McEvedy and Jones (1978) since 800 AD

Land use

- FAOSTAT since 1961 AD

Qatar

Population

- UN World Population Prospects 1950 – present
- Populstat since 1986 AD

Land use

- FAOSTAT since 1961 AD

Saudi Arabia

Population

- UN World Population Prospects 1950 – present
- Populstat since 1992 AD
- Maddison (2001) since 1820 AD
- McEvedy and Jones (1978) since 0 AD

Land use

- FAOSTAT since 1961 AD

Syria

Population

- UN World Population Prospects 1950 – present
- Populstat since 1960 AD, national since 1923 AD
- Maddison (2001) since 1820 AD
- McEvedy and Jones (1978) since 1000 BC

Land use

- FAOSTAT since 1961 AD

Turkey

Population

- UN World Population Prospects 1950 – present
- Populstat since 1925 AD
- Maddison (2001) since 0 AD
- McEvedy and Jones (1978) since 6000 BC

Land use

- FAOSTAT since 1961 AD

United Arab Emirates

Population

- UN World Population Prospects 1950 – present
- Populstat since 1968 AD
- McEvedy and Jones (1978) since 800 AD

Land use

- FAOSTAT since 1961 AD

Yemen

Population

- UN World Population Prospects 1950 – present
- Populstat since 1988 AD
- Maddison (2001) since 1820 AD
- McEvedy and Jones (1978) since 0 AD

Land use

- FAOSTAT since 1961 AD

**References**
