# Supplementary material for: New anthropogenic land use estimates for the Holocene; HYDE 3.2
Source: Copernicus journal article supplement (doi:10.5194/essd-2016-58), 2016-12-07
Supplement: Supplementary file 5 [file Table S2.xlsx]

## Sheet: country
Percentage of Rice area that is irrigated														source:	http://ricepedia.org (visited 24 sept 2015)
								Share of rice area irrigated (1.00 = 100%)
																						indicators used to calibrate rest of countries to global ratio				check
IM22	ISO1	Country	-8000	1995	2000	2002	2005	2006	2007	2008	2009	2010
18	4	Afghanistan	1	1										http://ricepedia.org/index.php/afghanistan								irrigated	0.33	moet zijn :	0.59	0.585119
12	8	Albania	0.33	0.33																		rainfed	0.67	moet zijn :	0.41
7	12	Algeria	1	1	1	1	1	1	1	1	1	1
24	16	American Samoa	0.33	0.33
11	20	Andorra	0.33	0.33																		Dryland rice ecosystem (strictly rainfed)						source: http://www.fao.org/docrep/003/x2243t/x2243t05.htm
10	24	Angola	0.25	0.25
4	28	Antigua & Barb.	0.33	0.33																		Description. This is the most extensive rice ecosystem in Africa, so it has a great influence on the total rice output. It occurs in the uppermost part of the topo-sequence and is more important in West Africa than in other African regions. In West Africa it covers 57 percent (i.e. 1.8 million ha) of the total rice area
16	31	Azerbaijan	1	1	1	1	1	1	1	1	1	1										and accounts for 44 percent of regional production (Table 4). The major producers in West Africa include the following countries: Sierra Leone, Côte d'Ivoire, Liberia, Guinea-Bissau and Nigeria.
6	32	Argentina	0.06	0.06										http://ricepedia.org/index.php/argentina
24	36	Australia	0.33	0.33																		Irrigated ecosystem: humid zone						source: http://www.fao.org/docrep/003/x2243t/x2243t05.htm
11	40	Austria	1	1	1	1	1	1	1	1	1	1
4	44	Bahamas	0.33	0.33																		Description. The irrigated ecosystem provides the best conditions for rice cultivation because of the better control of water compared with other ecologies.
17	48	Bahrain	1	1	1	1	1	1	1	1	1	1										However, the importance of the irrigated ecosystem in rice production in Africa is relatively small (11 percent of the rice area) except in a few countries, such as Egypt (100 percent of the rice area), Madagascar
18	50	Bangladesh	0.295	0.295	0.319		0.43			0.73				http://ricepedia.org/index.php/bangladesh, in 2008: 73 % !!!								(31 percent), the Niger (100 percent) and Mauritania (100 percent) (WARDA, 1993). The yield range is the highest of all the ecosystems (from 3.5 to 7 tonnes/ha).
16	51	Armenia	1	1	1	1	1	1	1	1	1	1
4	52	Barbados	0.33	0.33																		East and Southern Africa			source: http://ricepedia.org/rice-around-the-world/africa
11	56	Belgium	1	1	1	1	1	1	1	1	1	1										Rainfed lowland = 60% of rice area
4	60	Bermuda	0.33	0.33																		Irrigated = 25 % of rice area
18	64	Bhutan	0.91	0.91								1		http://ricepedia.org/index.php/bhutan								rainfed upland = 15% of rice area
6	68	Bolivia	0.01	0.01										http://ricepedia.org/index.php/bolivia								irrigated	0.25
12	70	Bsnia.&Hrzgvna.	1	1	1	1	1	1	1	1	1	1										rainfed	0.75
10	72	Botswana	0.25	0.25
5	76	Brazil	0.5									0.5		http://ricepedia.org/index.php/brazil								http://ricepedia.org/rice-around-the-world/africa
4	84	Belize	0.33	0.33								0.5
18	86	British Indian Ocean Territory	0.33	0.33
24	90	Solomon Islands	0.33	0.33
4	92	Br.Virgin Is.	0.33	0.33
21	96	Brunei Dar El Salaam	0.33	0.33
12	100	Bulgaria	1	1	1	1	1	1	1	1	1	1
21	104	Myanmar	0.23					0.23						http://ricepedia.org/index.php/myanmar
9	108	Burundi	0.25		0.25									http://ricepedia.org/index.php/burundi
14	112	Belarus	1	1	1	1	1	1	1	1	1	1
21	116	Cambodia	0.15					0.15	0.17	0.2		0.25		http://ricepedia.org/index.php/cambodia
8	120	Cameroon	0.42								0.42			http://ricepedia.org/index.php/cameroon
1	124	Canada	1	1	1	1	1	1	1	1	1	1
8	132	Cape Verde	0.33	0.33
4	136	Cayman Islands	0.33	0.33
8	140	Central African Rep.	0.33	0.33
18	144	Sri Lanka	0.74					0.74						http://ricepedia.org/index.php/sri-lanka
8	148	Chad	0.1			0.1								http://ricepedia.org/index.php/republic-of-chad
6	152	Chile	0	0										http://ricepedia.org/index.php/chile: hardly any rice
20	156	China	0.93	0.93	0.93		1	1	1	1	1	1		http://ricepedia.org/index.php/china
20	158	Taiwan	0.33	0.33
24	162	Christmas Isl.	0.33	0.33
24	166	Cocos (Keeling) Isl.	0.33	0.33
6	170	Colombia	0.66		0.66		0.67					0.63		http://ricepedia.org/index.php/colombia
9	174	Comoros	0.33	0.33
9	175	Mayotte	0.5	0.5
8	178	Congo	0.33	0.33
8	180	Zaire	0.01	0.01				0.07				0.05		http://ricepedia.org/index.php/democratic-republic-of-congo
24	184	Cook Islands	0.33	0.33
4	188	Costa Rica	0.07					0.07						http://ricepedia.org/index.php/costa-rica
12	191	Croatia	0.33	0.33
4	192	Cuba	0.18	0.18										http://ricepedia.org/index.php/cuba
12	196	Cyprus	1	1	1	1	1	1	1	1	1	1
12	203	Czech Rep.	1	1	1	1	1	1	1	1	1	1
8	204	Benin	0.09							0.089				http://ricepedia.org/index.php/benin
11	208	Denmark	1	1	1	1	1	1	1	1	1	1
4	212	Dominica	0.33	0.33
4	214	Dominican Rep.	0.8					0.8						http://ricepedia.org/index.php/dominican-republic
6	218	Ecuador	0	0										http://ricepedia.org/index.php/ecuador: floodplains
4	222	El Salvador	0.33	0.33
8	226	Eq. Guinea	0.33	0.33
9	231	Ethiopia	0.25	0.25
9	232	Eritrea	0.25	0.25
12	233	Estonia	1	1	1	1	1	1	1	1	1	1
11	234	Faeroe Islands	0.33	0.33
6	238	Falkland Is.	0.33	0.33
24	242	Fiji	0.33	0.33
11	246	Finland	0.33	0.33
11	250	France	1	1	1	1	1	1	1	1	1	1		http://ricepedia.org/index.php/france
6	254	French Guiana	0.33	0.33
24	258	French Polynesia	0.33	0.33
9	262	Djibouti	1	1	1	1	1	1	1	1	1	1
8	266	Gabon	0.25	0.25
16	268	Georgia	1	1	1	1	1	1	1	1	1	1
8	270	Gambia	0	0
17	275	Occupied Palestinian Territory	1	1	1	1	1	1	1	1	1	1
11	276	Germany	1	1	1	1	1	1	1	1	1	1
8	288	Ghana	0.04		0.043									http://ricepedia.org/index.php/republic-of-ghana
11	292	Gibraltar	1	1	1	1	1	1	1	1	1	1
24	296	Kiribati	0.33	0.33
11	300	Greece	1	1	1	1	1	1	1	1	1	1		http://ricepedia.org/index.php/greece
25	304	Greenland	1	1	1	1	1	1	1	1	1	1
4	308	Grenada	0.33	0.33
4	312	Guadaloupe	0.33	0.33
24	316	Guam	0.33	0.33
4	320	Guatemala	0.33	0.33
8	324	Guinea	0.33	0.33										http://ricepedia.org/index.php/guinea : see Guinea-Bissau
6	328	Guyana	0.68							0.68				http://ricepedia.org/index.php/guyana
4	332	Haiti	0.33	0.33										http://ricepedia.org/index.php/haiti : n.a.
24	334	Heard and McDonald Isl.	0.33	0.33
11	336	Holy See	1	1	1	1	1	1	1	1	1	1
4	340	Honduras	0.33	0.33
20	344	Hong Kong	0.33	0.33
12	348	Hungary	1	1	1	1	1	1	1	1	1	1
11	352	Iceland	1	1	1	1	1	1	1	1	1	1
18	356	India	0.5	0.5	0.536		0.56	0.566	0.569	0.587				http://ricepedia.org/index.php/india
22	360	Indonesia	0.6		0.601		0.907							http://ricepedia.org/index.php/indonesia
17	364	Iran, Isl.Rep.of	1	1	1	1	1	1	1	1	1	1		http://ricepedia.org/index.php/iran
17	368	Iraq	1	1	1	1	1	1	1	1	1	1		http://ricepedia.org/index.php/iraq				assumed similar as Iran
11	372	Ireland	1	1	1	1	1	1	1	1	1	1
17	376	Israel	1	1	1	1	1	1	1	1	1	1
11	380	Italy	1	1	1	1	1	1	1	1	1	1		http://ricepedia.org/index.php/italy
8	384	Cote d'Ivoire	0.05							0.05				http://ricepedia.org/index.php/cote-d-ivoire
4	388	Jamaica	0.33	0.33
23	392	Japan	1	1	1	1	1	1	1	1	1	1		http://ricepedia.org/index.php/japan
15	398	Kazakhstan	1	1	1	1	1	1	1	1	1	1		http://ricepedia.org/index.php/kazakhstan
17	400	Jordan	1	1	1	1	1	1	1	1	1	1
9	404	Kenya	0.25	0.25
19	408	Dem.Rep.,Korea	1	1	1	1	1	1	1	1	1	1		http://ricepedia.org/index.php/democratic-people-s-republic-of-korea
19	410	Rep. of Korea	0.8					0.8				1		http://ricepedia.org/index.php/republic-of-korea
17	414	Kuwait	1	1	1	1	1	1	1	1	1	1
15	417	Kyrgyzstan	1	1	1	1	1	1	1	1	1	1
21	418	Lao	0.42				0.42							http://ricepedia.org/index.php/lao-people-s-democratic-republic
17	422	Lebanon	1	1	1	1	1	1	1	1	1	1
10	426	Lesotho	0.25	0.25
12	428	Latvia	1	1	1	1	1	1	1	1	1	1
8	430	Liberia	0	0										http://ricepedia.org/index.php/liberia: see Cote d'Ivoire
7	434	Libyan A.J.	1	1	1	1	1	1	1	1	1	1
11	438	Liechtenstein	1	1	1	1	1	1	1	1	1	1
12	440	Lithuania	0.33	0.33
11	442	Luxembourg	1	1	1	1	1	1	1	1	1	1
20	446	Macau	0.33	0.33
9	450	Madagascar	0.82		0.82					0.82	0.78
10	454	Malawi	0.15						0.15					http://ricepedia.org/index.php/malawi
21	458	Malaysia	0.56					0.563						http://ricepedia.org/index.php/malaysia
18	462	Maldives	0.33	0.33
8	466	Mali	0.42		0.415					0.9118				http://ricepedia.org/mali
12	470	Malta	1	1	1	1	1	1	1	1	1	1
4	474	Martinique	0.33	0.33
8	478	Mauritania	1	1	1	1	1	1	1	1	1	1		http://ricepedia.org/index.php/mauritania
9	480	Mauritius	0.33	0.33
3	484	Mexico	0.82	0.82										http://ricepedia.org/index.php/mexico
11	492	Monaco	1	1	1	1	1	1	1	1	1	1
20	496	Mongolia	0.33	0.33
14	498	Rep. of Moldova	0.33	0.33
4	500	Montserrat	0.33	0.33
7	504	Morocco	1	1	1	1	1	1	1	1	1	1
10	508	Mozambique	0.02		0.022				0.03					http://ricepedia.org/index.php/mozambique
17	512	Oman	1	1	1	1	1	1	1	1	1	1
10	516	Namibia	0.25	0.25
24	520	Nauru	0.33	0.33
18	524	Nepal	0.46					0.46						http://ricepedia.org/index.php/nepal
11	528	Netherlands	1	1	1	1	1	1	1	1	1	1
4	530	Neth.Antilles	0.33	0.33
4	533	Aruba	0.33	0.33
24	540	New Caledonia	0.33	0.33
24	548	Vanuatu	0.33	0.33
24	554	New Zealand	0.33	0.33
4	558	Nicaragua	0.23	0.23	0.34									http://ricepedia.org/index.php/nicaragua
8	562	Niger	1	1	1	1	1	1	1	1	1	1		http://ricepedia.org/index.php/niger				no share of irrigated given, so 100% (see text)
8	566	Nigeria	0.16	0.16	0.16					0.027	0.027			http://ricepedia.org/index.php/nigeria
24	570	Niue	0.33	0.33
24	574	Norfolk Isl.	0.33	0.33
11	578	Norway	1	1	1	1	1	1	1	1	1	1
24	580	Northern Mariana	0.33	0.33
24	583	Micr.,Fed.St.of	0.33	0.33
24	584	Marshall Islands	0.33	0.33
24	585	Palau	0.33	0.33
18	586	Pakistan	1	1	1	1	1	1	1	1	1	1		http://ricepedia.org/index.php/pakistan
4	591	Panama	0.16	0.16			1	1	1	1	1	1		http://ricepedia.org/index.php/panama
22	598	Papua New Guinea	0.33	0.33
6	600	Paraguay	0	0										http://ricepedia.org/index.php/paraguay: n.a. , as Uruguay
6	604	Peru	0.67	0.67										http://ricepedia.org/index.php/peru
21	608	Philippines	0.621	0.621	0.669		0.686	0.68	0.683	0.68	0.674	0.691		http://ricepedia.org/index.php/philippines
24	612	Pitcairn	0.33	0.33
12	616	Poland	1	1	1	1	1	1	1	1	1	1
11	620	Portugal	1	1	1	1	1	1	1	1	1	1		http://ricepedia.org/index.php/portugal
8	624	Guinea-Bissau	0.01	0.01	0.09									http://ricepedia.org/index.php/guinea-bissau: 1% in 1995, 9% in 2000 (I've taken the average)
21	626	East Timor	0.93									0.93		http://ricepedia.org/index.php/timor-leste
4	630	Puerto Rico	0.33	0.33
17	634	Qatar	1	1	1	1	1	1	1	1	1	1
9	638	Reunion	0.33	0.33
12	642	Romania	1	1	1	1	1	1	1	1	1	1
16	643	Russian Fed.	1	1	1	1	1	1	1	1	1	1		http://ricepedia.org/index.php/russian-federation
9	646	Rwanda	0.38							0.38				http://ricepedia.org/index.php/rwanda
8	654	St. Helena	0.33	0.33
4	659	St.Kitts & Nevis	0.33	0.33
4	660	Anguilla	0.33	0.33
4	662	Saint Lucia	0.33	0.33
2	666	St.Pierre & Miq.	0.33	0.33
4	670	St.Vin. & Gren.	0.33	0.33
11	674	San Marino	1	1	1	1	1	1	1	1	1	1
8	678	Sao Tome & Pr.	0.33	0.33
17	682	Saudi Arabia	1	1	1	1	1	1	1	1	1	1
8	686	Senegal	0.54							0.535	0.424	0.7		http://ricepedia.org/index.php/senegal
9	690	Seychelles	0.33	0.33
8	694	Sierra Leone	0.1	0.1										http://ricepedia.org/index.php/sierra-leone
21	702	Singapore	0.33	0.33
12	703	Slovakia	1	1	1	1	1	1	1	1	1	1
21	704	Viet Nam	0.64	0.64		0.85	0.934							http://ricepedia.org/index.php/vietnam, in 2005 93.4 % !!
12	705	Slovenia	1	1	1	1	1	1	1	1	1	1
9	706	Somalia	0.25	0.25
10	710	South Africa	0.25	0.25
10	716	Zimbabwe	0.25	0.25
11	724	Spain	1	1	1	1	1	1	1	1	1	1		http://ricepedia.org/index.php/spain
7	732	Western Sahara	1	1	1	1	1	1	1	1	1	1
9	736	Sudan	0.25	0.25
6	740	Suriname	0.98		0.984									http://ricepedia.org/index.php/suriname
11	744	Svalbard & Jan Mayen Isl.	1	1	1	1	1	1	1	1	1	1
10	748	Swaziland	0.25	0.25
11	752	Sweden	1	1	1	1	1	1	1	1	1	1
11	756	Switzerland	1	1	1	1	1	1	1	1	1	1
17	760	Syrian Arab Rep.	1	1	1	1	1	1	1	1	1	1
15	762	Tajikistan	1	1	1	1	1	1	1	1	1	1
21	764	Thailand	0.238	0.238	0.255		0.256		0.588					http://ricepedia.org/index.php/thailand, in 2007 58.8 %
8	768	Togo	0.3							0.3				http://ricepedia.org/index.php/togo
24	772	Tokelau	0.33	0.33
24	776	Tonga	0.33	0.33
4	780	Trin. & Tobago	0.33	0.33
17	784	U.Arab Emirates	1	1	1	1	1	1	1	1	1	1
7	788	Tunisia	1	1	1	1	1	1	1	1	1	1
13	792	Turkey	1	1	1	1	1	1	1	1	1	1		http://ricepedia.org/index.php/turkey
15	795	Turkmenistan	1	1	1	1	1	1	1	1	1	1		http://ricepedia.org/index.php/turkmenistan
4	796	Turks & Caicos	0.33	0.33
24	798	Tuvalu	0.33	0.33
9	800	Uganda	0.03		0.026					0.039				http://ricepedia.org/index.php/uganda
14	804	Ukraine	1	1	1	1	1	1	1	1	1	1		http://ricepedia.org/index.php/ukraine
12	807	TFYR Macedonia	1	1	1	1	1	1	1	1	1	1
7	818	Egypt	1	1	1	1	1	1	1	1	1	1		http://ricepedia.org/index.php/egypt
11	826	United Kingdom	1	1	1	1	1	1	1	1	1	1
10	834	U.R. Tanzania	0.16		0.1574					0.29	0.29			http://ricepedia.org/index.php/tanzania
2	840	United States	1	1	1	1	1	1	1	1	1	1		http://ricepedia.org/index.php/united-states
4	850	U.S. Virgin Is.	0.33	0.33
8	854	Burkina Faso	0.23								0.23			http://ricepedia.org/index.php/burkina-faso
6	858	Uruguay	0.93	0.93	1	1	1	1	1	1	1	1		http://ricepedia.org/index.php/uruguay
15	860	Uzbekistan	1	1	1	1	1	1	1	1	1	1		http://ricepedia.org/index.php/uzbekistan
6	862	Venezuela	0.98		0.984									http://ricepedia.org/index.php/venezuela: assumed similar as Surinam
24	876	Wallis & Futuna	0.33	0.33
24	882	Samoa, Western	0.33	0.33
17	887	Yemen	1	1	1	1	1	1	1	1	1	1
12	891	Union of Serbia and Montenegro	1	1	1	1	1	1	1	1	1	1
10	894	Zambia	0.25	0.25
		average		0.585119
		moet zijn:		0.59
