# Supplementary material for: New anthropogenic land use estimates for the Holocene; HYDE 3.2
Source: Copernicus journal article supplement (doi:10.5194/essd-2016-58), 2016-12-07
Supplement: Supplementary file 7 [file Table S3.xlsx]

## Sheet: Note
Total cropland estimate
Sheetname
data	= baseline (or best estimate) data
lower	= baseline data * first lower uncertainty ratio estimate
upper	= baseline data * first upper uncertainty ratio estimate
lower2	= baseline data * second lower uncertainty ratio estimate
upper2	= baseline data * upper lower uncertainty ratio estimate
2grid	= for export of baseline data to .csv file for computional grid
lower2grid	= for export of lower estimate to .csv file for computional grid
upper2grid	= for export of upper estimate to .csv file for computional grid
for paper	= HYDE 3.2 results and literature estimates

## Sheet: data
Total cropland estimate, in 1000 ha			2	initial ha crop/cal value					= based on sub-national data !
Arable land and Permanent crops			1	2	3	4	5	6	7	8	9	10	11	12	13	14	15	16	17	18	19	20	21	22	23	24	25	26	27	28	29	30	31	32	33	34	35	36	37	38	39	40	41	42	43	44	45	46	47
IM22	ISO1	Country	-10000	-9000	-8000	-7000	-6000	-5000	-4000	-3000	-2000	-1000	0	100	200	300	400	500	600	700	800	900	1000	1100	1200	1300	1400	1500	1600	1700	1710	1720	1730	1740	1750	1760	1770	1780	1790	1800	1810	1820	1830	1840	1850	1860	1870	1880	1890
18	4	Afghanistan	0	0	0	2.22435	3.07987	12.7933	156.718	825.169	1107.77	1332.56	2405.67	2673.54	2933.18	2894.79	2855.35	2814.78	2773.02	2648.06	2524.36	2428.34	2332.66	2415.26	2490.9	1706.04	1785.78	1857.66	2259.97	2194.24	2241.37	2285.15	2329.71	2375.07	2421.24	2468.23	2516.05	2564.72	2614.23	2664.62	2715.88	2768.02	2849.89	2997.63	3152.9	3316.1	3487.6	3722.4	4017.61
12	8	Albania	0	0	0	0	0	0	0	0	0	149.978	218.357	214.869	211.242	207.461	203.513	199.38	195.04	190.47	185.638	180.329	174.687	168.655	162.158	155.093	147.319	138.624	128.676	175.338	179.962	184.386	188.601	192.6	196.372	199.905	203.189	206.209	208.951	211.399	213.533	215.334	214.878	223.327	231.803	249.845	266.484	285.898	303.386
7	12	Algeria	0	0	0	0	47.9553	239.777	1198.88	1506.15	1439.65	1919.54	2399.42	2296.68	2197.1	2100.6	2007.08	1916.47	1828.7	1743.67	1661.32	1756.4	1843.12	1742.75	1645.16	1412.08	1190.97	1173.51	1697.62	1271.64	1323.41	1374.75	1425.65	1476.11	1526.14	1575.73	1624.88	1673.6	1721.89	1769.74	1817.15	1864.12	2178.71	2490.7	2800.08	3106.88	3411.07	3712.66	4011.66
24	16	American Samoa	0	0	0	0	0	0	0	0	0	0	0	0	0.00434697	0.0063954	0.00939787	0.0137913	0.0202074	0.0295559	0.04314	0.0628142	0.0911949	0.131929	0.190018	0.272144	0.386863	0.544277	0.754099	1.01898	1.05929	1.10066	1.14305	1.18639	1.23061	1.27561	1.32127	1.36745	1.41395	1.46057	1.50701	1.55726	1.60686	1.65528	1.70188	1.74586	1.90369	2.0691	2.23994
11	20	Andorra	0	0	0	0	0	0	0	0	0	0.748179	1.33462	1.3383	1.3407	1.34165	1.34098	1.33847	1.33388	1.3269	1.31719	1.30431	1.28771	1.26671	1.24043	1.20765	1.16668	1.11503	1.04864	0.96026	0.997703	1.03606	1.07526	1.11525	1.15594	1.19721	1.23892	1.28092	1.32298	1.36485	1.40623	1.44673	1.48588	1.52311	1.55769	1.5887	1.61497	1.63499	1.64672
10	24	Angola	0	0	0	0	0	0.317395	1.58697	7.93487	13.4568	22.8017	38.606	51.5537	68.8433	91.9308	122.76	163.927	218.897	292.299	390.312	508.157	626.346	731.81	837.577	943.645	1102.51	1261.83	1342.62	1423.64	676.256	685.782	695.864	706.561	717.944	730.092	743.103	757.088	772.185	788.559	806.412	825.997	847.631	871.723	898.811	929.616	965.136	1006.8	1056.76
4	28	Antigua & Barb.	0	0	0	0	0	0	0	0	0	0.571681	1.14458	1.24906	1.36312	1.48766	1.62364	1.77215	1.93435	2.11153	2.30513	2.51669	2.74795	3.00081	3.27735	3.57993	3.9111	4.27376	4.67108	5.10665	5.67247	6.30101	6.99923	7.77487	8.6365	9.59366	10.657	11.8382	13.1503	14.608	16.2274	18.0263	20.0248	20.9457	20.4709	18.4327	16.5109	15.044	14.4881
16	31	Azerbaijan	0	0	0	0	0	2.53925	8.88739	31.1059	37.9303	46.0129	55.5899	59.7574	64.2354	69.0467	74.216	79.7699	85.7369	92.1476	99.0347	104.989	110.976	166.964	223.282	279.927	224.597	281.561	338.846	396.448	258.366	279.976	303.393	328.769	356.267	386.065	418.355	453.345	491.262	532.351	576.875	625.124	677.408	734.064	795.459	861.989	934.082	1012.21	1096.86
6	32	Argentina	0	0	0	0	0	11.2871	12.8996	14.7424	16.8484	21.1074	24.1228	27.5689	31.5073	36.0084	41.1524	47.0313	53.7501	61.4287	70.2042	80.2334	91.6953	104.795	119.765	136.875	156.428	178.775	204.314	233.502	266.859	304.982	348.551	398.344	455.25	520.286	594.613	679.558	776.637	887.585	1014.38	1171.77	1339.16	1530.47	1750.07	2000.08	2302.87	2631.86	3007.83
24	36	Australia	0	0	0	0	0	0	0	0	0	0	0	0	0	0	0	0	0	0	0	0	0	0	0	0	0	0	0	0	0	0	0	0	0	0	0	0	7.15417	14.4313	20.106	26.5791	40.307	75.0716	195.804	475.313	874.214	1831.08	2172.09
11	40	Austria	0	0	0	0	0	0.444444	3.33333	20	60	100	500	550	600	550	500	450	400	450	500	600	700	900	1250	2000	1249.99	1999.76	2096.96	2083.42	2183.47	2279.48	2370.3	2454.46	2530.21	2584.42	2618.98	2639.1	2628.55	2551.42	2436.89	2420.12	2490.88	2449.72	2422.95	2415.97	2417.94	2461.4	2488.56
4	44	Bahamas	0	0	0	0	0	0	0	0	0	0	0	0.0234642	0.0255974	0.0279244	0.030463	0.0332323	0.0362535	0.0395492	0.0431446	0.0470668	0.0513457	0.0560134	0.0611056	0.0666606	0.0727207	0.0793317	0.0865436	0.0944112	0.103667	0.113831	0.124991	0.137245	0.1507	0.165474	0.181697	0.199511	0.219071	0.240548	0.264131	0.272936	0.282034	0.392115	0.481408	0.576219	0.748552	0.958362	1.21284
17	48	Bahrain	0	0	0	0	0	0	0	0	0	0	0	0	0	0	0	0	0	0	0	0	0	0	0	0	0	0	0	0	0	0	0	0	0	0	0	0	0	0	1.23134	1.27589	1.32119	1.36712	1.41353	1.46023	1.50895	1.5576	1.60587
18	50	Bangladesh	0	0	0	0	0	11.2804	56.4019	282.01	470.016	783.36	1305.6	1401.6	1497.6	1612.8	1728	1843.2	1958.4	2169.6	2380.8	2668.8	2956.8	3072	3187.2	3187.2	3609.59	3839.89	4990.22	6117.58	6272.63	6390.72	6508.23	6624.28	6737.75	6847.23	6950.92	7046.67	7131.86	7203.5	7258.21	7393.03	7505.6	7591.88	7648.76	7674.67	7737.03	7724.23	7907.35
16	51	Armenia	0	0	0	0	0.985518	3.44931	12.0726	42.2541	45.764	48.5114	49.4461	52.0806	54.8049	57.6124	60.4938	63.4368	66.4244	69.4346	72.438	74.4299	76.039	110.129	141.196	169.215	128.313	151.309	168.213	180.847	188.238	195.853	203.692	211.748	220.016	228.486	237.147	245.982	254.974	264.098	273.323	282.614	291.925	301.201	310.375	319.364	328.065	336.355	344.074
4	52	Barbados	0	0	0	0	0	0	0	0	0	0	0	0.00135447	0.00145305	0.00155743	0.00166766	0.00178373	0.0019055	0.00203272	0.00216495	0.00230149	0.00244132	0.00258299	0.00998959	0.038488	0.147583	0.562443	2.1259	7.94248	7.88185	7.82027	7.7577	7.69411	7.62945	7.56368	7.49674	7.42858	7.35915	7.28839	8.29865	9.28536	10.2477	11.1849	12.096	12.6385	13.1612	13.6631	14.1435
11	56	Belgium	0	0	0	0	0	0.422631	4.22631	25.3579	47.051	106.76	279.287	285.224	291.008	296.59	301.915	295.334	173.067	224.968	234.5	265.505	293.604	424.601	611.282	810.159	490.998	718.765	795.312	833.345	900.549	965.386	1027.75	1087.52	1144.57	1198.76	1249.92	1297.87	1342.41	1383.3	1420.28	1453.03	1539.47	1512.44	1574.89	1636.6	1682.22	1789.36	1920
4	60	Bermuda	0	0	0	0	0	0	0	0	0	0	0	0.0364602	0.0390989	0.0418895	0.044833	0.0479275	0.0511684	0.0545469	0.0580487	0.0616524	0.0653267	0.0690271	0.0726908	0.0762293	0.0795166	0.0823697	0.0845149	0.0855213	0.0942155	0.10377	0.114267	0.125794	0.138447	0.152331	0.167557	0.184247	0.202531	0.22255	0.244454	0.268405	0.294572	0.323137	0.35429	0.388232	0.42517	0.465315	0.508885
18	64	Bhutan	0	0	0	0	0	0	0	0	0	0	0	0.605836	0.82614	1.12655	1.53621	2.09483	2.85659	3.89535	5.31184	4.82895	4.38995	3.99087	3.62806	3.62806	3.59808	4.08872	4.95603	5.63185	6.4706	6.9357	7.4376	7.97929	8.56399	9.19521	9.87676	10.6128	11.4077	12.2663	13.1939	15.4457	17.1332	20.4026	21.7903	22.8446	24.5416	27.5463	28.568
6	68	Bolivia	0	0	0	0	0	29.5258	98.4194	328.065	338.832	342.8	334.176	350.361	367.016	384.101	401.557	419.311	437.265	455.292	473.232	506.632	536.618	571.473	601.461	625.91	643.935	654.316	546.076	505.226	510.296	515.291	520.202	525.017	529.724	534.309	538.759	543.058	547.189	551.133	554.87	650.551	762.355	761.623	760.332	894.446	757.226	623.541	999.879
12	70	Bsnia.&Hrzgvna.	0	0	0	0	0	3.95555	18.847	89.8005	132.598	191.812	267.43	266.97	266.524	265.831	264.863	263.591	261.98	259.987	257.564	254.653	251.181	257.161	261.62	264.337	265.02	263.267	302.493	280.385	294.615	303.934	313.472	323.227	333.195	343.372	353.753	364.329	375.092	386.031	397.133	416.146	435.872	456.31	477.453	499.289	545.168	594.856	648.587
10	72	Botswana	0	0	0	0	0	0	0	0	0	0	0	0	0	0	0	0	0	0	0	0	0	0	0	0	0	0	0	0	0	0	0	0	0	0	0	0	0	0	92.9652	95.2984	97.8775	100.752	103.986	107.668	111.918	116.909	122.902
5	76	Brazil	0	0	0	0	0	0	8.45924	16.9185	33.837	67.6739	135.348	144.637	154.564	165.173	176.509	188.624	201.57	215.405	230.189	234.27	238.403	264.111	289.818	315.526	341.234	393.641	104.472	136.565	148.326	161.225	175.267	190.717	207.893	226.816	247.895	271.509	298.13	328.361	406.501	499.224	633.968	769.588	906.239	1044.1	1183.6	1316.72	1635.61
4	84	Belize	0	0	0	0	0	0	0.382216	1.43331	1.66593	1.89711	2.08269	2.23538	2.39726	2.56849	2.74911	2.93904	3.13799	3.34544	3.56053	3.78196	4.00785	4.23549	4.4611	4.67932	4.88252	5.05967	5.19426	5.2604	5.64377	6.05375	6.49202	6.96031	7.46047	7.9944	8.56407	9.17152	9.81887	10.5083	11.2419	11.4816	11.7214	11.9608	12.1991	12.4354	13.7929	15.2889	16.9356
18	86	British Indian Ocean Territory	0	0	0	0	0	0	0	0	0	0	0	0	0	0	0	0	0	0	0	0	0	0	0	0	0	0	0	0	0	0	0	0	0	0	0	0	0	0	0	0	0	0	0	0	0	0	0
24	90	Solomon Islands	0	0	0	0	0	0	0	0	0	0	0	0.00542726	0.00800103	0.0117841	0.0173376	0.0254779	0.0373898	0.0547865	0.0801356	0.116972	0.170328	0.247302	0.357797	0.515391	0.738244	1.04964	1.47713	2.04741	2.53625	3.141	3.88893	4.81359	5.95632	7.36799	9.11115	11.2627	13.9168	17.1894	21.2221	22.1145	23.0326	23.9754	24.9416	25.9294	26.3989	26.8555	27.2956
4	92	Br.Virgin Is.	0	0	0	0	0	0	0	0	0	0	0	8.0337e-06	1.61163e-05	3.23298e-05	6.48527e-05	0.00013009	0.000260943	0.000523404	0.00104983	0.00210566	0.00422326	0.00847028	0.0169878	0.0340695	0.0683259	0.137023	0.274786	0.551043	0.596369	0.645424	0.698513	0.755968	0.81815	0.885446	0.958277	1.0371	1.1224	1.21473	1.31464	1.35882	1.40448	1.45168	1.50047	1.55089	1.60479	1.66056	1.71827
21	96	Brunei Dar El Salaam	0	0	0	0	0	0	0	0	0	0	0	0.121167	0.165228	0.225311	0.307242	0.418967	0.571318	0.77907	1.06237	0.965789	0.87799	0.957808	1.45122	1.45122	1.43923	1.09033	1.23901	1.35164	1.47536	1.6938	1.94547	2.23551	2.56985	2.95538	3.40005	3.91308	4.50512	5.18851	5.97755	6.77676	7.27974	8.39512	8.68297	8.81565	8.69739	8.96534	8.93827
12	100	Bulgaria	0	0	0	0	0	4.04774	22.2626	122.444	209.277	351.027	569.836	729.748	884.14	788.139	694.446	603.168	514.427	503.95	493.018	626.052	751.309	795.023	824.925	858.487	455.358	635.937	948.654	898.927	923.943	962.148	1001.82	1043.02	1085.77	1130.14	1176.18	1223.92	1273.43	1324.75	1377.93	1433.07	1467.62	1533.09	1601.18	1616.09	1630.38	1884.47	2143.14
21	104	Myanmar	0	0	0	0	0	1.43412	4.78041	15.9347	17.4231	193.789	375.617	413.148	450.678	488.208	525.737	563.267	600.796	638.327	675.857	713.389	750.921	938.635	1126.35	1088.79	1295.27	1501.75	1689.45	1877.15	1914.7	1952.24	1989.78	2027.32	2064.86	2102.41	2139.95	2177.49	2215.03	2252.57	2402.74	2552.91	2703.08	2853.25	3003.42	3341.31	3679.19	4016.94	4930.96
9	108	Burundi	0	0	0	0	0	0.112216	0.448862	1.79545	2.29727	2.92228	3.68864	5.33315	7.70998	11.1448	16.108	23.2786	33.637	48.598	70.2035	87.1404	103.821	125.393	146.621	167.495	188.008	208.151	227.088	245.649	249.41	252.138	255.026	258.091	261.352	264.833	268.561	272.567	276.889	281.574	286.678	292.271	298.44	305.3	312.996	321.726	331.76	343.485	357.476
14	112	Belarus	0	0	0	0	0	18.4492	64.5721	226.002	244.877	259.758	265.127	293.28	320.128	345.594	369.588	361.854	353.775	374.084	392.472	408.753	422.703	612.761	884.814	847.593	806.78	1015.14	1182.92	1442.9	1687.31	1808.47	1937.65	2075.27	2221.76	2377.55	2543.07	2718.75	2904.96	3102.08	3310.42	3530.25	3761.74	4004.95	4259.8	4526.02	4803.11	5090.23	5386.15
21	116	Cambodia	0	0	0	0	0	2.95808	13.0761	58.0266	81.0377	112.08	152.272	162.008	172.295	183.152	194.6	206.655	219.333	232.645	246.6	256.156	265.129	286.509	306.746	325.768	343.489	359.811	389.836	417.427	421.219	424.978	428.703	432.394	436.051	439.674	443.261	446.813	450.33	453.81	457.254	460.662	468.017	477.701	487.571	497.63	507.883	540.034	601.875
8	120	Cameroon	0	0	0	0	0	2.38152	10.7168	48.2257	75.0393	116.338	179.829	206.107	236.22	270.726	310.266	355.571	407.483	466.964	535.115	613.199	702.662	805.161	922.592	1057.13	1211.26	1387.84	1590.12	1821.86	1808.32	1826.27	1845.18	1865.14	1886.27	1908.69	1932.56	1958.06	1985.41	2014.86	2046.75	2081.45	2119.47	2161.42	2208.13	2260.67	2320.53	2389.81	2471.61
1	124	Canada	0	0	0	0	0	0	0	0	0	0	0	0	0	0	0	0	0	0	0	0	0	0	0	0	0	0	0	20.5032	26.552	34.4206	44.6666	58.021	75.4433	98.1935	127.928	220.272	297.921	434.376	593.86	815.682	1125.67	1563.05	2177.98	3540.64	4908.12	6088.28	7635.68
8	132	Cape Verde	0	0	0	0	0	0	0	0	0	0	0	0	0	0	0	0	0	0	0	0	0	0	0	0	0	0	2.28704	4.44634	4.74399	5.12394	5.53418	5.9771	6.45529	6.97153	7.52883	8.13045	8.77987	9.48087	10.2375	11.0542	11.9356	12.8869	13.9135	15.0214	16.217	17.507	18.899
4	136	Cayman Islands	0	0	0	0	0	0.000128831	0.000772985	0.00463791	0.00860548	0.0156207	0.492158	0.527621	0.565094	0.60458	0.646042	0.689405	0.73453	0.7812	0.829094	0.877749	0.926506	0.97444	1.02024	1.06203	1.09707	1.1212	1.12771	1.10471	1.17988	1.25951	1.34374	1.43273	1.52658	1.62537	1.72915	1.83789	1.95152	2.06985	2.19257	2.21498	2.23394	2.24878	2.25866	2.26259	2.26181	2.25218	2.23153
8	140	Central African Rep.	0	0	0	0	0	1.88336	8.47513	38.1381	59.4834	92.3965	143.046	151.028	159.45	168.338	177.717	187.613	198.056	209.074	220.701	232.968	245.911	259.568	273.977	289.179	305.218	322.14	339.993	358.828	360.122	365.547	371.292	377.393	383.89	390.829	398.267	406.27	414.918	424.308	434.557	445.815	458.269	472.159	487.802	505.625	526.219	550.436	579.556
18	144	Sri Lanka	0	0	0	0	0	4.12742	15.4778	58.0419	67.6842	77.4903	85.9427	98.8024	111.193	123.09	134.467	145.296	155.541	165.165	174.123	182.367	189.835	208.014	224.612	211.165	195.588	202.365	242.177	276.411	276.413	269.496	262.727	256.103	249.622	243.279	237.071	230.997	225.051	219.233	213.538	207.964	230.201	319.248	443.4	573.111	642.479	640.583	692.833
8	148	Chad	0	0	0	0	0	3.82053	15.2821	61.1285	84.4663	116.312	159.708	183.035	209.765	240.393	275.487	315.697	361.768	414.553	475.03	502.738	530.578	571.848	613.315	673.154	751.982	806.061	942.747	1080.09	1115.43	1124.61	1134.25	1144.42	1155.15	1166.51	1178.58	1191.45	1205.21	1219.99	1235.95	1253.26	1272.15	1292.94	1315.98	1341.8	1371.07	1404.76	1444.31
6	152	Chile	0	0	0	0	0	6.99963	22.1485	70.429	69.9049	127.539	224.606	237.091	250.071	263.532	277.446	291.777	306.474	321.464	336.654	351.577	364.751	389.26	410.739	428.803	442.958	452.545	428.103	401.841	409.35	416.928	424.57	432.272	440.026	447.827	455.668	463.539	471.433	479.339	487.246	532.965	582.796	637.082	779.459	968.822	1128.66	1297.53	1452.57
20	156	China	0	0	0	30.8218	125.558	468.699	1344.55	2995.23	5990.46	11980.9	23961.8	21675.8	18567.4	9611.16	13437.2	17024.2	23409.7	19824.4	15885.7	19628	18757.2	46734.4	54539.5	43429	39714.9	51859.7	56694.6	59284.6	61928.6	64857.7	66213.9	66884.6	68080.4	68864.6	69816.4	71728.9	74006.9	76150.7	79547.5	82098.3	83318.1	83817.6	84311.8	84640.3	84535.6	84955.2	87308.7
20	158	Taiwan	0	0	0	0	0	0.983477	3.93391	15.7356	19.4666	23.5614	27.3952	26.9233	26.4341	25.9262	25.3976	24.846	24.2688	23.6627	23.0238	22.3474	21.6274	25.0271	28.0317	30.5819	32.5959	33.9562	31.3451	141.034	158.424	164.584	170.891	177.337	183.907	190.589	197.361	204.201	211.08	217.963	224.806	231.556	232.55	234.638	236.267	236.991	236.803	236.062	234.08
24	162	Christmas Isl.	0	0	0	0	0	0	0	0	0	0	0	0	0	0	0	0	0	0	0	0	0	0	0	0	0	0	0	0	0	0	0	0	0	0	0	0	0	0	0	0	0	0	0	0	0	0	0
24	166	Cocos (Keeling) Isl.	0	0	0	0	0	0	0	0	0	0	0	0	0	0	0	0	0	0	0	0	0	0	0	0	0	0	0	0	0	0	0	0	0	0	0	0	0	0	0	0	0	0	0	0	0	0	0
6	170	Colombia	0	0	0	0	0	65.3495	245.06	918.977	1066.47	1211.35	1323.13	1386.33	1451.21	1517.58	1585.16	1653.6	1722.46	1791.14	1858.92	1986.6	2099.74	2298	2470.03	2611.94	2718.47	6000	4550	3482.68	3790	4105.64	4429.59	4761.85	5102.43	5451.32	5808.52	6174.03	6547.86	6930	5985	5106.33	5454.14	5803.73	6075	5967.86	5774.43	6193.48	6354.7
9	174	Comoros	0	0	0	0	0	0	0	0	0	0	0	0	0	0	0	0	0	0	0	2.11734	4.2263	5.06146	5.8932	6.72151	7.54637	8.36775	10.4382	12.5	12.4347	13.3201	14.2686	15.2846	16.3729	17.5388	18.7876	20.1254	21.5584	23.0935	24.7379	26.4993	28.3862	30.4074	32.5726	34.8919	37.3763	40.0376	42.8885
9	175	Mayotte	0	0	0	0	0	0	0	0	0	0	0	0	0	0	0	0	0	0	0	0	0	0	0	0	0	0	0	0	0	0	0	0	0	0	0	0	0	0	0	0	0	0	0	0	0	0	0
8	178	Congo	0	0	0	0	0	0.475117	1.90047	7.60187	10.1901	13.6583	18.3056	20.9314	23.9338	27.3669	31.2925	35.781	40.9134	46.782	53.4922	61.165	69.9382	79.9697	91.4401	104.556	119.552	136.7	156.307	178.726	179.633	181.304	183.064	184.922	186.889	188.977	191.201	193.576	196.124	198.868	201.838	205.071	208.611	212.518	216.866	221.755	227.323	233.763	241.36
8	180	Zaire	0	0	0	0	0	4.01905	15.5301	60.0725	76.8606	98.4195	126.125	164.191	214.028	279.343	365.03	477.548	625.431	819.956	1076.04	1209.38	1342.46	1564.69	1786.49	2007.85	2340.21	2671.91	2836.13	3000.01	3023.4	3042.6	3062.79	3084.06	3106.51	3130.28	3155.53	3182.41	3211.16	3242.02	3275.29	3311.35	3350.68	3393.86	3441.66	3495.09	3555.52	3624.88	3705.97
24	184	Cook Islands	0	0	0	0	0	0	0	0	0	0	0	0.00287486	0.0042904	0.00640244	0.00955339	0.0142539	0.0212653	0.0317227	0.0473183	0.0705743	0.10525	0.156946	0.23401	0.348875	0.520064	0.77516	1.15524	1.72147	1.81086	1.90489	2.00381	2.10786	2.21731	2.33244	2.45354	2.58092	2.71492	2.85587	3.00413	3.16887	3.34263	3.52592	3.71925	3.92317	4.05566	4.19261	4.33419
4	188	Costa Rica	0	0	0	0	0	2.66983	12.0142	54.064	75.3204	102.735	134.843	144.645	155.021	165.975	177.506	189.599	202.227	215.345	228.88	242.729	256.742	270.708	284.329	297.185	308.666	317.876	5.27071	13.7181	14.6911	15.728	16.8322	18.0073	19.2568	20.5842	21.9931	23.4867	25.0685	26.7413	29.4411	32.372	37.6229	44.2618	50.8387	57.252	71.0214	89.1247	106.268
12	191	Croatia	0	0	0	0	0	3.44636	18.2922	97.0896	159.45	256.279	396.005	395.008	393.999	392.585	390.723	388.36	385.436	381.878	377.6	372.498	366.442	373.956	378.922	380.918	379.365	373.429	423.404	384.244	388.32	399.401	410.619	421.953	433.378	444.867	456.388	467.9	479.36	490.713	501.899	522.596	543.559	564.677	585.809	606.78	655.463	706.559	759.743
4	192	Cuba	0	0	0	0	0	0	0	0	0	0	0	0.871099	1.0773	1.33184	1.6459	2.03319	2.51052	3.09846	3.82217	4.71233	5.80635	7.14973	8.79767	10.817	13.2884	16.3089	19.9947	24.484	28.3916	32.9225	38.176	44.267	51.3292	59.5173	69.0104	80.0166	92.7767	107.57	124.72	144.602	181.001	225.727	281.499	298.004	314.424	335.628	358.737
12	196	Cyprus	0	0	0	0.731452	3.65726	18.2863	91.4314	114.865	109.793	146.391	182.989	182.45	181.657	180.591	179.236	177.573	175.583	173.243	170.534	141.619	114.876	108.363	115.431	127.118	88.826	109.751	60.6409	50.8117	50.3341	49.8566	49.379	48.9014	48.4238	47.9462	47.4687	46.9911	46.5135	46.0359	48.8717	51.638	54.3348	56.9622	59.5201	65.4998	71.3328	77.019	82.5586
12	203	Czech Rep.	0	0	0	0	0	3.7113	22.2678	133.607	248.247	451.663	791.103	778.776	765.966	752.629	738.715	724.165	708.909	692.867	675.939	739.516	797.05	924.95	1188.18	1709.07	1357.49	1540.17	2159.56	1984.27	2019.26	2052.78	2084.77	2115.18	2143.93	2170.96	2196.21	2219.58	2240.99	2260.36	2277.56	2292.48	2645.25	2984.8	3079.38	3253.69	3443.84	3612.02	3738.77
8	204	Benin	0	0	0	0	0	1.70712	8.53562	42.6781	70.3551	115.938	190.977	217.999	248.843	284.049	324.236	370.106	422.463	482.226	550.44	628.3	717.17	818.607	934.388	1066.54	1198.35	1329.83	1372.42	1316.14	1214.74	1121.16	1034.79	955.065	881.486	813.576	750.898	693.048	639.655	590.375	544.892	510.771	478.787	448.806	420.701	394.357	402.354	410.513	418.837
11	208	Denmark	0	0	0	0	0	0	0	0	0	0.849584	62.7014	206.914	224.476	241.736	258.672	275.26	291.477	307.303	322.718	335.561	352.248	407.299	462.366	512.773	338.187	501.679	578.659	653.668	665.485	678.007	691.143	704.968	719.56	746.411	761.732	777.015	792.26	807.466	869.007	930.399	1024.23	1090.51	1203.18	1359.67	1511.78	1664.32	1832.46
4	212	Dominica	0	0	0	0	0	0	0	0	0	0	0	0.0646855	0.0794005	0.0973608	0.119243	0.14585	0.178123	0.217158	0.264211	0.320695	0.388146	0.468163	0.56226	0.67159	0.796429	0.935163	1.08224	1.22352	1.41051	1.62536	1.87204	2.15504	2.47944	2.85095	3.27594	3.76156	4.31571	4.94713	5.66537	6.48076	7.40435	8.44772	9.41564	10.9574	11.6412	11.5837	7.95833
4	214	Dominican Rep.	0	0	0	0	0	0	0.390134	1.463	1.74991	2.07904	2.44757	3.03923	3.77341	4.68428	5.81418	7.21553	8.95321	11.1075	13.7778	17.0869	21.1866	26.2649	32.5534	40.3386	49.974	61.8956	30.033	30.9814	32.2403	33.5504	34.9136	36.332	37.808	39.3438	40.9418	42.6047	44.3349	46.1353	48.0086	51.3853	54.9992	58.8671	63.0068	67.4375	88.4198	115.93	152.786
6	218	Ecuador	0	0	0	0	0	19.7627	65.8757	219.586	227.344	230.92	226.837	235.04	243.362	251.776	260.248	268.74	277.201	285.573	293.781	334.599	372.612	398.511	421.594	441.537	457.934	470.254	373.27	352.124	349.961	347.77	345.549	343.297	341.014	338.698	336.349	333.965	331.544	329.086	326.59	324.052	401.636	455.216	515.834	573.07	629.123	711.972	775.774
4	222	El Salvador	0	0	0	0	0	2.43597	8.11989	27.0663	27.9081	28.1571	27.2986	29.27	31.3541	33.5512	35.8598	38.2759	40.7925	43.3982	46.0761	48.8016	51.54	54.2421	56.8386	59.2305	61.2736	62.7508	63.3164	62.3695	62.303	62.3925	62.7015	63.3195	64.3732	66.0428	68.5856	79.295	89.564	99.3673	108.677	117.46	133.176	147.943	161.685	184.49	205.487	238.336	267.992
8	226	Eq. Guinea	0	0	0	0	0	1.08168	4.0563	15.2111	17.8708	20.6989	23.4348	25.735	28.2488	30.994	33.989	37.2534	40.8076	44.6724	48.8693	54.0875	59.074	58.0142	56.9141	83.6547	95.5089	106.657	110.541	113.942	114.194	114.443	114.72	115.029	115.374	115.76	116.192	116.679	117.23	117.857	118.574	119.401	120.366	121.506	122.875	124.556	126.686	129.509	133.532
9	231	Ethiopia	0	0	0	0	0	4.77828	20.0688	84.2889	117.676	164.284	229.347	280.347	342.688	418.89	512.038	625.899	765.079	935.207	1143.17	1142.84	1142.51	1142.18	1141.86	1141.53	1141.2	1140.87	1140.54	1140.21	1165.03	1189.86	1214.68	1239.49	1264.31	1289.13	1313.94	1338.75	1363.57	1388.38	1413.18	1437.99	2013.62	2589.22	3164.79	3740.32	4315.82	4891.28	5466.71
9	232	Eritrea	0	0	0	0	0	0.471864	1.76949	6.63559	8.14189	9.97917	12.216	13.1272	14.1063	15.1581	16.2881	17.5021	18.8063	20.2074	21.7126	22.8666	24.0148	27.5532	31.0746	36.5662	42.0312	47.4693	53.2751	59.0518	60.0893	61.2908	62.5714	63.9402	65.4078	66.9868	68.6921	70.5416	72.5568	74.7642	77.1966	79.8953	82.9129	86.3179	90.2016	94.6884	99.9538	106.254	113.982
12	233	Estonia	0	0	0	0	0	0	0	0.613979	2.45592	9.82367	39.2947	82.7256	85.5342	88.3481	91.1508	93.9216	96.6352	99.2608	101.76	104.084	106.174	107.953	109.319	110.14	110.232	109.334	107.045	102.704	118.527	136.738	157.684	181.764	209.426	241.18	277.603	319.345	367.136	421.792	484.226	544.11	610.847	685.078	767.461	858.658	872.964	886.038	897.581
11	234	Faeroe Islands	0	0	0	0	0	0	0	0	0	0	0	0.0334662	0.033547	0.0335943	0.033604	0.0335711	0.03349	0.0333542	0.0331556	0.0328848	0.0325299	0.0320762	0.031505	0.0307913	0.0299013	0.0287865	0.0273728	0.0255372	0.0315899	0.0390639	0.0482888	0.0596692	0.0737012	0.0909926	0.112287	0.138494	0.170721	0.21032	0.258931	0.318546	0.391574	0.480917	0.590065	0.723187	0.885246	1.0821	1.3206
6	238	Falkland Is.	0	0	0	0	0	0	0	0	0	0	0	0	0	0	0	0	0	0	0	0	0	0	0	0	0	0	0	0	0	0	0	0	0	0	0	0	0	0	0	0	0	0	0	0	0	0	0
24	242	Fiji	0	0	0	0	0	0	0	0	0	2.81119	3.11251	3.40697	3.72667	4.07322	4.4482	4.85311	5.28928	5.75781	6.25945	6.79439	7.36207	7.96086	8.58762	9.23706	9.90085	10.5662	11.2138	11.8142	12.3638	12.9377	13.5367	14.1619	14.8143	15.4949	16.2047	16.9449	17.7165	18.5206	19.3584	20.2872	21.2572	22.2698	23.3267	24.4292	25.0683	25.719	26.7525
11	246	Finland	0	0	0	0	0	0	0	0	0.816725	2.28683	13.0676	19.6014	25.6069	31.3198	36.7191	41.7802	46.4743	50.7665	54.6142	65.3419	74.925	83.0706	90.0987	96.0094	82.625	77.9688	146.625	274.707	298.343	323.998	351.843	382.062	414.856	450.443	489.059	530.958	576.417	625.735	724.405	836.054	1026.79	1146.16	1359.26	1501.24	1683.34	1766.61	1960.34
11	250	France	0	0	0	0	137.065	178.253	344.346	662.115	1577.57	2975.22	6849.83	7803.01	8723.74	7633.23	6561.77	6155.96	5754.38	5984.44	6199.3	7003.91	7766.5	9064.49	11989.7	17800.1	11890.7	15632.4	18449.3	20801.3	21207.6	21602.8	21986.4	22357.9	22716.4	23061.4	23391.9	23707.3	24006.4	24288.1	25542.9	26580.8	27241.8	27959.3	28617.5	28180.8	27654.1	27541.3	27013.8
6	254	French Guiana	0	0	0	0	0	0	0	0	0	0	0	0.489023	0.523749	0.560337	0.598756	0.638933	0.68074	0.723975	0.768339	0.813401	0.858549	0.902922	0.945301	0.983941	1.01629	1.03848	1.04425	1.0225	1.12142	1.22926	1.3467	1.47444	1.6132	1.76369	1.92664	2.10271	2.29255	2.49667	2.71548	2.94915	3.19756	3.46017	3.73583	4.02254	4.31711	4.61459	4.9075
24	258	French Polynesia	0	0	0	0	0	0	0	0	0	0	0	0.0172045	0.0253462	0.0373024	0.0548352	0.0805039	0.118013	0.172706	0.252246	0.367567	0.534134	0.773595	1.1158	1.60098	2.28146	3.22096	4.48625	6.11663	6.36659	6.62415	6.88924	7.16169	7.44129	7.72772	8.0206	8.31939	8.62346	8.93197	9.24392	9.58461	9.9278	10.2716	10.6137	10.9513	11.0556	11.1393	11.1983
9	262	Djibouti	0	0	0	0	0	0	0	0	0	0	0	0	0	0	0	0	0	0	0	0	0	0	0	0	0	0	0	0	0	0	0	0	0	0	0	0	0	0	3.18413	3.16379	3.14228	3.11944	3.0951	3.06904	3.04102	3.0107	2.97774
8	266	Gabon	0	0	0	0	0	0	0.53066	2.38797	3.42989	4.89449	6.92327	7.86121	8.92507	10.1315	11.4995	13.0503	14.808	16.7997	19.0562	21.6121	24.5063	27.7828	31.4912	35.6871	40.4331	45.7997	51.866	58.7206	59.8617	60.3577	60.8821	61.4378	62.0283	62.6575	63.3299	64.051	64.8274	65.6668	66.5787	67.575	68.6703	69.8834	71.2386	72.7685	74.5172	76.5475	78.9518
16	268	Georgia	0	0	0	0	6.43392	22.5187	78.8155	275.854	298.572	316.149	321.53	338.543	356.113	374.193	392.715	411.591	430.701	449.888	468.944	480.747	489.988	708.591	906.764	1082.52	819.32	960.302	1061.54	1112.82	699.244	747.378	798.373	852.32	909.3	969.372	1032.57	1098.9	1168.32	1240.73	1315.96	1393.75	1473.71	1555.3	1637.74	1720	1800.63	1877.67	1948.37
8	270	Gambia	0	0	0	0	0	0	0	0	0	0	0	0.208119	0.237147	0.270216	0.307889	0.350804	0.39969	0.455376	0.518804	0.59105	0.673336	0.767055	0.87379	0.995345	1.13377	1.29141	1.47092	1.67531	1.51214	1.36486	1.23193	1.11194	1.00364	0.905885	0.817652	0.738013	0.66613	0.601249	0.542687	0.813748	1.2202	1.82966	2.74353	4.11386	6.16864	9.24972	13.8697
17	275	Occupied Palestinian Territory	0	0	0	2.61034	10.4414	41.7655	167.062	167.903	128.392	136.952	136.952	133.944	130.736	127.319	118.422	109.846	101.582	93.6194	85.9497	78.564	71.4537	64.6104	58.0259	51.6924	45.6021	39.7476	34.1215	28.7169	31.3878	34.2978	37.4668	40.9167	44.6707	48.7537	53.1926	58.0161	63.2546	68.9411	72.4278	76.0609	79.8434	83.7783	87.8679	92.1142	90.9943	89.8423	88.6578
11	276	Germany	0	0	0	0	0	4.35634	13.0265	36.5653	109.481	327.958	2421.44	2186.29	1962.17	1633.84	1360.38	1050.6	806.596	806.596	1613.19	3226.38	4032.98	6452.77	10485.8	12905.5	6856.07	8872.56	9679.15	8872.56	8780	8687.45	8594.89	8502.34	11292.3	11313.2	11334.1	11354.9	11375.8	12098.9	12121.1	12143.2	12165.4	12187.5	14518.7	14530.2	14541.6	14553.1	14564.6
8	288	Ghana	0	0	0	0	0	1.66596	7.4968	33.7356	50.4831	75.5432	113.041	129.159	147.574	168.615	192.656	220.125	251.51	287.37	328.343	375.158	428.647	489.763	559.592	639.377	730.538	834.696	953.705	1089.68	1098.44	1107.64	1117.33	1127.56	1138.37	1149.84	1162.04	1175.07	1189.03	1204.05	1220.3	1237.95	1257.26	1278.54	1302.18	1328.73	1358.89	1393.7	1434.66
11	292	Gibraltar	0	0	0	0	0	0	0	0	0	0	0	0	0	0	0	0	0	0	0	0	0	0	0	0	0	0	0	0	0	0	0	0	0	0	0	0	0	0	0	0	0	0	0	0	0	0	0
24	296	Kiribati	0	0	0	0	0	0	0	0	0	0	0	0	0	0	0	0	0	0	0	0	0	0	5.91478	6.58991	7.34195	8.17963	9.1127	10.152	10.6891	11.2546	11.8501	12.4771	13.1372	13.8322	14.5641	15.3346	16.1459	17.0001	17.8995	18.8989	19.954	21.0681	22.2443	23.4862	24.3024	25.1469	26.0208
11	300	Greece	0	0	0	0	5.77038	11.0969	22.1938	44.3875	133.163	443.875	887.75	887.75	887.75	776.782	665.813	510.457	355.1	377.294	399.488	421.681	443.875	479.385	519.334	554.844	399.488	443.875	665.813	665.813	695.848	725.884	755.92	785.955	815.991	846.026	876.062	906.097	936.133	966.168	996.204	1026.24	1124.78	1232.64	1351.16	1480.77	1623.25	1797.25	1989.45
25	304	Greenland	0	0	0	0	0	0	0	0	0	0	0	0	0	0	0	0	0	0	0	0	0	0	0	0	0	0	0	0	0	0	0	0	0	0	0	0	0	0	0	0	0	0	0	0	0	0	0
4	308	Grenada	0	0	0	0	0	0	0	0	0	0.877752	1.59223	1.71705	1.85089	1.99428	2.14774	2.31182	2.48704	2.6739	2.8729	3.08445	3.30892	3.54658	3.79756	4.06181	4.33905	4.62869	4.92969	5.2405	5.65475	6.10161	6.58365	7.1036	7.66443	8.26935	8.9218	9.62549	10.3844	11.2029	12.0856	12.4515	12.8281	13.2157	13.6147	14.0254	14.464	14.916	15.3816
4	312	Guadaloupe	0	0	0	0	0	0	0	0.676334	1.26278	2.31573	4.11777	4.42787	4.75824	5.10961	5.48264	5.87781	6.29542	6.73548	7.19762	7.68098	8.18405	8.70443	9.23856	9.78132	10.3254	10.8606	11.3724	11.84	12.7459	13.7201	14.7676	15.8937	17.1042	18.4053	19.8035	21.306	22.9202	24.6542	26.5167	27.2349	27.9694	28.7204	29.4881	30.2724	31.108	31.9624	32.8356
24	316	Guam	0	0	0	0	0	0	0	0	0	0	0	0.153005	0.18805	0.230913	0.28326	0.347084	0.424749	0.519043	0.633222	0.771043	0.93676	1.13507	1.37096	1.64935	1.97443	2.34837	2.76885	3.22417	3.36683	3.51512	3.66918	3.82916	3.9952	4.16744	4.34599	4.53098	4.72249	4.92061	5.12539	5.35168	5.58593	5.82814	6.07831	6.33635	6.47034	6.60368	6.73593
4	320	Guatemala	0	0	0	0	0	14.6789	48.9297	163.099	168.333	170.106	165.446	177.483	190.226	203.683	217.851	232.713	248.239	264.372	281.027	409.859	529.96	546.499	559.212	567.514	570.614	567.399	397.289	424.877	414.984	405.194	395.504	385.909	376.405	366.985	357.646	348.38	339.184	330.049	320.969	311.937	346.599	383.535	424.042	472.664	518.824	552.125	568.557
8	324	Guinea	0	0	0	0	0	0.749986	3.37494	15.1872	22.0265	31.8248	45.764	52.0653	59.2305	67.3775	76.6399	87.1698	99.1395	112.745	128.208	145.78	165.748	188.435	214.21	243.49	276.747	314.517	357.408	406.108	409.144	412.341	415.714	419.281	423.064	427.085	431.374	435.963	440.891	446.207	451.968	458.245	465.127	472.728	481.193	490.719	501.57	514.121	528.922
6	328	Guyana	0	0	0	0	0	0	0.169272	1.01563	1.89594	3.47585	6.17737	7.61069	9.37042	11.5287	14.1729	17.4083	21.3614	26.1838	32.0556	39.1898	47.8358	51.2888	54.4203	61.5975	68.0921	73.8218	70.8129	74.8463	78.0075	81.2957	84.7154	88.2713	91.9683	95.8113	99.8055	103.956	108.268	112.747	117.398	122.812	128.461	134.353	140.498	146.904	158.061	170.04	182.9
4	332	Haiti	0	0	0	0	0	0	0	0	0	0	0	0.74131	1.09211	1.60725	2.36266	3.46859	5.08462	7.4409	10.8676	15.8355	23.0108	33.3255	48.0647	68.96	98.2624	138.709	25.5923	29.0686	35.928	44.3885	54.818	67.6672	83.4872	102.951	126.879	156.271	192.338	236.552	290.688	356.884	395.741	415.547	435.778	474.028	509.455	528.698	579.488
24	334	Heard and McDonald Isl.	0	0	0	0	0	0	0	0	0	0	0	0	0	0	0	0	0	0	0	0	0	0	0	0	0	0	0	0	0	0	0	0	0	0	0	0	0	0	0	0	0	0	0	0	0	0	0
11	336	Holy See	0	0	0	0	0	0	0	0	0	0	0	0	0	0	0	0	0	0	0	0	0	0	0	0	0	0	0	0	0	0	0	0	0	0	0	0	0	0	0	0	0	0	0	0	0	0	0
4	340	Honduras	0	0	0	0	0	3.87862	12.9287	43.0958	44.8423	45.9112	45.7606	56.4564	69.6148	85.7902	105.657	130.035	159.915	196.497	241.223	295.822	362.359	443.279	541.459	660.251	803.501	975.545	269.971	74.4594	76.739	79.0851	81.4994	83.9836	86.5397	89.1693	91.8745	94.6571	97.519	100.462	103.489	106.601	202.173	234.837	272.761	302.314	324.086	347.404	372.375
20	0	Hong Kong	0	0	0	0	0	0	0	0	0	0	0	0	0	0	0	0	0	0	0	0	0	0	0	0	0	0	0	0	0	0	0	0	0	0	0	0	0	0	0	0	0	0	0	0	0	0	0
12	348	Hungary	0	0	0	0	0	9.41863	37.6745	150.698	280.827	385.052	340.372	335.214	329.892	324.393	318.701	260.664	204.442	250.226	293.597	382.138	465.419	542.981	702.022	1060.32	816.807	978.416	931.752	1055.85	1162.46	1267.53	1371.04	1472.94	1573.21	1671.8	1768.69	1863.83	1957.18	2048.7	2138.33	2226.05	2494.99	2758.85	2908.96	3018.24	3158.08	3360.56	3591.49
11	352	Iceland	0	0	0	0	0	0	0	0	0	0.802413	1.40018	1.40426	1.40701	1.40828	1.40788	1.40559	1.40116	1.39429	1.38461	3.36063	6.50657	8.78735	8.44003	8.0615	6.55168	6.14937	4.73845	4.23796	4.27189	4.30407	4.33432	4.36241	4.38809	4.41107	4.43105	4.44767	4.46054	4.46921	4.47316	4.56495	4.65236	4.73417	4.80893	4.87484	4.78033	4.6741	4.55418
18	356	India	0	0	0	1440.74	2581.37	4625.06	8286.73	14847.4	26602.1	47663	85398	81516.3	77634.6	73784.9	69993.6	66281.8	62666.5	59160.6	55774.3	52514.8	49387	46393.8	43536.7	40815.7	38229.6	35776.3	33453.2	37170.2	39968	42976.3	46211.1	49689.3	53429.4	57450.9	61775.2	66425	71424.7	76800.7	82581.4	88797.3	95480.9	102668	110395	111986	113599	115294	116997
22	360	Indonesia	0	0	0	0.0908547	0.113568	3.15151	4.35737	6.02726	48.9303	100.983	163.708	197.814	237.477	283.513	336.847	398.533	469.769	551.914	646.515	755.323	880.33	1086.83	1328.34	1610.12	2281	2918.92	3311.79	3796.32	3914.57	4036.07	4160.9	4289.14	4420.88	4736.66	5063.49	5401.68	5751.56	6113.48	6148.42	6166.16	6168.27	6156.2	6131.29	7445.14	8619.96	9666.01	10592.9
17	364	Iran, Isl.Rep.of	0	0	3.97578	16.6208	136.223	771.073	4048.13	4359.12	3250	3200	4800	4894.48	4980.51	5058.1	5127.25	5187.96	5240.22	4653.37	4089.31	4179.89	4260.34	4376.72	4480.45	3047.67	3170.39	3280.45	3973.93	3847.3	3996.8	4067.82	4140.06	4213.53	4288.27	4364.27	4441.58	4520.2	4600.16	4681.48	4764.19	4848.3	5104.94	5359.7	5612.58	5863.59	6112.71	7024.84	7930.43
17	368	Iraq	0	0	2.53898	8.47073	28.2727	154.215	1387.93	1743.65	1750	2000	1200	1229.3	1255.67	1223.51	1191.35	1106.5	1024.57	1741.82	2415.22	2107.91	1815.22	1537.15	1167.56	819.895	790.656	761.417	915.223	702.939	700.134	697.328	694.521	691.712	688.903	686.093	683.281	680.469	677.656	674.842	707.277	741.256	776.854	814.145	853.21	894.131	1017.31	1157.44	1316.84
11	372	Ireland	0	0	0	0	0	1.18459	7.10757	42.6454	78.9792	142.912	247.556	247.984	248.144	248.002	247.517	246.644	245.327	243.499	241.079	246.162	249.737	319.456	457.014	576.607	404.736	496.786	695.135	1177.54	1407.82	1422.04	1433.78	1442.51	1447.62	1410.05	1368.29	1478.61	1691.51	1732.98	1869.83	2034.47	2003.4	2186.11	1482.86	1333.67	1314.82	1094.81	984.623
17	376	Israel	0	0	0	0	15.552	69.9839	314.927	356.077	306.321	367.585	413.533	593.604	850.364	1215.48	866.563	616.136	436.763	308.567	217.172	186.009	157.221	150.188	142.363	133.746	87.7672	97.8311	85.9531	59.2602	63.5207	67.6114	71.5323	75.2834	78.8646	82.276	85.5176	88.5893	91.4912	94.2233	96.2131	99.1779	102.194	105.258	108.368	111.52	111.341	111.109	110.821
11	380	Italy	0	0	0	9.41724	20.6002	36.8051	92.1593	232.119	969.322	2426.77	11881.7	10770.7	9724.25	8739.1	7812.22	5038.24	2440.3	3528.88	4536.04	4919.62	5480.55	6604.43	8326.12	11804.2	7283.12	7898.99	11230.5	10996.5	10927.3	10897.8	10868.3	10839	10809.7	10780.5	10751.3	10722.3	10693.3	10664.4	10635.6	10606.9	10903.2	11208	11521.6	11843.6	11689.9	11958.8	12334.1
8	384	Cote d'Ivoire	0	0	0	0	0	1.88556	7.91934	33.2612	47.8982	68.8245	98.7073	113.07	129.521	148.363	169.944	194.66	222.968	255.388	292.519	335.042	383.742	439.514	503.385	576.53	660.295	756.219	866.067	991.859	998.818	1006.11	1013.77	1021.83	1030.33	1039.33	1048.87	1059.03	1069.89	1081.53	1094.08	1107.68	1122.5	1138.77	1156.78	1176.91	1199.68	1225.82	1256.4
4	388	Jamaica	0	0	0	0	0	0	0	0	0	0	0	0.00501117	0.00987775	0.0194576	0.0383006	0.0753311	0.148033	0.290616	0.569904	1.11622	2.18316	4.26312	8.30934	16.161	31.3514	60.6336	29.2063	14.0022	16.2623	18.8862	21.932	25.4674	29.5706	34.3326	39.8586	46.2706	53.7101	62.3408	72.3526	73.9154	75.5056	77.1231	78.7681	80.4405	90.6427	102.129	115.058
23	392	Japan	0	0	0	0	0	0	4.43972	19.9787	27.8564	38.0464	50.0698	82.0903	112.958	174.301	233.146	342.638	447.001	630	770	960	960	992	801.879	878.596	1069.27	1341.17	1740.34	2528.58	2722.1	2697.35	2672.14	2646.45	2620.24	2575.62	2530.81	2485.79	2440.55	2395.07	2433.82	2470.15	2503.96	2535.13	2563.51	2618.43	2669.35	2814.39	3012.48
15	398	Kazakhstan	0	0	0	0	0	0	0.699776	0.87472	1.0934	1.36675	1.70844	2.13555	2.66943	3.33679	4.17099	5.21374	6.51717	8.14647	10.1831	12.7289	15.9111	19.8888	24.861	31.0763	38.8454	48.5567	60.6959	75.8699	94.8373	118.547	148.183	185.229	231.536	289.421	361.776	452.22	565.275	706.593	883.242	1104.05	1380.06	1725.08	2156.35	2695.44	3369.3	4211.62	5264.53
17	400	Jordan	0	0	0	4.03022	15.4297	59.1269	226.788	218.771	160.725	164.874	158.719	219.285	302.514	416.663	306.427	224.93	164.765	120.419	87.7883	76.3649	65.6978	63.7227	61.5104	59.0607	39.8273	46.3468	42.4766	30.6188	31.0345	30.7818	30.5279	30.273	30.0168	29.7596	29.5011	29.2415	28.9808	28.7189	28.4558	28.1916	29.3372	30.5253	31.7572	33.0342	34.3576	42.4281	52.3864
9	404	Kenya	0	0	0	0	0	1.68748	6.37655	24.1492	30.4554	38.4938	48.7619	60.9321	76.1398	95.143	118.889	148.562	185.64	231.973	289.869	338.067	386.232	453.671	521.063	588.411	655.712	722.968	843.178	963.307	986.32	997.508	1009.32	1021.83	1035.1	1049.23	1064.32	1080.49	1097.89	1116.7	1137.13	1159.45	1184.01	1211.22	1241.65	1276.07	1315.49	1361.39	1415.96
19	408	Dem.Rep.,Korea	0	0	0	0	0	3.54896	13.3086	49.9073	57.9245	65.8081	71.9114	90.4488	113.661	142.685	178.917	224.062	280.188	349.788	435.83	476.443	513.023	594.658	762.794	547.598	607.467	654.216	760.718	866.899	941.956	980.492	1020.21	1061.09	1103.12	1146.25	1190.45	1235.66	1281.79	1328.75	1376.41	1424.63	1424.18	1404.73	1384	1361.86	1338.16	1312.02	1291.12
19	410	Rep. of Korea	0	0	0	0	0	3.54617	13.2982	49.8681	57.831	65.6108	71.4967	96.5767	130.329	175.689	236.549	318.058	426.985	572.187	765.162	835.396	898.152	1039.11	1329.77	951.713	1051.46	1125.86	1297.73	1457.04	1581.63	1671.99	1766.52	1865.25	1968.17	2075.25	2186.39	2301.42	2420.1	2542.06	2666.82	2793.72	2759.58	2694.09	2624.37	2572.41	2513.26	2431.71	2341.37
17	414	Kuwait	0	0	0	0	0	0	0	0	0	0	0	0	0	0	0	0	0	0	0	0	0	0	0	0	0	0	0	0	0	0	0	0	0	0	0	0	0	0	61.4611	60.6704	59.788	58.8019	57.6979	56.4582	55.0604	53.4753	51.6639
15	417	Kyrgyzstan	0	0	0	0	2.97398	10.4089	36.4312	127.509	139.41	150.035	157.327	166.417	175.943	185.911	196.325	207.185	218.489	230.227	242.382	248.281	253.605	268.247	281.786	294.133	305.183	314.812	349.046	379.802	399.776	420.486	442.251	465.124	489.161	514.418	540.958	568.841	598.136	628.911	661.24	695.197	730.862	768.32	807.656	848.962	892.333	937.868	985.672
21	418	Lao	0	0	0	0	0	0	3.30322	12.3871	11.6245	12.5472	15.023	16.1316	17.3264	18.6135	20.0001	21.4934	23.1014	24.8327	26.6965	31.3402	35.9814	40.6209	45.2591	49.8964	54.5332	59.1697	73.9475	88.7218	90.1991	91.6764	93.1536	94.6308	96.108	97.5852	99.0623	100.539	102.017	103.494	115.32	127.146	138.972	150.797	162.622	174.447	186.272	197.936	222.269
17	422	Lebanon	0	0	0	0	4.35334	18.284	76.7929	322.53	418.921	532.323	649.717	727.177	813.091	908.18	792.913	691.332	601.825	522.966	453.491	414.224	375.767	382.563	386.646	387.546	293.329	294.486	317.175	244.02	228.605	221.142	213.802	206.58	199.47	192.464	185.555	178.736	171.997	165.33	158.724	152.168	161.629	168.754	175.811	182.691	189.254	217.621	210.724
10	426	Lesotho	0	0	0	0	0	0	0	0	0	0	0	0	0	0	0	0	0	0	0	0	0	0	0	0	0	0	0	0	0	0	0	0	0	0	0	0	0	0	51.8171	54.5347	57.6281	61.1871	65.3338	70.239	76.1492	83.4364	92.6906
12	428	Latvia	0	0	0	0	0	0	0	0.838805	3.35522	13.4209	53.6835	113.018	116.812	120.606	124.375	128.089	131.712	135.197	138.49	141.519	144.196	146.407	148.001	148.777	148.454	146.621	142.638	135.388	156.013	179.694	206.864	238.009	273.677	314.483	361.112	414.325	474.961	543.939	622.255	696.461	778.431	868.662	967.57	1075.43	1159.16	1245.6	1333.51
8	430	Liberia	0	0	0	0	0	1.08291	4.87309	21.9289	33.1491	50.1014	75.7104	79.7534	84.0123	88.4983	93.2238	98.2015	103.445	108.968	114.786	120.914	127.369	134.169	141.331	148.875	156.822	165.193	174.011	183.299	184.976	186.74	188.598	190.561	192.638	194.844	197.192	199.703	202.395	205.297	208.438	211.857	215.604	219.739	224.343	229.523	235.425	242.255	250.318
7	434	Libyan A.J.	0	0	0	0	18.0516	81.2324	365.546	413.309	355.556	426.667	480	545.977	613.282	557.931	501.252	531.893	563.066	594.77	627.005	646.576	666.412	471.138	271.878	411.802	554.382	699.619	706.26	712.901	663.854	668.995	674.145	679.303	684.469	689.644	694.828	700.019	705.22	710.428	715.645	775.657	783.254	790.863	798.486	806.12	813.768	821.428	870.623
11	438	Liechtenstein	0	0	0	0	0	0.440812	1.51135	5.18179	5.4958	5.70358	5.6883	5.70504	5.71643	5.72181	5.72044	5.71143	5.69376	5.66621	5.62731	5.5753	5.50797	5.42254	5.31542	5.18178	5.01495	4.8051	4.53675	4.18273	4.2385	4.29306	4.34619	4.39765	4.44717	4.49444	4.53912	4.5808	4.61906	4.65338	4.68318	4.70781	4.72648	4.73828	4.74215	4.7368	4.72068	4.69187	4.64799
12	440	Lithuania	0	0	0	0	0	0	0.250152	1.00061	4.00243	16.0097	64.0389	134.819	139.551	144.321	149.106	153.879	158.607	163.248	167.753	172.059	176.089	179.747	182.908	185.413	187.05	187.531	186.447	183.188	212.071	245.461	284.054	328.649	380.163	439.653	508.332	587.592	679.032	784.482	906.039	1024.75	1158.63	1309.53	1479.52	1670.89	1833.79	2011.62	2205.56
11	442	Luxembourg	0	0	0	0	0	0.997254	4.48764	20.1944	28.109	38.2827	50.0977	50.2429	50.3408	50.3855	50.3703	50.2875	50.128	49.8808	49.5331	49.069	48.4689	47.7082	46.7547	45.5653	44.0801	42.2109	39.818	36.6546	38.2758	39.95	41.6762	43.453	45.2786	47.15	49.0639	51.0153	52.9985	55.0057	57.0277	62.2813	67.926	73.9665	80.3994	87.2086	85.4875	88.076	90.0804
20	446	Macau	0	0	0	0	0	0	0	0	0	0	0	0	0	0	0	0	0	0	0	0	0	0	0	0	0	0	0	0	0	0	0	0	0	0	0	0	0	0	0	0	0	0	0	0	0	0	0
9	450	Madagascar	0	0	0	0	0	0	0	0	0	0	0	0.33964	0.67811	1.35387	2.70302	5.39659	10.7742	21.5102	42.9439	64.3007	85.5801	121.019	156.329	191.507	226.555	296.803	359.735	422.426	430.362	436.428	442.854	449.679	456.949	464.717	473.045	482.007	491.692	502.208	513.689	526.298	540.245	555.798	573.309	593.253	616.285	643.35	675.863
10	454	Malawi	0	0	0	0	0	0.417774	1.57153	5.91273	7.24902	8.87426	10.8452	13.2185	16.1108	19.6355	23.9307	29.1648	35.5428	43.3145	52.7842	61.8729	70.9052	84.8292	98.6655	112.414	126.072	139.641	151.031	162.342	164.865	167.961	171.258	174.778	178.547	182.598	186.967	191.699	196.847	202.478	208.672	215.532	223.188	231.808	241.617	252.919	266.144	281.914	301.184
21	458	Malaysia	0	0	0	0	0	0	0.308403	1.15651	1.43021	1.77983	2.22215	3.33306	4.99937	7.49879	11.2478	16.8713	25.3063	37.9587	56.9371	60.0993	63.2616	75.6601	88.0583	100.457	112.855	125.253	156.565	187.877	194.393	200.908	207.424	213.939	220.455	226.97	233.486	240.001	246.517	253.032	265.684	278.335	290.987	303.638	316.29	411.177	506.063	600.937	920.489
18	462	Maldives	0	0	0	0	0	0	0	0	0	0	0	0.00459121	0.00676156	0.00994721	0.0146162	0.0214474	0.0314226	0.0459548	0.0670678	0.0976405	0.141732	0.204996	0.295177	0.422604	0.600466	0.844226	1.16847	1.57605	1.58489	1.59298	1.60022	1.60655	1.61184	1.61601	1.61891	1.62042	1.62037	1.61858	1.61485	1.66282	1.70954	1.75442	1.79672	1.8355	1.97344	2.11412	2.25467
8	466	Mali	0	0	0	0	0	1.36418	6.1388	27.6246	39.9712	57.5839	82.4962	93.8145	106.678	121.295	137.905	156.775	178.213	202.565	230.224	241.648	252.913	270.3	287.446	309.699	341.998	368.068	426.676	484.462	492.718	497.89	503.36	509.16	515.325	521.897	528.927	536.472	544.602	553.403	562.977	573.452	584.99	597.796	612.138	628.375	646.998	668.708	694.545
12	470	Malta	0	0	0	0	0	0	0	0	0	0	0	0.384305	0.473424	0.58282	0.716971	0.881288	1.0823	1.32784	1.62729	1.99177	2.43444	2.37654	2.31567	4.50284	2.18327	4.22117	8.13006	13.6356	13.9613	14.2828	14.6002	14.9132	15.222	15.9049	16.5797	17.246	17.9038	18.553	19.5624	20.5589	21.5423	27.3079	26.8685	27.4254	27.6571	27.5639	27.1455
4	474	Martinique	0	0	0	0	0	0	0	0	0	0	0	0.00148319	0.00291338	0.00571678	0.0112048	0.0219326	0.0428676	0.0836429	0.162881	0.316446	0.613097	1.18386	2.27654	4.3548	8.27319	15.5703	7.22676	3.28272	3.78677	4.36647	5.03278	5.79809	6.67649	7.68385	8.83807	10.1592	11.6698	13.3949	15.3621	15.6076	15.8406	16.0584	16.258	16.4355	17.179	17.9204	18.6503
8	478	Mauritania	0	0	0	0	0	0.579109	2.31644	9.26574	11.8801	15.1529	19.1959	21.8162	24.7917	28.1703	32.0062	36.3605	41.3026	46.9112	53.2752	55.8739	58.4297	62.3926	66.2908	73.2181	79.3069	84.6362	98.0096	111.161	112.286	112.952	113.656	114.399	115.188	116.026	116.92	117.876	118.903	120.009	121.207	122.512	123.94	125.515	127.266	129.232	131.466	134.041	137.066
9	480	Mauritius	0	0	0	0	0	0	0	0	0	0	0	0.0355618	0.046658	0.0611665	0.0801138	0.104825	0.137003	0.17883	0.233091	0.303312	0.393932	0.510475	0.659735	0.849894	1.09053	1.39232	1.76612	2.22064	2.75788	3.42465	4.25206	5.27864	6.55212	8.1316	10.0902	12.5186	15.5287	19.2591	23.881	29.6064	36.6967	37.7676	37.0805	46.2131	47.1636	52.8826	54.158
3	484	Mexico	0	0	0	0	0	27.9674	90.3553	245.59	1535.65	1962.15	2559.16	2754.57	2964.91	3191.32	3435.02	3697.33	3979.67	4283.58	4610.7	5420.51	6261.4	7240.78	8257.46	9312.56	10407.2	11542.6	471.11	1922.83	2126.65	2337.98	2557.05	2784.06	3019.27	3262.92	3515.24	3776.48	4046.92	4326.82	4616.44	4916.08	5226.01	5546.54	5877.96	6220.59	6574.76	6938.63	8527.49
11	492	Monaco	0	0	0	0	0	0	0	0	0	0	0	0	0	0	0	0	0	0	0	0	0	0	0	0	0	0	0	0	0	0	0	0	0	0	0	0	0	0	0	0	0	0	0	0	0	0	0
20	496	Mongolia	0	0	0	0	0	0	0	0	204.302	271.356	361.495	368.77	376.193	383.768	391.498	399.387	407.439	415.658	424.05	438.106	451.842	581.579	708.702	745.54	521.053	515.894	510.787	505.729	497.95	494.668	491.409	488.17	484.954	481.758	478.583	475.43	472.297	469.184	466.093	463.021	462.56	465.743	468.947	472.174	475.423	483.365	526.437
14	498	Rep. of Moldova	0	0	0	0	0	10.066	35.231	123.309	133.583	141.657	144.499	152.217	160.201	168.433	176.888	185.529	194.31	203.167	212.018	220.755	228.216	330.699	477.292	456.932	434.576	546.196	635.411	772.967	504.208	540.204	578.549	619.362	662.764	708.873	757.802	809.661	864.55	922.556	983.748	1048.17	1115.84	1186.73	1260.76	1337.78	1417.55	1499.72	1583.78
4	500	Montserrat	0	0	0	0	0	0	0	0	0	0	0	2.27035e-05	4.51809e-05	8.99048e-05	0.000178886	0.000355907	0.000708042	0.00140846	0.00280151	0.00557184	0.0110806	0.0220337	0.0438094	0.0870964	0.173135	0.34413	0.683925	1.35907	1.46951	1.58892	1.71804	1.85765	2.00859	2.1718	2.34827	2.53908	2.74538	2.96845	3.20963	3.31441	3.42261	3.53433	3.6497	3.76883	3.89617	4.02781	4.16389
7	504	Morocco	0	0	0	0	45.1577	203.21	914.443	1033.93	889.452	1067.34	1200.76	1250.25	1300.88	1352.59	1405.27	1458.83	1513.13	1568.02	1623.34	1709.9	1787.26	1639.69	1498.24	1611.46	1387.95	1110.67	1597.07	1188.55	1236.1	1283.16	1329.75	1375.85	1421.48	1466.63	1511.3	1555.48	1599.19	1642.42	1685.17	1727.44	2027.27	2324.14	2618.07	2909.04	3197.06	3482.12	3764.24
10	508	Mozambique	0	0	0	0	0	0.546127	2.29373	9.63368	13.0623	17.651	23.7513	26.6074	29.8052	33.3855	37.3937	41.8806	46.9032	52.5247	58.8163	84.1509	109.239	159.441	209.141	258.329	306.999	355.141	441.611	527.124	544.286	561.428	578.552	595.657	612.742	629.808	646.855	663.883	680.892	697.881	714.851	731.802	749.172	831.958	923.891	1025.98	1089.51	1156.96	1228.59
17	512	Oman	0	0	0	0	0	0	0	0	0	0	0	0	0	0	0	0	0	0	0	0	0	0	0	0	0	0	0	0	0	0	0	0	0	0	0	0	0	0	146.022	144.528	144.922	145.268	145.278	144.89	144.023	142.367	143.366
10	516	Namibia	0	0	0	0	0	0	0	0	0	0	0	0	0	0	0	0	0	0	0	0	0	0	0	0	0	0	0	0	0	0	0	0	0	0	0	0	0	0	264.205	276.863	290.179	304.19	318.934	334.452	350.788	367.987	386.098
24	520	Nauru	0	0	0	0	0	0	0	0	0	0	0	0	0	0	0	0	0	0	0	0	0	0	0	0	0	0	0	0	0	0	0	0	0	0	0	0	0	0	0	0	0	0	0	0	0	0	0
18	524	Nepal	0	0	0	0	0	29.7609	111.603	418.513	475.583	540.435	614.131	582.262	552.047	523.4	496.24	470.489	446.074	422.926	400.98	377.546	355.059	344.299	332.562	320.113	307.179	293.951	334.036	364.403	392.693	423.139	455.903	491.162	529.105	569.936	613.875	661.158	712.037	766.786	825.699	906.439	955.968	1090.96	1116.61	1119.8	1124.08	1195.23	1171.33
11	528	Netherlands	0	0	0	0	0	0	2.88442	5.76883	11.5377	23.0753	46.1507	43.953	41.86	39.8667	37.9683	36.1603	34.4383	32.7984	55.5583	72.2276	79.4503	95.3404	107.258	189.764	135.546	204.95	274.354	343.757	349.372	354.987	360.602	366.216	371.831	377.446	383.06	388.675	394.29	399.905	405.519	411.134	453.163	497.681	536.667	578.224	622.986	685.796	752.405
4	530	Neth.Antilles	0	0	0	0	0	0	0	0	0	0	0	4.04422e-05	7.94149e-05	0.000155778	0.000305202	0.000597147	0.00116654	0.00227482	0.00442679	0.00859345	0.0166331	0.0320793	0.0615951	0.117597	0.222827	0.41782	0.771366	1.2468	1.33203	1.42238	1.51804	1.61919	1.72597	1.8385	1.95687	2.0811	2.21114	2.34684	2.48794	2.51562	2.53975	2.55966	2.5745	3.01979	3.14944	3.52603	3.69937
4	533	Aruba	0	0	0	0	0	0	0	0	0	0	0	4.11868e-06	8.08753e-06	1.58639e-05	3.108e-05	6.0808e-05	0.000118786	0.00023163	0.00045073	0.000874926	0.00169335	0.00326561	0.00626962	0.0119683	0.0226739	0.0425046	0.0784393	0.141068	0.150697	0.160901	0.171702	0.183119	0.195168	0.207862	0.221208	0.235207	0.249853	0.265125	0.280992	0.284035	0.286663	0.288797	0.290338	0.321141	0.38092	0.599229	0.691788
24	540	New Caledonia	0	0	0	0	0	0	0	0.667437	1.23844	2.24814	3.91993	4.28027	4.66925	5.08812	5.53788	6.01918	6.53212	7.07605	7.64925	8.2485	8.86843	9.50065	10.1323	10.7439	11.3057	11.771	12.0628	12.043	12.5149	12.9985	13.4932	13.9983	14.5126	15.0349	15.5635	16.0965	16.6313	17.165	17.6939	18.2641	18.8224	19.3618	19.8735	20.3464	20.3519	20.2806	20.1141
24	548	Vanuatu	0	0	0	0	0	0	0	0	0	0	0	0	0	0	0	0	0	0	0	0	0	0	0.0840666	0.126449	0.190194	0.286068	0.43026	0.647119	0.68136	0.717411	0.755371	0.795338	0.837421	0.881729	0.928382	0.977503	1.02922	1.08368	1.14102	1.20472	1.27199	1.34301	1.41799	1.49717	1.5492	1.60304	1.65875
24	554	New Zealand	0	0	0	0	0	0	0	0	0	0	0	0	0	0	0	0	0	0	0	0	0	0	0	0	0	0	0	0	0	0	0	0	0	0	0	0	0	0.333039	0.659484	1.5388	3.59052	8.37789	19.5484	45.613	117.979	213.2	385.01
4	558	Nicaragua	0	0	0	0	0	8.77182	29.2394	97.4646	101.171	103.192	102.157	109.885	118.124	126.895	136.215	146.1	156.56	167.599	179.213	191.387	204.091	217.276	230.868	244.755	258.782	272.727	131.211	62.8089	66.9807	71.4247	76.1584	81.2	86.5691	92.2862	98.3733	104.854	111.751	119.093	126.906	135.219	159.332	184.825	214.374	226.247	237.945	269.558	306.14
8	562	Niger	0	0	0	0	0	4.69695	18.7878	75.1512	100.202	133.602	178.136	203.584	232.668	265.906	303.893	347.306	396.921	453.624	518.427	547.229	576.03	619.233	662.435	735.805	788.363	864.045	1008.05	1152.06	1173.23	1183.09	1193.46	1204.41	1215.99	1228.28	1241.34	1255.29	1270.24	1286.31	1303.7	1322.59	1343.26	1366.02	1391.32	1419.71	1451.98	1489.21	1533.01
8	566	Nigeria	0	0	0	0	0	6.08537	25.5585	107.346	153.001	217.875	309.999	413.984	552.844	738.277	985.9	1316.57	1758.13	2347.76	3135.13	3767.87	4402.49	4724.06	5046.55	5685.84	6326.98	6969.97	8883.93	11438.9	11575.9	11664.1	11756.8	11854.4	11957.5	12066.6	12182.5	12306	12438	12579.7	12732.7	12898.5	13079.5	13278.3	13498.7	13745.3	14024.7	14345.9	14722.4
24	570	Niue	0	0	0	0	0	0	0	0	0	0	0	0.00137764	0.00206951	0.00310883	0.00467008	0.00701533	0.0105383	0.0158303	0.0237796	0.0357205	0.0536573	0.0806003	0.121072	0.181863	0.273178	0.410339	0.616365	0.925829	0.974692	1.02613	1.08029	1.1373	1.19733	1.26052	1.32704	1.39708	1.47081	1.54844	1.63016	1.72096	1.81682	1.91802	2.02485	2.13764	2.2567	2.3824	2.46489
24	574	Norfolk Isl.	0	0	0	0	0	0	0	0	0	0	0	0	0	0	0	0	0	0	0	0	0	0	0	0	0	0	0	0	0	0	0	0	0	0	0	0	0	0	0	0	0	0	0	0	0	0	0
11	578	Norway	0	0	0	0	0	0	0	0	0.816725	3.2669	65.338	143.744	153.641	162.863	171.356	179.058	185.897	191.784	196.611	200.241	202.5	256.105	300.756	328.246	151.331	277.077	314.366	338.887	347.102	355.468	363.988	372.66	381.485	390.463	399.594	408.876	418.308	427.89	437.621	472.815	530.101	588.874	660.648	737.925	800	833.266	869.164
24	580	Northern Mariana	0	0	0	0	0	0	0	0	0	0	0	0.000190205	0.000281711	0.000417031	0.000617018	0.000912369	0.00134823	0.00199091	0.00293768	0.00433099	0.00637908	0.00938579	0.0137933	0.0202434	0.0296644	0.0433934	0.0633465	0.0922519	0.0968061	0.101582	0.106591	0.111843	0.11735	0.123125	0.129179	0.135527	0.142182	0.149159	0.156473	0.164595	0.173133	0.182107	0.191539	0.201451	0.211868	0.222815	0.229639
24	583	Micr.,Fed.St.of	0	0	0	0	0	0	0	0	0	0	0	0	0	0	0	0	0	0	0	0	0	0	0	0	0	0	0	0	0	0	0	0	0	0	0	0	0	0	0	0	0	0	0	0	0	0	0
24	584	Marshall Islands	0	0	0	0	0	0	0	0	0	0	0	0	0	0	0	0	0	0	0	0	0	0	0	0	0	0	0	0	0	0	0	0	0	0	0	0	0	0	0	0	0	0	0	0	0	0	0
24	585	Palau	0	0	0	0	0	0	0	0	0	0	0	0.0245828	0.0305443	0.0379472	0.047139	0.0585502	0.0727149	0.0902947	0.11211	0.139176	0.172751	0.214394	0.266033	0.330055	0.409413	0.507761	0.629614	0.780554	0.820949	0.863433	0.908114	0.955104	1.00452	1.0565	1.11116	1.16865	1.22911	1.29269	1.35956	1.43386	1.51221	1.59485	1.68199	1.77389	1.83347	1.89503	1.95866
18	586	Pakistan	0	0	0	179.511	271.987	412.101	624.396	946.055	1433.42	2171.84	3290.67	3211.48	3119.5	3054.05	2974.73	2884.59	2786.25	2806.11	2799.34	2852.7	2873.22	2713.79	2559.6	2326.91	2395.72	2316.94	2738.2	3063.73	3255.74	3496.24	3756.2	4037.24	4341.12	4669.74	5025.16	5409.64	5825.62	6275.72	6762.85	7432.35	7739.58	8652.19	8674.91	8537.84	8423.32	8682.82	8269.78
4	591	Panama	0	0	0	0	0	4.02696	13.3996	44.5907	46.0324	46.5867	45.5115	49.772	54.3883	59.3805	64.7678	70.567	76.7912	83.4484	90.5388	98.0519	105.962	114.22	122.75	131.427	140.067	148.387	70.1786	32.8214	34.2913	35.821	37.4121	39.0665	40.786	42.5723	44.4272	46.3522	48.3489	50.4187	52.5628	58.1659	64.3467	71.1611	78.6701	89.5999	100.235	108.722	125.259
22	598	Papua New Guinea	0	0	0	1.94231	8.74042	13.1106	58.9978	265.49	369.52	503.213	658.387	677.881	697.289	716.491	735.344	753.675	771.273	787.884	803.193	816.81	828.245	836.871	841.87	842.145	836.169	821.713	795.279	750.769	743.96	736.856	729.439	721.687	713.579	705.088	696.184	686.834	677.002	666.644	655.711	644.144	631.876	618.826	604.897	589.971	573.134	555.015	535.377
6	600	Paraguay	0	0	0	0	0	1.20151	4.21593	14.8635	16.319	17.648	18.4988	22.4448	27.2192	32.9896	39.9552	48.3508	58.4519	70.5787	85.0991	87.4163	89.3315	103.769	116.779	128.178	137.72	145.072	136.139	125.849	130.96	135.936	140.771	145.463	150.006	154.395	158.625	162.688	166.58	170.293	190.64	210.365	229.442	247.842	265.535	272.024	278.06	283.617	288.666
6	604	Peru	0	0	0	0	27.7572	99.926	359.734	1295.04	1441.96	1570.87	1644.1	1713.62	1784.39	1856.1	1928.39	2000.78	2072.7	2143.38	2211.9	2415.46	2597.61	2672.24	2726.21	2756.03	2756.89	2721.75	816.992	849.379	829.749	810.178	790.65	771.152	751.666	732.174	712.655	693.087	673.442	653.69	633.798	613.724	697.847	778.281	866.308	968.33	1061.03	1212.41	1537.41
21	608	Philippines	0	0	0	0	0	2.33139	8.393	30.2148	30.9888	34.587	40.6728	40.6383	40.6085	40.5828	40.5607	40.5416	40.5251	40.5109	40.4987	40.4882	40.4791	72.8483	105.208	137.56	169.906	202.247	323.566	505.532	536.737	567.941	599.144	630.347	661.55	692.753	723.955	755.157	786.358	817.559	848.76	879.96	1014.35	1217.21	1460.64	1754.02	2047.38	2332.2	2575.33
24	612	Pitcairn	0	0	0	0	0	0	0	0	0	0	0	0	0	0	0	0	0	0	0	0	0	0	0	0	0	0	0	0	0	0	0	0	0	0	0	0	0	0	0	0	0	0	0	0	0	0	0
12	616	Poland	0	0	0	0	0	0.968813	2.01836	4.56089	14.2528	29.6851	185.532	255.107	347.873	507.314	724.734	792.678	849.298	1115.38	1371.58	1515.74	1651.48	1939.19	2838.76	4294.97	4158.7	4573.51	5450.85	6143.62	6353.01	6603.87	6862.47	7128.75	7402.61	7683.85	7972.22	8267.34	8568.71	8875.68	9187.4	9502.78	9957.39	10630.4	11335.8	12799.5	14187.3	16364.1	18401.6
11	620	Portugal	0	0	0	0	2.00724	9.03256	40.6465	182.909	254.784	347.427	455.774	497.92	489.123	479.998	470.513	414.566	360.241	351.581	342.473	416.065	483.961	584.51	675.035	897.801	615.013	847.73	1259.35	1184.36	1524.79	1558.03	1573.56	1588.6	1603.07	1619.15	1634.47	1648.95	1662.48	1674.96	1682.55	1689.39	1750.38	1815.48	1828.86	1926.98	2043.49	2167.18	2327.04
8	624	Guinea-Bissau	0	0	0	0	0	0	0.344218	1.54898	2.31037	3.44567	5.13833	5.86891	6.70335	7.65643	8.745	9.98834	11.4084	13.0304	14.883	16.999	19.4157	22.176	25.3288	28.9297	33.0425	37.7399	43.1052	49.2331	49.9899	50.7911	51.6412	52.5456	53.5107	54.5438	55.6535	56.8503	58.1466	59.5576	61.1018	62.8027	64.6898	66.8013	69.1873	71.9159	75.0816	78.821	83.3404
21	626	East Timor	0	0	0	0	0	0	0	0	0	0.83475	1.01641	1.26911	1.58488	1.97947	2.47257	3.08882	3.85899	4.82154	6.02455	7.52814	9.40743	11.7563	14.6922	18.3619	22.9486	28.6818	35.848	44.8054	45.6347	46.4794	47.3397	48.2159	49.1084	50.0173	50.9431	51.8861	52.8465	53.8247	54.821	59.5876	64.7686	70.4001	76.5213	83.1747	86.7903	90.5631	94.5
4	630	Puerto Rico	0	0	0	0	0	0	0	0	0	0	0	0.00436474	0.00643983	0.00949329	0.0139812	0.0205687	0.0302238	0.0443507	0.06498	0.0950348	0.138702	0.201938	0.293143	0.424021	0.610607	0.874302	1.24246	1.74721	2.26034	2.9237	3.78112	4.88914	6.3207	8.16988	10.5579	13.6411	17.6208	22.7562	29.3811	37.9248	45.3466	52.606	65.4164	78.9389	93.6284	108.256	122.27
17	634	Qatar	0	0	0	0	0	0	0	0	0	0	0	0	0	0	0	0	0	0	0	0	0	0	0	0	0	0	0	0	0	0	0	0	0	0	0	0	0	0	6.36809	6.54247	6.71018	6.86859	7.01443	7.14358	6.96676	6.76625	6.53712
9	638	Reunion	0	0	0	0	0	0	0	0	0	0	0	0.0720036	0.0886515	0.10907	0.134085	0.164692	0.202089	0.247708	0.303253	0.370739	0.452524	0.55134	0.6703	0.812874	0.982789	1.18383	1.4194	1.69173	2.01962	2.41088	2.8777	3.4346	4.09892	4.89127	5.83623	6.96307	8.88467	10.7823	12.5498	14.2237	15.4916	17.9725	18.7441	27.979	30.9658	30.4299	27.9187
12	642	Romania	0	0	0	0	0	14.9248	74.6238	373.119	1038.72	1571.9	2194.29	2156.66	2117.66	1817.53	1526.28	1368.88	1215.7	1304.08	1384.5	1568.15	1734.91	1882.79	2009.27	2878.67	2274.48	3415.56	3158.08	3562.43	4210.43	4454.19	4709.69	4977.12	5256.63	5548.25	5851.91	6167.39	6494.31	6832.04	7179.71	7536.07	8177.72	8487.5	8793.41	9187.27	9530.34	9824.37	10054
16	643	Russian Fed.	0	0	0	0	0	97.3093	113.528	132.449	154.524	1308.72	1526.85	1717.7	1908.56	2099.41	2290.27	2290.27	2290.27	2481.12	2671.98	2862.84	3053.69	4580.54	6870.8	7110.74	7110.74	9161.07	11451.3	12978.2	14701.5	16424.8	18148.1	19871.4	21654.1	23398.2	25149	26908.5	28679.4	30465	32202.8	34214.3	36448.2	43155.4	46687.9	53637.2	58111.5	66967.3	77064.9
9	646	Rwanda	0	0	0	0	0	0	0.390077	1.56031	1.95691	2.42063	2.92925	4.21223	6.05468	8.69921	12.4929	17.932	25.7248	36.8822	52.8444	65.0209	76.7428	91.7564	106.126	119.812	132.77	144.948	155.721	165.614	167.17	168.621	170.165	171.812	173.573	175.463	177.498	179.695	182.079	184.676	187.52	190.653	194.127	198.009	202.386	207.377	213.142	219.911	228.027
8	654	St. Helena	0	0	0	0	0	0	0	0	0	0	0	0.00146657	0.00183014	0.00228383	0.00284996	0.0035564	0.00443791	0.00553787	0.0069104	0.00862302	0.01076	0.0134264	0.0167535	0.0209048	0.0260844	0.0325472	0.0406108	0.0506716	0.063328	0.0791456	0.0989141	0.12362	0.154497	0.193086	0.241314	0.301587	0.376915	0.471058	0.588715	0.735759	0.91953	1.1492	1.43624	1.79497	1.99405	2.2152	2.39024
4	659	St.Kitts & Nevis	0	0	0	0	0	0	0	0	0	0	0	6.42036e-05	0.000127655	0.000253787	0.000504493	0.00100275	0.00199285	0.00396011	0.00786835	0.0156316	0.03105	0.0616679	0.122459	0.24314	0.482669	0.958008	1.90113	3.77201	4.07789	4.40856	4.76604	5.1525	5.57028	6.02192	6.51017	7.038	7.6086	8.22544	8.89228	9.18105	9.47918	9.78697	10.5358	10.4955	12.3761	12.866	13.7385
4	660	Anguilla	0	0	0	0	0	0	0	0	0	0	0	0	0	0	0	0	0	0	0	0	0	0	0	0	0	0	0	0	0	0	0	0	0	0	0	0	0	0	0	0	0	0	0	0	0	0	0
4	662	Saint Lucia	0	0	0	0	0	0	0	0	0	0	0	0.107542	0.115539	0.12404	0.133058	0.142605	0.152684	0.163294	0.174422	0.186043	0.198115	0.210573	0.223322	0.236223	0.249085	0.261634	0.273483	0.284077	0.30573	0.329006	0.354022	0.380905	0.409791	0.440824	0.474158	0.509959	0.548403	0.589678	0.633985	0.650902	0.668186	0.685838	0.703859	0.722249	0.741833	0.761829	0.782235
2	666	St.Pierre & Miq.	0	0	0	0	0	0	0	0	0	0	0	1.62302e-05	3.25041e-05	6.50953e-05	0.000130364	0.000261075	0.000522841	0.00104706	0.00209687	0.00419922	0.00840938	0.0168406	0.0337247	0.0675362	0.135246	0.270837	0.542363	1.0861	1.17527	1.27177	1.37619	1.48918	1.61144	1.74375	1.88692	2.04184	2.20948	2.39089	2.58719	2.67377	2.76324	2.85571	2.95127	3.05003	3.1556	3.26482	3.37782
4	670	St.Vin. & Gren.	0	0	0	0	0	0	0	0	0	0	0	8.37342e-05	0.000164619	0.000323336	0.000634418	0.00124335	0.00243353	0.00475587	0.00927845	0.0180656	0.0350921	0.0679748	0.131224	0.25226	0.482353	0.915871	1.72237	3.19401	3.42625	3.67454	3.93988	4.22331	4.52591	4.84883	5.19322	5.56029	5.95128	6.36746	6.81009	6.9532	7.09614	7.23853	7.37993	7.51984	7.66621	7.81018	7.95101
11	674	San Marino	0	0	0	0	0	0	0	0	0	0	0	0.0146229	0.0149214	0.0152259	0.0155366	0.0158537	0.0161772	0.0165074	0.0168443	0.017188	0.0175388	0.0178967	0.018262	0.0186347	0.019015	0.019403	0.019799	0.0202031	0.0212664	0.0223857	0.0235639	0.0248041	0.0261096	0.0274837	0.0289303	0.0304529	0.0320557	0.0337428	0.0355188	0.0373882	0.039356	0.0414273	0.0436077	0.0459029	0.0483188	0.0508619	0.0535388
8	678	Sao Tome & Pr.	0	0	0	0	0	0	0	0	0	0	0	0.0947549	0.118497	0.148187	0.185316	0.231748	0.289814	0.362428	0.453236	0.566795	0.708807	0.8864	1.10849	1.38622	1.73354	2.16787	2.71103	3.39027	3.68637	4.01332	4.37447	4.77359	5.21484	5.70284	6.24274	6.84023	7.50166	8.23408	9.0453	9.94403	10.9399	12.0437	13.2673	14.6239	16.1283	17.7969	19.6477
17	682	Saudi Arabia	0	0	0	0	0	0	0	0	0	0	0	0	0	0	0	0	0	0	0	0	0	0	0	0	0	0	0	0	0	0	0	0	0	0	0	0	0	0	1038.12	1022.82	1034.43	1033.84	1031.82	1028.18	1022.69	1026.18	1029.99
8	686	Senegal	0	0	0	0	0	0.276107	1.10443	4.41771	6.10093	8.39728	11.526	14.4474	18.1089	22.6979	28.449	35.6567	44.6894	56.0092	70.1949	87.9716	110.248	138.163	173.142	216.973	271.894	340.711	426.938	534.978	542.706	550.872	559.52	568.703	578.483	588.929	600.127	612.176	625.195	639.332	654.764	671.715	690.467	711.382	734.937	761.776	792.79	829.261	873.116
9	690	Seychelles	0	0	0	0	0	0	0	0	0	0	0	0.0884166	0.108654	0.133402	0.163618	0.200449	0.245254	0.299633	0.365452	0.444858	0.540277	0.654374	0.789955	0.94975	1.136	1.34967	1.5889	1.84601	1.86814	1.89014	1.91198	1.93361	1.95501	1.97613	1.99692	2.01735	2.03734	2.05686	2.07583	2.12307	2.1705	2.21804	2.26556	2.31294	2.40142	2.49181	2.58394
8	694	Sierra Leone	0	0	0	0	0	0	0	0	0.938347	1.13568	1.32037	1.44178	1.57285	1.71401	1.86559	2.02781	2.20072	2.38411	2.57741	2.77955	2.98874	3.20218	3.41559	3.62247	3.81289	3.97129	4.07211	4.06957	4.46461	4.89553	5.3651	5.87623	6.4319	7.03513	7.68895	8.39633	9.16005	9.98261	10.866	11.8117	12.8198	13.6264	14.4541	15.2974	22.6095	33.3247	48.9676
21	702	Singapore	0	0	0	0	0	0	0	0	0	0	0	0.00220251	0.00324346	0.00477125	0.00701018	0.0102856	0.0150678	0.0220336	0.0321518	0.0468	0.0679191	0.0982108	0.141369	0.202313	0.287296	0.403593	0.557892	0.750813	0.959021	1.22431	1.56209	1.99179	2.53795	3.23142	4.11095	5.22503	6.63419	8.41367	10.6565	13.4773	17.0156	21.4405	26.9533	33.79	42.2192	52.5331	65.0244
12	703	Slovakia	0	0	0	0	0	3.59499	17.975	89.8748	139.219	211.23	308.746	304.002	299.074	293.946	288.599	283.011	277.156	271.005	264.52	289.575	312.328	362.762	466.497	671.915	534.638	608.037	855.502	715.989	738.481	761.486	784.997	809.003	833.492	858.447	883.846	909.665	935.873	962.434	989.303	1035.76	1083.82	1133.47	1184.67	1237.34	1266.31	1294.89	1322.93
21	704	Viet Nam	0	0	0	0	0	3.87171	15.5637	62.6005	61.949	71.0079	91.0549	97.8111	105.097	112.952	121.418	130.542	140.373	150.964	162.373	171.289	180.209	234.165	288.09	341.992	395.875	449.746	562.061	674.348	740.852	807.354	873.854	940.353	1006.85	1073.34	1139.84	1206.33	1272.82	1339.3	1405.79	1472.27	1651.01	1829.74	2008.46	2187.18	2365.9	2858.14	3519.25
12	705	Slovenia	0	0	0	0	0	2.19218	10.4451	49.7677	73.336	105.726	146.415	149.219	151.932	154.528	156.98	159.254	161.311	163.102	164.569	165.642	166.232	166.228	165.482	163.8	160.911	156.414	149.681	139.595	143.454	147.345	151.259	155.184	159.108	163.015	166.888	170.706	174.444	178.073	181.56	188.378	195.149	201.803	208.25	214.376	229.889	245.644	261.311
9	706	Somalia	0	0	0	0	0	0	0	0	0	0	0	0	0	0	0	0	0	0	0	0	0	0	0	0	0	0	0	0	0	0	0	0	0	0	0	0	0	0	321.364	324.485	343.258	357.292	371.899	387.102	407.167	428.271	450.469
10	710	South Africa	0	0	0	0	0	0	0	0	0	0	0	0	0	0	0	0	0	0	0	0	0	0	0	0	0	0	110.87	316.772	621.575	609.725	597.871	586.012	574.148	562.28	550.406	538.529	526.646	514.758	502.866	490.97	479.068	467.162	550.003	678.224	899.758	1781.06	2186.67
10	716	Zimbabwe	0	0	0	0	0	0.327277	1.47274	6.62735	9.98711	15.0492	22.6755	25.9265	29.6435	33.8934	38.7525	44.3083	50.6605	57.9234	66.2274	77.8964	89.5756	89.6151	89.6546	89.694	89.7334	179.545	194.892	210.252	213.857	217.953	222.312	226.964	231.944	237.293	243.06	249.303	256.093	263.516	271.678	280.712	290.79	302.133	315.034	329.893	347.271	367.985	393.284
11	724	Spain	0	0	0	1.81045	8.64699	36.2259	146.229	732.605	1430.5	3186.6	3226.07	3428.78	3321.49	3206.7	2903.04	2585.54	2724.1	2864.97	3007.97	3152.88	3599.41	4461.35	6165.18	4578.3	5474.65	7237.15	6878.42	7828.61	8052.31	8282.28	8518.69	8761.69	9011.48	9268.23	9532.12	9803.36	10082.1	10368.6	10663	11401.9	11390	12345.6	13472.3	13960.6	14440	14841.4	15115.3
7	732	Western Sahara	0	0	0	0	0	0	0	0	0	0	0	0	0	0	0	0	0	0	0	0	0	0	0	0	0	0	0	0	0	0	0	0	0	0	0	0	0	0	0	0	0	0	0	0	0	0	0
9	736	Sudan	0	0	0	0	0	13.7014	68.6337	343.93	594.811	1025.94	1765.95	1829.78	1895.88	1964.32	2035.19	2108.57	2184.55	2263.22	2344.68	2531.49	2719.18	2816.89	2915.02	3165.76	3417.66	3670.72	3955.59	4241.75	4278.39	4310.67	4344.57	4380.25	4417.9	4457.73	4500.01	4545.01	4593.11	4644.71	4700.34	4760.62	4826.35	4898.53	4978.44	5067.8	5168.93	5285.1	5421.11
6	740	Suriname	0	0	0	0	0	0	0	0.737486	1.36838	2.48391	4.33064	4.6427	4.97245	5.31991	5.68477	6.06635	6.46344	6.87414	7.29562	7.72379	8.15289	8.57476	8.97788	9.34576	9.65429	9.86686	9.92455	9.72283	10.4704	11.2695	12.1227	13.0325	14.0011	15.0306	16.1227	17.2787	18.4989	19.7832	21.1299	22.1336	23.1468	24.1605	25.1626	26.1372	28.0656	30.0189	31.9505
11	744	Svalbard & Jan Mayen Isl.	0	0	0	0	0	0	0	0	0	0	0	0	0	0	0	0	0	0	0	0	0	0	0	0	0	0	0	0	0	0	0	0	0	0	0	0	0	0	0	0	0	0	0	0	0	0	0
10	748	Swaziland	0	0	0	0	0	0	0	0	0	0	0	0	0	0	0	0	0	0	0	0	0	0	0	0	0	0	0	0	0	0	0	0	0	0	0	0	0	0	20.1719	21.8932	23.7629	25.7938	28	30.3967	33.0005	35.8295	38.9032
11	752	Sweden	0	0	0	0	0	0	0	0.32669	1.63345	16.3345	130.676	287.487	307.283	325.726	342.711	358.116	371.795	383.569	393.222	400.483	405	453.991	496.462	960.094	358.285	395.913	561.753	939.335	970.132	983.311	1089.43	1148.65	1175.79	1261.62	1331.82	1366.09	1410.73	1505.37	1622.99	1840.33	2164.68	2468.05	2866.3	3309.53	3760.41	3932.14	3904.22
11	756	Switzerland	0	0	0	0	0	0.657788	4.93341	29.6005	54.9275	149.579	652.159	641.56	630.53	619.027	607.005	594.408	581.171	567.214	552.441	536.198	518.906	667.17	800.608	1222.75	868.779	1085.92	1252.8	1409.05	1430.92	1452.4	1473.4	1493.82	1513.54	1532.45	1550.4	1567.21	1582.71	1596.67	1608.85	1755.02	1859.62	1956.63	2049.84	2088.55	2150	2144.3	2078.69
17	760	Syrian Arab Rep.	0	0	3.46059	15.5727	70.077	315.346	1419.06	1604.48	1380.28	1656.33	1863.37	2548.32	3484.84	4765.25	3800.86	3031.47	2417.69	1928.08	1537.54	2822.79	1376.32	1463.37	1551.53	1640.77	1321.27	1425.48	1675.2	1696.17	1707.17	1718.18	1729.21	1740.25	1751.3	1762.36	1773.44	1784.53	1795.64	1806.76	1817.89	1829.04	1907.38	1970.24	2035.16	2102.23	2171.5	2453.17	2735.21
15	762	Tajikistan	0	0	0	0	2.54049	8.89173	31.1211	108.924	118.239	125.806	129.175	136.213	143.52	151.085	158.892	166.919	175.134	183.496	191.948	196.408	200.081	202.881	213.228	221.827	228.423	232.668	248.266	258.445	275.144	288.169	301.755	315.919	330.679	346.054	362.061	378.717	396.038	414.039	432.735	452.138	472.26	493.107	514.685	536.998	560.042	583.812	608.293
21	764	Thailand	0	0	0	0	0	1.08169	8.92398	43.8086	50.0618	58.404	142.228	156.278	170.323	184.364	198.405	212.447	226.49	240.536	254.585	268.638	282.694	339.148	395.587	452.015	508.435	564.85	635.38	705.906	711.498	724.667	738.08	751.741	765.655	779.827	794.262	808.964	823.937	839.189	895.127	951.065	1007	1062.94	1118.87	1286.7	1454.51	1778.44	2111.29
8	768	Togo	0	0	0	0	0	1.48168	5.92671	23.7068	32.8827	45.4195	62.5241	71.673	82.1584	94.1752	107.947	123.729	141.815	162.541	186.291	213.507	244.692	280.426	321.371	368.286	422.041	483.631	554.197	635.046	637.338	639.638	641.946	644.262	646.587	648.92	651.261	653.61	655.968	658.334	660.708	666.434	672.21	678.036	683.912	689.838	704.1	718.656	733.513
24	772	Tokelau	0	0	0	0	0	0	0	0	0	0	0	0	0	0	0	0	0	0	0	0	0	0	0	0	0	0	0	0	0	0	0	0	0	0	0	0	0	0	0	0	0	0	0	0	0	0	0
24	776	Tonga	0	0	0	0	0	0	0	0	0	1.33633	1.23171	1.27502	1.31869	1.36252	1.40626	1.44961	1.4922	1.53357	1.57318	1.61031	1.64411	1.67345	1.69691	2.44043	3.4884	4.94584	6.93194	9.54757	9.95139	10.3692	10.801	11.247	11.7072	12.1815	12.6697	13.1715	13.6866	14.2145	14.7543	15.3477	15.9543	16.5727	17.201	17.8372	18.1095	18.3654	18.6015
4	780	Trin. & Tobago	0	0	0	0	0	0	0	0	0	0	0	1.00571e-05	1.97472e-05	3.8732e-05	7.58771e-05	0.000148441	0.000289948	0.000565329	0.00109994	0.0021348	0.00413099	0.0079648	0.0152872	0.0291715	0.0552378	0.103475	0.190746	0.342376	0.506916	0.750132	1.1094	1.63972	2.42188	3.57445	5.27117	7.76616	11.4304	16.8043	24.6729	36.1727	37.9999	25.8443	44.5289	55.0127	64.59	85.9358	102.794
17	784	U.Arab Emirates	0	0	0	0	0	0	0	0	0	0	0	0	0	0	0	0	0	0	0	0	0	0	0	0	0	0	0	0	0	0	0	0	0	0	0	0	0	0	17.0533	17.5231	17.9757	18.404	18.7996	19.1517	19.4714	19.7164	19.8628
7	788	Tunisia	0	0	0	0	19.1868	95.9338	479.669	602.605	576	768	960	1071.14	1180.3	1111.93	1044.54	978.138	912.72	904.84	1065.14	1083.57	1101.5	1037.07	1081.8	1071.95	849.681	841.801	1042.4	826.041	825.756	837.495	849.961	863.235	877.408	892.588	908.906	926.512	945.59	966.362	989.104	1014.16	1041.95	1073.05	1108.18	1148.33	1194.88	1249.81	1316.09
13	792	Turkey	0	0	0	87.3015	261.905	1658.73	2717.92	3699.07	7106.78	10121.7	12547.6	13468.9	14365.3	13203.6	12056.7	10925.5	9810.97	10650.7	11455	12454.6	13401.6	9616.4	11107.2	12498.7	9799.96	10229	12593.3	12725.7	12798.4	12904.5	13008.5	13110.2	13209.1	13304.9	13397.1	13485.3	13568.9	13647.3	13719.6	13785	14160.3	14489.6	14815	15133.8	15442.9	15546.9	15603.6
15	795	Turkmenistan	0	0	0	0	2.21633	7.75717	27.1501	95.0253	106.348	118.314	130.59	139.069	148.081	157.659	167.837	178.648	190.131	202.324	215.268	220.419	225.45	239.574	253.432	267.019	282.899	306.104	354.141	388.728	414.479	437.123	461.004	486.187	512.746	540.754	570.29	601.438	634.286	668.926	705.457	743.98	784.606	827.448	872.627	920.27	970.512	1023.5	1079.37
4	796	Turks & Caicos	0	0	0	0	0	0	0	0	0	0	0	2.73819e-06	5.39901e-06	1.06387e-05	2.09489e-05	4.12197e-05	8.10367e-05	0.000159168	0.000312303	0.000612058	0.00119794	0.00234115	0.00456746	0.00889306	0.0172746	0.0334615	0.0645963	0.124178	0.133789	0.144136	0.155275	0.167265	0.180171	0.19406	0.209008	0.225092	0.242398	0.261017	0.281047	0.28899	0.297137	0.305489	0.314053	0.32283	0.332193	0.3418	0.351652
24	798	Tuvalu	0	0	0	0	0	0	0	0	0	0	0	0.000953656	0.00142315	0.00212362	0.00316858	0.00472734	0.00705228	0.0105197	0.0156904	0.0234005	0.0348956	0.052032	0.0775754	0.115645	0.172378	0.25691	0.382849	0.570447	0.600065	0.63122	0.663991	0.698463	0.734723	0.772865	0.812986	0.855188	0.89958	0.946275	0.995392	1.04997	1.10753	1.16825	1.23229	1.29985	1.34373	1.38909	1.43599
9	800	Uganda	0	0	0	0	0	2.22245	8.17737	30.1227	37.5125	46.7403	58.268	72.9212	91.259	114.208	142.927	178.867	223.844	280.129	350.566	409.464	468.496	551.112	633.914	716.9	800.072	883.427	1031.82	1180.55	1192.06	1203.98	1216.54	1229.81	1243.87	1258.8	1274.71	1291.71	1309.97	1329.64	1350.95	1374.17	1399.62	1427.74	1459.07	1494.35	1534.58	1581.2	1636.31
14	804	Ukraine	0	0	0	0	0	0	59.5903	73.1811	89.8716	110.369	135.54	152.865	172.404	194.441	219.294	247.324	278.937	314.591	354.802	400.152	449.294	709.411	1120.12	1179.08	1241.13	1741.94	2292.03	3216.88	3781.62	4201.8	4668.67	5187.41	5763.79	6084	6422	6778.77	7155.37	7552.89	7972.5	8538.61	9167.63	9979.47	10459.3	11943	13433.6	15830.4	18631.1
12	807	TFYR Macedonia	0	0	0	0	0	1.56139	7.80695	39.0348	60.6012	92.2835	135.843	135.736	135.649	135.451	135.129	134.672	134.065	133.289	132.325	131.149	129.732	133.275	136.147	138.265	139.521	139.776	162.47	153.138	153.648	157.89	162.227	166.659	171.188	175.812	180.532	185.348	190.258	195.263	200.36	216.761	234.453	253.533	274.101	296.263	330.136	367.779	409.592
7	818	Egypt	0	0	0	7.71178	34.5664	155.117	1158.97	1743.65	1500	1600	2400	2468.63	2521.73	2245.9	1985.62	1646.77	1333.82	1423.6	1492.67	1614.4	1705.05	1370.73	1156.85	1237.57	961.529	846.062	928.083	718.729	691.362	664.512	638.181	612.368	587.072	562.295	538.035	514.294	491.071	468.365	511.792	553.147	592.43	629.641	664.78	579.369	647.638	723.588	982.756
11	826	United Kingdom	0	0	0	0	0	1.09387	3.28162	44.3018	123.302	292.903	939.463	1000.95	1039.18	1077.72	1116.35	819.009	533.271	519.897	738.464	1192.8	1614.87	2377.6	3849.71	4970.98	2132.69	2128.65	2719.49	3364.99	3613.2	3861.86	4078.8	4358.08	4629.42	4741.26	4842.88	4928.05	4754.86	4547.43	3975.09	4579.71	4666.54	5527.41	5088.78	4277.69	5601.68	6100.28	6507.25
10	834	U.R. Tanzania	0	0	0	0	0	1.92907	7.7898	31.7357	44.0777	61.751	87.2659	103.901	123.71	147.298	175.387	208.837	248.672	296.112	352.611	411.867	471.26	751.954	1033.3	1315.31	1597.96	1036.91	1260.57	1484.73	1504.9	1522.45	1540.98	1560.6	1581.41	1603.56	1627.21	1652.55	1679.82	1709.28	1741.28	1776.25	1814.7	1857.31	1904.98	1958.87	2020.61	2092.51	2178
2	840	United States	0	0	0	0	0	0	0	0	28.5859	212.738	424.982	445.219	466.42	488.63	511.898	536.275	561.811	588.564	616.591	696.036	775.903	841.558	937.236	1021.35	1142.07	1255.49	593.613	752.547	1041.3	1353.23	1718.7	2108.28	2558.67	3084.88	3723.09	4520.84	5544.23	7865.36	10902.9	15064.9	21296	30418.6	41668.2	59147.4	67314.6	100885	125817
4	850	U.S. Virgin Is.	0	0	0	0	0	0	0	0	0	0	0	4.85114e-05	9.55398e-05	0.000188019	0.000369709	0.000726314	0.00142544	0.00279433	0.00547081	0.0106953	0.0208742	0.0406617	0.0790272	0.153178	0.295941	0.569471	1.09028	2.07369	2.32017	2.59572	2.90372	3.24795	3.63262	4.06242	4.54259	5.07893	5.67794	6.34683	7.09363	7.06057	7.02671	6.99201	6.95646	6.92002	6.5418	6.18322	5.84325
8	854	Burkina Faso	0	0	0	0	0	1.40009	6.30041	28.3519	42.1682	62.7037	93.2178	105.551	119.516	135.327	153.231	173.502	196.455	222.443	251.869	285.187	322.911	365.624	413.987	468.745	530.744	600.943	680.424	770.415	772.918	779.995	787.453	795.331	803.675	812.536	821.977	832.068	842.897	854.567	867.204	880.965	896.045	912.692	931.23	952.087	975.85	1003.35	1035.81
6	858	Uruguay	0	0	0	0	0	0	1.61016	5.36719	5.55432	5.63759	5.53025	6.05206	6.61834	7.23188	7.89538	8.61133	9.38195	10.2089	11.0932	12.0346	13.0314	14.0797	15.1725	16.2981	17.4382	18.5647	19.6346	20.5801	21.5198	22.4993	23.5201	24.5837	25.6914	26.8447	28.0451	29.294	30.593	31.9434	33.3468	34.8044	46.5773	61.5485	81.3117	144.919	207.262	277.573	406.146
15	860	Uzbekistan	0	0	0	0	0	13.4329	47.0151	164.553	200.665	243.435	294.113	316.163	339.856	365.313	392.664	422.05	453.621	487.54	523.98	547.749	571.643	617.959	664.53	711.354	758.43	812.201	930.903	1050.26	1118.57	1181.04	1247.01	1316.66	1390.2	1467.85	1549.83	1636.4	1727.79	1824.3	1926.19	2033.77	2147.36	2267.29	2393.93	2527.63	2668.8	2817.86	2975.24
6	862	Venezuela	0	0	0	0	0	19.5861	65.287	217.623	224.861	227.653	222.227	230.162	238.183	246.257	254.344	262.396	270.352	278.141	285.671	278.189	270.282	279.341	286.628	291.893	294.812	294.94	277.753	322.86	324.245	325.566	326.82	328.002	329.107	330.129	331.062	331.9	332.636	333.263	333.773	404.975	491.167	595.444	721.522	873.851	969.615	1075.23	1203.09
24	876	Wallis & Futuna	0	0	0	0	0	0	0	0	0	0	0	0	0	0	0	0	0	0	0	0	0	0	0.138246	0.20724	0.310667	0.465711	0.69813	1.04654	1.10155	1.15946	1.22041	1.28456	1.35208	1.42315	1.49796	1.5767	1.65958	1.74682	1.83864	1.94067	2.04836	2.16202	2.28199	2.40861	2.49151	2.57727	2.66597
24	882	Samoa, Western	0	0	0	0	0	0	0	0	0	0	0	0.00982784	0.0147769	0.0222178	0.033405	0.0502244	0.0755112	0.113528	0.17068	0.256602	0.385771	0.579952	0.871863	1.31068	1.97034	2.96196	4.45256	6.69322	7.04701	7.41949	7.81166	8.22456	8.65928	9.11698	9.59887	10.1062	10.6404	11.2028	11.7949	12.4529	13.1475	13.8809	14.6551	15.4726	17.4104	19.5908	22.0443
17	887	Yemen	0	0	0	0	0	0	0	0	0	0	0	0	0	0	0	0	0	0	0	0	0	0	0	0	0	0	0	0	0	0	0	0	0	0	0	0	0	0	1275.88	1268.38	1256.54	1255.82	1253.37	1248.95	1242.28	1255.17	1263.26
12	891	Union of Serbia and Montenegro	0	0	0	0	0	3.46601	20.796	124.776	232.866	426.738	757.822	741.628	731.123	720.239	708.946	697.206	684.981	672.223	658.878	697.923	733.714	782.677	2216.91	866.542	651.506	806.617	944.767	899.744	931.023	961.864	992.259	1022.2	1051.68	1080.69	1109.21	1137.25	1164.79	1191.82	1218.33	1244.3	1269.74	1294.62	1609.47	1919.71	2225.24	2525.96	2821.74
10	894	Zambia	0	0	0	0	0	0.748961	3.37033	15.1665	23.7323	36.9593	57.3402	65.7412	75.3707	86.4081	99.059	113.559	130.177	149.224	171.052	201.699	232.521	279.839	327.422	375.27	423.379	471.746	513.275	555.02	562.836	573.749	585.359	597.747	611.004	625.24	640.583	657.188	675.242	694.973	716.663	740.665	767.432	797.55	831.795	871.227	917.33	972.269	1039.35
		total Cropland	0	0	9.97535	1809.61	3918.68	10391	28153.6	48661	72940.9	117254	199078	197598	194924	181426	177620	172325	171168	169775	169805	181365	184975	220455	250331	255817	228045	262475	274916	297042	309191	321819	333373	344711	360000	372348	385427	400326	416220	434449	457427	480948	509066	547107	584594	626143	657355	724092	787526
		total Pasture	0	0	0	378.155	6435.16	19611.3	32841.1	52889.9	85958.6	112083	204170	207917	215812	216155	230855	248838	271308	289529	314365	349543	368293	449748	500775	512012	486368	518001	581908	663592	665775	684762	699446	718281	747254	772563	800889	847561	881895	903545	961952	997252	1.05709e+06	1.11233e+06	1.16266e+06	1.20552e+06	1.21066e+06	1.28122e+06	1.38128e+06
Total cropland estimate, in 1000 ha			-10000	-9000	-8000	-7000	-6000	-5000	-4000	-3000	-2000	-1000	0	100	200	300	400	500	600	700	800	900	1000	1100	1200	1300	1400	1500	1600	1700	1710	1720	1730	1740	1750	1760	1770	1780	1790	1800	1810	1820	1830	1840	1850	1860	1870	1880	1890
	1	Canada	0	0	0	0	0	0	0	0	0	0	0	0	0	0	0	0	0	0	0	0	0	0	0	0	0	0	0	20.5032	26.552	34.4206	44.6666	58.021	75.4433	98.1935	127.928	220.272	297.921	434.376	593.86	815.682	1125.67	1563.05	2177.98	3540.64	4908.12	6088.28	7635.68
	2	USA	0	0	0	0	0	0	0	0	28.5859	212.738	424.982	445.219	466.42	488.63	511.899	536.275	561.812	588.565	616.593	696.041	775.911	841.575	937.269	1021.41	1142.21	1255.76	594.156	753.633	1042.48	1354.5	1720.08	2109.77	2560.28	3086.63	3724.97	4522.88	5546.43	7867.75	10905.5	15067.6	21298.8	30421.4	41671.1	59150.5	67317.8	100888	125821
	3	Mexico	0	0	0	0	0	27.9674	90.3553	245.59	1535.65	1962.15	2559.16	2754.57	2964.91	3191.32	3435.02	3697.33	3979.67	4283.58	4610.7	5420.51	6261.4	7240.78	8257.46	9312.56	10407.2	11542.6	471.11	1922.83	2126.65	2337.98	2557.05	2784.06	3019.27	3262.92	3515.24	3776.48	4046.92	4326.82	4616.44	4916.08	5226.01	5546.54	5877.96	6220.59	6574.76	6938.63	8527.49
	4	Rest Central America	0	0	0	0	0	36.4622	125.405	432.958	468.295	504.445	532.893	582.564	635.887	694.992	760.723	834.091	916.312	1008.86	1113.56	1344.44	1583.6	1740.13	1918.96	2126.61	2372.39	2670.06	1088.26	825.607	843.565	865.502	892.151	924.412	963.4	1010.5	1067.47	1143.41	1232	1336.01	1460.97	1597.57	1874.91	2068.62	2321.91	2539.49	2776.74	3043.68	3341.01
	5	Brazil	0	0	0	0	0	0	8.45924	16.9185	33.837	67.6739	135.348	144.637	154.564	165.173	176.509	188.624	201.57	215.405	230.189	234.27	238.403	264.111	289.818	315.526	341.234	393.641	104.472	136.565	148.326	161.225	175.267	190.717	207.893	226.816	247.895	271.509	298.13	328.361	406.501	499.224	633.968	769.588	906.239	1044.1	1183.6	1316.72	1635.61
	6	Rest South America	0	0	0	0	27.7572	253.638	875.42	3086.45	3411.35	3761.49	4033.73	4221.41	4414.45	4612.98	4816.6	5024.72	5236.53	5450.99	5666.67	6100.47	6492.51	6892.23	7232.72	7509.39	7705.35	11020.9	7434.06	6379.63	6722.54	7078.58	7448.41	7832.76	8232.49	8648.58	9082.15	9534.46	10007	10501.4	9700.89	9197.43	10159.9	11033.2	11984.8	12840.5	13298.7	14511.9	16245.8
	7	Northern Africa	0	0	0	7.71178	164.918	775.27	4117.51	5299.64	4760.66	5781.55	7440.18	7632.68	7813.3	7368.95	6943.76	6532.1	6151.43	6234.91	6469.48	6810.84	7103.35	6261.38	5653.93	5744.87	4944.52	4671.67	5971.44	4717.87	4740.48	4828.91	4917.68	5006.87	5096.57	5186.88	5277.95	5369.91	5462.96	5557.31	5718.86	5934.53	6623.61	7308.39	7989.59	8549.73	9264.41	9989.61	10945.4
	8	Western Africa	0	0	0	0	0	36.6363	155.169	656.97	940.707	1350.26	1945.13	2283.42	2695.15	3199.84	3822.42	4595.27	5560.62	6773.59	8306.44	9520.57	10789.3	11924.8	13131.1	14819.5	16688	18634.8	21883.2	25789.2	25938.6	26043.9	26166.8	26307.8	26467.5	26646.9	26847.3	27070	27317.2	27591.1	27894.8	28243.8	28630.4	29061	29544.3	30091.6	30765.9	31544.2	32461
	9	Eastern Africa	0	0	0	0	0	22.9737	105.865	492.482	792.851	1290.78	2121.16	2267.12	2434.67	2629.11	2856.88	3126.31	3448.43	3838.21	4316.58	4664.05	5011.74	5335.8	5659.34	6136.5	6613.78	7126.47	7780.75	8435.12	8545.89	8639.12	8736.15	8837.4	8943.35	9054.54	9171.65	9295.45	9426.88	9567.06	10041.9	10207.2	10953	11702.9	12469.8	13269.2	14093.1	14958.7	15868.5
	10	Southern Africa	0	0	0	0	0	4.2866	18.0851	77.0108	111.565	163.086	240.484	286.949	343.484	412.551	497.283	601.677	730.853	891.398	1091.8	1345.64	1599.85	2097.49	2595.76	3094.66	3646.66	3444.82	4014.87	4679.87	4288.57	4339.05	4392.2	4448.32	4507.74	4570.87	4638.19	4710.24	4787.72	4871.45	5391.59	5510.51	5641.43	5851.57	6182.38	6589.48	7077.61	8263.66	9024.44
	11	Western Europe	0	0	0	11.2277	174.09	281.012	690.366	2084.08	4887.49	10591.4	28717.5	29060.6	28729.1	26121.4	23452.8	19109.9	15362.2	16943.9	19445.6	23114.4	26360.3	33694.8	46648.4	60268.2	38789	48874.5	57648.2	61813.8	63402	64480.8	65590.3	66699.7	70633.2	71639.1	72575.1	73586.8	74411.8	75705.1	77079.7	80254.8	82413.6	86257.6	90647.5	91261.2	93635	95431.4	96744.2
	12	Central Europe	0	0	0	0.731452	3.65726	69.574	344.691	1392.09	2709	4409.02	6651.76	6976.33	7159.1	6894.5	6696.22	6429.37	6156.36	6510.74	6839.88	7484.64	8078.25	8874.49	11908.9	14018.3	11877.9	14187.2	16120.8	16879.3	18049.5	18882.9	19745.8	20640.1	21567.5	22530.3	23530.1	24569	25648.9	26772.1	27944	29167.2	31344.2	33469.9	35591.2	38596.3	41433.6	45314.9	49002.6
	13	Turkey	0	0	0	87.3015	261.905	1658.73	2717.92	3699.07	7106.78	10121.7	12547.6	13468.9	14365.3	13203.6	12056.7	10925.5	9810.97	10650.7	11455	12454.6	13401.6	9616.4	11107.2	12498.7	9799.96	10229	12593.3	12725.7	12798.4	12904.5	13008.5	13110.2	13209.1	13304.9	13397.1	13485.3	13568.9	13647.3	13719.6	13785	14160.3	14489.6	14815	15133.8	15442.9	15546.9	15603.6
	14	Ukraine +	0	0	0	0	0	28.5152	159.393	422.492	468.331	511.784	545.167	598.362	652.734	708.468	765.77	794.708	827.022	891.842	959.292	1029.66	1100.21	1652.87	2482.23	2483.6	2482.49	3303.28	4110.36	5432.75	5973.14	6550.48	7184.87	7882.04	8648.31	9170.42	9722.87	10307.2	10924.9	11577.5	12266.7	13117	14045.2	15171.1	15979.8	17806.9	19654.2	22420.4	25601
	15	Asia-Stan	0	0	0	0	7.7308	40.4907	142.417	496.886	565.755	638.958	712.913	759.998	810.07	863.305	919.888	980.016	1043.89	1111.73	1183.76	1225.59	1266.69	1348.55	1437.84	1525.41	1613.78	1714.34	1943.05	2153.1	2302.8	2445.37	2600.2	2769.12	2954.32	3158.5	3384.92	3637.61	3921.53	4242.77	4608.86	5029.14	5515.15	6081.25	6745.25	7529.3	8460.99	9574.66	10913.1
	16	Russia +	0	0	0	0	7.41944	125.817	213.303	481.663	536.79	1719.4	1953.41	2168.08	2383.71	2600.26	2817.69	2845.07	2873.13	3092.59	3312.4	3523	3730.69	5566.22	8142.05	8642.4	8282.97	10554.2	13019.9	14668.3	15847.3	17648	19453.5	21264.2	23139.7	24982.1	26837.1	28706.7	30593.9	32502.2	34369	36515.8	38891.3	45746	49431.5	56538.5	61174.3	70193.5	80454.2
	17	Middle East	0	0	9.97535	47.3048	280.349	1429.79	7640.69	8772.53	7394.64	8058.07	9222.29	10346.1	11817.7	13714.5	12203.8	10968.2	9987.42	9368.85	8886.48	9865.75	8122.02	8038.33	7848.08	6140.39	5748.84	5945.75	7044.08	6609.03	6758.65	6837.17	6917.12	6998.55	7081.49	7165.98	7252.07	7339.79	7429.18	7520.3	10191.3	10295.9	10683.9	11052.8	11420.2	11785.5	12219.5	13601.7	14961.4
	18	India +	0	0	0	1622.47	2856.44	5095.12	9251.33	17377.2	30156.6	52568.7	93100.1	89484.6	85848.9	81994.2	78183.9	74442.3	70788.6	67376.4	64059.3	61029.5	58099.1	55151.4	52335.5	48571.1	46527.6	44292.1	44023.9	49193.8	52414.9	55849.6	59532.9	63482.8	67718.4	72260.2	77129.8	82350.4	87946.5	93944.5	100372	107522	114781	123342	131455	133232	135040	137289	139086
	19	Korea	0	0	0	0	0	7.09514	26.6068	99.7753	115.755	131.419	143.408	187.025	243.99	318.374	415.467	542.12	707.173	921.975	1200.99	1311.84	1411.17	1633.77	2092.56	1499.31	1658.92	1780.08	2058.45	2323.94	2523.58	2652.48	2786.73	2926.34	3071.29	3221.5	3376.84	3537.08	3701.88	3870.81	4043.23	4218.35	4183.76	4098.82	4008.37	3934.27	3851.42	3743.74	3632.49
	20	China +	0	0	0	30.8218	125.558	469.683	1348.49	3010.96	6214.23	12275.8	24350.7	22071.5	18970	10020.9	13854.1	17448.4	23841.4	20263.7	16332.8	20088.4	19230.6	47341	55276.2	44205.1	40268.6	52409.6	57236.8	59931.4	62584.9	65517	66876.2	67550.1	68749.2	69537	70492.3	72408.5	74690.3	76837.9	80238.4	82792.8	84013.2	84518	85017	85349.5	85247.8	85674.7	88069.3
	21	Southeastern Asia	0	0	0	0	0	11.677	54.3488	224.129	254.515	485.03	820.107	890.741	963.08	1037.58	1114.76	1195.34	1280.37	1371.4	1470.67	1549.94	1629.03	2000.4	2371.58	2516.49	2905.04	3293	3868.45	4503.87	4657.66	4819.16	4980.99	5143.17	5305.75	5468.76	5632.26	5796.31	5960.99	6126.39	6462.13	6802.2	7362.48	7995.51	8670.04	9778.23	10884.9	12476.7	15049.9
	22	Indonesia +	0	0	0	2.03317	8.85399	16.2621	63.3552	271.517	418.45	604.196	822.095	875.695	934.767	1000	1072.19	1152.21	1241.04	1339.8	1449.71	1572.13	1708.57	1923.7	2170.21	2452.26	3117.17	3740.64	4107.07	4547.09	4658.53	4772.93	4890.34	5010.83	5134.46	5441.75	5759.67	6088.51	6428.57	6780.13	6804.13	6810.3	6800.15	6775.03	6736.19	8035.11	9193.09	10221	11128.3
	23	Japan	0	0	0	0	0	0	4.43972	19.9787	27.8564	38.0464	50.0698	82.0903	112.958	174.301	233.146	342.638	447.001	630	770	960	960	992	801.879	878.596	1069.27	1341.17	1740.34	2528.58	2722.1	2697.35	2672.14	2646.45	2620.24	2575.62	2530.81	2485.79	2440.55	2395.07	2433.82	2470.15	2503.96	2535.13	2563.51	2618.43	2669.35	2814.39	3012.48
	24	Oceania	0	0	0	0	0	0	0	0.667437	1.23844	6.39565	8.26415	9.17771	9.99375	10.8825	11.8557	12.9244	14.1024	15.4074	16.8631	18.5014	20.3657	22.5162	31.1728	35.6902	41.2938	48.3332	57.236	68.4414	71.9814	75.7645	79.8217	84.1902	88.9148	94.0496	99.6601	105.826	119.797	134.993	149.49	162.66	184.459	230.227	368.539	680.702	1157.01	2214.31	2732.85
	25	Greenland	0	0	0	0	0	0	0	0	0	0	0	0	0	0	0	0	0	0	0	0	0	0	0	0	0	0	0	0	0	0	0	0	0	0	0	0	0	0	0	0	0	0	0	0	0	0	0
	26	Antarctica	0	0	0	0	0	0	0	0	0	0	0	0	0	0	0	0	0	0	0	0	0	0	0	0	0	0	0	0	0	0	0	0	0	0	0	0	0	0	0	0	0	0	0	0	0	0	0
			-10000	-9000	-8000	-7000	-6000	-5000	-4000	-3000	-2000	-1000	0	100	200	300	400	500	600	700	800	900	1000	1100	1200	1300	1400	1500	1600	1700	1710	1720	1730	1740	1750	1760	1770	1780	1790	1800	1810	1820	1830	1840	1850	1860	1870	1880	1890
		HYDE, S-curve	0	0	9.97535	1809.61	3918.68	10391	28153.6	48661	72940.9	117254	199078	197598	194924	181426	177619	172325	171168	169775	169805	181365	184975	220455	250330	255817	228044	262474	274914	297040	309189	321817	333370	344708	359996	372343	385421	400319	416211	434439	457414	480933	509050	547089	584576	626115	657324	724061	787498
		Williams' theory
		Williams' theory - 50%
		Williams' theory + 50%
		Nevle and Bird (2008)
		FAO
		Pongratz et al (2008), lower																			80000
		Pongratz et al (2008)																			136000			197000			233000			401000
		Pongratz et al (2008), upper																			220000
Total cropland estimate, in Mha			-10000	-9000	-8000	-7000	-6000	-5000	-4000	-3000	-2000	-1000	0	100	200	300	400	500	600	700	800	900	1000	1100	1200	1300	1400	1500	1600	1700	1710	1720	1730	1740	1750	1760	1770	1780	1790	1800	1810	1820	1830	1840	1850	1860	1870	1880	1890
	1	Canada	0	0	0	0	0	0	0	0	0	0	0	0	0	0	0	0	0	0	0	0	0	0	0	0	0	0	0	0.0205032	0.026552	0.0344206	0.0446666	0.058021	0.0754433	0.0981935	0.127928	0.220272	0.297921	0.434376	0.59386	0.815682	1.12567	1.56305	2.17798	3.54064	4.90812	6.08828	7.63568
	2	USA	0	0	0	0	0	0	0	0	0.0285859	0.212738	0.424982	0.445219	0.46642	0.48863	0.511899	0.536275	0.561812	0.588565	0.616593	0.696041	0.775911	0.841575	0.937269	1.02141	1.14221	1.25576	0.594156	0.753633	1.04248	1.3545	1.72008	2.10977	2.56028	3.08663	3.72497	4.52288	5.54643	7.86775	10.9055	15.0676	21.2988	30.4214	41.6711	59.1505	67.3178	100.888	125.821
	3	Mexico	0	0	0	0	0	0.0279674	0.0903553	0.24559	1.53565	1.96215	2.55916	2.75457	2.96491	3.19132	3.43502	3.69733	3.97967	4.28358	4.6107	5.42051	6.2614	7.24078	8.25746	9.31256	10.4072	11.5426	0.47111	1.92283	2.12665	2.33798	2.55705	2.78406	3.01927	3.26292	3.51524	3.77648	4.04692	4.32682	4.61644	4.91608	5.22601	5.54654	5.87796	6.22059	6.57476	6.93863	8.52749
	4	Rest Central America	0	0	0	0	0	0.0364622	0.125405	0.432958	0.468295	0.504445	0.532893	0.582564	0.635887	0.694992	0.760723	0.834091	0.916312	1.00886	1.11356	1.34444	1.5836	1.74013	1.91896	2.12661	2.37239	2.67006	1.08826	0.825607	0.843565	0.865502	0.892151	0.924412	0.9634	1.0105	1.06747	1.14341	1.232	1.33601	1.46097	1.59757	1.87491	2.06862	2.32191	2.53949	2.77674	3.04368	3.34101
	5	Brazil	0	0	0	0	0	0	0.00845924	0.0169185	0.033837	0.0676739	0.135348	0.144637	0.154564	0.165173	0.176509	0.188624	0.20157	0.215405	0.230189	0.23427	0.238403	0.264111	0.289818	0.315526	0.341234	0.393641	0.104472	0.136565	0.148326	0.161225	0.175267	0.190717	0.207893	0.226816	0.247895	0.271509	0.29813	0.328361	0.406501	0.499224	0.633968	0.769588	0.906239	1.0441	1.1836	1.31672	1.63561
	6	Rest South America	0	0	0	0	0.0277572	0.253638	0.87542	3.08645	3.41135	3.76149	4.03373	4.22141	4.41445	4.61298	4.8166	5.02472	5.23653	5.45099	5.66667	6.10047	6.49251	6.89223	7.23272	7.50939	7.70535	11.0209	7.43406	6.37963	6.72254	7.07858	7.44841	7.83276	8.23249	8.64858	9.08215	9.53446	10.007	10.5014	9.70089	9.19743	10.1599	11.0332	11.9848	12.8405	13.2987	14.5119	16.2458
	7	Northern Africa	0	0	0	0.00771178	0.164918	0.77527	4.11751	5.29964	4.76066	5.78155	7.44018	7.63268	7.8133	7.36895	6.94376	6.5321	6.15143	6.23491	6.46948	6.81084	7.10335	6.26138	5.65393	5.74487	4.94452	4.67167	5.97144	4.71787	4.74048	4.82891	4.91768	5.00687	5.09657	5.18688	5.27795	5.36991	5.46296	5.55731	5.71886	5.93453	6.62361	7.30839	7.98959	8.54973	9.26441	9.98961	10.9454
	8	Western Africa	0	0	0	0	0	0.0366363	0.155169	0.65697	0.940707	1.35026	1.94513	2.28342	2.69515	3.19984	3.82242	4.59527	5.56062	6.77359	8.30644	9.52057	10.7893	11.9248	13.1311	14.8195	16.688	18.6348	21.8832	25.7892	25.9386	26.0439	26.1668	26.3078	26.4675	26.6469	26.8473	27.07	27.3172	27.5911	27.8948	28.2438	28.6304	29.061	29.5443	30.0916	30.7659	31.5442	32.461
	9	Eastern Africa	0	0	0	0	0	0.0229737	0.105865	0.492482	0.792851	1.29078	2.12116	2.26712	2.43467	2.62911	2.85688	3.12631	3.44843	3.83821	4.31658	4.66405	5.01174	5.3358	5.65934	6.1365	6.61378	7.12647	7.78075	8.43512	8.54589	8.63912	8.73615	8.8374	8.94335	9.05454	9.17165	9.29545	9.42688	9.56706	10.0419	10.2072	10.953	11.7029	12.4698	13.2692	14.0931	14.9587	15.8685
	10	Southern Africa	0	0	0	0	0	0.0042866	0.0180851	0.0770108	0.111565	0.163086	0.240484	0.286949	0.343484	0.412551	0.497283	0.601677	0.730853	0.891398	1.0918	1.34564	1.59985	2.09749	2.59576	3.09466	3.64666	3.44482	4.01487	4.67987	4.28857	4.33905	4.3922	4.44832	4.50774	4.57087	4.63819	4.71024	4.78772	4.87145	5.39159	5.51051	5.64143	5.85157	6.18238	6.58948	7.07761	8.26366	9.02444
	11	Western Europe	0	0	0	0.0112277	0.17409	0.281012	0.690366	2.08408	4.88749	10.5914	28.7175	29.0606	28.7291	26.1214	23.4528	19.1099	15.3622	16.9439	19.4456	23.1144	26.3603	33.6948	46.6484	60.2682	38.789	48.8745	57.6482	61.8138	63.402	64.4808	65.5903	66.6997	70.6332	71.6391	72.5751	73.5868	74.4118	75.7051	77.0797	80.2548	82.4136	86.2576	90.6475	91.2612	93.635	95.4314	96.7442
	12	Central Europe	0	0	0	0.000731452	0.00365726	0.069574	0.344691	1.39209	2.709	4.40902	6.65176	6.97633	7.1591	6.8945	6.69622	6.42937	6.15636	6.51074	6.83988	7.48464	8.07825	8.87449	11.9089	14.0183	11.8779	14.1872	16.1208	16.8793	18.0495	18.8829	19.7458	20.6401	21.5675	22.5303	23.5301	24.569	25.6489	26.7721	27.944	29.1672	31.3442	33.4699	35.5912	38.5963	41.4336	45.3149	49.0026
	13	Turkey	0	0	0	0.0873015	0.261905	1.65873	2.71792	3.69907	7.10678	10.1217	12.5476	13.4689	14.3653	13.2036	12.0567	10.9255	9.81097	10.6507	11.455	12.4546	13.4016	9.6164	11.1072	12.4987	9.79996	10.229	12.5933	12.7257	12.7984	12.9045	13.0085	13.1102	13.2091	13.3049	13.3971	13.4853	13.5689	13.6473	13.7196	13.785	14.1603	14.4896	14.815	15.1338	15.4429	15.5469	15.6036
	14	Ukraine +	0	0	0	0	0	0.0285152	0.159393	0.422492	0.468331	0.511784	0.545167	0.598362	0.652734	0.708468	0.76577	0.794708	0.827022	0.891842	0.959292	1.02966	1.10021	1.65287	2.48223	2.4836	2.48249	3.30328	4.11036	5.43275	5.97314	6.55048	7.18487	7.88204	8.64831	9.17042	9.72287	10.3072	10.9249	11.5775	12.2667	13.117	14.0452	15.1711	15.9798	17.8069	19.6542	22.4204	25.601
	15	Asia-Stan	0	0	0	0	0.0077308	0.0404907	0.142417	0.496886	0.565755	0.638958	0.712913	0.759998	0.81007	0.863305	0.919888	0.980016	1.04389	1.11173	1.18376	1.22559	1.26669	1.34855	1.43784	1.52541	1.61378	1.71434	1.94305	2.1531	2.3028	2.44537	2.6002	2.76912	2.95432	3.1585	3.38492	3.63761	3.92153	4.24277	4.60886	5.02914	5.51515	6.08125	6.74525	7.5293	8.46099	9.57466	10.9131
	16	Russia +	0	0	0	0	0.00741944	0.125817	0.213303	0.481663	0.53679	1.7194	1.95341	2.16808	2.38371	2.60026	2.81769	2.84507	2.87313	3.09259	3.3124	3.523	3.73069	5.56622	8.14205	8.6424	8.28297	10.5542	13.0199	14.6683	15.8473	17.648	19.4535	21.2642	23.1397	24.9821	26.8371	28.7067	30.5939	32.5022	34.369	36.5158	38.8913	45.746	49.4315	56.5385	61.1743	70.1935	80.4542
	17	Middle East	0	0	0.00997535	0.0473048	0.280349	1.42979	7.64069	8.77253	7.39464	8.05807	9.22229	10.3461	11.8177	13.7145	12.2038	10.9682	9.98742	9.36885	8.88648	9.86575	8.12202	8.03833	7.84808	6.14039	5.74884	5.94575	7.04408	6.60903	6.75865	6.83717	6.91712	6.99855	7.08149	7.16598	7.25207	7.33979	7.42918	7.5203	10.1913	10.2959	10.6839	11.0528	11.4202	11.7855	12.2195	13.6017	14.9614
	18	India +	0	0	0	1.62247	2.85644	5.09512	9.25133	17.3772	30.1566	52.5687	93.1001	89.4846	85.8489	81.9942	78.1839	74.4423	70.7886	67.3764	64.0593	61.0295	58.0991	55.1514	52.3355	48.5711	46.5276	44.2921	44.0239	49.1938	52.4149	55.8496	59.5329	63.4828	67.7184	72.2602	77.1298	82.3504	87.9465	93.9445	100.372	107.522	114.781	123.342	131.455	133.232	135.04	137.289	139.086
	19	Korea	0	0	0	0	0	0.00709514	0.0266068	0.0997753	0.115755	0.131419	0.143408	0.187025	0.24399	0.318374	0.415467	0.54212	0.707173	0.921975	1.20099	1.31184	1.41117	1.63377	2.09256	1.49931	1.65892	1.78008	2.05845	2.32394	2.52358	2.65248	2.78673	2.92634	3.07129	3.2215	3.37684	3.53708	3.70188	3.87081	4.04323	4.21835	4.18376	4.09882	4.00837	3.93427	3.85142	3.74374	3.63249
	20	China +	0	0	0	0.0308218	0.125558	0.469683	1.34849	3.01096	6.21423	12.2758	24.3507	22.0715	18.97	10.0209	13.8541	17.4484	23.8414	20.2637	16.3328	20.0884	19.2306	47.341	55.2762	44.2051	40.2686	52.4096	57.2368	59.9314	62.5849	65.517	66.8762	67.5501	68.7492	69.537	70.4923	72.4085	74.6903	76.8379	80.2384	82.7928	84.0132	84.518	85.017	85.3495	85.2478	85.6747	88.0693
	21	Southeastern Asia	0	0	0	0	0	0.011677	0.0543488	0.224129	0.254515	0.48503	0.820107	0.890741	0.96308	1.03758	1.11476	1.19534	1.28037	1.3714	1.47067	1.54994	1.62903	2.0004	2.37158	2.51649	2.90504	3.293	3.86845	4.50387	4.65766	4.81916	4.98099	5.14317	5.30575	5.46876	5.63226	5.79631	5.96099	6.12639	6.46213	6.8022	7.36248	7.99551	8.67004	9.77823	10.8849	12.4767	15.0499
	22	Indonesia +	0	0	0	0.00203317	0.00885399	0.0162621	0.0633552	0.271517	0.41845	0.604196	0.822095	0.875695	0.934767	1	1.07219	1.15221	1.24104	1.3398	1.44971	1.57213	1.70857	1.9237	2.17021	2.45226	3.11717	3.74064	4.10707	4.54709	4.65853	4.77293	4.89034	5.01083	5.13446	5.44175	5.75967	6.08851	6.42857	6.78013	6.80413	6.8103	6.80015	6.77503	6.73619	8.03511	9.19309	10.221	11.1283
	23	Japan	0	0	0	0	0	0	0.00443972	0.0199787	0.0278564	0.0380464	0.0500698	0.0820903	0.112958	0.174301	0.233146	0.342638	0.447001	0.63	0.77	0.96	0.96	0.992	0.801879	0.878596	1.06927	1.34117	1.74034	2.52858	2.7221	2.69735	2.67214	2.64645	2.62024	2.57562	2.53081	2.48579	2.44055	2.39507	2.43382	2.47015	2.50396	2.53513	2.56351	2.61843	2.66935	2.81439	3.01248
	24	Oceania	0	0	0	0	0	0	0	0.000667437	0.00123844	0.00639565	0.00826415	0.00917771	0.00999375	0.0108825	0.0118557	0.0129244	0.0141024	0.0154074	0.0168631	0.0185014	0.0203657	0.0225162	0.0311728	0.0356902	0.0412938	0.0483332	0.057236	0.0684414	0.0719814	0.0757645	0.0798217	0.0841902	0.0889148	0.0940496	0.0996601	0.105826	0.119797	0.134993	0.14949	0.16266	0.184459	0.230227	0.368539	0.680702	1.15701	2.21431	2.73285
	25	Greenland	0	0	0	0	0	0	0	0	0	0	0	0	0	0	0	0	0	0	0	0	0	0	0	0	0	0	0	0	0	0	0	0	0	0	0	0	0	0	0	0	0	0	0	0	0	0	0
	26	Antarctica	0	0	0	0	0	0	0	0	0	0	0	0	0	0	0	0	0	0	0	0	0	0	0	0	0	0	0	0	0	0	0	0	0	0	0	0	0	0	0	0	0	0	0	0	0	0	0
		total	0	0	0.00997535	1.80961	3.91868	10.391	28.1536	48.661	72.9409	117.254	199.078	197.598	194.924	181.426	177.619	172.325	171.168	169.775	169.805	181.365	184.975	220.455	250.33	255.817	228.044	262.474	274.914	297.04	309.189	321.817	333.37	344.708	359.996	372.343	385.421	400.319	416.211	434.439	457.414	480.933	509.05	547.089	584.576	626.115	657.324	724.061	787.498
		Houghton et al (1983)																												264
	1	North America	0	0	0	0	0	0	0	0	0.0285859	0.212738	0.424982	0.445219	0.46642	0.48863	0.511899	0.536275	0.561812	0.588565	0.616593	0.696041	0.775911	0.841575	0.937269	1.02141	1.14221	1.25576	0.594156	0.774137	1.06903	1.38892	1.76474	2.16779	2.63573	3.18482	3.8529	4.74315	5.84436	8.30213	11.4993	15.8832	22.4244	31.9845	43.8491	62.6911	72.2259	106.977	133.457
	2	Europe	0	0	0	0.0119591	0.177747	0.350586	1.03506	3.47617	7.5965	15.0004	35.3692	36.0369	35.8882	33.0159	30.149	25.5393	21.5186	23.4546	26.2855	30.599	34.4386	42.5693	58.5573	74.2865	50.6669	63.0617	73.7689	78.6931	81.4515	83.3637	85.3361	87.3398	92.2007	94.1694	96.1052	98.1558	100.061	102.477	105.024	109.422	113.758	119.728	126.239	129.858	135.069	140.746	145.747
	3	USSR	0	0	0	0	0.0151502	0.194822	0.515114	1.40104	1.57088	2.87014	3.21149	3.52644	3.84651	4.17204	4.50335	4.61979	4.74405	5.09617	5.45545	5.77825	6.0976	8.56764	12.0621	12.6514	12.3792	15.5719	19.0734	22.2542	24.1233	26.6438	29.2386	31.9154	34.7423	37.3111	39.9449	42.6515	45.4403	48.3225	51.2445	54.662	58.4516	66.9984	72.1566	81.8747	89.2895	102.189	116.968
	4	Pacific Dev.	0	0	0	0	0	0	0.00443972	0.0206462	0.0290948	0.044442	0.0583339	0.091268	0.122952	0.185183	0.245002	0.355562	0.461104	0.645407	0.786863	0.978501	0.980366	1.01452	0.833052	0.914287	1.11057	1.3895	1.79757	2.59702	2.79408	2.77311	2.75196	2.73064	2.70916	2.66967	2.63047	2.59162	2.56035	2.53006	2.58331	2.63281	2.68842	2.76536	2.93205	3.29913	3.82635	5.0287	5.74533
	5	China	0	0	0	0.0308218	0.125558	0.476778	1.3751	3.11074	6.32998	12.4072	24.4941	22.2585	19.214	10.3392	14.2696	17.9906	24.5486	21.1857	17.5338	21.4003	20.6418	48.9748	57.3688	45.7044	41.9275	54.1896	59.2952	62.2553	65.1085	68.1695	69.6629	70.4764	71.8205	72.7585	73.8692	75.9456	78.3922	80.7087	84.2816	87.0112	88.1969	88.6169	89.0253	89.2837	89.0992	89.4184	91.7017
	6	Latin America	0	0	0	0	0.0277572	0.318068	1.09964	3.78191	5.44914	6.29576	7.26113	7.70319	8.16981	8.66447	9.18885	9.74476	10.3341	10.9588	11.6211	13.0997	14.5759	16.1373	17.699	19.2641	20.8262	25.6273	9.0979	9.26463	9.84109	10.4433	11.0729	11.732	12.4231	13.1488	13.9127	14.7259	15.584	16.4926	16.1848	16.2103	17.8948	19.418	21.0909	22.6447	23.8338	25.8109	29.7499
	7	N.Africa_M.East	0	0	0.00997535	0.142318	0.707171	3.86379	14.4761	17.7712	19.2621	23.9614	29.21	31.4477	33.9964	34.2871	31.2043	28.4258	25.9498	26.2545	26.8109	29.1312	28.6269	23.9161	24.6092	24.3839	20.4933	20.8464	25.6088	24.0526	24.2975	24.5706	24.8433	25.1156	25.3871	25.6578	25.9271	26.195	26.4611	26.7249	29.6298	30.0155	31.4678	32.8508	34.2247	35.4691	36.9268	39.1381	41.5103
	8	Tropical Africa	0	0	0	0	0	0.0638965	0.279119	1.22646	1.84512	2.80413	4.30677	4.83749	5.4733	6.2415	7.17657	8.32326	9.73991	11.5032	13.7148	15.5303	17.4009	19.3581	21.3862	24.0507	26.9484	29.2061	33.6788	38.9042	38.7731	39.0221	39.2951	39.5935	39.9186	40.2723	40.6571	41.0757	41.5318	42.0296	43.3283	43.9615	45.2248	46.6155	48.1964	49.9503	51.9366	54.7665	57.3539
	9	South Asia	0	0	0	1.62247	2.85644	5.09512	9.25133	17.3772	30.1566	52.5687	93.1001	89.4846	85.8489	81.9942	78.1839	74.4423	70.7886	67.3764	64.0593	61.0295	58.0991	55.1514	52.3355	48.5711	46.5276	44.2921	44.0239	49.1938	52.4149	55.8496	59.5329	63.4828	67.7184	72.2602	77.1298	82.3504	87.9465	93.9445	100.372	107.522	114.781	123.342	131.455	133.232	135.04	137.289	139.086
	10	SE Asia	0	0	0	0.00203317	0.00885399	0.0279391	0.117704	0.495646	0.672965	1.08923	1.6422	1.76644	1.89785	2.03759	2.18695	2.34754	2.52141	2.7112	2.92037	3.12207	3.3376	3.9241	4.54179	4.96875	6.0222	7.03363	7.97552	9.05097	9.3162	9.59209	9.87133	10.154	10.4402	10.9105	11.3919	11.8848	12.3896	12.9065	13.2663	13.6125	14.1626	14.7705	15.4062	17.8133	20.078	22.6977	26.1782
			0	0	0.00997535	1.80961	3.91868	10.391	28.1536	48.661	72.9409	117.254	199.078	197.598	194.924	181.426	177.619	172.325	171.168	169.775	169.805	181.365	184.975	220.455	250.33	255.817	228.044	262.474	274.914	297.04	309.189	321.817	333.37	344.708	359.996	372.343	385.421	400.319	416.211	434.439	457.414	480.933	509.05	547.089	584.576	626.115	657.324	724.061	787.498
		1700 estimate (Mha)	HYDE	HOUGHTON		diff
		North America	0.774137	3		-2.22586
		Europe	78.6931	67		11.6931
		USSR	22.2542	33		-10.7458
		Pacific Dev.	2.59702	5		-2.40298
		China	62.2553	29		33.2553
		Latin America	9.26463	7		2.26463
		N.Africa_M.East	24.0526	19		5.05262
		Tropical Africa	38.9042	44		-5.09583
		South Asia	49.1938	53		-3.80623
		SE Asia	9.05097	4		5.05097
		total	297.04	264		33.0399
						Cereals cultivated in South/Central Asia 8,500 B.C.
						Rice, Millet culitvated in N. China around 7,000 B.C.
						Maize in Central/South America aroun 4,000 B.C.
Best estimate
Total cropland estimate, in Mkm2			-10000	-9000	-8000	-7000	-6000	-5000	-4000	-3000	-2000	-1000	0	100	200	300	400	500	600	700	800	900	1000	1100	1200	1300	1400	1500	1600	1700	1710	1720	1730	1740	1750	1760	1770	1780	1790	1800	1810	1820	1830	1840	1850	1860	1870	1880	1890
	1	Canada	0	0	0	0	0	0	0	0	0	0	0	0	0	0	0	0	0	0	0	0	0	0	0	0	0	0	0	0.000205032	0.00026552	0.000344206	0.000446666	0.00058021	0.000754433	0.000981935	0.00127928	0.00220272	0.00297921	0.00434376	0.0059386	0.00815682	0.0112567	0.0156305	0.0217798	0.0354064	0.0490812	0.0608828	0.0763568
	2	USA	0	0	0	0	0	0	0	0	0.000285859	0.00212738	0.00424982	0.00445219	0.0046642	0.0048863	0.00511899	0.00536275	0.00561812	0.00588565	0.00616593	0.00696041	0.00775911	0.00841575	0.00937269	0.0102141	0.0114221	0.0125576	0.00594156	0.00753633	0.0104248	0.013545	0.0172008	0.0210977	0.0256028	0.0308663	0.0372497	0.0452288	0.0554643	0.0786775	0.109055	0.150676	0.212988	0.304214	0.416711	0.591505	0.673178	1.00888	1.25821
	3	Mexico	0	0	0	0	0	0.000279674	0.000903553	0.0024559	0.0153565	0.0196215	0.0255916	0.0275457	0.0296491	0.0319132	0.0343502	0.0369733	0.0397967	0.0428358	0.046107	0.0542051	0.062614	0.0724078	0.0825746	0.0931256	0.104072	0.115426	0.0047111	0.0192283	0.0212665	0.0233798	0.0255705	0.0278406	0.0301927	0.0326292	0.0351524	0.0377648	0.0404692	0.0432682	0.0461644	0.0491608	0.0522601	0.0554654	0.0587796	0.0622059	0.0657476	0.0693863	0.0852749
	4	Rest Central America	0	0	0	0	0	0.000364622	0.00125405	0.00432958	0.00468295	0.00504445	0.00532893	0.00582564	0.00635887	0.00694992	0.00760723	0.00834091	0.00916312	0.0100886	0.0111356	0.0134444	0.015836	0.0174013	0.0191896	0.0212661	0.0237239	0.0267006	0.0108826	0.00825607	0.00843565	0.00865502	0.00892151	0.00924412	0.009634	0.010105	0.0106747	0.0114341	0.01232	0.0133601	0.0146097	0.0159757	0.0187491	0.0206862	0.0232191	0.0253949	0.0277674	0.0304368	0.0334101
	5	Brazil	0	0	0	0	0	0	8.45924e-05	0.000169185	0.00033837	0.000676739	0.00135348	0.00144637	0.00154564	0.00165173	0.00176509	0.00188624	0.0020157	0.00215405	0.00230189	0.0023427	0.00238403	0.00264111	0.00289818	0.00315526	0.00341234	0.00393641	0.00104472	0.00136565	0.00148326	0.00161225	0.00175267	0.00190717	0.00207893	0.00226816	0.00247895	0.00271509	0.0029813	0.00328361	0.00406501	0.00499224	0.00633968	0.00769588	0.00906239	0.010441	0.011836	0.0131672	0.0163561
	6	Rest South America	0	0	0	0	0.000277572	0.00253638	0.0087542	0.0308645	0.0341135	0.0376149	0.0403373	0.0422141	0.0441445	0.0461298	0.048166	0.0502472	0.0523653	0.0545099	0.0566667	0.0610047	0.0649251	0.0689223	0.0723272	0.0750939	0.0770535	0.110209	0.0743406	0.0637963	0.0672254	0.0707858	0.0744841	0.0783276	0.0823249	0.0864858	0.0908215	0.0953446	0.10007	0.105014	0.0970089	0.0919743	0.101599	0.110332	0.119848	0.128405	0.132987	0.145119	0.162458
	7	Northern Africa	0	0	0	7.71178e-05	0.00164918	0.0077527	0.0411751	0.0529964	0.0476066	0.0578155	0.0744018	0.0763268	0.078133	0.0736895	0.0694376	0.065321	0.0615143	0.0623491	0.0646948	0.0681084	0.0710335	0.0626138	0.0565393	0.0574487	0.0494452	0.0467167	0.0597144	0.0471787	0.0474048	0.0482891	0.0491768	0.0500687	0.0509657	0.0518688	0.0527795	0.0536991	0.0546296	0.0555731	0.0571886	0.0593453	0.0662361	0.0730839	0.0798959	0.0854973	0.0926441	0.0998961	0.109454
	8	Western Africa	0	0	0	0	0	0.000366363	0.00155169	0.0065697	0.00940707	0.0135026	0.0194513	0.0228342	0.0269515	0.0319984	0.0382242	0.0459527	0.0556062	0.0677359	0.0830644	0.0952057	0.107893	0.119248	0.131311	0.148195	0.16688	0.186348	0.218832	0.257892	0.259386	0.260439	0.261668	0.263078	0.264675	0.266469	0.268473	0.2707	0.273172	0.275911	0.278948	0.282438	0.286304	0.29061	0.295443	0.300916	0.307659	0.315442	0.32461
	9	Eastern Africa	0	0	0	0	0	0.000229737	0.00105865	0.00492482	0.00792851	0.0129078	0.0212116	0.0226712	0.0243467	0.0262911	0.0285688	0.0312631	0.0344843	0.0383821	0.0431658	0.0466405	0.0501174	0.053358	0.0565934	0.061365	0.0661378	0.0712647	0.0778075	0.0843512	0.0854589	0.0863912	0.0873615	0.088374	0.0894335	0.0905454	0.0917165	0.0929545	0.0942688	0.0956706	0.100419	0.102072	0.10953	0.117029	0.124698	0.132692	0.140931	0.149587	0.158685
	10	Southern Africa	0	0	0	0	0	4.2866e-05	0.000180851	0.000770108	0.00111565	0.00163086	0.00240484	0.00286949	0.00343484	0.00412551	0.00497283	0.00601677	0.00730853	0.00891398	0.010918	0.0134564	0.0159985	0.0209749	0.0259576	0.0309466	0.0364666	0.0344482	0.0401487	0.0467987	0.0428857	0.0433905	0.043922	0.0444832	0.0450774	0.0457087	0.0463819	0.0471024	0.0478772	0.0487145	0.0539159	0.0551051	0.0564143	0.0585157	0.0618238	0.0658948	0.0707761	0.0826366	0.0902444
	11	Western Europe	0	0	0	0.000112277	0.0017409	0.00281012	0.00690366	0.0208408	0.0488749	0.105914	0.287175	0.290606	0.287291	0.261214	0.234528	0.191099	0.153622	0.169439	0.194456	0.231144	0.263603	0.336948	0.466484	0.602682	0.38789	0.488745	0.576482	0.618138	0.63402	0.644808	0.655903	0.666997	0.706332	0.716391	0.725751	0.735868	0.744118	0.757051	0.770797	0.802548	0.824136	0.862576	0.906475	0.912612	0.93635	0.954314	0.967442
	12	Central Europe	0	0	0	7.31452e-06	3.65726e-05	0.00069574	0.00344691	0.0139209	0.02709	0.0440902	0.0665176	0.0697633	0.071591	0.068945	0.0669622	0.0642937	0.0615636	0.0651074	0.0683988	0.0748464	0.0807825	0.0887449	0.119089	0.140183	0.118779	0.141872	0.161208	0.168793	0.180495	0.188829	0.197458	0.206401	0.215675	0.225303	0.235301	0.24569	0.256489	0.267721	0.27944	0.291672	0.313442	0.334699	0.355912	0.385963	0.414336	0.453149	0.490026
	13	Turkey	0	0	0	0.000873015	0.00261905	0.0165873	0.0271792	0.0369907	0.0710678	0.101217	0.125476	0.134689	0.143653	0.132036	0.120567	0.109255	0.0981097	0.106507	0.11455	0.124546	0.134016	0.096164	0.111072	0.124987	0.0979996	0.10229	0.125933	0.127257	0.127984	0.129045	0.130085	0.131102	0.132091	0.133049	0.133971	0.134853	0.135689	0.136473	0.137196	0.13785	0.141603	0.144896	0.14815	0.151338	0.154429	0.155469	0.156036
	14	Ukraine +	0	0	0	0	0	0.000285152	0.00159393	0.00422492	0.00468331	0.00511784	0.00545167	0.00598362	0.00652734	0.00708468	0.0076577	0.00794708	0.00827022	0.00891842	0.00959292	0.0102966	0.0110021	0.0165287	0.0248223	0.024836	0.0248249	0.0330328	0.0411036	0.0543275	0.0597314	0.0655048	0.0718487	0.0788204	0.0864831	0.0917042	0.0972287	0.103072	0.109249	0.115775	0.122667	0.13117	0.140452	0.151711	0.159798	0.178069	0.196542	0.224204	0.25601
	15	Asia-Stan	0	0	0	0	7.7308e-05	0.000404907	0.00142417	0.00496886	0.00565755	0.00638958	0.00712913	0.00759998	0.0081007	0.00863305	0.00919888	0.00980016	0.0104389	0.0111173	0.0118376	0.0122559	0.0126669	0.0134855	0.0143784	0.0152541	0.0161378	0.0171434	0.0194305	0.021531	0.023028	0.0244537	0.026002	0.0276912	0.0295432	0.031585	0.0338492	0.0363761	0.0392153	0.0424277	0.0460886	0.0502914	0.0551515	0.0608125	0.0674525	0.075293	0.0846099	0.0957466	0.109131
	16	Russia +	0	0	0	0	7.41944e-05	0.00125817	0.00213303	0.00481663	0.0053679	0.017194	0.0195341	0.0216808	0.0238371	0.0260026	0.0281769	0.0284507	0.0287313	0.0309259	0.033124	0.03523	0.0373069	0.0556622	0.0814205	0.086424	0.0828297	0.105542	0.130199	0.146683	0.158473	0.17648	0.194535	0.212642	0.231397	0.249821	0.268371	0.287067	0.305939	0.325022	0.34369	0.365158	0.388913	0.45746	0.494315	0.565385	0.611743	0.701935	0.804542
	17	Middle East	0	0	9.97535e-05	0.000473048	0.00280349	0.0142979	0.0764069	0.0877253	0.0739464	0.0805807	0.0922229	0.103461	0.118177	0.137145	0.122038	0.109682	0.0998742	0.0936885	0.0888648	0.0986575	0.0812202	0.0803833	0.0784808	0.0614039	0.0574884	0.0594575	0.0704408	0.0660903	0.0675865	0.0683717	0.0691712	0.0699855	0.0708149	0.0716598	0.0725207	0.0733979	0.0742918	0.075203	0.101913	0.102959	0.106839	0.110528	0.114202	0.117855	0.122195	0.136017	0.149614
	18	India +	0	0	0	0.0162247	0.0285644	0.0509512	0.0925133	0.173772	0.301566	0.525687	0.931001	0.894846	0.858489	0.819942	0.781839	0.744423	0.707886	0.673764	0.640593	0.610295	0.580991	0.551514	0.523355	0.485711	0.465276	0.442921	0.440239	0.491938	0.524149	0.558496	0.595329	0.634828	0.677184	0.722602	0.771298	0.823504	0.879465	0.939445	1.00372	1.07522	1.14781	1.23342	1.31455	1.33232	1.3504	1.37289	1.39086
	19	Korea	0	0	0	0	0	7.09514e-05	0.000266068	0.000997753	0.00115755	0.00131419	0.00143408	0.00187025	0.0024399	0.00318374	0.00415467	0.0054212	0.00707173	0.00921975	0.0120099	0.0131184	0.0141117	0.0163377	0.0209256	0.0149931	0.0165892	0.0178008	0.0205845	0.0232394	0.0252358	0.0265248	0.0278673	0.0292634	0.0307129	0.032215	0.0337684	0.0353708	0.0370188	0.0387081	0.0404323	0.0421835	0.0418376	0.0409882	0.0400837	0.0393427	0.0385142	0.0374374	0.0363249
	20	China +	0	0	0	0.000308218	0.00125558	0.00469683	0.0134849	0.0301096	0.0621423	0.122758	0.243507	0.220715	0.1897	0.100209	0.138541	0.174484	0.238414	0.202637	0.163328	0.200884	0.192306	0.47341	0.552762	0.442051	0.402686	0.524096	0.572368	0.599314	0.625849	0.65517	0.668762	0.675501	0.687492	0.69537	0.704923	0.724085	0.746903	0.768379	0.802384	0.827928	0.840132	0.84518	0.85017	0.853495	0.852478	0.856747	0.880693
	21	Southeastern Asia	0	0	0	0	0	0.00011677	0.000543488	0.00224129	0.00254515	0.0048503	0.00820107	0.00890741	0.0096308	0.0103758	0.0111476	0.0119534	0.0128037	0.013714	0.0147067	0.0154994	0.0162903	0.020004	0.0237158	0.0251649	0.0290504	0.03293	0.0386845	0.0450387	0.0465766	0.0481916	0.0498099	0.0514317	0.0530575	0.0546876	0.0563226	0.0579631	0.0596099	0.0612639	0.0646213	0.068022	0.0736248	0.0799551	0.0867004	0.0977823	0.108849	0.124767	0.150499
	22	Indonesia +	0	0	0	2.03317e-05	8.85399e-05	0.000162621	0.000633552	0.00271517	0.0041845	0.00604196	0.00822095	0.00875695	0.00934767	0.01	0.0107219	0.0115221	0.0124104	0.013398	0.0144971	0.0157213	0.0170857	0.019237	0.0217021	0.0245226	0.0311717	0.0374064	0.0410707	0.0454709	0.0465853	0.0477293	0.0489034	0.0501083	0.0513446	0.0544175	0.0575967	0.0608851	0.0642857	0.0678013	0.0680413	0.068103	0.0680015	0.0677503	0.0673619	0.0803511	0.0919309	0.10221	0.111283
	23	Japan	0	0	0	0	0	0	4.43972e-05	0.000199787	0.000278564	0.000380464	0.000500698	0.000820903	0.00112958	0.00174301	0.00233146	0.00342638	0.00447001	0.0063	0.0077	0.0096	0.0096	0.00992	0.00801879	0.00878596	0.0106927	0.0134117	0.0174034	0.0252858	0.027221	0.0269735	0.0267214	0.0264645	0.0262024	0.0257562	0.0253081	0.0248579	0.0244055	0.0239507	0.0243382	0.0247015	0.0250396	0.0253513	0.0256351	0.0261843	0.0266935	0.0281439	0.0301248
	24	Oceania	0	0	0	0	0	0	0	6.67437e-06	1.23844e-05	6.39565e-05	8.26415e-05	9.17771e-05	9.99375e-05	0.000108825	0.000118557	0.000129244	0.000141024	0.000154074	0.000168631	0.000185014	0.000203657	0.000225162	0.000311728	0.000356902	0.000412938	0.000483332	0.00057236	0.000684414	0.000719814	0.000757645	0.000798217	0.000841902	0.000889148	0.000940496	0.000996601	0.00105826	0.00119797	0.00134993	0.0014949	0.0016266	0.00184459	0.00230227	0.00368539	0.00680702	0.0115701	0.0221431	0.0273285
	25	Greenland	0	0	0	0	0	0	0	0	0	0	0	0	0	0	0	0	0	0	0	0	0	0	0	0	0	0	0	0	0	0	0	0	0	0	0	0	0	0	0	0	0	0	0	0	0	0	0
	26	Antarctica	0	0	0	0	0	0	0	0	0	0	0	0	0	0	0	0	0	0	0	0	0	0	0	0	0	0	0	0	0	0	0	0	0	0	0	0	0	0	0	0	0	0	0	0	0	0	0
		total	0	0	9.97535e-05	0.0180961	0.0391868	0.10391	0.281536	0.48661	0.729409	1.17254	1.99078	1.97598	1.94924	1.81426	1.77619	1.72325	1.71168	1.69775	1.69805	1.81365	1.84975	2.20455	2.5033	2.55817	2.28044	2.62474	2.74914	2.9704	3.09189	3.21817	3.3337	3.44708	3.59996	3.72343	3.85421	4.00319	4.16211	4.34439	4.57414	4.80933	5.0905	5.47089	5.84576	6.26115	6.57324	7.24061	7.87498
	1	North America	0	0	0	0	0	0	0	0	0.000285859	0.00212738	0.00424982	0.00445219	0.0046642	0.0048863	0.00511899	0.00536275	0.00561812	0.00588565	0.00616593	0.00696041	0.00775911	0.00841575	0.00937269	0.0102141	0.0114221	0.0125576	0.00594156	0.00774137	0.0106903	0.0138892	0.0176474	0.0216779	0.0263573	0.0318482	0.038529	0.0474315	0.0584436	0.0830213	0.114993	0.158832	0.224244	0.319845	0.438491	0.626911	0.722259	1.06977	1.33457
	2	Europe	0	0	0	0.000119591	0.00177747	0.00350586	0.0103506	0.0347617	0.075965	0.150004	0.353692	0.360369	0.358882	0.330159	0.30149	0.255393	0.215186	0.234546	0.262855	0.30599	0.344386	0.425693	0.585573	0.742865	0.506669	0.630617	0.737689	0.786931	0.814515	0.833637	0.853361	0.873398	0.922007	0.941694	0.961052	0.981558	1.00061	1.02477	1.05024	1.09422	1.13758	1.19728	1.26239	1.29858	1.35069	1.40746	1.45747
	3	USSR	0	0	0	0	0.000151502	0.00194822	0.00515114	0.0140104	0.0157088	0.0287014	0.0321149	0.0352644	0.0384651	0.0417204	0.0450335	0.0461979	0.0474405	0.0509617	0.0545545	0.0577825	0.060976	0.0856764	0.120621	0.126514	0.123792	0.155719	0.190734	0.222542	0.241233	0.266438	0.292386	0.319154	0.347423	0.373111	0.399449	0.426515	0.454403	0.483225	0.512445	0.54662	0.584516	0.669984	0.721566	0.818747	0.892895	1.02189	1.16968
	4	Pacific Dev.	0	0	0	0	0	0	4.43972e-05	0.000206462	0.000290948	0.00044442	0.000583339	0.00091268	0.00122952	0.00185183	0.00245002	0.00355562	0.00461104	0.00645407	0.00786863	0.00978501	0.00980366	0.0101452	0.00833052	0.00914287	0.0111057	0.013895	0.0179757	0.0259702	0.0279408	0.0277311	0.0275196	0.0273064	0.0270916	0.0266967	0.0263047	0.0259162	0.0256035	0.0253006	0.0258331	0.0263281	0.0268842	0.0276536	0.0293205	0.0329913	0.0382635	0.050287	0.0574533
	5	China	0	0	0	0.000308218	0.00125558	0.00476778	0.013751	0.0311074	0.0632998	0.124072	0.244941	0.222585	0.19214	0.103392	0.142696	0.179906	0.245486	0.211857	0.175338	0.214003	0.206418	0.489748	0.573688	0.457044	0.419275	0.541896	0.592952	0.622553	0.651085	0.681695	0.696629	0.704764	0.718205	0.727585	0.738692	0.759456	0.783922	0.807087	0.842816	0.870112	0.881969	0.886169	0.890253	0.892837	0.890992	0.894184	0.917017
	6	Latin America	0	0	0	0	0.000277572	0.00318068	0.0109964	0.0378191	0.0544914	0.0629576	0.0726113	0.0770319	0.0816981	0.0866447	0.0918885	0.0974476	0.103341	0.109588	0.116211	0.130997	0.145759	0.161373	0.17699	0.192641	0.208262	0.256273	0.090979	0.0926463	0.0984109	0.104433	0.110729	0.11732	0.124231	0.131488	0.139127	0.147259	0.15584	0.164926	0.161848	0.162103	0.178948	0.19418	0.210909	0.226447	0.238338	0.258109	0.297499
	7	N.Africa_M.East	0	0	9.97535e-05	0.00142318	0.00707171	0.0386379	0.144761	0.177712	0.192621	0.239614	0.2921	0.314477	0.339964	0.342871	0.312043	0.284258	0.259498	0.262545	0.268109	0.291312	0.286269	0.239161	0.246092	0.243839	0.204933	0.208464	0.256088	0.240526	0.242975	0.245706	0.248433	0.251156	0.253871	0.256578	0.259271	0.26195	0.264611	0.267249	0.296298	0.300155	0.314678	0.328508	0.342247	0.354691	0.369268	0.391381	0.415103
	8	Tropical Africa	0	0	0	0	0	0.000638965	0.00279119	0.0122646	0.0184512	0.0280413	0.0430677	0.0483749	0.054733	0.062415	0.0717657	0.0832326	0.0973991	0.115032	0.137148	0.155303	0.174009	0.193581	0.213862	0.240507	0.269484	0.292061	0.336788	0.389042	0.387731	0.390221	0.392951	0.395935	0.399186	0.402723	0.406571	0.410757	0.415318	0.420296	0.433283	0.439615	0.452248	0.466155	0.481964	0.499503	0.519366	0.547665	0.573539
	9	South Asia	0	0	0	0.0162247	0.0285644	0.0509512	0.0925133	0.173772	0.301566	0.525687	0.931001	0.894846	0.858489	0.819942	0.781839	0.744423	0.707886	0.673764	0.640593	0.610295	0.580991	0.551514	0.523355	0.485711	0.465276	0.442921	0.440239	0.491938	0.524149	0.558496	0.595329	0.634828	0.677184	0.722602	0.771298	0.823504	0.879465	0.939445	1.00372	1.07522	1.14781	1.23342	1.31455	1.33232	1.3504	1.37289	1.39086
	10	SE Asia	0	0	0	2.03317e-05	8.85399e-05	0.000279391	0.00117704	0.00495646	0.00672965	0.0108923	0.016422	0.0176644	0.0189785	0.0203759	0.0218695	0.0234754	0.0252141	0.027112	0.0292037	0.0312207	0.033376	0.039241	0.0454179	0.0496875	0.060222	0.0703363	0.0797552	0.0905097	0.093162	0.0959209	0.0987133	0.10154	0.104402	0.109105	0.113919	0.118848	0.123896	0.129065	0.132663	0.136125	0.141626	0.147705	0.154062	0.178133	0.20078	0.226977	0.261782
		total	0	0	9.97535e-05	0.0180961	0.0391868	0.10391	0.281536	0.48661	0.729409	1.17254	1.99078	1.97598	1.94924	1.81426	1.77619	1.72325	1.71168	1.69775	1.69805	1.81365	1.84975	2.20455	2.5033	2.55817	2.28044	2.62474	2.74914	2.9704	3.09189	3.21817	3.3337	3.44708	3.59996	3.72343	3.85421	4.00319	4.16211	4.34439	4.57414	4.80933	5.0905	5.47089	5.84576	6.26115	6.57324	7.24061	7.87498
		global share				7000 BC:	see maps in BC ordner, Greece, Levant, East China						0.0137295	0.0136274	0.0134431	0.0125121	0.0122496	0.0118845	0.0118047	0.0117086	0.0117107	0.0125079	0.0127569	0.0152038	0.0172641	0.0176425	0.0157272	0.0181016	0.0189596	0.0204855	0.0213234	0.0221942	0.022991	0.023773	0.0248273	0.0256788	0.0265808	0.0276082	0.0287042	0.0299613	0.0315458	0.0331678	0.0351069	0.0377303	0.0403156	0.0431804	0.0453327	0.0499352	0.0543102
									4000 BC: see maps of Olofsson and Hickler (2007); Mexico, Peru, W.europe, C.Europe, Levant,C.Asia, Northern part of Western Africa, (Indo)china, indonesia
											2000 BC: central america, Northern part Latin America, California, texas, louisiana, caribbean
													0 AD	Southern part of Latin America, Southern Africa still no agric !
Voor GEB paper table			-10000	-9000	-8000	-7000	-6000	-5000	-4000	-3000	-2000	-1000	0	100	200	300	400	500	600	700	800	900	1000	1100	1200	1300	1400	1500	1600	1700	1710	1720	1730	1740	1750	1760	1770	1780	1790	1800	1810	1820	1830	1840	1850	1860	1870	1880	1890
		Americas	0	0	0	0	0.000277572	0.00318068	0.0109964	0.0378191	0.0547772	0.065085	0.0768611	0.0814841	0.0863623	0.091531	0.0970075	0.10281	0.108959	0.115474	0.122377	0.137957	0.153518	0.169788	0.186362	0.202855	0.219684	0.26883	0.0969206	0.100388	0.109101	0.118322	0.128376	0.138997	0.150588	0.163336	0.177656	0.19469	0.214284	0.247947	0.276841	0.320936	0.403192	0.514024	0.6494	0.853358	0.960597	1.32787	1.63206
		Europe incl. Turkey	0	0	0	0.000992607	0.00439652	0.0200931	0.0375298	0.0717524	0.147033	0.251221	0.479168	0.495058	0.502535	0.462195	0.422058	0.364648	0.313296	0.341053	0.377404	0.430536	0.478401	0.521857	0.696645	0.867852	0.604669	0.732907	0.863622	0.914188	0.9425	0.962682	0.983447	1.0045	1.0541	1.07474	1.09502	1.11641	1.1363	1.16124	1.18743	1.23207	1.27918	1.34217	1.41054	1.44991	1.50511	1.56293	1.6135
		former USSR	0	0	0	0	0.000151502	0.00194822	0.00515114	0.0140104	0.0157088	0.0287014	0.0321149	0.0352644	0.0384651	0.0417204	0.0450335	0.0461979	0.0474405	0.0509617	0.0545545	0.0577825	0.060976	0.0856764	0.120621	0.126514	0.123792	0.155719	0.190734	0.222542	0.241233	0.266438	0.292386	0.319154	0.347423	0.373111	0.399449	0.426515	0.454403	0.483225	0.512445	0.54662	0.584516	0.669984	0.721566	0.818747	0.892895	1.02189	1.16968
		Asia+Pacific	0	0	9.97535e-05	0.0170263	0.032712	0.0702963	0.183893	0.297767	0.445832	0.741677	1.28517	1.23947	1.18901	1.08271	1.07089	1.06104	1.08307	1.01288	0.941868	0.963961	0.911809	1.17103	1.22927	1.06299	1.01337	1.12851	1.20136	1.29706	1.36392	1.43221	1.48736	1.53842	1.5977	1.65765	1.72273	1.80112	1.88718	1.9761	2.10695	2.21075	2.30513	2.40547	2.50239	2.55413	2.60263	2.68036	2.77673
		Africa	0	0	0	7.71178e-05	0.00164918	0.00839166	0.0439663	0.065261	0.0660578	0.0858568	0.11747	0.124702	0.132866	0.136104	0.141203	0.148554	0.158913	0.177381	0.201843	0.223411	0.245043	0.256194	0.270401	0.297956	0.318929	0.338777	0.396503	0.43622	0.435136	0.43851	0.442128	0.446003	0.450151	0.454592	0.45935	0.464456	0.469947	0.475869	0.490472	0.498961	0.518484	0.539239	0.56186	0.585	0.61201	0.647561	0.682993
		total	0	0	9.97535e-05	0.0180961	0.0391868	0.10391	0.281536	0.48661	0.729409	1.17254	1.99078	1.97598	1.94924	1.81426	1.77619	1.72325	1.71168	1.69775	1.69805	1.81365	1.84975	2.20455	2.5033	2.55817	2.28044	2.62474	2.74914	2.9704	3.09189	3.21817	3.3337	3.44708	3.59996	3.72343	3.85421	4.00319	4.16211	4.34439	4.57414	4.80933	5.0905	5.47089	5.84576	6.26115	6.57324	7.24061	7.87498
Best estimate
Cropland per capita (ha/cap)			-10000	-9000	-8000	-7000	-6000	-5000	-4000	-3000	-2000	-1000	0	100	200	300	400	500	600	700	800	900	1000	1100	1200	1300	1400	1500	1600	1700	1710	1720	1730	1740	1750	1760	1770	1780	1790	1800	1810	1820	1830	1840	1850	1860	1870	1880	1890
	1	Canada	0	0	0	0	0	0	0	0	0	0	0	0	0	0	0	0	0	0	0	0	0	0	0	0	0	0	0	1.20607e-05	1.55275e-05	2.0012e-05	2.58188e-05	3.33454e-05	4.31104e-05	5.57917e-05	7.22755e-05	0.000123748	0.000166436	0.00024132	0.0003281	0.000448177	0.000615118	0.000849482	0.00117729	0.00190357	0.00262467	0.00323845	0.00404004
	2	USA	0	0	0	0	0	0	0	0	0.712839	4.77383	8.58079	8.23856	7.90935	7.59248	7.28723	6.99282	6.70844	6.43316	6.16593	6.96041	7.75911	7.01313	6.69478	6.38383	6.34561	6.2788	2.97078	3.76817	4.58665	5.12507	5.58084	5.8536	6.05879	6.21501	6.36749	6.55019	6.79249	8.13392	9.50292	10.9572	12.8966	15.3039	17.3789	17.4092	17.2945	22.238	24.6738
	3	Mexico	0	0	0	0	0	0.0705839	0.205234	0.502052	2.82537	3.24905	3.81385	3.91848	4.02598	4.13642	4.24989	4.36646	4.4862	4.60916	4.73536	4.94804	5.14317	5.52096	5.68352	5.92478	5.98312	6.11538	0.604455	2.07009	1.54696	1.28418	1.12819	1.02642	0.955974	0.905294	0.867913	0.83993	0.818853	0.684897	0.56438	0.463659	0.377522	0.307809	0.247018	0.195042	0.168723	0.137164	0.135072
	4	Rest Central America	0	0	0	0	0	0.0148366	0.0408222	0.11275	0.0975622	0.0840749	0.071053	0.0736345	0.0761925	0.0789418	0.0819123	0.0851394	0.0886657	0.0925423	0.0968315	0.101467	0.105573	0.10236	0.100998	0.101267	0.103147	0.106803	1.08826	0.206402	0.194563	0.185278	0.178179	0.173023	0.16966	0.168023	0.168111	0.17103	0.17547	0.181602	0.189922	0.198996	0.224168	0.237785	0.256984	0.270998	0.286068	0.303087	0.28196
	5	Brazil	0	0	0	0	0	0	0.033221	0.0574999	0.0982414	0.16501	0.270844	0.261161	0.251345	0.241379	0.231248	0.220938	0.210434	0.199717	0.188767	0.155333	0.130533	0.127368	0.122059	0.114646	0.105113	0.100232	0.0563654	0.0820273	0.0853677	0.0884681	0.0911943	0.0935423	0.09551	0.0969411	0.0978481	0.0977241	0.0972542	0.0964546	0.106403	0.117963	0.129682	0.140252	0.146073	0.15278	0.155853	0.155726	0.173471
	6	Rest South America	0	0	0	0	0.0225378	0.15691	0.412622	1.1084	0.933392	0.784148	0.640687	0.625797	0.610785	0.595705	0.580533	0.565242	0.549799	0.534161	0.518276	0.547925	0.572699	0.548421	0.52418	0.499664	0.473894	0.588159	8.37404	11.5729	10.6008	9.65308	8.7379	7.86259	7.03345	6.25556	5.53263	4.86697	4.25951	3.7099	2.67648	2.06626	1.79737	1.60789	1.4832	1.37927	1.26014	1.23608	1.11397
	7	Northern Africa	0	0	0	0.0070679	0.12853	0.512376	2.30147	2.49873	1.88849	1.89534	1.99386	1.9213	1.84744	1.63661	1.44846	1.27961	1.13145	1.07649	1.04817	0.998329	0.950341	0.763391	0.63315	0.594526	0.475601	0.419732	1.08683	0.881589	0.8703	0.871048	0.871601	0.871974	0.872184	0.87225	0.872191	0.872031	0.871794	0.87151	0.879428	0.850009	0.803635	0.775687	0.728795	0.663219	0.646022	0.596249	0.526483
	8	Western Africa	0	0	0	0	0	0.0728759	0.174348	0.325281	0.300514	0.292679	0.237206	0.263111	0.294152	0.36353	0.452467	0.576553	0.741472	0.848197	0.962506	0.995352	1.02755	1.25523	1.47539	1.52855	1.95864	2.24507	1.9893	2.77282	2.78225	2.77219	2.76393	2.75745	2.75276	2.7499	2.74889	2.74982	2.75279	2.75792	2.63478	2.51945	2.27377	2.07932	1.92285	1.90976	1.76243	1.63742	1.42322
	9	Eastern Africa	0	0	0	0	0	0.0443162	0.144271	0.471586	0.530516	0.600121	0.681304	0.617437	0.559122	0.506175	0.458337	0.415356	0.377001	0.343073	0.313432	0.295353	0.280005	0.26884	0.258277	0.248347	0.237262	0.228819	0.214542	0.199255	0.201045	0.202739	0.204357	0.205902	0.207379	0.208794	0.21015	0.211452	0.212707	0.213918	0.222276	0.223303	0.236543	0.249152	0.261292	0.27314	0.283765	0.29375	0.302748
	10	Southern Africa	0	0	0	0	0	0.0122565	0.0346817	0.0976939	0.0924209	0.087177	0.08205	0.0902518	0.0989336	0.108025	0.117422	0.126987	0.136528	0.145788	0.154418	0.17592	0.194436	0.235315	0.270412	0.295941	0.322277	0.281034	0.299469	0.32149	0.290345	0.290211	0.290116	0.290064	0.290055	0.290091	0.290174	0.290307	0.290434	0.290645	0.31612	0.317198	0.298482	0.286097	0.280546	0.276815	0.277771	0.30343	0.310815
	11	Western Europe	0	0	0	0.299083	3.33297	3.80809	6.50808	13.4015	20.9722	29.6004	50.925	44.3263	37.5385	29.113	22.1955	15.2851	10.3342	9.53774	9.11171	8.91528	8.63582	8.48847	9.54346	10.3765	5.69271	7.44304	7.67098	7.15241	8.39049	8.40682	8.42144	8.42996	8.78322	8.75999	8.7214	8.68457	8.61798	8.59655	8.57313	8.73307	8.76085	8.77278	8.68485	8.17453	7.83846	6.97495	6.5123
	12	Central Europe	0	0	0	0.00355652	0.0123078	0.154503	0.402231	0.840821	0.650384	0.506931	0.262767	0.264673	0.261946	0.267356	0.276145	0.311469	0.364601	0.349929	0.331703	0.324684	0.314884	0.284693	0.281586	0.227515	0.291788	0.265383	0.229622	0.211959	0.212731	0.213673	0.214509	0.215658	0.217051	0.2186	0.220376	0.221536	0.222183	0.223733	0.223363	0.217181	0.214636	0.211909	0.213569	0.218889	0.222016	0.225255	0.227659
	13	Turkey	0	0	0	1.06114	1.49163	5.76129	5.66377	4.5533	4.39644	3.60733	2.47343	2.5429	2.59901	2.40777	2.21577	2.10106	1.97808	2.01112	2.03343	1.97898	1.92694	1.22298	0.994185	0.955335	0.858081	0.729629	0.724122	0.663998	0.62708	0.601249	0.576567	0.552921	0.530212	0.508311	0.487183	0.466755	0.44696	0.42774	0.408916	0.389938	0.367336	0.345931	0.327808	0.304559	0.284272	0.256651	0.233183
	14	Ukraine region	0	0	0	0	0	0.045024	0.149431	0.281661	0.15611	0.11373	0.0908612	0.0920557	0.0932476	0.108995	0.127628	0.144492	0.165404	0.162153	0.159882	0.15542	0.151753	0.311863	0.397157	0.344945	0.428015	0.528525	0.513795	0.639147	0.694607	0.750863	0.811815	0.877866	0.949449	0.992387	1.03714	1.08376	1.1323	1.1828	1.2353	1.30207	1.34344	1.40277	1.42829	1.53854	1.64155	1.83241	2.05051
	15	Asia-Stan	0	0	0	0	0.0319615	0.143486	0.432585	1.29365	1.26253	1.22219	1.16885	1.1539	1.14099	1.12982	1.12009	1.12693	1.13286	1.1241	1.11623	1.07862	1.04512	0.741776	0.52726	0.559373	0.591779	0.471491	0.427514	0.355297	0.349333	0.349375	0.349839	0.350804	0.352362	0.354622	0.357712	0.361781	0.367007	0.373594	0.381784	0.387763	0.395082	0.400727	0.420197	0.416796	0.420616	0.412713	0.407743
	16	Russia region	0	0	0	0	0.0141263	0.205329	0.298375	0.577513	0.551666	1.51461	1.47493	1.52788	1.56785	1.59627	1.61443	1.52144	1.43402	1.44065	1.44017	1.48025	1.51654	2.14746	2.97807	2.91382	2.57235	3.0155	3.25499	3.26688	3.40579	3.67623	3.92433	4.15043	4.36621	4.55315	4.72057	4.86932	5.00039	5.11485	5.20373	5.3155	5.43909	6.14249	6.36838	6.98441	7.24187	7.5883	8.04786
	17	Middle East	0	0	0.0233204	0.0947906	0.481516	2.10492	9.64147	9.48813	6.85506	6.40256	6.28018	6.31443	6.52855	6.91278	5.64832	5.00725	4.48357	3.85747	3.34833	3.47753	2.68941	1.77447	1.17662	0.862535	0.837047	0.67481	0.643295	0.53022	0.504857	0.458747	0.421055	0.389672	0.36314	0.340417	0.320739	0.303533	0.28836	0.27488	0.351824	0.332796	0.322744	0.284224	0.271041	0.244756	0.234094	0.227464	0.218669
	18	India region	0	0	0	3.75003	3.86095	4.17753	4.41349	5.55024	6.56893	8.14591	9.33099	7.84831	6.50305	5.30315	5.25774	5.10304	4.84225	4.71336	4.54249	4.17762	4.47355	4.27402	4.01171	4.24657	4.29948	3.85621	3.23719	3.85744	4.0328	4.23867	4.45622	4.68604	4.92871	5.18485	5.45507	5.73999	6.04023	6.35642	6.67136	7.01567	7.177	7.40466	7.58381	7.39245	7.17959	6.58285	6.08082
	19	Korea	0	0	0	0	0	0.0020261	0.00402683	0.00809239	0.00500566	0.00300131	0.00169805	0.0021014	0.00260818	0.00325077	0.00406005	0.00507958	0.00636389	0.00795486	0.00995168	0.0104247	0.0107725	0.012047	0.0149219	0.0104623	0.0111162	0.0115312	0.01249	0.0115621	0.0122888	0.0126472	0.0130151	0.0133919	0.0137769	0.0141692	0.0145676	0.0149707	0.0153769	0.015784	0.0161894	0.0168366	0.0159057	0.0157153	0.0141769	0.0132669	0.0123997	0.0119318	0.0106978
	20	China region	0	0	0	0.73194	2.38535	7.13843	16.3959	29.2876	48.3565	76.4203	121.272	82.8366	53.5849	21.2769	22.0829	20.8527	21.3365	13.5632	8.16639	8.92819	7.69225	15.7803	13.819	14.735	11.5053	13.1024	11.4474	9.58902	9.11002	8.95756	8.58742	8.14594	7.78532	7.39413	7.03794	6.78727	6.57266	6.34738	6.22176	6.02568	6.03183	6.05015	6.06787	6.03712	5.97643	5.97794	6.10529
	21	Southeastern Asia	0	0	0	0	0	0.00402326	0.011302	0.0280973	0.0192161	0.0362296	0.0140497	0.0171859	0.0220943	0.0464486	0.0365205	0.0316649	0.0252803	0.0325167	0.0441595	0.0385739	0.0435921	0.0218884	0.022692	0.031071	0.0403216	0.0357652	0.0391279	0.0445741	0.0440256	0.0397266	0.0386335	0.0354897	0.0294199	0.0274617	0.0253358	0.0208545	0.0197993	0.0208064	0.0187603	0.019142	0.018826	0.0193284	0.0200657	0.0230114	0.0301381	0.0341338	0.0399121
	22	Indonesia region	0	0	0	0.0111875	0.0383452	0.0548765	0.148954	0.46381	0.530061	0.397469	0.314326	0.307626	0.30294	0.299952	0.298394	0.29802	0.298575	0.299766	0.301236	0.308271	0.317077	0.291912	0.278419	0.2919	0.322668	0.342451	0.319205	0.303817	0.30025	0.296601	0.293365	0.290504	0.287985	0.295579	0.303244	0.310984	0.318802	0.326701	0.311	0.295873	0.272732	0.250615	0.230372	0.245432	0.253727	0.247948	0.240633
	23	Japan	0	0	0	0	0	0	0.0223538	0.0718874	0.0278506	0.0215319	0.0192541	0.0292755	0.0375398	0.0542081	0.0681061	0.0943199	0.116291	0.155302	0.180277	0.213919	0.203988	0.191938	0.142361	0.144048	0.142064	0.149742	0.17824	0.233605	0.24908	0.244479	0.239923	0.235407	0.23093	0.217334	0.204833	0.193296	0.182614	0.17269	0.167	0.161677	0.156665	0.151917	0.147394	0.120129	0.101885	0.0919661	0.0860579
	24	Oceania	0	0	0	0	0	0	0	0.00750866	0.00928831	0.0319783	0.0275472	0.0183554	0.0142768	0.00989316	0.00790382	0.00574419	0.00470079	0.00342387	0.00306602	0.00289084	0.00339429	0.00363164	0.00487076	0.00488907	0.0044402	0.00392953	0.00336682	0.00256335	0.00248212	0.00261257	0.00275247	0.00290311	0.00306603	0.00326561	0.00348462	0.00372626	0.00424812	0.00482117	0.00519064	0.00549528	0.00606772	0.00737908	0.0115168	0.0205195	0.0336858	0.0601601	0.06819
	25	Greenland	0	0	0	0	0	0	0	0	0	0	0	0	0	0	0	0	0	0	0	0	0	0	0	0	0	0	0	0	0	0	0	0	0	0	0	0	0	0	0	0	0	0	0	0	0	0	0
	26	Antarctica	0	0	0	0	0	0	0	0	0	0	0	0	0	0	0	0	0	0	0	0	0	0	0	0	0	0	0	0	0	0	0	0	0	0	0	0	0	0	0	0	0	0	0	0	0	0	0
		total	0	0	0.00137891	0.189204	0.2973	0.54562	0.979952	1.09531	1.00589	1.0625	0.857604	0.834047	0.810083	0.79726	0.735321	0.680449	0.630462	0.610251	0.594272	0.583178	0.571902	0.553963	0.562792	0.560449	0.515291	0.52141	0.532836	0.501744	0.503976	0.500458	0.501249	0.495478	0.482538	0.477181	0.470454	0.449045	0.446556	0.460246	0.449692	0.456587	0.448374	0.457851	0.459877	0.471365	0.495112	0.515018	0.5169
		min	0	0	0	0	0	0	0	0	0	0	0	0	0	0	0	0	0	0	0	0	0	0	0	0	0	0	0	0	0	0	0	0	0	0	0	0	0	0	0	0	0	0	0	0	0	0	0
		max	0	0	0.0233204	3.75003	3.86095	7.13843	16.3959	29.2876	48.3565	76.4203	121.272	82.8366	53.5849	29.113	22.1955	20.8527	21.3365	13.5632	9.11171	8.92819	8.63582	15.7803	13.819	14.735	11.5053	13.1024	11.4474	11.5729	10.6008	9.65308	8.7379	8.42996	8.78322	8.75999	8.7214	8.68457	8.61798	8.59655	9.50292	10.9572	12.8966	15.3039	17.3789	17.4092	17.2945	22.238	24.6738
			-10000	-9000	-8000	-7000	-6000	-5000	-4000	-3000	-2000	-1000	0	100	200	300	400	500	600	700	800	900	1000	1100	1200	1300	1400	1500	1600	1700	1710	1720	1730	1740	1750	1760	1770	1780	1790	1800	1810	1820	1830	1840	1850	1860	1870	1880	1890
		Canada	0	0	0	0	0	0	0	0	0	0	0	0	0	0	0	0	0	0	0	0	0	0	0	0	0	0	0	20.5032	26.552	34.4206	44.6666	58.021	75.4433	98.1935	127.928	220.272	297.921	434.376	593.86	815.682	1125.67	1563.05	2177.98	3540.64	4908.12	6088.28	7635.68
		China	0	0	0	30.8218	125.558	468.699	1344.55	2995.23	5990.46	11980.9	23961.8	21675.8	18567.4	9611.16	13437.2	17024.2	23409.7	19824.4	15885.7	19628	18757.2	46734.4	54539.5	43429	39714.9	51859.7	56694.6	59284.6	61928.6	64857.7	66213.9	66884.6	68080.4	68864.6	69816.4	71728.9	74006.9	76150.7	79547.5	82098.3	83318.1	83817.6	84311.8	84640.3	84535.6	84955.2	87308.7
		Germany	0	0	0	0	0	4.35634	13.0265	36.5653	109.481	327.958	2421.44	2186.29	1962.17	1633.84	1360.38	1050.6	806.596	806.596	1613.19	3226.38	4032.98	6452.77	10485.8	12905.5	6856.07	8872.56	9679.15	8872.56	8780	8687.45	8594.89	8502.34	11292.3	11313.2	11334.1	11354.9	11375.8	12098.9	12121.1	12143.2	12165.4	12187.5	14518.7	14530.2	14541.6	14553.1	14564.6
		India	0	0	0	1440.74	2581.37	4625.06	8286.73	14847.4	26602.1	47663	85398	81516.3	77634.6	73784.9	69993.6	66281.8	62666.5	59160.6	55774.3	52514.8	49387	46393.8	43536.7	40815.7	38229.6	35776.3	33453.2	37170.2	39968	42976.3	46211.1	49689.3	53429.4	57450.9	61775.2	66425	71424.7	76800.7	82581.4	88797.3	95480.9	102668	110395	111986	113599	115294	116997
		Indonesia	0	0	0	0.0908547	0.113568	3.15151	4.35737	6.02726	48.9303	100.983	163.708	197.814	237.477	283.513	336.847	398.533	469.769	551.914	646.515	755.323	880.33	1086.83	1328.34	1610.12	2281	2918.92	3311.79	3796.32	3914.57	4036.07	4160.9	4289.14	4420.88	4736.66	5063.49	5401.68	5751.56	6113.48	6148.42	6166.16	6168.27	6156.2	6131.29	7445.14	8619.96	9666.01	10592.9
		Japan	0	0	0	0	0	0	4.43972	19.9787	27.8564	38.0464	50.0698	82.0903	112.958	174.301	233.146	342.638	447.001	630	770	960	960	992	801.879	878.596	1069.27	1341.17	1740.34	2528.58	2722.1	2697.35	2672.14	2646.45	2620.24	2575.62	2530.81	2485.79	2440.55	2395.07	2433.82	2470.15	2503.96	2535.13	2563.51	2618.43	2669.35	2814.39	3012.48
		UK	0	0	0	0	0	1.09387	3.28162	44.3018	123.302	292.903	939.463	1000.95	1039.18	1077.72	1116.35	819.009	533.271	519.897	738.464	1192.8	1614.87	2377.6	3849.71	4970.98	2132.69	2128.65	2719.49	3364.99	3613.2	3861.86	4078.8	4358.08	4629.42	4741.26	4842.88	4928.05	4754.86	4547.43	3975.09	4579.71	4666.54	5527.41	5088.78	4277.69	5601.68	6100.28	6507.25
		USA	0	0	0	0	0	0	0	0	28.5859	212.738	424.982	445.219	466.42	488.63	511.898	536.275	561.811	588.564	616.591	696.036	775.903	841.558	937.236	1021.35	1142.07	1255.49	593.613	752.547	1041.3	1353.23	1718.7	2108.28	2558.67	3084.88	3723.09	4520.84	5544.23	7865.36	10902.9	15064.9	21296	30418.6	41668.2	59147.4	67314.6	100885	125817
		Egypt	0	0	0	7.71178	34.5664	155.117	1158.97	1743.65	1500	1600	2400	2468.63	2521.73	2245.9	1985.62	1646.77	1333.82	1423.6	1492.67	1614.4	1705.05	1370.73	1156.85	1237.57	961.529	846.062	928.083	718.729	691.362	664.512	638.181	612.368	587.072	562.295	538.035	514.294	491.071	468.365	511.792	553.147	592.43	629.641	664.78	579.369	647.638	723.588	982.756
Uncertainty			-10000	-9000	-8000	-7000	-6000	-5000	-4000	-3000	-2000	-1000	0	100	200	300	400	500	600	700	800	900	1000	1100	1200	1300	1400	1500	1600	1700	1710	1720	1730	1740	1750	1760	1770	1780	1790	1800	1810	1820	1830	1840	1850	1860	1870	1880	1890
		HYDE 3.2 Baseline	0	0	0.00997535	1.80961	3.91868	10.391	28.1536	48.661	72.9409	117.254	199.078	197.598	194.924	181.426	177.619	172.325	171.168	169.775	169.805	181.365	184.975	220.455	250.33	255.817	228.044	262.474	274.914	297.04	309.189	321.817	333.37	344.708	359.996	372.343	385.421	400.319	416.211	434.439	457.414	480.933	509.05	547.089	584.576	626.115	657.324	724.061	787.498
		lower	0	0	0.000498768	0.13572	0.391868	1.29888	4.22304	8.51568	14.5882	26.3822	49.7696	55.2112	60.1972	61.3647	65.3013	68.4233	72.9982	77.3974	82.4054	93.3497	100.648	126.438	150.935	161.767	150.912	181.417	198.101	222.781	234.985	247.801	260.031	272.322	288	301.602	316.05	332.271	349.625	369.282	393.387	418.424	447.978	486.925	526.135	569.79	604.767	673.405	740.274
		upper	0	0	0.0194519	3.48349	7.44549	19.4831	52.0842	88.8063	131.294	208.126	348.387	339.985	329.652	301.487	289.938	276.227	269.338	262.152	257.205	269.381	269.302	314.473	349.727	349.868	305.178	343.534	351.73	371.302	383.397	395.837	406.715	417.101	432	443.094	454.804	468.382	482.815	499.617	521.466	543.471	570.154	607.289	643.054	682.496	709.944	774.778	834.777
		lower2	0	0	0	0	0	0	0	0	0	0	0	0	0	0	0	0	0	0	0	5.33427	16.3213	32.4199	51.5387	67.7164	73.7793	100.358	121.286	148.521	160.779	173.782	186.689	199.933	216	230.856	246.673	264.215	283.029	304.115	329.347	355.901	386.89	426.743	467.675	513.437	552.179	622.719	693.022
		upper2	0	0	0.0289285	5.15738	10.9723	28.5753	76.0148	128.952	189.646	298.998	497.696	482.371	464.379	421.549	402.256	380.129	367.508	354.53	344.604	357.396	353.629	408.491	449.123	443.918	382.311	424.592	428.545	445.562	457.603	469.856	480.057	489.49	504	513.84	524.181	536.437	549.41	564.784	585.506	605.994	631.242	667.471	701.513	738.849	762.532	825.464	882.029
per capita			-10000	-9000	-8000	-7000	-6000	-5000	-4000	-3000	-2000	-1000	0	100	200	300	400	500	600	700	800	900	1000	1100	1200	1300	1400	1500	1600	1700	1710	1720	1730	1740	1750	1760	1770	1780	1790	1800	1810	1820	1830	1840	1850	1860	1870	1880	1890
		HYDE 3.2 Baseline	0	0	0.00137891	0.189204	0.2973	0.54562	0.979952	1.09531	1.00589	1.0625	0.857604	0.834047	0.810083	0.79726	0.735321	0.680449	0.630462	0.610251	0.594272	0.583178	0.571902	0.553963	0.562792	0.560449	0.515291	0.52141	0.532836	0.501744	0.503976	0.500458	0.501249	0.495478	0.482538	0.477181	0.470454	0.449045	0.446556	0.460246	0.449692	0.456587	0.448374	0.457851	0.459877	0.471365	0.495112	0.515018	0.5169
		lower	0	0	6.89454e-05	0.0141903	0.02973	0.0682025	0.146993	0.19168	0.201179	0.239063	0.214401	0.233043	0.250173	0.269662	0.270339	0.270179	0.268874	0.278203	0.288397	0.300166	0.311183	0.317715	0.339332	0.354403	0.341003	0.360388	0.383957	0.37631	0.383024	0.385355	0.390978	0.391431	0.386035	0.386522	0.385778	0.372714	0.375115	0.391219	0.386746	0.397242	0.394581	0.407501	0.413902	0.428961	0.455524	0.478987	0.485903
		upper	0	0	0.00268887	0.364218	0.56487	1.02304	1.81291	1.99895	1.81061	1.88594	1.50081	1.43505	1.36999	1.32486	1.20031	1.09072	0.992052	0.942301	0.90015	0.866192	0.832624	0.790213	0.786256	0.766499	0.689584	0.682437	0.68172	0.627184	0.624934	0.615568	0.611529	0.599534	0.579053	0.567853	0.555145	0.525392	0.518016	0.529296	0.512663	0.515958	0.502194	0.508232	0.505881	0.513811	0.534746	0.551093	0.547933
		lower2	0	0	0	0	0	0	0	0	0	0	0	0	0	0	0	0	0	0	0	0.0171523	0.0504621	0.0814653	0.115869	0.148355	0.166712	0.199364	0.235076	0.250873	0.262069	0.270249	0.280702	0.28738	0.289526	0.295856	0.301095	0.296375	0.303664	0.32218	0.323787	0.337884	0.340775	0.357136	0.367913	0.386536	0.415913	0.442934	0.454888
		upper2	0	0	0.00399883	0.539232	0.832439	1.50045	2.64587	2.90258	2.61532	2.70938	2.14401	2.03606	1.9299	1.85246	1.66529	1.50099	1.35364	1.27435	1.20603	1.14921	1.09334	1.02646	1.00972	0.972547	0.863874	0.843461	0.830602	0.75262	0.745889	0.730674	0.721805	0.703585	0.675561	0.658519	0.639828	0.601731	0.589466	0.598335	0.575621	0.575316	0.556001	0.558597	0.55187	0.556235	0.574356	0.587145	0.578948
[truncated: 121 more columns]

## Sheet: lower
ISO1	y-10000	y-9000	y-8000	y-7000	y-6000	y-5000	y-4000	y-3000	y-2000	y-1000	y0	y100	y200	y300	y400	y500	y600	y700	y800	y900	y1000	y1100	y1200	y1300	y1400	y1500	y1600	y1700	y1710	y1720	y1730	y1740	y1750	y1760	y1770	y1780	y1790	y1800	y1810	y1820	y1830	y1840	y1850	y1860	y1870	y1880	y1890	y1900	y1910
4	0	0	0	0.166826	0.307987	1.59916	23.5077	144.404	221.554	299.826	601.419	747.018	905.836	979.119	1049.76	1117.64	1182.61	1207.2	1225.06	1249.88	1269.24	1385.22	1501.87	1078.82	1181.76	1283.97	1628.51	1645.68	1703.44	1759.56	1817.17	1876.31	1936.99	1999.27	2063.16	2128.71	2195.96	2264.92	2335.65	2408.18	2507.9	2667.89	2837.61	3017.65	3208.59	3461.83	3776.55	4119.25	4464.27
8	0	0	0	0	0	0	0	0	0	33.7452	54.5893	60.037	65.2364	70.1707	74.821	79.1654	83.1788	86.8317	90.0892	92.8164	95.0504	96.7287	97.7717	98.0738	97.4906	95.8138	92.7222	131.504	136.771	141.977	147.109	152.154	157.097	161.923	166.615	171.153	175.519	179.689	183.639	187.341	189.093	198.761	208.623	227.359	245.165	265.885	285.183	307.613	325.769
12	0	0	0	0	4.79553	29.9721	179.832	263.576	287.93	431.896	599.855	641.72	678.517	710.496	737.898	760.953	779.885	794.909	806.23	904.029	1002.88	999.517	991.934	892.932	788.144	811.104	1223.28	953.733	1005.79	1058.56	1112	1166.13	1220.91	1276.34	1332.4	1389.09	1446.39	1504.28	1562.75	1621.79	1917.26	2216.72	2520.08	2827.26	3138.18	3452.78	3770.96	4092.66	4390.18
16	0	0	0	0	0	0	0	0	0	0	0	0	0.00134245	0.00216315	0.0034551	0.00547595	0.00861785	0.013474	0.0209356	0.0323309	0.0496207	0.0756654	0.11457	0.172091	0.256013	0.376192	0.543395	0.764236	0.805063	0.847511	0.891577	0.937246	0.984485	1.03324	1.08344	1.13498	1.18772	1.24148	1.29603	1.35482	1.41404	1.4732	1.5317	1.58873	1.7514	1.92426	2.10555	2.29212	2.46321
20	0	0	0	0	0	0	0	0	0	0.16834	0.333656	0.373937	0.414039	0.453793	0.493007	0.531452	0.56886	0.604912	0.639225	0.671334	0.700665	0.726497	0.747904	0.763658	0.772069	0.770679	0.755641	0.720195	0.758254	0.797763	0.838705	0.881051	0.924752	0.96974	1.01592	1.06316	1.1113	1.16012	1.20936	1.25866	1.30758	1.35557	1.40192	1.44571	1.48577	1.52054	1.54792	1.56501	1.55784
24	0	0	0	0	0	0.0396743	0.238046	1.3886	2.69135	5.13038	9.65149	14.4047	21.2604	31.0942	45.1324	65.0886	93.3532	133.254	189.416	261.551	340.806	419.715	505.01	596.717	729.605	872.15	967.48	1067.73	513.955	528.052	542.774	558.183	574.355	591.375	609.344	628.383	648.636	670.275	693.514	718.617	745.915	775.834	808.93	845.95	887.925	936.327	993.358	1062.51	1142.54
28	0	0	0	0	0	0	0	0	0	0.128628	0.286146	0.349002	0.420964	0.503178	0.596927	0.703646	0.824942	0.962611	1.11867	1.29536	1.49521	1.72105	1.97605	2.26378	2.58823	2.95392	3.36593	3.82999	4.31107	4.85178	5.4594	6.14215	6.9092	7.77087	8.73871	9.82568	11.0463	12.4168	13.9556	15.6829	17.6218	18.6416	18.4238	16.7737	15.19	13.9909	13.6188	12.3865	11.0472
31	0	0	0	0	0	0.317407	1.33311	5.44353	7.58606	10.3529	13.8975	16.6969	19.8374	23.354	27.2853	31.6734	36.5643	42.0084	48.0609	54.0384	60.3838	95.7587	134.626	177.013	148.63	194.608	244.168	297.336	196.358	215.581	236.647	259.727	285.013	312.712	343.051	376.277	412.66	452.498	496.113	543.858	596.119	653.317	715.913	784.41	859.356	941.351	1031.05	1129.17	1228.76
32	0	0	0	0	0	1.41089	1.93494	2.57991	3.36968	4.74917	6.0307	7.70308	9.7302	12.1793	15.1296	18.6742	22.9228	28.0043	34.0697	41.2966	49.893	60.1028	72.2114	86.5531	103.519	123.565	147.226	175.127	202.813	234.836	271.87	314.692	364.2	421.432	487.583	564.033	652.375	754.448	872.37	1019.44	1178.46	1362.12	1575.06	1820.07	2118.64	2447.63	2827.36	3265.65	7346.7
36	0	0	0	0	0	0	0	0	0	0	0	0	0	0	0	0	0	0	0	0	0	0	0	0	0	0	0	0	0	0	0	0	0	0	0	0	6.0095	12.2666	17.2912	23.1238	35.4702	66.8137	176.224	432.535	804.277	1702.9	2041.76	3304.74	5242.22
40	0	0	0	0	0	0.0555556	0.5	3.5	12	22.5	125	153.676	185.294	186.029	183.824	178.676	170.588	205.147	242.647	308.824	380.882	516.176	753.676	1264.7	827.198	1382.19	1511.05	1562.56	1659.44	1755.2	1848.83	1939.02	2024.17	2093.38	2147.57	2190.45	2207.98	2168.71	2095.73	2105.5	2191.98	2180.25	2180.65	2198.54	2224.51	2289.11	2339.24	2410.77	2448.49
44	0	0	0	0	0	0	0	0	0	0	0	0.00655619	0.00790507	0.00944502	0.0111996	0.0131952	0.015461	0.0180298	0.0209378	0.0242256	0.0279381	0.0321254	0.0368431	0.042153	0.048124	0.0548322	0.0623623	0.0708084	0.0787871	0.0876496	0.0974926	0.108423	0.12056	0.134034	0.148992	0.165594	0.184019	0.204466	0.227153	0.237454	0.24819	0.348982	0.433267	0.524359	0.688667	0.891277	1.14007	1.44445	1.80425
48	0	0	0	0	0	0	0	0	0	0	0	0	0	0	0	0	0	0	0	0	0	0	0	0	0	0	0	0	0	0	0	0	0	0	0	0	0	0	1.05895	1.11003	1.16265	1.21674	1.27217	1.32881	1.38823	1.44857	1.50952	1.57068	1.62136
50	0	0	0	0	0	1.41005	8.46029	49.3517	94.0032	176.256	326.4	391.624	462.494	545.506	635.294	731.859	835.2	989.082	1155.39	1373.65	1608.85	1761.88	1921.69	2015.43	2388.7	2654.04	3595.9	4588.19	4767.2	4920.85	5076.42	5233.18	5390.2	5546.25	5699.76	5848.73	5990.77	6122.97	6242.06	6431.93	6604.93	6756.78	6883.88	6983.95	7118.07	7183.54	7432.9	7614.01	7676.31
51	0	0	0	0	0.0985518	0.431164	1.81089	7.39446	9.1528	10.9151	12.3615	14.5519	16.925	19.4865	22.2404	25.1881	28.3281	31.654	35.1537	38.3095	41.3742	63.1621	85.1327	107.004	84.9133	104.581	121.213	135.635	143.061	150.807	158.88	167.281	176.013	185.074	194.46	204.165	214.178	224.483	235.058	245.874	256.894	268.069	279.337	290.621	301.82	312.81	323.43	333.476	340.54
52	0	0	0	0	0	0	0	0	0	0	0	0.000378455	0.000448737	0.000526779	0.000613111	0.000708244	0.00081264	0.000926683	0.00105064	0.00118459	0.00132837	0.00148142	0.00602314	0.024338	0.0976651	0.388747	1.5319	5.95686	5.9902	6.02161	6.05101	6.07835	6.10356	6.12658	6.14733	6.16572	6.18169	6.19513	7.13684	8.07826	9.01799	9.95457	10.8864	11.5011	12.1083	12.7067	13.2949	13.8712	14.1912
56	0	0	0	0	0	0.0528289	0.633946	4.43763	9.4102	24.0211	69.8217	79.695	89.8702	100.317	110.998	117.265	73.808	102.559	113.801	136.657	159.755	243.521	368.567	512.306	324.925	496.793	573.093	625.008	684.417	743.347	801.645	859.142	915.658	970.995	1024.93	1077.23	1127.62	1175.81	1221.44	1264.14	1354.73	1346.07	1417.4	1489.3	1547.65	1664.11	1804.8	1838.04	1853.62
60	0	0	0	0	0	0	0	0	0	0	0	0.0101874	0.0120746	0.0141685	0.0164827	0.01903	0.0218218	0.024867	0.0281707	0.0317329	0.0355454	0.0395891	0.0438283	0.0482038	0.0526213	0.056932	0.0609004	0.064141	0.0716038	0.0799031	0.0891283	0.0993773	0.110758	0.123388	0.137397	0.152925	0.170126	0.189168	0.210231	0.233512	0.259223	0.287592	0.318861	0.353291	0.391156	0.432743	0.478352	0.528289	0.579222
64	0	0	0	0	0	0	0	0	0	0	0	0.169278	0.255131	0.381041	0.564783	0.831772	1.21825	1.77582	2.57781	2.48549	2.38865	2.28888	2.18751	2.29421	2.38108	2.82603	3.57125	4.22389	4.91765	5.34049	5.80133	6.30364	6.85119	7.44812	8.09895	8.80859	9.58243	10.4263	11.3468	13.4378	15.0772	18.1583	19.6112	20.7886	22.5782	25.6181	26.854	30.0698	36.6694
68	0	0	0	0	0	3.69073	14.7629	57.4113	67.7663	77.1301	83.5441	97.8949	113.343	129.916	147.631	166.491	186.48	207.56	229.657	260.767	291.983	327.756	362.645	395.796	426.133	452.248	393.496	378.919	387.825	396.774	405.758	414.763	423.779	432.791	441.783	450.739	459.639	468.463	477.188	565.979	670.872	677.844	684.299	813.946	696.648	579.893	939.887	815.602	925.722
70	0	0	0	0	0	0.494443	2.82705	15.7151	26.5196	43.1576	66.8576	74.5946	82.309	89.9134	97.3762	104.661	111.727	118.523	124.994	131.071	136.672	147.489	157.741	167.154	175.381	181.964	217.973	210.289	223.907	234.029	244.508	255.349	266.556	278.132	290.077	302.393	315.077	328.126	341.534	362.047	383.567	406.116	429.708	454.353	501.554	553.216	609.672	671.259	733.696
72	0	0	0	0	0	0	0	0	0	0	0	0	0	0	0	0	0	0	0	0	0	0	0	0	0	0	0	0	0	0	0	0	0	0	0	0	0	0	79.9501	82.9096	86.1322	89.6692	93.5878	97.978	102.964	108.725	115.528	123.796	133.414
76	0	0	0	0	0	0	1.26889	2.96073	6.76739	15.2266	33.837	40.4134	47.7331	55.8673	64.8931	74.8948	85.9637	98.1991	111.709	120.58	129.719	151.475	174.743	199.524	225.816	272.075	75.2817	102.424	112.728	124.143	136.708	150.666	166.314	183.721	203.274	225.352	250.429	279.107	349.59	434.325	557.892	684.933	815.615	950.134	1088.91	1224.55	1537.48	1882.73	2383.25
84	0	0	0	0	0	0	0.0573324	0.250829	0.333185	0.42685	0.520673	0.624591	0.74033	0.868752	1.0107	1.16697	1.33826	1.52513	1.7279	1.9466	2.18074	2.42918	2.68978	2.95898	3.23108	3.49712	3.74292	3.9453	4.28927	4.66139	5.06377	5.49865	5.96838	6.47546	7.02253	7.61236	8.24785	8.93202	9.66803	9.989	10.3149	10.6451	10.9792	11.3162	12.6895	14.2187	15.9194	17.8081	19.7777
86	0	0	0	0	0	0	0	0	0	0	0	0	0	0	0	0	0	0	0	0	0	0	0	0	0	0	0	0	0	0	0	0	0	0	0	0	0	0	0	0	0	0	0	0	0	0	0	0	0
90	0	0	0	0	0	0	0	0	0	0	0	0.00151644	0.00247091	0.00398582	0.00637413	0.0101162	0.0159456	0.0249762	0.0388893	0.0602063	0.0926784	0.141835	0.21573	0.325909	0.488544	0.725487	1.0644	1.53556	1.92755	2.41857	3.03336	3.80273	4.76505	5.96807	7.47114	9.348	11.6901	14.611	18.251	19.2397	20.2687	21.3381	22.4474	23.5957	24.287	24.9756	25.6579	26.3299	26.818
92	0	0	0	0	0	0	0	0	0	0	0	2.24471e-06	4.97709e-06	1.09351e-05	2.38429e-05	5.16532e-05	0.000111284	0.000238611	0.000509476	0.0010838	0.00229795	0.00485795	0.0102426	0.021544	0.0452157	0.0947074	0.198008	0.413282	0.453241	0.496976	0.54484	0.597215	0.65452	0.717211	0.785788	0.860792	0.942819	1.03252	1.13059	1.18217	1.23595	1.292	1.35042	1.41131	1.47641	1.54432	1.61518	1.68909	1.75515
96	0	0	0	0	0	0	0	0	0	0	0	0.0338555	0.0510263	0.0762081	0.112957	0.166354	0.24365	0.355164	0.515561	0.497097	0.47773	0.549331	0.875003	0.917686	0.952432	0.753608	0.892814	1.01373	1.12127	1.30423	1.51747	1.76605	2.05588	2.39386	2.78804	3.24785	3.7843	4.41024	5.14069	5.89578	6.40617	7.47166	7.81468	8.02224	8.0016	8.33776	8.40197	9.00747	10.4787
100	0	0	0	0	0	0.505968	3.33939	21.4277	41.8554	78.9811	142.459	203.9	273.043	266.576	255.311	239.493	219.388	229.742	239.259	322.233	408.8	455.969	497.381	542.867	301.34	439.544	683.589	674.196	702.196	740.854	781.422	823.983	868.619	915.417	964.466	1015.86	1069.68	1126.04	1185.02	1246.77	1291.51	1364.45	1441.06	1470.65	1499.95	1752.56	2014.55	1923.73	2238.28
104	0	0	0	0	0	0.179265	0.717062	2.78857	3.48461	43.6025	93.9043	115.438	139.18	165.129	193.286	223.65	256.222	291.002	327.99	367.185	408.589	538.335	679.121	688.498	857.163	1037.97	1217.4	1407.87	1455.17	1503.22	1552.03	1601.58	1651.89	1702.95	1754.76	1807.32	1860.63	1914.69	2066.36	2221.03	2378.71	2539.39	2703.08	3040.59	3384.85	3735.76	4635.1	5637.67	6904.08
108	0	0	0	0	0	0.0140269	0.0673294	0.314204	0.459454	0.657512	0.922159	1.49014	2.38102	3.76958	5.92207	9.24298	14.3452	22.1549	34.0694	44.8517	56.491	71.9168	88.4036	105.916	124.417	143.869	163.637	184.237	189.552	194.146	198.92	203.892	209.082	214.515	220.22	226.23	232.587	239.338	246.543	254.275	262.628	271.717	281.696	292.77	305.219	319.441	336.027	355.905	378.264
112	0	0	0	0	0	2.30615	9.68581	39.5504	48.9754	58.4455	66.2819	81.9458	98.8631	116.892	135.878	143.677	150.874	170.538	190.464	210.388	230	351.437	533.491	535.978	533.898	701.644	852.401	1082.17	1282.36	1392.53	1511.37	1639.46	1777.41	1925.82	2085.32	2256.56	2440.17	2636.77	2846.96	3071.32	3310.33	3564.4	3833.82	4118.68	4418.86	4733.92	5062.98	5404.62	5720.7
116	0	0	0	0	0	0.36976	1.96141	10.1547	16.2075	25.218	38.0681	45.267	53.2087	61.9486	71.5441	82.0543	93.5391	106.059	119.673	131.845	144.262	164.321	184.95	206	227.309	248.693	280.911	313.07	320.127	327.233	334.388	341.591	348.841	356.136	363.474	370.855	378.277	385.739	393.239	400.776	411.855	425.154	438.814	452.844	467.252	502.231	565.763	636.306	710.109
120	0	0	0	0	0	0.297689	1.60752	8.43949	15.0079	26.176	44.9572	57.5888	72.9504	91.5692	114.068	141.183	173.78	212.881	259.688	315.617	382.331	461.784	556.269	668.479	801.57	959.241	1145.83	1366.4	1374.32	1406.23	1439.24	1473.46	1509.01	1546.04	1584.7	1625.19	1667.74	1712.63	1760.2	1810.86	1865.13	1923.66	1987.31	2057.21	2134.89	2222.52	2323.32	2442.23	2571.4
124	0	0	0	0	0	0	0	0	0	0	0	0	0	0	0	0	0	0	0	0	0	0	0	0	0	0	0	15.3774	20.1795	26.5038	34.8399	45.8366	60.3546	79.5367	104.901	182.825	250.253	369.219	510.72	709.644	990.585	1391.11	1960.19	3221.98	4515.47	5662.1	7177.54	7970.58	13820.6
132	0	0	0	0	0	0	0	0	0	0	0	0	0	0	0	0	0	0	0	0	0	0	0	0	0	0	1.64801	3.33475	3.60543	3.94544	4.31666	4.72191	5.16423	5.64694	6.17364	6.74827	7.37509	8.05874	8.80427	9.61715	10.5034	11.4694	12.5222	13.6695	14.9196	16.2815	17.765	19.3808	21.0082
136	0	0	0	0	0	1.61039e-05	0.000115948	0.000811635	0.0017211	0.00351466	0.12304	0.147423	0.174514	0.20449	0.237516	0.273734	0.313255	0.356135	0.402355	0.451782	0.504128	0.55887	0.615145	0.671579	0.726004	0.774946	0.812614	0.828532	0.896708	0.969819	1.04812	1.13186	1.22126	1.31655	1.4179	1.52545	1.63928	1.75937	1.88561	1.92704	1.96587	2.00141	2.03279	2.05896	2.08087	2.09453	2.09764	2.08709	2.04557
140	0	0	0	0	0	0.23542	1.27127	6.67416	11.8967	20.7892	35.7615	42.1989	49.2419	56.9378	65.337	74.4934	84.4649	95.3132	107.105	119.91	133.805	148.87	165.192	182.863	201.983	222.656	244.995	269.121	273.693	281.471	289.608	298.141	307.112	316.572	326.579	337.204	348.531	360.662	373.719	387.859	403.277	420.221	439.021	460.118	484.122	511.906	544.783	584.835	631.666
144	0	0	0	0	0	0.515928	2.32168	10.1573	13.5368	17.4353	21.4857	27.6066	34.3389	41.6334	49.4366	57.6909	66.3335	75.2956	84.5011	93.8652	103.293	119.302	135.428	133.531	129.433	139.87	174.51	207.308	210.074	207.512	204.927	202.322	199.697	197.056	194.398	191.727	189.043	186.348	183.643	180.929	202.577	284.131	399.06	521.531	591.081	595.742	651.263	779.535	865.49
148	0	0	0	0	0	0.477567	2.29232	10.6975	16.8933	26.1701	39.927	51.1423	64.7805	81.3095	101.282	125.35	154.283	188.987	230.529	258.762	288.697	327.972	369.793	425.671	497.635	557.13	679.332	810.067	847.727	865.948	884.718	904.089	924.118	944.876	966.439	988.903	1012.38	1036.99	1062.91	1090.33	1119.5	1150.71	1184.38	1221.03	1261.38	1306.43	1357.65	1417.31	1479.85
152	0	0	0	0	0	0.874954	3.32228	12.3251	13.981	28.6964	56.1515	66.246	77.2279	89.1357	102.002	115.853	130.702	146.55	163.376	180.959	198.467	223.252	247.651	271.155	293.134	312.788	308.486	301.381	311.106	321.035	331.165	341.495	352.021	362.74	373.648	384.738	396.004	407.438	419.032	463.679	512.861	567.003	701.513	881.628	1038.36	1206.71	1365.41	1529.63	1749.75
156	0	0	0	2.31163	12.5558	58.5874	201.683	524.165	1198.09	2695.71	5990.46	6056.47	5734.04	3250.83	4940.15	6759.61	9983.55	9037.6	7709.24	10102.6	10206.1	26803.6	32884.1	27462.4	26281.9	35844.2	40853.5	44463.5	47065.7	49940.5	51646.8	52838.8	54464.3	55780.4	57249.4	59535	62165.8	64728.1	68410.8	71425.5	73319.9	74597.7	75880.6	77022.7	77772.7	79008.4	82070.2	85251.9	88483.2
158	0	0	0	0	0	0.122935	0.590086	2.75373	3.89332	5.30131	6.8488	7.52267	8.16349	8.76917	9.33735	9.86532	10.3499	10.7874	11.1733	11.5023	11.7678	14.3537	16.9015	19.3385	21.5708	23.4697	22.5869	105.775	120.402	126.73	133.295	140.096	147.126	154.377	161.836	169.487	177.308	185.269	193.333	201.454	204.644	208.828	212.64	215.662	217.859	219.538	220.035	243.456	265.262
162	0	0	0	0	0	0	0	0	0	0	0	0	0	0	0	0	0	0	0	0	0	0	0	0	0	0	0	0	0	0	0	0	0	0	0	0	0	0	0	0	0	0	0	0	0	0	0	0	0
166	0	0	0	0	0	0	0	0	0	0	0	0	0	0	0	0	0	0	0	0	0	0	0	0	0	0	0	0	0	0	0	0	0	0	0	0	0	0	0	0	0	0	0	0	0	0	0	0	0
170	0	0	0	0	0	8.16868	36.7591	160.821	213.293	272.554	330.782	387.356	448.169	513.299	582.779	656.577	734.577	816.551	902.121	1022.51	1142.51	1317.97	1489.28	1651.67	1798.99	4147.06	3278.68	2612.01	2880.4	3161.34	3455.08	3761.86	4081.94	4415.57	4762.98	5124.45	5500.2	5890.5	5147.1	4442.51	4799.64	5165.32	5467.5	5430.76	5312.47	5759.94	5973.41	6161.7	6336.99
174	0	0	0	0	0	0	0	0	0	0	0	0	0	0	0	0	0	0	0	1.08981	2.2996	2.90289	3.55325	4.25037	4.99392	5.78359	7.52165	9.37499	9.45034	10.2565	11.1295	12.0748	13.0983	14.2064	15.4058	16.7041	18.1091	19.6295	21.2746	23.0544	24.9798	27.0626	29.3153	31.7516	34.3862	37.235	40.3152	43.6452	46.9497
175	0	0	0	0	0	0	0	0	0	0	0	0	0	0	0	0	0	0	0	0	0	0	0	0	0	0	0	0	0	0	0	0	0	0	0	0	0	0	0	0	0	0	0	0	0	0	0	0	0
178	0	0	0	0	0	0.0593896	0.28507	1.33033	2.03802	3.07313	4.57639	5.84847	7.39133	9.25646	11.5046	14.2072	17.4484	21.3271	25.9595	31.482	38.0546	45.865	55.133	66.116	79.1154	94.4836	112.633	134.044	136.521	139.604	142.79	146.088	149.511	153.072	156.784	160.668	164.744	169.038	173.581	178.412	183.578	189.141	195.179	201.797	209.137	217.4	226.879	238.032	250.048
180	0	0	0	0	0	0.502381	2.32951	10.5127	15.3721	22.1444	31.5313	45.8769	66.0967	94.4836	134.202	189.615	266.728	373.803	522.195	622.475	730.457	897.398	1077.15	1269.67	1548.67	1846.76	2043.68	2250	2297.78	2342.81	2388.98	2436.41	2485.21	2535.53	2587.53	2641.4	2697.38	2755.71	2816.75	2880.88	2948.6	3020.54	3097.49	3180.53	3271.08	3371.14	3483.61	3612.96	3742.99
184	0	0	0	0	0	0	0	0	0	0	0	0.000803269	0.00132498	0.00216553	0.00351228	0.00565963	0.00906902	0.0144618	0.0229633	0.036325	0.0572682	0.0900133	0.141094	0.220612	0.34416	0.535772	0.832453	1.2911	1.37625	1.46677	1.56297	1.66521	1.77385	1.88927	2.0119	2.14217	2.28053	2.42749	2.58356	2.75692	2.94152	3.13807	3.34732	3.57009	3.73121	3.89913	4.07414	4.25651	4.41875
188	0	0	0	0	0	0.333729	1.80213	9.46121	15.0641	23.1153	33.7106	40.4155	47.874	56.1387	65.2595	75.2819	86.244	98.1718	111.074	124.934	139.698	155.259	171.434	187.926	204.264	219.709	3.79801	10.2886	11.1653	12.1106	13.1291	14.2258	15.4054	16.6732	18.0343	19.494	21.0575	22.7301	25.3194	28.1637	33.1081	39.393	45.7548	52.0993	65.3397	82.8859	99.8915	126.529	153.643
191	0	0	0	0	0	0.430795	2.74384	16.9907	31.89	57.6627	99.0012	110.37	121.676	132.786	143.648	154.202	164.377	174.091	183.247	191.727	199.388	214.475	228.467	240.874	251.051	258.105	305.1	288.183	295.123	307.539	320.283	333.343	346.702	360.343	374.238	388.357	402.662	417.106	431.633	454.658	478.331	502.562	527.228	552.17	603.026	657.1	714.159	773.77	829.995
192	0	0	0	0	0	0	0	0	0	0	0	0.243395	0.332695	0.450475	0.605109	0.807295	1.07066	1.41253	1.85487	2.42546	3.15934	4.10058	5.30448	6.84018	8.79382	11.2724	14.4079	18.363	21.5777	25.3504	29.7772	34.971	41.0634	48.209	56.5885	66.4138	77.9324	91.4344	107.259	125.804	159.281	200.897	253.349	271.183	289.27	312.134	337.212	364.258	479.836
196	0	0	0	0.0548589	0.365726	2.28579	13.7147	20.1013	21.9587	32.938	45.7473	50.9787	56.0998	61.0823	65.8957	70.5071	74.8808	78.9786	82.7592	72.8924	62.5059	62.1495	69.5981	80.3834	58.7819	75.8576	43.6971	38.1088	38.2539	38.3896	38.5156	38.6321	38.7391	38.8365	38.9243	39.0026	39.0713	39.1305	42.0297	44.925	47.8146	50.6963	53.5681	59.6048	65.6261	71.6277	77.6051	83.5539	95.563
203	0	0	0	0	0	0.463913	3.34017	23.3812	49.6494	101.624	197.776	217.599	236.548	254.566	271.586	287.536	302.329	315.866	328.029	380.633	433.689	530.486	716.401	1080.73	898.342	1064.53	1556.15	1488.2	1534.64	1580.64	1626.12	1670.99	1715.14	1758.48	1800.89	1842.25	1882.44	1921.3	1958.7	1994.46	2327.82	2656.47	2771.45	2960.86	3168.34	3359.18	3514.45	3746.06	3988.53
204	0	0	0	0	0	0.21339	1.28034	7.46866	14.071	26.086	47.7443	60.9114	76.8484	96.0755	119.204	146.954	180.168	219.838	267.125	323.39	390.225	469.495	563.381	674.429	793.027	919.145	988.949	987.106	923.206	863.293	807.133	754.501	705.189	658.997	615.736	575.23	537.31	501.819	468.608	444.371	421.333	399.437	378.631	358.865	370.166	381.777	393.707	405.963	415.939
208	0	0	0	0	0	0	0	0	0	0.191156	15.6753	57.8143	69.3234	81.7636	95.0999	109.294	124.306	140.094	156.613	172.715	191.664	233.598	278.779	324.253	223.8	346.749	416.975	490.251	505.769	522.065	539.092	556.925	575.648	604.593	624.62	644.923	665.498	686.346	747.346	809.447	901.32	970.551	1082.86	1237.3	1390.84	1547.82	1722.52	1941.12	2195.7
212	0	0	0	0	0	0	0	0	0	0	0	0.0180739	0.0245207	0.0329309	0.0438394	0.057911	0.0759641	0.0989984	0.12822	0.165063	0.211197	0.268506	0.339009	0.424682	0.527048	0.646363	0.779848	0.917643	1.07199	1.25153	1.46019	1.70248	1.98356	2.30927	2.68627	3.12209	3.6252	4.20506	4.87222	5.63826	6.51583	7.51847	8.47407	9.97127	10.7099	10.7729	7.48083	10.2298	11.7466
214	0	0	0	0	0	0	0.05852	0.256025	0.349981	0.467785	0.611892	0.849196	1.16532	1.58439	2.13757	2.86499	3.81828	5.06372	6.68627	8.79471	11.528	15.0637	19.6278	25.5082	33.071	42.7808	21.6415	23.236	24.5027	25.8338	27.2326	28.7023	30.2464	31.8685	33.5723	35.3619	37.2413	39.215	41.2874	44.7052	48.3993	52.3917	56.7061	61.3681	81.3462	107.815	143.618	190.07	240.752
218	0	0	0	0	0	2.47034	9.88135	38.4275	45.4687	51.957	56.7094	65.6731	75.1559	85.1594	95.6795	106.706	118.218	130.188	142.57	172.22	202.745	228.558	254.196	279.208	303.045	325.028	268.974	264.093	265.971	267.783	269.528	271.205	272.811	274.346	275.806	277.191	278.497	279.724	280.867	281.925	353.439	405.142	464.251	521.494	578.793	662.134	729.228	802.806	921.826
222	0	0	0	0	0	0.304496	1.21798	4.7366	5.58163	6.33535	6.82464	8.17838	9.68288	11.3482	13.1837	15.1978	17.3968	19.7845	22.3604	25.1185	28.0438	31.1095	34.2703	37.4546	40.5487	43.3719	45.6251	46.7771	47.3503	48.0422	48.9072	50.0224	51.4985	53.4947	56.2402	65.8149	75.2337	84.4622	93.462	102.19	117.195	131.669	145.516	167.886	189.048	221.652	251.912	279.344	342.91
226	0	0	0	0	0	0.13521	0.608445	2.66195	3.57416	4.65725	5.8587	7.19066	8.72391	10.4833	12.496	14.7918	17.4032	20.3654	23.716	27.8391	32.1432	33.2728	34.3159	52.8993	63.2044	73.719	79.6547	85.4563	86.7874	88.1212	89.4819	90.8731	92.2992	93.7654	95.2777	96.8439	98.4734	100.178	101.973	103.879	105.922	108.14	110.587	113.346	116.551	120.444	125.52	133.086	147.995
231	0	0	0	0	0	0.597285	3.01032	14.7506	23.5352	36.964	57.3368	78.3323	105.83	141.684	188.249	248.519	326.284	426.345	554.772	588.226	621.661	655.076	688.471	721.848	755.205	788.542	821.86	855.158	885.426	916.189	947.447	979.201	1011.45	1044.19	1077.43	1111.17	1145.4	1180.12	1215.34	1251.05	1771.99	2304.41	2848.31	3403.69	3970.55	4548.89	5138.71	5740.01	6313.07
232	0	0	0	0	0	0.0589831	0.265424	1.16123	1.62838	2.24531	3.05399	3.6679	4.35634	5.127	5.98828	6.94937	8.02035	9.21221	10.537	11.7696	13.0669	15.8026	18.7362	23.1227	27.8147	32.8097	38.3894	44.2889	45.6679	47.1939	48.8057	50.5127	52.3263	54.2593	56.3275	58.5495	60.9477	63.5496	66.3891	69.5089	72.9633	76.8229	81.1814	86.1665	91.9575	98.8161	107.143	117.588	130.481
233	0	0	0	0	0	0	0	0.107446	0.491183	2.21033	9.82367	23.1145	26.415	29.8825	33.5113	37.2924	41.2121	45.2512	49.3834	53.5729	57.7714	61.914	65.9128	69.6472	72.9478	75.5689	77.1356	77.028	90.0805	105.288	122.994	143.593	167.541	195.356	227.635	265.057	308.394	358.524	416.434	473.376	537.545	609.719	690.715	781.378	803.127	824.015	843.726	861.87	872.47
234	0	0	0	0	0	0	0	0	0	0	0	0.00935084	0.0103601	0.0113628	0.0123544	0.0133297	0.0142825	0.0152056	0.0160902	0.016926	0.0177001	0.0183966	0.0189956	0.019471	0.0197876	0.0198965	0.0197245	0.0191529	0.0240083	0.0300792	0.0376653	0.0471387	0.058961	0.073704	0.0920755	0.11495	0.143406	0.178772	0.222681	0.277135	0.344585	0.428016	0.531058	0.658101	0.814427	1.00635	1.24137	1.52825	1.86542
238	0	0	0	0	0	0	0	0	0	0	0	0	0	0	0	0	0	0	0	0	0	0	0	0	0	0	0	0	0	0	0	0	0	0	0	0	0	0	0	0	0	0	0	0	0	0	0	0	0
242	0	0	0	0	0	0	0	0	0	0.632518	0.778127	0.951949	1.15088	1.37771	1.63537	1.92697	2.25572	2.62489	3.03767	3.49711	4.00583	4.56579	5.17783	5.84108	6.55203	7.30313	8.08057	8.86063	9.39649	9.962	10.5586	11.1879	11.8515	12.5509	13.2879	14.0643	14.8818	15.7425	16.6482	17.6499	18.7063	19.8202	20.994	22.2306	23.0629	23.9187	25.1473	26.3736	34.563
246	0	0	0	0	0	0	0	0	0.163345	0.514537	3.2669	5.47686	7.90801	10.5935	13.4997	16.5892	19.8199	23.1435	26.504	33.6319	40.768	47.6434	54.3242	60.7118	54.6783	53.8902	105.656	206.03	226.741	249.479	274.437	301.829	331.885	364.859	401.028	440.695	484.19	531.875	622.989	727.367	903.578	1020.08	1223.33	1366.13	1548.68	1642.94	1842.72	2040.94	2256.98
250	0	0	0	0	13.7065	22.2817	51.6518	115.87	315.515	669.425	1712.46	2180.25	2694.1	2581.83	2412.41	2444.28	2454.07	2728.2	3008.48	3604.95	4225.89	5198.75	7229.06	11255.9	7868.84	10804.8	13294.3	15600.9	16117.8	16634.2	17149.4	17662.7	18173.1	18679.7	19181.4	19677	20165.4	20644.9	21966.9	23125.3	23972.8	24883.7	25755.7	25644.6	25441.7	25613.4	25393	24723.1	24005.1
254	0	0	0	0	0	0	0	0	0	0	0	0.136639	0.161746	0.189526	0.220131	0.253694	0.290316	0.330048	0.372871	0.418662	0.467152	0.517852	0.569961	0.622198	0.672546	0.71777	0.752471	0.766875	0.852281	0.946534	1.05043	1.16481	1.29056	1.42859	1.57984	1.74525	1.92574	2.12217	2.33531	2.56576	2.81386	3.07955	3.36225	3.66051	3.97174	4.29157	4.61305	4.92521	5.1781
258	0	0	0	0	0	0	0	0	0	0	0	0.00480714	0.0078275	0.012617	0.02016	0.0319648	0.0503292	0.0787334	0.122414	0.189189	0.290632	0.443679	0.672759	1.01238	1.50979	2.22625	3.23274	4.58748	4.8386	5.1006	5.3736	5.65773	5.95303	6.25946	6.57689	6.9051	7.2437	7.59217	7.94977	8.33861	8.73646	9.14174	9.55237	9.9657	10.1711	10.3596	10.5264	10.666	10.7038
262	0	0	0	0	0	0	0	0	0	0	0	0	0	0	0	0	0	0	0	0	0	0	0	0	0	0	0	0	0	0	0	0	0	0	0	0	0	0	2.73835	2.7525	2.76521	2.7763	2.78559	2.79283	2.79773	2.79996	2.79908	2.79463	2.76874
266	0	0	0	0	0	0	0.0795991	0.417895	0.685978	1.10126	1.73082	2.19651	2.75627	3.42685	4.22776	5.18173	6.31516	7.65869	9.24786	11.1239	13.3343	15.9343	18.9873	22.5668	26.7572	31.6557	37.374	44.0404	45.4949	46.4754	47.488	48.5359	49.6227	50.7526	51.9305	53.1624	54.455	55.8168	57.2577	58.7902	60.4299	62.1962	64.1148	66.2193	68.5558	71.1891	74.2146	77.7804	81.6201
268	0	0	0	0	0.643392	2.81484	11.8223	48.2745	59.7144	71.1336	80.3826	94.593	109.976	126.565	144.381	163.426	183.681	205.096	227.576	247.443	266.611	406.398	546.725	684.533	542.197	663.738	764.933	834.618	531.425	575.481	622.731	673.333	727.44	785.191	846.709	912.088	981.389	1054.62	1131.73	1212.56	1296.87	1384.21	1473.97	1565.2	1656.58	1746.24	1831.47	1908.37	1958.84
270	0	0	0	0	0	0	0	0	0	0	0	0.0581508	0.0732365	0.0913967	0.113195	0.13929	0.170456	0.207598	0.251773	0.304217	0.366374	0.439928	0.526844	0.629409	0.750291	0.892593	1.05992	1.25649	1.14923	1.05094	0.960904	0.878432	0.802911	0.733767	0.670475	0.612551	0.55955	0.511062	0.466711	0.70796	1.07377	1.6284	2.46918	3.74361	5.67514	8.60224	13.0375	19.7574	29.7505
275	0	0	0	0.195776	1.04414	5.22068	25.0593	29.383	25.6784	30.8141	34.2379	37.4257	40.3744	43.0638	43.5376	43.6155	43.3217	42.6794	41.7109	40.4374	38.8792	37.0559	34.9862	32.6878	30.1779	27.4726	24.5876	21.5377	23.8548	26.4093	29.2241	32.3242	35.7366	39.4905	43.618	48.1533	53.1339	58.5999	62.2879	66.173	70.2622	74.5627	79.0811	83.824	83.7147	83.5534	83.3383	83.0682	82.2242
276	0	0	0	0	0	0.544542	1.95397	6.39892	21.8961	73.7905	605.36	610.876	605.964	552.623	500.139	417.152	343.99	367.713	782.873	1660.64	2194.42	3700.85	6322.29	8160.86	4537.1	6132.5	6974.68	6654.42	6672.8	6689.34	6704.02	6716.85	9033.88	9163.7	9293.94	9424.59	9555.66	10284.1	10424.1	10564.6	10705.5	10846.9	13066.9	13222.5	13378.3	13534.4	13690.7	15325.3	15372.4
288	0	0	0	0	0	0.208245	1.12452	5.90373	10.0966	16.9972	28.2603	36.0885	45.5744	57.0317	70.8296	87.4026	107.262	131.007	159.343	193.096	233.235	280.893	337.401	404.312	483.444	576.922	687.228	817.261	834.816	852.887	871.52	890.77	910.697	931.371	952.877	975.31	998.787	1023.45	1049.45	1077.02	1106.39	1137.9	1171.97	1209.14	1250.18	1296.14	1348.58	1409.89	1474.78
292	0	0	0	0	0	0	0	0	0	0	0	0	0	0	0	0	0	0	0	0	0	0	0	0	0	0	0	0	0	0	0	0	0	0	0	0	0	0	0	0	0	0	0	0	0	0	0	0	0
296	0	0	0	0	0	0	0	0	0	0	0	0	0	0	0	0	0	0	0	0	0	0	3.56626	4.16715	4.85864	5.65357	6.5665	7.61399	8.12372	8.66608	9.24308	9.85688	10.5098	11.2041	11.9425	12.7277	13.5626	14.4501	15.3936	16.442	17.5595	18.7506	20.0199	21.3724	22.3582	23.3866	24.4595	25.5788	26.5791
300	0	0	0	0	0.577038	1.38711	3.32906	7.76782	26.6325	99.8719	221.938	248.048	274.158	262.735	244.784	202.681	151.44	172.002	193.869	217.042	241.52	274.942	313.128	350.857	264.367	306.796	479.777	499.36	528.845	558.931	589.617	620.905	652.792	685.281	718.371	752.061	786.352	821.243	856.735	892.828	989.806	1097.05	1216.04	1347.5	1493.39	1671.44	1870.08	2092.38	2252.79
304	0	0	0	0	0	0	0	0	0	0	0	0	0	0	0	0	0	0	0	0	0	0	0	0	0	0	0	0	0	0	0	0	0	0	0	0	0	0	0	0	0	0	0	0	0	0	0	0	0
308	0	0	0	0	0	0	0	0	0	0.197494	0.398059	0.479765	0.5716	0.674536	0.789612	0.917929	1.06065	1.21899	1.3942	1.58758	1.80044	2.03407	2.2897	2.5685	2.87143	3.19924	3.55228	3.93037	4.29761	4.69824	5.13524	5.61184	6.13154	6.69817	7.31587	7.98916	8.72292	9.52248	10.3936	10.8328	11.2887	11.762	12.2532	12.7631	13.3069	13.8719	14.4587	15.0682	15.6031
312	0	0	0	0	0	0	0	0.118358	0.252556	0.52104	1.02944	1.2372	1.46946	1.72825	2.01568	2.33384	2.68481	3.07059	3.49296	3.95345	4.45309	4.99225	5.57031	6.18525	6.833	7.5066	8.19481	8.88001	9.68692	10.5645	11.5187	12.556	13.6833	14.9083	16.2389	17.684	19.253	20.9561	22.8043	23.6944	24.6131	25.5612	26.5392	27.5478	28.6194	29.725	30.8655	32.0413	33.0452
316	0	0	0	0	0	0	0	0	0	0	0	0.0427515	0.0580743	0.0781029	0.10414	0.137813	0.181143	0.236622	0.307299	0.39686	0.509708	0.650997	0.826608	1.04297	1.30661	1.62314	1.9952	2.41812	2.55879	2.70664	2.86196	3.02503	3.19616	3.37562	3.56371	3.76071	3.96689	4.18252	4.40783	4.65597	4.91562	5.18705	5.47048	5.76608	5.95271	6.14142	6.33178	6.52324	6.67323
320	0	0	0	0	0	1.83487	7.33946	28.5423	33.6667	38.2739	41.3614	49.5908	58.7464	68.8928	80.0922	92.4009	105.867	120.522	136.381	210.957	288.361	313.433	337.172	358.869	377.612	392.173	286.282	318.658	315.388	312	308.493	304.868	301.124	297.258	293.269	289.156	284.914	280.542	276.034	271.385	305.007	341.346	381.637	430.124	477.318	513.476	534.444	555.343	602.723
324	0	0	0	0	0	0.0937483	0.506241	2.65776	4.40529	7.16058	11.441	14.5477	18.2918	22.7894	28.1764	34.6115	42.2801	51.3983	62.2184	75.0338	90.1863	108.073	129.156	153.972	183.141	217.387	257.544	304.581	310.95	317.503	324.257	331.232	338.451	345.939	353.726	361.849	370.349	379.276	388.692	398.673	409.312	420.728	433.074	446.554	461.444	478.132	497.187	519.489	543.084
328	0	0	0	0	0	0	0.0253909	0.177736	0.379189	0.782066	1.54434	2.12652	2.89381	3.89942	5.21062	6.91211	9.11003	11.9367	15.5564	20.1712	26.0283	29.4156	32.8123	38.9514	45.0609	51.0239	51.0269	56.1347	59.2857	62.5977	66.078	69.7343	73.5746	77.6072	81.8405	86.2834	90.945	95.8348	100.962	106.847	113.046	119.574	126.448	133.683	145.416	158.137	171.926	186.867	201.781
332	0	0	0	0	0	0	0	0	0	0	0	0.207131	0.337269	0.54363	0.868626	1.37723	2.16844	3.39217	5.27397	8.15064	12.5206	19.1132	28.9802	43.6071	65.0266	95.8725	18.4415	21.8014	27.3053	34.1791	42.7581	53.4571	66.7898	83.3903	104.041	129.705	161.564	201.069	249.992	310.49	348.252	369.837	392.2	431.365	468.699	491.689	544.719	601.746	676.653
334	0	0	0	0	0	0	0	0	0	0	0	0	0	0	0	0	0	0	0	0	0	0	0	0	0	0	0	0	0	0	0	0	0	0	0	0	0	0	0	0	0	0	0	0	0	0	0	0	0
336	0	0	0	0	0	0	0	0	0	0	0	0	0	0	0	0	0	0	0	0	0	0	0	0	0	0	0	0	0	0	0	0	0	0	0	0	0	0	0	0	0	0	0	0	0	0	0	0	0
340	0	0	0	0	0	0.484827	1.93931	7.54176	8.96847	10.33	11.4401	15.7746	21.4987	29.0173	38.8445	51.6314	68.1991	89.5795	117.064	152.261	197.166	254.233	326.468	417.511	531.729	674.274	194.538	55.8445	58.3217	60.8955	63.5695	66.3471	69.2317	72.2271	75.3371	78.5654	81.916	85.393	89.0006	92.7431	177.912	209.005	245.485	275.105	298.159	323.085	350.033	379.159	408.069
0	0	0	0	0	0	0	0	0	0	0	0	0	0	0	0	0	0	0	0	0	0	0	0	0	0	0	0	0	0	0	0	0	0	0	0	0	0	0	0	0	0	0	0	0	0	0	0	0	0
348	0	0	0	0	0	1.17733	5.65118	26.3722	56.1654	86.6367	85.093	93.6627	101.878	109.721	117.169	103.499	87.1883	114.074	142.481	196.689	253.243	311.415	423.278	670.495	540.534	676.258	671.409	791.889	883.471	976.001	1069.41	1163.62	1258.56	1354.16	1450.33	1546.98	1644.03	1741.39	1838.97	1936.66	2195.59	2455.37	2618.06	2746.6	2905.44	3125.32	3376	3734.68	4045.47
352	0	0	0	0	0	0	0	0	0	0.180543	0.350046	0.392366	0.434518	0.47633	0.517603	0.558103	0.597555	0.635633	0.671944	1.72974	3.54034	5.0398	5.08884	5.09771	4.33567	4.2503	3.41447	3.17847	3.24663	3.31414	3.38077	3.4463	3.51047	3.57297	3.63346	3.69157	3.74686	3.79883	3.84691	3.9715	4.09407	4.21341	4.32804	4.4361	4.3979	4.34692	4.28093	4.19707	4.06591
356	0	0	0	108.055	258.137	578.132	1243.01	2598.29	5320.42	10724.2	21349.5	22776.6	23975.4	24956.7	25732.9	26317.8	26725.4	26970.3	27067	27029.7	26872.3	26608.2	26250.1	25809.9	25299	24727.7	24106	27877.7	30375.6	33091.7	36044.6	39254.6	42743.5	46535.3	50655.7	55132.7	59996.7	65280.6	71020	77253.6	84023.2	91374.2	99355.8	101907	104511	107224	109977	112764	114863
360	0	0	0	0.0068141	0.0113568	0.393938	0.653606	1.05477	9.78606	22.7213	40.927	55.2715	73.3386	95.8942	123.841	158.241	200.343	251.608	313.75	388.769	479.003	623.328	800.914	1018.16	1509.48	2017.49	2386.44	2847.24	2975.08	3107.78	3245.5	3388.42	3536.71	3836.7	4152.06	4483.39	4831.31	5196.46	5287.64	5364.56	5428.08	5479.02	5518.16	6775.08	7930.36	8989.39	9957.31	12024.8	14045.2
364	0	0	0.198789	1.24656	13.6223	96.3841	607.22	762.846	650	720	1200	1367.57	1538.1	1710.83	1885.02	2059.92	2234.8	2121.39	1984.52	2151.41	2318.12	2510.18	2701.45	1927.21	2098.05	2267.37	2863.57	2885.48	3037.57	3132.22	3229.25	3328.69	3430.61	3535.06	3642.09	3751.77	3864.13	3979.26	4097.2	4218.02	4492.35	4770.13	5051.32	5335.86	5623.69	6533.1	7454.6	8181.1	8860.71
368	0	0	0.126949	0.635305	2.82727	19.2768	208.19	305.139	350	450	300	343.481	387.782	413.835	437.996	439.344	436.948	794.067	1172.09	1084.96	987.695	881.602	703.969	518.463	523.228	526.274	659.499	527.205	532.102	536.942	541.726	546.453	551.122	555.735	560.291	564.789	569.231	573.615	608.258	644.893	683.631	724.589	767.889	813.659	935.926	1076.42	1237.83	1423.25	1626.01
372	0	0	0	0	0	0.148074	1.06614	7.46295	15.7958	32.1552	61.889	69.2897	76.6328	83.883	90.999	97.9321	104.625	111.007	116.994	126.701	135.886	183.218	275.553	364.619	267.84	343.367	500.906	883.153	1069.94	1094.97	1118.35	1139.58	1158.1	1142.14	1121.99	1227.25	1420.87	1473.03	1608.06	1769.99	1762.99	1945.64	1334.57	1213.64	1209.64	1018.18	925.546	878.702	858.6
376	0	0	0	0	1.5552	8.74799	47.2391	62.3135	61.2642	82.7066	103.383	165.86	262.612	411.119	318.589	244.642	186.266	140.67	105.392	95.7397	85.5466	86.137	85.8362	84.5744	58.0812	67.6185	61.9368	44.4451	48.2757	52.0608	55.7952	59.4739	63.0917	66.6436	70.1244	73.5291	76.8526	80.0898	82.7433	86.2848	89.9305	93.6796	97.5311	101.483	102.434	103.332	104.172	104.951	105.005
380	0	0	0	0.706293	2.06002	4.60064	13.8239	40.6209	193.864	546.024	2970.42	3009.46	3003.08	2955.87	2872.14	2000.48	1040.72	1608.75	2201.32	2532.16	2982.06	3787.84	5020.16	7464.4	4819.71	5459.59	8092.58	8247.37	8304.75	8391.29	8477.3	8562.78	8647.74	8732.18	8816.1	8899.5	8982.38	9064.76	9146.62	9227.97	9594.83	9975.16	10369.5	10777.7	10754.7	11121.6	11594	12014.6	12438.9
384	0	0	0	0	0	0.235695	1.1879	5.82072	9.57964	15.4855	24.6768	31.5932	39.9992	50.1817	62.4793	77.2915	95.0892	116.427	141.958	172.448	208.801	252.074	303.512	364.571	436.96	522.681	624.078	743.894	759.101	774.705	790.739	807.244	824.265	841.855	860.075	878.997	898.706	919.303	940.911	963.682	987.801	1013.51	1041.1	1070.98	1103.7	1140.01	1181.02	1228.43	1277.02
388	0	0	0	0	0	0	0	0	0	0	0	0.00140018	0.00305048	0.00658125	0.0140811	0.0299109	0.0631319	0.132487	0.276571	0.574523	1.1879	2.44503	5.01004	10.2194	20.7473	41.9086	21.0457	10.5016	12.3594	14.5424	17.107	20.1192	23.6565	27.8094	32.684	38.4046	45.1164	52.9897	62.2232	64.3064	66.4449	68.6396	70.8913	73.2009	83.3913	94.9796	108.154	0	22.4637
392	0	0	0	0	0	0	0.665958	3.49628	5.57128	8.56043	12.5174	22.937	34.8841	58.9547	85.7154	136.047	190.633	287.206	373.676	494.118	522.353	568.941	483.486	555.583	707.606	926.985	1254.06	1896.44	2068.79	2076.96	2084.27	2090.69	2096.2	2086.25	2075.26	2063.21	2050.07	2035.81	2093.08	2149.03	2203.49	2256.26	2307.16	2382.77	2455.8	2617.38	2831.73	3140.18	3480.43
398	0	0	0	0	0	0	0.104966	0.153076	0.21868	0.307519	0.427109	0.596697	0.824384	1.12862	1.53345	2.07016	2.77938	3.71383	4.94179	6.55161	8.65749	11.4068	14.9897	19.6512	25.7065	33.5613	43.7367	56.9024	72.0764	91.2809	115.583	146.331	185.229	234.431	296.656	375.342	474.831	600.604	759.588	960.525	1214.46	1535.32	1940.72	2452.85	3099.76	3916.81	4948.66	6251.63	7847.44
400	0	0	0	0.302267	1.54297	7.39086	34.0181	38.285	32.1449	37.0967	39.6797	61.2708	93.4234	140.93	112.657	89.3103	70.2675	54.897	42.6031	39.3055	35.7474	36.5469	37.0871	37.3472	26.3563	32.0338	30.6081	22.9641	23.5862	23.702	23.8118	23.9156	24.0135	24.1052	24.1909	24.2705	24.3439	24.4111	24.472	24.5267	25.8167	27.1675	28.5815	30.0611	31.609	39.4581	49.2432	61.4384	76.1544
404	0	0	0	0	0	0.210935	0.956482	4.2261	6.09108	8.66112	12.1905	17.0252	23.5138	32.1807	43.7092	58.9878	79.1701	105.752	140.672	174.005	210.156	260.194	314.171	372.083	433.927	499.699	607.584	722.48	749.603	768.081	787.272	807.246	828.083	849.879	872.744	896.81	922.231	949.196	977.934	1008.73	1041.93	1077.98	1117.49	1161.22	1210.25	1266.09	1331	1408.5	1495.12
408	0	0	0	0	0	0.44362	1.99629	8.73377	11.5849	14.8068	17.9778	25.2725	35.1012	48.2612	65.7785	88.9658	119.492	159.462	211.505	245.228	279.145	341.054	459.92	346.275	402.001	452.179	548.165	650.174	715.887	754.979	795.763	838.261	882.492	928.463	976.17	1025.59	1076.7	1129.44	1183.71	1239.43	1253.28	1250.21	1245.6	1239.29	1231.1	1220.18	1213.65	1204.35	1184.39
410	0	0	0	0	0	0.443272	1.99472	8.72691	11.5662	14.7624	17.8742	26.9847	40.2487	59.4241	86.9666	126.288	182.096	260.85	371.328	429.983	488.701	595.962	801.773	601.818	695.817	778.167	935.129	1092.78	1202.04	1287.43	1377.88	1473.54	1574.54	1680.95	1792.84	1910.18	2032.88	2160.75	2293.47	2430.54	2428.43	2397.74	2361.93	2340.89	2312.2	2261.49	2200.89	2128.3	2058.75
414	0	0	0	0	0	0	0	0	0	0	0	0	0	0	0	0	0	0	0	0	0	0	0	0	0	0	0	0	0	0	0	0	0	0	0	0	0	0	52.8565	52.7833	52.6134	52.3337	51.9281	51.377	50.6556	49.732	48.5641	47.0934	44.9527
417	0	0	0	0	0.297398	1.30111	5.46468	22.3141	27.882	33.7579	39.3317	46.499	54.3354	62.8816	72.1781	82.2647	93.1791	104.956	117.627	127.792	137.991	153.847	169.9	185.996	201.96	217.591	251.519	284.852	303.83	323.774	344.956	367.448	391.329	416.679	443.585	472.138	502.434	534.575	568.666	604.821	643.159	683.805	726.891	772.556	820.946	872.218	926.532	984.06	1038.45
418	0	0	0	0	0	0	0.495483	2.16774	2.3249	2.82311	3.75576	4.50737	5.35079	6.29576	7.35297	8.53413	9.85206	11.3208	12.9557	16.131	19.5781	23.2973	27.2886	31.5521	36.0881	40.8967	53.2857	66.5414	68.5513	70.5908	72.6598	74.7584	76.8864	79.044	81.2311	83.4477	85.6939	87.9696	99.1751	110.617	122.295	134.209	146.36	158.747	171.37	184.081	208.933	235.611	241.731
422	0	0	0	0	0.435334	2.2855	11.5189	56.4428	83.7842	119.773	162.429	203.182	251.102	307.179	291.512	274.499	256.661	238.411	220.076	213.204	204.461	219.411	233.125	245.066	194.115	203.542	228.553	183.015	173.74	170.279	166.766	163.199	159.576	155.896	152.155	148.35	144.477	140.531	136.503	132.386	142.234	150.191	158.23	166.249	174.113	202.387	198.081	212.179	203.373
426	0	0	0	0	0	0	0	0	0	0	0	0	0	0	0	0	0	0	0	0	0	0	0	0	0	0	0	0	0	0	0	0	0	0	0	0	0	0	44.5627	47.4452	50.7127	54.4565	58.8005	63.9175	70.0573	77.5959	87.1292	99.6684	116.361
428	0	0	0	0	0	0	0	0.146791	0.671044	3.0197	13.4209	31.5785	36.0744	40.7933	45.7261	50.8589	56.1711	61.634	67.2083	72.8407	78.4597	83.9685	89.2357	94.0793	98.2414	101.341	102.783	101.541	118.57	138.365	161.354	188.027	218.942	254.731	296.112	343.89	398.967	462.348	535.139	605.921	685.019	773.109	870.813	978.639	1066.43	1158.41	1253.5	1349.92	1435.84
430	0	0	0	0	0	0.135364	0.730964	3.83756	6.62982	11.2728	18.9276	22.284	25.945	29.9333	34.2735	38.9918	44.1162	49.6765	55.7048	62.2351	69.3037	76.9496	85.2142	94.1418	103.78	114.178	125.39	137.474	140.582	143.79	147.107	150.543	154.11	157.823	161.698	165.753	170.012	174.502	179.256	184.316	189.731	195.568	201.909	208.866	216.591	225.297	235.299	247.085	259.835
434	0	0	0	0	1.80516	10.154	54.8318	72.3291	71.1111	96	120	152.552	189.396	188.712	184.284	211.193	240.131	271.145	304.282	332.796	362.607	270.211	163.926	260.404	366.87	483.56	508.923	534.676	504.529	515.126	525.833	536.649	547.575	558.612	569.759	581.016	592.384	603.864	615.455	674.821	689.263	703.868	718.637	733.57	748.667	763.928	818.386	944.501	987.281
438	0	0	0	0	0	0.0551015	0.226703	0.906813	1.09916	1.2833	1.42208	1.59405	1.76537	1.93532	2.1031	2.26777	2.42822	2.58312	2.7309	2.86964	2.99698	3.10999	3.20488	3.27672	3.31872	3.32117	3.26913	3.13705	3.22126	3.30565	3.39003	3.47415	3.55774	3.6405	3.72208	3.80207	3.88001	3.95537	4.02754	4.09579	4.1593	4.21707	4.26793	4.31049	4.34302	4.36344	4.36911	4.35665	4.29461
440	0	0	0	0	0	0	0.0375228	0.175106	0.800486	3.60219	16.0097	37.6699	43.0967	48.8144	54.8184	61.099	67.641	74.4218	81.4094	88.5597	95.8133	103.09	110.283	117.247	123.783	129.617	134.352	137.391	161.174	189.005	221.562	259.632	304.13	356.119	416.832	487.702	570.387	666.81	779.193	891.535	1019.6	1165.48	1331.57	1520.51	1687.09	1870.81	2073.23	2296.02	2525.06
442	0	0	0	0	0	0.124657	0.673146	3.53402	5.62181	8.61361	12.5244	14.0385	15.5464	17.0421	18.5185	19.9671	21.3781	22.7398	24.0381	25.2561	26.3728	27.3621	28.1903	28.8133	29.1707	29.1752	28.6924	27.491	29.0896	30.7615	32.5074	34.3279	36.2228	38.1915	40.2324	42.3427	44.5187	46.7549	49.0438	54.1848	59.7748	65.8302	72.3594	79.3598	78.6485	81.9107	84.6755	86.8433	87.7308
446	0	0	0	0	0	0	0	0	0	0	0	0	0	0	0	0	0	0	0	0	0	0	0	0	0	0	0	0	0	0	0	0	0	0	0	0	0	0	0	0	0	0	0	0	0	0	0	0	0
450	0	0	0	0	0	0	0	0	0	0	0	0.0948995	0.209416	0.457927	0.993759	2.14276	4.59487	9.80613	20.8404	33.096	46.5657	69.4082	94.257	121.1	149.926	205.144	259.22	316.82	327.075	336.049	345.426	355.246	365.559	376.421	387.897	400.066	413.021	426.877	441.772	457.879	475.416	494.66	515.978	539.86	566.982	598.316	635.311	680.27	732.523
454	0	0	0	0	0	0.0522217	0.235729	1.03473	1.4498	1.99671	2.71129	3.6934	4.97538	6.6414	8.79805	11.5801	15.158	19.7463	25.6159	31.8463	38.5808	48.652	59.4895	71.085	83.4302	96.5166	108.831	121.757	125.297	129.33	133.581	138.074	142.838	147.904	153.313	159.11	165.352	172.106	179.458	187.513	196.405	206.309	217.455	230.157	244.852	262.18	283.113	309.223	341.124
458	0	0	0	0	0	0	0.0462604	0.202389	0.286042	0.400462	0.555537	0.931296	1.54392	2.53635	4.13523	6.69889	10.7924	17.3047	27.6312	30.9335	34.4218	43.3933	53.094	63.524	74.6832	86.5717	112.819	140.908	147.738	154.699	161.791	169.012	176.364	183.846	191.458	199.201	207.074	215.077	228.488	242.152	256.068	270.238	284.661	374.171	465.578	558.871	865.26	972.983	1248.48
462	0	0	0	0	0	0	0	0	0	0	0	0.00128284	0.00208813	0.0033645	0.0053736	0.00851589	0.0134008	0.02095	0.0325476	0.0502561	0.0771187	0.117571	0.177974	0.267235	0.397367	0.583509	0.841984	1.18203	1.20452	1.22659	1.24818	1.26917	1.28947	1.30896	1.32751	1.34495	1.36111	1.3758	1.38877	1.44665	1.50439	1.56143	1.61705	1.6703	1.81557	1.96613	2.11939	2.27122	2.40002
466	0	0	0	0	0	0.170522	0.92082	4.8343	7.99423	12.9564	20.6241	26.2129	32.9446	41.0263	50.7002	62.2491	76.0028	92.3459	111.726	124.378	137.614	155.025	173.313	195.839	226.322	254.4	307.458	363.347	374.465	383.375	392.621	402.236	412.26	422.737	433.72	445.271	457.466	470.392	484.16	498.903	514.791	532.039	550.924	571.821	595.238	621.898	652.872	689.834	731.007
470	0	0	0	0	0	0	0	0	0	0	0	0.107379	0.146204	0.19713	0.263592	0.349923	0.461569	0.60534	0.789714	1.02518	1.32462	1.36302	1.39621	2.84738	1.44481	2.91758	5.85843	10.2267	10.6106	10.9978	11.3881	11.7815	12.1776	12.883	13.5953	14.3142	15.0392	15.77	16.8237	17.8863	18.9572	24.304	24.1816	24.9571	25.4446	25.6344	25.5168	25.082	25.6518
474	0	0	0	0	0	0	0	0	0	0	0	0.00041442	0.000899721	0.00193362	0.00411941	0.00870851	0.0182818	0.0381313	0.079045	0.162877	0.333597	0.678981	1.37262	2.75377	5.47491	10.7618	5.20751	2.46204	2.87794	3.36218	3.92557	4.58049	5.34119	6.22392	7.24722	8.43217	9.80267	11.3857	13.2114	13.5786	13.9397	14.292	14.6322	14.9563	15.8047	16.666	17.5313	18.3882	19.0999
478	0	0	0	0	0	0.0723886	0.347465	1.6215	2.37602	3.4094	4.79898	6.09569	7.65626	9.52821	11.767	14.4372	17.6144	21.386	25.8541	28.7586	31.7926	35.784	39.9694	46.2997	52.4825	58.4985	70.6245	83.3707	85.3375	86.9734	88.6513	90.3755	92.1503	93.9813	95.8745	97.8373	99.8783	102.008	104.238	106.585	109.067	111.708	114.539	117.601	120.948	124.658	128.842	133.672	138.561
480	0	0	0	0	0	0	0	0	0	0	0	0.00993638	0.0144091	0.0206887	0.0294536	0.0416215	0.0584276	0.0815256	0.113118	0.156117	0.214345	0.292773	0.397781	0.537433	0.721675	0.962342	1.27264	1.66548	2.09599	2.63698	3.31661	4.17013	5.2417	6.58659	8.274	10.3904	13.0441	16.3702	20.5377	25.7575	32.2931	33.6132	33.3725	42.0539	43.3905	49.1808	50.9085	51.1693	50.7347
484	0	0	0	0	0	3.49592	13.5533	42.9782	307.131	441.484	639.79	769.661	915.635	1079.42	1262.87	1468.06	1697.21	1952.81	2237.55	2789.97	3406.94	4152.8	4978.76	5888.82	6887.13	7977.99	339.476	1442.12	1616.26	1800.25	1994.5	2199.41	2415.42	2642.96	2882.49	3134.48	3399.42	3677.79	3970.14	4276.99	4598.89	4936.42	5290.16	5660.74	6048.77	6452.93	8015.84	9763.76	11294.8
492	0	0	0	0	0	0	0	0	0	0	0	0	0	0	0	0	0	0	0	0	0	0	0	0	0	0	0	0	0	0	0	0	0	0	0	0	0	0	0	0	0	0	0	0	0	0	0	0	0
496	0	0	0	0	0	0	0	0	40.8603	61.0551	90.3738	103.039	116.177	129.804	143.933	158.58	173.761	189.491	205.789	225.496	245.855	333.552	427.306	471.445	344.815	356.574	368.067	379.297	378.442	380.895	383.299	385.655	387.963	390.224	392.438	394.607	396.729	398.807	400.84	402.829	407.053	414.511	422.053	429.678	437.389	449.529	494.85	544.68	595.713
498	0	0	0	0	0	1.25825	5.28465	21.579	26.7165	31.8729	36.1249	42.5312	49.4739	56.9701	65.0323	73.666	82.8675	92.6203	102.891	113.624	124.176	189.666	287.779	288.943	287.587	377.518	457.869	579.726	383.198	415.957	451.268	489.296	530.211	574.187	621.398	672.019	726.222	784.173	846.023	911.91	981.941	1056.19	1134.69	1217.38	1304.15	1394.74	1488.75	1585.56	1673.73
500	0	0	0	0	0	0	0	0	0	0	0	6.34364e-06	1.39529e-05	3.0409e-05	6.5767e-05	0.000141316	0.000301959	0.000642092	0.00135956	0.00286786	0.00602917	0.012637	0.0264145	0.0550757	0.114575	0.237855	0.492828	1.0193	1.11683	1.22347	1.34007	1.46754	1.60687	1.75916	1.92558	2.10743	2.30612	2.52318	2.76028	2.88354	3.0119	3.14556	3.28473	3.42964	3.58448	3.74586	3.91405	4.08933	4.24528
504	0	0	0	0	4.51577	25.4012	137.166	180.937	177.89	240.152	300.19	349.334	401.743	457.493	516.644	579.24	645.305	714.834	787.797	880.094	972.482	940.411	903.353	1019.01	918.498	767.67	1150.83	891.416	939.435	988.036	1037.2	1086.93	1137.18	1187.97	1239.26	1291.05	1343.32	1396.06	1449.25	1502.87	1784	2068.49	2356.26	2647.23	2941.29	3238.37	3538.38	3841.23	4120.9
508	0	0	0	0	0	0.0682659	0.34406	1.68589	2.61246	3.97147	5.93784	7.43441	9.20454	11.2921	13.7477	16.6291	20.0028	23.9451	28.5432	43.313	59.4386	91.4443	126.1	163.355	203.161	245.465	318.219	395.343	413.657	432.3	451.271	470.569	490.194	510.145	530.421	551.023	571.949	593.199	614.772	636.668	659.272	740.443	831.502	933.643	1002.35	1075.97	1154.88	1239.43	1321.7
512	0	0	0	0	0	0	0	0	0	0	0	0	0	0	0	0	0	0	0	0	0	0	0	0	0	0	0	0	0	0	0	0	0	0	0	0	0	0	125.579	125.739	127.531	129.288	130.75	131.85	132.501	132.401	134.764	136.224	135.56
516	0	0	0	0	0	0	0	0	0	0	0	0	0	0	0	0	0	0	0	0	0	0	0	0	0	0	0	0	0	0	0	0	0	0	0	0	0	0	227.216	240.871	255.358	270.729	287.04	304.351	322.725	342.228	362.932	384.914	405.704
520	0	0	0	0	0	0	0	0	0	0	0	0	0	0	0	0	0	0	0	0	0	0	0	0	0	0	0	0	0	0	0	0	0	0	0	0	0	0	0	0	0	0	0	0	0	0	0	0	0
524	0	0	0	0	0	3.72012	16.7405	73.2398	95.1166	121.598	153.533	162.691	170.485	177.032	182.441	186.812	190.237	192.805	194.593	194.325	193.194	197.466	200.515	202.424	203.28	203.172	240.702	273.302	298.447	325.817	355.604	388.018	423.284	461.648	503.378	548.761	598.111	651.768	710.101	788.602	841.252	970.951	1004.95	1019.02	1034.15	1111.57	1101.05	1129.07	1320.57
528	0	0	0	0	0	0	0.432663	1.00955	2.30753	5.19195	11.5377	12.281	12.9274	13.4843	13.9589	14.3578	14.6869	14.9522	26.9621	37.1759	43.2303	54.6805	64.6702	119.998	89.6994	141.656	197.696	257.818	265.523	273.34	281.269	289.311	297.465	305.731	314.11	322.6	331.203	339.919	348.747	357.687	398.784	442.936	483	526.184	573.147	637.791	707.261	795.243	812.933
530	0	0	0	0	0	0	0	0	0	0	0	1.13e-05	2.45252e-05	5.26895e-05	0.000112207	0.000237102	0.000497497	0.00103705	0.0021483	0.0044231	0.00905034	0.0183984	0.0371382	0.0743626	0.147459	0.288788	0.555838	0.935096	1.01234	1.09524	1.18407	1.27916	1.38077	1.48919	1.60464	1.72731	1.85735	1.99481	2.13962	2.18859	2.23498	2.27809	2.31705	2.74801	2.89748	3.27921	3.47741	3.57677	3.63275
533	0	0	0	0	0	0	0	0	0	0	0	1.15081e-06	2.49762e-06	5.36573e-06	1.14265e-05	2.41444e-05	5.06588e-05	0.000105596	0.000218737	0.000450329	0.000921383	0.00187293	0.00378021	0.00756818	0.0150048	0.0293782	0.0565224	0.105801	0.114529	0.123894	0.133928	0.144664	0.156135	0.168368	0.181391	0.195222	0.209876	0.225356	0.241653	0.24711	0.252263	0.257029	0.261304	0.292239	0.350447	0.557283	0.650281	0.807412	0.753496
540	0	0	0	0	0	0	0	0.116801	0.247688	0.505831	0.979983	1.19596	1.44198	1.72098	2.03599	2.38997	2.78576	3.22584	3.71214	4.24555	4.82547	5.4489	6.10918	6.79395	7.48172	8.13582	8.69231	9.03226	9.51129	10.0088	10.5247	11.0586	11.6101	12.1783	12.7621	13.3601	13.9703	14.5903	15.2168	15.8898	16.5637	17.232	17.8861	18.5152	18.7237	18.8609	18.9072	18.836	18.4936
548	0	0	0	0	0	0	0	0	0	0	0	0	0	0	0	0	0	0	0	0	0	0	0.0506872	0.0799603	0.125864	0.197723	0.31004	0.485339	0.517833	0.552407	0.589189	0.628317	0.669936	0.714201	0.761273	0.811328	0.864547	0.921127	0.981274	1.04811	1.11935	1.19528	1.27619	1.36242	1.42526	1.49083	1.55923	1.63058	1.69436
554	0	0	0	0	0	0	0	0	0	0	0	0	0	0	0	0	0	0	0	0	0	0	0	0	0	0	0	0	0	0	0	0	0	0	0	0	0	0.283084	0.567156	1.33875	3.15966	7.45632	17.5936	41.5078	108.541	198.276	361.909	634.171	839.278
558	0	0	0	0	0	1.09648	4.38591	17.0563	20.2342	23.2182	25.5393	30.7032	36.4796	42.9203	50.0791	58.0103	66.7681	76.4053	86.9709	98.5079	111.05	124.614	139.2	154.772	171.253	188.503	94.5489	47.1067	50.9053	54.997	59.4035	64.148	69.2552	74.7518	80.6661	87.0285	93.8713	101.229	109.139	117.64	140.212	164.494	192.937	205.884	218.909	250.689	287.772	330.262	376.568
562	0	0	0	0	0	0.587119	2.81817	13.1515	20.0403	30.0605	44.5341	56.8838	71.8533	89.9388	111.725	137.901	169.275	206.799	251.59	281.662	313.428	355.148	399.409	465.289	521.711	597.208	726.391	864.045	891.653	910.977	930.902	951.487	972.796	994.905	1017.9	1041.89	1067	1093.37	1121.18	1150.65	1182.07	1215.76	1252.19	1291.94	1335.82	1384.97	1441.03	1506.58	1575.96
566	0	0	0	0	0	0.760671	3.83378	18.7855	30.6002	49.0218	77.4998	115.672	170.731	249.711	362.463	522.755	749.789	1070.3	1521.46	1939.34	2395.47	2709.39	3042.77	3595.46	4186.97	4817.48	6401.65	8579.2	8797.66	8981.33	9170.27	9364.96	9565.97	9773.95	9989.64	10213.9	10447.9	10692.8	10950.1	11221.7	11509.9	11817.7	12148.8	12508.3	12902.7	13341.7	13839	14416	15013.2
570	0	0	0	0	0	0	0	0	0	0	0	0.000384928	0.000639113	0.00105152	0.00171694	0.0027855	0.00449427	0.00721674	0.0115401	0.0183856	0.0291959	0.0462266	0.072999	0.115002	0.180779	0.283617	0.444146	0.694372	0.740766	0.790122	0.842625	0.89847	0.957861	1.02102	1.08818	1.15958	1.23548	1.31617	1.40194	1.49723	1.5988	1.70703	1.82237	1.94525	2.07617	2.21563	2.317	2.42273	2.51717
574	0	0	0	0	0	0	0	0	0	0	0	0	0	0	0	0	0	0	0	0	0	0	0	0	0	0	0	0	0	0	0	0	0	0	0	0	0	0	0	0	0	0	0	0	0	0	0	0	0
578	0	0	0	0	0	0	0	0	0.163345	0.735053	16.3345	40.1637	47.4481	55.0859	62.9984	71.0966	79.2797	87.4312	95.4143	103.065	110.184	146.884	181.338	207.567	100.145	191.509	226.528	254.166	263.797	273.711	283.91	294.401	305.188	316.275	327.667	339.367	351.379	363.707	376.354	411.349	466.489	524.097	594.584	671.512	736	774.938	817.014	901.271	941.598
580	0	0	0	0	0	0	0	0	0	0	0	5.31455e-05	8.6999e-05	0.000141055	0.000226845	0.000362264	0.00057498	0.000907622	0.00142564	0.00222918	0.00347097	0.00538303	0.00831656	0.012801	0.0196309	0.0299925	0.0456468	0.0691889	0.0735727	0.0782183	0.0831408	0.0883559	0.0938802	0.0997311	0.105927	0.112488	0.119433	0.126785	0.134567	0.143198	0.152357	0.162075	0.172385	0.18332	0.194919	0.207218	0.215861	0.22483	0.232672
583	0	0	0	0	0	0	0	0	0	0	0	0	0	0	0	0	0	0	0	0	0	0	0	0	0	0	0	0	0	0	0	0	0	0	0	0	0	0	0	0	0	0	0	0	0	0	0	0	0
584	0	0	0	0	0	0	0	0	0	0	0	0	0	0	0	0	0	0	0	0	0	0	0	0	0	0	0	0	0	0	0	0	0	0	0	0	0	0	0	0	0	0	0	0	0	0	0	0	0
585	0	0	0	0	0	0	0	0	0	0	0	0.00686873	0.00943279	0.0128351	0.0173305	0.0232479	0.0310108	0.0411637	0.0544061	0.0716345	0.0939969	0.122961	0.160402	0.208711	0.270935	0.350953	0.453693	0.585416	0.623921	0.664844	0.708329	0.754532	0.80362	0.855764	0.911152	0.969978	1.03245	1.09879	1.16922	1.24746	1.33075	1.41941	1.51379	1.61424	1.68679	1.76238	1.84114	1.9232	1.99614
586	0	0	0	13.4634	27.1987	51.5127	93.6594	165.56	286.683	488.665	822.668	897.326	963.375	1032.99	1093.65	1145.35	1188.25	1279.26	1358.5	1468.3	1563.37	1556.44	1543.29	1471.43	1585.4	1601.42	1973.12	2297.79	2474.36	2692.1	2929.83	3189.42	3472.89	3782.49	4120.63	4490	4893.52	5334.37	5816.05	6466.14	6810.83	7700.45	7807.42	7769.44	7749.45	8075.02	7773.59	7993.94	8952.61
591	0	0	0	0	0	0.503369	2.00994	7.80337	9.20649	10.482	11.3779	13.9069	16.7964	20.0846	23.8117	28.0192	32.7492	38.0427	43.938	50.4679	57.6556	65.5087	74.0108	83.1086	92.6917	102.561	50.5699	24.6161	26.0614	27.5821	29.1814	30.8625	32.6288	34.4836	36.4303	38.4723	40.6131	42.8559	45.204	50.6043	56.6251	63.3334	70.8031	81.5359	92.2163	101.111	117.744	137.03	174.116
598	0	0	0	0.145674	0.874042	1.63883	8.84967	46.4608	73.904	113.223	164.597	189.408	215.339	242.343	270.347	299.253	328.925	359.182	389.785	420.417	450.662	479.97	507.598	532.533	553.347	567.949	573.069	563.077	565.409	567.379	568.962	570.133	570.863	571.121	570.871	570.073	568.682	566.648	563.911	560.405	556.051	550.755	544.407	536.874	527.284	516.164	503.255	488.214	467.628
600	0	0	0	0	0	0.150189	0.63239	2.60111	3.26381	3.97081	4.62471	6.27135	8.40592	11.1582	14.6894	19.1981	24.928	32.1756	41.2981	44.9937	48.6069	59.5144	70.4111	81.0536	91.1381	100.27	98.1002	94.387	99.5296	104.67	109.802	114.916	120.005	125.06	130.072	135.031	139.927	144.749	163.95	183.017	201.909	220.58	238.982	247.542	255.815	263.764	271.346	278.513	354.129
604	0	0	0	0	2.77572	12.4907	53.96	226.632	288.392	353.446	411.024	478.807	551.061	627.799	708.967	794.429	883.944	977.13	1073.42	1243.25	1413.4	1532.61	1643.74	1742.79	1824.41	1881.21	588.715	637.034	630.609	623.837	616.707	609.21	601.333	593.061	584.377	575.262	565.691	555.637	545.066	533.939	614.105	692.67	779.678	881.18	976.151	1127.54	1445.16	1666.57	1754.69
608	0	0	0	0	0	0.291424	1.25895	5.28759	6.19776	7.78207	10.1682	11.3548	12.5409	13.7265	14.912	16.0974	17.2828	18.4682	19.6538	20.8395	22.0254	41.7807	63.4342	86.9864	112.438	139.789	233.158	379.149	407.92	437.314	467.333	497.974	529.24	561.13	593.643	626.78	660.541	694.925	729.934	765.566	892.626	1083.32	1314.58	1596.15	1883.59	2168.95	2420.81	2721.31	3234.32
612	0	0	0	0	0	0	0	0	0	0	0	0	0	0	0	0	0	0	0	0	0	0	0	0	0	0	0	0	0	0	0	0	0	0	0	0	0	0	0	0	0	0	0	0	0	0	0	0	0
616	0	0	0	0	0	0.121102	0.302754	0.798156	2.85056	6.67915	46.383	71.2798	107.431	171.592	266.446	314.74	362.201	508.483	665.618	780.159	898.599	1112.19	1711.61	2715.93	2752.08	3161.1	3927.82	4607.71	4828.28	5084.98	5352.73	5631.71	5922.09	6223.92	6537.22	6861.89	7197.71	7544.33	7901.16	8267.42	8762.5	9461.07	10202.2	11647.6	13052.3	15218.6	17297.5	18443.8	19348.6
620	0	0	0	0	0.200724	1.12907	6.09698	32.0091	50.9568	78.1711	113.944	139.125	151.053	162.352	172.983	164.607	153.632	160.28	166.2	214.151	263.332	335.234	407.006	567.727	406.994	585.931	907.471	888.268	1158.84	1199.68	1227.38	1254.99	1282.46	1311.51	1340.27	1368.63	1396.48	1423.72	1447	1469.77	1540.34	1615.77	1645.97	1753.55	1880.01	2015.48	2187.42	2306.97	2448.33
624	0	0	0	0	0	0	0.0516328	0.271072	0.462074	0.775276	1.28458	1.63984	2.07015	2.58967	3.21508	3.96596	4.86536	5.94034	7.22264	8.74946	10.5644	12.7186	15.2717	18.2938	21.8663	26.085	31.0611	36.9248	37.9923	39.1091	40.2801	41.5111	42.8086	44.1805	45.6359	47.1858	48.8432	50.6239	52.5476	54.6384	56.9271	59.4531	62.2686	65.4434	69.0751	73.3035	78.34	84.5216	91.8531
626	0	0	0	0	0	0	0	0	0	0.187819	0.254102	0.354604	0.489447	0.669525	0.909034	1.22644	1.64574	2.19805	2.92368	3.87478	5.11875	6.7426	8.85855	11.6112	15.1866	19.8242	25.8317	33.6041	34.6824	35.7891	36.925	38.0906	39.2867	40.514	41.7734	43.0655	44.3911	45.751	47.1461	51.8412	56.9964	62.6561	68.8691	75.6889	79.8471	84.2237	88.83	93.6776	98.1614
630	0	0	0	0	0	0	0	0	0	0	0	0.00121956	0.00198877	0.00321097	0.00514014	0.00816698	0.0128896	0.0202187	0.0315344	0.048915	0.0754703	0.115818	0.176748	0.268131	0.404078	0.604297	0.8953	1.31041	1.71786	2.25125	2.94927	3.86242	5.05656	6.6176	8.6575	11.3221	14.8015	19.3428	25.2678	32.9945	39.905	46.8194	58.8747	71.8344	86.1381	100.678	114.934	130.691	159.698
634	0	0	0	0	0	0	0	0	0	0	0	0	0	0	0	0	0	0	0	0	0	0	0	0	0	0	0	0	0	0	0	0	0	0	0	0	0	0	5.47655	5.69195	5.90495	6.11304	6.31298	6.50066	6.40942	6.29261	6.14489	5.95889	5.68812
638	0	0	0	0	0	0	0	0	0	0	0	0.0201186	0.0273777	0.0368913	0.0492958	0.0653924	0.086185	0.112926	0.147167	0.190821	0.246226	0.31621	0.404152	0.514023	0.650375	0.818233	1.0228	1.26879	1.53491	1.85638	2.2446	2.71333	3.27913	3.96193	4.78571	5.77935	7.46312	9.16497	10.7928	12.3746	13.6326	15.9955	16.8697	25.4609	28.4885	28.2998	26.2435	27.2011	27.2913
642	0	0	0	0	0	1.8656	11.1936	65.2958	207.745	353.678	548.573	602.596	653.984	614.753	561.134	543.525	518.459	594.509	671.887	807.136	943.993	1079.83	1211.47	1820.33	1505.17	2360.76	2275.67	2671.83	3199.92	3429.73	3673.56	3931.93	4205.31	4494.08	4798.56	5118.93	5455.22	5807.24	6174.55	6556.38	7196.39	7553.88	7914.07	8360.42	8767.91	9136.66	9450.77	9725.87	10059.9
643	0	0	0	0	0	12.1637	17.0291	23.1785	30.9047	294.463	381.711	479.946	589.407	710.095	842.01	909.371	976.732	1131.1	1296.7	1473.52	1661.57	2627.07	4142.69	4496.5	4705.64	6331.92	8251.7	9733.64	11173.1	12647.1	14155.5	15698.4	17323.3	18952.6	20622.2	22334	24090.7	25895.3	27694.4	29766.5	32074.4	38408.3	42019.1	48809.8	53462.6	62279.6	72441	82297.5	103182
646	0	0	0	0	0	0	0.0585115	0.273054	0.391381	0.544641	0.732313	1.17695	1.86983	2.94238	4.59299	7.12004	10.9709	16.814	25.6451	33.4667	41.7571	52.625	63.9876	75.7632	87.8622	100.185	112.211	124.211	127.049	129.838	132.728	135.731	138.859	142.125	145.548	149.147	152.946	156.975	161.267	165.868	170.832	176.228	182.148	188.713	196.091	204.518	214.345	226.126	239.284
654	0	0	0	0	0	0	0	0	0	0	0	0.000409776	0.000565191	0.000772472	0.00104778	0.0014121	0.00189264	0.00252462	0.00335358	0.00443832	0.0058547	0.00770045	0.0101014	0.0132192	0.0172618	0.0224958	0.0292636	0.0380037	0.0481293	0.0609421	0.077153	0.0976599	0.123598	0.1564	0.197877	0.250317	0.316609	0.400399	0.506295	0.64011	0.809187	1.02279	1.29262	1.63342	1.83452	2.06014	2.24682	2.43695	2.05336
659	0	0	0	0	0	0	0	0	0	0	0	1.79392e-05	3.94228e-05	8.58398e-05	0.000185475	0.000398149	0.000849894	0.00180534	0.00381846	0.00804566	0.0168949	0.0353684	0.0738357	0.15375	0.319413	0.662153	1.36993	2.82901	3.09919	3.39459	3.71751	4.07047	4.45622	4.87776	5.33834	5.84154	6.39122	6.99163	7.64736	7.98752	8.34168	8.7104	9.48226	9.55088	11.386	11.9654	12.9142	13.0405	13.3747
660	0	0	0	0	0	0	0	0	0	0	0	0	0	0	0	0	0	0	0	0	0	0	0	0	0	0	0	0	0	0	0	0	0	0	0	0	0	0	0	0	0	0	0	0	0	0	0	0	0
662	0	0	0	0	0	0	0	0	0	0	0	0.0300485	0.0356812	0.0419546	0.0489184	0.0566224	0.0651152	0.0744428	0.0846459	0.0957575	0.107798	0.12077	0.13465	0.149377	0.164836	0.180835	0.197069	0.213057	0.232355	0.253335	0.276137	0.300915	0.327833	0.357067	0.38881	0.423266	0.460659	0.501226	0.545227	0.566285	0.588004	0.610396	0.633473	0.657247	0.682486	0.708501	0.735301	0.762899	0.786357
666	0	0	0	0	0	0	0	0	0	0	0	4.53492e-06	1.0038e-05	2.20175e-05	4.7928e-05	0.000103662	0.000222976	0.000477336	0.0010176	0.00216136	0.00457569	0.00965857	0.020334	0.0427067	0.0895008	0.187196	0.39082	0.814576	0.893209	0.979262	1.07343	1.17645	1.28916	1.41244	1.54727	1.69473	1.85597	2.03226	2.22498	2.32618	2.43165	2.54158	2.65614	2.77552	2.90315	3.03628	3.17516	3.32	3.44938
670	0	0	0	0	0	0	0	0	0	0	0	2.33963e-05	5.08383e-05	0.000109364	0.000233242	0.000493681	0.00103783	0.00216812	0.00450278	0.00929848	0.0190942	0.0389856	0.0791201	0.159517	0.319204	0.633028	1.24112	2.39551	2.60395	2.8294	3.07311	3.33641	3.62073	3.92755	4.25844	4.61504	4.99908	5.41234	5.85667	6.04928	6.2446	6.44229	6.64193	6.84305	7.05291	7.26347	7.47395	7.68343	7.84152
674	0	0	0	0	0	0	0	0	0	0	0	0.00408582	0.00460807	0.00514993	0.00571199	0.00629485	0.00689912	0.00752543	0.00817443	0.00884678	0.00954317	0.0102643	0.0110109	0.0117837	0.0125834	0.0134109	0.0142669	0.0151523	0.0161625	0.017237	0.0183798	0.0195952	0.0208876	0.0222618	0.0237228	0.0252759	0.0269268	0.0286814	0.0305461	0.0325277	0.0346333	0.0368703	0.039247	0.0417716	0.0444533	0.0473016	0.0503265	0.0535388	0.084891
678	0	0	0	0	0	0	0	0	0	0	0	0.0264756	0.0365945	0.050122	0.0681309	0.0920176	0.123597	0.165225	0.219953	0.291733	0.385675	0.508377	0.668353	0.876581	1.14719	1.49838	1.95354	2.5427	2.80164	3.09025	3.41209	3.77114	4.17187	4.6193	5.11904	5.67739	6.3014	6.99896	7.77896	8.6513	9.62712	10.7189	11.9405	13.3078	14.8381	16.5511	18.4688	20.6159	22.876
682	0	0	0	0	0	0	0	0	0	0	0	0	0	0	0	0	0	0	0	0	0	0	0	0	0	0	0	0	0	0	0	0	0	0	0	0	0	0	892.779	889.857	910.301	920.119	928.64	935.647	940.879	954.344	968.195	979.186	980.393
686	0	0	0	0	0	0.0345134	0.165664	0.773099	1.22019	1.88939	2.8815	4.03678	5.59246	7.67722	10.4592	14.1578	19.0587	25.5336	34.0652	45.2795	59.9879	79.2403	104.394	137.203	179.93	235.491	307.647	401.234	412.457	424.171	436.426	449.276	462.786	477.033	492.104	508.106	525.164	543.432	563.097	584.392	607.611	633.13	661.444	693.216	729.367	771.213	820.729	907.09	1138.91
690	0	0	0	0	0	0	0	0	0	0	0	0.0247046	0.033555	0.0451211	0.0601537	0.0795902	0.104594	0.136597	0.177352	0.228971	0.293974	0.375303	0.476296	0.600577	0.751766	0.932859	1.14494	1.3845	1.41979	1.45541	1.49134	1.52755	1.56401	1.60066	1.63748	1.6744	1.71137	1.74833	1.78521	1.84707	1.91004	1.97406	2.03901	2.10477	2.20931	2.31739	2.4289	2.54371	2.64494
694	0	0	0	0	0	0	0	0	0.187669	0.255528	0.330091	0.40285	0.485734	0.579737	0.685877	0.80516	0.938544	1.08688	1.2508	1.43065	1.62623	1.83655	2.0594	2.29068	2.52324	2.74486	2.93431	3.05218	3.3931	3.76956	4.18478	4.64222	5.14552	5.69845	6.30494	6.96895	7.69444	8.48522	9.3448	10.2762	11.2814	12.1275	13.0087	13.9206	20.8007	30.992	46.0296	68.1208	99.7846
702	0	0	0	0	0	0	0	0	0	0	0	0.000615407	0.00100166	0.0016138	0.00257727	0.00408399	0.00642597	0.0100447	0.0156031	0.0240882	0.036956	0.0563268	0.0852374	0.127933	0.190122	0.278954	0.402011	0.56311	0.728856	0.94272	1.21843	1.57351	2.03036	2.61745	3.37098	4.33677	5.57272	7.15162	9.16463	11.7252	14.9738	19.082	24.258	30.7489	38.8417	48.8558	61.1229	75.9379	92.8675
703	0	0	0	0	0	0.449374	2.69624	15.7281	27.8438	47.5268	77.1866	84.9417	92.3611	99.4228	106.102	112.372	118.199	123.546	128.37	149.046	169.943	208.054	281.27	424.888	353.805	420.261	616.465	536.992	561.245	586.344	612.297	639.112	666.794	695.342	724.754	755.022	786.134	818.069	850.8	901.107	953.762	1008.79	1066.2	1125.98	1165	1204.25	1243.56	1282.71	1308.29
704	0	0	0	0	0	0.483964	2.33455	10.9551	12.3898	15.9768	22.7637	27.3296	32.4564	38.2043	44.6391	51.833	59.8651	68.822	78.7987	88.1634	98.0548	134.301	173.701	216.259	261.976	310.854	405.014	505.761	563.048	621.663	681.606	742.879	805.479	869.408	934.665	1001.25	1069.17	1138.41	1208.98	1280.88	1452.89	1628.47	1807.62	1990.34	2176.63	2658.07	3308.1	4018.07	4759.53
705	0	0	0	0	0	0.274022	1.56676	8.70936	14.6672	23.7883	36.6037	41.6936	46.9201	52.2669	57.7134	63.2334	68.7943	74.3552	79.8644	85.257	90.4499	95.3364	99.7758	103.58	106.485	108.11	107.858	104.697	109.025	113.456	117.982	122.596	127.287	132.043	136.848	141.686	146.533	151.362	156.141	163.889	171.731	179.605	187.425	195.082	211.498	228.449	245.632	262.575	276.798
706	0	0	0	0	0	0	0	0	0	0	0	0	0	0	0	0	0	0	0	0	0	0	0	0	0	0	0	0	0	0	0	0	0	0	0	0	0	0	276.373	282.302	302.067	317.99	334.709	352.262	374.594	398.292	423.441	450.126	475.448
710	0	0	0	0	0	0	0	0	0	0	0	0	0	0	0	0	0	0	0	0	0	0	0	0	0	0	79.8917	237.579	472.397	469.489	466.339	462.949	459.319	455.447	451.333	446.979	442.383	437.545	432.465	427.144	421.58	415.774	495.003	617.183	827.778	1656.39	2055.47	2898	3904.81
716	0	0	0	0	0	0.0409096	0.220912	1.15979	1.99742	3.38606	5.66889	7.24416	9.15461	11.4639	14.2472	17.593	21.6052	26.4062	32.1398	40.0937	48.7397	51.3969	54.0564	56.7183	59.3824	124.098	140.437	157.689	162.531	167.823	173.403	179.301	185.555	192.207	199.309	206.922	215.118	223.988	233.643	244.22	255.896	268.899	283.531	300.203	319.489	342.226	369.687	403.931	445.768
724	0	0	0	0.135784	0.864699	4.52823	21.9344	128.206	286.1	716.985	806.517	958.042	1025.75	1084.62	1067.3	1026.61	1161.75	1306.09	1459.75	1622.81	1958.5	2558.71	3717.24	2895.1	3622.93	5002.15	4956.51	5871.46	6119.76	6377.36	6644.58	6921.74	7209.18	7507.27	7816.34	8136.79	8468.98	8813.31	9170.2	9919.64	10023.2	10987.6	12125	12704.2	13284.8	13802.5	14208.4	15255.1	16002.9
732	0	0	0	0	0	0	0	0	0	0	0	0	0	0	0	0	0	0	0	0	0	0	0	0	0	0	0	0	0	0	0	0	0	0	0	0	0	0	0	0	0	0	0	0	0	0	0	0	0
736	0	0	0	0	0	1.71267	10.2951	60.1877	118.962	230.836	441.488	511.263	585.492	664.402	748.23	837.225	931.645	1031.76	1137.86	1302.97	1479.55	1615.57	1757.58	2001.88	2261.69	2537.12	2850.35	3181.31	3251.58	3319.21	3388.76	3460.4	3534.32	3610.76	3690.01	3772.36	3858.21	3948.01	4042.29	4141.74	4247.19	4359.69	4480.59	4611.7	4755.42	4915.15	5095.84	5305.12	5520.83
740	0	0	0	0	0	0	0	0.12906	0.273677	0.558879	1.08266	1.29722	1.53561	1.79938	2.08999	2.4087	2.75647	3.1338	3.54052	3.97548	4.43613	4.91788	5.41313	5.90982	6.38887	6.81974	7.15151	7.29212	7.95747	8.67749	9.45569	10.2956	11.2009	12.1748	13.2206	14.3413	15.5391	16.8157	18.1717	19.2562	20.3692	21.5029	22.6463	23.7848	25.8204	27.9175	30.0335	32.1006	33.7997
744	0	0	0	0	0	0	0	0	0	0	0	0	0	0	0	0	0	0	0	0	0	0	0	0	0	0	0	0	0	0	0	0	0	0	0	0	0	0	0	0	0	0	0	0	0	0	0	0	0
748	0	0	0	0	0	0	0	0	0	0	0	0	0	0	0	0	0	0	0	0	0	0	0	0	0	0	0	0	0	0	0	0	0	0	0	0	0	0	17.3478	19.0471	20.9114	22.9565	25.2	27.661	30.3605	33.3214	36.569	40.1309	43.7622
752	0	0	0	0	0	0	0	0.0571708	0.32669	3.67526	32.669	80.3273	94.8961	110.172	125.997	142.193	158.559	174.862	190.829	206.131	220.368	260.377	299.338	607.118	237.101	273.646	404.793	704.501	737.3	757.149	849.753	907.433	940.63	1021.91	1092.09	1133.86	1185.01	1279.57	1395.77	1601.08	1904.92	2196.56	2579.67	3011.67	3459.58	3656.89	3669.97	3760.86	3832.58
756	0	0	0	0	0	0.0822235	0.740011	5.18008	10.9855	33.6553	163.04	179.259	194.722	209.377	223.164	236.015	247.852	258.583	268.096	275.984	282.346	382.642	482.72	773.207	574.927	750.56	902.75	1056.79	1087.5	1118.35	1149.25	1180.11	1210.83	1241.29	1271.33	1300.79	1329.48	1357.17	1383.61	1526.87	1636.46	1741.4	1844.85	1900.58	1978	1994.2	1953.97	2081.69	2194.2
760	0	0	0.17303	1.16795	7.0077	39.4183	212.859	280.784	276.055	372.675	465.843	712.03	1076.2	1611.78	1397.37	1203.67	1031.07	878.978	746.159	1452.9	748.878	839.288	935.479	1037.55	874.368	985.255	1207.13	1272.13	1297.45	1323	1348.78	1374.79	1401.04	1427.51	1454.22	1481.16	1508.34	1535.75	1563.39	1591.26	1678.49	1753.51	1831.65	1913.03	1997.78	2281.45	2571.1	2553.56	2519.18
762	0	0	0	0	0.254049	1.11147	4.66816	19.0617	23.6477	28.3064	32.2938	38.0596	44.3224	51.1023	58.4163	66.2767	74.6897	83.6525	93.151	101.092	108.868	116.358	128.564	140.273	151.162	160.815	178.898	193.834	209.109	221.89	235.369	249.576	264.543	280.304	296.89	314.335	332.672	351.933	372.152	393.36	415.588	438.865	463.217	488.668	515.239	542.945	571.796	601.794	628.979
764	0	0	0	0	0	0.135212	1.3386	7.66651	10.0124	13.1409	35.557	43.666	52.5997	62.3586	72.9431	84.3539	96.5914	109.656	123.549	138.27	153.819	194.511	238.516	285.833	336.464	390.411	457.847	529.429	540.738	557.993	575.702	593.876	612.524	631.66	651.295	671.44	692.107	713.31	769.809	827.427	886.162	946.015	1006.99	1170.89	1338.15	1653.95	1984.61	2348.45	2982.3
768	0	0	0	0	0	0.18521	0.889006	4.1487	6.57654	10.2194	15.631	20.0263	25.3724	31.8534	39.6863	49.1277	60.48	74.0995	90.406	109.893	133.141	160.833	193.768	232.887	279.292	334.274	399.348	476.285	484.377	492.521	500.718	508.967	517.27	525.625	534.034	542.496	551.013	559.584	568.209	579.798	591.545	603.452	615.52	627.753	647.772	668.35	689.502	711.243	729.003
772	0	0	0	0	0	0	0	0	0	0	0	0	0	0	0	0	0	0	0	0	0	0	0	0	0	0	0	0	0	0	0	0	0	0	0	0	0	0	0	0	0	0	0	0	0	0	0	0	0
776	0	0	0	0	0	0	0	0	0	0.300673	0.307926	0.356256	0.407244	0.460853	0.517007	0.57558	0.636378	0.699129	0.763453	0.828838	0.894589	0.959775	1.02314	1.54321	2.3085	3.41845	4.99508	7.16068	7.56306	7.98426	8.4248	8.88516	9.36577	9.86699	10.3891	10.9323	11.4968	12.0823	12.6887	13.3525	14.0398	14.7497	15.4809	16.2318	16.6607	17.0798	17.4854	17.873	18.1233
780	0	0	0	0	0	0	0	0	0	0	0	2.81006e-06	6.09839e-06	1.31005e-05	2.7896e-05	5.894e-05	0.000123654	0.000257723	0.000533794	0.0010988	0.00224775	0.00456805	0.00921729	0.0184467	0.0365545	0.0715197	0.137449	0.256782	0.385256	0.577601	0.865335	1.29538	1.9375	2.8953	4.32236	6.44591	9.60155	14.2837	21.2187	31.4702	33.4399	23.0015	40.076	50.0616	59.4228	79.9203	96.6262	107.213	135.547
784	0	0	0	0	0	0	0	0	0	0	0	0	0	0	0	0	0	0	0	0	0	0	0	0	0	0	0	0	0	0	0	0	0	0	0	0	0	0	14.6659	15.2451	15.8186	16.3796	16.9197	17.428	17.9136	18.3363	18.671	18.8833	18.8052
788	0	0	0	0	1.91868	11.9917	71.9503	105.456	115.2	172.8	240	299.288	364.504	376.093	384.022	388.378	389.248	412.501	516.907	557.718	599.346	594.789	652.262	677.851	562.289	581.833	751.142	619.531	627.575	644.871	662.97	681.955	701.926	722.997	745.303	769.005	794.295	821.408	850.63	882.316	916.918	955.012	997.359	1044.98	1099.29	1162.32	1237.12	1328.56	1435.96
792	0	0	0	6.54762	26.1905	207.341	407.689	647.336	1421.36	2277.39	3136.89	3763.37	4436.35	4465.94	4432.63	4338.07	4184.09	4855.48	5559.03	6410.44	7292.02	5515.29	6696.97	7903.57	6485.27	7070.05	9074.58	9544.29	9726.79	9936.48	10146.7	10357	10567.3	10777	10985.7	11192.8	11397.9	11600.2	11798.9	11992.9	12461	12895.7	13333.5	13771.8	14207.5	14458.6	14667.4	14847.9	14896.5
795	0	0	0	0	0.221633	0.969646	4.07251	16.6294	21.2695	26.6208	32.6475	38.8574	45.731	53.326	61.7047	70.9338	81.0853	92.236	104.468	113.451	122.671	137.403	152.805	168.85	187.213	211.572	255.19	291.546	315.004	336.585	359.583	384.088	410.197	438.01	467.638	499.194	532.8	568.587	606.693	647.263	690.453	736.428	785.364	837.446	892.871	951.85	1014.61	1081.37	1145.2
796	0	0	0	0	0	0	0	0	0	0	0	7.65083e-07	1.66734e-06	3.59839e-06	7.70182e-06	1.63666e-05	3.45598e-05	7.25617e-05	0.000151559	0.00031503	0.000651822	0.00134272	0.00275391	0.00562355	0.0114317	0.0231278	0.0465474	0.0931332	0.10168	0.110985	0.121115	0.13214	0.144137	0.157189	0.171386	0.186826	0.203614	0.221864	0.2417	0.251422	0.26148	0.271886	0.282647	0.293775	0.305618	0.317874	0.330553	0.343668	0.354997
798	0	0	0	0	0	0	0	0	0	0	0	0.000266463	0.000439503	0.000718282	0.00116492	0.00187703	0.00300759	0.00479574	0.00761448	0.0120444	0.0189873	0.0298419	0.0467734	0.0731286	0.114073	0.17757	0.275876	0.427835	0.456049	0.486039	0.517913	0.551786	0.587779	0.626021	0.666649	0.709806	0.755647	0.804333	0.856037	0.91347	0.974626	1.03974	1.10906	1.18286	1.23623	1.29186	1.34983	1.41024	1.46398
800	0	0	0	0	0	0.277807	1.22661	5.27148	7.5025	10.5166	14.567	20.375	28.1829	38.6291	52.5467	71.0208	95.4629	127.706	170.128	210.754	254.917	316.079	382.213	453.334	529.459	610.604	743.52	885.41	905.962	927.063	948.903	971.553	995.097	1019.63	1045.26	1072.12	1100.37	1130.19	1161.82	1195.53	1231.67	1270.69	1313.16	1359.86	1411.82	1470.52	1538.13	1618.04	1705.18
804	0	0	0	0	0	0	8.93855	12.8067	17.9743	24.8329	33.8851	42.7123	53.2425	65.7668	80.6229	98.2023	118.958	143.416	172.183	205.961	244.469	406.868	675.368	745.593	821.338	1203.99	1651.61	2412.66	2874.03	3235.39	3641.56	4098.05	4611.03	4928.04	5266.04	5626.38	6010.51	6419.96	6856.35	7428.59	8067.51	8881.73	9413.36	10868.2	12358.9	14722.3	17513.2	21558.3	26703.7
807	0	0	0	0	0	0.195174	1.17104	6.83108	12.1202	20.7638	33.9607	37.9262	41.8916	45.8141	49.6799	53.4729	57.1747	60.7642	64.2166	67.5032	70.5897	76.4371	82.0886	87.4321	92.3304	96.6101	117.074	114.853	116.772	121.575	126.537	131.661	136.95	142.408	148.036	153.839	159.817	165.973	172.31	188.582	206.319	225.645	246.691	269.599	303.725	342.034	385.017	433.215	484.183
818	0	0	0	0.578384	3.45664	19.3897	173.846	305.139	300	360	600	689.766	778.769	759.644	730.006	653.864	568.834	648.996	724.385	830.942	927.749	786.157	697.512	782.583	636.306	584.778	668.765	539.047	525.435	511.675	497.781	483.77	469.658	455.459	441.189	426.864	412.499	398.11	440.141	481.238	521.338	560.38	598.302	527.226	595.827	672.936	923.791	1106.7	1240.24
826	0	0	0	0	0	0.136734	0.492243	7.75282	24.6604	65.9032	234.866	279.676	320.924	364.524	410.421	325.195	227.424	237.012	358.372	613.941	878.682	1363.62	2321.15	3143.41	1411.34	1471.27	1959.63	2523.74	2746.03	2973.63	3181.46	3442.88	3703.53	3840.42	3971.16	4090.28	3994.08	3865.31	3418.58	3984.35	4106.56	4919.39	4579.9	3892.69	5153.55	5673.26	6116.82	6616.96	7024.99
834	0	0	0	0	0	0.241134	1.16847	5.55375	8.81554	13.894	21.8165	29.0313	38.2046	49.8215	64.4806	82.9206	106.051	134.992	171.12	211.99	256.421	431.268	623.021	831.737	1057.47	716.691	908.348	1113.54	1143.72	1172.29	1201.97	1232.87	1265.13	1298.88	1334.31	1371.62	1411.05	1452.89	1497.5	1545.33	1596.93	1653.01	1714.48	1782.57	1858.96	1946.03	2047.32	2168.36	2304
840	0	0	0	0	0	0	0	0	5.71718	47.866	106.245	124.399	144.041	165.272	188.198	212.933	239.596	268.316	299.228	358.254	422.182	482.658	565.098	645.851	755.784	867.764	427.751	564.41	791.39	1041.99	1340.59	1665.54	2046.94	2498.76	3052.93	3752.3	4657.15	6685.56	9376.48	13106.5	18740.5	27072.5	37501.3	53824.1	61929.5	93823.1	118268	137196	159374
850	0	0	0	0	0	0	0	0	0	0	0	1.35546e-05	2.95049e-05	6.35945e-05	0.000135922	0.000288389	0.000607907	0.00127389	0.00265495	0.00550494	0.011358	0.0233207	0.0476487	0.0968628	0.195843	0.393605	0.785645	1.55526	1.76333	1.99871	2.2649	2.56588	2.9061	3.29056	3.72492	4.21552	4.76947	5.39481	6.10052	6.14269	6.1835	6.22289	6.26081	6.29722	6.01846	5.75039	5.49266	5.24491	4.97552
854	0	0	0	0	0	0.175011	0.945062	4.96158	8.43365	14.1083	23.3044	29.4922	36.9092	45.7725	56.3348	68.8905	83.7822	101.408	122.231	146.787	175.702	209.696	249.61	296.412	351.228	415.357	490.305	577.811	587.418	600.596	614.213	628.312	642.94	658.154	674.021	690.616	708.033	726.382	745.796	766.44	788.52	812.296	838.107	866.399	897.782	933.114	973.658	1021.37	1072.78
858	0	0	0	0	0	0	0.241524	0.939259	1.11086	1.26846	1.38256	1.69102	2.0439	2.44608	2.90271	3.41921	4.00112	4.65406	5.38344	6.19426	7.09061	8.07515	9.14814	10.3061	11.54	12.8315	14.1484	15.4351	16.355	17.3245	18.3457	19.4211	20.5531	21.7442	22.997	24.3141	25.6981	27.1519	28.6782	30.2798	40.988	54.7782	73.1805	131.876	190.681	258.143	381.777	509.164	576.256
860	0	0	0	0	0	1.67911	7.05227	28.7968	40.1331	54.773	73.5282	88.3398	104.956	123.562	144.362	167.579	193.456	222.261	254.285	281.93	311.041	354.418	400.672	449.827	501.902	561.375	670.798	787.692	850.11	909.403	972.667	1040.16	1112.16	1188.96	1270.86	1358.21	1451.35	1550.65	1656.52	1769.38	1889.68	2017.89	2154.53	2300.14	2455.3	2620.61	2796.72	2984.33	3164.28
862	0	0	0	0	0	2.44826	9.79305	38.0841	44.9721	51.2219	55.5569	64.31	73.5564	83.2927	93.5087	104.187	115.297	126.799	138.634	143.186	147.065	160.21	172.82	184.58	195.096	203.856	200.146	242.145	246.426	250.686	254.92	259.122	263.285	267.404	271.471	275.477	279.414	283.273	287.044	352.328	432.227	529.945	649.369	795.205	892.046	999.966	1130.9	1151	1151.22
876	0	0	0	0	0	0	0	0	0	0	0	0	0	0	0	0	0	0	0	0	0	0	0.0833541	0.131049	0.205588	0.321888	0.503065	0.784906	0.837181	0.892783	0.951916	1.0148	1.08166	1.15275	1.22833	1.30866	1.39405	1.4848	1.58123	1.68838	1.80255	1.9242	2.05379	2.19184	2.29219	2.39686	2.50601	2.61984	2.66786
882	0	0	0	0	0	0	0	0	0	0	0	0.00274601	0.00456345	0.00751484	0.0122813	0.0199421	0.0322033	0.0517552	0.0828302	0.132075	0.209905	0.332619	0.525682	0.828815	1.3039	2.04724	3.20847	5.01992	5.35573	5.71301	6.0931	6.4974	6.92743	7.38476	7.87108	8.38817	8.93794	9.52239	10.1437	10.834	11.5698	12.354	13.1896	14.0801	16.0175	18.2194	20.7217	23.5649	17.4727
887	0	0	0	0	0	0	0	0	0	0	0	0	0	0	0	0	0	0	0	0	0	0	0	0	0	0	0	0	0	0	0	0	0	0	0	0	0	0	1097.25	1103.49	1105.76	1117.68	1128.03	1136.54	1142.9	1167.31	1187.46	1202.64	1204.38
891	0	0	0	0	0	0.433251	3.11941	21.8358	46.5732	96.016	189.455	207.22	225.788	243.61	260.642	276.832	292.124	306.455	319.75	359.225	399.227	448.888	1336.67	547.96	431.144	557.515	680.788	674.808	707.578	740.635	773.962	807.538	841.342	875.355	909.554	943.918	978.422	1013.04	1047.76	1082.54	1117.37	1152.21	1448.52	1746.94	2047.22	2349.14	2652.44	2956.87	3241.76
894	0	0	0	0	0	0.0936202	0.505549	2.65413	4.74645	8.31585	14.3351	18.3689	23.2762	29.2263	36.4188	45.0895	55.5168	68.0285	83.0108	103.816	126.519	160.496	197.416	237.303	280.177	326.06	369.86	416.265	427.756	441.787	456.58	472.22	488.803	506.444	525.278	545.466	567.203	590.727	616.33	644.379	675.341	709.819	748.615	792.816	843.944	904.211	976.988	1067.73	1178.59
	0	0	0.498768	135.72	391.868	1298.88	4223.04	8515.68	14588.2	26382.2	49769.6	55211.2	60197.2	61364.7	65301.3	68423.3	72998.2	77397.4	82405.4	93349.7	100648	126438	150935	161767	150912	181417	198101	222781	234985	247801	260031	272322	288000	301602	316050	332271	349625	369282	393387	418424	447978	486925	526135	569790	604767	673405	740274	805900	895921
[truncated: 108 more columns]

## Sheet: upper
ISO1	y-10000	y-9000	y-8000	y-7000	y-6000	y-5000	y-4000	y-3000	y-2000	y-1000	y0	y100	y200	y300	y400	y500	y600	y700	y800	y900	y1000	y1100	y1200	y1300	y1400	y1500	y1600	y1700	y1710	y1720	y1730	y1740	y1750	y1760	y1770	y1780	y1790	y1800	y1810	y1820	y1830	y1840	y1850	y1860	y1870	y1880	y1890	y1900	y1910
4	0	0	0	4.28188	5.85176	23.9875	289.928	1505.93	1993.99	2365.3	4209.93	4600.06	4960.53	4810.46	4660.93	4511.93	4363.43	4088.91	3823.66	3606.8	3396.08	3445.29	3479.93	2333.27	2389.79	2431.35	2891.43	2742.8	2779.3	2810.73	2842.25	2873.84	2905.49	2937.2	2968.94	3000.72	3032.51	3064.31	3096.1	3127.87	3191.88	3327.37	3468.19	3614.54	3766.6	3982.96	4258.66	4552.85	4894.79
8	0	0	0	0	0	0	0	0	0	266.212	382.125	369.702	357.247	344.752	332.205	319.594	306.901	294.108	281.188	267.842	254.324	240.582	226.544	212.113	197.148	181.435	164.629	219.173	223.153	226.794	230.094	233.046	235.646	237.887	239.763	241.264	242.383	243.108	243.428	243.327	240.664	247.893	254.984	272.331	287.802	305.91	321.59	339.993	357.185
12	0	0	0	0	91.1151	449.581	2217.93	2748.72	2591.37	3407.18	4198.99	3951.65	3715.69	3490.7	3276.27	3072	2877.51	2692.43	2516.42	2608.77	2683.37	2485.98	2298.38	1931.23	1593.8	1535.92	2171.95	1589.55	1641.03	1690.94	1739.29	1786.09	1831.36	1875.12	1917.36	1958.12	1997.39	2035.2	2071.55	2106.46	2440.15	2764.67	3080.09	3386.49	3683.95	3972.55	4252.36	4523.47	4813.55
16	0	0	0	0	0	0	0	0	0	0	0	0	0.00735149	0.0106276	0.0153406	0.0221066	0.0317969	0.0456378	0.0653444	0.0932976	0.132769	0.188193	0.265467	0.372197	0.517714	0.712363	0.964804	1.27373	1.31352	1.35382	1.39452	1.43553	1.47673	1.51797	1.5591	1.59991	1.64019	1.67965	1.71799	1.75971	1.79968	1.83736	1.87207	1.90299	2.05599	2.21393	2.37434	2.53339	2.70075
20	0	0	0	0	0	0	0	0	0	1.32802	2.33559	2.30266	2.26735	2.22951	2.18895	2.14549	2.0989	2.0489	1.99516	1.93728	1.87475	1.80693	1.73295	1.65163	1.5613	1.45937	1.34165	1.20032	1.23715	1.27435	1.31182	1.34946	1.38713	1.42468	1.46193	1.49867	1.53465	1.56958	1.6031	1.6348	1.66419	1.69065	1.71346	1.73168	1.74417	1.74944	1.74553	1.72975	1.70807
24	0	0	0	0	0	0.595115	2.9359	14.4811	24.2222	40.473	67.5605	88.7027	116.426	152.767	200.388	262.765	344.441	451.344	591.208	754.763	911.886	1043.91	1170.14	1290.57	1475.42	1651.52	1717.77	1779.54	838.557	843.512	848.954	854.939	861.532	868.81	876.861	885.793	895.735	906.843	919.31	933.376	949.346	967.613	988.692	1013.28	1042.35	1077.28	1120.17	1174.35	1252.72
28	0	0	0	0	0	0	0	0	0	1.01473	2.00302	2.14912	2.30528	2.47214	2.65036	2.84065	3.04375	3.26046	3.49159	3.73803	4.0007	4.28056	4.57866	4.89608	5.23398	5.59359	5.97624	6.38331	7.03386	7.75024	8.53906	9.40759	10.3638	11.4165	12.5752	13.8507	15.2544	16.7993	18.4992	20.3698	22.4278	23.2497	22.518	20.0916	17.8317	16.097	15.3574	13.6904	12.1125
31	0	0	0	0	0	4.7611	16.4417	56.7682	68.2745	81.6729	97.2823	102.818	108.633	114.739	121.147	127.867	134.91	142.287	150.008	155.939	161.567	238.169	311.938	382.841	300.564	368.514	433.523	495.559	320.374	344.37	370.139	397.81	427.52	459.417	493.659	530.414	569.864	612.203	657.638	706.39	758.697	814.811	875.005	939.568	1008.81	1083.06	1162.67	1248.03	1347.26
32	0	0	0	0	0	21.1634	23.8642	26.9048	30.3272	37.4657	42.2149	47.4347	53.2844	59.8374	67.1753	75.3885	84.5774	94.8531	106.339	119.17	133.498	149.486	167.319	187.196	209.338	233.985	261.402	291.878	330.906	375.128	425.232	481.996	546.301	619.141	701.643	795.082	900.899	1020.72	1156.4	1324.1	1499.86	1698.82	1925.07	2180.08	2487.1	2816.08	3188.3	3609.4	8055.18
36	0	0	0	0	0	0	0	0	0	0	0	0	0	0	0	0	0	0	0	0	0	0	0	0	0	0	0	0	0	0	0	0	0	0	0	0	8.29884	16.596	22.9209	30.0344	45.1438	83.3295	215.385	518.091	944.151	1959.26	2302.41	3652.6	5747.76
40	0	0	0	0	0	0.833333	6.16667	36.5	108	177.5	875	946.324	1014.71	913.971	816.176	721.324	629.412	694.853	757.353	891.176	1019.12	1283.82	1746.32	2735.29	1672.78	2617.34	2682.88	2604.27	2707.5	2803.77	2891.77	2969.9	3036.26	3075.46	3090.4	3087.74	3049.12	2934.14	2778.06	2734.73	2789.79	2719.19	2665.24	2633.41	2611.38	2633.7	2637.87	2664.54	2684.62
44	0	0	0	0	0	0	0	0	0	0	0	0.0403723	0.0432897	0.0464038	0.0497263	0.0532695	0.0570459	0.0610687	0.0653514	0.0699081	0.0747532	0.0799015	0.0853681	0.0911682	0.0973174	0.103831	0.110725	0.118014	0.128547	0.140012	0.152488	0.166066	0.18084	0.196914	0.214403	0.233428	0.254122	0.27663	0.30111	0.308417	0.315878	0.435247	0.529549	0.628079	0.808436	1.02545	1.28561	1.5965	1.97824
48	0	0	0	0	0	0	0	0	0	0	0	0	0	0	0	0	0	0	0	0	0	0	0	0	0	0	0	0	0	0	0	0	0	0	0	0	0	0	1.40372	1.44176	1.47974	1.5175	1.55488	1.59165	1.62967	1.66664	1.70222	1.73601	1.77771
50	0	0	0	0	0	21.1507	104.344	514.668	846.029	1390.46	2284.8	2411.58	2532.71	2680.09	2820.71	2954.54	3081.6	3350.12	3606.21	3963.95	4304.75	4382.12	4452.71	4358.96	4830.48	5025.74	6384.55	7646.98	7778.06	7860.58	7940.03	8015.38	8085.31	8148.2	8202.09	8244.6	8272.96	8284.02	8274.36	8354.12	8406.27	8426.99	8413.63	8365.39	8355.99	8264.93	8381.79	8415.49	8416.58
51	0	0	0	0	1.87248	6.46746	22.3343	77.1137	82.3752	86.1077	86.5308	89.6093	92.6848	95.7382	98.7473	101.685	104.521	107.215	109.722	110.55	110.704	157.096	197.259	231.427	171.714	198.036	215.214	226.058	233.415	240.9	248.504	256.215	264.019	271.898	279.833	287.799	295.77	303.712	311.589	319.354	326.956	334.333	341.412	348.106	354.311	359.9	364.719	368.578	373.38
52	0	0	0	0	0	0	0	0	0	0	0	0.00233049	0.00245737	0.00258809	0.00272221	0.00285921	0.00299836	0.00313876	0.00327926	0.00341839	0.00355428	0.00368456	0.013956	0.0526379	0.1975	0.736139	2.7199	9.9281	9.77349	9.61893	9.4644	9.30988	9.15534	9.00078	8.84615	8.69144	8.53662	8.38165	9.46047	10.4925	11.4774	12.4152	13.3056	13.776	14.2141	14.6195	14.9921	15.3314	15.5597
56	0	0	0	0	0	0.792433	7.81867	46.2781	84.6918	189.5	488.752	490.754	492.146	492.864	492.832	473.402	272.326	347.378	355.199	394.354	427.453	605.68	853.997	1108.01	657.07	940.736	1017.53	1041.68	1116.68	1187.42	1253.85	1315.9	1373.49	1426.52	1474.9	1518.51	1557.19	1590.8	1619.12	1641.93	1724.2	1678.81	1732.37	1783.89	1816.8	1914.62	2035.2	2031.52	2032.38
60	0	0	0	0	0	0	0	0	0	0	0	0.062733	0.0661231	0.0696106	0.0731832	0.0768249	0.080515	0.0842268	0.0879268	0.091572	0.095108	0.0984651	0.101553	0.104255	0.106412	0.107807	0.108129	0.106902	0.116827	0.127637	0.139406	0.152211	0.166137	0.181274	0.197717	0.215569	0.234936	0.255933	0.278678	0.303297	0.32992	0.358682	0.389719	0.423173	0.459183	0.497887	0.539418	0.583898	0.635079
64	0	0	0	0	0	0	0	0	0	0	0	1.04239	1.39715	1.87207	2.50764	3.35789	4.49493	6.01488	8.04588	7.17241	6.39125	5.69285	5.06861	4.9619	4.81507	5.35142	6.3408	7.03981	8.02354	8.53091	9.07387	9.65494	10.2768	10.9423	11.6546	12.4169	13.2329	14.1062	15.0411	17.4537	19.1892	22.6469	23.9693	24.9006	26.5049	29.4745	30.2821	33.2351	40.2056
68	0	0	0	0	0	55.3609	182.076	598.718	609.897	608.471	584.808	602.826	620.689	638.285	655.483	672.131	688.049	703.024	716.807	752.498	781.252	815.189	840.276	856.024	861.736	856.384	698.656	631.532	632.767	633.808	634.646	635.27	635.668	635.828	635.736	635.378	634.74	633.803	632.552	735.122	853.837	845.401	836.366	974.946	817.804	667.188	1059.87	901.455	1015
70	0	0	0	0	0	7.41665	34.867	163.886	238.676	340.466	468.003	459.346	450.74	441.748	432.35	422.521	412.233	401.45	390.134	378.234	365.69	366.832	365.498	361.52	354.659	344.57	387.013	350.481	365.323	373.839	382.436	391.105	399.834	408.613	417.428	426.265	435.107	443.936	452.731	470.245	488.177	506.504	525.198	544.225	588.781	636.496	687.503	741.918	804.451
72	0	0	0	0	0	0	0	0	0	0	0	0	0	0	0	0	0	0	0	0	0	0	0	0	0	0	0	0	0	0	0	0	0	0	0	0	0	0	105.98	107.687	109.623	111.835	114.385	117.358	120.871	125.093	130.276	136.827	146.28
76	0	0	0	0	0	0	15.6496	30.8762	60.9065	120.121	236.859	248.861	261.396	274.478	288.126	302.353	317.176	332.61	348.668	347.961	347.087	376.746	404.893	431.528	456.651	515.207	133.663	170.706	183.925	198.307	213.825	230.768	249.471	269.911	292.517	317.665	345.831	377.615	463.411	564.124	710.044	854.243	996.863	1138.07	1278.29	1408.89	1733.75	2080.91	2613.08
84	0	0	0	0	0	0	0.707099	2.61579	2.99867	3.36737	3.64471	3.84617	4.05419	4.26822	4.48751	4.7111	4.93772	5.16575	5.39315	5.61732	5.83495	6.0418	6.23242	6.39966	6.53396	6.62221	6.6456	6.57551	6.99828	7.44611	7.92026	8.42198	8.95257	9.51333	10.1056	10.7307	11.3899	12.0845	12.8158	12.9742	13.128	13.2765	13.419	13.5546	14.8963	16.3592	17.9517	19.6827	21.6849
86	0	0	0	0	0	0	0	0	0	0	0	0	0	0	0	0	0	0	0	0	0	0	0	0	0	0	0	0	0	0	0	0	0	0	0	0	0	0	0	0	0	0	0	0	0	0	0	0	0
90	0	0	0	0	0	0	0	0	0	0	0	0.00933808	0.0135311	0.0195825	0.0283011	0.0408396	0.0588339	0.0845968	0.121382	0.173738	0.247977	0.352769	0.499863	0.704872	0.987944	1.37379	1.88986	2.55927	3.14495	3.86344	4.74449	5.82444	7.14758	8.76791	10.7512	13.1773	16.1435	19.7678	24.1932	24.9894	25.7966	26.6127	27.4357	28.263	28.5109	28.7353	28.9334	29.1015	29.4043
92	0	0	0	0	0	0	0	0	0	0	0	1.38227e-05	2.72555e-05	5.37245e-05	0.000105863	0.000208526	0.000410601	0.000808198	0.00159018	0.00312753	0.00614858	0.0120826	0.0237329	0.0465951	0.0914361	0.179339	0.351565	0.688804	0.739498	0.793871	0.852185	0.914722	0.98178	1.05368	1.13077	1.21341	1.30199	1.39693	1.49869	1.53547	1.57302	1.61137	1.65051	1.69047	1.73317	1.7768	1.82137	1.86689	1.92441
96	0	0	0	0	0	0	0	0	0	0	0	0.208479	0.27943	0.374414	0.501528	0.671579	0.898986	1.20298	1.60918	1.43448	1.27825	1.36628	2.02744	1.98476	1.92603	1.42704	1.5852	1.68955	1.82944	2.08338	2.37348	2.70496	3.08382	3.5169	4.01206	4.5783	5.22594	5.96679	6.81441	7.65774	8.15331	9.31859	9.55127	9.60905	9.39319	9.59291	9.47456	9.95562	11.4893
100	0	0	0	0	0	7.58951	41.1858	223.461	376.699	623.073	997.214	1255.6	1495.24	1309.7	1133.58	966.843	809.466	778.158	746.777	929.872	1093.82	1134.08	1152.47	1174.11	609.376	832.329	1213.72	1123.66	1145.69	1183.44	1222.22	1262.05	1302.93	1344.87	1387.89	1431.99	1477.18	1523.46	1570.84	1619.36	1643.74	1701.72	1761.3	1761.54	1760.81	2016.38	2271.73	2126.23	2454.13
104	0	0	0	0	0	2.68898	8.84376	29.0808	31.3615	343.976	657.33	710.858	762.176	811.286	858.188	902.883	945.371	985.651	1023.73	1059.59	1093.25	1338.94	1573.57	1489.08	1733.37	1965.52	2161.5	2346.44	2374.22	2401.25	2427.53	2453.06	2477.84	2501.86	2525.14	2547.66	2569.44	2590.46	2739.13	2884.79	3027.45	3167.11	3303.76	3642.02	3973.52	4298.13	5226.82	6231.1	7569.88
108	0	0	0	0	0	0.210404	0.830395	3.2767	4.13509	5.18704	6.45511	9.17615	13.0389	18.5201	26.294	37.3143	52.9287	75.041	106.338	129.429	151.151	178.87	204.838	229.074	251.599	272.433	290.539	307.062	309.269	310.13	311.131	312.29	313.623	315.151	316.902	318.903	321.191	323.81	326.813	330.266	334.253	338.883	344.296	350.681	358.301	367.529	378.924	393.369	414.743
112	0	0	0	0	0	34.5922	119.458	412.454	440.779	461.07	463.973	504.614	541.393	574.296	603.299	580.031	556.675	577.629	594.479	607.119	615.406	874.086	1236.14	1159.21	1079.66	1328.64	1513.45	1803.62	2092.27	2224.42	2363.93	2511.07	2666.11	2829.28	3000.83	3180.93	3369.75	3567.39	3773.88	3989.19	4213.15	4445.49	4685.78	4933.37	5187.36	5446.55	5709.32	5973.53	6272.38
116	0	0	0	0	0	5.54641	24.1907	105.899	145.868	198.942	266.476	278.749	291.381	304.356	317.656	331.256	345.127	359.232	373.526	380.466	385.997	408.696	428.543	445.536	459.669	470.929	498.761	521.784	522.312	522.723	523.018	523.197	523.261	523.211	523.048	522.771	522.382	521.882	521.27	520.548	524.179	530.248	536.328	542.417	548.513	577.836	637.988	703.286	778.589
120	0	0	0	0	0	4.46534	19.8261	88.0119	135.071	206.5	314.7	354.626	399.49	449.883	506.463	569.96	641.187	721.047	810.542	910.781	1022.99	1148.54	1288.92	1445.78	1620.95	1816.43	2034.42	2277.33	2242.31	2246.31	2251.12	2256.82	2263.52	2271.34	2280.42	2290.93	2303.07	2317.09	2333.29	2352.04	2373.8	2399.18	2428.94	2464.13	2506.17	2557.1	2619.91	2699.31	2819.38
124	0	0	0	0	0	0	0	0	0	0	0	0	0	0	0	0	0	0	0	0	0	0	0	0	0	0	0	25.629	32.9244	42.3373	54.4932	70.2054	90.5319	116.85	150.955	257.718	345.588	499.532	677.001	921.721	1260.74	1734.98	2395.78	3859.3	5300.77	6514.46	8093.82	8809.59	15153.4
132	0	0	0	0	0	0	0	0	0	0	0	0	0	0	0	0	0	0	0	0	0	0	0	0	0	0	2.92606	5.55792	5.88254	6.30245	6.7517	7.23229	7.74635	8.29612	8.88402	9.51263	10.1847	10.903	11.6708	12.4912	13.3679	14.3045	15.3049	16.3734	17.5143	18.7325	20.0329	21.4209	23.0342
136	0	0	0	0	0	0.000241558	0.00143002	0.00846419	0.0154899	0.0277267	0.861277	0.907818	0.955674	1.00467	1.05457	1.10508	1.1558	1.20626	1.25583	1.30372	1.34888	1.39001	1.42533	1.45248	1.46814	1.46745	1.4428	1.38089	1.46305	1.54919	1.63937	1.7336	1.83189	1.93419	2.04039	2.15034	2.26376	2.38032	2.49953	2.50293	2.50202	2.49614	2.48453	2.46622	2.44276	2.40983	2.36542	2.30678	2.24284
140	0	0	0	0	0	3.5313	15.679	69.602	107.07	164.004	250.331	259.856	269.658	279.738	290.096	300.733	311.646	322.835	334.296	346.026	358.018	370.266	382.762	395.495	408.454	421.625	434.991	448.535	446.551	449.623	452.977	456.646	460.668	465.087	469.955	475.336	481.305	487.954	495.395	503.771	513.261	524.096	536.582	551.131	568.317	588.967	614.329	646.397	692.581
144	0	0	0	0	0	7.73892	28.634	105.926	121.832	137.545	150.4	169.998	188.047	204.547	219.498	232.9	244.748	255.033	263.746	270.868	276.377	296.726	313.796	288.799	261.743	264.86	309.844	345.513	342.752	331.48	320.527	309.885	299.546	289.502	279.744	270.266	261.06	252.118	243.434	235	257.825	354.365	487.74	624.69	693.877	685.423	734.403	861.591	948.955
148	0	0	0	0	0	7.1635	28.2719	111.56	152.039	206.453	279.489	314.929	354.75	399.477	449.692	506.043	569.252	640.118	719.531	746.714	772.46	815.724	856.837	920.637	1006.33	1054.99	1206.16	1350.11	1383.13	1383.27	1383.79	1384.74	1386.18	1388.15	1390.73	1394	1398.04	1402.99	1408.98	1416.18	1424.81	1435.16	1447.58	1462.56	1480.75	1503.1	1530.96	1566.5	1622.56
152	0	0	0	0	0	13.1243	40.9747	128.533	125.829	226.383	393.06	407.936	422.915	437.927	452.89	467.702	482.246	496.379	509.932	522.195	531.034	555.269	573.826	586.451	592.782	592.301	547.72	502.301	507.594	512.822	517.976	523.049	528.032	532.915	537.688	542.341	546.862	551.24	555.461	602.25	652.732	707.161	857.405	1056.02	1218.95	1388.36	1539.72	1690.65	1918.49
156	0	0	0	59.3319	238.56	878.811	2487.43	5466.29	10782.8	21266.1	41933.2	37295.1	31400.7	15971.5	21934.3	27288.8	36835.9	30611.2	24062.2	29153.3	27308.2	66665.2	76194.8	59395.5	53147.9	67875.2	72535.8	74105.8	76791.4	79775	80781	80930.3	81696.4	81948.9	82383.3	83922.8	85848	87573.3	90684.1	92771	93316.2	93037.6	92742.9	92257.9	91298.4	90902.1	92547.3	94225.7	97016.1
158	0	0	0	0	0	1.84402	7.27773	28.7175	35.0399	41.8214	47.9416	46.3238	44.7048	43.0833	41.4579	39.8267	38.1876	36.5379	34.8743	33.1925	31.4869	35.7004	39.162	41.8252	43.621	44.4427	40.1033	176.292	196.445	202.438	208.487	214.577	220.689	226.8	232.886	238.916	244.853	250.658	256.279	261.658	260.456	260.449	259.894	258.321	255.747	252.586	248.125	269.083	290.843
162	0	0	0	0	0	0	0	0	0	0	0	0	0	0	0	0	0	0	0	0	0	0	0	0	0	0	0	0	0	0	0	0	0	0	0	0	0	0	0	0	0	0	0	0	0	0	0	0	0
166	0	0	0	0	0	0	0	0	0	0	0	0	0	0	0	0	0	0	0	0	0	0	0	0	0	0	0	0	0	0	0	0	0	0	0	0	0	0	0	0	0	0	0	0	0	0	0	0	0
170	0	0	0	0	0	122.53	453.362	1677.13	1919.64	2150.15	2315.47	2385.3	2454.26	2521.86	2587.54	2650.62	2710.33	2765.74	2815.71	2950.68	3056.97	3278.03	3450.77	3572.21	3637.95	7852.94	5821.32	4353.35	4699.6	5049.94	5404.1	5761.84	6122.91	6487.06	6854.05	7223.62	7595.52	7969.5	6822.9	5770.16	6108.63	6442.14	6682.5	6504.97	6236.38	6627.03	6735.98	6810.3	6948.11
174	0	0	0	0	0	0	0	0	0	0	0	0	0	0	0	0	0	0	0	3.14487	6.15299	7.22002	8.23315	9.19266	10.0988	10.9519	13.3548	15.625	15.419	16.3837	17.4076	18.4943	19.6475	20.8711	22.1694	23.5467	25.0078	26.5575	28.2012	29.9442	31.7925	33.7522	35.8298	38.0321	40.3664	42.8403	45.4618	48.2394	51.4774
175	0	0	0	0	0	0	0	0	0	0	0	0	0	0	0	0	0	0	0	0	0	0	0	0	0	0	0	0	0	0	0	0	0	0	0	0	0	0	0	0	0	0	0	0	0	0	0	0	0
178	0	0	0	0	0	0.890844	3.51587	13.8734	18.3421	24.2436	32.0347	36.0143	40.4763	45.4774	51.0803	57.3549	64.3785	72.2369	81.025	90.848	101.822	114.074	127.747	142.995	159.989	178.916	199.98	223.407	222.744	223.003	223.338	223.756	224.267	224.883	225.617	226.484	227.504	228.698	230.096	231.73	233.645	235.895	238.553	241.713	245.509	250.127	255.842	263.088	274.161
180	0	0	0	0	0	7.53571	28.7307	109.632	138.349	174.695	220.719	282.505	361.958	464.202	595.858	765.482	984.133	1266.11	1629.88	1796.29	1954.47	2231.99	2495.83	2746.03	3131.75	3497.06	3628.57	3750.01	3749.01	3742.4	3736.61	3731.71	3727.81	3725.04	3723.52	3723.43	3724.95	3728.32	3733.83	3741.83	3752.76	3767.19	3785.83	3809.65	3839.96	3878.62	3928.33	3993.28	4103.94
184	0	0	0	0	0	0	0	0	0	0	0	0.00494645	0.00725583	0.0106393	0.0155945	0.0228481	0.0334616	0.0489836	0.0716733	0.104824	0.153231	0.223879	0.326926	0.477139	0.695968	1.01455	1.47803	2.15183	2.24547	2.34302	2.44465	2.55051	2.66077	2.7756	2.89517	3.01968	3.14931	3.28425	3.42471	3.58082	3.74375	3.91377	4.09117	4.27626	4.38011	4.4861	4.59424	4.70456	4.84488
188	0	0	0	0	0	5.00593	22.2263	98.6669	135.577	182.354	235.974	248.874	262.167	275.812	289.752	303.916	318.211	332.517	346.685	360.523	373.786	386.157	397.225	406.444	413.068	416.044	6.74341	17.1477	18.217	19.3454	20.5353	21.7888	23.1081	24.4952	25.9518	27.4795	29.0795	30.7525	33.5629	36.5804	42.1376	49.1306	55.9226	62.4047	76.7031	95.3634	112.644	139.848	168.459
191	0	0	0	0	0	6.46193	33.8406	177.188	287.01	454.895	693.009	679.646	666.321	652.384	637.798	622.519	606.495	589.664	571.953	553.269	533.497	533.437	529.376	520.961	507.68	488.753	541.708	480.305	481.517	491.264	500.955	510.563	520.054	529.392	538.537	547.443	556.057	564.32	572.165	590.533	608.786	626.791	644.39	661.39	707.9	756.018	805.328	855.22	910.037
192	0	0	0	0	0	0	0	0	0	0	0	1.4988	1.8219	2.2132	2.68668	3.25908	3.95037	4.78439	5.78946	6.99919	8.45336	10.1989	12.2909	14.7939	17.7831	21.3455	25.5814	30.605	35.2056	40.4947	46.5747	53.5631	61.5951	70.8255	81.4323	93.6194	107.621	123.705	142.181	163.401	202.722	250.557	309.649	324.824	339.578	359.122	380.261	402.601	526.109
196	0	0	0	1.40804	6.94879	34.2868	169.148	209.628	197.628	259.845	320.231	313.922	307.213	300.1	292.577	284.64	276.284	267.508	258.309	210.347	167.246	154.577	161.264	173.852	118.87	143.645	77.5847	63.5146	62.4143	61.3236	60.2424	59.1707	58.1086	57.056	56.013	54.9796	53.9557	52.9413	55.7137	58.3509	60.855	63.228	65.4721	71.3947	77.0394	82.4104	87.5121	92.349	104.779
203	0	0	0	0	0	6.9587	41.1955	243.833	446.845	801.701	1384.43	1339.95	1295.38	1250.69	1205.84	1160.79	1115.49	1069.87	1023.85	1098.4	1160.41	1319.41	1659.95	2337.4	1816.65	2015.81	2762.97	2480.33	2503.89	2524.92	2543.42	2559.36	2572.71	2583.45	2591.52	2596.91	2599.55	2599.41	2596.42	2590.51	2962.68	3313.13	3387.32	3546.52	3719.35	3864.86	3963.1	4140.39	4373.17
204	0	0	0	0	0	3.20086	15.7909	77.8875	126.639	205.79	334.21	375.086	420.837	472.023	529.267	593.258	664.758	744.613	833.754	933.21	1044.12	1167.72	1305.39	1458.65	1603.68	1740.51	1755.89	1645.18	1506.28	1379.03	1262.44	1155.63	1057.78	968.156	886.059	810.866	742	678.932	621.177	577.172	536.242	498.174	462.772	429.849	434.542	439.249	443.967	448.696	456.051
208	0	0	0	0	0	0	0	0	0	1.50801	109.727	356.015	379.628	401.708	422.243	441.225	458.648	474.512	488.823	498.406	512.831	581.001	645.952	701.292	452.574	656.609	740.343	817.084	825.202	833.948	843.195	853.011	863.472	888.229	898.844	909.108	919.021	928.586	990.668	1051.35	1147.13	1210.46	1323.5	1482.04	1632.72	1780.82	1942.41	2145.45	2407.44
212	0	0	0	0	0	0	0	0	0	0	0	0.111297	0.13428	0.161791	0.194647	0.233789	0.280281	0.335317	0.400202	0.476326	0.565095	0.667821	0.78551	0.918497	1.06581	1.22396	1.38463	1.52941	1.74904	1.99919	2.28389	2.6076	2.97533	3.39263	3.86561	4.40102	5.00623	5.6892	6.45852	7.32326	8.29287	9.37697	10.3572	11.9436	12.5725	12.3946	8.43584	11.3067	12.8794
214	0	0	0	0	0	0	0.721747	2.66998	3.14983	3.6903	4.28324	5.22926	6.3815	7.78417	9.4908	11.5661	14.0881	17.1513	20.8693	25.379	30.8453	37.466	45.479	55.169	66.8769	81.0104	38.4246	38.7267	39.978	41.267	42.5945	43.9617	45.3696	46.8191	48.3114	49.8475	51.4285	53.0556	54.7299	58.0653	61.5991	65.3425	69.3075	73.5068	95.4934	124.045	161.953	210.077	263.969
218	0	0	0	0	0	37.0551	121.87	400.744	409.218	409.883	396.966	404.408	411.568	418.392	424.817	430.774	436.184	440.958	444.992	496.978	542.48	568.464	588.991	603.867	612.823	615.479	477.566	440.156	433.952	427.757	421.569	415.389	409.217	403.051	396.892	390.739	384.592	378.449	372.312	366.179	449.832	505.29	567.418	624.647	679.453	761.81	822.321	887.312	1010.72
222	0	0	0	0	0	4.56744	15.0218	49.396	50.2346	49.9789	47.7725	50.3616	53.0253	55.7542	58.5358	61.354	64.1882	67.0119	69.7917	72.4848	75.0362	77.3748	79.4069	81.0064	81.9985	82.1297	81.0078	77.9619	77.2558	76.7428	76.4958	76.6166	77.2478	78.591	80.931	92.7752	103.894	114.272	123.892	132.73	149.157	164.217	177.853	201.094	221.926	255.019	284.071	308.749	375.979
226	0	0	0	0	0	2.02815	7.50415	27.7603	32.1674	36.7405	41.0109	44.2793	47.7738	51.5047	55.4821	59.715	64.2119	68.9794	74.0226	80.3358	86.0049	82.7555	79.5124	114.41	127.813	139.596	141.428	142.427	141.6	140.765	139.959	139.185	138.449	137.754	137.107	136.515	135.987	135.535	135.174	134.923	134.81	134.871	135.162	135.766	136.821	138.575	141.544	147.095	162.267
231	0	0	0	0	0	8.95928	37.1273	153.827	211.817	291.605	401.358	482.362	579.545	696.097	835.827	1003.28	1203.87	1444.07	1731.56	1697.45	1663.36	1629.29	1595.24	1561.21	1527.19	1493.2	1459.22	1425.26	1444.64	1463.52	1481.9	1499.79	1517.17	1534.06	1550.45	1566.34	1581.74	1596.63	1611.03	1624.93	2255.26	2874.04	3481.27	4076.95	4661.08	5233.67	5794.72	6344.22	6921.88
232	0	0	0	0	0	0.884746	3.27356	12.11	14.6554	17.713	21.378	22.5866	23.8562	25.1892	26.5879	28.0549	29.5923	31.2026	32.8881	33.9636	34.9628	39.3038	43.4131	50.0097	56.2476	62.129	68.1608	73.8148	74.5107	75.3877	76.3371	77.3676	78.4894	79.7143	81.0567	82.5336	84.1659	85.9788	88.0042	90.2817	92.8624	95.8128	99.2217	103.21	107.95	113.692	120.821	129.966	143.064
233	0	0	0	0	0	0	0	1.12051	4.42065	17.437	68.7657	142.337	144.653	146.814	148.79	150.551	152.058	153.27	154.136	154.596	154.577	153.991	152.725	150.632	147.517	143.099	136.955	128.38	146.973	168.187	192.375	219.934	251.311	287.004	327.572	373.634	425.878	485.061	552.018	614.845	684.149	760.436	844.207	935.937	942.801	948.06	951.436	952.593	956.608
234	0	0	0	0	0	0	0	0	0	0	0	0.0575815	0.0567339	0.0558259	0.0548535	0.0538125	0.0526975	0.0515028	0.050221	0.0488435	0.0473596	0.0457558	0.0440143	0.0421116	0.040015	0.0376764	0.0350211	0.0319215	0.0391714	0.0480486	0.0589124	0.0721997	0.0884414	0.108281	0.132499	0.162038	0.198036	0.241868	0.295182	0.359958	0.438563	0.533818	0.649071	0.788274	0.956066	1.15785	1.39984	1.68912	2.04532
238	0	0	0	0	0	0	0	0	0	0	0	0	0	0	0	0	0	0	0	0	0	0	0	0	0	0	0	0	0	0	0	0	0	0	0	0	0	0	0	0	0	0	0	0	0	0	0	0	0
242	0	0	0	0	0	0	0	0	0	4.98986	5.44689	5.862	6.30246	6.76874	7.26104	7.77925	8.32283	8.89074	9.48123	10.0917	10.7183	11.3559	11.9974	12.633	13.2497	13.8293	14.3471	14.7677	15.3311	15.9133	16.5148	17.1359	17.7772	18.4389	19.1216	19.8255	20.5511	21.2987	22.0686	22.9245	23.808	24.7195	25.6594	26.6279	27.0738	27.5194	28.3576	29.1497	37.8961
246	0	0	0	0	0	0	0	0	1.47011	4.05913	22.8683	33.726	43.3058	52.0461	59.9385	66.9713	73.1287	78.3894	82.7245	97.052	109.082	118.498	125.873	131.307	110.572	102.047	187.594	343.384	369.946	398.518	429.248	462.295	497.828	536.028	577.089	621.221	668.643	719.595	825.822	944.741	1150.01	1272.24	1495.19	1636.35	1818.01	1890.27	2077.96	2255.77	2474.64
250	0	0	0	0	260.424	334.225	637.039	1208.36	2839.63	5281.02	11987.2	13425.8	14753.4	12684.6	10711.1	9867.64	9054.69	9240.68	9390.11	10402.9	11307.1	12930.2	16750.3	24344.2	15912.5	20460.1	23604.2	26001.6	26297.4	26571.5	26823.5	27053	27259.7	27443	27602.5	27737.5	27847.4	27931.3	29118.9	30036.3	30510.8	31034.8	31479.2	30717.1	29866.4	29469.2	28634.6	27325.6	26320
254	0	0	0	0	0	0	0	0	0	0	0	0.841408	0.885752	0.931148	0.977382	1.02417	1.07116	1.1179	1.16381	1.20814	1.24995	1.28799	1.32064	1.34568	1.36004	1.35918	1.33602	1.27812	1.39056	1.512	1.64298	1.78408	1.93584	2.09879	2.27343	2.46017	2.65935	2.87117	3.09565	3.33254	3.58127	3.84079	4.10941	4.38457	4.66247	4.93761	5.20195	5.44365	5.67745
258	0	0	0	0	0	0	0	0	0	0	0	0.0296018	0.0428649	0.0619878	0.0895104	0.129043	0.185697	0.266678	0.382079	0.545945	0.777636	1.10351	1.55883	2.18957	3.05313	4.21566	5.73976	7.64579	7.89457	8.1477	8.40487	8.66564	8.92954	9.19599	9.46431	9.73369	10.0032	10.2718	10.5381	10.8306	11.1191	11.4015	11.6751	11.9369	11.94	11.9191	11.8702	11.7887	11.736
262	0	0	0	0	0	0	0	0	0	0	0	0	0	0	0	0	0	0	0	0	0	0	0	0	0	0	0	0	0	0	0	0	0	0	0	0	0	0	3.62991	3.57509	3.51935	3.46258	3.40461	3.34526	3.2843	3.22145	3.15641	3.0888	3.03575
266	0	0	0	0	0	0	0.981722	4.35805	6.1738	8.68771	12.1157	13.5259	15.0939	16.8362	18.7713	20.9188	23.3008	25.9407	28.8645	32.1003	35.6783	39.6314	43.995	48.8073	54.109	59.9438	66.358	73.4007	74.2286	74.24	74.2762	74.3398	74.434	74.5624	74.7293	74.9397	75.1998	75.5168	75.8997	76.3597	76.9107	77.5706	78.3625	79.3176	80.4786	81.9058	83.6889	85.9678	89.4912
268	0	0	0	0	12.2244	42.2226	145.809	503.434	537.43	561.165	562.678	582.493	602.25	621.82	641.05	659.757	677.721	694.68	710.312	714.051	713.365	1010.78	1266.8	1480.5	1096.44	1256.87	1358.15	1391.03	867.063	919.275	974.015	1031.31	1091.16	1153.55	1218.43	1285.71	1355.25	1426.84	1500.2	1574.94	1650.56	1726.38	1801.51	1874.8	1944.68	2009.11	2065.27	2109.25	2147.74
270	0	0	0	0	0	0	0	0	0	0	0	0.358087	0.401057	0.449036	0.502584	0.562319	0.628925	0.703154	0.785836	0.877883	0.980298	1.09418	1.22074	1.36128	1.51726	1.69023	1.88191	2.09414	1.87506	1.67878	1.50295	1.34545	1.20437	1.078	0.964829	0.863475	0.772711	0.691436	0.618663	0.919535	1.36662	2.03092	3.01788	4.48411	6.66213	9.8972	14.7019	21.8372	32.6195
275	0	0	0	5.02491	19.8386	78.3103	309.065	306.423	231.106	243.089	239.665	230.463	221.098	211.574	193.307	176.077	159.842	144.559	130.189	116.691	104.028	92.1648	81.0656	70.6969	61.0263	52.0226	43.6555	35.8961	38.9209	42.1862	45.7095	49.5092	53.6048	58.0169	62.7673	67.8788	73.3754	79.2823	82.5677	85.9488	89.4246	92.9939	96.6546	100.405	98.2738	96.1313	93.9773	91.8122	90.1536
276	0	0	0	0	0	8.16813	24.099	66.7316	197.065	582.125	4237.52	3761.71	3318.37	2715.06	2220.62	1684.06	1269.2	1245.48	2443.51	4792.13	5871.55	9204.69	14649.2	17650.2	9175.03	11612.6	12383.6	11090.7	10887.2	10685.6	10485.8	10287.8	13550.8	13462.7	13374.2	13285.3	13195.9	13913.8	13818	13721.9	13625.2	13528.2	15970.6	15837.9	15705	15571.8	15438.4	16938.5	16854.8
288	0	0	0	0	0	3.12367	13.8691	61.5675	90.8695	134.089	197.822	222.229	249.574	280.199	314.483	352.848	395.759	443.734	497.344	557.22	624.06	698.632	781.783	874.443	977.632	1092.47	1220.18	1362.1	1362.07	1362.4	1363.15	1364.34	1366.04	1368.31	1371.21	1374.84	1379.28	1384.66	1391.14	1398.88	1408.13	1419.18	1432.4	1448.31	1467.6	1491.26	1520.74	1558.3	1617
292	0	0	0	0	0	0	0	0	0	0	0	0	0	0	0	0	0	0	0	0	0	0	0	0	0	0	0	0	0	0	0	0	0	0	0	0	0	0	0	0	0	0	0	0	0	0	0	0	0
296	0	0	0	0	0	0	0	0	0	0	0	0	0	0	0	0	0	0	0	0	0	0	8.26329	9.01268	9.82526	10.7057	11.6589	12.69	13.2545	13.8432	14.4571	15.0973	15.7646	16.4604	17.1856	17.9415	18.7293	19.5502	20.4055	21.3557	22.3485	23.3855	24.4687	25.5999	26.2465	26.9072	27.582	28.2713	29.1422
300	0	0	0	0	10.9637	20.8067	41.0585	81.0072	239.693	787.879	1553.56	1527.45	1501.34	1290.83	1086.84	818.232	558.761	582.586	605.106	626.321	646.23	683.829	725.54	758.831	534.609	580.954	851.849	832.266	862.852	892.837	922.222	951.006	979.189	1006.77	1033.75	1060.13	1085.91	1111.09	1135.67	1159.65	1259.75	1368.23	1486.27	1614.04	1753.11	1923.06	2108.82	2312.63	2470.04
304	0	0	0	0	0	0	0	0	0	0	0	0	0	0	0	0	0	0	0	0	0	0	0	0	0	0	0	0	0	0	0	0	0	0	0	0	0	0	0	0	0	0	0	0	0	0	0	0	0
308	0	0	0	0	0	0	0	0	0	1.55801	2.78641	2.95434	3.13019	3.31402	3.50588	3.70571	3.91343	4.12882	4.35159	4.58131	4.8174	5.05909	5.30541	5.55512	5.80667	6.05813	6.30711	6.55062	7.01189	7.50499	8.03205	8.59535	9.19732	9.84053	10.5277	11.2618	12.0459	12.8834	13.7776	14.0702	14.3675	14.6695	14.9762	15.2876	15.6211	15.9601	16.3045	16.6543	17.1078
312	0	0	0	0	0	0	0	1.23431	2.273	4.11042	7.20609	7.61855	8.04702	8.49097	8.9496	9.42179	9.90603	10.4004	10.9023	11.4085	11.915	12.4166	12.9068	13.3774	13.8179	14.2146	14.55	14.8	15.805	16.8757	18.0164	19.2313	20.525	21.9023	23.3681	24.928	26.5874	28.3523	30.229	30.7754	31.3258	31.8797	32.4369	32.9969	33.5967	34.1998	34.8057	35.414	36.232
316	0	0	0	0	0	0	0	0	0	0	0	0.263259	0.318026	0.383723	0.462381	0.556355	0.668355	0.801463	0.959146	1.14523	1.36381	1.61915	1.91531	2.25573	2.64226	3.07361	3.5425	4.03021	4.17487	4.32359	4.4764	4.63328	4.79424	4.95925	5.12827	5.30125	5.47809	5.6587	5.84294	6.0474	6.25624	6.46924	6.68614	6.90662	6.98796	7.06594	7.14009	7.2099	7.31677
320	0	0	0	0	0	27.523	90.52	297.656	303	301.939	289.53	305.375	321.706	338.473	355.609	373.026	390.611	408.221	425.673	608.761	771.56	779.565	781.252	776.158	763.615	742.625	508.297	531.097	514.58	498.389	482.515	466.95	451.686	436.712	422.022	407.605	393.453	379.556	365.905	352.489	388.191	425.724	466.446	515.203	560.33	590.774	602.67	613.8	660.848
324	0	0	0	0	0	1.40622	6.24364	27.7167	39.6476	56.489	80.087	89.5829	100.169	111.965	125.103	139.728	155.999	174.091	194.197	216.526	241.309	268.797	299.264	333.008	370.353	411.648	457.273	507.636	507.339	507.179	507.171	507.331	507.677	508.231	509.021	510.076	511.434	513.138	515.243	517.817	520.942	524.728	529.313	534.884	541.695	550.109	560.658	574.172	595.456
328	0	0	0	0	0	0	0.313154	1.85353	3.4127	6.16963	10.8104	13.0949	15.847	19.158	23.1352	27.9045	33.6129	40.4309	48.5548	58.2083	69.6433	73.162	76.0284	84.2437	91.1232	96.6197	90.5989	93.5579	96.7293	99.9937	103.353	106.808	110.362	114.016	117.77	121.628	125.591	129.659	133.834	138.778	143.877	149.132	154.548	160.125	170.705	181.943	193.874	206.537	221.24
332	0	0	0	0	0	0	0	0	0	0	0	1.27549	1.84695	2.67088	3.8567	5.55994	8.00081	11.4896	16.4612	23.5204	33.501	47.5379	67.1492	94.313	131.498	181.546	32.7431	36.3357	44.5507	54.5978	66.878	81.8774	100.185	122.512	149.717	182.836	223.112	272.035	331.384	403.279	443.23	461.257	479.356	516.69	550.211	565.707	614.258	665.088	741.907
334	0	0	0	0	0	0	0	0	0	0	0	0	0	0	0	0	0	0	0	0	0	0	0	0	0	0	0	0	0	0	0	0	0	0	0	0	0	0	0	0	0	0	0	0	0	0	0	0	0
336	0	0	0	0	0	0	0	0	0	0	0	0	0	0	0	0	0	0	0	0	0	0	0	0	0	0	0	0	0	0	0	0	0	0	0	0	0	0	0	0	0	0	0	0	0	0	0	0	0
340	0	0	0	0	0	7.27241	23.9181	78.6498	80.7162	81.4923	80.081	97.1381	117.731	142.563	172.47	208.438	251.631	303.414	365.381	439.383	527.552	632.324	756.45	902.99	1075.27	1276.82	345.405	93.0742	95.1564	97.2747	99.4293	101.62	103.848	106.111	108.412	110.749	113.122	115.532	117.978	120.459	226.434	260.669	300.037	329.522	350.013	371.722	394.718	419.07	447.421
0	0	0	0	0	0	0	0	0	0	0	0	0	0	0	0	0	0	0	0	0	0	0	0	0	0	0	0	0	0	0	0	0	0	0	0	0	0	0	0	0	0	0	0	0	0	0	0	0	0
348	0	0	0	0	0	17.6599	69.6979	275.024	505.489	683.467	595.651	576.765	557.906	539.065	520.232	417.83	321.695	386.379	444.713	567.587	677.595	774.546	980.766	1450.14	1093.08	1280.57	1192.09	1319.82	1441.45	1559.07	1672.66	1782.26	1887.85	1989.44	2087.05	2180.68	2270.33	2356	2437.7	2515.43	2794.39	3062.32	3199.85	3289.88	3410.73	3595.8	3806.98	4127.8	4435.6
352	0	0	0	0	0	0	0	0	0	1.42428	2.45032	2.41615	2.3795	2.34023	2.29816	2.25308	2.20477	2.15295	2.09728	4.99153	9.4728	12.5349	11.7912	11.0253	8.76769	8.04844	6.06243	5.29746	5.29714	5.29401	5.28787	5.27852	5.2657	5.24917	5.22864	5.20378	5.17423	5.13959	5.0994	5.15839	5.21064	5.25493	5.28982	5.31358	5.16275	5.00129	4.82743	4.63887	4.45801
356	0	0	0	2773.42	4904.61	8671.98	15330.5	27096.4	47883.7	84601.9	149447	140256	131294	122613	114254	106246	98607.5	91351	84481.7	77999.9	71901.6	66179.4	60823.3	55821.4	51160.1	46824.9	42800.4	46462.8	49560.3	52860.8	56377.5	60124.1	64115.3	68366.6	72894.8	77717.2	82852.6	88320.9	94142.8	100341	106939	113961	121435	122064	122687	123365	124017	124634	125940
360	0	0	0	0.174895	0.21578	5.90907	8.06114	10.9998	88.0745	179.246	286.489	340.356	401.616	471.132	549.854	638.826	739.195	852.221	979.28	1121.88	1281.66	1550.33	1855.78	2202.07	3052.51	3820.35	4237.14	4745.4	4854.07	4964.37	5076.3	5189.86	5305.06	5636.63	5974.91	6319.96	6671.81	7030.51	7009.2	6967.76	6908.47	6833.38	6744.42	8115.21	9309.56	10342.6	11228.5	13290.5	15399.7
364	0	0	7.75278	31.9951	258.823	1445.76	7489.04	7955.4	5850	5680	8400	8421.38	8422.92	8405.37	8369.48	8315.99	8245.65	7185.35	6194.11	6208.37	6202.55	6243.27	6259.45	4168.14	4242.73	4293.53	5084.3	4809.13	4956.03	5003.42	5050.87	5098.38	5145.92	5193.48	5241.06	5288.63	5336.19	5383.7	5431.17	5478.57	5717.53	5949.27	6173.84	6391.31	6601.73	7516.57	8406.25	9042.27	9715.2
368	0	0	4.95101	16.3061	53.7181	289.152	2567.67	3182.16	3150	3550	2100	2115.12	2123.57	2033.19	1944.7	1773.65	1612.19	2689.58	3658.35	3130.87	2642.75	2192.7	1631.15	1121.33	1058.08	996.561	1170.95	878.674	868.166	857.713	847.315	836.972	826.684	816.45	806.272	796.149	786.081	776.068	806.295	837.62	870.076	903.701	938.531	974.603	1098.7	1238.46	1395.85	1573.07	1782.82
372	0	0	0	0	0	2.22112	13.149	77.8279	142.163	253.668	433.223	426.679	419.656	412.121	404.035	395.356	386.028	375.99	365.163	365.623	363.587	455.695	638.476	788.595	541.632	650.205	889.364	1471.92	1745.69	1749.11	1749.21	1745.44	1737.15	1677.96	1614.58	1729.98	1962.16	1992.92	2131.61	2298.95	2243.81	2426.58	1631.15	1453.7	1420.01	1171.45	1043.7	971.197	941.4
376	0	0	0	0	29.5488	131.22	582.616	649.841	551.377	652.463	723.683	1021.35	1438.12	2019.84	1414.54	987.63	687.259	476.464	328.952	276.277	228.895	214.238	198.889	182.917	117.453	128.044	109.969	74.0752	78.7657	83.1621	87.2695	91.0929	94.6375	97.9085	100.911	103.649	106.13	108.357	109.683	112.071	114.457	116.836	119.205	121.557	120.249	118.887	117.47	115.999	115.132
380	0	0	0	18.1282	39.1404	69.0096	170.495	423.618	1744.78	4307.52	20792.9	18531.9	16445.4	14522.3	12752.3	8076.01	3839.89	5449.01	6870.77	7307.08	7979.03	9421.03	11632.1	16143.9	9746.52	10338.4	14368.5	13745.6	13549.9	13404.3	13259.4	13115.1	12971.6	12828.8	12686.6	12545.1	12404.2	12264.1	12124.6	11985.8	12211.6	12440.9	12673.8	12909.5	12625.1	12795.9	13074.1	13279.3	13638.5
384	0	0	0	0	0	3.53542	14.6508	60.7018	86.2168	122.164	172.738	194.547	219.043	246.545	277.408	312.029	350.846	394.35	443.08	497.636	558.683	626.954	703.259	788.49	883.63	989.757	1108.06	1239.82	1238.53	1237.52	1236.8	1236.41	1236.4	1236.8	1237.67	1239.07	1241.07	1243.76	1247.25	1251.68	1257.2	1264.04	1272.46	1282.83	1295.65	1311.63	1331.79	1357.74	1400.17
388	0	0	0	0	0	0	0	0	0	0	0	0.00862216	0.016705	0.032334	0.0625201	0.120751	0.232935	0.448745	0.863238	1.65791	3.17843	6.08122	11.6086	22.1025	41.9556	79.3587	37.3669	17.5027	20.1653	23.23	26.757	30.8155	35.4847	40.8558	47.0331	54.1366	62.3037	71.6919	82.482	83.5245	84.5662	85.6066	86.6449	87.6802	97.8942	109.278	121.961	0	24.63
392	0	0	0	0	0	0	8.21348	36.4612	50.1415	67.5323	87.6221	141.244	191.032	289.647	380.576	549.228	703.37	972.794	1166.32	1425.88	1397.65	1415.06	1120.27	1201.61	1430.94	1755.35	2226.61	3160.73	3375.4	3317.74	3260.01	3202.2	3144.29	3064.99	2986.36	2908.38	2831.04	2754.33	2774.55	2791.27	2804.44	2813.99	2819.86	2854.09	2882.89	3011.4	3193.23	3470.72	3816.07
398	0	0	0	0	0	0	1.29459	1.59636	1.96812	2.42598	2.98977	3.6744	4.51448	5.54496	6.80853	8.35731	10.255	12.5791	15.4244	18.9061	23.1646	28.3708	34.7323	42.5014	51.9842	63.5522	77.655	94.8373	117.598	145.812	180.784	224.127	277.844	344.41	426.895	529.097	655.719	812.582	1006.9	1247.58	1545.67	1914.84	2371.99	2938.03	3638.84	4506.44	5580.4	6909.7	8604.22
400	0	0	0	7.75818	29.3164	110.863	419.557	399.257	289.304	292.651	277.758	377.299	511.604	692.396	500.197	360.549	259.263	185.941	132.973	113.424	95.6483	90.8986	85.9336	80.7742	53.2983	60.6597	54.345	38.2735	38.4827	37.8616	37.2441	36.6303	36.0202	35.4139	34.8113	34.2126	33.6177	33.0267	32.4397	31.8565	32.8577	33.8831	34.9329	36.0073	37.1063	45.398	55.5295	67.9056	83.4984
404	0	0	0	0	0	3.16403	11.7966	44.0722	54.8197	68.3266	85.3334	104.839	128.766	158.105	194.069	238.136	292.11	358.193	439.066	502.129	562.309	647.148	727.956	804.738	877.497	946.238	1078.77	1204.13	1223.04	1226.94	1231.37	1236.41	1242.12	1248.59	1255.9	1264.18	1273.56	1284.21	1296.33	1310.18	1326.09	1344.45	1365.82	1390.91	1420.73	1456.69	1500.92	1556.76	1639.3
408	0	0	0	0	0	6.6543	24.6209	91.0807	104.264	116.809	125.845	155.625	192.221	237.109	292.056	359.158	440.885	540.113	660.154	707.658	746.901	848.262	1065.67	748.92	812.934	856.254	973.272	1083.62	1168.03	1206.01	1244.65	1283.92	1323.74	1364.04	1404.73	1445.72	1486.87	1528.06	1569.11	1609.83	1595.08	1559.25	1522.4	1484.43	1445.21	1403.86	1368.59	1331.12	1298.6
410	0	0	0	0	0	6.64908	24.6016	91.0092	104.096	116.459	125.119	166.169	220.409	291.953	386.132	509.828	671.873	883.524	1158.99	1240.81	1307.6	1482.26	1857.77	1301.61	1407.1	1473.55	1660.33	1821.3	1961.22	2056.55	2155.15	2256.95	2361.81	2469.55	2579.94	2692.66	2807.31	2923.37	3040.17	3156.91	3090.73	2990.44	2886.8	2803.92	2714.32	2601.93	2481.85	2352.34	2257.29
414	0	0	0	0	0	0	0	0	0	0	0	0	0	0	0	0	0	0	0	0	0	0	0	0	0	0	0	0	0	0	0	0	0	0	0	0	0	0	70.0656	68.5576	66.9625	65.2701	63.4677	61.5394	59.4652	57.2186	54.7638	52.0506	49.2878
417	0	0	0	0	5.65055	19.5167	67.3977	232.704	250.938	266.313	275.322	286.336	297.551	308.94	320.471	332.106	343.799	355.497	367.138	368.77	369.219	382.646	393.671	402.27	408.407	412.034	446.574	474.753	495.723	517.197	539.546	562.8	586.993	612.158	638.33	665.544	693.838	723.248	753.813	785.572	818.566	852.835	888.422	925.369	963.72	1003.52	1044.81	1087.65	1138.6
418	0	0	0	0	0	0	6.11095	22.6064	20.9241	22.2712	26.2903	27.7559	29.3019	30.9313	32.6472	34.4526	36.3507	38.3446	40.4374	46.5494	52.3847	57.9445	63.2296	68.2407	72.9782	77.4427	94.6093	110.902	111.847	112.762	113.647	114.503	115.33	116.126	116.894	117.631	118.339	119.018	131.465	143.675	155.648	167.385	178.884	190.147	201.173	211.792	235.605	260.412	265.042
422	0	0	0	0	8.27134	34.2825	142.067	588.617	754.058	944.873	1137	1251.17	1375.08	1509.18	1294.31	1108.16	946.989	807.522	686.905	615.245	547.072	545.715	540.168	530.026	392.544	385.43	405.798	305.025	283.47	272.004	260.839	249.962	239.364	229.032	218.955	209.121	199.517	190.13	180.946	171.95	181.025	187.317	193.392	199.133	204.394	232.854	223.368	234.513	222.985
426	0	0	0	0	0	0	0	0	0	0	0	0	0	0	0	0	0	0	0	0	0	0	0	0	0	0	0	0	0	0	0	0	0	0	0	0	0	0	59.0715	61.6242	64.5434	67.9177	71.8672	76.5605	82.2412	89.277	98.2521	110.16	127.582
428	0	0	0	0	0	0	0	1.53082	6.0394	23.8221	93.9462	194.457	197.55	200.419	203.024	205.319	207.252	208.76	209.771	210.197	209.933	208.845	206.766	203.474	198.666	191.902	182.493	169.235	193.456	221.024	252.374	287.991	328.413	374.235	426.112	484.76	550.955	625.53	709.37	787.001	871.842	964.215	1064.33	1172.22	1251.89	1332.79	1413.52	1492.01	1574.31
430	0	0	0	0	0	2.03046	9.01522	40.0203	59.6684	88.9301	132.493	137.223	142.08	147.063	152.174	157.411	162.773	168.259	173.866	179.593	185.434	191.388	197.448	203.609	209.865	216.209	222.632	229.123	229.371	229.69	230.09	230.578	231.166	231.864	232.687	233.652	234.779	236.091	237.619	239.399	241.476	243.91	246.778	250.18	254.259	259.213	265.337	273.093	284.892
434	0	0	0	0	34.2981	152.311	676.259	754.29	640	757.333	840	939.402	1037.17	927.151	818.22	852.594	886.001	918.394	949.728	960.355	970.218	672.064	379.83	563.199	741.893	915.677	903.597	891.126	823.178	822.864	822.456	821.956	821.363	820.677	819.897	819.023	818.055	816.992	815.835	876.492	877.244	877.858	878.334	878.671	878.87	878.928	922.861	1043.92	1082.49
438	0	0	0	0	0	0.826522	2.79601	9.45676	9.89244	10.1238	9.95453	9.81602	9.66748	9.50831	9.33778	9.15509	8.9593	8.74929	8.52373	8.28096	8.01895	7.73509	7.42595	7.08685	6.71119	6.28903	5.80437	5.22842	5.25574	5.28046	5.30235	5.32116	5.33661	5.34839	5.35616	5.35954	5.35811	5.35138	5.33883	5.31982	5.29365	5.25949	5.21636	5.16311	5.09833	5.0203	4.92686	4.81524	4.70876
440	0	0	0	0	0	0	0.462781	1.82611	7.20438	28.4173	112.068	231.968	236.006	239.827	243.394	246.659	249.572	252.074	254.096	255.558	256.365	256.404	255.534	253.58	250.317	245.445	238.543	228.986	262.968	301.917	346.546	397.665	456.195	523.187	599.831	687.483	787.677	902.154	1032.88	1157.97	1297.67	1453.58	1627.48	1821.27	1980.5	2152.43	2337.9	2537.71	2768.57
442	0	0	0	0	0	1.86985	8.30214	36.8548	50.5963	67.9518	87.671	86.4474	85.1351	83.7288	82.2221	80.6079	78.8778	77.0218	75.028	72.8819	70.5651	68.0544	65.319	62.3172	58.9896	55.2466	50.9436	45.8183	47.462	49.1385	50.8449	52.5781	54.3343	56.1086	57.8954	59.6879	61.4782	63.2566	65.0116	70.3779	76.0771	82.1028	88.4393	95.0573	92.3265	94.2413	95.4852	95.9847	96.1912
446	0	0	0	0	0	0	0	0	0	0	0	0	0	0	0	0	0	0	0	0	0	0	0	0	0	0	0	0	0	0	0	0	0	0	0	0	0	0	0	0	0	0	0	0	0	0	0	0	0
450	0	0	0	0	0	0	0	0	0	0	0	0.584381	1.1468	2.24981	4.41229	8.65041	16.9535	33.2143	65.0474	95.5055	124.595	172.631	218.4	261.914	303.183	388.463	460.249	528.033	533.649	536.806	540.281	544.112	548.339	553.013	558.193	563.948	570.363	577.54	585.605	594.717	605.074	616.936	630.64	646.645	665.588	688.385	716.414	751.877	803.164
454	0	0	0	0	0	0.783326	2.90733	10.7907	13.0482	15.7518	18.979	22.7435	27.2461	32.6295	39.0633	46.7494	55.9276	66.8827	79.9525	91.8994	103.23	121.006	137.842	153.742	168.714	182.766	193.231	202.928	204.433	206.592	208.934	211.481	214.256	217.291	220.621	224.288	228.343	232.85	237.887	243.552	249.971	257.307	265.778	275.682	287.435	301.648	319.255	341.772	374.021
458	0	0	0	0	0	0	0.570545	2.11063	2.57438	3.1592	3.88876	5.73482	8.45482	12.4612	18.3604	27.0437	39.8202	58.6127	86.2429	89.2652	92.1015	107.927	123.023	137.389	151.026	163.934	200.311	234.847	241.047	247.117	253.057	258.867	264.546	270.095	275.513	280.802	285.959	290.987	302.88	314.519	325.905	337.039	347.919	448.182	546.548	643.003	975.719	1075.4	1368.88
462	0	0	0	0	0	0	0	0	0	0	0	0.00789959	0.011435	0.0165299	0.0238588	0.034379	0.0494443	0.0709596	0.101588	0.145025	0.206345	0.292421	0.41238	0.577974	0.803565	1.10494	1.49495	1.97006	1.96526	1.95936	1.95227	1.94392	1.93421	1.92305	1.91031	1.89589	1.87963	1.86137	1.84093	1.87898	1.91468	1.94741	1.97639	2.00069	2.13132	2.26211	2.38995	2.51029	2.63147
466	0	0	0	0	0	2.55783	11.3568	50.4149	71.9481	102.211	144.368	161.416	180.411	201.564	225.109	251.302	280.424	312.785	348.721	358.919	368.211	385.575	401.58	423.558	457.673	481.736	545.895	605.578	610.97	612.405	614.1	616.084	618.39	621.058	624.133	627.672	631.738	636.413	641.793	648.001	655.189	663.554	673.352	684.928	698.758	715.518	736.218	762.448	801.502
470	0	0	0	0	0	0	0	0	0	0	0	0.66123	0.800644	0.96851	1.17035	1.41265	1.70303	2.05035	2.46486	2.95837	3.54426	3.39007	3.23513	6.15829	2.92173	5.52477	10.4017	17.0444	17.312	17.5679	17.8122	18.045	18.2663	18.9269	19.564	20.1778	20.7684	21.3359	22.3011	23.2316	24.1274	30.3118	29.5553	29.8936	29.8697	29.4934	28.7743	27.7222	28.1256
474	0	0	0	0	0	0	0	0	0	0	0	0.00255195	0.00492704	0.00949995	0.0182902	0.0351566	0.0674535	0.129155	0.246716	0.470016	0.892597	1.68875	3.18046	5.95583	11.0715	20.3787	9.246	4.1034	4.69559	5.37076	6.13999	7.01569	8.01179	9.14378	10.4289	11.8863	13.537	15.4041	17.5128	17.6365	17.7414	17.8249	17.8838	17.9147	18.5533	19.1748	19.7693	20.3238	20.9418
478	0	0	0	0	0	1.08583	4.28541	16.91	21.3842	26.8964	33.5928	37.5366	41.9272	46.8125	52.2454	58.2837	64.9909	72.4365	80.6962	82.9892	85.0668	89.0011	92.6121	100.137	106.131	110.774	125.395	138.951	139.235	138.931	138.66	138.423	138.225	138.071	137.966	137.915	137.927	138.011	138.176	138.438	138.813	139.321	139.993	140.863	141.983	143.424	145.29	147.743	151.923
480	0	0	0	0	0	0	0	0	0	0	0	0.0611872	0.0789069	0.101644	0.130774	0.168028	0.215578	0.276135	0.353065	0.450508	0.573518	0.728178	0.921688	1.16235	1.45939	1.82231	2.25959	2.7758	3.41977	4.21232	5.18751	6.38715	7.86254	9.6766	11.9065	14.6467	18.0133	22.1479	27.2244	33.4552	41.1003	41.9221	40.7886	50.3722	50.9366	56.5844	57.4075	56.5556	55.6274
484	0	0	0	0	0	52.4388	167.157	448.201	2764.18	3482.82	4478.53	4739.49	5014.19	5303.22	5607.16	5926.6	6262.13	6614.35	6983.85	8051.05	9115.86	10328.8	11536.2	12736.3	13927.3	15107.3	602.744	2403.54	2637.05	2875.72	3119.6	3368.72	3623.13	3882.87	4147.98	4418.49	4694.43	4975.84	5262.74	5555.17	5853.13	6156.66	6465.76	6780.45	7100.74	7424.34	9039.14	10791.5	12384.1
492	0	0	0	0	0	0	0	0	0	0	0	0	0	0	0	0	0	0	0	0	0	0	0	0	0	0	0	0	0	0	0	0	0	0	0	0	0	0	0	0	0	0	0	0	0	0	0	0	0
496	0	0	0	0	0	0	0	0	367.743	481.657	632.616	634.501	636.209	637.732	639.062	640.193	641.117	641.825	642.311	650.716	657.829	829.605	990.098	1019.64	697.292	675.215	653.506	632.162	617.457	608.442	599.518	590.686	581.944	573.292	564.728	556.253	547.864	539.562	531.346	523.214	518.068	516.975	515.842	514.67	513.457	517.2	558.023	602.014	653.161
498	0	0	0	0	0	18.8738	65.1774	225.038	240.449	251.442	252.874	261.903	270.928	279.897	288.743	297.392	305.752	313.714	321.146	327.886	332.255	471.733	666.805	624.922	581.565	714.874	812.952	966.209	625.218	664.451	705.83	749.429	795.317	843.558	894.206	947.304	1002.88	1060.94	1121.47	1184.43	1249.74	1317.27	1386.84	1458.18	1530.96	1604.7	1678.8	1752.46	1835.14
500	0	0	0	0	0	0	0	0	0	0	0	3.90634e-05	7.64088e-05	0.000149401	0.000292006	0.000570498	0.00111413	0.00217483	0.00424346	0.00827583	0.0161321	0.0314305	0.0612043	0.119117	0.231696	0.450406	0.875021	1.69883	1.82219	1.95438	2.09601	2.24775	2.41031	2.58445	2.77096	2.97072	3.18464	3.41371	3.65898	3.74528	3.83332	3.92311	4.01467	4.10802	4.20786	4.30975	4.41372	4.51979	4.65467
504	0	0	0	0	85.7996	381.018	1691.72	1886.92	1601.01	1894.53	2101.33	2151.16	2200.02	2247.68	2293.9	2338.42	2380.95	2421.21	2458.88	2539.7	2602.05	2338.97	2093.14	2203.91	1857.41	1453.67	2043.32	1485.69	1532.76	1578.29	1622.29	1664.78	1705.78	1745.29	1783.33	1819.92	1855.06	1888.78	1921.09	1952.01	2270.54	2579.8	2879.87	3170.85	3452.82	3725.87	3990.09	4245.57	4518.31
508	0	0	0	0	0	1.02399	4.24341	17.5815	23.5121	31.3305	41.5649	45.7803	50.4058	55.4788	61.0397	67.1322	73.8035	81.1044	89.0895	124.989	159.038	227.438	292.182	353.303	410.836	464.817	565.002	658.905	674.914	690.557	705.833	720.744	735.29	749.472	763.289	776.743	789.835	802.563	814.93	826.936	839.073	923.473	1016.28	1118.32	1176.67	1237.95	1302.31	1369.89	1449.16
512	0	0	0	0	0	0	0	0	0	0	0	0	0	0	0	0	0	0	0	0	0	0	0	0	0	0	0	0	0	0	0	0	0	0	0	0	0	0	166.465	163.316	162.313	161.247	159.806	157.93	155.545	152.333	151.968	150.563	148.632
516	0	0	0	0	0	0	0	0	0	0	0	0	0	0	0	0	0	0	0	0	0	0	0	0	0	0	0	0	0	0	0	0	0	0	0	0	0	0	301.194	312.855	325.001	337.651	350.827	364.552	378.851	393.746	409.264	425.432	444.828
520	0	0	0	0	0	0	0	0	0	0	0	0	0	0	0	0	0	0	0	0	0	0	0	0	0	0	0	0	0	0	0	0	0	0	0	0	0	0	0	0	0	0	0	0	0	0	0	0	0
524	0	0	0	0	0	55.8017	206.466	763.786	856.05	959.273	1074.73	1001.83	933.61	869.768	810.039	754.166	701.911	653.048	607.366	560.767	516.924	491.133	464.609	437.802	411.078	384.731	427.369	455.503	486.94	520.461	556.201	594.306	634.926	678.224	724.373	773.554	825.963	881.804	941.297	1024.28	1070.68	1210.96	1228.27	1220.58	1214	1278.9	1241.61	1247.91	1447.92
528	0	0	0	0	0	0	5.33617	10.5281	20.7678	40.9587	80.7637	75.6251	70.7927	66.2491	61.9776	57.9628	54.1897	50.6446	84.1545	107.279	115.67	136	149.846	259.53	181.392	268.243	351.011	429.697	433.222	436.634	439.934	443.122	446.197	449.16	452.011	454.75	457.376	459.89	462.292	464.581	507.543	552.425	590.334	630.265	672.825	733.802	797.55	878.952	891.329
530	0	0	0	0	0	0	0	0	0	0	0	6.95843e-05	0.000134305	0.000258866	0.000498198	0.000957191	0.00183559	0.00351258	0.00670528	0.0127638	0.0242158	0.0457602	0.086052	0.160831	0.298195	0.546853	0.986895	1.55849	1.65172	1.74953	1.85201	1.95922	2.07116	2.18782	2.30911	2.43489	2.56492	2.69886	2.83625	2.84265	2.84452	2.84122	2.83194	3.29157	3.40139	3.77285	3.92133	3.95327	3.98308
533	0	0	0	0	0	0	0	0	0	0	0	7.08655e-06	1.36774e-05	2.6362e-05	5.07335e-05	9.74717e-05	0.000186914	0.000357663	0.000682724	0.00129952	0.00246532	0.0046583	0.00875903	0.0163684	0.030343	0.055631	0.100356	0.176335	0.186864	0.197908	0.209477	0.221574	0.234202	0.247356	0.261025	0.275193	0.289829	0.304894	0.320331	0.320959	0.321063	0.320564	0.319372	0.350044	0.411394	0.641175	0.733295	0.892402	0.82616
540	0	0	0	0	0	0	0	1.21807	2.22919	3.99044	6.85988	7.36459	7.89653	8.45526	9.03978	9.64839	10.2785	10.9262	11.5864	12.2514	12.9114	13.5524	14.1554	14.6939	15.1297	15.4061	15.4333	15.0538	15.5184	15.9881	16.4617	16.9379	17.4151	17.8915	18.365	18.8329	19.2923	19.7398	20.1711	20.6384	21.0811	21.4916	21.8608	22.1776	21.98	21.7002	21.3209	20.8187	20.2771
548	0	0	0	0	0	0	0	0	0	0	0	0	0	0	0	0	0	0	0	0	0	0	0.117446	0.172937	0.254524	0.374412	0.55048	0.808899	0.844886	0.882416	0.921552	0.962359	1.0049	1.04926	1.09549	1.14368	1.1939	1.24623	1.30076	1.36134	1.42463	1.49074	1.55979	1.63191	1.67313	1.71525	1.75828	1.80222	1.85775
554	0	0	0	0	0	0	0	0	0	0	0	0	0	0	0	0	0	0	0	0	0	0	0	0	0	0	0	0	0	0	0	0	0	0	0	0	0	0.382995	0.751812	1.73884	4.02139	9.29946	21.5032	49.7181	127.417	228.124	408.111	700.926	920.214
558	0	0	0	0	0	16.4472	54.0929	177.873	182.108	183.166	178.775	189.067	199.769	210.869	222.351	234.19	246.351	258.792	271.455	284.266	297.132	309.938	322.536	334.739	346.311	356.952	167.873	78.5112	83.056	87.8524	92.9132	98.252	103.883	109.821	116.081	122.679	129.632	136.957	144.673	152.797	178.452	205.156	235.812	246.609	256.981	288.427	324.508	365.026	412.883
562	0	0	0	0	0	8.80678	34.7574	137.151	180.363	237.144	311.738	350.285	393.482	441.873	496.06	556.711	624.567	700.449	785.265	812.796	838.632	883.317	925.46	1006.32	1055.01	1130.88	1289.71	1440.08	1454.8	1455.2	1456.03	1457.34	1459.19	1461.65	1464.79	1468.69	1473.47	1479.26	1486.21	1494.53	1504.45	1516.29	1530.45	1547.49	1568.14	1593.46	1624.99	1665.17	1727.94
566	0	0	0	0	0	11.4101	47.2833	195.906	275.402	386.727	542.498	712.296	934.958	1226.84	1609.34	2110.38	2766.46	3625.22	4748.8	5596.39	6409.51	6738.73	7050.32	7776.22	8466.99	9122.46	11366.2	14298.7	14354.1	14346.8	14343.2	14343.8	14349	14359.3	14375.3	14398	14428.1	14466.7	14515.2	14575.3	14649	14739	14848.6	14982.4	15146.7	15350.1	15605.7	15933.4	16461
570	0	0	0	0	0	0	0	0	0	0	0	0.00237034	0.0034999	0.00516615	0.00762321	0.0112452	0.0165823	0.0244438	0.0360191	0.0530555	0.0781187	0.114974	0.169144	0.248725	0.365576	0.537062	0.788585	1.15729	1.20862	1.26214	1.31795	1.37614	1.43679	1.50002	1.56591	1.63458	1.70614	1.7807	1.85838	1.94468	2.03484	2.129	2.22734	2.33002	2.43724	2.54917	2.61279	2.67775	2.75991
574	0	0	0	0	0	0	0	0	0	0	0	0	0	0	0	0	0	0	0	0	0	0	0	0	0	0	0	0	0	0	0	0	0	0	0	0	0	0	0	0	0	0	0	0	0	0	0	0	0
578	0	0	0	0	0	0	0	0	1.47011	5.79875	114.342	247.324	259.835	270.64	279.713	287.02	292.515	296.138	297.808	297.417	294.816	365.327	420.174	448.925	202.516	362.645	402.203	423.609	430.406	437.226	444.065	450.919	457.782	464.651	471.521	478.384	485.238	492.074	498.888	534.281	593.714	653.65	726.713	804.338	864	891.595	921.314	996.142	1032.4
580	0	0	0	0	0	0	0	0	0	0	0	0.000327264	0.000476423	0.000693008	0.00100719	0.00146247	0.00212148	0.0030742	0.00444972	0.00643279	0.00928719	0.0133886	0.0192701	0.0276859	0.039698	0.0567943	0.0810463	0.115315	0.12004	0.124946	0.130041	0.13533	0.14082	0.146519	0.152432	0.158567	0.164932	0.171533	0.178379	0.185993	0.193909	0.202139	0.210692	0.219582	0.228817	0.238412	0.243418	0.248496	0.25511
583	0	0	0	0	0	0	0	0	0	0	0	0	0	0	0	0	0	0	0	0	0	0	0	0	0	0	0	0	0	0	0	0	0	0	0	0	0	0	0	0	0	0	0	0	0	0	0	0	0
584	0	0	0	0	0	0	0	0	0	0	0	0	0	0	0	0	0	0	0	0	0	0	0	0	0	0	0	0	0	0	0	0	0	0	0	0	0	0	0	0	0	0	0	0	0	0	0	0	0
585	0	0	0	0	0	0	0	0	0	0	0	0.0422969	0.0516558	0.0630593	0.0769474	0.0938525	0.114419	0.139426	0.169813	0.206717	0.251505	0.305826	0.371663	0.451398	0.547891	0.66457	0.805536	0.975693	1.01798	1.06202	1.1079	1.15568	1.20543	1.25723	1.31117	1.36732	1.42576	1.48659	1.5499	1.62026	1.69368	1.77028	1.85019	1.93354	1.98014	2.02768	2.07618	2.12565	2.18864
586	0	0	0	345.559	516.775	772.69	1155.13	1726.55	2580.15	3855.02	5758.67	5525.64	5275.62	5075.12	4855.81	4623.82	4384.24	4332.97	4240.18	4237.1	4183.08	3871.14	3575.91	3182.39	3206.04	3032.47	3503.29	3829.66	4037.12	4300.37	4582.56	4885.06	5209.34	5556.99	5929.69	6329.28	6757.71	7217.08	7709.64	8398.55	8668.32	9603.93	9542.4	9306.25	9097.18	9290.61	8765.97	8835.41	9815.97
591	0	0	0	0	0	7.55054	24.7892	81.378	82.8584	82.6914	79.6451	85.6372	91.9801	98.6764	105.724	113.115	120.833	128.854	137.14	145.636	154.268	162.932	171.488	179.746	187.443	194.212	89.7873	41.0268	42.5213	44.0598	45.6427	47.2704	48.9432	50.6611	52.4241	54.2321	56.0847	57.9815	59.9216	65.7275	72.0683	78.9889	86.5371	97.6639	108.254	116.332	132.775	151.454	190.907
598	0	0	0	3.73896	16.6068	24.5824	109.146	484.52	665.136	893.203	1152.18	1166.35	1179.24	1190.64	1200.34	1208.1	1213.62	1216.59	1216.6	1213.2	1205.83	1193.77	1176.14	1151.76	1118.99	1075.48	1017.49	938.462	922.51	906.333	889.915	873.242	856.295	839.054	821.497	803.596	785.323	766.641	747.51	727.882	707.701	686.897	665.387	643.069	618.985	593.866	567.5	539.605	512.724
600	0	0	0	0	0	2.25284	7.79948	27.1259	29.3743	31.3253	32.373	38.6183	46.0324	54.821	65.221	77.5035	91.9758	108.982	128.9	129.839	130.056	148.023	163.148	175.302	184.302	189.873	174.178	157.312	162.39	167.201	171.741	176.011	180.008	183.73	187.177	190.346	193.233	195.837	217.329	237.712	256.975	275.105	292.089	296.506	300.305	303.47	305.986	307.831	388.279
604	0	0	0	0	52.7387	187.361	665.507	2363.45	2595.53	2788.3	2877.17	2948.44	3017.72	3084.4	3147.81	3207.14	3261.45	3309.63	3350.37	3587.67	3781.81	3811.87	3808.68	3769.28	3689.37	3562.29	1045.27	1061.72	1028.89	996.518	964.593	933.094	901.999	871.287	840.933	810.912	781.193	751.744	722.53	693.508	781.589	863.892	952.939	1055.48	1145.92	1297.28	1629.65	1841.99	1923.91
608	0	0	0	0	0	4.37136	15.5271	55.142	55.7798	61.3919	71.1774	69.9217	68.6762	67.4391	66.2093	64.9858	63.7675	62.5536	61.3436	60.1368	58.9328	103.916	146.982	188.133	227.374	264.706	413.974	631.916	665.554	698.567	730.956	762.72	793.86	824.376	854.267	883.533	912.175	940.193	967.586	994.355	1136.07	1351.1	1606.71	1911.88	2211.18	2495.45	2729.85	3007.76	3546.23
612	0	0	0	0	0	0	0	0	0	0	0	0	0	0	0	0	0	0	0	0	0	0	0	0	0	0	0	0	0	0	0	0	0	0	0	0	0	0	0	0	0	0	0	0	0	0	0	0	0
616	0	0	0	0	0	1.81652	3.73397	8.32363	25.655	52.6911	324.681	438.933	588.314	843.037	1183.02	1270.62	1336.4	1722.28	2077.54	2251.32	2404.36	2766.2	3965.92	5874	5565.32	5985.91	6973.88	7679.52	7877.73	8122.76	8372.21	8625.79	8883.13	9143.78	9407.22	9672.78	9939.7	10207	10473.6	10738.1	11152.3	11799.8	12469.4	13951.5	15322.3	17509.6	19505.7	20385.2	21214.5
620	0	0	0	0	3.81375	16.936	75.1961	333.81	458.611	616.683	797.605	856.714	827.194	797.644	768.043	664.525	566.85	542.883	518.746	617.98	704.591	833.786	943.063	1227.88	823.032	1109.53	1611.22	1480.45	1890.74	1916.37	1919.74	1922.2	1923.69	1926.79	1928.68	1929.27	1928.48	1926.21	1918.11	1909.01	1960.43	2015.18	2011.74	2100.41	2206.97	2318.88	2466.66	2549.81	2684.44
624	0	0	0	0	0	0	0.636804	2.82689	4.15866	6.11606	8.99208	10.098	11.3365	12.7232	14.2749	16.0107	17.9515	20.1205	22.5434	25.2484	28.267	31.6334	35.3858	39.5656	44.2186	49.3949	55.1493	61.5414	61.9875	62.473	63.0022	63.5802	64.2129	64.9071	65.6712	66.5149	67.4501	68.4912	69.6561	70.9671	72.4526	74.1494	76.106	78.3883	81.0881	84.3385	88.3408	93.4186	100.711
626	0	0	0	0	0	0	0	0	0	1.48168	1.77872	2.18362	2.68031	3.28941	4.03611	4.9512	6.07223	7.44502	9.12542	11.1815	13.6961	16.7701	20.5259	25.1125	30.7107	37.5395	45.8644	56.0068	56.5871	57.1696	57.7544	58.3412	58.93	59.5206	60.1129	60.7067	61.3019	61.8984	62.4959	67.334	72.5408	78.1441	84.1734	90.6604	93.7335	96.9025	100.17	103.538	107.628
630	0	0	0	0	0	0	0	0	0	0	0	0.00750991	0.0108909	0.0157756	0.0228222	0.0329704	0.047558	0.0684827	0.0984256	0.141155	0.201934	0.288059	0.409538	0.579911	0.817136	1.14431	1.58961	2.18401	2.80282	3.59615	4.61297	5.91586	7.58484	9.72215	12.4584	15.9601	20.4402	26.1697	33.4945	42.855	50.7882	58.3927	71.958	86.0434	101.119	115.834	129.606	144.448	175.098
634	0	0	0	0	0	0	0	0	0	0	0	0	0	0	0	0	0	0	0	0	0	0	0	0	0	0	0	0	0	0	0	0	0	0	0	0	0	0	7.25962	7.39299	7.5154	7.62413	7.71587	7.7865	7.5241	7.23989	6.92935	6.58614	6.23666
638	0	0	0	0	0	0	0	0	0	0	0	0.123888	0.149925	0.181248	0.218873	0.263991	0.317993	0.38249	0.459339	0.550656	0.658821	0.78647	0.936449	1.11172	1.3152	1.54942	1.81599	2.11466	2.50433	2.96538	3.51079	4.15587	4.9187	5.82061	6.88676	8.1468	10.3062	12.3997	14.3068	16.0728	17.3506	19.9495	20.6185	30.4972	33.443	32.56	29.5938	30.0644	29.9232
642	0	0	0	0	0	27.9839	138.054	680.942	1869.7	2790.13	3840.01	3710.72	3581.34	3020.31	2491.44	2194.23	1912.93	2013.66	2097.1	2329.16	2525.82	2685.74	2807.06	3937	3043.79	4470.37	4040.48	4453.04	5220.93	5478.65	5745.82	6022.32	6307.96	6602.42	6905.25	7215.85	7533.39	7856.85	8184.87	8515.76	9159.05	9421.13	9672.75	10014.1	10292.8	10512.1	10657.3	10749.6	11030.1
643	0	0	0	0	0	182.455	210.026	241.719	278.142	2322.99	2671.98	2955.46	3227.71	3488.73	3738.53	3671.17	3603.8	3831.15	4047.26	4252.15	4445.81	6534	9598.92	9724.98	9515.84	11990.2	14651	16222.7	18229.8	20202.5	22140.6	24044.3	25984.9	27843.9	29675.8	31482.9	33268.1	35034.8	36711.2	38662.2	40822	47902.5	51356.7	58464.5	62760.5	71655	81688.8	90960.4	113132
646	0	0	0	0	0	0	0.721642	2.84756	3.52243	4.29662	5.12619	7.24752	10.2395	14.456	20.3929	28.7439	40.4788	56.9505	80.0437	96.5752	111.729	130.888	148.264	163.86	177.677	189.712	199.232	207.018	207.291	207.404	207.601	207.892	208.288	208.801	209.447	210.244	211.212	212.378	213.773	215.438	217.422	219.79	222.625	226.041	230.193	235.305	241.709	249.928	262.36
654	0	0	0	0	0	0	0	0	0	0	0	0.00252336	0.00309509	0.00379519	0.00465215	0.00570071	0.00698319	0.00855113	0.0104672	0.0128077	0.0156653	0.0191524	0.0234056	0.0285903	0.0349071	0.0425985	0.0519579	0.0633395	0.0785267	0.0973491	0.120675	0.14958	0.185396	0.229772	0.28475	0.352857	0.437221	0.541716	0.671135	0.831408	1.02987	1.27562	1.57986	1.95652	2.15357	2.37027	2.53365	2.69347	2.25138
659	0	0	0	0	0	0	0	0	0	0	0	0.000110468	0.000215887	0.000421735	0.00082351	0.00160734	0.00313581	0.00611487	0.0119182	0.0232175	0.0452052	0.0879674	0.171083	0.332529	0.645925	1.25386	2.43233	4.71501	5.05658	5.42253	5.81457	6.23452	6.68433	7.16609	7.682	8.23446	8.82597	9.45926	10.1372	10.3746	10.6167	10.8635	11.5894	11.4401	13.3662	13.7666	14.5628	14.4132	14.6645
660	0	0	0	0	0	0	0	0	0	0	0	0	0	0	0	0	0	0	0	0	0	0	0	0	0	0	0	0	0	0	0	0	0	0	0	0	0	0	0	0	0	0	0	0	0	0	0	0	0
662	0	0	0	0	0	0	0	0	0	0	0	0.185035	0.195397	0.206125	0.217198	0.228587	0.240253	0.252145	0.264198	0.276329	0.288433	0.300377	0.311993	0.32307	0.333334	0.342433	0.349898	0.355096	0.379105	0.404677	0.431907	0.460896	0.491749	0.52458	0.559506	0.596652	0.636148	0.67813	0.722743	0.73552	0.748368	0.76128	0.774244	0.787251	0.80118	0.815157	0.82917	0.843204	0.86219
666	0	0	0	0	0	0	0	0	0	0	0	2.79256e-05	5.49702e-05	0.000108173	0.000212801	0.000418488	0.000822705	0.00161678	0.00317614	0.00623708	0.0122431	0.0240226	0.0471154	0.0923657	0.18099	0.354478	0.693906	1.35763	1.45734	1.56428	1.67895	1.8019	1.93373	2.07506	2.22656	2.38895	2.563	2.74952	2.9494	3.02136	3.09483	3.16983	3.24639	3.32453	3.40804	3.49336	3.58049	3.66948	3.78202
670	0	0	0	0	0	0	0	0	0	0	0	0.000144072	0.0002784	0.000537308	0.00103559	0.00199301	0.00382923	0.00734362	0.0140541	0.0268327	0.0510899	0.0969641	0.183327	0.345003	0.645501	1.19871	2.20362	3.99252	4.24855	4.51969	4.80665	5.1102	5.4311	5.77011	6.128	6.50554	6.90349	7.32258	7.7635	7.85711	7.94768	8.03477	8.11792	8.19662	8.2795	8.3569	8.42807	8.49222	8.59772
674	0	0	0	0	0	0	0	0	0	0	0	0.0251601	0.0252347	0.0253018	0.0253612	0.0254125	0.0254554	0.0254893	0.0255141	0.0255293	0.0255344	0.0255292	0.0255131	0.0254857	0.0254465	0.0253951	0.0253311	0.0252538	0.0263703	0.0275344	0.0287479	0.0300129	0.0313315	0.0327057	0.0341377	0.0356299	0.0371846	0.0388043	0.0404914	0.0422486	0.0440787	0.0459843	0.0479685	0.0500341	0.0521843	0.0544222	0.0567512	0.0591745	0.0930775
678	0	0	0	0	0	0	0	0	0	0	0	0.163034	0.200399	0.246252	0.302501	0.371478	0.45603	0.559631	0.686519	0.841858	1.03194	1.26442	1.54862	1.89586	2.31988	2.83736	3.46852	4.23784	4.5711	4.93638	5.33686	5.77605	6.25781	6.78638	7.36643	8.00307	8.70193	9.46919	10.3116	11.2367	12.2527	13.3685	14.594	15.9401	17.4186	19.0426	20.8265	22.786	25.0821
682	0	0	0	0	0	0	0	0	0	0	0	0	0	0	0	0	0	0	0	0	0	0	0	0	0	0	0	0	0	0	0	0	0	0	0	0	0	0	1183.45	1155.79	1158.57	1147.56	1135	1120.72	1104.51	1098.01	1091.79	1082.26	1074.94
686	0	0	0	0	0	0.5177	2.04319	8.06232	10.9817	14.9052	20.1705	24.8581	30.6254	37.7185	46.4389	57.1555	70.3201	86.4848	106.325	130.664	160.508	197.085	241.889	296.742	363.858	445.931	546.23	668.723	672.956	677.572	682.614	688.131	694.179	700.826	708.15	716.245	725.227	735.232	746.431	759.038	773.322	789.634	808.431	830.336	856.214	887.309	925.503	1002.57	1248.74
690	0	0	0	0	0	0	0	0	0	0	0	0.152129	0.183753	0.221682	0.267083	0.321308	0.385915	0.462669	0.553552	0.660745	0.786579	0.933445	1.10361	1.29892	1.52024	1.76648	2.03286	2.30751	2.3165	2.32488	2.33261	2.33967	2.34601	2.35159	2.35637	2.36029	2.36332	2.36539	2.36644	2.39907	2.43097	2.46203	2.49212	2.5211	2.59353	2.66624	2.73898	2.81146	2.9
694	0	0	0	0	0	0	0	0	1.68902	2.01583	2.31064	2.48071	2.65997	2.84828	3.04529	3.25046	3.4629	3.68135	3.90403	4.12845	4.35126	4.56782	4.77178	4.95426	5.10254	5.19772	5.2099	5.08697	5.53612	6.0215	6.54542	7.11024	7.71828	8.3718	9.07296	9.8237	10.6257	11.48	12.3873	13.3472	14.3582	15.1254	15.8995	16.6741	24.4182	35.6575	51.9057	75.2914	109.407
702	0	0	0	0	0	0	0	0	0	0	0	0.00378961	0.00548527	0.00792869	0.0114431	0.0164872	0.0237096	0.0340224	0.0487005	0.0695117	0.0988822	0.140095	0.197501	0.276693	0.38447	0.528233	0.713774	0.938517	1.18919	1.5059	1.90574	2.41007	3.04554	3.84539	4.85092	6.11328	7.69566	9.67572	12.1485	15.2293	19.0575	23.7989	29.6486	36.8311	45.5967	56.2104	68.9259	83.9313	101.823
703	0	0	0	0	0	6.74061	33.2537	164.022	250.594	374.933	540.306	523.062	505.787	488.469	471.095	453.649	436.113	418.463	400.67	430.104	454.713	517.469	651.724	918.943	715.472	795.812	1094.54	894.986	915.716	936.627	957.696	978.894	1000.19	1021.55	1042.94	1064.31	1085.61	1106.8	1127.81	1170.4	1213.88	1258.16	1303.13	1348.7	1367.61	1385.54	1402.31	1417.74	1434.46
704	0	0	0	0	0	7.25946	28.7928	114.246	111.508	126.039	159.346	168.293	177.737	187.699	198.197	209.252	220.881	233.107	245.947	254.414	262.363	334.03	402.479	467.724	529.774	588.638	719.107	842.935	918.657	993.046	1066.1	1137.83	1208.22	1277.28	1345.01	1411.4	1476.47	1540.2	1602.6	1663.67	1849.13	2031.01	2209.31	2384.03	2555.17	3058.21	3730.41	4441.03	5218.52
705	0	0	0	0	0	4.11033	19.3234	90.8261	132.005	187.663	256.226	256.745	256.943	256.79	256.247	255.276	253.827	251.848	249.274	246.027	242.015	237.119	231.188	224.021	215.336	204.719	191.503	174.494	177.883	181.235	184.536	187.773	190.93	193.988	196.928	199.726	202.355	204.784	206.978	212.867	218.567	224.001	229.075	233.669	248.28	262.839	276.989	290.214	303.492
706	0	0	0	0	0	0	0	0	0	0	0	0	0	0	0	0	0	0	0	0	0	0	0	0	0	0	0	0	0	0	0	0	0	0	0	0	0	0	366.355	366.668	384.449	396.594	409.088	421.941	439.74	458.25	477.497	497.507	521.298
710	0	0	0	0	0	0	0	0	0	0	0	0	0	0	0	0	0	0	0	0	0	0	0	0	0	0	141.849	395.965	770.753	749.962	729.403	709.075	688.978	669.113	649.48	630.078	610.909	591.972	573.268	554.796	536.556	518.55	605.004	739.264	971.739	1905.73	2317.87	3203.06	4281.38
716	0	0	0	0	0	0.613644	2.72458	12.0949	17.9768	26.7123	39.6822	44.6088	50.1324	56.3228	63.2578	71.0235	79.7158	89.4405	100.315	115.699	130.412	127.833	125.253	122.67	120.084	234.993	249.347	262.815	265.182	268.082	271.22	274.626	278.333	282.379	286.811	291.685	297.068	303.043	309.713	317.205	325.685	335.368	346.537	359.583	375.053	393.744	416.881	446.45	488.756
724	0	0	0	3.48512	16.4293	67.9235	270.524	1337	2574.9	5656.22	5645.62	5899.52	5617.23	5328.79	4738.79	4144.47	4286.45	4423.86	4556.19	4682.96	5240.32	6363.98	8613.13	6261.5	7326.38	9472.15	8800.33	9785.76	9984.87	10187.2	10392.8	10601.6	10813.8	11029.2	11247.9	11469.9	11695.3	11923.9	12155.8	12884.1	12756.8	13703.6	14819.5	15217.1	15595.1	15880.3	16022.2	16860.9	17546.2
732	0	0	0	0	0	0	0	0	0	0	0	0	0	0	0	0	0	0	0	0	0	0	0	0	0	0	0	0	0	0	0	0	0	0	0	0	0	0	0	0	0	0	0	0	0	0	0	0	0
736	0	0	0	0	0	25.69	126.972	627.672	1070.66	1821.04	3090.42	3148.3	3206.26	3264.23	3322.14	3379.91	3437.45	3494.68	3551.5	3760	3958.81	4018.21	4072.45	4329.64	4573.64	4804.33	5060.83	5302.18	5305.2	5302.12	5300.37	5300.1	5301.48	5304.7	5310.01	5317.67	5328.01	5341.42	5358.39	5379.51	5405.52	5437.37	5476.28	5523.9	5582.44	5655.06	5746.37	5863.55	6053.24
740	0	0	0	0	0	0	0	1.34591	2.46309	4.40894	7.57863	7.98817	8.40929	8.84043	9.27955	9.724	10.1704	10.6145	11.0507	11.4721	11.8697	12.2316	12.5426	12.7817	12.9197	12.914	12.6976	12.1535	12.9832	13.8614	14.7897	15.7693	16.8013	17.8864	19.0248	20.216	21.4588	22.7507	24.0881	25.0109	25.9245	26.8182	27.6789	28.4895	30.3109	32.1202	33.8675	35.4797	37.0592
744	0	0	0	0	0	0	0	0	0	0	0	0	0	0	0	0	0	0	0	0	0	0	0	0	0	0	0	0	0	0	0	0	0	0	0	0	0	0	0	0	0	0	0	0	0	0	0	0	0
748	0	0	0	0	0	0	0	0	0	0	0	0	0	0	0	0	0	0	0	0	0	0	0	0	0	0	0	0	0	0	0	0	0	0	0	0	0	0	22.996	24.7393	26.6145	28.6312	30.8	33.1324	35.6406	38.3376	41.2374	44.3552	47.9824
752	0	0	0	0	0	0	0	0.59621	2.94021	28.9938	228.683	494.647	519.669	541.279	559.426	574.039	585.03	592.276	595.616	594.835	589.632	647.604	693.587	1313.07	479.47	518.181	718.714	1174.17	1202.96	1209.47	1329.1	1389.87	1410.94	1501.32	1571.55	1598.33	1636.45	1731.18	1850.21	2079.57	2424.44	2739.53	3152.93	3607.39	4061.24	4207.39	4138.47	4156.75	4202.17
756	0	0	0	0	0	1.23335	9.12681	54.0208	98.8694	265.503	1141.28	1103.86	1066.34	1028.68	990.847	952.802	914.489	875.845	836.786	796.411	755.466	951.698	1118.5	1672.28	1162.63	1421.27	1602.84	1761.31	1774.34	1786.45	1797.54	1807.52	1816.25	1823.62	1829.47	1833.64	1835.95	1836.17	1834.09	1983.17	2082.77	2171.86	2254.82	2276.52	2322	2294.4	2203.41	2300.82	2405.8
760	0	0	6.74815	29.9774	133.146	591.274	2625.26	2928.17	2484.5	2939.99	3260.9	4384.61	5893.47	7918.73	6204.34	4859.27	3804.31	2977.18	2328.92	4192.67	2003.76	2087.46	2167.57	2244	1768.17	1865.7	2143.27	2120.22	2116.89	2113.36	2109.63	2105.7	2101.56	2097.21	2092.66	2087.91	2082.94	2077.77	2072.4	2066.81	2136.27	2186.96	2238.68	2291.43	2345.22	2624.89	2899.32	2822.36	2762.12
762	0	0	0	0	4.82694	16.672	57.574	198.786	212.83	223.306	226.057	234.367	242.718	251.068	259.368	267.562	275.579	283.339	290.744	291.723	291.295	289.404	297.892	303.382	305.683	304.521	317.634	323.056	341.178	354.448	368.141	382.262	396.815	411.804	427.232	443.098	459.404	476.145	493.318	510.916	528.931	547.348	566.154	585.328	604.846	624.678	644.791	665.141	689.636
764	0	0	0	0	0	2.02818	16.5094	79.9508	90.1112	103.667	248.899	268.89	288.046	306.37	323.868	340.54	356.389	371.416	385.622	399.006	411.57	483.784	552.658	618.197	680.406	739.288	812.913	882.382	882.257	891.34	900.457	909.607	918.787	927.995	937.229	946.487	955.767	965.067	1020.45	1074.7	1127.84	1179.86	1230.76	1402.5	1570.88	1902.93	2237.97	2595.65	3269.9
768	0	0	0	0	0	2.77815	10.9644	43.265	59.1889	80.6197	109.417	123.32	138.944	156.497	176.207	198.33	223.15	250.982	282.176	317.12	356.243	400.019	448.974	503.686	564.79	632.988	709.047	793.808	790.299	786.755	783.174	779.558	775.904	772.214	768.488	764.724	760.923	757.084	753.207	753.071	752.875	752.62	752.303	751.924	760.428	768.962	777.524	786.111	799.305
772	0	0	0	0	0	0	0	0	0	0	0	0	0	0	0	0	0	0	0	0	0	0	0	0	0	0	0	0	0	0	0	0	0	0	0	0	0	0	0	0	0	0	0	0	0	0	0	0	0
776	0	0	0	0	0	0	0	0	0	2.37198	2.15548	2.19379	2.23014	2.26419	2.29551	2.32364	2.34801	2.36802	2.3829	2.39179	2.39363	2.38713	2.37068	3.33765	4.6683	6.47323	8.86881	11.9345	12.3397	12.7541	13.1773	13.6089	14.0487	14.4959	14.9502	15.4107	15.8765	16.3466	16.8199	17.3429	17.8688	18.3957	18.9211	19.4425	19.5582	19.651	19.7176	19.7544	19.8711
780	0	0	0	0	0	0	0	0	0	0	0	1.73041e-05	3.33959e-05	6.43635e-05	0.000123858	0.000237943	0.000456242	0.000872934	0.00166608	0.00317081	0.00601424	0.0113616	0.0213571	0.0398964	0.0739212	0.135431	0.244042	0.42797	0.628575	0.922662	1.35347	1.98406	2.90625	4.25359	6.21998	9.0864	13.2593	19.325	28.1271	40.8751	42.5599	28.6872	48.9817	59.9639	69.7572	91.9513	108.961	118.499	148.619
784	0	0	0	0	0	0	0	0	0	0	0	0	0	0	0	0	0	0	0	0	0	0	0	0	0	0	0	0	0	0	0	0	0	0	0	0	0	0	19.4408	19.8011	20.1327	20.4285	20.6796	20.8753	21.0291	21.0966	21.0545	20.871	20.6187
788	0	0	0	0	36.4548	179.876	887.388	1099.75	1036.8	1363.2	1680	1842.98	1996.1	1847.76	1705.06	1567.9	1436.19	1397.18	1613.37	1609.42	1603.66	1479.35	1511.34	1466.05	1137.07	1101.77	1333.66	1032.55	1023.94	1030.12	1036.95	1044.51	1052.89	1062.18	1072.51	1084.02	1096.88	1111.32	1127.58	1146	1166.99	1191.08	1218.99	1251.68	1290.47	1337.29	1395.05	1468.41	1574.44
792	0	0	0	168.055	497.619	3110.12	5028.16	6750.79	12792.2	17966.1	21958.2	23174.4	24294.3	21941.3	19680.9	17513	15437.8	16446	17350.9	18498.7	19511.1	13717.5	15517.4	17093.8	13114.6	13388	16112	15907.1	15870	15872.6	15870.4	15863.3	15850.9	15832.8	15808.6	15777.9	15740	15694.4	15640.3	15577	15859.5	16083.5	16296.5	16495.9	16678.3	16635.1	16539.8	16410.9	16333.1
795	0	0	0	0	4.21103	14.5447	50.2277	173.421	191.426	210.008	228.532	239.28	250.432	261.993	273.969	286.362	299.177	312.412	326.068	327.387	328.229	341.745	354.06	365.188	378.586	400.637	453.092	485.91	513.954	537.662	562.425	588.287	615.295	643.497	672.942	703.682	735.772	769.265	804.221	840.698	878.759	918.467	959.889	1003.09	1048.15	1095.14	1144.13	1195.2	1255.64
796	0	0	0	0	0	0	0	0	0	0	0	4.7113e-06	9.13068e-06	1.7679e-05	3.41961e-05	6.60727e-05	0.000127514	0.000245774	0.000473048	0.000909086	0.00174407	0.00333958	0.00638101	0.0121626	0.0231174	0.0437952	0.0826453	0.155222	0.165898	0.177288	0.189436	0.202391	0.216205	0.230932	0.246629	0.263357	0.281182	0.300169	0.320393	0.326559	0.332793	0.339093	0.345458	0.351884	0.358769	0.365725	0.372751	0.379843	0.389231
798	0	0	0	0	0	0	0	0	0	0	0	0.00164085	0.0024068	0.00352895	0.00517225	0.00757764	0.011097	0.0162436	0.0237664	0.0347566	0.0508039	0.0742222	0.108377	0.158162	0.230682	0.33625	0.489821	0.713059	0.744081	0.7764	0.810069	0.84514	0.881668	0.91971	0.959323	1.00057	1.04351	1.08822	1.13475	1.18646	1.24043	1.29675	1.35552	1.41683	1.45123	1.48633	1.52214	1.55868	1.60516
800	0	0	0	0	0	4.1671	15.1281	54.974	67.5225	82.964	101.969	125.467	154.335	189.787	233.307	286.714	352.225	432.553	531.004	608.175	682.075	786.145	885.615	980.467	1070.68	1156.25	1320.13	1475.68	1478.15	1480.89	1484.18	1488.08	1492.65	1497.97	1504.15	1511.3	1519.56	1529.09	1540.09	1552.81	1567.58	1584.79	1604.98	1628.84	1657.35	1691.89	1734.49	1788.36	1869.62
804	0	0	0	0	0	0	110.242	133.556	161.769	195.904	237.196	263.018	291.566	323.115	357.966	396.446	438.916	485.765	537.42	594.344	654.119	1011.95	1564.88	1612.56	1660.93	2279.89	2932.45	4021.1	4689.21	5168.21	5695.77	6276.76	6916.54	7239.96	7577.96	7931.17	8300.23	8685.83	9088.65	9648.63	10267.7	11077.2	11505.2	13017.9	14508.3	16938.6	19749	23827.6	29278.9
807	0	0	0	0	0	2.92761	14.4429	71.2384	109.082	163.803	237.725	233.546	229.406	225.087	220.579	215.872	210.955	205.814	200.434	194.795	188.875	190.113	190.205	189.097	186.713	182.943	207.866	191.422	190.523	194.205	197.917	201.658	205.425	209.216	213.028	216.857	220.7	224.552	228.411	244.94	262.588	281.422	301.511	322.926	356.547	393.523	434.168	478.816	530.876
818	0	0	0	14.8452	65.6761	290.845	2144.1	3182.16	2700	2840	4200	4247.5	4264.69	3732.16	3241.23	2639.67	2098.8	2198.21	2260.96	2397.86	2482.35	1955.31	1616.19	1692.56	1286.75	1107.35	1187.4	898.411	857.289	817.35	778.581	740.965	704.487	669.131	634.882	601.724	569.642	538.62	583.443	625.056	663.521	698.901	731.258	631.512	699.449	774.239	1041.72	1223.19	1359.85
826	0	0	0	0	0	2.05101	6.07099	80.8509	221.943	519.903	1644.06	1722.21	1757.44	1790.92	1822.27	1312.82	839.118	802.782	1118.56	1771.66	2351.07	3391.57	5378.27	6798.55	2854.05	2786.02	3479.34	4206.24	4480.37	4750.09	4976.13	5273.27	5555.3	5642.09	5714.6	5765.82	5515.63	5229.54	4531.61	5175.07	5226.53	6135.42	5597.66	4662.68	6049.82	6527.3	6897.69	7313.48	7702.45
834	0	0	0	0	0	3.61701	14.4111	57.9177	79.3398	109.608	152.715	178.772	209.216	244.775	286.294	334.754	391.293	457.232	534.102	611.743	686.099	1072.64	1443.59	1798.87	2138.44	1357.14	1612.78	1855.91	1866.07	1872.62	1880	1888.32	1897.69	1908.24	1920.11	1933.49	1948.59	1965.67	1985.06	2007.16	2032.46	2061.62	2095.48	2135.17	2182.26	2238.98	2308.68	2396.61	2526.18
840	0	0	0	0	0	0	0	0	51.4546	377.609	743.718	766.038	788.798	811.989	835.599	859.617	884.027	908.813	933.954	1033.82	1129.62	1200.46	1309.37	1396.84	1528.36	1643.21	759.476	940.684	1291.21	1664.47	2096.81	2551.02	3070.41	3671.01	4393.24	5289.38	6431.3	9045.17	12429.3	17023.3	23851.5	33764.6	45835	64470.7	72699.8	107947	133367	151638	174743
850	0	0	0	0	0	0	0	0	0	0	0	8.34681e-05	0.000161575	0.000312443	0.000603496	0.00116424	0.00224297	0.00431478	0.00828668	0.0158857	0.0303904	0.0580027	0.110406	0.209494	0.396039	0.745336	1.39492	2.59211	2.87701	3.19274	3.54254	3.93002	4.35915	4.83428	5.36025	5.94235	6.58642	7.29886	8.08674	7.97844	7.86991	7.76113	7.65211	7.54282	7.06515	6.61604	6.19385	5.79701	5.45534
854	0	0	0	0	0	2.62517	11.6558	51.7421	75.9028	111.299	163.131	181.61	202.122	224.882	250.127	278.114	309.127	343.479	381.508	423.586	470.121	521.553	578.364	641.077	710.261	786.528	870.542	963.019	958.419	959.394	960.692	962.351	964.41	966.918	969.932	973.519	977.76	982.752	988.613	995.491	1003.57	1013.09	1024.35	1037.77	1053.92	1073.58	1097.96	1128.89	1176.23
858	0	0	0	0	0	0	2.97879	9.79513	9.99777	10.0067	9.67794	10.4131	11.1928	12.0177	12.888	13.8035	14.7628	15.7638	16.8029	17.8749	18.9722	20.0843	21.1969	22.29	23.3364	24.298	25.1207	25.7251	26.6845	27.6742	28.6946	29.7463	30.8296	31.9452	33.0932	34.274	35.4879	36.735	38.0153	39.3289	52.1666	68.3188	89.4429	157.962	223.842	297.003	430.515	562.76	631.827
860	0	0	0	0	0	25.1867	86.978	300.309	361.198	432.098	514.697	543.987	574.757	607.064	640.966	676.521	713.786	752.82	793.676	813.569	832.246	881.5	928.387	972.882	1014.96	1063.03	1191.01	1312.82	1387.02	1452.68	1521.35	1593.16	1668.24	1746.74	1828.8	1914.58	2004.24	2097.94	2195.85	2298.16	2405.04	2516.7	2633.32	2755.12	2882.31	3015.11	3153.75	3298.47	3469.43
862	0	0	0	0	0	36.7239	120.781	397.163	404.749	404.084	388.898	396.014	402.809	409.22	415.179	420.605	425.407	429.482	432.707	413.193	393.498	398.472	400.436	399.207	394.528	386.025	355.361	403.575	402.063	400.446	398.721	396.883	394.928	392.853	390.653	388.323	385.858	383.252	380.501	457.622	550.107	660.943	793.674	952.498	1047.18	1150.5	1275.27	1272.15	1262.24
876	0	0	0	0	0	0	0	0	0	0	0	0	0	0	0	0	0	0	0	0	0	0	0.193137	0.283431	0.415746	0.609533	0.893196	1.30818	1.36593	1.42613	1.48889	1.55431	1.6225	1.69355	1.7676	1.84474	1.92512	2.00885	2.09605	2.19296	2.29416	2.39984	2.51019	2.62539	2.69083	2.75767	2.82593	2.89561	2.92514
882	0	0	0	0	0	0	0	0	0	0	0	0.0169097	0.0249903	0.0369208	0.0545288	0.0805068	0.118819	0.1753	0.258531	0.381129	0.561637	0.827284	1.21804	1.79255	2.63678	3.87668	5.69666	8.36653	8.73829	9.12598	9.53023	9.95172	10.3911	10.8492	11.3267	11.8243	12.3429	12.8832	13.4462	14.0717	14.7252	15.4078	16.1206	16.8651	18.8032	20.9622	23.367	26.0454	19.1577
887	0	0	0	0	0	0	0	0	0	0	0	0	0	0	0	0	0	0	0	0	0	0	0	0	0	0	0	0	0	0	0	0	0	0	0	0	0	0	1454.5	1433.27	1407.33	1393.96	1378.71	1361.35	1341.66	1343.03	1339.05	1329.24	1320.52
891	0	0	0	0	0	6.49876	38.4727	227.717	419.159	757.459	1326.19	1276.04	1236.46	1196.87	1157.25	1117.58	1077.84	1037.99	998.006	1036.62	1068.2	1116.47	3097.15	1185.12	871.869	1055.72	1208.75	1124.68	1154.47	1183.09	1210.56	1236.86	1262.01	1286.02	1308.87	1330.58	1351.15	1370.59	1388.89	1406.06	1422.11	1437.03	1770.42	2092.49	2403.26	2702.77	2991.05	3268.11	3554.38
894	0	0	0	0	0	1.4043	6.2351	27.6788	42.7181	65.6028	100.345	113.114	127.465	143.59	161.699	182.028	204.838	230.419	259.094	299.583	338.523	399.181	457.428	513.237	566.58	617.433	656.69	693.775	697.917	705.711	714.139	723.274	733.205	744.035	755.888	768.91	783.281	799.219	816.995	836.952	859.524	885.28	914.974	949.637	990.716	1040.33	1101.71	1180.12	1292.25
	0	0	19.4519	3483.49	7445.49	19483.1	52084.2	88806.3	131294	208126	348387	339985	329652	301487	289938	276227	269338	262152	257205	269381	269302	314473	349727	349868	305178	343534	351730	371302	383397	395837	406715	417101	432000	443094	454804	468382	482815	499617	521466	543471	570154	607289	643054	682496	709944	774778	834777	890731	982320
[truncated: 108 more columns]

## Sheet: lower2
ISO1	y-10000	y-9000	y-8000	y-7000	y-6000	y-5000	y-4000	y-3000	y-2000	y-1000	y0	y100	y200	y300	y400	y500	y600	y700	y800	y900	y1000	y1100	y1200	y1300	y1400	y1500	y1600	y1700	y1710	y1720	y1730	y1740	y1750	y1760	y1770	y1780	y1790	y1800	y1810	y1820	y1830	y1840	y1850	y1860	y1870	y1880	y1890	y1900	y1910
4	0	0	0	0	0	0	0	0	0	0	0	0	0	0	0	0	0	0	0	71.4217	205.823	355.185	512.833	451.6	577.751	710.283	997.045	1097.12	1165.51	1233.98	1304.64	1377.54	1452.75	1530.3	1610.27	1692.71	1777.68	1865.23	1955.43	2048.34	2165.92	2338.15	2522.32	2719.2	2929.58	3201.26	3535.49	3902.44	4249.01
8	0	0	0	0	0	0	0	0	0	0	0	0	0	0	0	0	0	0	0	5.3038	15.4136	24.8022	33.3855	41.0542	47.6621	53.0034	56.7687	87.6691	93.5801	99.5682	105.617	111.708	117.823	123.941	130.041	136.098	142.087	147.979	153.744	159.347	163.308	174.195	185.443	204.873	223.846	245.872	266.98	291.422	310.061
12	0	0	0	0	0	0	0	0	0	0	0	0	0	0	0	0	0	0	0	51.6588	162.628	256.287	338.709	373.786	385.315	448.696	748.95	635.822	688.175	742.364	798.362	856.144	915.682	976.951	1039.93	1104.58	1170.88	1238.81	1308.35	1379.45	1655.82	1942.74	2240.07	2547.64	2865.3	3192.89	3530.26	3877.26	4178.49
16	0	0	0	0	0	0	0	0	0	0	0	0	0	0	0	0	0	0	0	0.00184748	0.00804661	0.0194014	0.0391214	0.0720381	0.125162	0.208106	0.332691	0.509491	0.550832	0.594358	0.640107	0.688105	0.738364	0.790876	0.845613	0.902515	0.961489	1.0224	1.08505	1.15237	1.22121	1.29112	1.36151	1.4316	1.5991	1.77942	1.97115	2.17148	2.34444
20	0	0	0	0	0	0	0	0	0	0	0	0	0	0	0	0	0	0	0	0.0383619	0.113621	0.186281	0.255382	0.319671	0.377456	0.426333	0.462637	0.48013	0.518806	0.55947	0.602147	0.646847	0.693564	0.74227	0.792911	0.845404	0.899623	0.955395	1.01248	1.07058	1.12927	1.18803	1.24615	1.30273	1.35657	1.40609	1.44912	1.48264	1.48273
24	0	0	0	0	0	0	0	0	0	0	0	0	0	0	0	0	0	0	0	14.9458	55.2658	107.619	172.442	249.788	356.696	482.466	592.334	711.818	351.653	370.322	389.684	409.805	430.766	452.657	475.586	499.678	525.086	551.991	580.617	611.237	644.199	679.944	719.049	762.285	810.714	865.85	929.953	1006.58	1087.45
28	0	0	0	0	0	0	0	0	0	0	0	0	0	0	0	0	0	0	0	0.0740204	0.242466	0.441295	0.674749	0.947628	1.26536	1.63408	2.06077	2.55332	2.94968	3.40254	3.91957	4.50942	5.1819	5.94807	6.82046	7.81319	8.94224	10.2256	11.6837	13.3395	15.2188	16.3376	16.3767	15.1148	13.8691	12.9378	12.7495	11.7346	10.5145
31	0	0	0	0	0	0	0	0	0	0	0	0	0	0	0	0	0	0	0	3.08791	9.79196	24.5535	45.9698	74.0983	72.6638	107.656	149.491	198.224	134.35	151.187	169.9	190.686	213.76	239.36	267.747	299.208	334.058	372.646	415.35	462.592	514.83	572.57	636.367	706.831	784.629	870.497	965.239	1069.74	1169.51
32	0	0	0	0	0	0	0	0	0	0	0	0	0	0	0	0	0	0	0	2.35981	8.09076	15.411	24.6576	36.2315	50.6091	68.3551	90.1386	116.751	138.767	164.69	195.189	231.04	273.15	322.577	380.552	448.508	528.113	621.31	730.356	867.107	1017.76	1193.77	1400.05	1640.06	1934.41	2263.4	2646.89	3093.77	6992.45
36	0	0	0	0	0	0	0	0	0	0	0	0	0	0	0	0	0	0	0	0	0	0	0	0	0	0	0	0	0	0	0	0	0	0	0	0	4.86484	10.1019	14.4763	19.6685	30.6333	58.5558	156.644	389.756	734.339	1574.73	1911.44	3130.8	4989.45
40	0	0	0	0	0	0	0	0	0	0	0	0	0	0	0	0	0	0	0	17.6471	61.7647	132.353	257.353	529.411	404.408	764.615	925.13	1041.71	1135.4	1230.92	1327.37	1423.59	1518.13	1602.34	1676.15	1741.8	1787.41	1786	1754.56	1790.89	1893.07	1910.79	1938.36	1981.1	2031.07	2116.81	2189.93	2283.89	2330.43
44	0	0	0	0	0	0	0	0	0	0	0	0	0	0	0	0	0	0	0	0.00138432	0.0045305	0.00823727	0.0125806	0.0176455	0.0235273	0.0303327	0.038181	0.0472056	0.053907	0.0614686	0.0699947	0.0796018	0.0904199	0.102594	0.116286	0.131677	0.148968	0.168384	0.190175	0.201972	0.214346	0.30585	0.385127	0.472499	0.628783	0.824192	1.0673	1.36843	1.71725
48	0	0	0	0	0	0	0	0	0	0	0	0	0	0	0	0	0	0	0	0	0	0	0	0	0	0	0	0	0	0	0	0	0	0	0	0	0	0	0.886562	0.944161	1.00411	1.06635	1.13082	1.19739	1.26752	1.33954	1.41316	1.48801	1.54318
50	0	0	0	0	0	0	0	0	0	0	0	0	0	0	0	0	0	0	0	78.4941	260.894	451.765	656.188	843.67	1167.81	1468.19	2201.57	3058.79	3261.77	3450.99	3644.61	3842.08	4042.65	4245.28	4448.59	4650.8	4849.67	5042.45	5225.91	5470.84	5704.26	5921.67	6119	6293.23	6499.1	6642.84	6958.46	7213.28	7306.17
51	0	0	0	0	0	0	0	0	0	0	0	0	0	0	0	0	0	0	0	2.18911	6.70932	16.1954	29.0697	44.7923	41.5132	57.8533	74.2118	90.4234	97.8835	105.761	114.067	122.814	132.01	141.661	151.774	162.348	173.382	184.868	196.793	209.134	221.863	234.937	248.3	261.878	275.575	289.265	302.785	315.924	324.12
52	0	0	0	0	0	0	0	0	0	0	0	0	0	0	0	0	0	0	0	6.76908e-05	0.000215411	0.000379852	0.00205668	0.010188	0.0477474	0.215052	0.937898	3.97124	4.09856	4.22294	4.34431	4.46258	4.57767	4.68948	4.79791	4.90287	5.00422	5.10187	5.97503	6.87116	7.78826	8.72423	9.67682	10.3636	11.0554	11.7503	12.4463	13.1412	13.5069
56	0	0	0	0	0	0	0	0	0	0	0	0	0	0	0	0	0	0	0	7.80898	25.9062	62.4413	125.852	214.454	158.852	274.822	350.873	416.672	468.285	521.308	575.54	630.763	686.744	743.23	799.947	856.594	912.837	968.31	1022.6	1075.24	1169.99	1179.71	1259.91	1342.01	1413.07	1538.85	1689.6	1741.3	1764.24
60	0	0	0	0	0	0	0	0	0	0	0	0	0	0	0	0	0	0	0	0.00181331	0.00576412	0.010151	0.0149658	0.0201784	0.025726	0.0314943	0.037286	0.0427607	0.0489921	0.056036	0.0639895	0.0729606	0.0830684	0.0944451	0.107236	0.121603	0.137721	0.155785	0.176007	0.198619	0.223875	0.252047	0.283432	0.31835	0.357142	0.400171	0.447819	0.500484	0.551293
64	0	0	0	0	0	0	0	0	0	0	0	0	0	0	0	0	0	0	0	0.142028	0.387349	0.586892	0.746953	0.960369	1.16408	1.56333	2.18648	2.81592	3.36471	3.74528	4.16506	4.62799	5.13839	5.70103	6.32113	7.00442	7.7572	8.5864	9.49962	11.4298	13.0212	15.914	17.4322	18.7326	20.6149	23.6898	25.1399	28.4872	34.9012
68	0	0	0	0	0	0	0	0	0	0	0	0	0	0	0	0	0	0	0	14.901	47.3486	84.0401	123.83	165.682	208.332	250.18	240.916	252.613	265.354	278.257	291.313	304.51	317.834	331.272	344.806	358.419	372.089	385.793	399.506	481.408	579.39	594.066	608.266	733.446	636.069	536.245	879.894	772.676	881.086
70	0	0	0	0	0	0	0	0	0	0	0	0	0	0	0	0	0	0	0	7.48978	22.163	37.8178	53.8629	69.9716	85.7418	100.661	133.453	140.192	153.2	164.125	175.545	187.472	199.917	212.891	226.402	240.457	255.063	270.222	285.936	307.948	331.263	355.922	381.962	409.417	457.941	511.576	570.757	635.93	698.319
72	0	0	0	0	0	0	0	0	0	0	0	0	0	0	0	0	0	0	0	0	0	0	0	0	0	0	0	0	0	0	0	0	0	0	0	0	0	0	66.935	70.5208	74.3869	78.5865	83.1891	88.2878	94.011	100.542	108.154	117.28	126.981
76	0	0	0	0	0	0	0	0	0	0	0	0	0	0	0	0	0	0	0	6.89031	21.0356	38.8398	59.6685	83.5216	110.399	150.51	46.0908	68.2825	77.1298	87.0616	98.1493	110.616	124.736	140.626	158.653	179.196	202.728	229.853	292.68	369.426	481.816	600.279	724.991	856.165	994.224	1132.38	1439.34	1783.64	2268.33
84	0	0	0	0	0	0	0	0	0	0	0	0	0	0	0	0	0	0	0	0.111234	0.353633	0.622866	0.918462	1.23864	1.57964	1.93458	2.29159	2.6302	2.93476	3.26903	3.63553	4.03698	4.47628	4.95653	5.481	6.0532	6.67683	7.35578	8.09417	8.49639	8.90829	9.32944	9.75925	10.1971	11.586	13.1485	14.9033	16.8708	18.824
86	0	0	0	0	0	0	0	0	0	0	0	0	0	0	0	0	0	0	0	0	0	0	0	0	0	0	0	0	0	0	0	0	0	0	0	0	0	0	0	0	0	0	0	0	0	0	0	0	0
90	0	0	0	0	0	0	0	0	0	0	0	0	0	0	0	0	0	0	0	0.00344036	0.0150289	0.036368	0.073664	0.136427	0.238844	0.401333	0.651675	1.02371	1.31885	1.69614	2.1778	2.79188	3.57379	4.56815	5.83114	7.43335	9.46345	12.0326	15.2799	16.3648	17.5048	18.7008	19.9532	21.2621	22.1751	23.0957	24.0202	24.9441	25.5249
92	0	0	0	0	0	0	0	0	0	0	0	0	0	0	0	0	0	0	0	6.19312e-05	0.000372641	0.00124563	0.00349749	0.0090184	0.0221054	0.0523913	0.121229	0.275522	0.310112	0.348529	0.391167	0.438462	0.49089	0.548977	0.613298	0.684485	0.763235	0.850308	0.946541	1.00553	1.06741	1.13231	1.20037	1.27173	1.34802	1.42808	1.51208	1.60019	1.67052
96	0	0	0	0	0	0	0	0	0	0	0	0	0	0	0	0	0	0	0	0.0284056	0.0774697	0.140854	0.298781	0.384147	0.465633	0.416889	0.546621	0.675822	0.767186	0.914653	1.08946	1.29659	1.54191	1.83233	2.17603	2.58263	3.06348	3.63196	4.30384	5.0148	5.5326	6.5482	6.94638	7.22883	7.30581	7.71019	7.86567	8.53339	9.97348
100	0	0	0	0	0	0	0	0	0	0	0	0	0	0	0	0	0	0	0	18.4133	66.292	116.915	169.837	227.247	147.322	243.152	418.524	449.464	480.45	519.56	561.021	604.949	651.464	700.689	752.754	807.79	865.933	927.325	992.109	1060.47	1115.39	1195.81	1280.94	1325.2	1369.52	1620.64	1885.96	1822.48	2130.36
104	0	0	0	0	0	0	0	0	0	0	0	0	0	0	0	0	0	0	0	20.982	66.2577	138.035	231.895	288.209	419.057	574.197	745.346	938.577	995.642	1054.21	1114.28	1175.85	1238.92	1303.49	1369.57	1437.14	1506.22	1576.8	1729.97	1889.16	2054.34	2225.54	2402.74	2739.87	3090.52	3454.57	4339.25	5340.95	6571.17
108	0	0	0	0	0	0	0	0	0	0	0	0	0	0	0	0	0	0	0	2.56295	9.1607	18.4402	30.1866	44.3369	60.8262	79.5871	100.186	122.825	129.693	136.155	142.814	149.693	156.811	164.197	171.879	179.894	188.284	197.102	206.408	216.28	226.815	238.134	250.397	263.815	278.678	295.397	314.579	337.173	360.025
112	0	0	0	0	0	0	0	0	0	0	0	0	0	0	0	0	0	0	0	12.0222	37.2973	90.112	182.168	224.363	261.017	388.143	521.878	721.45	877.402	976.576	1085.08	1203.66	1333.05	1474.08	1627.57	1794.37	1975.37	2171.46	2383.51	2612.39	2858.92	3123.86	3407.84	3711.34	4034.61	4377.6	4739.81	5120.17	5444.86
116	0	0	0	0	0	0	0	0	0	0	0	0	0	0	0	0	0	0	0	7.53399	23.3938	42.1336	63.1537	86.2328	111.129	137.575	171.987	208.714	219.034	229.488	240.074	250.789	261.631	272.598	283.687	294.897	306.224	317.667	329.223	340.89	355.693	372.607	390.057	408.057	426.622	464.429	529.65	602.816	675.869
120	0	0	0	0	0	0	0	0	0	0	0	0	0	0	0	0	0	0	0	18.0353	61.9996	118.406	189.945	279.828	391.878	530.644	701.526	910.931	940.325	986.187	1033.3	1081.78	1131.76	1183.39	1236.84	1292.32	1350.08	1410.4	1473.66	1540.27	1610.8	1685.91	1766.5	1853.75	1949.25	2055.24	2175.02	2313.69	2447.42
124	0	0	0	0	0	0	0	0	0	0	0	0	0	0	0	0	0	0	0	0	0	0	0	0	0	0	0	10.2516	13.807	18.5871	25.0133	33.6522	45.266	60.88	81.8737	145.379	202.586	304.063	427.58	603.605	855.505	1219.18	1742.39	2903.33	4122.82	5235.92	6719.4	7551.07	13154.2
132	0	0	0	0	0	0	0	0	0	0	0	0	0	0	0	0	0	0	0	0	0	0	0	0	0	0	1.00899	2.22317	2.46687	2.76693	3.09914	3.46672	3.87317	4.32235	4.81845	5.3661	5.97031	6.63661	7.37101	8.1801	9.07108	10.0518	11.1308	12.3176	13.6223	15.056	16.6311	18.3608	19.9953
136	0	0	0	0	0	0	0	0	0	0	0	0	0	0	0	0	0	0	0	0.0258161	0.0817505	0.1433	0.210049	0.281126	0.354935	0.428694	0.497518	0.552354	0.613537	0.680133	0.752496	0.830982	0.915946	1.00773	1.10665	1.21301	1.32703	1.44889	1.57865	1.63909	1.6978	1.75405	1.80693	1.85532	1.89992	1.93688	1.96375	1.97724	1.94694
140	0	0	0	0	0	0	0	0	0	0	0	0	0	0	0	0	0	0	0	6.852	21.6981	38.1718	56.407	76.5474	98.7471	123.171	149.997	179.414	187.263	197.395	207.924	218.888	230.334	242.314	254.891	268.138	282.144	297.015	312.881	329.903	348.284	368.284	390.241	414.612	442.024	473.375	510.009	554.055	601.208
144	0	0	0	0	0	0	0	0	0	0	0	0	0	0	0	0	0	0	0	5.36373	16.7501	30.5903	46.2437	55.8966	63.2785	77.3747	106.843	138.205	143.735	145.528	147.127	148.54	149.773	150.833	151.726	152.458	153.035	153.463	153.748	153.894	174.953	249.013	354.72	469.951	539.682	550.901	609.693	738.507	823.758
148	0	0	0	0	0	0	0	0	0	0	0	0	0	0	0	0	0	0	0	14.7864	46.8157	84.0953	126.271	178.188	243.288	308.2	415.918	540.044	580.024	607.288	635.182	663.761	693.089	723.238	754.294	786.357	819.543	853.995	889.881	927.409	966.837	1008.49	1052.78	1100.27	1151.7	1208.1	1270.99	1342.71	1408.5
152	0	0	0	0	0	0	0	0	0	0	0	0	0	0	0	0	0	0	0	10.3405	32.1839	57.2442	84.5638	113.507	143.31	173.032	188.869	200.921	212.862	225.141	237.759	250.718	264.016	277.653	291.627	305.936	320.575	335.537	350.817	394.394	442.925	496.924	623.567	794.434	948.071	1115.88	1278.26	1449.13	1665.38
156	0	0	0	0	0	0	0	0	0	0	0	0	0	0	0	0	0	0	0	577.294	1655.04	6872.71	11228.7	11495.9	12848.9	19828.7	25012.3	29642.3	32202.9	35023.2	37079.8	38793	40848.2	42696.1	44682.5	47341	50324.7	53305.5	57274.2	60752.7	63321.7	65377.8	67449.4	69405	71009.9	73061.5	76831.7	80764.9	84216.7
158	0	0	0	0	0	0	0	0	0	0	0	0	0	0	0	0	0	0	0	0.657276	1.9083	3.68045	5.77124	8.0952	10.5457	12.9832	13.8287	70.5168	82.3803	88.8753	95.6991	102.855	110.344	118.165	126.311	134.773	143.535	152.574	161.86	171.351	176.738	183.018	189.014	194.333	198.914	203.013	205.991	230.643	252.471
162	0	0	0	0	0	0	0	0	0	0	0	0	0	0	0	0	0	0	0	0	0	0	0	0	0	0	0	0	0	0	0	0	0	0	0	0	0	0	0	0	0	0	0	0	0	0	0	0	0
166	0	0	0	0	0	0	0	0	0	0	0	0	0	0	0	0	0	0	0	0	0	0	0	0	0	0	0	0	0	0	0	0	0	0	0	0	0	0	0	0	0	0	0	0	0	0	0	0	0
170	0	0	0	0	0	0	0	0	0	0	0	0	0	0	0	0	0	0	0	58.4294	185.271	337.941	508.535	691.396	879.505	2294.12	2007.35	1741.34	1970.8	2217.05	2480.57	2761.87	3061.46	3379.82	3717.45	4074.86	4452.54	4851	4309.2	3778.69	4145.14	4526.91	4860	4893.65	4850.52	5326.4	5592.13	5837.4	6031.44
174	0	0	0	0	0	0	0	0	0	0	0	0	0	0	0	0	0	0	0	0.0622747	0.372909	0.744332	1.21331	1.77922	2.44147	3.19943	4.60509	6.24999	6.46603	7.19285	7.99039	8.86505	9.82375	10.874	12.0241	13.2828	14.6597	16.1654	17.8113	19.6095	21.5735	23.7178	26.058	28.6113	31.3961	34.4324	37.7419	41.3481	44.6859
175	0	0	0	0	0	0	0	0	0	0	0	0	0	0	0	0	0	0	0	0	0	0	0	0	0	0	0	0	0	0	0	0	0	0	0	0	0	0	0	0	0	0	0	0	0	0	0	0	0
178	0	0	0	0	0	0	0	0	0	0	0	0	0	0	0	0	0	0	0	1.79897	6.17102	11.7603	18.8259	27.6765	38.6787	52.2675	68.9588	89.3628	93.409	97.9039	102.516	107.255	112.133	117.166	122.368	127.76	133.364	139.208	145.324	151.752	158.545	165.764	173.493	181.839	190.952	201.036	212.397	225.504	237.991
180	0	0	0	0	0	0	0	0	0	0	0	0	0	0	0	0	0	0	0	35.57	118.453	230.102	367.807	531.489	757.126	1021.61	1251.23	1500	1572.17	1643.01	1715.16	1788.75	1863.91	1940.78	2019.54	2100.39	2183.59	2269.41	2358.21	2450.4	2546.52	2647.21	2753.33	2865.97	2986.64	3117.4	3261.25	3422.81	3562.51
184	0	0	0	0	0	0	0	0	0	0	0	0	0	0	0	0	0	0	0	0.00207572	0.00928674	0.0230803	0.0481785	0.0923494	0.168256	0.296385	0.509665	0.860733	0.941647	1.02864	1.12213	1.22256	1.33038	1.44611	1.57026	1.70341	1.84615	1.99911	2.16298	2.34496	2.5404	2.75022	2.9754	3.217	3.40675	3.60565	3.81408	4.03248	4.20569
188	0	0	0	0	0	0	0	0	0	0	0	0	0	0	0	0	0	0	0	7.13907	22.6537	39.81	58.5384	78.6665	99.8626	121.541	2.32531	6.85906	7.63938	8.49312	9.42605	10.4442	11.5541	12.7622	14.0756	15.5013	17.0466	18.7189	21.1976	23.9553	28.5934	34.5242	40.671	46.9466	59.658	76.6472	93.5155	119.87	146.234
191	0	0	0	0	0	0	0	0	0	0	0	0	0	0	0	0	0	0	0	10.9558	32.3331	54.9935	78.0133	100.831	122.736	142.782	186.796	192.122	201.926	215.677	229.947	244.732	260.027	275.818	292.088	308.814	325.965	343.499	361.368	386.721	413.104	440.448	468.648	497.559	550.589	607.641	668.574	733.046	789.974
192	0	0	0	0	0	0	0	0	0	0	0	0	0	0	0	0	0	0	0	0.138598	0.512325	1.05143	1.81129	2.86333	4.2992	6.23577	8.82117	12.242	14.7637	17.7782	21.3785	25.6749	30.7975	36.9007	44.1667	52.8109	63.0881	75.299	89.7985	107.006	137.561	176.067	225.199	244.363	264.116	288.64	315.688	345.087	456.699
196	0	0	0	0	0	0	0	0	0	0	0	0	0	0	0	0	0	0	0	4.16528	10.1361	15.9358	23.7652	33.6489	28.7378	41.9638	26.7533	25.4059	26.1738	26.9225	27.6522	28.3628	29.0543	29.7267	30.3799	31.0141	31.6292	32.2252	35.1876	38.2121	41.2945	44.4305	47.616	53.7098	59.9195	66.2364	72.6516	79.1563	90.9551
203	0	0	0	0	0	0	0	0	0	0	0	0	0	0	0	0	0	0	0	21.7505	70.328	136.022	244.625	452.4	439.19	588.887	952.747	992.133	1050.02	1108.5	1167.47	1226.8	1286.36	1346	1405.57	1464.92	1523.88	1582.25	1639.84	1696.44	2010.39	2328.14	2463.51	2668.03	2892.83	3106.34	3290.12	3548.9	3796.21
204	0	0	0	0	0	0	0	0	0	0	0	0	0	0	0	0	0	0	0	18.4794	63.2797	120.383	192.374	282.319	387.702	508.463	605.479	658.07	631.667	605.427	579.48	553.938	528.892	504.417	480.575	457.412	434.965	413.263	392.323	377.971	363.878	350.068	336.561	323.373	337.977	353.041	368.576	384.597	395.883
208	0	0	0	0	0	0	0	0	0	0	0	0	0	0	0	0	0	0	0	9.86943	31.0807	59.897	95.193	135.734	109.413	191.818	255.291	326.834	346.052	366.124	387.04	408.881	431.736	462.775	487.509	512.83	538.737	565.226	625.685	688.495	778.413	850.595	962.542	1114.93	1269.89	1431.31	1612.57	1838.96	2089.82
212	0	0	0	0	0	0	0	0	0	0	0	0	0	0	0	0	0	0	0	0.00943219	0.0342482	0.0688476	0.115759	0.177774	0.257668	0.357562	0.477458	0.611762	0.733467	0.877695	1.04834	1.24992	1.48767	1.76759	2.0966	2.48263	2.93468	3.46299	4.07907	4.79576	5.62731	6.58922	7.53251	8.9851	9.77862	9.96202	7.00333	9.69143	11.1802
214	0	0	0	0	0	0	0	0	0	0	0	0	0	0	0	0	0	0	0	0.502555	1.86941	3.86248	6.70217	10.6779	16.1681	23.666	13.2499	15.4907	16.765	18.1172	19.5516	21.0726	22.6848	24.3931	26.2028	28.1191	30.1478	32.2947	34.5662	38.0251	41.7994	45.9163	50.4055	55.2987	74.2726	99.6999	134.451	180.066	229.143
218	0	0	0	0	0	0	0	0	0	0	0	0	0	0	0	0	0	0	0	9.84114	32.8776	58.6046	86.7987	116.878	148.155	179.803	164.678	176.062	181.98	187.796	193.507	199.112	204.608	209.993	215.263	220.417	225.45	230.361	235.145	239.799	305.243	355.068	412.668	469.918	528.463	612.296	682.681	760.553	877.377
222	0	0	0	0	0	0	0	0	0	0	0	0	0	0	0	0	0	0	0	1.43534	4.54765	7.97678	11.7021	15.6787	19.8238	23.9929	27.9337	31.1848	32.3976	33.692	35.1128	36.7253	38.6239	40.9466	43.8948	52.3347	60.9035	69.5571	78.2473	86.9204	101.214	115.396	129.348	151.282	172.609	204.969	235.833	264.642	326.375
226	0	0	0	0	0	0	0	0	0	0	0	0	0	0	0	0	0	0	0	1.59081	5.21242	8.5315	11.7176	22.1439	30.8999	40.7807	48.7682	56.9709	59.3808	61.7993	64.2434	66.717	69.2244	71.771	74.3631	77.0084	79.7166	82.4996	85.373	88.3568	91.4781	94.7744	98.2997	102.136	106.416	111.378	117.508	126.082	140.859
231	0	0	0	0	0	0	0	0	0	0	0	0	0	0	0	0	0	0	0	33.6129	100.81	167.968	235.088	302.169	369.211	436.215	503.18	570.106	605.818	642.522	680.218	718.907	758.587	799.259	840.923	883.578	927.225	971.863	1017.49	1064.11	1530.35	2019.59	2531.83	3067.06	3625.29	4206.5	4810.71	5437.9	6008.67
232	0	0	0	0	0	0	0	0	0	0	0	0	0	0	0	0	0	0	0	0.672546	2.11895	4.05194	6.39771	9.67929	13.5983	18.15	23.5037	29.5259	31.2464	33.097	35.04	37.0853	39.2447	41.5318	43.963	46.5574	49.3386	52.3349	55.5816	59.1225	63.0138	67.3279	72.1613	77.6445	83.9612	91.3783	100.304	111.399	124.19
233	0	0	0	0	0	0	0	0	0	0	0	0	0	0	0	0	0	0	0	3.06131	9.36833	15.8754	22.5068	29.1546	35.6634	41.8041	47.2259	51.352	61.634	73.8383	88.3033	105.423	125.655	149.532	177.666	210.768	249.652	295.255	348.643	402.642	464.244	534.361	613.969	704.099	733.29	761.992	789.872	816.509	830.402
234	0	0	0	0	0	0	0	0	0	0	0	0	0	0	0	0	0	0	0	0.000967199	0.00287028	0.00471709	0.00648632	0.00815064	0.00967395	0.0110066	0.0120762	0.0127686	0.0164267	0.0210945	0.0270417	0.0346081	0.0442207	0.0564154	0.0718638	0.0914059	0.11609	0.147224	0.18643	0.235724	0.297596	0.375115	0.472052	0.593014	0.743607	0.930606	1.16213	1.44782	1.77548
238	0	0	0	0	0	0	0	0	0	0	0	0	0	0	0	0	0	0	0	0	0	0	0	0	0	0	0	0	0	0	0	0	0	0	0	0	0	0	0	0	0	0	0	0	0	0	0	0	0
242	0	0	0	0	0	0	0	0	0	0	0	0	0	0	0	0	0	0	0	0.199835	0.649594	1.17071	1.76804	2.4451	3.20322	4.04003	4.94729	5.90708	6.42918	6.98634	7.58056	8.21392	8.88859	9.60684	10.371	11.1836	12.0472	12.9644	13.938	15.0125	16.1555	17.3705	18.6613	20.032	21.0574	22.1184	23.5422	24.9855	32.8965
246	0	0	0	0	0	0	0	0	0	0	0	0	0	0	0	0	0	0	0	1.92182	6.61103	12.2163	18.5497	25.4142	26.7316	29.8116	64.6875	137.353	155.139	174.959	197.032	221.596	248.914	279.275	312.998	350.432	391.963	438.014	521.572	618.68	780.363	894.007	1087.41	1231.02	1414.01	1519.28	1725.1	1933.52	2148.16
250	0	0	0	0	0	0	0	0	0	0	0	0	0	0	0	0	0	0	0	205.997	685.279	1333.01	2468.46	4711.79	3846.99	5977.1	8139.39	10400.6	11027.9	11665.5	12312.4	12967.6	13629.8	14298	14970.8	15646.8	16324.3	17001.7	18390.9	19669.8	20703.8	21808.2	22894	23108.3	23229.4	23685.5	23772.1	23421.9	22847.6
254	0	0	0	0	0	0	0	0	0	0	0	0	0	0	0	0	0	0	0	0.0239236	0.0757544	0.132783	0.194621	0.260455	0.3288	0.397064	0.460697	0.51125	0.583139	0.663803	0.754155	0.855178	0.96792	1.09349	1.23305	1.38779	1.55893	1.74767	1.95515	2.18237	2.43015	2.69893	2.98866	3.29848	3.62637	3.96855	4.3186	4.66599	4.92842
258	0	0	0	0	0	0	0	0	0	0	0	0	0	0	0	0	0	0	0	0.0108108	0.0471295	0.113764	0.229723	0.423788	0.73812	1.23154	1.97923	3.05832	3.31062	3.57704	3.85797	4.15378	4.46477	4.79119	5.13318	5.4908	5.86395	6.25238	6.65562	7.09261	7.54513	8.01186	8.49099	8.98008	9.2867	9.57981	9.85449	10.1046	10.1877
262	0	0	0	0	0	0	0	0	0	0	0	0	0	0	0	0	0	0	0	0	0	0	0	0	0	0	0	0	0	0	0	0	0	0	0	0	0	0	2.29257	2.34121	2.38813	2.43316	2.47608	2.51662	2.55445	2.58921	2.62041	2.64755	2.63524
266	0	0	0	0	0	0	0	0	0	0	0	0	0	0	0	0	0	0	0	0.635649	2.16232	4.08571	6.48348	9.44657	13.0813	17.5117	22.8821	29.3603	31.1281	32.5932	34.094	35.6339	37.217	38.8476	40.5311	42.2737	44.0826	45.9667	47.9367	50.0055	52.1894	54.509	56.9909	59.6702	62.5944	65.8308	69.4775	73.6867	77.6845
268	0	0	0	0	0	0	0	0	0	0	0	0	0	0	0	0	0	0	0	14.1396	43.2342	104.205	186.687	286.549	265.074	367.174	468.327	556.412	363.607	403.584	447.089	494.346	545.58	601.011	660.846	725.275	794.457	868.511	947.493	1031.38	1120.02	1213.13	1310.19	1410.4	1512.53	1614.8	1714.56	1807.93	1864.39
270	0	0	0	0	0	0	0	0	0	0	0	0	0	0	0	0	0	0	0	0.0173838	0.059412	0.112802	0.179898	0.263474	0.366809	0.493775	0.648933	0.837657	0.786314	0.737026	0.68988	0.644925	0.602183	0.561649	0.523297	0.487089	0.452969	0.420874	0.390735	0.602173	0.92735	1.42713	2.19482	3.37337	5.18165	7.95476	12.2054	18.7176	28.316
275	0	0	0	0	0	0	0	0	0	0	0	0	0	0	0	0	0	0	0	2.31071	6.30474	9.50152	11.9465	13.6833	14.7536	15.1976	15.0536	14.3585	16.3217	18.5208	20.9814	23.7317	26.8024	30.2273	34.0433	38.2906	43.0132	48.2588	52.148	56.2851	60.681	65.347	70.2943	75.5337	76.4352	77.2644	78.0189	78.6961	78.2595
276	0	0	0	0	0	0	0	0	0	0	0	0	0	0	0	0	0	0	0	94.8937	355.851	948.937	2158.83	3416.17	2218.14	3392.45	4270.22	4436.28	4565.6	4691.22	4813.14	4931.36	6775.41	7014.19	7253.8	7494.25	7735.54	8469.26	8727.19	8986	9245.7	9506.28	11615	11914.8	12215	12515.7	12816.8	14518.7	14631.2
288	0	0	0	0	0	0	0	0	0	0	0	0	0	0	0	0	0	0	0	11.0341	37.8218	72.024	115.21	169.247	236.351	319.149	420.752	544.84	571.19	598.128	625.707	653.983	683.022	712.902	743.709	775.548	808.542	842.838	878.612	916.083	955.519	997.261	1041.75	1089.56	1141.47	1198.58	1262.5	1335.68	1403.67
292	0	0	0	0	0	0	0	0	0	0	0	0	0	0	0	0	0	0	0	0	0	0	0	0	0	0	0	0	0	0	0	0	0	0	0	0	0	0	0	0	0	0	0	0	0	0	0	0	0
296	0	0	0	0	0	0	0	0	0	0	0	0	0	0	0	0	0	0	0	0	0	0	1.21775	1.74439	2.37534	3.12751	4.02031	5.07599	5.55834	6.07751	6.63606	7.2367	7.88232	8.57599	9.32101	10.1208	10.9792	11.9001	12.8877	13.9852	15.1651	16.4331	17.7954	19.2587	20.414	21.6263	22.8983	24.2325	25.2975
300	0	0	0	0	0	0	0	0	0	0	0	0	0	0	0	0	0	0	0	12.4024	39.1655	70.4978	106.922	146.87	129.246	169.717	293.741	332.906	361.841	391.977	423.315	455.854	489.594	524.536	560.68	598.024	636.57	676.318	717.267	759.417	854.833	961.46	1080.92	1214.23	1363.53	1545.64	1750.71	1982.26	2144.17
304	0	0	0	0	0	0	0	0	0	0	0	0	0	0	0	0	0	0	0	0	0	0	0	0	0	0	0	0	0	0	0	0	0	0	0	0	0	0	0	0	0	0	0	0	0	0	0	0	0
308	0	0	0	0	0	0	0	0	0	0	0	0	0	0	0	0	0	0	0	0.090719	0.291964	0.521556	0.78185	1.07518	1.40381	1.76979	2.17486	2.62025	2.94047	3.29487	3.68684	4.12009	4.59866	5.127	5.70995	6.35282	7.06141	7.84204	8.70164	9.2141	9.74936	10.3083	10.8918	11.5008	12.1498	12.8277	13.5358	14.2752	14.8507
312	0	0	0	0	0	0	0	0	0	0	0	0	0	0	0	0	0	0	0	0.225911	0.722122	1.28006	1.90206	2.58917	3.34058	4.15259	5.01723	5.92001	6.62789	7.40886	8.26984	9.21833	10.2625	11.4113	12.6742	14.0619	15.5857	17.2579	19.092	20.1538	21.2568	22.402	23.5904	24.8233	26.1307	27.4877	28.8953	30.3549	31.4518
316	0	0	0	0	0	0	0	0	0	0	0	0	0	0	0	0	0	0	0	0.0226777	0.0826553	0.166922	0.282257	0.436593	0.638788	0.897908	1.22155	1.61208	1.75075	1.89816	2.05474	2.22091	2.39712	2.58381	2.78144	2.99045	3.21129	3.44443	3.69028	3.96025	4.24531	4.54595	4.86265	5.19581	5.43508	5.67917	5.92762	6.17991	6.35146
320	0	0	0	0	0	0	0	0	0	0	0	0	0	0	0	0	0	0	0	12.0547	46.7612	80.3675	115.132	150.224	184.61	216.947	175.275	212.439	215.792	218.805	221.482	223.827	225.843	227.531	228.893	229.931	230.645	231.034	231.098	230.833	263.415	299.157	339.233	387.584	435.812	474.827	500.33	526.114	573.661
324	0	0	0	0	0	0	0	0	0	0	0	0	0	0	0	0	0	0	0	4.28764	14.6248	27.7111	44.1021	64.4532	89.5358	120.257	157.68	203.054	212.755	222.664	232.8	243.183	253.838	264.793	276.079	287.735	299.806	312.345	325.417	339.101	353.496	368.727	384.955	402.389	421.319	442.144	465.452	492.147	516.897
328	0	0	0	0	0	0	0	0	0	0	0	0	0	0	0	0	0	0	0	1.15264	4.22081	7.54247	11.2042	16.3052	22.0298	28.226	31.241	37.4231	40.5639	43.8997	47.4406	51.1974	55.181	59.403	63.8755	68.6109	73.6221	78.9228	84.5267	90.8812	97.6305	104.796	112.398	120.461	132.771	146.234	160.952	177.032	192.052
332	0	0	0	0	0	0	0	0	0	0	0	0	0	0	0	0	0	0	0	0.465751	2.03036	4.90081	9.89567	18.2541	31.7908	53.0358	11.2907	14.5343	18.6825	23.9698	30.6981	39.247	50.0923	63.8296	81.2026	103.139	130.79	165.586	209.295	264.095	300.763	324.126	348.622	388.703	427.942	454.68	509.95	570.075	644.026
334	0	0	0	0	0	0	0	0	0	0	0	0	0	0	0	0	0	0	0	0	0	0	0	0	0	0	0	0	0	0	0	0	0	0	0	0	0	0	0	0	0	0	0	0	0	0	0	0	0
336	0	0	0	0	0	0	0	0	0	0	0	0	0	0	0	0	0	0	0	0	0	0	0	0	0	0	0	0	0	0	0	0	0	0	0	0	0	0	0	0	0	0	0	0	0	0	0	0	0
340	0	0	0	0	0	0	0	0	0	0	0	0	0	0	0	0	0	0	0	8.70065	31.9728	65.188	111.477	174.772	259.956	373.002	119.105	37.2297	39.9043	42.706	45.6397	48.7105	51.9238	55.285	58.7997	62.4737	66.3129	70.3237	74.5122	78.8849	153.652	183.173	218.209	247.897	272.232	298.767	327.69	359.203	388.392
0	0	0	0	0	0	0	0	0	0	0	0	0	0	0	0	0	0	0	0	0	0	0	0	0	0	0	0	0	0	0	0	0	0	0	0	0	0	0	0	0	0	0	0	0	0	0	0	0	0
348	0	0	0	0	0	0	0	0	0	0	0	0	0	0	0	0	0	0	0	11.2394	41.0664	79.8501	144.534	280.672	264.261	374.1	411.067	527.926	604.48	684.468	767.78	854.305	943.924	1036.52	1131.96	1230.13	1330.88	1434.09	1539.6	1647.27	1896.19	2151.9	2327.17	2474.96	2652.79	2890.08	3160.51	3538.12	3850.41
352	0	0	0	0	0	0	0	0	0	0	0	0	0	0	0	0	0	0	0	0.0988421	0.574109	1.29226	1.73765	2.13393	2.11966	2.35123	2.09049	2.11898	2.22138	2.3242	2.42722	2.5302	2.63285	2.73486	2.83587	2.93546	3.03317	3.12845	3.22067	3.37806	3.53579	3.69265	3.84714	3.99737	4.01547	4.01973	4.00768	3.97617	3.86986
356	0	0	0	0	0	0	0	0	0	0	0	0	0	0	0	0	0	0	0	1544.55	4357.67	6822.62	8963.44	10804.1	12368.4	13679.2	14758.8	18585.1	20783.3	23207.2	25878.2	28819.8	32057.6	35619.6	39536.1	43840.5	48568.8	53760.5	59458.6	65710	72565.5	80080.8	88316.3	91828.1	95422.8	99153	102957	106829	109325
360	0	0	0	0	0	0	0	0	0	0	0	0	0	0	0	0	0	0	0	22.2154	77.6762	159.828	273.483	426.207	737.969	1116.06	1461.08	1898.16	2035.58	2179.48	2330.1	2487.7	2652.53	2936.73	3240.63	3565.11	3911.06	4279.44	4426.86	4562.96	4687.89	4801.84	4905.04	6105.02	7240.77	8312.77	9321.74	11391.9	13368
364	0	0	0	0	0	0	0	0	0	0	0	0	0	0	0	0	0	0	0	122.938	375.912	643.636	922.445	806.737	1025.72	1254.29	1753.21	1923.65	2078.34	2196.62	2318.43	2443.85	2572.96	2705.85	2842.61	2983.33	3128.11	3277.04	3430.21	3587.74	3879.75	4180.57	4490.07	4808.14	5134.68	6041.36	6978.78	7750.52	8433.46
368	0	0	0	0	0	0	0	0	0	0	0	0	0	0	0	0	0	0	0	61.9974	160.167	226.052	240.38	217.031	255.8	291.13	403.775	351.47	364.07	376.557	388.931	401.193	413.342	425.377	437.3	449.11	460.806	472.389	509.239	548.53	590.409	635.033	682.568	733.188	854.541	995.396	1158.82	1348.34	1547.61
372	0	0	0	0	0	0	0	0	0	0	0	0	0	0	0	0	0	0	0	7.24006	22.0356	46.9789	94.0912	152.631	130.944	189.948	306.677	588.769	732.064	767.904	802.916	836.657	868.573	874.234	875.702	975.885	1150.23	1213.08	1346.28	1505.51	1522.58	1705.17	1186.29	1093.61	1104.45	941.541	866.468	832.454	817.2
376	0	0	0	0	0	0	0	0	0	0	0	0	0	0	0	0	0	0	0	5.47084	13.8724	22.0864	29.3099	35.4033	28.3953	37.406	37.9205	29.6301	33.0308	36.5102	40.0581	43.6644	47.3188	51.0111	54.7312	58.4689	62.214	65.9563	69.2734	73.3916	77.6672	82.1013	86.6943	91.4463	93.5268	95.5539	97.5225	99.4275	99.9422
380	0	0	0	0	0	0	0	0	0	0	0	0	0	0	0	0	0	0	0	144.695	483.578	971.24	1714.2	3124.63	2356.3	3020.2	4954.64	5498.25	5682.2	5884.8	6086.27	6286.6	6485.81	6683.89	6880.86	7076.71	7271.45	7465.09	7657.63	7849.08	8286.44	8742.27	9217.29	9711.73	9819.5	10284.5	10854	11382.2	11839.2
384	0	0	0	0	0	0	0	0	0	0	0	0	0	0	0	0	0	0	0	9.85418	33.8596	64.6345	103.638	152.611	213.625	289.143	382.089	495.93	519.385	543.299	567.71	592.66	618.199	644.383	671.278	698.962	727.524	757.073	787.74	819.683	853.101	888.241	925.422	965.063	1007.73	1054.2	1105.63	1163.78	1215.44
388	0	0	0	0	0	0	0	0	0	0	0	0	0	0	0	0	0	0	0	0.0328299	0.192632	0.62693	1.71075	4.2779	10.1431	23.1835	12.8851	7.00108	8.45642	10.1985	12.2819	14.7711	17.7424	21.2862	25.5095	30.5386	36.5228	43.6386	52.0939	54.6974	57.3842	60.156	63.0145	65.9612	76.1399	87.8306	101.251	0	21.3805
392	0	0	0	0	0	0	0	0	0	0	0	0	0	0	0	0	0	0	0	28.2353	84.7059	145.882	165.093	232.57	345.941	512.8	767.795	1264.29	1415.49	1456.57	1496.4	1534.94	1572.15	1596.88	1619.72	1640.62	1659.58	1676.55	1752.35	1827.91	1903.01	1977.4	2050.81	2147.11	2242.25	2420.37	2650.98	2974.9	3312.61
398	0	0	0	0	0	0	0	0	0	0	0	0	0	0	0	0	0	0	0	0.374378	1.40392	2.92483	5.11845	8.22608	12.5676	18.5658	26.7776	37.9349	49.3154	64.0152	82.9827	107.433	138.922	179.441	231.536	298.465	384.387	494.615	635.934	816.998	1048.85	1345.56	1725.08	2210.26	2830.21	3622	4632.79	5922.6	7469.05
400	0	0	0	0	0	0	0	0	0	0	0	0	0	0	0	0	0	0	0	2.24603	5.79687	9.37099	12.6639	15.6337	12.8853	17.7208	18.7397	15.3094	16.1379	16.6222	17.0956	17.5583	18.0101	18.4509	18.8807	19.2994	19.707	20.1032	20.4882	20.8618	22.2963	23.8097	25.4057	27.088	28.8604	36.4881	46.1	58.2048	72.4824
404	0	0	0	0	0	0	0	0	0	0	0	0	0	0	0	0	0	0	0	9.94314	34.0793	66.7163	107.278	155.756	212.142	276.429	371.99	481.653	512.886	538.655	565.221	592.661	621.062	650.525	681.166	713.126	746.568	781.691	818.735	857.996	899.845	944.75	993.324	1046.37	1105.01	1170.8	1246.04	1334.37	1423.03
408	0	0	0	0	0	0	0	0	0	0	0	0	0	0	0	0	0	0	0	14.013	45.2667	87.4497	157.046	144.952	196.534	250.142	335.611	433.449	489.817	529.466	571.317	615.432	661.869	710.676	761.889	815.533	871.616	930.123	991.017	1054.23	1082.38	1095.69	1107.2	1116.73	1124.05	1128.34	1136.19	1140.96	1127.28
410	0	0	0	0	0	0	0	0	0	0	0	0	0	0	0	0	0	0	0	24.5705	79.2487	152.811	273.776	251.924	340.177	430.475	572.528	728.519	822.447	902.875	989.251	1081.84	1180.9	1286.66	1399.29	1518.94	1645.67	1779.44	1920.11	2067.36	2097.28	2101.39	2099.49	2109.37	2111.14	2091.27	2060.4	2016.29	1959.48
414	0	0	0	0	0	0	0	0	0	0	0	0	0	0	0	0	0	0	0	0	0	0	0	0	0	0	0	0	0	0	0	0	0	0	0	0	0	0	44.252	44.8961	45.4389	45.8655	46.1583	46.2957	46.2507	45.9888	45.4643	44.6148	42.7852
417	0	0	0	0	0	0	0	0	0	0	0	0	0	0	0	0	0	0	0	7.30237	22.3769	39.4481	58.0147	77.8587	98.7358	120.369	153.991	189.901	207.884	227.062	247.66	269.772	293.496	318.939	346.213	375.435	406.733	440.238	476.093	514.446	555.455	599.29	646.125	696.149	749.56	806.567	867.391	932.267	988.379
418	0	0	0	0	0	0	0	0	0	0	0	0	0	0	0	0	0	0	0	0.921771	3.17483	5.97366	9.31804	13.2079	17.6431	22.6237	32.6239	44.3609	46.9035	49.5052	52.166	54.8859	57.6648	60.5028	63.3999	66.356	69.3712	72.4455	83.0303	94.088	105.618	117.622	130.098	143.047	156.468	170.225	195.597	223.21	230.075
422	0	0	0	0	0	0	0	0	0	0	0	0	0	0	0	0	0	0	0	12.1831	33.1559	56.2592	79.6037	102.586	94.9006	112.598	139.93	122.01	118.875	119.416	119.729	119.817	119.682	119.328	118.755	117.965	116.958	115.731	114.282	112.604	122.838	131.628	140.648	149.807	158.973	187.154	185.437	201.011	193.567
426	0	0	0	0	0	0	0	0	0	0	0	0	0	0	0	0	0	0	0	0	0	0	0	0	0	0	0	0	0	0	0	0	0	0	0	0	0	0	37.3083	40.3557	43.7973	47.7259	52.2671	57.596	63.9654	71.7553	81.5678	94.4227	110.75
428	0	0	0	0	0	0	0	0	0	0	0	0	0	0	0	0	0	0	0	4.16233	12.7232	21.5304	30.4707	39.382	48.0291	56.0611	62.9285	67.6941	81.1268	97.0349	115.844	138.045	164.206	194.98	231.112	273.455	322.974	380.758	448.023	515.381	591.607	677.556	774.056	881.851	973.693	1071.22	1173.49	1278.87	1366.61
430	0	0	0	0	0	0	0	0	0	0	0	0	0	0	0	0	0	0	0	3.55629	11.2384	19.7307	29.0975	39.4082	50.7367	63.1622	76.7695	91.6494	96.1878	100.84	105.615	110.525	115.583	120.803	126.203	131.804	137.629	143.708	150.075	156.774	163.859	171.396	179.475	188.209	197.757	208.339	220.28	234.08	247.306
434	0	0	0	0	0	0	0	0	0	0	0	0	0	0	0	0	0	0	0	19.0169	58.8011	69.2849	55.9749	109.006	179.359	267.501	311.585	356.451	345.204	361.257	377.521	393.996	410.682	427.579	444.69	462.013	479.549	497.3	515.265	573.986	595.273	616.873	638.788	661.019	683.565	706.428	766.149	894.79	939.676
438	0	0	0	0	0	0	0	0	0	0	0	0	0	0	0	0	0	0	0	0.163979	0.485997	0.797432	1.09435	1.37165	1.62248	1.83724	2.00151	2.09137	2.20402	2.31825	2.43387	2.55064	2.6683	2.78656	2.90503	3.02333	3.14096	3.25736	3.37189	3.48378	3.59212	3.69586	3.79372	3.88417	3.96537	4.03501	4.09023	4.12735	4.08753
440	0	0	0	0	0	0	0	0	0	0	0	0	0	0	0	0	0	0	0	5.06055	15.5373	26.4334	37.6576	49.0799	60.5162	71.703	82.2562	91.5942	110.277	132.549	159.07	190.616	228.098	272.585	325.332	387.811	461.742	549.137	652.348	758.317	880.56	1021.44	1183.62	1370.13	1540.39	1729.99	1940.9	2175.18	2403.31
442	0	0	0	0	0	0	0	0	0	0	0	0	0	0	0	0	0	0	0	1.44321	4.27667	7.01591	9.62596	12.0614	14.2612	16.1395	17.5668	18.3273	19.9034	21.573	23.3386	25.2027	27.1671	29.233	31.4009	33.6701	36.039	38.504	41.0599	46.0882	51.6237	57.6939	64.3195	71.511	71.8095	75.7453	79.2707	82.2726	83.5006
446	0	0	0	0	0	0	0	0	0	0	0	0	0	0	0	0	0	0	0	0	0	0	0	0	0	0	0	0	0	0	0	0	0	0	0	0	0	0	0	0	0	0	0	0	0	0	0	0	0
450	0	0	0	0	0	0	0	0	0	0	0	0	0	0	0	0	0	0	0	1.8912	7.55119	17.797	32.1853	50.6931	73.2971	113.484	158.706	211.213	223.788	235.671	247.998	260.814	274.17	288.125	302.749	318.124	334.35	351.546	369.856	389.461	410.586	433.522	458.647	486.467	517.68	553.281	594.759	644.466	697.202
454	0	0	0	0	0	0	0	0	0	0	0	0	0	0	0	0	0	0	0	1.81979	6.25635	12.4749	20.3135	29.7565	40.7881	53.3922	66.6313	81.1712	85.7298	90.6991	95.9044	101.371	107.128	113.211	119.659	126.521	133.856	141.735	150.244	159.494	169.623	180.81	193.293	207.394	223.561	242.446	265.042	292.948	324.676
458	0	0	0	0	0	0	0	0	0	0	0	0	0	0	0	0	0	0	0	1.76763	5.58191	11.1265	18.1297	26.5914	36.5118	47.8907	69.0728	93.9386	101.084	108.49	116.157	124.085	132.273	140.722	149.431	158.401	167.631	177.123	191.292	205.968	221.15	236.838	253.032	337.165	425.093	516.806	810.031	921.774	1188.28
462	0	0	0	0	0	0	0	0	0	0	0	0	0	0	0	0	0	0	0	0.00287178	0.0125057	0.0301465	0.0607718	0.111866	0.194268	0.322792	0.5155	0.788023	0.824143	0.860208	0.896126	0.931797	0.967106	1.00192	1.0361	1.06948	1.10185	1.13301	1.16269	1.23048	1.29925	1.36845	1.43737	1.50511	1.65769	1.81814	1.98411	2.15168	2.2843
466	0	0	0	0	0	0	0	0	0	0	0	0	0	0	0	0	0	0	0	7.1073	22.3158	39.75	59.1801	81.979	110.646	140.732	188.24	242.231	256.213	268.861	281.882	295.313	309.195	323.576	338.513	354.071	370.329	387.382	405.343	424.355	444.593	466.281	489.711	515.267	543.478	575.089	611.199	653.527	695.759
470	0	0	0	0	0	0	0	0	0	0	0	0	0	0	0	0	0	0	0	0.0585816	0.214804	0.349491	0.476755	1.19193	0.706353	1.61398	3.58679	6.81778	7.25986	7.71273	8.1761	8.64968	9.13317	9.86105	10.611	11.3824	12.1746	12.9871	14.0849	15.2136	16.3722	21.3002	21.4948	22.4888	23.232	23.7049	23.8881	23.7619	24.415
474	0	0	0	0	0	0	0	0	0	0	0	0	0	0	0	0	0	0	0	0.00930725	0.0540968	0.174098	0.4687	1.15274	2.67662	5.95334	3.18827	1.64136	1.96912	2.3579	2.81835	3.36289	4.00589	4.76399	5.65636	6.7051	7.9355	9.37643	11.0607	11.5496	12.0388	12.5256	13.0064	13.4771	14.4303	15.4116	16.4122	17.4204	18.1789
478	0	0	0	0	0	0	0	0	0	0	0	0	0	0	0	0	0	0	0	1.64335	5.15556	9.17538	13.6481	19.3813	25.6581	32.3609	43.2395	55.5805	58.3888	60.9943	63.6471	66.3516	69.1127	71.9363	74.8289	77.7983	80.8539	84.0064	87.2693	90.6586	94.1943	97.9016	101.813	105.97	110.431	115.275	120.618	126.637	131.879
480	0	0	0	0	0	0	0	0	0	0	0	0	0	0	0	0	0	0	0	0.00892095	0.0347587	0.0750699	0.135828	0.224972	0.352819	0.532359	0.77917	1.11032	1.4341	1.84931	2.38115	3.06161	3.93127	5.04159	6.45775	8.26227	10.5595	13.4813	17.1943	21.9087	27.8895	29.4587	29.6644	37.8947	39.6174	45.479	47.6591	48.4762	48.2884
484	0	0	0	0	0	0	0	0	0	0	0	0	0	0	0	0	0	0	0	159.427	552.476	1064.82	1700.07	2465.09	3367.04	4413.36	207.843	961.414	1105.86	1262.51	1431.95	1614.76	1811.56	2023.01	2249.75	2492.48	2751.91	3028.77	3323.84	3637.9	3971.77	4326.3	4702.37	5100.89	5522.79	5967.22	7504.19	9249.88	10750.2
492	0	0	0	0	0	0	0	0	0	0	0	0	0	0	0	0	0	0	0	0	0	0	0	0	0	0	0	0	0	0	0	0	0	0	0	0	0	0	0	0	0	0	0	0	0	0	0	0	0
496	0	0	0	0	0	0	0	0	0	0	0	0	0	0	0	0	0	0	0	12.8855	39.8684	85.5263	145.909	197.349	168.576	197.254	225.347	252.865	258.934	267.121	275.189	283.139	290.972	298.69	306.293	313.784	321.162	328.429	335.587	342.636	351.546	363.28	375.158	387.183	399.355	415.694	463.264	516.012	566.989
498	0	0	0	0	0	0	0	0	0	0	0	0	0	0	0	0	0	0	0	6.4928	20.1367	48.6323	98.266	120.953	140.598	208.84	280.328	386.484	262.188	291.71	323.987	359.23	397.659	439.501	484.993	534.377	587.894	645.789	708.299	775.647	848.04	925.651	1008.61	1096.98	1190.75	1289.76	1393.72	1502.11	1593.03
500	0	0	0	0	0	0	0	0	0	0	0	0	0	0	0	0	0	0	0	0.000163878	0.000977703	0.00324025	0.00901958	0.0230549	0.0560144	0.131579	0.301731	0.679533	0.764144	0.858019	0.962102	1.07743	1.20516	1.34652	1.50289	1.67579	1.86686	2.07791	2.31093	2.45266	2.60118	2.75678	2.91976	3.09044	3.27278	3.46391	3.66422	3.8741	4.04058
504	0	0	0	0	0	0	0	0	0	0	0	0	0	0	0	0	0	0	0	50.2911	157.7	241.131	308.462	426.563	449.043	424.669	704.592	594.277	642.771	692.908	744.659	797.996	852.889	909.309	967.229	1026.62	1087.45	1149.69	1213.32	1278.31	1540.72	1812.83	2094.45	2385.41	2685.53	2994.63	3312.53	3639.06	3922.2
508	0	0	0	0	0	0	0	0	0	0	0	0	0	0	0	0	0	0	0	2.47503	9.6387	23.4472	43.0584	68.3812	99.3231	135.789	194.828	263.562	283.028	303.171	323.989	345.481	367.645	390.481	413.987	438.163	463.006	488.517	514.693	541.533	569.371	648.927	739.113	841.305	915.185	994.987	1081.16	1174.19	1257.97
512	0	0	0	0	0	0	0	0	0	0	0	0	0	0	0	0	0	0	0	0	0	0	0	0	0	0	0	0	0	0	0	0	0	0	0	0	0	0	105.136	106.951	110.141	113.309	116.223	118.81	120.979	122.436	126.162	129.054	129.023
516	0	0	0	0	0	0	0	0	0	0	0	0	0	0	0	0	0	0	0	0	0	0	0	0	0	0	0	0	0	0	0	0	0	0	0	0	0	0	190.228	204.879	220.536	237.268	255.147	274.25	294.662	316.469	339.766	364.656	386.141
520	0	0	0	0	0	0	0	0	0	0	0	0	0	0	0	0	0	0	0	0	0	0	0	0	0	0	0	0	0	0	0	0	0	0	0	0	0	0	0	0	0	0	0	0	0	0	0	0	0
524	0	0	0	0	0	0	0	0	0	0	0	0	0	0	0	0	0	0	0	11.1043	31.3287	50.6323	68.4686	84.7358	99.3815	112.393	147.369	182.201	204.2	228.495	255.306	284.874	317.463	353.361	392.88	436.364	484.185	536.75	594.503	670.765	726.536	850.945	893.287	918.235	944.223	1027.9	1030.77	1069.64	1256.9
528	0	0	0	0	0	0	0	0	0	0	0	0	0	0	0	0	0	0	0	2.12434	7.01032	14.0206	22.0825	50.2317	43.853	78.3631	121.038	171.879	181.674	191.693	201.937	212.405	223.099	234.016	245.159	256.526	268.117	279.933	291.974	304.239	344.404	388.191	429.334	474.144	523.309	589.785	662.117	753.388	773.735
530	0	0	0	0	0	0	0	0	0	0	0	0	0	0	0	0	0	0	0	0.000252748	0.00146762	0.00471755	0.0126813	0.0311285	0.072091	0.159755	0.340309	0.623398	0.692656	0.768087	0.850105	0.939129	1.03558	1.13987	1.2524	1.37353	1.50357	1.64279	1.79131	1.86156	1.93021	1.99653	2.0596	2.47623	2.64553	3.03239	3.25544	3.38852	3.45759
533	0	0	0	0	0	0	0	0	0	0	0	0	0	0	0	0	0	0	0	2.57331e-05	0.000149413	0.000480237	0.0012908	0.00316807	0.00733566	0.0162517	0.0346056	0.0705338	0.0783622	0.0868866	0.0961533	0.106209	0.117101	0.128874	0.141573	0.155237	0.1699	0.185588	0.202314	0.210186	0.217864	0.225261	0.23227	0.263336	0.319973	0.515337	0.608773	0.764916	0.717164
540	0	0	0	0	0	0	0	0	0	0	0	0	0	0	0	0	0	0	0	0.242603	0.782509	1.39715	2.08606	2.84398	3.65773	4.50067	5.32182	6.02151	6.50773	7.01917	7.5562	8.119	8.70757	9.32164	9.96065	10.6237	11.3093	12.0155	12.7396	13.5154	14.305	15.1022	15.8988	16.6841	17.0956	17.4413	17.7004	17.8446	17.6019
548	0	0	0	0	0	0	0	0	0	0	0	0	0	0	0	0	0	0	0	0	0	0	0.0173078	0.0334718	0.0615333	0.109379	0.189821	0.32356	0.354307	0.387402	0.423008	0.461296	0.502452	0.546672	0.594165	0.645152	0.699872	0.758575	0.821532	0.891496	0.966712	1.04755	1.1344	1.22768	1.30133	1.37862	1.4597	1.54476	1.61266
554	0	0	0	0	0	0	0	0	0	0	0	0	0	0	0	0	0	0	0	0	0	0	0	0	0	0	0	0	0	0	0	0	0	0	0	0	0	0.233128	0.474828	1.13871	2.7288	6.53475	15.6387	37.4026	99.1023	183.352	338.809	600.793	798.809
558	0	0	0	0	0	0	0	0	0	0	0	0	0	0	0	0	0	0	0	5.62902	18.008	31.9524	47.5316	64.7881	83.7236	104.278	57.8871	31.4045	34.8299	38.5693	42.6487	47.096	51.9414	57.2175	62.9589	69.2034	75.991	83.3652	91.3722	100.062	121.093	144.163	171.5	185.522	199.874	231.82	269.403	312.88	358.411
562	0	0	0	0	0	0	0	0	0	0	0	0	0	0	0	0	0	0	0	16.095	50.8262	91.0636	136.384	194.772	255.059	330.37	444.729	576.03	610.078	638.867	668.34	698.56	729.597	761.532	794.46	828.493	863.76	900.42	938.662	978.718	1020.88	1065.5	1113.06	1164.17	1219.66	1280.72	1349.05	1427.29	1499.97
566	0	0	0	0	0	0	0	0	0	0	0	0	0	0	0	0	0	0	0	110.82	388.455	694.714	1039	1505.07	2046.96	2664.99	3919.38	5719.47	6019.45	6298.6	6583.78	6875.54	7174.48	7481.29	7796.8	8121.93	8457.83	8805.82	9167.52	9544.9	9940.4	10357.1	10799	11271.2	11780.8	12337.5	12955.7	13657.2	14289.3
570	0	0	0	0	0	0	0	0	0	0	0	0	0	0	0	0	0	0	0	0.0010506	0.00473447	0.011853	0.0249265	0.0481403	0.088381	0.156894	0.271926	0.462915	0.50684	0.554112	0.604962	0.659636	0.718396	0.781521	0.849308	0.922073	1.00015	1.08391	1.17371	1.27351	1.38078	1.49605	1.61988	1.75286	1.89563	2.04887	2.16911	2.29521	2.39579
574	0	0	0	0	0	0	0	0	0	0	0	0	0	0	0	0	0	0	0	0	0	0	0	0	0	0	0	0	0	0	0	0	0	0	0	0	0	0	0	0	0	0	0	0	0	0	0	0	0
578	0	0	0	0	0	0	0	0	0	0	0	0	0	0	0	0	0	0	0	5.88945	17.8676	37.6626	61.9204	86.8887	48.96	105.941	138.691	169.444	180.493	191.953	203.833	216.143	228.891	242.087	255.74	269.858	284.45	299.523	315.087	349.883	402.877	459.321	528.519	605.099	672	716.609	764.864	853.836	896.196
580	0	0	0	0	0	0	0	0	0	0	0	0	0	0	0	0	0	0	0	0.000127382	0.00056286	0.00138026	0.0028398	0.00535856	0.00959732	0.0165916	0.027947	0.0461259	0.0503392	0.0548544	0.0596909	0.0648689	0.0704101	0.0763374	0.0826748	0.089448	0.096684	0.104411	0.11266	0.1218	0.131581	0.142043	0.153231	0.16519	0.177969	0.191621	0.202083	0.212997	0.221453
583	0	0	0	0	0	0	0	0	0	0	0	0	0	0	0	0	0	0	0	0	0	0	0	0	0	0	0	0	0	0	0	0	0	0	0	0	0	0	0	0	0	0	0	0	0	0	0	0	0
584	0	0	0	0	0	0	0	0	0	0	0	0	0	0	0	0	0	0	0	0	0	0	0	0	0	0	0	0	0	0	0	0	0	0	0	0	0	0	0	0	0	0	0	0	0	0	0	0	0
585	0	0	0	0	0	0	0	0	0	0	0	0	0	0	0	0	0	0	0	0.0040934	0.0152427	0.0315285	0.0547714	0.0873674	0.132457	0.194144	0.277771	0.390277	0.426894	0.466254	0.508544	0.553961	0.602715	0.65503	0.711143	0.771308	0.835793	0.904884	0.978884	1.06106	1.14928	1.24398	1.34559	1.45459	1.54011	1.62973	1.72362	1.82198	1.89989
586	0	0	0	0	0	0	0	0	0	0	0	0	0	0	0	0	0	0	0	83.903	253.52	399.087	526.976	615.946	775.085	885.89	1208.03	1531.86	1692.99	1887.97	2103.47	2341.6	2604.67	2895.24	3216.11	3570.37	3961.42	4393.01	4869.25	5499.94	5882.08	6748.71	6939.93	7001.03	7075.59	7467.22	7277.41	7573.21	8520.93
591	0	0	0	0	0	0	0	0	0	0	0	0	0	0	0	0	0	0	0	2.88388	9.34955	16.7971	25.272	34.7896	45.3159	56.7361	30.9611	16.4107	17.8315	19.3433	20.9508	22.6586	24.4716	26.3948	28.4334	30.5925	32.8773	35.2931	37.8452	43.0428	48.9035	55.5057	62.9361	73.472	84.1975	93.5005	110.228	129.818	165.72
598	0	0	0	0	0	0	0	0	0	0	0	0	0	0	0	0	0	0	0	24.0238	73.0804	123.069	173.326	222.921	270.525	314.184	350.858	375.385	386.859	397.902	408.486	418.579	428.147	437.154	445.558	453.311	460.361	466.651	472.112	476.666	480.226	482.684	483.918	483.776	481.433	477.313	471.132	462.518	445.08
600	0	0	0	0	0	0	0	0	0	0	0	0	0	0	0	0	0	0	0	2.57107	7.8822	15.2601	24.0428	33.9294	44.5564	55.4686	60.0613	62.9247	68.0992	73.4052	78.832	84.3688	90.0038	95.7251	101.52	107.374	113.274	119.205	137.26	155.67	174.376	193.317	212.428	223.06	233.57	243.911	254.026	263.855	337.053
604	0	0	0	0	0	0	0	0	0	0	0	0	0	0	0	0	0	0	0	71.043	229.201	392.977	561.279	729.538	891.936	1040.67	360.438	424.69	431.47	437.496	442.764	447.268	451	453.948	456.099	457.437	457.94	457.583	456.334	454.155	530.364	607.059	693.047	794.03	891.269	1042.67	1352.92	1578.85	1670.08
608	0	0	0	0	0	0	0	0	0	0	0	0	0	0	0	0	0	0	0	1.19083	3.57169	10.713	21.6604	36.4129	54.9695	77.3299	142.75	252.766	279.103	306.688	335.521	365.602	396.93	429.507	463.331	498.403	534.723	572.291	611.107	651.171	770.904	949.424	1168.51	1438.29	1719.8	2005.69	2266.29	2578.08	3078.37
612	0	0	0	0	0	0	0	0	0	0	0	0	0	0	0	0	0	0	0	0	0	0	0	0	0	0	0	0	0	0	0	0	0	0	0	0	0	0	0	0	0	0	0	0	0	0	0	0	0
616	0	0	0	0	0	0	0	0	0	0	0	0	0	0	0	0	0	0	0	44.5805	145.719	285.176	584.451	1136.9	1345.46	1748.69	2404.79	3071.81	3303.56	3566.09	3842.98	4134.68	4441.56	4763.99	5102.22	5456.44	5826.72	6212.97	6614.93	7032.06	7567.61	8291.72	9068.65	10495.6	11917.4	14073.1	16193.4	17473	18415.7
620	0	0	0	0	0	0	0	0	0	0	0	0	0	0	0	0	0	0	0	12.2372	42.7025	85.9574	138.978	237.653	198.975	324.132	555.594	592.178	792.892	841.335	881.194	921.387	961.844	1003.88	1046.06	1088.3	1130.49	1172.47	1211.44	1250.15	1330.29	1416.07	1463.09	1580.12	1716.53	1863.78	2047.8	2185.55	2330.28
624	0	0	0	0	0	0	0	0	0	0	0	0	0	0	0	0	0	0	0	0.499969	1.71315	3.26118	5.21474	7.65785	10.6902	14.43	19.017	24.6165	25.9948	27.4272	28.9191	30.4765	32.1064	33.8172	35.6183	37.5212	39.5397	41.6903	43.9933	46.474	49.1643	52.105	55.3498	58.971	63.0685	67.7861	73.3395	80.0731	87.4241
626	0	0	0	0	0	0	0	0	0	0	0	0	0	0	0	0	0	0	0	0.221416	0.830067	1.72887	3.02487	4.86049	7.42456	10.9666	15.8153	22.4027	23.7301	25.0989	26.5102	27.9652	29.465	31.0107	32.6036	34.2448	35.9356	37.6773	39.4711	44.0948	49.2241	54.9121	61.217	68.2032	72.9038	77.8843	83.16	88.7472	93.4283
630	0	0	0	0	0	0	0	0	0	0	0	0	0	0	0	0	0	0	0	0.00279514	0.0122384	0.0296968	0.060353	0.112241	0.197549	0.334292	0.548143	0.873605	1.17538	1.5788	2.11743	2.8357	3.79242	5.06532	6.75707	9.00315	11.9822	15.9294	21.1544	28.0643	34.4634	41.0327	52.3331	64.7299	78.6478	93.1003	107.598	123.812	151.997
634	0	0	0	0	0	0	0	0	0	0	0	0	0	0	0	0	0	0	0	0	0	0	0	0	0	0	0	0	0	0	0	0	0	0	0	0	0	0	4.58502	4.84143	5.09973	5.3575	5.61154	5.85774	5.85208	5.81898	5.75267	5.64526	5.41385
638	0	0	0	0	0	0	0	0	0	0	0	0	0	0	0	0	0	0	0	0.0109041	0.0399285	0.0810794	0.138003	0.215172	0.317961	0.45264	0.626204	0.845863	1.0502	1.30188	1.61151	1.99207	2.45935	3.03259	3.73519	4.59563	6.04158	7.54762	9.03587	10.5256	11.7736	14.0186	14.9953	22.9428	26.0112	26.1697	24.5684	25.7695	25.9754
642	0	0	0	0	0	0	0	0	0	0	0	0	0	0	0	0	0	0	0	46.122	153.08	276.88	413.672	762	735.86	1305.95	1393.27	1781.22	2189.42	2405.26	2637.42	2886.73	3153.98	3439.91	3745.22	4070.48	4416.13	4782.43	5169.39	5576.69	6215.07	6620.25	7034.73	7533.56	8005.49	8448.96	8847.53	9213.98	9574.87
643	0	0	0	0	0	0	0	0	0	0	0	0	0	0	0	0	0	0	0	84.201	269.443	673.608	1414.58	1882.25	2300.53	3502.76	5052.06	6489.09	7644.77	8869.38	10162.9	11525.4	12992.5	14506.9	16095.4	17759.6	19502	21325.5	23186	25318.6	27700.7	33661.2	37350.4	43982.5	48813.7	57591.9	67817.1	77966.1	98206.5
646	0	0	0	0	0	0	0	0	0	0	0	0	0	0	0	0	0	0	0	1.91238	6.77143	13.4936	21.8494	31.7148	42.9549	55.4213	68.7006	82.8071	86.9285	91.0553	95.2922	99.6508	104.144	108.787	113.599	118.599	123.814	129.273	135.015	141.083	147.536	154.447	161.909	170.049	179.039	189.124	200.664	214.224	227.746
654	0	0	0	0	0	0	0	0	0	0	0	0	0	0	0	0	0	0	0	0.000253618	0.000949411	0.00197447	0.00344924	0.00553361	0.00843908	0.0124445	0.0179165	0.0253358	0.0329306	0.0427386	0.0553919	0.0716996	0.0926982	0.119713	0.154441	0.199047	0.256302	0.32974	0.423875	0.544462	0.698843	0.896378	1.14899	1.47188	1.675	1.90507	2.10341	2.30869	1.95435
659	0	0	0	0	0	0	0	0	0	0	0	0	0	0	0	0	0	0	0	0.000459752	0.00273971	0.00906881	0.0252122	0.0643605	0.156158	0.366297	0.838733	1.886	2.1205	2.38062	2.66898	2.98845	3.34217	3.73359	4.16651	4.64508	5.17385	5.75781	6.40244	6.79398	7.20418	7.63384	8.42867	8.60629	10.3959	11.0647	12.0899	12.3542	12.7298
660	0	0	0	0	0	0	0	0	0	0	0	0	0	0	0	0	0	0	0	0	0	0	0	0	0	0	0	0	0	0	0	0	0	0	0	0	0	0	0	0	0	0	0	0	0	0	0	0	0
662	0	0	0	0	0	0	0	0	0	0	0	0	0	0	0	0	0	0	0	0.00547186	0.0174808	0.0309667	0.045978	0.0625297	0.0805863	0.100036	0.120654	0.142038	0.15898	0.177663	0.198252	0.220925	0.245875	0.273311	0.303461	0.336573	0.372914	0.412775	0.456469	0.481668	0.507821	0.534953	0.563087	0.592244	0.62314	0.655173	0.688367	0.722746	0.74844
666	0	0	0	0	0	0	0	0	0	0	0	0	0	0	0	0	0	0	0	0.000123506	0.000742004	0.00247656	0.00694332	0.0178772	0.0437559	0.103555	0.239278	0.543051	0.611143	0.686755	0.770664	0.863722	0.966866	1.08112	1.20763	1.34761	1.50245	1.67362	1.86278	1.97859	2.10006	2.22745	2.36101	2.50102	2.6507	2.80775	2.97249	3.14527	3.28306
670	0	0	0	0	0	0	0	0	0	0	0	0	0	0	0	0	0	0	0	0.000531341	0.00309636	0.0099963	0.0270166	0.0667747	0.156055	0.350186	0.75987	1.59701	1.78165	1.98425	2.20633	2.44952	2.71555	3.00627	3.32366	3.66979	4.04687	4.45722	4.90326	5.14537	5.39307	5.64605	5.90394	6.16627	6.43961	6.71676	6.99689	7.27904	7.46342
674	0	0	0	0	0	0	0	0	0	0	0	0	0	0	0	0	0	0	0	0.00050553	0.00154754	0.00263187	0.00375982	0.00493271	0.0061519	0.00741881	0.00873486	0.0101015	0.0110585	0.0120883	0.0131958	0.0143864	0.0156657	0.0170399	0.0185154	0.0200989	0.0217979	0.02362	0.0255735	0.0276672	0.0299105	0.0323133	0.0348862	0.0376404	0.0405878	0.0437412	0.0471142	0.050721	0.0807977
678	0	0	0	0	0	0	0	0	0	0	0	0	0	0	0	0	0	0	0	0.0166705	0.0625418	0.130353	0.228218	0.366941	0.56085	0.828893	1.19604	1.69514	1.91691	2.16719	2.4497	2.76868	3.12891	3.53576	3.99535	4.51455	5.10113	5.76385	6.51262	7.35858	8.31433	9.39408	10.6138	11.9916	13.5478	15.3053	17.2899	19.5308	21.773
682	0	0	0	0	0	0	0	0	0	0	0	0	0	0	0	0	0	0	0	0	0	0	0	0	0	0	0	0	0	0	0	0	0	0	0	0	0	0	747.443	756.89	786.169	806.396	825.458	843.111	859.063	882.512	906.395	927.65	933.12
686	0	0	0	0	0	0	0	0	0	0	0	0	0	0	0	0	0	0	0	2.5874	9.72777	20.318	35.6468	57.4339	87.9657	130.272	188.355	267.489	282.207	297.471	313.331	329.848	347.09	365.136	384.081	404.036	425.133	447.532	471.43	497.069	524.755	554.878	587.95	624.657	665.944	713.164	768.342	859.349	1083.99
690	0	0	0	0	0	0	0	0	0	0	0	0	0	0	0	0	0	0	0	0.0130841	0.0476715	0.0962314	0.162638	0.251405	0.36753	0.51605	0.700986	0.923003	0.971434	1.02068	1.07071	1.1215	1.17301	1.2252	1.27803	1.33145	1.38539	1.4398	1.4946	1.57107	1.64958	1.73007	1.81245	1.89661	2.01719	2.14296	2.27387	2.40983	2.5174
694	0	0	0	0	0	0	0	0	0	0	0	0	0	0	0	0	0	0	0	0.0817515	0.263713	0.47091	0.70321	0.958889	1.23358	1.51844	1.79652	2.03479	2.3216	2.64358	3.00446	3.40821	3.85914	4.36178	4.92093	5.54158	6.22883	6.98783	7.82355	8.74064	9.74306	10.6286	11.5632	12.5438	18.992	28.6593	43.0915	64.5355	94.9732
702	0	0	0	0	0	0	0	0	0	0	0	0	0	0	0	0	0	0	0	0.00137647	0.00599286	0.0144428	0.0291055	0.0535534	0.0929487	0.154315	0.246129	0.375407	0.498691	0.661129	0.874768	1.15524	1.52277	2.00348	2.63101	3.44852	4.51125	5.88957	7.67271	9.97319	12.9319	16.7236	21.5627	27.7078	35.4641	45.1785	57.2215	71.9411	88.3896
703	0	0	0	0	0	0	0	0	0	0	0	0	0	0	0	0	0	0	0	8.51691	27.5584	53.3473	96.0436	177.86	172.971	232.485	377.427	357.994	384.01	411.202	439.598	469.222	500.095	532.237	565.662	600.379	636.394	673.704	712.298	766.459	823.704	884.109	947.734	1014.62	1063.7	1113.61	1164.18	1215.2	1245.21
704	0	0	0	0	0	0	0	0	0	0	0	0	0	0	0	0	0	0	0	5.03791	15.9008	34.436	59.3127	90.5272	128.077	171.962	247.968	337.174	385.243	435.971	489.358	545.404	604.109	665.473	729.495	796.175	865.515	937.512	1012.17	1089.48	1254.77	1427.19	1606.77	1793.49	1987.36	2458	3096.94	3806.6	4530.04
705	0	0	0	0	0	0	0	0	0	0	0	0	0	0	0	0	0	0	0	4.87183	14.6676	24.4452	34.0698	43.3589	52.0593	59.8055	66.0356	69.7977	74.5963	79.5665	84.7051	90.0069	95.4649	101.07	106.808	112.666	118.622	124.651	130.723	139.4	148.313	157.406	166.6	175.788	193.107	211.254	229.953	248.755	263.452
706	0	0	0	0	0	0	0	0	0	0	0	0	0	0	0	0	0	0	0	0	0	0	0	0	0	0	0	0	0	0	0	0	0	0	0	0	0	0	231.382	240.119	260.876	278.688	297.519	317.423	342.02	368.313	396.413	426.435	452.523
710	0	0	0	0	0	0	0	0	0	0	0	0	0	0	0	0	0	0	0	0	0	0	0	0	0	0	48.9133	158.386	323.219	329.252	334.808	339.887	344.489	348.613	352.26	355.429	358.119	360.331	362.064	363.318	364.092	364.386	440.003	556.143	755.797	1531.71	1924.27	2745.48	3716.53
716	0	0	0	0	0	0	0	0	0	0	0	0	0	0	0	0	0	0	0	2.29107	7.90373	13.1787	18.4583	23.7425	29.0314	68.6497	85.9818	105.126	111.205	117.694	124.495	131.639	139.166	147.122	155.559	164.54	174.143	184.461	195.608	207.727	221.001	235.664	252.027	270.512	291.708	316.467	346.09	382.671	424.274
724	0	0	0	0	0	0	0	0	0	0	0	0	0	0	0	0	0	0	0	92.7319	317.595	656.08	1269.3	1211.9	1771.21	2767.15	3034.6	3914.3	4187.2	4472.43	4770.46	5081.78	5406.89	5746.3	6100.56	6470.21	6855.84	7258.02	7677.38	8437.39	8656.39	9629.55	10777.8	11447.7	12129.6	12763.6	13301.4	14452.2	15231.3
732	0	0	0	0	0	0	0	0	0	0	0	0	0	0	0	0	0	0	0	0	0	0	0	0	0	0	0	0	0	0	0	0	0	0	0	0	0	0	0	0	0	0	0	0	0	0	0	0	0
736	0	0	0	0	0	0	0	0	0	0	0	0	0	0	0	0	0	0	0	74.4555	239.928	414.248	600.15	837.995	1105.71	1403.51	1745.11	2120.87	2224.76	2327.76	2432.96	2540.54	2650.74	2763.8	2880	2999.71	3123.31	3251.3	3384.25	3522.86	3668.03	3820.85	3982.75	4155.59	4341.9	4545.19	4770.57	5025.9	5254.63
740	0	0	0	0	0	0	0	0	0	0	0	0	0	0	0	0	0	0	0	0.22717	0.719373	1.26099	1.84839	2.47388	3.12345	3.77262	4.37848	4.86142	5.44459	6.08551	6.7887	7.55883	8.40066	9.31899	10.3186	11.4039	12.5793	13.8482	15.2136	16.3789	17.5916	18.8452	20.1301	21.4325	23.5751	25.8162	28.1164	30.4111	32.1699
744	0	0	0	0	0	0	0	0	0	0	0	0	0	0	0	0	0	0	0	0	0	0	0	0	0	0	0	0	0	0	0	0	0	0	0	0	0	0	0	0	0	0	0	0	0	0	0	0	0
748	0	0	0	0	0	0	0	0	0	0	0	0	0	0	0	0	0	0	0	0	0	0	0	0	0	0	0	0	0	0	0	0	0	0	0	0	0	0	14.5238	16.201	18.0598	20.1192	22.4	24.9253	27.7205	30.8134	34.2348	38.0188	41.652
752	0	0	0	0	0	0	0	0	0	0	0	0	0	0	0	0	0	0	0	11.7789	35.7353	66.7633	102.213	254.142	115.916	151.379	247.832	469.667	504.468	530.988	610.079	666.217	705.472	782.203	852.367	901.62	959.297	1053.76	1168.55	1361.84	1645.16	1925.08	2293.04	2713.81	3158.74	3381.64	3435.71	3562.92	3647.78
756	0	0	0	0	0	0	0	0	0	0	0	0	0	0	0	0	0	0	0	15.7705	45.7858	98.1132	164.831	323.668	281.075	415.203	552.704	704.526	744.078	784.294	825.101	866.413	908.126	950.12	992.254	1034.36	1076.24	1117.67	1158.37	1298.72	1413.31	1526.17	1639.87	1712.61	1806	1844.1	1829.25	1972.13	2088.4
760	0	0	0	0	0	0	0	0	0	0	0	0	0	0	0	0	0	0	0	83.0231	121.44	215.202	319.432	434.322	427.469	545.035	739.058	848.086	887.729	927.818	968.356	1009.34	1050.78	1092.67	1135	1177.79	1221.04	1264.73	1308.88	1353.49	1449.61	1536.78	1628.13	1723.83	1824.06	2109.72	2406.99	2419.17	2397.71
762	0	0	0	0	0	0	0	0	0	0	0	0	0	0	0	0	0	0	0	5.7767	17.6542	29.8355	43.8998	58.719	73.9014	88.9613	109.529	129.223	143.075	155.611	168.983	183.233	198.408	214.554	231.719	249.953	269.306	289.827	311.569	334.582	358.917	384.623	411.748	440.338	470.435	502.078	535.298	570.121	598.651
764	0	0	0	0	0	0	0	0	0	0	0	0	0	0	0	0	0	0	0	7.90112	24.9436	49.8747	81.4443	119.651	164.494	215.972	280.315	352.953	369.979	391.32	413.325	436.01	459.393	483.493	508.328	533.916	560.277	587.432	644.492	703.788	765.322	829.092	895.099	1055.09	1221.79	1529.46	1857.94	2224.85	2838.49
768	0	0	0	0	0	0	0	0	0	0	0	0	0	0	0	0	0	0	0	6.2796	21.5905	41.2391	66.1646	97.4875	136.543	184.918	244.499	317.523	331.416	345.405	359.49	373.672	387.952	402.33	416.807	431.383	446.058	460.834	475.71	493.161	510.88	528.868	547.129	565.667	591.444	618.044	645.491	673.809	693.852
772	0	0	0	0	0	0	0	0	0	0	0	0	0	0	0	0	0	0	0	0	0	0	0	0	0	0	0	0	0	0	0	0	0	0	0	0	0	0	0	0	0	0	0	0	0	0	0	0	0
776	0	0	0	0	0	0	0	0	0	0	0	0	0	0	0	0	0	0	0	0.0473622	0.145068	0.246096	0.349364	0.645996	1.1286	1.89106	3.05821	4.77379	5.17472	5.59935	6.04858	6.52328	7.02433	7.55251	8.10858	8.69319	9.3069	9.95012	10.6231	11.3573	12.1253	12.9267	13.7608	14.6265	15.212	15.7943	16.3693	16.9323	17.2495
780	0	0	0	0	0	0	0	0	0	0	0	0	0	0	0	0	0	0	0	6.27883e-05	0.000364499	0.00117129	0.00314737	0.00772188	0.0178711	0.0395641	0.0841525	0.171188	0.263596	0.405071	0.621266	0.951037	1.45313	2.21616	3.37355	5.12566	7.77268	11.763	17.7645	26.7678	28.8799	20.1586	35.6231	45.1104	54.2556	73.9048	90.4585	101.57	129.011
784	0	0	0	0	0	0	0	0	0	0	0	0	0	0	0	0	0	0	0	0	0	0	0	0	0	0	0	0	0	0	0	0	0	0	0	0	0	0	12.2784	12.9671	13.6615	14.3551	15.0397	15.7044	16.3559	16.9561	17.4792	17.8894	17.8985
788	0	0	0	0	0	0	0	0	0	0	0	0	0	0	0	0	0	0	0	31.8696	97.1913	152.51	222.724	283.752	274.897	321.865	459.883	413.021	429.393	452.247	475.978	500.676	526.445	553.405	581.7	611.498	643.001	676.454	712.155	750.476	791.883	836.977	886.541	941.63	1003.7	1074.83	1158.16	1258.64	1366.72
792	0	0	0	0	0	0	0	0	0	0	0	0	0	0	0	0	0	0	0	366.311	1182.49	1414.18	2286.77	3308.47	3170.57	3911.09	5555.86	6362.86	6655.17	6968.44	7284.78	7603.9	7925.45	8249.03	8574.17	8900.33	9226.88	9553.09	9878.11	10200.9	10761.8	11301.9	11852	12409.7	12972	13370.3	13731.2	14066.5	14178.2
795	0	0	0	0	0	0	0	0	0	0	0	0	0	0	0	0	0	0	0	6.48291	19.8927	35.2314	52.1773	70.6816	91.5263	117.04	156.239	194.364	215.529	236.047	258.162	281.989	307.647	335.267	364.985	396.949	431.314	468.248	507.929	550.546	596.3	645.409	698.101	754.621	815.23	880.206	949.843	1024.46	1089.98
796	0	0	0	0	0	0	0	0	0	0	0	0	0	0	0	0	0	0	0	1.80017e-05	0.000105701	0.000344287	0.000940359	0.00235404	0.00558883	0.0127941	0.0284984	0.0620888	0.0695702	0.0778336	0.0869541	0.0970139	0.108103	0.120317	0.133765	0.148561	0.164831	0.182712	0.202354	0.213853	0.225824	0.238282	0.251242	0.26472	0.279042	0.293948	0.309454	0.32558	0.33788
798	0	0	0	0	0	0	0	0	0	0	0	0	0	0	0	0	0	0	0	0.00068825	0.00307902	0.00765177	0.0159714	0.030612	0.0557693	0.0982304	0.168904	0.285224	0.312034	0.340859	0.371835	0.405109	0.440834	0.479176	0.520311	0.564424	0.611714	0.662392	0.716682	0.776974	0.841722	0.911233	0.985834	1.06587	1.12873	1.19462	1.26367	1.33601	1.39339
800	0	0	0	0	0	0	0	0	0	0	0	0	0	0	0	0	0	0	0	12.0431	41.3379	81.0459	130.512	189.768	258.847	337.781	455.216	590.274	619.869	650.148	681.263	713.292	746.323	780.456	815.813	852.531	890.777	930.748	972.687	1016.89	1063.71	1113.64	1167.26	1225.37	1289.05	1359.83	1439.95	1532.88	1622.96
804	0	0	0	0	0	0	0	0	0	0	0	0	0	0	0	0	0	0	0	11.7692	39.6436	104.325	230.614	312.109	401.543	666.036	1011.19	1608.44	1966.44	2268.97	2614.45	3008.7	3458.27	3772.08	4110.08	4473.99	4865.65	5287.03	5740.2	6318.57	6967.4	7783.98	8367.43	9793.3	11284.2	13614.2	16395.4	20423.7	25416.1
807	0	0	0	0	0	0	0	0	0	0	0	0	0	0	0	0	0	0	0	3.85733	11.447	19.5992	28.0302	36.5995	45.1393	53.4439	71.6778	76.5688	79.8969	85.2605	90.8471	96.6625	102.713	109.003	115.541	122.329	129.376	136.684	144.259	160.403	178.185	197.756	219.281	242.935	277.314	316.29	360.441	410.414	460.837
818	0	0	0	0	0	0	0	0	0	0	0	0	0	0	0	0	0	0	0	47.4824	150.446	201.579	238.175	327.593	311.083	323.494	409.448	359.365	359.508	358.837	357.381	355.173	352.243	348.623	344.343	339.434	333.928	327.856	368.49	409.329	450.247	491.12	531.824	475.083	544.016	622.285	864.825	1048.45	1180.44
826	0	0	0	0	0	0	0	0	0	0	0	0	0	0	0	0	0	0	0	35.0824	142.489	349.646	792.587	1315.85	689.989	813.894	1199.77	1682.5	1878.86	2085.4	2284.13	2527.68	2777.65	2939.58	3099.44	3252.51	3233.3	3183.2	2862.07	3388.99	3546.57	4311.38	4071.03	3507.7	4705.41	5246.24	5726.38	6268.7	6686.26
834	0	0	0	0	0	0	0	0	0	0	0	0	0	0	0	0	0	0	0	12.1137	41.5818	110.581	212.739	348.169	516.986	396.467	556.132	742.363	782.547	822.124	862.952	905.147	948.847	994.208	1041.42	1090.69	1142.28	1196.5	1253.72	1314.42	1379.17	1448.71	1523.98	1606.27	1697.31	1799.56	1916.64	2054.23	2192.9
840	0	0	0	0	0	0	0	0	0	0	0	0	0	0	0	0	0	0	0	20.4717	68.462	123.759	192.96	270.356	369.495	480.04	261.888	376.274	541.477	730.743	962.472	1222.8	1535.2	1912.63	2382.77	2983.75	3770.07	5505.75	7850.08	11148	16185	23726.5	33334.5	48500.9	56544.3	86761.1	110719	129975	151689
850	0	0	0	0	0	0	0	0	0	0	0	0	0	0	0	0	0	0	0	0.000314568	0.00184184	0.00597966	0.0162703	0.0405472	0.0957456	0.217739	0.481007	1.03684	1.20649	1.40169	1.62608	1.88381	2.17957	2.5187	2.90726	3.3521	3.861	4.44278	5.10741	5.22482	5.3403	5.45377	5.56517	5.67442	5.49512	5.31757	5.14206	4.96886	4.73561
854	0	0	0	0	0	0	0	0	0	0	0	0	0	0	0	0	0	0	0	8.38785	28.4922	53.7683	85.2326	124.079	171.711	229.772	300.187	385.208	401.918	421.197	440.974	461.292	482.205	503.773	526.065	549.165	573.17	598.197	624.387	651.914	680.994	711.9	744.984	780.711	819.714	862.88	911.51	967.616	1021.05
858	0	0	0	0	0	0	0	0	0	0	0	0	0	0	0	0	0	0	0	0.353957	1.14983	2.07055	3.12375	4.3142	5.64177	7.09829	8.6623	10.29	11.1903	12.1496	13.1713	14.2585	15.4148	16.6437	17.9489	19.3341	20.8032	22.3604	24.0097	25.7552	35.3987	48.0078	65.0494	118.834	174.1	238.713	357.409	482.366	548.47
860	0	0	0	0	0	0	0	0	0	0	0	0	0	0	0	0	0	0	0	16.1103	50.4391	90.8763	136.815	188.3	245.374	310.548	410.693	525.128	581.654	637.763	698.325	763.663	834.12	910.066	991.893	1080.02	1174.9	1277.01	1386.86	1504.99	1631.99	1768.49	1915.14	2072.66	2241.79	2423.36	2618.21	2827.26	3011.7
862	0	0	0	0	0	0	0	0	0	0	0	0	0	0	0	0	0	0	0	8.18203	23.8484	41.0796	59.0116	77.2659	95.3805	112.771	122.538	161.43	168.607	175.806	183.019	190.241	197.464	204.68	211.879	219.054	226.192	233.284	240.316	299.681	373.287	464.446	577.217	716.558	814.477	924.7	1058.72	1090.42	1095.71
876	0	0	0	0	0	0	0	0	0	0	0	0	0	0	0	0	0	0	0	0	0	0	0.0284624	0.0548577	0.10051	0.178066	0.307999	0.523271	0.572808	0.626107	0.683427	0.745043	0.811248	0.882355	0.958696	1.04062	1.12852	1.22278	1.32382	1.4361	1.55675	1.68637	1.82559	1.97506	2.09287	2.21645	2.34605	2.48195	2.53922
882	0	0	0	0	0	0	0	0	0	0	0	0	0	0	0	0	0	0	0	0.00754711	0.0340386	0.085287	0.179501	0.346946	0.637464	1.13251	1.96437	3.34661	3.66444	4.00653	4.37453	4.77025	5.19557	5.65253	6.14328	6.67011	7.23548	7.84197	8.49236	9.21513	9.9921	10.8271	11.7241	12.6875	14.6247	16.8481	19.399	22.3246	16.6302
887	0	0	0	0	0	0	0	0	0	0	0	0	0	0	0	0	0	0	0	0	0	0	0	0	0	0	0	0	0	0	0	0	0	0	0	0	0	0	918.632	938.601	954.971	979.54	1002.69	1024.14	1043.52	1079.45	1111.67	1139.34	1146.3
891	0	0	0	0	0	0	0	0	0	0	0	0	0	0	0	0	0	0	0	20.5272	64.7395	115.1	456.423	229.379	210.781	308.412	416.809	449.872	484.132	519.407	555.665	592.876	631.007	670.025	709.896	750.585	792.056	834.272	877.195	920.785	965.001	1009.8	1287.58	1574.17	1869.21	2172.32	2483.14	2801.24	3085.45
894	0	0	0	0	0	0	0	0	0	0	0	0	0	0	0	0	0	0	0	5.93233	20.5165	41.1527	67.4105	99.3361	136.975	180.374	226.445	277.51	292.675	309.824	327.801	346.693	366.602	387.649	409.973	433.744	459.165	486.481	515.997	548.092	583.249	622.089	665.436	714.406	770.557	836.152	914.627	1011.53	1121.76
	0	0	0	0	0	0	0	0	0	0	0	0	0	0	0	0	0	0	0	5334.27	16321.3	32419.9	51538.7	67716.4	73779.3	100358	121286	148521	160779	173782	186689	199933	216000	230856	246673	264215	283029	304115	329347	355901	386890	426743	467675	513437	552179	622719	693022	763484	852721
[truncated: 107 more columns]

## Sheet: upper2
ISO1	y-10000	y-9000	y-8000	y-7000	y-6000	y-5000	y-4000	y-3000	y-2000	y-1000	y0	y100	y200	y300	y400	y500	y600	y700	y800	y900	y1000	y1100	y1200	y1300	y1400	y1500	y1600	y1700	y1710	y1720	y1730	y1740	y1750	y1760	y1770	y1780	y1790	y1800	y1810	y1820	y1830	y1840	y1850	y1860	y1870	y1880	y1890	y1900	y1910
4	0	0	0	6.3394	8.62364	35.1816	423.139	2186.7	2880.21	3398.03	6014.19	6526.58	6987.88	6726.12	6466.52	6209.08	5953.83	5529.76	5122.96	4785.25	4459.5	4475.33	4468.97	2960.49	2993.8	3005.04	3522.89	3291.36	3317.23	3336.32	3354.78	3372.6	3389.74	3406.16	3421.83	3436.72	3450.79	3464	3476.32	3487.71	3533.87	3657.11	3783.49	3912.99	4045.61	4243.53	4499.72	4769.65	5110.04
8	0	0	0	0	0	0	0	0	0	382.445	545.893	524.534	503.252	482.042	460.897	439.808	418.762	397.745	376.737	355.354	333.961	312.508	290.93	269.133	246.976	224.245	200.583	263.007	266.343	269.203	271.586	273.492	274.92	275.869	276.336	276.32	275.815	274.818	273.323	271.321	266.449	272.459	278.164	294.817	309.121	325.923	339.793	356.183	372.893
12	0	0	0	0	134.275	659.386	3236.98	3991.29	3743.1	4894.82	5998.55	5606.61	5234.28	4880.8	4545.45	4227.52	3926.32	3641.2	3371.51	3461.14	3523.62	3229.21	2951.61	2450.37	1996.63	1898.33	2646.29	1907.47	1958.65	2007.13	2052.93	2096.08	2136.59	2174.5	2209.84	2242.63	2272.89	2300.66	2325.95	2348.8	2701.6	3038.65	3360.1	3666.11	3956.84	4232.44	4493.06	4738.87	5025.24
16	0	0	0	0	0	0	0	0	0	0	0	0	0.010356	0.0148599	0.0212834	0.030422	0.0433864	0.0617196	0.0875488	0.123781	0.174343	0.244457	0.340915	0.47225	0.648565	0.880449	1.17551	1.52847	1.56775	1.60697	1.64599	1.68467	1.72285	1.76034	1.79693	1.83238	1.86642	1.89874	1.92897	1.96215	1.9925	2.01944	2.04226	2.06011	2.20828	2.35877	2.50874	2.65403	2.81952
20	0	0	0	0	0	0	0	0	0	1.90786	3.33656	3.26703	3.19401	3.11736	3.03692	2.95251	2.86392	2.77089	2.67312	2.57025	2.46179	2.34714	2.22547	2.09562	1.95591	1.80372	1.63465	1.44039	1.4766	1.51264	1.54838	1.58366	1.61832	1.65215	1.68494	1.71643	1.74633	1.77431	1.79997	1.82288	1.8425	1.8582	1.86922	1.87466	1.87336	1.86389	1.84433	1.81212	1.78319
24	0	0	0	0	0	0.872835	4.28483	21.0274	34.9876	58.1443	96.5149	125.852	164.009	213.604	278.015	361.603	469.985	610.389	792.104	1001.37	1197.43	1356	1502.71	1637.5	1848.33	2041.2	2092.91	2135.45	1000.86	1001.24	1002.04	1003.32	1005.12	1007.53	1010.62	1014.5	1019.28	1025.13	1032.21	1040.76	1051.06	1063.5	1078.57	1096.95	1119.56	1147.76	1183.58	1230.27	1307.81
28	0	0	0	0	0	0	0	0	0	1.45779	2.86146	3.04918	3.24744	3.45661	3.67707	3.90915	4.15316	4.40938	4.67806	4.95937	5.25344	5.56032	5.87996	6.21223	6.55685	6.91343	7.28139	7.65997	8.39525	9.19947	10.0789	11.0403	12.0911	13.2393	14.4935	15.8631	17.3585	18.9905	20.7711	22.7132	24.8307	25.5537	24.5651	21.7505	19.1526	17.1501	16.2267	14.3423	12.6452
31	0	0	0	0	0	6.98295	23.9959	82.4305	98.6187	117.333	138.975	145.878	153.031	160.432	168.077	175.963	184.082	192.426	200.982	206.89	212.159	309.374	400.594	485.755	376.53	455.467	528.2	594.671	382.382	408.765	436.886	466.852	498.773	532.769	568.962	607.483	648.466	692.056	738.401	787.656	839.986	895.558	954.551	1017.15	1083.54	1153.91	1228.49	1307.46	1406.5
32	0	0	0	0	0	31.0396	34.8288	39.0673	43.8059	53.824	60.307	67.3006	75.0616	83.6665	93.1981	103.746	115.405	128.278	142.473	158.107	175.3	194.178	214.873	237.518	262.247	289.195	318.49	350.253	394.952	445.274	501.914	565.649	637.351	717.995	808.673	910.607	1025.16	1153.86	1298.41	1476.43	1660.56	1867.17	2100.08	2360.09	2671.33	3000.31	3368.77	3781.28	8409.43
36	0	0	0	0	0	0	0	0	0	0	0	0	0	0	0	0	0	0	0	0	0	0	0	0	0	0	0	0	0	0	0	0	0	0	0	0	9.44351	18.7607	25.7357	33.4896	49.9807	91.5873	234.965	560.869	1014.09	2087.43	2432.74	3826.54	6000.53
40	0	0	0	0	0	1.22222	9	53	156	255	1250	1342.65	1429.41	1277.94	1132.35	992.647	858.824	939.706	1014.71	1182.35	1338.24	1667.65	2242.65	3470.59	2095.57	3234.91	3268.79	3125.13	3231.53	3328.05	3413.23	3485.34	3542.3	3566.49	3561.82	3536.39	3469.69	3316.85	3119.22	3049.35	3088.69	2988.66	2907.54	2850.85	2804.82	2806	2787.18	2791.42	2802.68
44	0	0	0	0	0	0	0	0	0	0	0	0.0572804	0.0609819	0.0648832	0.0689897	0.0733066	0.0778383	0.0825881	0.0875582	0.0927494	0.0981608	0.10379	0.109631	0.115676	0.121914	0.128331	0.134906	0.141617	0.153427	0.166193	0.179986	0.194887	0.21098	0.228355	0.247108	0.267344	0.289173	0.312713	0.338088	0.343899	0.349722	0.47838	0.57769	0.679938	0.86832	1.09253	1.35838	1.67252	2.06524
48	0	0	0	0	0	0	0	0	0	0	0	0	0	0	0	0	0	0	0	0	0	0	0	0	0	0	0	0	0	0	0	0	0	0	0	0	0	0	1.57611	1.60762	1.63828	1.66789	1.69623	1.72307	1.75038	1.77567	1.79857	1.81868	1.85589
50	0	0	0	0	0	31.0211	152.285	747.325	1222.04	1997.57	3264	3421.55	3567.81	3747.39	3913.41	4065.88	4204.8	4530.64	4831.62	5259.11	5652.71	5692.24	5718.21	5530.73	6051.37	6211.58	7778.88	9176.37	9283.49	9330.45	9371.84	9406.48	9432.86	9449.17	9453.25	9442.53	9414.06	9364.55	9290.51	9315.21	9306.94	9262.1	9178.51	9056.11	8974.95	8805.63	8856.23	8816.23	8786.72
51	0	0	0	0	2.75945	9.48561	32.596	111.973	118.986	123.704	123.615	127.138	130.565	133.864	137.001	139.934	142.617	144.996	147.007	146.671	145.369	204.062	253.322	293.638	215.114	244.764	262.215	271.27	278.592	285.946	293.316	300.682	308.022	315.311	322.519	329.616	336.566	343.327	349.854	356.094	361.987	367.465	372.45	376.849	380.556	383.444	385.363	386.13	389.801
52	0	0	0	0	0	0	0	0	0	0	0	0.0033065	0.00346169	0.00361874	0.00377677	0.00393469	0.00409122	0.00424481	0.00439357	0.00453528	0.00466723	0.00478613	0.0179225	0.0667879	0.247418	0.909834	3.3139	11.9137	11.6651	11.4176	11.1711	10.9256	10.6812	10.4379	10.1956	9.9543	9.71408	9.4749	10.6223	11.6995	12.7072	13.6456	14.5152	14.9135	15.267	15.576	15.8407	16.0614	16.244
56	0	0	0	0	0	1.16224	11.411	67.1983	122.333	272.239	698.217	696.283	693.284	689.137	683.749	651.471	371.585	469.787	475.897	523.202	561.302	786.76	1096.71	1405.86	823.143	1162.71	1239.75	1250.02	1332.81	1409.46	1479.96	1544.28	1602.4	1654.29	1699.89	1739.14	1771.98	1798.29	1817.96	1830.82	1908.94	1845.18	1889.86	1931.19	1951.38	2039.87	2150.4	2128.26	2121.76
60	0	0	0	0	0	0	0	0	0	0	0	0.0890058	0.0931473	0.0973316	0.101533	0.105722	0.109862	0.113907	0.117805	0.121492	0.124889	0.127903	0.130416	0.13228	0.133307	0.133245	0.131744	0.128282	0.139439	0.151505	0.164545	0.178628	0.193826	0.210217	0.227877	0.246891	0.267341	0.289315	0.312902	0.33819	0.365269	0.394227	0.425149	0.458114	0.493197	0.530459	0.569951	0.611703	0.663008
64	0	0	0	0	0	0	0	0	0	0	0	1.47895	1.96816	2.61758	3.47907	4.62096	6.13327	8.13441	10.7799	9.51587	8.39255	7.39484	6.50917	6.29575	6.03207	6.61411	7.72557	8.44777	9.57648	10.1261	10.7101	11.3306	11.9896	12.6894	13.4324	14.2211	15.0581	15.9462	16.8882	19.4616	21.2451	24.8912	26.1483	26.9566	28.4682	31.4028	31.9962	34.8177	41.9737
68	0	0	0	0	0	81.196	265.732	869.371	880.963	874.141	835.441	855.292	874.362	892.469	909.409	924.951	938.833	950.757	960.382	998.364	1025.89	1058.91	1079.09	1086.14	1079.54	1058.45	851.236	757.838	755.237	752.325	749.091	745.524	741.613	737.347	732.713	727.698	722.29	716.473	710.234	819.694	945.32	929.18	912.399	1055.45	878.382	710.836	1119.86	944.382	1059.63
70	0	0	0	0	0	10.8777	50.8869	237.971	344.754	489.12	668.576	651.722	634.955	617.666	599.837	581.452	562.486	542.914	522.704	501.815	480.199	476.504	469.377	458.703	444.299	425.873	471.534	420.577	436.03	443.744	451.4	458.982	466.473	473.854	481.103	488.201	495.121	501.84	508.33	524.344	540.481	556.698	572.943	589.161	632.395	678.136	726.418	777.248	839.828
72	0	0	0	0	0	0	0	0	0	0	0	0	0	0	0	0	0	0	0	0	0	0	0	0	0	0	0	0	0	0	0	0	0	0	0	0	0	0	118.995	120.076	121.368	122.917	124.784	127.048	129.825	133.276	137.65	143.342	152.713
76	0	0	0	0	0	0	22.84	44.834	87.9761	172.569	338.37	353.085	368.227	383.784	399.742	416.082	432.783	449.815	467.148	461.651	455.771	489.382	519.968	547.53	572.068	636.772	162.854	204.847	219.523	235.389	252.384	270.818	291.05	313.006	337.138	363.822	393.531	426.869	520.321	629.023	786.12	938.897	1087.49	1232.04	1372.98	1501.06	1831.89	2180	2727.99
84	0	0	0	0	0	0	1.03198	3.79827	4.33141	4.83764	5.20673	5.45696	5.71112	5.96795	6.22592	6.48317	6.73744	6.98606	7.22578	7.45269	7.66206	7.84812	8.00374	8.12	8.18541	8.18476	8.09694	7.89061	8.35278	8.83848	9.3485	9.88364	10.4447	11.0323	11.6471	12.2898	12.9609	13.6607	14.3896	14.4668	14.5346	14.5922	14.6389	14.6738	15.9998	17.4294	18.9678	20.6199	22.6386
86	0	0	0	0	0	0	0	0	0	0	0	0	0	0	0	0	0	0	0	0	0	0	0	0	0	0	0	0	0	0	0	0	0	0	0	0	0	0	0	0	0	0	0	0	0	0	0	0	0
90	0	0	0	0	0	0	0	0	0	0	0	0.0132489	0.0190613	0.0273808	0.0392647	0.0562013	0.080278	0.114407	0.162628	0.230504	0.325627	0.458236	0.641929	0.894354	1.23764	1.69795	2.30259	3.07112	3.75365	4.58587	5.60006	6.83529	8.33885	10.1678	12.3912	15.092	18.3702	22.3462	27.1642	27.8643	28.5605	29.25	29.9299	30.5967	30.6228	30.6152	30.5711	30.4872	30.6974
92	0	0	0	0	0	0	0	0	0	0	0	1.96117e-05	3.83947e-05	7.51192e-05	0.000146872	0.000286962	0.00056026	0.00109299	0.00213053	0.00414939	0.00807389	0.0156949	0.0304781	0.0591206	0.114546	0.221656	0.428343	0.826565	0.882627	0.942318	1.00586	1.07348	1.14541	1.22192	1.30326	1.38971	1.48157	1.57914	1.68274	1.71211	1.74156	1.77105	1.80056	1.83005	1.86156	1.89304	1.92447	1.95579	2.00904
96	0	0	0	0	0	0	0	0	0	0	0	0.295791	0.393631	0.523517	0.695813	0.924191	1.22665	1.62688	2.15598	1.90317	1.67851	1.77476	2.60367	2.5183	2.41283	1.76376	1.93139	2.02747	2.18353	2.47295	2.80148	3.17442	3.59779	4.07842	4.62407	5.24352	5.94676	6.74507	7.65126	8.53872	9.02688	10.2421	10.4196	10.4025	10.089	10.2205	10.0109	10.4297	11.9945
100	0	0	0	0	0	11.1313	60.1089	324.477	544.12	895.119	1424.59	1781.44	2106.33	1831.26	1572.72	1330.52	1104.51	1052.37	1000.54	1233.69	1436.33	1473.13	1480.01	1489.73	763.395	1028.72	1478.78	1348.39	1367.43	1404.74	1442.63	1481.08	1520.08	1559.6	1599.6	1640.06	1680.93	1722.18	1763.75	1805.66	1819.85	1870.36	1921.41	1906.99	1891.24	2148.29	2400.32	2227.48	2562.06
104	0	0	0	0	0	3.94384	12.9071	42.227	45.3	494.162	939.043	1008.57	1073.67	1134.36	1190.64	1242.5	1289.95	1332.98	1371.59	1405.8	1435.58	1739.24	2020.8	1889.37	2171.48	2429.3	2633.56	2815.73	2833.75	2850.27	2865.28	2878.8	2890.81	2901.32	2910.33	2917.84	2923.84	2928.34	3075.51	3216.67	3351.82	3480.97	3604.11	3942.74	4267.86	4579.31	5522.68	6527.82	7902.78
108	0	0	0	0	0	0.308593	1.21193	4.75794	5.9729	7.4518	9.22159	13.0192	18.3679	25.8954	36.4799	51.3499	72.2205	101.484	142.472	171.718	198.482	232.346	263.055	290.653	315.19	336.715	353.99	368.474	369.127	368.122	367.237	366.489	365.893	365.47	365.243	365.239	365.493	366.046	366.948	368.261	370.066	372.466	375.595	379.636	384.842	391.573	400.373	412.101	432.982
112	0	0	0	0	0	50.7352	174.345	598.906	636.681	662.382	662.819	715.948	762.658	802.998	837.009	798.208	759.575	781.175	796.487	805.485	808.108	1135.41	1587.46	1470.82	1352.54	1642.14	1843.97	2164.35	2497.22	2640.37	2790.22	2946.88	3110.46	3281.02	3458.58	3643.12	3834.55	4032.7	4237.34	4448.12	4664.56	4886.04	5111.76	5340.71	5571.61	5802.87	6032.48	6257.98	6548.22
116	0	0	0	0	0	8.13473	35.3054	153.771	210.698	285.804	380.681	395.491	410.467	425.56	440.712	455.857	470.921	485.818	500.452	504.777	506.865	530.884	550.339	565.304	575.849	582.046	607.686	626.141	623.404	620.468	617.332	614	610.472	606.749	602.835	598.73	594.435	589.953	585.286	580.434	580.342	582.795	585.085	587.204	589.144	615.638	674.1	736.775	812.829
120	0	0	0	0	0	6.54917	28.9354	127.798	195.102	296.661	449.572	503.144	562.76	629.041	702.66	784.348	874.89	975.13	1085.97	1208.36	1343.32	1491.92	1655.24	1834.43	2030.64	2245.03	2478.72	2732.79	2676.31	2666.36	2657.06	2648.5	2640.77	2633.99	2628.28	2623.8	2620.74	2619.32	2619.84	2622.63	2628.14	2636.93	2649.75	2667.59	2691.82	2724.38	2768.21	2827.85	2943.37
124	0	0	0	0	0	0	0	0	0	0	0	0	0	0	0	0	0	0	0	0	0	0	0	0	0	0	0	30.7548	39.2969	50.254	64.3198	82.3898	105.621	135.507	173.982	295.164	393.255	564.689	760.141	1027.76	1395.82	1906.92	2613.58	4177.96	5693.42	6940.64	8551.97	9229.09	15819.8
132	0	0	0	0	0	0	0	0	0	0	0	0	0	0	0	0	0	0	0	0	0	0	0	0	0	0	3.56509	6.6695	7.0211	7.48096	7.96922	8.48749	9.0374	9.62071	10.2392	10.8948	11.5894	12.3251	13.104	13.9283	14.8002	15.722	16.6963	17.7253	18.8117	19.958	21.1669	22.4409	24.0472
136	0	0	0	0	0	0.000354285	0.00208706	0.0122905	0.0223742	0.0398328	1.2304	1.28802	1.34625	1.40476	1.4631	1.52075	1.57708	1.63133	1.68257	1.72968	1.77126	1.80558	1.83043	1.84294	1.83921	1.8137	1.7579	1.65706	1.74622	1.83888	1.93499	2.03447	2.13721	2.24301	2.35164	2.46278	2.57601	2.6908	2.80649	2.79088	2.77009	2.74351	2.71039	2.66986	2.6237	2.56749	2.49932	2.41663	2.34147
140	0	0	0	0	0	5.17925	22.8828	101.066	154.657	235.611	357.615	368.685	379.866	391.138	402.476	413.852	425.237	436.596	447.892	459.084	470.125	480.964	491.547	501.811	511.69	521.109	529.989	538.242	532.98	533.698	534.661	535.898	537.445	539.344	541.643	544.402	547.692	551.6	556.233	561.727	568.253	576.034	585.362	596.637	610.414	627.497	649.103	677.178	723.039
144	0	0	0	0	0	11.3504	41.7902	153.811	175.979	197.6	214.857	241.194	264.9	286.003	304.529	320.505	333.955	344.902	353.368	359.37	362.92	385.438	402.981	366.433	327.898	327.355	377.511	414.616	409.092	393.464	378.327	363.667	349.47	335.724	322.417	309.535	297.068	285.003	273.329	262.035	285.449	389.483	532.08	676.27	745.276	730.264	775.973	902.619	990.687
148	0	0	0	0	0	10.5065	41.2618	161.991	219.612	296.594	399.27	446.822	499.735	558.561	623.897	696.39	776.736	865.684	964.031	990.69	1014.34	1059.6	1100.36	1168.12	1260.68	1303.92	1469.58	1620.13	1650.84	1641.93	1633.33	1625.07	1617.21	1609.79	1602.87	1596.54	1590.88	1585.99	1582.01	1579.1	1577.47	1577.38	1579.18	1583.32	1590.44	1601.43	1617.62	1641.09	1693.92
152	0	0	0	0	0	19.249	59.801	186.637	181.753	325.226	561.515	578.78	595.758	612.323	628.334	643.627	658.018	671.293	683.209	692.814	697.318	721.277	736.913	744.098	742.606	732.057	667.337	602.762	605.838	608.715	611.381	613.826	616.037	618.002	619.708	621.143	622.292	623.141	623.675	671.536	722.667	777.24	935.351	1143.21	1309.24	1479.19	1626.87	1771.15	2002.86
156	0	0	0	87.8421	351.562	1288.92	3630.3	7937.36	15575.2	30551.3	59904.6	52914.4	44234	22331.8	30431.3	37553.4	50262	41398.1	32238.6	38678.7	35859.3	86596.1	97850.2	75362	66580.9	83890.7	88376.9	88927	91654.3	94692.3	95348	94976.1	95312.5	95033.2	94950.3	96116.7	97689.1	98995.9	101821	103444	103314	102258	101174	99875.5	98061.3	96849	97785.8	98712.7	101283
158	0	0	0	0	0	2.70456	10.6215	41.6994	50.6132	60.0815	68.488	65.7244	62.9755	60.2404	57.5181	54.8074	52.1064	49.4132	46.7248	44.0375	41.3464	46.3737	50.2922	53.0685	54.6461	54.9291	48.8615	211.551	234.467	240.292	246.083	251.818	257.47	263.012	268.411	273.63	278.626	283.352	287.752	291.76	288.362	286.259	283.521	279.65	274.691	269.111	262.17	281.897	303.633
162	0	0	0	0	0	0	0	0	0	0	0	0	0	0	0	0	0	0	0	0	0	0	0	0	0	0	0	0	0	0	0	0	0	0	0	0	0	0	0	0	0	0	0	0	0	0	0	0	0
166	0	0	0	0	0	0	0	0	0	0	0	0	0	0	0	0	0	0	0	0	0	0	0	0	0	0	0	0	0	0	0	0	0	0	0	0	0	0	0	0	0	0	0	0	0	0	0	0	0
170	0	0	0	0	0	179.711	661.663	2435.29	2772.81	3088.94	3307.82	3384.27	3457.3	3526.14	3589.92	3647.65	3698.21	3740.33	3772.51	3914.77	4014.21	4258.05	4431.52	4532.48	4557.43	9705.88	7092.65	5224.02	5609.2	5994.23	6378.61	6761.83	7143.4	7522.81	7899.58	8273.2	8643.17	9009	7660.8	6433.98	6763.13	7080.55	7290	7042.08	6698.33	7060.57	7117.26	7134.6	7253.67
174	0	0	0	0	0	0	0	0	0	0	0	0	0	0	0	0	0	0	0	4.17241	8.07969	9.37858	10.5731	11.6638	12.6513	13.5361	16.2713	18.75	18.4033	19.4473	20.5467	21.7041	22.9221	24.2035	25.5512	26.968	28.4571	30.0215	31.6645	33.3891	35.1989	37.097	39.0871	41.1724	43.3565	45.6429	48.0351	50.5365	53.7412
175	0	0	0	0	0	0	0	0	0	0	0	0	0	0	0	0	0	0	0	0	0	0	0	0	0	0	0	0	0	0	0	0	0	0	0	0	0	0	0	0	0	0	0	0	0	0	0	0	0
178	0	0	0	0	0	1.30657	5.13126	20.145	26.4942	34.8288	45.7639	51.0972	57.0188	63.5878	70.8682	78.9288	87.8435	97.6918	108.558	120.531	133.705	148.179	164.054	181.435	200.426	221.132	243.654	268.088	265.856	264.703	263.612	262.589	261.645	260.789	260.033	259.392	258.883	258.528	258.353	258.389	258.678	259.272	260.239	261.671	263.695	266.49	270.324	275.616	286.218
180	0	0	0	0	0	11.0524	41.9312	159.192	199.838	250.97	315.313	400.819	509.889	649.062	826.685	1053.42	1342.84	1712.26	2183.72	2383.19	2566.47	2899.28	3205.17	3484.21	3923.29	4322.21	4421.02	4500.01	4474.63	4442.2	4410.42	4379.36	4349.12	4319.79	4291.52	4264.44	4238.73	4214.62	4192.37	4172.31	4154.84	4140.51	4129.99	4124.21	4124.41	4132.36	4150.69	4183.43	4284.42
184	0	0	0	0	0	0	0	0	0	0	0	0.00701803	0.0102213	0.0148763	0.0216356	0.0314424	0.0456578	0.0662445	0.0960284	0.139073	0.201213	0.290812	0.419842	0.605402	0.871872	1.25394	1.80082	2.5822	2.68007	2.78115	2.88549	2.99316	3.10423	3.21876	3.33681	3.45844	3.5837	3.71263	3.84529	3.99277	4.14486	4.30162	4.4631	4.62935	4.70457	4.77958	4.85429	4.92859	5.05794
188	0	0	0	0	0	7.34203	32.4384	143.27	195.833	261.973	337.106	353.103	369.314	385.648	401.998	418.233	434.194	449.69	464.491	478.318	490.829	501.606	510.12	515.703	517.47	514.212	8.21611	20.5772	21.7429	22.9629	24.2384	25.5704	26.9595	28.4062	29.9106	31.4722	33.0904	34.7637	37.6846	40.7888	46.6524	53.9994	61.0064	67.5574	82.3849	101.602	119.02	146.507	175.868
191	0	0	0	0	0	9.4775	49.389	257.287	414.569	653.511	990.012	964.284	938.644	912.184	884.873	856.677	827.553	797.451	766.306	734.04	700.552	692.918	679.83	661.004	635.995	604.077	660.012	576.366	574.714	583.126	591.291	599.173	606.729	613.917	620.687	626.986	632.755	637.927	642.431	658.471	674.013	688.905	702.971	716	760.337	805.477	850.912	895.945	950.057
192	0	0	0	0	0	0	0	0	0	0	0	2.12651	2.56651	3.09457	3.72747	4.48497	5.39023	6.47032	7.75675	9.28605	11.1004	13.248	15.7841	18.7707	22.2777	26.3821	31.1681	36.726	42.0196	48.0669	54.9734	62.8592	71.8609	82.1338	93.8542	107.222	122.465	139.841	159.642	182.199	224.442	275.387	337.799	351.644	364.732	382.616	401.785	421.773	549.246
196	0	0	0	2.08464	10.2403	50.2873	246.865	304.392	285.463	373.298	457.473	445.393	432.77	419.609	405.918	391.706	376.986	361.773	346.084	279.074	219.615	200.791	207.097	220.587	148.914	177.539	94.5285	76.2176	74.4945	72.7906	71.1057	69.44	67.7934	66.1658	64.5574	62.9681	61.3978	59.8467	62.5558	65.0639	67.3752	69.4938	71.4241	77.2897	82.746	87.8017	92.4656	96.7466	109.387
203	0	0	0	0	0	10.2061	60.1231	354.058	645.443	1151.74	1977.76	1901.13	1824.8	1748.76	1672.97	1597.42	1522.07	1446.87	1371.76	1457.28	1523.77	1713.88	2131.73	2965.73	2275.8	2491.44	3366.37	2976.4	2988.51	2997.06	3002.07	3003.55	3001.5	2995.93	2986.84	2974.24	2958.11	2938.46	2915.27	2888.53	3280.11	3641.46	3695.26	3839.36	3994.86	4117.71	4187.43	4337.55	4565.49
204	0	0	0	0	0	4.69459	23.0462	113.097	182.923	295.641	477.443	532.173	592.831	659.997	734.298	816.41	907.054	1007	1117.07	1238.12	1371.06	1516.83	1676.4	1850.76	2009	2151.19	2139.36	1974.21	1797.82	1636.89	1490.09	1356.19	1234.08	1122.74	1021.22	928.684	844.345	767.488	697.462	643.572	593.696	547.543	504.842	465.342	466.73	467.984	469.097	470.063	476.107
208	0	0	0	0	0	0	0	0	0	2.16644	156.753	505.115	534.78	561.681	585.815	607.19	625.819	641.721	654.928	661.252	673.414	754.702	829.539	889.811	566.96	811.539	902.027	980.501	984.919	989.89	995.246	1001.05	1007.38	1030.05	1035.96	1041.2	1045.78	1049.71	1112.33	1172.3	1270.04	1330.42	1443.81	1604.41	1753.66	1897.32	2052.36	2247.61	2513.31
212	0	0	0	0	0	0	0	0	0	0	0	0.157909	0.18916	0.226221	0.270051	0.321728	0.38244	0.453477	0.536193	0.631957	0.742044	0.867479	1.00876	1.16541	1.33519	1.51276	1.68702	1.83529	2.08756	2.37303	2.69573	3.06016	3.47122	3.93431	4.45528	5.04049	5.69674	6.43127	7.25167	8.16576	9.1814	10.3062	11.2988	12.9298	13.5038	13.2055	8.91334	11.8451	13.4458
214	0	0	0	0	0	0	1.05336	3.87695	4.54976	5.30156	6.11892	7.41929	8.98959	10.8841	13.1674	15.9166	19.2231	23.1951	27.9608	33.6712	40.5039	48.6672	58.4046	69.9993	83.7799	100.125	46.8162	46.472	47.7157	48.9836	50.2755	51.5915	52.9312	54.2944	55.6809	57.0903	58.5221	59.9759	61.4511	64.7454	68.199	71.8179	75.6082	79.5762	102.567	132.16	171.12	220.081	275.577
218	0	0	0	0	0	54.3474	177.864	581.902	591.093	588.846	567.094	573.775	579.774	585.008	589.386	592.808	595.168	596.343	596.203	659.357	712.347	738.418	756.389	766.197	767.713	760.705	581.862	528.187	517.943	507.744	497.59	487.482	477.419	467.404	457.435	447.513	437.639	427.812	418.035	408.306	498.028	555.363	619.001	676.223	729.783	811.648	868.867	929.565	1055.17
222	0	0	0	0	0	6.69891	21.9237	71.7257	72.5611	71.8007	68.2464	71.4532	74.6965	77.9572	81.2119	84.4322	87.5839	90.6256	93.5073	96.1679	98.5324	100.507	101.975	102.782	102.723	101.509	98.6991	93.5543	92.2085	91.0931	90.2902	89.9136	90.1224	91.1391	93.2764	106.255	118.224	129.178	139.106	148	165.138	180.49	194.022	217.699	238.365	271.703	300.151	323.451	392.513
226	0	0	0	0	0	2.97462	10.952	40.3095	46.4641	52.7822	58.587	62.8236	67.2987	72.0154	76.9751	82.1767	87.6162	93.2865	99.1759	106.584	112.936	107.497	102.111	145.166	160.118	172.534	172.314	170.913	169.007	167.087	165.197	163.342	161.524	159.748	158.022	156.35	154.744	153.214	151.774	150.445	149.254	148.237	147.45	146.976	146.956	147.64	149.556	154.1	169.404
231	0	0	0	0	0	13.1403	54.1857	223.366	305.958	418.925	573.368	684.377	816.403	973.304	1159.62	1380.66	1642.67	1952.93	2319.96	2252.07	2184.21	2116.4	2048.62	1980.88	1913.19	1845.52	1777.9	1710.32	1724.25	1737.19	1749.13	1760.08	1770.04	1779	1786.96	1793.93	1799.91	1804.89	1808.88	1811.87	2496.89	3158.85	3797.74	4413.58	5006.35	5576.06	6122.72	6646.32	7226.29
232	0	0	0	0	0	1.29763	4.77763	17.5843	21.1689	25.4469	30.5399	32.0459	33.6061	35.2203	36.8878	38.6076	40.3783	42.1978	44.0637	45.0606	45.9107	51.0545	55.7515	63.4531	70.464	76.7886	83.0465	88.5778	88.9322	89.4846	90.1028	90.7951	91.5709	92.4418	93.4213	94.5257	95.7749	97.1935	98.8117	100.668	102.812	105.308	108.242	111.732	115.946	121.129	127.659	136.155	149.356
233	0	0	0	0	0	0	0	1.62705	6.38538	25.0504	98.2367	201.948	203.773	205.28	206.43	207.18	207.482	207.28	206.513	205.108	202.981	200.03	196.131	191.125	184.801	176.863	166.865	154.056	175.42	199.637	227.066	258.105	293.196	332.829	377.541	427.923	484.619	548.33	619.809	685.579	757.45	835.795	920.954	1013.22	1012.64	1010.08	1005.29	997.955	998.677
234	0	0	0	0	0	0	0	0	0	0	0	0.0816968	0.0799208	0.0780574	0.0761031	0.0740538	0.0719051	0.0696514	0.0672864	0.0648023	0.0621894	0.0594353	0.0565236	0.053432	0.0501287	0.0465663	0.0426694	0.0383058	0.046753	0.0570333	0.0695359	0.0847303	0.103182	0.12557	0.152711	0.185582	0.225352	0.273416	0.331432	0.401369	0.485552	0.586719	0.708077	0.853361	1.02689	1.23359	1.47908	1.76956	2.13527
238	0	0	0	0	0	0	0	0	0	0	0	0	0	0	0	0	0	0	0	0	0	0	0	0	0	0	0	0	0	0	0	0	0	0	0	0	0	0	0	0	0	0	0	0	0	0	0	0	0
242	0	0	0	0	0	0	0	0	0	7.16853	7.78127	8.31702	8.87825	9.46426	10.0739	10.7054	11.3564	12.0237	12.703	13.3889	14.0745	14.751	15.4072	16.029	16.5985	17.0924	17.4804	17.7213	18.2984	18.889	19.4929	20.1099	20.74	21.383	22.0384	22.7062	23.3858	24.0768	24.7787	25.5619	26.3589	27.1692	27.992	28.8265	29.0793	29.3197	29.9628	30.5378	39.5627
246	0	0	0	0	0	0	0	0	2.12349	5.83142	32.669	47.8505	61.0046	72.7724	83.1579	92.1623	99.7831	106.012	110.835	128.762	143.239	153.925	161.648	166.605	138.518	126.126	228.563	412.06	441.548	473.037	506.654	542.528	580.799	621.612	665.12	711.483	760.87	813.455	927.239	1053.43	1273.22	1398.32	1631.11	1771.46	1952.68	2013.93	2195.58	2363.19	2583.46
250	0	0	0	0	383.782	490.197	929.733	1754.61	4101.69	7586.82	17124.6	19048.5	20783	17736	14860.5	13579.3	12355	12496.9	12580.9	13801.8	14847.7	16796	21510.9	30888.4	19934.4	25287.7	28759.2	31201.9	31387.2	31540.1	31660.5	31748.1	31803	31824.7	31813	31767.7	31688.4	31574.6	32694.9	33491.8	33779.9	34110.3	34340.9	33253.4	32078.7	31397.1	30255.4	28626.8	27477.5
254	0	0	0	0	0	0	0	0	0	0	0	1.19379	1.24775	1.30196	1.35601	1.40941	1.46159	1.51183	1.55928	1.60288	1.64134	1.67306	1.69598	1.70743	1.70378	1.67989	1.62779	1.53375	1.6597	1.79473	1.93925	2.09371	2.25848	2.4339	2.62022	2.81763	3.02616	3.24567	3.47582	3.71593	3.96498	4.22141	4.483	4.7466	5.00784	5.26063	5.4964	5.70287	5.92713
258	0	0	0	0	0	0	0	0	0	0	0	0.0419992	0.0603835	0.0866731	0.124186	0.177582	0.253382	0.36065	0.511911	0.724323	1.02114	1.43343	2.00187	2.77817	3.82481	5.21037	6.99327	9.17495	9.42255	9.67126	9.9205	10.1696	10.4178	10.6643	10.908	11.148	11.383	11.6116	11.8322	12.0766	12.3105	12.5314	12.7365	12.9226	12.8245	12.6988	12.5421	12.3501	12.2522
262	0	0	0	0	0	0	0	0	0	0	0	0	0	0	0	0	0	0	0	0	0	0	0	0	0	0	0	0	0	0	0	0	0	0	0	0	0	0	4.07569	3.98638	3.89643	3.80572	3.71412	3.62147	3.52758	3.4322	3.33507	3.23589	3.16925
266	0	0	0	0	0	0	1.43278	6.32813	8.91771	12.4809	17.3082	19.1906	21.2627	23.5409	26.043	28.7874	31.7936	35.0817	38.6729	42.5885	46.8502	51.4799	56.4989	61.9275	67.7849	74.0878	80.8499	88.0809	88.5954	88.1222	87.6702	87.2417	86.8397	86.4673	86.1287	85.8284	85.5722	85.3668	85.2208	85.1445	85.1512	85.2577	85.4864	85.8668	86.44	87.2641	88.426	90.0615	93.4267
268	0	0	0	0	18.015	61.9265	212.802	731.014	776.288	806.181	803.826	826.444	848.388	869.448	889.385	907.922	924.741	939.472	951.681	947.354	936.742	1312.98	1626.84	1878.49	1373.57	1553.43	1654.75	1669.24	1034.88	1091.17	1149.66	1210.29	1273.02	1337.73	1404.3	1472.53	1542.18	1612.95	1684.43	1756.13	1827.4	1897.46	1965.29	2029.6	2088.73	2140.55	2182.17	2209.69	2242.19
270	0	0	0	0	0	0	0	0	0	0	0	0.508054	0.564967	0.627856	0.697278	0.773833	0.858159	0.950932	1.05287	1.16472	1.28726	1.42131	1.56768	1.72722	1.90074	2.08905	2.2929	2.51297	2.23797	1.9927	1.77398	1.57895	1.40509	1.25012	1.11201	0.988937	0.879292	0.781624	0.694639	1.02532	1.51304	2.23218	3.29224	4.85435	7.15562	10.5447	15.5341	22.877	34.054
275	0	0	0	7.43947	29.2358	114.855	451.067	444.943	333.819	349.226	342.379	326.982	311.459	295.829	268.191	242.308	218.102	195.499	174.427	154.817	136.603	119.719	104.105	89.7015	76.4506	64.2975	53.1895	43.0754	46.454	50.0747	53.9522	58.1017	62.539	67.2802	72.342	77.7415	83.4961	89.6235	92.7076	95.8367	99.0058	102.209	105.441	108.695	105.553	102.42	99.2967	96.1842	94.1183
276	0	0	0	0	0	11.9799	35.1715	96.898	284.65	836.292	6053.6	5337.13	4674.58	3796.28	3080.85	2317.51	1731.81	1684.36	3273.83	6357.88	7710.11	11956.6	18812.7	22394.9	11494	14352.7	15088.1	13308.8	12994.4	12683.7	12376.6	12073.3	15809.3	15612.2	15414.3	15215.6	15016	15728.6	15515	15300.5	15085.1	14868.8	17422.5	17145.6	16868.3	16590.5	16312.3	17745.1	17596.1
288	0	0	0	0	0	4.58138	20.2414	89.3994	131.256	192.635	282.603	315.299	351.574	391.783	436.31	485.57	540.008	600.097	666.344	739.282	819.473	907.502	1003.97	1109.51	1224.73	1350.24	1486.66	1634.52	1625.69	1617.16	1608.96	1601.13	1593.72	1586.78	1580.38	1574.6	1569.52	1565.27	1561.98	1559.82	1559.01	1559.82	1562.62	1567.9	1576.32	1588.82	1606.82	1632.5	1688.11
292	0	0	0	0	0	0	0	0	0	0	0	0	0	0	0	0	0	0	0	0	0	0	0	0	0	0	0	0	0	0	0	0	0	0	0	0	0	0	0	0	0	0	0	0	0	0	0	0	0
296	0	0	0	0	0	0	0	0	0	0	0	0	0	0	0	0	0	0	0	0	0	0	10.6118	11.4354	12.3086	13.2318	14.2051	15.228	15.8199	16.4318	17.0642	17.7174	18.3921	19.0885	19.8071	20.5484	21.3126	22.1002	22.9114	23.8126	24.743	25.703	26.6931	27.7137	28.1907	28.6675	29.1433	29.6175	30.4238
300	0	0	0	0	16.1571	30.5164	59.9232	117.627	346.223	1131.88	2219.38	2167.16	2114.93	1804.87	1507.87	1126.01	762.421	787.879	810.725	830.961	848.585	888.273	931.746	962.818	669.729	718.033	1037.88	998.719	1029.86	1059.79	1088.52	1116.06	1142.39	1167.52	1191.44	1214.17	1235.7	1256.02	1275.14	1293.06	1394.73	1503.82	1621.39	1747.31	1882.97	2048.87	2228.18	2422.76	2578.67
304	0	0	0	0	0	0	0	0	0	0	0	0	0	0	0	0	0	0	0	0	0	0	0	0	0	0	0	0	0	0	0	0	0	0	0	0	0	0	0	0	0	0	0	0	0	0	0	0	0
308	0	0	0	0	0	0	0	0	0	2.23827	3.98059	4.19163	4.40948	4.63377	4.86401	5.09961	5.33982	5.58374	5.83029	6.07818	6.32588	6.5716	6.81326	7.04843	7.27429	7.48758	7.68452	7.86074	8.36903	8.90836	9.48045	10.0871	10.7302	11.4117	12.1336	12.8982	13.7074	14.5638	15.4696	15.6889	15.9068	16.1232	16.3377	16.5499	16.7783	17.0042	17.2274	17.4474	17.8601
312	0	0	0	0	0	0	0	1.79228	3.28323	5.90512	10.2944	10.8092	11.3358	11.8723	12.4166	12.9658	13.5166	14.0653	14.6069	15.1361	15.646	16.1288	16.5751	16.9735	17.3103	17.5686	17.7276	17.76	18.864	20.0314	21.2653	22.569	23.9458	25.3993	26.9328	28.55	30.2546	32.0505	33.9413	34.316	34.6821	35.0389	35.3857	35.7214	36.0853	36.4371	36.7759	37.1004	37.8253
316	0	0	0	0	0	0	0	0	0	0	0	0.373513	0.448002	0.536533	0.641502	0.765627	0.91196	1.08388	1.28507	1.51941	1.79086	2.10322	2.45966	2.86211	3.31008	3.79884	4.31615	4.83625	4.98291	5.13207	5.28361	5.4374	5.59328	5.75106	5.91055	6.07151	6.23369	6.39679	6.5605	6.74312	6.92655	7.11033	7.29397	7.4769	7.50559	7.5282	7.54424	7.55323	7.63854
320	0	0	0	0	0	40.367	132.11	432.213	437.667	433.771	413.614	433.267	453.186	473.264	493.368	513.338	532.983	552.07	570.319	807.663	1013.16	1012.63	1003.29	984.803	956.617	917.851	619.304	637.316	614.176	591.584	569.526	547.991	526.966	506.439	486.398	466.83	447.722	429.064	410.841	393.04	429.783	467.913	508.85	557.743	601.836	629.422	636.784	643.028	689.91
324	0	0	0	0	0	2.06246	9.11233	40.2461	57.2688	81.1533	114.41	127.101	141.108	156.553	173.567	192.286	212.858	235.438	260.186	287.272	316.871	349.159	384.319	422.527	463.958	508.778	557.137	609.163	605.534	602.018	598.628	595.38	592.289	589.378	586.668	584.19	581.976	580.069	578.519	577.388	576.757	576.728	577.432	579.048	581.821	586.098	592.393	601.513	621.643
328	0	0	0	0	0	0	0.457035	2.69143	4.92945	8.86342	15.4434	18.579	22.3236	26.7873	32.0974	38.4006	45.8643	54.678	65.054	77.2269	91.4509	95.0351	97.6365	106.89	114.154	119.418	110.385	112.269	115.451	118.692	121.99	125.345	128.756	132.22	135.735	139.301	142.914	146.571	150.27	154.744	159.292	163.911	168.598	173.347	183.35	193.846	204.848	216.372	230.97
332	0	0	0	0	0	0	0	0	0	0	0	1.80967	2.60179	3.7345	5.35074	7.65129	10.917	15.5383	22.0548	31.2053	43.9912	61.7503	86.2337	119.666	164.734	224.382	39.8939	43.6028	53.1734	64.8072	78.938	96.0875	116.882	142.072	172.556	209.402	253.886	307.518	372.081	449.674	490.719	506.967	522.933	559.353	590.968	602.715	649.027	696.759	774.534
334	0	0	0	0	0	0	0	0	0	0	0	0	0	0	0	0	0	0	0	0	0	0	0	0	0	0	0	0	0	0	0	0	0	0	0	0	0	0	0	0	0	0	0	0	0	0	0	0	0
336	0	0	0	0	0	0	0	0	0	0	0	0	0	0	0	0	0	0	0	0	0	0	0	0	0	0	0	0	0	0	0	0	0	0	0	0	0	0	0	0	0	0	0	0	0	0	0	0	0
340	0	0	0	0	0	10.6662	34.9076	114.204	116.59	117.073	114.401	137.82	165.847	199.336	239.282	286.841	343.347	410.332	489.54	582.944	692.745	821.369	971.441	1145.73	1347.05	1578.09	420.838	111.689	113.574	115.464	117.359	119.257	121.156	123.054	124.949	126.84	128.725	130.601	132.466	134.318	250.695	286.501	327.314	356.73	375.939	396.04	417.06	439.026	467.097
0	0	0	0	0	0	0	0	0	0	0	0	0	0	0	0	0	0	0	0	0	0	0	0	0	0	0	0	0	0	0	0	0	0	0	0	0	0	0	0	0	0	0	0	0	0	0	0	0	0
348	0	0	0	0	0	25.9012	101.721	399.35	730.15	981.883	850.93	818.316	785.919	753.736	721.763	574.995	438.948	522.532	595.829	753.037	889.772	1006.11	1259.51	1839.96	1369.35	1582.73	1452.44	1583.78	1720.44	1850.6	1974.29	2091.57	2202.49	2307.09	2405.42	2497.53	2583.48	2663.31	2737.07	2804.82	3093.79	3365.79	3490.75	3561.53	3663.38	3831.04	4022.47	4324.37	4630.67
352	0	0	0	0	0	0	0	0	0	2.04615	3.50046	3.42804	3.352	3.27218	3.18844	3.10057	3.00838	2.91161	2.80995	6.62242	12.439	16.2824	15.1424	13.9891	10.9837	9.94751	7.38641	6.35695	6.32239	6.28395	6.24143	6.19462	6.14332	6.08728	6.02623	5.95988	5.88792	5.80997	5.72564	5.75183	5.76892	5.77569	5.77071	5.75231	5.54518	5.32848	5.10069	4.85977	4.65406
356	0	0	0	4106.1	7227.85	12718.9	22374.2	39345.5	69165.4	121541	213495	198996	184953	171441	158515	146210	134549	123541	113189	103485	94416.2	85965	78110	70827.2	64090.7	57873.5	52147.6	55755.3	59152.6	62745.4	66543.9	70558.8	74801.1	79282.3	84014.3	89009.4	94280.6	99841	105704	111885	118396	125255	132474	132143	131774	131435	131036	130569	131479
360	0	0	0	0.258936	0.317992	8.66664	11.7649	15.9722	127.219	257.508	409.27	482.898	565.755	658.751	762.86	879.118	1008.62	1152.53	1312.04	1488.43	1682.98	2013.83	2383.21	2794.02	3824.02	4721.79	5162.5	5694.48	5793.57	5892.67	5991.7	6090.58	6189.24	6536.59	6886.34	7238.25	7592.07	7947.53	7869.97	7769.36	7648.66	7510.57	7357.55	8785.27	9999.15	11019.2	11864	13923.4	16076.9
364	0	0	11.5298	47.3693	381.424	2120.45	10930	11551.7	8450	8160	12000	11948.3	11865.3	11752.6	11611.7	11444	11251.1	9717.33	8298.9	8236.84	8144.76	8109.81	8038.45	5288.61	5315.07	5306.61	6194.66	5770.95	5915.27	5939.02	5961.69	5983.22	6003.57	6022.7	6040.54	6057.07	6072.21	6085.93	6098.16	6108.85	6330.12	6538.83	6735.1	6919.03	7090.75	8008.31	8882.08	9472.86	10142.4
368	0	0	7.36304	24.1416	79.1635	424.09	3747.41	4620.67	4550	5100	3000	3000.94	2991.46	2842.87	2698.06	2440.8	2199.81	3637.34	4901.48	4153.83	3470.28	2848.25	2094.74	1422.76	1325.51	1231.7	1426.67	1054.41	1036.2	1018.1	1000.11	982.231	964.464	946.808	929.263	911.829	894.506	877.294	905.314	933.983	963.299	993.257	1023.85	1055.07	1180.08	1319.48	1474.86	1647.98	1861.22
372	0	0	0	0	0	3.25764	19.1904	113.01	205.346	364.425	618.89	605.374	591.167	576.24	560.554	544.067	526.73	508.482	489.248	485.084	477.438	591.934	819.937	1000.58	678.528	803.625	1083.59	1766.31	2083.57	2076.18	2064.64	2048.37	2026.67	1945.88	1860.87	1981.34	2232.8	2252.87	2393.39	2563.43	2484.22	2667.06	1779.43	1573.73	1525.2	1248.09	1102.78	1017.44	982.8
376	0	0	0	0	43.5455	192.456	850.304	943.605	796.434	937.342	1033.83	1449.09	2025.87	2824.21	1962.51	1359.12	937.755	644.361	440.731	366.546	300.569	278.289	255.415	232.088	147.139	158.256	133.986	88.8902	94.0107	98.7127	103.007	106.902	110.41	113.541	116.304	118.71	120.768	122.49	123.153	124.964	126.72	128.415	130.041	131.593	129.156	126.664	124.12	121.522	120.195
380	0	0	0	26.8391	57.6806	101.214	248.83	615.116	2520.24	6188.27	29704.2	26293.2	23166.6	20305.6	17692.4	11113.8	5239.48	7369.13	9205.5	9694.54	10477.5	12237.6	14938	20483.7	12209.9	12777.8	17506.4	16494.7	16172.4	15910.8	15650.4	15391.3	15133.5	14877	14621.8	14367.9	14115.2	13863.7	13613.6	13364.6	13520	13673.8	13825.9	13975.4	13560.3	13633	13814.2	13911.6	14238.3
384	0	0	0	0	0	5.18528	21.3822	88.1423	124.535	175.503	246.768	276.025	308.565	344.726	384.872	429.397	478.725	533.311	593.641	660.23	733.624	814.394	903.133	1000.45	1106.96	1223.3	1350.05	1487.79	1478.25	1468.92	1459.83	1451	1442.46	1434.27	1426.47	1419.1	1412.25	1405.99	1400.43	1395.68	1391.9	1389.3	1388.13	1388.75	1391.62	1397.43	1407.17	1422.39	1461.74
388	0	0	0	0	0	0	0	0	0	0	0	0.0122332	0.0235323	0.0452103	0.0867395	0.166172	0.317837	0.606874	1.15657	2.1996	4.17369	7.89932	14.9079	28.044	52.5597	98.0838	45.5275	21.0032	24.0683	27.5738	31.5821	36.1636	41.3988	47.3789	54.2076	62.0026	70.8973	81.043	92.6113	93.1335	93.6269	94.0902	94.5217	94.9198	105.146	116.427	128.865	0	25.7131
392	0	0	0	0	0	0	11.9872	52.9436	72.4266	97.0182	125.174	200.397	269.106	404.993	528.007	755.818	959.738	1315.59	1562.65	1891.76	1835.29	1838.12	1438.67	1524.62	1792.6	2169.54	2712.88	3792.87	4028.7	3938.13	3847.88	3757.95	3668.34	3554.36	3441.9	3330.96	3221.53	3113.59	3115.28	3112.39	3104.92	3092.86	3076.21	3089.75	3096.44	3208.4	3373.98	3635.99	3983.89
398	0	0	0	0	0	0	1.8894	2.31801	2.84284	3.48521	4.27109	5.21325	6.35953	7.75313	9.44607	11.5009	13.9928	17.0117	20.6657	25.0833	30.4182	36.8528	44.6036	53.9265	65.1231	78.5476	94.6142	113.805	140.359	173.078	213.384	263.025	324.151	399.4	492.015	605.974	746.162	918.571	1130.55	1391.11	1711.28	2104.6	2587.62	3180.62	3908.39	4801.25	5896.27	7238.73	8982.6
400	0	0	0	11.4861	43.2032	162.599	612.327	579.744	417.884	420.429	396.797	535.314	720.695	968.128	693.968	496.168	353.76	251.464	178.159	150.484	125.599	118.074	110.357	102.488	66.7692	74.9727	66.2135	45.9282	45.931	44.9414	43.9602	42.9876	42.0236	41.0682	40.1215	39.1837	38.2547	37.3346	36.4235	35.5214	36.3781	37.2409	38.1086	38.9803	39.8549	48.368	58.6727	71.1392	87.1704
404	0	0	0	0	0	4.64058	17.2167	63.9953	79.1841	98.1593	121.905	148.746	181.392	221.068	269.249	327.71	398.58	484.413	588.263	666.191	738.386	840.625	934.849	1021.07	1099.28	1169.51	1314.37	1444.96	1459.75	1456.36	1453.43	1451	1449.15	1447.94	1447.48	1447.86	1449.22	1451.71	1455.53	1460.91	1468.17	1477.69	1489.99	1505.76	1525.97	1551.98	1585.87	1630.89	1711.39
408	0	0	0	0	0	9.75964	35.9332	132.254	150.604	167.811	179.778	220.801	270.781	331.534	405.195	494.255	601.581	730.439	884.478	938.873	980.778	1101.87	1368.54	950.243	1018.4	1058.29	1185.83	1300.35	1394.09	1431.52	1469.1	1506.75	1544.36	1581.83	1619.01	1655.78	1691.96	1727.37	1761.81	1795.03	1765.98	1713.77	1660.81	1607	1552.26	1495.71	1446.05	1394.51	1355.71
410	0	0	0	0	0	9.75198	35.905	132.15	150.361	167.308	178.742	235.761	310.49	408.217	535.714	701.598	916.761	1194.86	1552.83	1646.22	1717.06	1925.41	2385.76	1651.5	1762.74	1821.24	2022.93	2185.56	2340.81	2441.11	2543.79	2648.65	2755.44	2863.85	2973.49	3083.91	3194.53	3304.68	3413.53	3520.09	3421.88	3286.79	3149.24	3035.44	2915.38	2772.15	2622.33	2464.35	2356.56
414	0	0	0	0	0	0	0	0	0	0	0	0	0	0	0	0	0	0	0	0	0	0	0	0	0	0	0	0	0	0	0	0	0	0	0	0	0	0	78.6702	76.4448	74.1371	71.7383	69.2375	66.6207	63.8701	60.9619	57.8636	54.5292	51.4553
417	0	0	0	0	8.32713	28.6245	98.3642	337.899	362.466	382.59	393.317	406.254	419.158	431.969	444.617	457.026	469.109	480.767	491.893	489.259	484.833	497.046	505.557	510.407	511.631	509.255	544.101	569.703	591.669	613.909	636.841	660.476	684.825	709.897	735.702	762.247	789.54	817.585	846.387	875.948	906.269	937.35	969.187	1001.78	1035.11	1069.17	1103.95	1139.44	1188.67
418	0	0	0	0	0	0	8.91869	32.8257	30.2237	31.9953	37.5576	39.3802	41.2775	43.2491	45.2943	47.4119	49.6	51.8565	54.1783	61.7586	68.788	75.2681	81.2001	86.5849	91.4233	95.7157	115.271	133.083	133.495	133.848	134.141	134.376	134.551	134.668	134.725	134.723	134.662	134.542	147.609	160.204	172.325	183.972	195.147	205.848	216.075	225.648	248.941	272.813	276.698
422	0	0	0	0	12.1893	50.2811	207.341	854.705	1089.19	1357.42	1624.29	1775.17	1937.07	2110.18	1795.72	1525	1292.15	1092.08	920.319	816.266	718.378	708.866	693.689	672.506	491.758	476.374	494.42	366.03	338.335	322.867	307.875	293.344	279.258	265.6	252.355	239.506	227.036	214.929	203.167	191.732	200.42	205.88	210.973	215.575	219.534	248.088	236.011	245.681	232.792
426	0	0	0	0	0	0	0	0	0	0	0	0	0	0	0	0	0	0	0	0	0	0	0	0	0	0	0	0	0	0	0	0	0	0	0	0	0	0	66.3259	68.7137	71.4588	74.6482	78.4006	82.882	88.3331	95.1175	103.814	115.406	133.193
428	0	0	0	0	0	0	0	2.22283	8.72357	34.2233	134.209	275.897	278.288	280.232	281.673	282.549	282.792	282.323	281.053	278.876	275.669	271.283	265.531	258.171	248.878	237.182	222.347	203.082	230.899	262.354	297.884	337.973	383.148	433.987	491.113	555.196	626.949	707.121	796.486	877.541	965.254	1059.77	1161.08	1269	1344.62	1419.99	1493.53	1563.06	1643.55
430	0	0	0	0	0	2.978	13.1574	58.1116	86.1877	127.759	189.276	194.692	200.147	205.629	211.125	216.621	222.102	227.551	232.947	238.271	243.5	248.606	253.564	258.343	262.908	267.225	271.252	274.948	273.765	272.641	271.582	270.596	269.693	268.884	268.182	267.602	267.162	266.886	266.8	266.94	267.349	268.082	269.212	270.838	273.093	276.171	280.356	286.098	297.421
434	0	0	0	0	50.5446	223.389	986.973	1095.27	924.444	1088	1200	1332.83	1461.06	1296.37	1135.19	1173.29	1208.94	1242.02	1272.45	1274.13	1274.02	872.99	487.781	714.597	929.405	1131.74	1100.93	1069.35	982.503	976.732	970.768	964.61	958.257	951.709	944.965	938.026	930.89	923.557	916.026	977.328	971.235	964.853	958.183	951.222	943.971	936.428	975.098	1093.63	1130.1
438	0	0	0	0	0	1.21223	4.08066	13.7317	14.2891	14.5441	14.2208	13.927	13.6185	13.2948	12.9551	12.5987	12.2248	11.8324	11.4201	10.9866	10.5299	10.0476	9.53648	8.99192	8.40742	7.77296	7.07199	6.2741	6.27298	6.26786	6.25851	6.24467	6.22604	6.20233	6.1732	6.13828	6.09716	6.04939	5.99447	5.93184	5.86083	5.7807	5.69058	5.58942	5.47598	5.34873	5.20574	5.04454	4.91584
440	0	0	0	0	0	0	0.67541	2.65161	10.4063	40.8248	160.097	329.116	332.46	335.334	337.681	339.439	340.537	340.9	340.439	339.057	336.641	333.061	328.159	321.746	313.584	303.359	290.639	274.783	313.865	358.373	409.038	466.681	532.228	606.721	691.331	787.374	896.322	1019.83	1159.73	1291.19	1436.7	1597.63	1775.43	1971.65	2127.2	2293.25	2470.23	2658.55	2890.32
442	0	0	0	0	0	2.74245	12.1166	53.5151	73.0835	97.6209	125.244	122.652	119.929	117.072	114.074	110.928	107.628	104.163	100.523	96.6948	92.6612	88.4005	83.8834	79.0692	73.899	68.2824	62.0692	54.9819	56.6482	58.327	60.0137	61.7033	63.39	65.0671	66.7269	68.3605	69.958	71.5075	72.9955	78.4745	84.2282	90.2392	96.4793	102.906	99.1655	100.407	100.89	100.555	100.421
446	0	0	0	0	0	0	0	0	0	0	0	0	0	0	0	0	0	0	0	0	0	0	0	0	0	0	0	0	0	0	0	0	0	0	0	0	0	0	0	0	0	0	0	0	0	0	0	0	0
450	0	0	0	0	0	0	0	0	0	0	0	0.829122	1.6155	3.14576	6.12156	11.9042	23.1328	44.9184	87.1509	126.71	163.609	224.242	280.472	332.321	379.812	480.123	560.763	633.639	636.936	637.184	637.709	638.544	639.729	641.309	643.341	645.889	649.033	652.871	657.522	663.136	669.904	678.074	687.971	700.038	714.891	733.419	756.966	787.681	838.485
454	0	0	0	0	0	1.14888	4.24312	15.6687	18.8475	22.6294	27.1129	32.2686	38.3815	45.6235	54.196	64.3341	76.3125	90.4509	107.121	121.926	135.554	157.183	177.018	195.071	211.357	225.89	235.431	243.514	244	245.223	246.611	248.184	249.966	251.985	254.275	256.876	259.838	263.221	267.101	271.571	276.753	282.806	289.94	298.445	308.727	321.382	337.326	358.047	390.469
458	0	0	0	0	0	0	0.832687	3.06475	3.71854	4.53857	5.55537	8.13658	11.9103	17.4236	25.473	37.216	54.3341	79.2667	115.549	118.431	120.941	140.194	157.987	174.322	189.197	202.615	244.057	281.816	287.701	293.326	298.69	303.794	308.637	313.219	317.541	321.602	325.402	328.942	340.075	350.702	360.824	370.439	379.548	485.188	587.033	685.068	1030.95	1126.61	1429.08
462	0	0	0	0	0	0	0	0	0	0	0	0.011208	0.0161084	0.0231126	0.0331014	0.0473105	0.0674661	0.0959644	0.136108	0.192409	0.270958	0.379846	0.529582	0.733343	1.00666	1.36566	1.82143	2.36407	2.34564	2.32575	2.30432	2.2813	2.25658	2.23009	2.20172	2.17136	2.13889	2.10416	2.06701	2.09515	2.11983	2.14039	2.15606	2.16589	2.28919	2.4101	2.52523	2.62983	2.74719
466	0	0	0	0	0	3.75149	16.5748	73.2052	103.925	146.839	206.241	229.018	254.144	281.833	312.313	345.828	382.635	423.004	467.219	476.189	483.509	500.85	515.713	537.418	573.349	595.404	665.113	726.694	729.222	726.919	724.839	723.007	721.455	720.218	719.34	718.872	718.875	719.423	720.61	722.55	725.388	729.311	734.566	741.482	750.518	762.327	777.89	798.755	836.75
470	0	0	0	0	0	0	0	0	0	0	0	0.938156	1.12786	1.3542	1.62373	1.94402	2.32376	2.77285	3.30244	3.92496	4.65408	4.40359	4.15458	7.81374	3.66019	6.82837	12.6733	20.4533	20.6627	20.8529	21.0243	21.1768	21.3107	21.9488	22.5483	23.1096	23.633	24.1189	25.0399	25.9043	26.7125	33.3157	32.2422	32.3619	32.0823	31.4228	30.403	29.0424	29.3625
474	0	0	0	0	0	0	0	0	0	0	0	0.00362072	0.0069407	0.0132831	0.0253756	0.0483806	0.0920394	0.174666	0.330552	0.623586	1.1721	2.19363	4.08439	7.55686	13.8698	25.1872	11.2652	4.92409	5.60442	6.37505	7.2472	8.23329	9.34709	10.6037	12.0198	13.6134	15.4042	17.4134	19.6635	19.6655	19.6423	19.5913	19.5096	19.3939	19.9276	20.4293	20.8883	21.2916	21.8627
478	0	0	0	0	0	1.59255	6.25438	24.5542	30.8883	38.6399	47.9898	53.2571	59.0626	65.4546	72.4846	80.2069	88.6792	97.9617	108.117	110.104	111.704	115.61	118.933	127.055	132.956	136.911	152.78	166.741	166.184	164.911	163.664	162.447	161.263	160.116	159.011	157.954	156.952	156.012	155.145	154.365	153.685	153.128	152.719	152.494	152.5	152.807	153.514	154.778	158.604
480	0	0	0	0	0	0	0	0	0	0	0	0.0868126	0.111156	0.142122	0.181434	0.231231	0.294153	0.37344	0.473038	0.597704	0.753104	0.945881	1.18364	1.47482	1.82824	2.25229	2.75307	3.33096	4.08166	4.99999	6.12297	7.49567	9.17297	11.2216	13.7227	16.7749	20.4978	25.0368	30.5677	37.304	45.5039	46.0765	44.4967	54.5314	54.7097	60.2862	60.657	59.2487	58.0737
484	0	0	0	0	0	76.9103	243.959	650.812	3992.7	5003.49	6397.9	6724.4	7063.47	7415.13	7779.3	8155.87	8544.58	8945.12	9357.01	10681.6	11970.3	13416.7	14814.9	16160	17447.4	18671.9	734.377	2884.24	3147.45	3413.46	3682.15	3953.37	4226.98	4502.82	4780.72	5060.49	5341.94	5624.86	5909.05	6194.26	6480.25	6766.77	7053.55	7340.3	7626.72	7910.04	9550.79	11305.4	12928.7
492	0	0	0	0	0	0	0	0	0	0	0	0	0	0	0	0	0	0	0	0	0	0	0	0	0	0	0	0	0	0	0	0	0	0	0	0	0	0	0	0	0	0	0	0	0	0	0	0	0
496	0	0	0	0	0	0	0	0	531.185	691.958	903.738	900.233	896.225	891.696	886.627	881	874.795	867.992	860.572	863.326	863.815	1077.63	1271.49	1293.73	873.531	834.535	796.226	758.594	736.965	722.216	707.628	693.202	678.935	664.826	650.873	637.076	623.432	609.94	596.599	583.407	573.575	568.206	562.737	557.165	551.49	551.036	589.609	630.682	681.885
498	0	0	0	0	0	27.6815	95.1237	326.768	347.315	361.227	361.249	371.589	381.656	391.36	400.599	409.255	417.195	424.261	430.273	435.017	436.295	612.767	856.318	792.912	728.554	883.552	990.493	1159.45	746.228	788.698	833.11	879.495	927.87	978.244	1030.61	1084.95	1141.21	1199.32	1259.2	1320.7	1383.64	1447.81	1512.91	1578.58	1644.36	1709.68	1773.83	1835.91	1915.84
[truncated: 98 more rows]
[truncated: 107 more columns]

## Sheet: 2grid
ISO1	y-10000	y-9000	y-8000	y-7000	y-6000	y-5000	y-4000	y-3000	y-2000	y-1000	y0	y100	y200	y300	y400	y500	y600	y700	y800	y900	y1000	y1100	y1200	y1300	y1400	y1500	y1600	y1700	y1710	y1720	y1730	y1740	y1750	y1760	y1770	y1780	y1790	y1800	y1810	y1820	y1830	y1840	y1850	y1860	y1870	y1880	y1890	y1900	y1910
[truncated: 234 more rows]
[truncated: 29 more columns]

## Sheet: lower2grid
ISO1	y-10000	y-9000	y-8000	y-7000	y-6000	y-5000	y-4000	y-3000	y-2000	y-1000	y0	y100	y200	y300	y400	y500	y600	y700	y800	y900	y1000	y1100	y1200	y1300	y1400	y1500	y1600	y1700	y1710	y1720	y1730	y1740	y1750	y1760	y1770	y1780	y1790	y1800	y1810	y1820	y1830	y1840	y1850	y1860	y1870	y1880	y1890	y1900	y1910
[truncated: 234 more rows]
[truncated: 29 more columns]

[truncated: 2 more sheets: upper2grid, spread_of_agric]
