# Supplementary material for: New anthropogenic land use estimates for the Holocene; HYDE 3.2
Source: Copernicus journal article supplement (doi:10.5194/essd-2016-58), 2016-12-07
Supplement: Supplementary file 9 [file Table S4.xlsx]

## Sheet: Note
Total harvested rice area estimate
Sheetname
data	= baseline (or best estimate) data
lower	= baseline data * first lower uncertainty ratio estimate
upper	= baseline data * first upper uncertainty ratio estimate
lower2	= baseline data * second lower uncertainty ratio estimate
upper2	= baseline data * upper lower uncertainty ratio estimate
2grid	= for export of baseline data to .csv file for computional grid
lower2grid	= for export of lower estimate to .csv file for computional grid
upper2grid	= for export of upper estimate to .csv file for computional grid
for paper	= HYDE 3.2 results and literature estimates

## Sheet: data
Total harvested rice area estimate, in 1000 ha			0.075	initial ha crop/cal value					Rice area can be greater than irrigated area!!! => rainfed							Rice was not native to the Americas, until European Settlement							African rice has been cultivated for 3500 years. Between 1500 and 800 BC, Oryza glaberrima propagated from its original centre, the Niger River delta, and extended to Senegal.																										many data for 1890 - 1950 from Mitchell
NO double cropping included in these original input areas!
IM22	ISO1	Country	-10000	-9000	-8000	-7000	-6000	-5000	-4000	-3000	-2000	-1000	0	100	200	300	400	500	600	700	800	900	1000	1100	1200	1300	1400	1500	1600	1700	1710	1720	1730	1740	1750	1760	1770	1780	1790	1800	1810	1820	1830	1840	1850	1860	1870	1880	1890
18	4	Afghanistan	0	0	3.00437e-05	6.23985e-05	0.000129597	0.000269163	0.00164862	0.00434025	0.00931134	0.0181685	0.0545054	0.0919779	0.153296	0.229945	0.344917	0.517376	0.776064	1.12917	1.64137	2.40968	3.53594	5.59857	8.83985	9.28184	14.9172	23.8676	44.7517	67.1276	68.3724	69.5021	70.6424	71.7929	72.9533	74.1231	75.3017	76.4885	77.6829	78.8842	80.0916	81.3043	83.3643	87.3125	91.4306	95.7243	100.199	106.42	114.276
12	8	Albania	0	0	0	0	0	0	0	0	0	0	0	0	0	0	0	0	0	0	0	0	0.368442	0.368442	0.368442	0.368442	0.368442	0.368442	0.368442	0.552663	0.573695	0.594727	0.615759	0.636791	0.657823	0.678855	0.699887	0.720918	0.74195	0.762982	0.784014	0.805046	0.818844	0.868471	0.921105	1.01598	1.11085	1.22415	1.33744
7	12	Algeria	0	0	0	0	0	0	0	0	0	0	0	0	0	0	0	0	0	0	0	0	0	0	0	0	0	0	0	0	0	0	0	0	0	0	0	0	0	0	0	0	0	0	0	0	0	0	0
24	16	American Samoa	0	0	0	0	0	0	0	0	0	0	0	0	0	0	0	0	0	0	0	0	0	0	0	0	0	0	0	0	0	0	0	0	0	0	0	0	0	0	0	0	0	0	0	0	0	0	0
11	20	Andorra	0	0	0	0	0	0	0	0	0	0	0	0	0	0	0	0	0	0	0	0	0	0	0	0	0	0	0	0	0	0	0	0	0	0	0	0	0	0	0	0	0	0	0	0	0	0	0
10	24	Angola	0	0	3.56153e-06	8.90381e-06	2.22595e-05	5.56488e-05	0.000139122	0.000347805	0.000869513	0.00217378	0.00543446	0.0108689	0.0217378	0.0434757	0.0869513	0.173903	0.347805	0.69561	1.39122	2.71288	5.0084	5.84313	6.67786	7.51259	8.76469	10.0168	10.6428	11.2689	5.35219	5.42681	5.5058	5.58965	5.67889	5.77416	5.87622	5.98596	6.10446	6.23302	6.37323	6.52708	6.69709	6.88646	7.09945	7.34172	7.62117	7.94907	8.34235
4	28	Antigua & Barb.	0	0	0	0	0	0	0	0	0	0	0	0	0	0	0	0	0	0	0	0	0	0	0	0	0	0	0	0	0	0	0	0	0	0	0	0	0	0	0	0	0	0	0	0	0	0	0
16	31	Azerbaijan	0	0	0	0	0	0	0	0	0	0	0.000451894	0.000726258	0.0011672	0.00187586	0.00301477	0.00484517	0.00778687	0.0125146	0.0201128	0.0318854	0.0504024	0.0756036	0.100805	0.126006	0.100805	0.126006	0.151207	0.176408	0.114933	0.124511	0.134887	0.146128	0.158305	0.171497	0.185788	0.201271	0.218043	0.236213	0.255898	0.277223	0.300325	0.325352	0.352464	0.381836	0.413656	0.448127	0.485471
6	32	Argentina	0	0	0	0	0	0	0	0	0	0	0	0	0	0	0	0	0	0	0	0	0	0	0	0	0	0	0	0.000162879	0.000325758	0.000651517	0.00130303	0.00260607	0.00521213	0.0104243	0.0208485	0.0416971	0.0833941	0.166788	0.463675	0.592473	0.757049	0.967341	1.23605	1.57939	2.10586	3.02309	3.94031
24	36	Australia	0	0	0	0	0	0	0	0	0	0	0	0	0	0	0	0	0	0	0	0	0	0	0	0	0	0	0	0	0	0	0	0	0	0	0	0	0	0.209478	0.191868	0.182363	0.198144	0.254695	0.473283	1.00157	1.48965	1.93366	2.67071
11	40	Austria	0	0	0	0	0	0	0	0	0	0	0	0	0	0	0	0	0	0	0	0	0	0	0	0	0	0	0	0	0	0	0	0	0	0	0	0	0	0	0	0	0	0	0	0	0	0	0
4	44	Bahamas	0	0	0	0	0	0	0	0	0	0	0	0	0	0	0	0	0	0	0	0	0	0	0	0	0	0	0	0	0	0	0	0	0	0	0	0	0	0	0	0	0	0	0	0	0	0	0
17	48	Bahrain	0	0	0	0	0	0	0	0	0	0	0	0	0	0	0	0	0	0	0	0	0	0	0	0	0	0	0	0	0	0	0	0	0	0	0	0	0	0	0	0	0	0	0	0	0	0	0
18	50	Bangladesh	0	0	0	2.36277	3.93794	6.56324	10.9387	18.2312	30.3854	50.6423	84.4038	90.6099	96.8161	104.263	111.711	119.158	126.606	140.259	153.913	172.531	191.15	198.597	206.045	206.045	233.352	248.246	322.72	397.194	407.755	416.077	424.568	433.233	442.075	451.096	460.302	469.696	479.282	489.063	623.805	806.645	1043.08	1348.8	1744.14	2255.36	2941.77	3837.09	5207.67
16	51	Armenia	0	0	0	0	0	0	0	0	0	0	0	0	0	0	0	0	0	0	0	0	0	0	0	0	0	0	0	0	0	0	0	0	0	0	0	0	0	0	0	0	0	0	0	0	0	0	0
4	52	Barbados	0	0	0	0	0	0	0	0	0	0	0	0	0	0	0	0	0	0	0	0	0	0	0	0	0	0	0	0	0	0	0	0	0	0	0	0	0	0	0	0	0	0	0	0	0	0	0
11	56	Belgium	0	0	0	0	0	0	0	0	0	0	0	0	0	0	0	0	0	0	0	0	0	0	0	0	0	0	0	0	0	0	0	0	0	0	0	0	0	0	0	0	0	0	0	0	0	0	0
4	60	Bermuda	0	0	0	0	0	0	0	0	0	0	0	0	0	0	0	0	0	0	0	0	0	0	0	0	0	0	0	0	0	0	0	0	0	0	0	0	0	0	0	0	0	0	0	0	0	0	0
18	64	Bhutan	0	0	0.000594817	0.00111528	0.0013941	0.00174263	0.00217828	0.00272286	0.00340357	0.00425446	0.00531808	0.00797712	0.0119657	0.0179485	0.0269228	0.0403842	0.0605762	0.0908644	0.136297	0.136297	0.136297	0.136297	0.136297	0.149926	0.163556	0.204445	0.272593	0.340741	0.372174	0.379066	0.386086	0.393236	0.400518	0.407935	0.415489	0.423184	0.43102	0.439002	0.558915	0.759395	1.03179	1.40188	1.90473	2.58795	3.59438	4.9922	6.93361
6	68	Bolivia	0	0	0	0	0	0	0	0	0	0	0	0	0	0	0	0	0	0	0	0	0	0	0	0	0	0	0	0.00276961	0.00564473	0.0115045	0.0234473	0.0477877	0.097396	0.198502	0.404566	0.824545	1.6805	3.42502	6.98052	8.28773	9.83974	9.96483	10.0899	12.0466	10.3577	8.66877	14.1402
12	70	Bsnia.&Hrzgvna.	0	0	0	0	0	0	0	0	0	0	0	0	0	0	0	0	0	0	0	0	0	0	0	0	0	0	0	0	0	0	0	0	0	0	0	0	0	0	0	0	0	0	0	0	0	0	0
10	72	Botswana	0	0	0	0	0	0	0	0	0	0	0	0	0	0	0	0	0	0	0	0	0	0	0	0	0	0	0	0	0	0	0	0	0	0	0	0	0	0	0	0	0	0	0	0	0	0	0
5	76	Brazil	0	0	0	0	0	0	0	0	0	0	0	0	0	0	0	0	0	0	0	0	0	0	0	0	0	0	0	3.81885e-06	8.78627e-06	2.03198e-05	4.72417e-05	0.00011042	0.000259473	0.000612969	0.00145561	0.00347421	0.00833283	0.0200799	0.0514229	0.126305	0.320791	0.778832	1.83425	4.22658	9.58254	21.3205	52.9683
4	84	Belize	0	0	0	0	0	0	0	0	0	0	0	0	0	0	0	0	0	0	0	0	0	0	0	0	0	0	0	3.24393e-09	7.01965e-09	1.51901e-08	3.28703e-08	7.11292e-08	1.53919e-07	3.3307e-07	7.20742e-07	1.55964e-06	3.37496e-06	7.30318e-06	1.58036e-05	3.26608e-05	6.7499e-05	0.000139498	0.000288296	0.000595811	0.00134057	0.00301629	0.00678666
18	86	British Indian Ocean Territory	0	0	0	0	0	0	0	0	0	0	0	0	0	0	0	0	0	0	0	0	0	0	0	0	0	0	0	0	0	0	0	0	0	0	0	0	0	0	0	0	0	0	0	0	0	0	0
24	90	Solomon Islands	0	0	4.60141e-10	8.62763e-10	1.61768e-09	3.03315e-09	5.68716e-09	1.06634e-08	1.99939e-08	3.74886e-08	7.02911e-08	1.58155e-07	3.55849e-07	8.0066e-07	1.80149e-06	4.05334e-06	9.12002e-06	2.052e-05	4.61701e-05	0.000103883	0.000233736	0.000525906	0.00118329	0.0026624	0.0059904	0.0134784	0.0303264	0.0682344	0.0841853	0.10381	0.127934	0.157566	0.193927	0.238499	0.293071	0.359796	0.441259	0.54054	0.661297	0.682169	0.702501	0.72201	0.740339	0.757038	0.756124	0.752091	0.744166
4	92	Br.Virgin Is.	0	0	0	0	0	0	0	0	0	0	0	0	0	0	0	0	0	0	0	0	0	0	0	0	0	0	0	0	0	0	0	0	0	0	0	0	0	0	0	0	0	0	0	0	0	0	0
21	96	Brunei Dar El Salaam	0	0	1.90934e-08	3.58002e-08	6.71253e-08	1.2586e-07	2.35987e-07	4.42477e-07	8.29644e-07	1.55558e-06	2.91672e-06	6.56261e-06	1.47659e-05	3.32232e-05	7.47522e-05	0.000168193	0.000378433	0.000851475	0.00191582	0.00287373	0.00431059	0.00775906	0.0193977	0.0320061	0.0523737	0.0654671	0.122751	0.220951	0.228789	0.249054	0.27111	0.295115	0.321242	0.349676	0.380621	0.414299	0.450949	0.490835	0.53424	0.561072	0.589242	0.618817	0.649865	0.68246	0.694739	0.707226	0.7536
12	100	Bulgaria	0	0	0	0	0	0	0	0	0	0	0	0	0	0	0	0	0	0	0	0	1.05606	1.14846	1.22766	1.32007	0.726038	1.05606	1.65009	1.65009	1.70603	1.78727	1.87238	1.96154	2.05495	2.1528	2.25532	2.36271	2.47522	2.59309	2.71657	2.84603	2.93655	3.09111	3.2538	3.31056	3.36739	3.92515	4.5027
21	104	Myanmar	0	0	0	0.00635821	0.010597	0.0176617	0.0294361	0.0490602	0.081767	1.37333	4	4.4	4.8	5.2	5.6	6	6.4	6.8	7.2	7.6	8	10	12	11.6	13.8	16	18	20	20.4	20.8	21.2	21.6	22	22.4	22.8	23.2	23.6	24	25.6	27.2	27	272.6	518.2	763.8	1009.4	1255	1780
9	108	Burundi	0	0	1.10782e-08	2.21565e-08	4.43129e-08	8.86259e-08	1.77252e-07	3.54504e-07	7.09007e-07	1.41801e-06	2.83603e-06	6.1877e-06	1.35004e-05	2.94555e-05	6.42665e-05	0.000140218	0.00030593	0.000667483	0.00145633	0.00273061	0.0049151	0.00897007	0.0158512	0.027371	0.0464477	0.0777585	0.128302	0.209948	0.213403	0.21598	0.218701	0.22158	0.224635	0.227885	0.231356	0.235075	0.239076	0.243399	0.248096	0.253227	0.25887	0.265126	0.272123	0.280037	0.289106	0.299672	0.312241
14	112	Belarus	0	0	0	0	0	0	0	0	0	0	0	0	0	0	0	0	0	0	0	0	0	0	0	0	0	0	0	0	0	0	0	0	0	0	0	0	0	0	0	0	0	0	0	0	0	0	0
21	116	Cambodia	0	0	0	0	1.34318	2.95791	6.53764	14.5058	32.3177	72.3121	162.531	174.938	188.292	202.665	218.136	234.787	252.71	272.001	292.764	309.029	325.294	357.823	390.352	422.882	455.411	487.94	541.614	595.287	602.335	609.383	616.431	623.48	630.528	637.576	644.624	651.672	658.72	665.768	672.816	679.864	692.811	709.307	726.195	743.485	761.187	811.941	869.936
8	120	Cameroon	0	0	6.76399e-06	1.5219e-05	3.42427e-05	7.70461e-05	0.000173354	0.000390046	0.000877603	0.00197461	0.00444287	0.00761634	0.0130566	0.0223827	0.0383704	0.0657778	0.112762	0.193306	0.331382	0.568083	0.973857	1.11298	1.27198	1.45369	1.66136	1.89869	2.16994	2.47993	2.46087	2.48468	2.50978	2.5363	2.56438	2.59422	2.62601	2.65999	2.69648	2.7358	2.77841	2.82481	2.87569	2.93189	2.9945	3.06499	3.14537	3.23848	3.3485
1	124	Canada	0	0	0	0	0	0	0	0	0	0	0	0	0	0	0	0	0	0	0	0	0	0	0	0	0	0	0	0	0	0	0	0	0	0	0	0	0	0	0	0	0	0	0	0	0	0	0
8	132	Cape Verde	0	0	0	0	0	0	0	0	0	0	0	0	0	0	0	0	0	0	0	0	0	0	0	0	0	0	0	0	0	0	0	0	0	0	0	0	0	0	0	0	0	0	0	0	0	0	0
4	136	Cayman Islands	0	0	0	0	0	0	0	0	0	0	0	0	0	0	0	0	0	0	0	0	0	0	0	0	0	0	0	0	0	0	0	0	0	0	0	0	0	0	0	0	0	0	0	0	0	0	0
8	140	Central African Rep.	0	0	8.03072e-06	1.80691e-05	4.06555e-05	9.1475e-05	0.000205819	0.000463092	0.00104196	0.0023444	0.00527491	0.0083288	0.0131507	0.0207643	0.0327858	0.051767	0.0817374	0.129059	0.203777	0.321754	0.508032	0.534771	0.562917	0.592544	0.62373	0.656558	0.691114	0.727488	0.729922	0.740724	0.75217	0.76433	0.777284	0.791129	0.805976	0.821959	0.839237	0.858006	0.878504	0.90103	0.92596	0.953778	0.985123	1.02085	1.06216	1.11075	1.16922
18	144	Sri Lanka	0	0	0.0492888	0.0924166	0.173281	0.324902	0.609191	1.14223	2.14169	4.01567	7.52937	8.78427	10.0392	11.2941	12.549	13.8038	15.0587	16.3136	17.5685	18.8234	20.0783	22.5881	25.0979	24.345	23.3411	25.0979	31.3724	37.6469	37.853	37.1108	36.3831	35.6697	34.9703	34.2846	33.6124	32.9533	32.3072	31.6737	31.0526	30.4438	35.6109	44.5136	55.6421	62.7824	69.9228	69.2649	217
8	148	Chad	0	0	1.44731e-05	2.89462e-05	5.78925e-05	0.000115785	0.00023157	0.00046314	0.00092628	0.00185256	0.00370512	0.00635163	0.0108885	0.018666	0.0319989	0.0548553	0.0940376	0.161207	0.276355	0.437563	0.690888	1.11406	1.78767	2.93565	4.90674	7.86965	13.7719	23.6089	24.0725	23.9514	23.8265	23.6978	23.5649	23.4274	23.2852	23.1378	22.9849	22.826	22.6607	22.4884	22.3086	22.1207	21.9241	21.7183	21.503	21.2782	21.0448
6	152	Chile	0	0	0	0	0	0	0	0	0	0	0	0	0	0	0	0	0	0	0	0	0	0	0	0	0	0	0	1.40491e-07	2.88377e-07	5.91931e-07	1.21502e-06	2.49398e-06	5.11923e-06	1.05079e-05	2.15688e-05	4.42728e-05	9.08758e-05	0.000186535	0.000382887	0.000845959	0.00186908	0.0041296	0.0102154	0.0256812	0.0605357	0.140874	0.319378
20	156	China	0	0	0.659199	1.648	4.11999	10.3	25.75	64.3749	160.937	241.406	1615.56	1432.96	1203.56	610.868	837.406	1040.28	1402.6	1164.65	915.072	1108.61	1029.63	2538.91	2903.28	2253.88	2009.26	2574.96	2768.18	2808.52	2939.1	3375.8	3589.45	4039.53	5038.78	5568.04	6220.7	7791.09	8442.78	8253.3	9664.67	9970.29	10979	11615.3	12133.8	11928.2	10121.9	10241.2	10562.8
20	158	Taiwan	0	0	0.0117188	0.0234375	0.046875	0.09375	0.1875	0.375	0.75	1.5	3	3.15755	3.31511	3.47266	3.63022	3.78777	3.94533	4.10288	4.26044	4.41799	4.57554	5.67972	6.84691	8.07713	9.37037	10.7266	11.0417	56.7843	64.777	68.375	72.1723	76.1799	80.4094	84.8731	89.5839	94.5555	99.8023	105.339	111.183	117.35	120.946	125.452	130.125	134.771	139.44	144.43	149.444
24	162	Christmas Isl.	0	0	0	0	0	0	0	0	0	0	0	0	0	0	0	0	0	0	0	0	0	0	0	0	0	0	0	0	0	0	0	0	0	0	0	0	0	0	0	0	0	0	0	0	0	0	0
24	166	Cocos (Keeling) Isl.	0	0	0	0	0	0	0	0	0	0	0	0	0	0	0	0	0	0	0	0	0	0	0	0	0	0	0	0	0	0	0	0	0	0	0	0	0	0	0	0	0	0	0	0	0	0	0
6	170	Colombia	0	0	0	0	0	0	0	0	0	0	0	0	0	0	0	0	0	0	0	0	0	0	0	0	0	0	0	1.76583e-07	3.77887e-07	8.05217e-07	1.70932e-06	3.61641e-06	7.62837e-06	1.60478e-05	3.36779e-05	7.05201e-05	0.000147369	0.000307395	0.000579982	0.00109035	0.00259302	0.00622325	0.0149358	0.0322367	0.0692037	0.166673	0.389878
9	174	Comoros	0	0	0	0	0	0	0	0	0	0	0	0	0	0	0	0	0	0	0	0.00836372	0.0250912	0.0451641	0.0790372	0.135492	0.228643	0.381072	0.71451	1.28612	1.27807	1.36766	1.46351	1.56608	1.67583	1.79326	1.91891	2.05335	2.1972	2.35112	2.5158	2.69201	2.88055	3.08227	3.29811	3.52904	3.77612	4.04048	4.32332
9	175	Mayotte	0	0	0	0	0	0	0	0	0	0	0	0	0	0	0	0	0	0	0	0	0	0	0	0	0	0	0	0	0	0	0	0	0	0	0	0	0	0	0	0	0	0	0	0	0	0	0
8	178	Congo	0	0	2.88589e-06	5.77177e-06	1.15435e-05	2.30871e-05	4.61742e-05	9.23484e-05	0.000184697	0.000369393	0.000738787	0.00126649	0.00217113	0.00372194	0.00638046	0.0109379	0.0187507	0.0321441	0.0551042	0.0944644	0.161939	0.27761	0.475902	0.815832	1.39857	2.39755	4.11008	7.04586	6.9905	6.96113	6.93076	6.89934	6.86677	6.83296	6.79782	6.76123	6.72307	6.68317	6.64139	6.59752	6.55135	6.50263	6.45106	6.39634	6.3381	6.27597	6.20962
8	180	Zaire	0	0	0.000139373	0.000268449	0.000517593	0.000998989	0.00193011	0.00373296	0.00722731	0.0140072	0.0271756	0.053116	0.103955	0.203711	0.399676	0.785056	1.54372	3.03868	5.98727	10.1035	16.8392	19.6457	22.4523	25.2588	29.4686	33.6784	35.7833	37.8882	38.1874	38.4338	38.6926	38.9651	39.2526	39.5569	39.8798	40.2236	40.591	40.985	41.4098	41.8699	42.3713	42.9216	43.5304	44.2106	44.9794	45.8614	46.892
24	184	Cook Islands	0	0	0	0	0	0	0	0	0	0	0	0	0	0	0	0	0	0	0	0	0	0	0	0	0	0	0	0	0	0	0	0	0	0	0	0	0	0	0	0	0	0	0	0	0	0	0
4	188	Costa Rica	0	0	0	0	0	0	0	0	0	0	0	0	0	0	0	0	0	0	0	0	0	0	0	0	0	0	0	3.91274e-07	8.46691e-07	1.83218e-06	3.96472e-06	8.5794e-06	1.85653e-05	4.0174e-05	8.6934e-05	0.000188119	0.000407078	0.00088089	0.0019686	0.00439679	0.0103875	0.0248622	0.0581514	0.133493	0.337957	0.866643	2.11474
12	191	Croatia	0	0	0	0	0	0	0	0	0	0	0	0	0	0	0	0	0	0	0	0	0	0	0	0	0	0	0	0	0	0	0	0	0	0	0	0	0	0	0	0	0	0	0	0	0	0	0
4	192	Cuba	0	0	0	0	0	0	0	0	0	0	0	0	0	0	0	0	0	0	0	0	0	0	0	0	0	0	0	1.27922e-07	2.9731e-07	6.90992e-07	1.60597e-06	3.73251e-06	8.67491e-06	2.01618e-05	4.6859e-05	0.000108907	0.000253117	0.000588281	0.00136725	0.0031777	0.00797356	0.0199339	0.0498348	0.105762	0.22371	0.478736	1.02586
12	196	Cyprus	0	0	0	0	0	0	0	0	0	0	0	0	0	0	0	0	0	0	0	0	0	0	0	0	0	0	0	0	0	0	0	0	0	0	0	0	0	0	0	0	0	0	0	0	0	0	0
12	203	Czech Rep.	0	0	0	0	0	0	0	0	0	0	0	0	0	0	0	0	0	0	0	0	0	0	0	0	0	0	0	0	0	0	0	0	0	0	0	0	0	0	0	0	0	0	0	0	0	0	0
8	204	Benin	0	0	4.50168e-06	1.12542e-05	2.81355e-05	7.03387e-05	0.000175847	0.000439617	0.00109904	0.0027476	0.00686901	0.0117754	0.0201865	0.0346054	0.0593235	0.101698	0.174339	0.298866	0.512342	0.878301	1.50566	1.72075	1.96657	2.24751	2.52845	2.80939	2.90304	2.78753	2.5731	2.37517	2.19247	2.02381	1.86814	1.72443	1.59178	1.46934	1.35631	1.25198	1.15568	1.08345	1.01573	0.952247	0.892732	0.836936	0.854017	0.871445	0.88923
11	208	Denmark	0	0	0	0	0	0	0	0	0	0	0	0	0	0	0	0	0	0	0	0	0	0	0	0	0	0	0	0	0	0	0	0	0	0	0	0	0	0	0	0	0	0	0	0	0	0	0
4	212	Dominica	0	0	0	0	0	0	0	0	0	0	0	0	0	0	0	0	0	0	0	0	0	0	0	0	0	0	0	0	0	0	0	0	0	0	0	0	0	0	0	0	0	0	0	0	0	0	0
4	214	Dominican Rep.	0	0	0	0	0	0	0	0	0	0	0	0	0	0	0	0	0	0	0	0	0	0	0	0	0	0	0	2.47416	2.55607	2.64014	2.72638	2.81479	2.90534	2.99804	3.09285	3.18973	3.28863	3.38948	3.49221	3.69948	3.91748	4.14656	4.387	4.63909	6.0062	7.77164	10.1016
6	218	Ecuador	0	0	0	0	0	0	0	0	0	0	0	0	0	0	0	0	0	0	0	0	0	0	0	0	0	0	0	1.5862e-07	3.17276e-07	6.34622e-07	1.26938e-06	2.53905e-06	5.07866e-06	1.01585e-05	2.03192e-05	4.06429e-05	8.12948e-05	0.000162608	0.000325251	0.000650575	0.00162579	0.00371608	0.00849391	0.0190384	0.0421781	0.0963496	0.211969
4	222	El Salvador	0	0	0	0	0	0	0	0	0	0	0	0	0	0	0	0	0	0	0	0	0	0	0	0	0	0	0.320712	0.349867	0.353771	0.35878	0.365318	0.373992	0.385669	0.401603	0.423611	0.497823	0.572034	0.646246	0.720458	0.79467	0.920707	1.04674	1.17278	1.37465	1.57652	1.88809	2.19966
8	226	Eq. Guinea	0	0	0	0	0	0	0	0	0	0	0	0	0	0	0	0	0	0	0	0	0	0	0	0	0	0	0	0	0	0	0	0	0	0	0	0	0	0	0	0	0	0	0	0	0	0	0
9	231	Ethiopia	0	0	0	0	0	0	0	0	0	0	0	0	0	0	0	0	0	0	0	0	0	0	0	0	0	0	0	0	0	0	0	0	0	0	0	0	0	0	0	0	0	0	0	0	0	0	0
9	232	Eritrea	0	0	0	0	0	0	0	0	0	0	0	0	0	0	0	0	0	0	0	0	0	0	0	0	0	0	0	0	0	0	0	0	0	0	0	0	0	0	0	0	0	0	0	0	0	0	0
12	233	Estonia	0	0	0	0	0	0	0	0	0	0	0	0	0	0	0	0	0	0	0	0	0	0	0	0	0	0	0	0	0	0	0	0	0	0	0	0	0	0	0	0	0	0	0	0	0	0	0
11	234	Faeroe Islands	0	0	0	0	0	0	0	0	0	0	0	0	0	0	0	0	0	0	0	0	0	0	0	0	0	0	0	0	0	0	0	0	0	0	0	0	0	0	0	0	0	0	0	0	0	0	0
6	238	Falkland Is.	0	0	0	0	0	0	0	0	0	0	0	0	0	0	0	0	0	0	0	0	0	0	0	0	0	0	0	0	0	0	0	0	0	0	0	0	0	0	0	0	0	0	0	0	0	0	0
24	242	Fiji	0	0	0	0	0	0	0	0	0	0	0	0	0	0	0	0	0	0	0	0	0	0	0	0	0	0	0	0	0	0	0	0	0	0	0	0	0	0	0	0	0	0	0	0	0	0	0
11	246	Finland	0	0	0	0	0	0	0	0	0	0	0	0	0	0	0	0	0	0	0	0	0	0	0	0	0	0	0	0	0	0	0	0	0	0	0	0	0	0	0	0	0	0	0	0	0	0	0
11	250	France	0	0	0	0	0	0	0	0	0	0	0	0	0	0	0	0	0	0	0	0	3.10265	5.53942	7.48608	11.4204	7.89761	10.7419	13.2324	15.8896	16.3235	16.7573	17.1911	17.6249	18.0588	18.4752	18.8916	19.3081	19.7245	20.1409	21.5755	22.828	23.7466	24.9403	26.1207	26.7166	27.163	28.0576	28.7334
6	254	French Guiana	0	0	0	0	0	0	0	0	0	0	0	0	0	0	0	0	0	0	0	0	0	0	0	0	0	0	0	0.0386267	0.0423762	0.0464662	0.0509232	0.0557745	0.0610485	0.066774	0.0729796	0.0796935	0.0869422	0.0947492	0.103134	0.112109	0.121677	0.131827	0.142529	0.153725	0.165316	0.177152	0.188998
24	258	French Polynesia	0	0	0	0	0	0	0	0	0	0	0	0	0	0	0	0	0	0	0	0	0	0	0	0	0	0	0	0	0	0	0	0	0	0	0	0	0	0	0	0	0	0	0	0	0	0	0
9	262	Djibouti	0	0	0	0	0	0	0	0	0	0	0	0	0	0	0	0	0	0	0	0	0	0	0	0	0	0	0	0	0	0	0	0	0	0	0	0	0	0	0	0	0	0	0	0	0	0	0
8	266	Gabon	0	0	6.40505e-07	1.44114e-06	3.24256e-06	7.29576e-06	1.64155e-05	3.69348e-05	8.31032e-05	0.000186982	0.00042071	0.000721217	0.00123637	0.0021195	0.00363342	0.00622872	0.0106778	0.0183048	0.0313797	0.0537937	0.0922178	0.158088	0.271008	0.464584	0.79643	1.36531	2.34053	4.01234	4.04105	4.02331	4.00495	3.98591	3.96613	3.94555	3.92411	3.90171	3.87827	3.85367	3.8278	3.80051	3.77161	3.7409	3.70813	3.67299	3.63511	3.59401	3.54911
16	268	Georgia	0	0	0	0	0	0	0	0	0	0	0	0	0	0	0	0	0	0	0	0	0	0	0	0	0	0	0	0	0	0	0	0	0	0	0	0	0	0	0	0	0	0	0	0	0	0	0
8	270	Gambia	0	0	1.36398e-07	2.72795e-07	5.4559e-07	1.09118e-06	2.18236e-06	4.36472e-06	8.72944e-06	1.74589e-05	3.49178e-05	5.9859e-05	0.000102615	0.000175912	0.000301564	0.000516967	0.000886228	0.00151925	0.00260443	0.00446473	0.00765382	0.0131208	0.0224929	0.0385592	0.0661015	0.113317	0.194257	0.333013	0.300686	0.271497	0.245142	0.221345	0.199858	0.180457	0.162939	0.147122	0.132841	0.119945	0.108302	0.162455	0.243686	0.365535	0.54831	0.822477	1.23373	1.85063	2.77598
17	275	Occupied Palestinian Territory	0	0	0	0	0	0	0	0	0	0	0	0	0	0	0	0	0	0	0	0	0	0	0	0	0	0	0	0	0	0	0	0	0	0	0	0	0	0	0	0	0	0	0	0	0	0	0
11	276	Germany	0	0	0	0	0	0	0	0	0	0	0	0	0	0	0	0	0	0	0	0	0	0	0	0	0	0	0	0	0	0	0	0	0	0	0	0	0	0	0	0	0	0	0	0	0	0	0
8	288	Ghana	0	0	7.50333e-06	1.68825e-05	3.79856e-05	8.54676e-05	0.000192302	0.00043268	0.000973529	0.00219044	0.00492849	0.00844885	0.0144837	0.0248293	0.0425644	0.0729676	0.125087	0.214435	0.367604	0.630178	1.0803	1.85195	3.17477	5.44247	9.32994	15.9942	27.4186	47.0033	46.7715	46.5319	46.2841	46.0274	45.7611	45.4844	45.1965	44.8961	44.5823	44.2536	43.9084	43.5449	43.1609	42.7538	42.3206	41.8574	41.3597	40.8219	40.2372
11	292	Gibraltar	0	0	0	0	0	0	0	0	0	0	0	0	0	0	0	0	0	0	0	0	0	0	0	0	0	0	0	0	0	0	0	0	0	0	0	0	0	0	0	0	0	0	0	0	0	0	0
24	296	Kiribati	0	0	0	0	0	0	0	0	0	0	0	0	0	0	0	0	0	0	0	0	0	0	0	0	0	0	0	0	0	0	0	0	0	0	0	0	0	0	0	0	0	0	0	0	0	0	0
11	300	Greece	0	0	0	0	0	0	0	0	0	0	0	0	0	0	0	0	0	0	0	0	1.76972	2.86695	3.10587	3.31823	2.38913	2.65459	3.98188	3.98188	4.16151	4.34113	4.52076	4.70039	4.88002	5.05964	5.23927	5.4189	5.59852	5.77815	5.95778	6.13741	6.72672	7.37179	8.08056	8.8557	9.70783	10.7484	11.8979
25	304	Greenland	0	0	0	0	0	0	0	0	0	0	0	0	0	0	0	0	0	0	0	0	0	0	0	0	0	0	0	0	0	0	0	0	0	0	0	0	0	0	0	0	0	0	0	0	0	0	0
4	308	Grenada	0	0	0	0	0	0	0	0	0	0	0	0	0	0	0	0	0	0	0	0	0	0	0	0	0	0	0	0	0	0	0	0	0	0	0	0	0	0	0	0	0	0	0	0	0	0	0
4	312	Guadaloupe	0	0	0	0	0	0	0	0	0	0	0	0	0	0	0	0	0	0	0	0	0	0	0	0	0	0	0	0	0	0	0	0	0	0	0	0	0	0	0	0	0	0	0	0	0	0	0
24	316	Guam	0	0	0	0	0	0	0	0	0	0	0	0	0	0	0	0	0	0	0	0	0	0	0	0	0	0	0	0	0	0	0	0	0	0	0	0	0	0	0	0	0	0	0	0	0	0	0
4	320	Guatemala	0	0	0	0	0	0	0	0	0	0	0	0	0	0	0	0	0	0	0	0	0	0	0	0	0	0	0	0.000738062	0.00145631	0.00287353	0.00566991	0.0111876	0.0220749	0.0435571	0.0859449	0.169583	0.334613	0.660243	1.30276	1.28564	1.45157	1.63347	1.83818	2.08746	2.33688	2.53936	2.67376
8	324	Guinea	0	0	7.76431e-06	1.74697e-05	3.93068e-05	8.84404e-05	0.000198991	0.000447729	0.00100739	0.00226663	0.00509992	0.00874272	0.0149875	0.0256929	0.0440449	0.0755056	0.129438	0.221894	0.38039	0.652097	1.11788	1.91637	3.2852	5.63177	9.65446	16.5505	28.3723	48.6382	48.9606	49.3014	49.6625	50.0458	50.4538	50.8892	51.3554	51.8562	52.3962	52.9808	53.6169	54.3126	55.0784	55.9275	56.8769	57.9493	59.1758	60.5999	62.286
6	328	Guyana	0	0	0	0	0	0	0	0	0	0	0	0	0	0	0	0	0	0	0	0	0	0	0	0	0	0	0	2.77541e-07	5.81515e-07	1.21841e-06	2.55287e-06	5.34886e-06	1.12071e-05	2.34816e-05	4.91996e-05	0.000103085	0.000215987	0.000452545	0.000948189	0.00199619	0.0042025	0.00884737	0.018626	0.0392127	0.0849609	0.184082	0.398844
4	332	Haiti	0	0	0	0	0	0	0	0	0	0	0	0	0	0	0	0	0	0	0	0	0	0	0	0	0	0	0	0.00124184	0.00194037	0.00303183	0.00473723	0.00740193	0.0115655	0.0180711	0.0282361	0.0441189	0.0689358	0.107712	0.1683	0.262969	0.371495	0.497538	0.666346	0.927059	1.27648	1.70049	2.39813
24	334	Heard and McDonald Isl.	0	0	0	0	0	0	0	0	0	0	0	0	0	0	0	0	0	0	0	0	0	0	0	0	0	0	0	0	0	0	0	0	0	0	0	0	0	0	0	0	0	0	0	0	0	0	0
11	336	Holy See	0	0	0	0	0	0	0	0	0	0	0	0	0	0	0	0	0	0	0	0	0	0	0	0	0	0	0	0	0	0	0	0	0	0	0	0	0	0	0	0	0	0	0	0	0	0	0
4	340	Honduras	0	0	0	0	0	0	0	0	0	0	0	0	0	0	0	0	0	0	0	0	0	0	0	0	0	0	0	1.21442e-08	2.5126e-08	5.19848e-08	1.07555e-07	2.22527e-07	4.60401e-07	9.52554e-07	1.9708e-06	4.07752e-06	8.43624e-06	1.74543e-05	3.61123e-05	7.47152e-05	0.000284629	0.000664135	0.00154965	0.0034506	0.00743205	0.0160075	0.0344777
20	0	Hong Kong	0	0	0	0	0	0	0	0	0	0	0	0	0	0	0	0	0	0	0	0	0	0	0	0	0	0	0	0	0	0	0	0	0	0	0	0	0	0	0	0	0	0	0	0	0	0	0
12	348	Hungary	0	0	0	0	0	0	0	0	0	0	0	0	0	0	0	0	0	0	0	0	1.10382	1.32458	1.76611	2.75954	2.20763	2.75954	2.75954	3.31145	3.66888	4.02631	4.38374	4.74117	5.0986	5.45603	5.81346	6.1709	6.52833	6.88576	7.24319	7.60062	8.58873	9.57684	10.185	10.6611	11.2565	12.0902	13.0452
11	352	Iceland	0	0	0	0	0	0	0	0	0	0	0	0	0	0	0	0	0	0	0	0	0	0	0	0	0	0	0	0	0	0	0	0	0	0	0	0	0	0	0	0	0	0	0	0	0	0	0
18	356	India	0	0	0	8.29204	16.3426	32.2091	63.4801	125.111	246.579	485.975	957.796	1005.69	1053.58	1101.47	1149.36	1197.25	1245.14	1293.03	1340.91	1388.8	1436.69	1484.58	1532.47	1580.36	1628.25	1676.14	1724.03	2107.15	2153.98	2200.8	2247.63	2294.45	2341.28	2388.11	2434.93	2481.76	2528.58	2575.41	3277.79	4090.59	5387.6	6609.79	9041.7	11886.7	15589.1	19577.8	26606
22	360	Indonesia	0	0	0.035434	0.0664388	0.124573	0.233574	0.437951	0.821158	9.03273	25.2506	55.4281	60.2781	65.1281	69.978	74.828	79.678	84.5279	89.3779	94.2278	99.0778	103.928	115.475	127.023	138.57	176.677	214.784	235.57	263.284	266.055	268.827	271.598	274.369	277.141	290.998	304.855	318.712	332.569	346.426	365.826	385.226	404.625	424.025	443.425	565.367	687.309	809.251	931.193
17	364	Iran, Isl.Rep.of	0	0	6.18078e-05	0.000129194	0.000529432	0.00149839	0.00393328	0.00842846	0.0164355	0.0303425	0.0910274	0.14223	0.221879	0.34562	0.53763	0.835247	1.29607	1.76914	2.39126	3.76185	5.90523	9.34995	14.7631	15.5012	24.9127	39.8603	74.7381	112.107	115.623	116.788	117.923	119.021	120.079	121.092	122.053	122.957	123.797	124.565	125.252	125.848	130.725	135.278	139.486	143.326	146.769	165.443	182.892
17	368	Iraq	0	0	0.000100302	0.000167317	0.000279226	0.000761525	0.00342686	0.00856716	0.0224888	0.0481903	0.0578283	0.0910796	0.143125	0.214688	0.322031	0.461091	0.658701	1.72909	3.70519	5.00201	6.66935	5.83568	4.58517	3.33467	3.33467	3.33467	4.16834	3.33467	3.33524	3.3358	3.33637	3.33693	3.3375	3.33806	3.33863	3.33919	3.33976	3.34032	3.51613	3.70119	3.89599	4.10104	4.31688	4.54409	5.19324	5.93513	6.78301
11	372	Ireland	0	0	0	0	0	0	0	0	0	0	0	0	0	0	0	0	0	0	0	0	0	0	0	0	0	0	0	0	0	0	0	0	0	0	0	0	0	0	0	0	0	0	0	0	0	0	0
17	376	Israel	0	0	0	0	0	0	0	0	0	0	0	0	0	0	0	0	0	0	0	0	0	0	0	0	0	0	0	0	0	0	0	0	0	0	0	0	0	0	0	0	0	0	0	0	0	0	0
11	380	Italy	0	0	0	0	0	0	0	0	0	0	0	0	0	0	0	0	0	0	0	0	8.6306	16.1824	21.1616	31.1199	19.9168	22.4064	33.0444	33.5622	34.5946	35.7875	37.0216	38.2982	39.6188	40.9849	42.3982	43.8602	45.3726	46.9372	48.5557	50.2301	53.5587	57.1088	60.8955	64.9311	66.4781	70.5493	193
8	384	Cote d'Ivoire	0	0	2.1398e-05	4.49358e-05	9.43652e-05	0.000198167	0.00041615	0.000873916	0.00183522	0.00385397	0.00809333	0.0138743	0.0237845	0.0407734	0.0698973	0.119824	0.205412	0.352136	0.603661	1.03485	1.77402	3.04118	5.21346	8.93736	15.3212	26.2649	45.0255	77.1866	77.6913	78.2215	78.7795	79.3682	79.9908	80.651	81.3531	82.1022	82.9045	83.7671	84.6989	85.7109	86.8165	88.033	89.3826	90.8947	92.6093	94.5824	96.8963
4	388	Jamaica	0	0	0	0	0	0	0	0	0	0	0	0	0	0	0	0	0	0	0	0	0	0	0	0	0	0	0	4.24087e-09	9.89536e-09	2.30892e-08	5.38747e-08	1.25708e-07	2.93318e-07	6.84408e-07	1.59695e-06	3.72622e-06	8.69452e-06	2.02872e-05	4.73368e-05	9.72324e-05	0.000199721	0.000410237	0.000842649	0.00173085	0.00392325	0.00889271	0.0201568
23	392	Japan	0	0	0.0751935	0.169185	0.380667	0.856501	1.92713	4.33604	9.75608	21.9512	49.3902	80.907	111.225	171.445	229.055	336.175	437.901	640.585	761.991	860.889	781.36	778.949	772.384	841.612	1016.82	1262.6	1614.29	2289.95	2457.23	2426.5	2394.98	2362.6	2329.31	2279.21	2228.54	2177.24	2125.24	2072.46	2091.43	2106.5	2117.37	2123.65	2124.93	2144.82	2157.16	2239.32	2725
15	398	Kazakhstan	0	0	0	0	0	0	0	0	0	0	0	0	0	0	0	0	0	0	0.66707	1.02335	1.56913	1.60324	1.63735	1.82497	2.04669	2.28547	2.60953	2.93359	2.90569	2.87779	2.84989	2.82198	2.79408	2.76618	2.73828	2.71038	2.68247	2.65457	2.62667	2.59877	2.57087	2.54296	2.51506	2.48716	2.45926	3.16492	3.73786
17	400	Jordan	0	0	0	0	0	0	0	0	0	0	0	0	0	0	0	0	0	0	0	0	0	0	0	0	0	0	0	0	0	0	0	0	0	0	0	0	0	0	0	0	0	0	0	0	0	0	0
9	404	Kenya	0	0	0	0	0	0	0	0	0	0	0	0	0	0	0	0	0	0	0	0	0	0	0	0	0	0	0	0.905203	1.07056	1.23592	1.40127	1.56663	1.69742	1.72065	1.74546	1.77204	1.80064	1.83154	1.86511	1.90179	1.94213	1.98683	2.03683	2.09335	2.15809	2.23347	2.32307
19	408	Dem.Rep.,Korea	0	0	0	1.77897	2.08816	2.44077	2.83918	3.28424	3.77437	4.30432	4.86333	6.15565	7.79048	9.85833	12.4735	15.7806	19.9619	25.2478	31.9292	35.503	38.984	46.2242	60.8902	45.1111	51.9804	58.6641	72.4025	89.3437	98.0092	103.034	108.315	113.868	119.704	125.84	132.29	139.07	146.197	153.69	161.566	169.846	172.607	173.245	173.885	174.528	175.172	175.727	177.266
19	410	Rep. of Korea	0	0	0	1.85581	2.21523	2.63837	3.13462	3.71411	4.38743	5.16527	6.05782	8.27185	11.2946	15.4212	21.0546	28.7445	39.2413	53.5688	73.1239	81.6928	90.1346	107.399	142.183	105.875	122.632	139.134	172.648	214.222	235.387	252.013	269.814	288.872	309.275	331.12	354.507	379.546	406.353	435.053	465.781	498.678	504.238	504.87	505.503	510.628	515.744	517.867	519.986
17	414	Kuwait	0	0	0	0	0	0	0	0	0	0	0	0	0	0	0	0	0	0	0	0	0	0	0	0	0	0	0	0	0	0	0	0	0	0	0	0	0	0	0	0	0	0	0	0	0	0	0
15	417	Kyrgyzstan	0	0	1.77021e-05	3.09788e-05	5.42128e-05	9.48724e-05	0.000166027	0.000290547	0.000508457	0.0008898	0.00155715	0.00250256	0.00402197	0.00646389	0.0103884	0.0166956	0.0268323	0.0431233	0.0693053	0.108478	0.169497	0.183056	0.196616	0.210176	0.223735	0.237295	0.271194	0.305094	0.322273	0.340177	0.359076	0.379024	0.400081	0.422308	0.44577	0.470535	0.496675	0.524268	0.553394	0.584139	0.616591	0.650846	0.687004	0.725171	0.765458	0.807983	0.852871
21	418	Lao	0	0	0.00380041	0.00712576	0.0133608	0.0250515	0.0469716	0.0880717	0.165134	0.309627	0.580551	0.624532	0.671845	0.722742	0.777496	0.836397	0.89976	0.967924	1.04125	1.22306	1.40486	1.58667	1.76847	1.95028	2.13209	2.31389	2.89236	3.47084	3.52869	3.58653	3.64438	3.70223	3.76007	3.81792	3.87577	3.93362	3.99146	4.04931	4.51209	4.97487	95.7594	103.909	112.059	120.209	128.358	136.508	201.169
17	422	Lebanon	0	0	0	0	0	0	0	0	0	0	0	0	0	0	0	0	0	0	0	0	0	0	0	0	0	0	0	0	0	0	0	0	0	0	0	0	0	0	0	0	0	0	0	0	0	0	0
10	426	Lesotho	0	0	0	0	0	0	0	0	0	0	0	0	0	0	0	0	0	0	0	0	0	0	0	0	0	0	0	0	0	0	0	0	0	0	0	0	0	0	0	0	0	0	0	0	0	0	0
12	428	Latvia	0	0	0	0	0	0	0	0	0	0	0	0	0	0	0	0	0	0	0	0	0	0	0	0	0	0	0	0	0	0	0	0	0	0	0	0	0	0	0	0	0	0	0	0	0	0	0
8	430	Liberia	0	0	4.04226e-05	9.09509e-05	0.00020464	0.000460439	0.00103599	0.00233097	0.00524469	0.0118005	0.0265512	0.041923	0.0661942	0.104517	0.165027	0.260569	0.411425	0.649618	1.02571	1.61955	2.55718	4.03765	6.37524	10.0662	15.8939	25.0957	39.6248	62.5655	63.1505	63.7651	64.4122	65.0951	65.8176	66.5841	67.4	68.2712	69.2053	70.2109	71.299	72.4827	73.7788	75.2085	76.7992	78.5876	80.6239	82.9789	85.7572
7	434	Libyan A.J.	0	0	0	0	0	0	0	0	0	0	0	0	0	0	0	0	0	0	0	0	0	0	0	0	0	0	0	0	0	0	0	0	0	0	0	0	0	0	0	0	0	0	0	0	0	0	0
11	438	Liechtenstein	0	0	0	0	0	0	0	0	0	0	0	0	0	0	0	0	0	0	0	0	0	0	0	0	0	0	0	0	0	0	0	0	0	0	0	0	0	0	0	0	0	0	0	0	0	0	0
12	440	Lithuania	0	0	0	0	0	0	0	0	0	0	0	0	0	0	0	0	0	0	0	0	0	0	0	0	0	0	0	0	0	0	0	0	0	0	0	0	0	0	0	0	0	0	0	0	0	0	0
11	442	Luxembourg	0	0	0	0	0	0	0	0	0	0	0	0	0	0	0	0	0	0	0	0	0	0	0	0	0	0	0	0	0	0	0	0	0	0	0	0	0	0	0	0	0	0	0	0	0	0	0
20	446	Macau	0	0	0	0	0	0	0	0	0	0	0	0	0	0	0	0	0	0	0	0	0	0	0	0	0	0	0	0	0	0	0	0	0	0	0	0	0	0	0	0	0	0	0	0	0	0	0
9	450	Madagascar	0	0	2.57008e-07	5.78268e-07	1.3011e-06	2.92748e-06	6.58684e-06	1.48204e-05	3.33459e-05	7.50282e-05	0.000168813	0.00050644	0.00151932	0.00455796	0.0136739	0.0410217	0.123065	0.369195	1.10758	2.49207	4.98413	10.5913	20.5595	37.8482	67.2858	132.469	241.283	425.793	428.527	429.087	429.692	430.348	431.063	431.845	432.705	433.654	434.71	435.89	437.22	438.732	440.466	442.479	444.844	447.668	451.102	455.375	460.848
10	454	Malawi	0	0	1.08928e-05	2.04768e-05	3.84996e-05	7.23981e-05	0.000136169	0.000256162	0.000481993	0.000907118	0.00170761	0.00313061	0.00573945	0.0105223	0.0192909	0.0353667	0.064839	0.118872	0.217931	0.384324	0.662628	0.795154	0.92768	1.06021	1.19273	1.32526	1.4379	1.55055	1.57515	1.60525	1.63728	1.67147	1.70807	1.74739	1.78978	1.83567	1.88559	1.94015	2.00016	2.06658	2.14068	2.22409	2.31895	2.42822	2.55602	2.70837	2.89444
21	458	Malaysia	0	0	0.00598469	0.0112503	0.0211524	0.0397768	0.0748136	0.14074	0.264816	0.498386	0.938189	1.14667	1.40149	1.71293	2.09359	2.55883	3.12746	3.82245	4.67188	5.49261	6.31335	7.57602	8.83869	10.1014	11.364	12.6267	13.7	14.7732	15.0076	15.2944	15.5996	15.9254	16.2741	16.6487	17.0526	17.4898	17.9654	18.4853	19.057	19.6899	20.3959	21.1905	22.0944	23.1355	24.3531	25.8046	27.5775
18	462	Maldives	0	0	0	0	0	0	0	0	0	0	0	0	0	0	0	0	0	0	0	0	0	0	0	0	0	0	0	0	0	0	0	0	0	0	0	0	0	0	0	0	0	0	0	0	0	0	0
8	466	Mali	0	0	3.57802e-06	6.70879e-06	1.2579e-05	2.35856e-05	4.4223e-05	8.29181e-05	0.000155471	0.000291509	0.000546579	0.000780827	0.00111547	0.00159352	0.00227646	0.00325209	0.00464585	0.00663692	0.00948132	0.0125101	0.0164606	0.022119	0.0295777	0.0400757	0.0556607	0.0753507	0.109886	0.156981	0.199701	0.252413	0.319194	0.403858	0.511274	0.647674	0.821044	1.04164	1.32267	1.68118	2.13927	2.72568	3.478	4.44567	5.69427	7.31159	9.41676	12.1742	15.8165
12	470	Malta	0	0	0	0	0	0	0	0	0	0	0	0	0	0	0	0	0	0	0	0	0	0	0	0	0	0	0	0	0	0	0	0	0	0	0	0	0	0	0	0	0	0	0	0	0	0	0
4	474	Martinique	0	0	0	0	0	0	0	0	0	0	0	0	0	0	0	0	0	0	0	0	0	0	0	0	0	0	0	0	0	0	0	0	0	0	0	0	0	0	0	0	0	0	0	0	0	0	0
8	478	Mauritania	0	0	4.41421e-06	8.82843e-06	1.76569e-05	3.53137e-05	7.06274e-05	0.000141255	0.00028251	0.000565019	0.00113004	0.00193721	0.00332093	0.00569302	0.00975947	0.0167305	0.0286809	0.0491672	0.0842867	0.133454	0.210717	0.339781	0.545229	0.909635	1.48849	2.40019	4.20034	7.20058	7.18454	7.13501	7.08378	7.03073	6.97569	6.91851	6.85899	6.7969	6.73198	6.66395	6.59244	6.51704	6.43725	6.35247	6.26196	6.16478	6.05976	5.94537	5.81957
9	480	Mauritius	0	0	0	0	0	0	0	0	0	0	0	0	0	0	0	0	0	0	0	0	0	0	0	0	0	0	0	0	0	0	0	0	0	0	0	0	0	0	0	0	0	0	0	0	0	0	0
3	484	Mexico	0	0	0	0	0	0	0	0	0	0	0	0	0	0	0	0	0	0	0	0	0	0	0	0	0	0	3.8602	15.4408	16.7366	18.0324	19.3282	20.624	21.9198	23.2156	24.5114	25.8072	27.103	28.3987	29.6945	30.9903	32.2861	33.5819	34.8777	36.1735	37.4693	38.7651	45.7403
11	492	Monaco	0	0	0	0	0	0	0	0	0	0	0	0	0	0	0	0	0	0	0	0	0	0	0	0	0	0	0	0	0	0	0	0	0	0	0	0	0	0	0	0	0	0	0	0	0	0	0
20	496	Mongolia	0	0	0	0	0	0	0	0	0	0	0	0	0	0	0	0	0	0	0	0	0	0	0	0	0	0	0	0	0	0	0	0	0	0	0	0	0	0	0	0	0	0	0	0	0	0	0
14	498	Rep. of Moldova	0	0	0	0	0	0	0	0	0	0	0	0	0	0	0	0	0	0	0	0	0	0	0	0	0	0	0	0	0	0	0	0	0	0	0	0	0	0	0	0	0	0	0	0	0	0	0
4	500	Montserrat	0	0	0	0	0	0	0	0	0	0	0	0	0	0	0	0	0	0	0	0	0	0	0	0	0	0	0	0	0	0	0	0	0	0	0	0	0	0	0	0	0	0	0	0	0	0	0
7	504	Morocco	0	0	1.13617e-05	2.55637e-05	5.75184e-05	0.000129416	0.000291187	0.000655171	0.00147413	0.0033168	0.00746281	0.0119609	0.0191703	0.0307249	0.0492441	0.0789255	0.126497	0.202742	0.324942	0.53042	0.860141	0.817134	0.774127	0.864442	0.774127	0.645106	0.967659	0.752623	0.786277	0.81993	0.853583	0.887236	0.920889	0.954542	0.988195	1.02185	1.0555	1.08915	1.12281	1.15646	1.36369	1.57092	1.77814	1.98537	2.1926	2.39983	2.60705
10	508	Mozambique	0	0	2.24359e-05	4.71155e-05	9.89425e-05	0.000207779	0.000436337	0.000916307	0.00192424	0.00404091	0.00848592	0.01432	0.024165	0.0407784	0.0688135	0.116123	0.195957	0.330678	0.558019	1.20323	2.35414	3.45274	4.55134	5.64994	6.74854	7.84714	9.80893	11.7707	12.1605	12.5502	12.9399	13.3297	13.7194	14.1092	14.4989	14.8886	15.2784	15.6681	16.0579	16.4476	16.8472	18.7191	20.7991	23.1101	24.5544	26.0891	27.7197
17	512	Oman	0	0	0	0	0	0	0	0	0	0	0	0	0	0	0	0	0	0	0	0	0	0	0	0	0	0	0	0	0	0	0	0	0	0	0	0	0	0	0	0	0	0	0	0	0	0	0
10	516	Namibia	0	0	0	0	0	0	0	0	0	0	0	0	0	0	0	0	0	0	0	0	0	0	0	0	0	0	0	0	0	0	0	0	0	0	0	0	0	0	0	0	0	0	0	0	0	0	0
24	520	Nauru	0	0	0	0	0	0	0	0	0	0	0	0	0	0	0	0	0	0	0	0	0	0	0	0	0	0	0	0	0	0	0	0	0	0	0	0	0	0	0	0	0	0	0	0	0	0	0
18	524	Nepal	0	0	0.0145684	0.0273158	0.0512171	0.0960321	0.18006	0.337613	0.633024	1.18692	2.22547	2.32099	2.4206	2.52449	2.63284	2.74583	2.86368	2.98659	3.11477	3.22601	3.33725	3.55973	3.78222	4.0047	4.22718	4.44967	5.56208	6.6745	6.83784	7.00118	7.16452	7.32786	7.4912	7.65454	7.81788	7.98122	8.14456	8.3079	8.47124	8.63458	157.145	163.692	170.513	177.291	184.069	193.747	282.892
11	528	Netherlands	0	0	0	0	0	0	0	0	0	0	0	0	0	0	0	0	0	0	0	0	0	0	0	0	0	0	0	0	0	0	0	0	0	0	0	0	0	0	0	0	0	0	0	0	0	0	0
4	530	Neth.Antilles	0	0	0	0	0	0	0	0	0	0	0	0	0	0	0	0	0	0	0	0	0	0	0	0	0	0	0	0	0	0	0	0	0	0	0	0	0	0	0	0	0	0	0	0	0	0	0
4	533	Aruba	0	0	0	0	0	0	0	0	0	0	0	0	0	0	0	0	0	0	0	0	0	0	0	0	0	0	0	1.21664e-09	2.63272e-09	5.69704e-09	1.2328e-08	2.6677e-08	5.77273e-08	1.24918e-07	2.70315e-07	5.84943e-07	1.26578e-06	2.73906e-06	5.92715e-06	1.22494e-05	2.53155e-05	5.23187e-05	0.000108125	0.000246462	0.00060423	0.0019717	0.00474298
24	540	New Caledonia	0	0	0	0	0	0	0	0	0	0	0	0	0	0	0	0	0	0	0	0	0	0	0	0	0	0	0	0	0	0	0	0	0	0	0	0	0	0	0	0	0	0	0	0	0	0	0
24	548	Vanuatu	0	0	0	0	0	0	0	0	0	0	0	0	0	0	0	0	0	0	0	0	0	0	0	0	0	0	0	0	0	0	0	0	0	0	0	0	0	0	0	0	0	0	0	0	0	0	0
24	554	New Zealand	0	0	0	0	0	0	0	0	0	0	0	0	0	0	0	0	0	0	0	0	0	0	0	0	0	0	0	0	0	0	0	0	0	0	0	0	0	0	0	0	0	0	0	0	0	0	0
4	558	Nicaragua	0	0	0	0	0	0	0	0	0	0	0	0	0	0	0	0	0	0	0	0	0	0	0	0	0	0	0	3.38644e-08	7.25665e-08	1.555e-07	3.33214e-07	7.14029e-07	1.53006e-06	3.27871e-06	7.0258e-06	1.50553e-05	3.22613e-05	6.91314e-05	0.000148139	0.00031744	0.000752327	0.00175543	0.004096	0.00869718	0.0184047	0.0419575	0.0959028
8	562	Niger	0	0	0	0	0	0	0	0	0.269221	0.358961	0.478615	0.546989	0.62513	0.714434	0.816497	0.933139	1.06644	1.21879	1.39291	1.47029	1.54767	1.66375	1.77983	1.97696	2.11817	2.32151	2.70843	3.09535	3.15222	3.17871	3.20659	3.23601	3.26713	3.30013	3.33524	3.37271	3.41286	3.45606	3.50277	3.55353	3.60905	3.67022	3.73819	3.81448	3.90117	4.0012	4.11889
8	566	Nigeria	0	0	0	0	0	0	0	0	0	0	0	0	0	0	0	0	0	0	0	0	0	0	0	0	0	0	0	0	0	0	0	0	0.57233	0.721837	0.910829	1.14991	1.45259	1.83617	2.32278	2.94086	3.72711	4.72903	6.00852	7.64676	9.75132	12.4665	15.9898
24	570	Niue	0	0	0	0	0	0	0	0	0	0	0	0	0	0	0	0	0	0	0	0	0	0	0	0	0	0	0	0	0	0	0	0	0	0	0	0	0	0	0	0	0	0	0	0	0	0	0
24	574	Norfolk Isl.	0	0	0	0	0	0	0	0	0	0	0	0	0	0	0	0	0	0	0	0	0	0	0	0	0	0	0	0	0	0	0	0	0	0	0	0	0	0	0	0	0	0	0	0	0	0	0
11	578	Norway	0	0	0	0	0	0	0	0	0	0	0	0	0	0	0	0	0	0	0	0	0	0	0	0	0	0	0	0	0	0	0	0	0	0	0	0	0	0	0	0	0	0	0	0	0	0	0
24	580	Northern Mariana	0	0	0	0	0	0	0	0	0	0	0	0	0	0	0	0	0	0	0	0	0	0	0	0	0	0	0	0	0	0	0	0	0	0	0	0	0	0	0	0	0	0	0	0	0	0	0
24	583	Micr.,Fed.St.of	0	0	0	0	0	0	0	0	0	0	0	0	0	0	0	0	0	0	0	0	0	0	0	0	0	0	0	0	0	0	0	0	0	0	0	0	0	0	0	0	0	0	0	0	0	0	0
24	584	Marshall Islands	0	0	0	0	0	0	0	0	0	0	0	0	0	0	0	0	0	0	0	0	0	0	0	0	0	0	0	0	0	0	0	0	0	0	0	0	0	0	0	0	0	0	0	0	0	0	0
24	585	Palau	0	0	0	0	0	0	0	0	0	0	1.73179e-05	3.24711e-05	6.08834e-05	0.000114156	0.000214043	0.000401331	0.000752496	0.00141093	0.00264549	0.0049603	0.00930056	0.0174386	0.0326973	0.0613074	0.114951	0.215534	0.404126	0.757736	0.797841	0.840068	0.88453	0.931345	0.980637	1.03254	1.08719	1.14473	1.20531	1.2691	1.33627	1.4109	1.48969	1.57289	1.66073	1.75348	1.81445	1.87754	1.94282
18	586	Pakistan	0	0	0.0471571	0.117893	0.294732	0.736829	1.84207	4.60518	11.513	28.7824	71.9559	77.2468	82.5377	88.8868	95.2358	101.585	107.934	119.574	131.214	147.086	162.959	169.308	175.657	175.657	198.937	211.635	275.126	338.616	342.087	349.068	356.192	363.461	370.879	378.448	386.171	394.052	402.094	410.3	418.673	427.218	435.936	444.833	453.911	463.175	472.627	482.273	492.115
4	591	Panama	0	0	0	0	0	0	0	0	0	0	0	0	0	0	0	0	0	0	0	0	0	0	0	0	0	0	0	0.00213247	0.0044894	0.00945137	0.0198976	0.0418897	0.0881889	0.185661	0.390865	0.822874	1.73237	3.64709	7.67807	8.5838	9.59636	10.7284	11.9939	13.8191	15.6453	17.1813	20.0504
22	598	Papua New Guinea	0	0	1.94218e-05	4.36989e-05	9.83226e-05	0.000221226	0.000497758	0.00111996	0.0025199	0.00566978	0.012757	0.0200467	0.031502	0.0495031	0.0777906	0.122242	0.192095	0.301864	0.474357	0.745419	1.17137	1.84073	2.89257	4.54547	7.14288	11.2245	17.6386	27.7177	27.4492	27.1688	26.8757	26.5689	26.2476	25.9106	25.5565	25.184	24.7913	24.3766	23.9376	23.4716	22.9755	22.4454	21.8767	21.2635	20.5708	19.8185	18.9937
6	600	Paraguay	0	0	0	0	0	0	0	0	0	0	0	0	0	0	0	0	0	0	0	0	0	0	0	0	0	0	0	2.65668e-08	5.57902e-08	1.16894e-07	2.44414e-07	5.10082e-07	1.06267e-06	2.21036e-06	4.59074e-06	9.52153e-06	1.97232e-05	4.08066e-05	9.24949e-05	0.000206753	0.000457033	0.00100112	0.00217635	0.00452681	0.00940183	0.0195001	0.0403931
6	604	Peru	0	0	0	0	0	0	0	0	0	0	0	0	0	0	0	0	0	0	0	0	0	0	0	0	0	0	0	0.000643042	0.00127218	0.00251685	0.00497929	0.00985091	0.0194888	0.0385563	0.0762789	0.150909	0.298554	0.590653	1.16854	1.44488	2.10097	3.00138	4.28768	6.16488	8.71269	12.8827	21.2239
21	608	Philippines	0	0	0.0699306	0.167833	0.4028	0.96672	2.32013	5.56831	13.3639	32.0734	76.9763	81.6359	86.5775	91.8183	97.3763	103.271	109.522	116.152	123.183	138.58	153.978	164.243	174.509	184.774	195.039	205.304	66.7239	77.0143	76.1818	75.3582	74.5435	73.7376	72.9404	72.1519	71.3719	70.6003	69.837	69.082	68.3352	67.5965	78.6324	89.8656	102.703	118.135	133.566	157.994	208.232
24	612	Pitcairn	0	0	0	0	0	0	0	0	0	0	0	0	0	0	0	0	0	0	0	0	0	0	0	0	0	0	0	0	0	0	0	0	0	0	0	0	0	0	0	0	0	0	0	0	0	0	0
12	616	Poland	0	0	0	0	0	0	0	0	0	0	0	0	0	0	0	0	0	0	0	0	0	0	0	0	0	0	0	0	0	0	0	0	0	0	0	0	0	0	0	0	0	0	0	0	0	0	0
11	620	Portugal	0	0	4.89518e-16	1.46855e-15	4.40566e-15	1.3217e-14	3.9651e-14	1.18953e-13	3.56859e-13	1.07058e-12	3.21173e-12	7.13718e-12	1.42744e-11	2.85487e-11	5.70974e-11	1.02775e-10	1.82712e-10	3.65423e-10	7.30847e-10	1.82712e-09	4.38508e-09	1.09627e-08	2.63105e-08	7.30847e-08	1.05242e-07	3.07631e-07	9.81361e-07	2.0207e-06	5.25833e-06	1.08638e-05	2.21931e-05	4.53364e-05	9.26128e-05	0.000189447	0.000387501	0.000792551	0.00162089	0.00331475	0.00676336	0.0138037	0.029096	0.0614504	0.12618	0.27131	0.587896	1.27586	2.80818
8	624	Guinea-Bissau	0	0	1.71413e-06	3.8568e-06	8.67779e-06	1.9525e-05	4.39313e-05	9.88455e-05	0.000222402	0.000500405	0.00112591	0.00193013	0.0033088	0.00567223	0.00972383	0.0166694	0.0285761	0.0489877	0.0839789	0.143964	0.246795	0.423077	0.725275	1.24333	2.13142	3.65387	6.26377	10.7379	10.9055	11.0829	11.271	11.4711	11.6845	11.9128	12.158	12.4224	12.7086	13.02	13.3607	13.7358	14.1518	14.6171	15.1427	15.7436	16.4404	17.2632	18.2573
21	626	East Timor	0	0	5.75069e-07	1.07825e-06	2.02173e-06	3.79074e-06	7.10764e-06	1.33268e-05	2.49878e-05	4.68521e-05	8.78477e-05	0.000164714	0.00030884	0.000579074	0.00108576	0.00203581	0.00381714	0.00715714	0.0134196	0.0251618	0.0471784	0.0884595	0.165862	0.31099	0.583107	1.09333	2.04999	3.84372	3.88163	3.91903	3.95585	3.99203	4.02747	4.0621	4.0958	4.12849	4.16005	4.19035	4.21925	4.53197	4.86573	5.22159	5.60062	6.00384	6.17493	6.34673	6.51863
4	630	Puerto Rico	0	0	0	0	0	0	0	0	0	0	0	0	0	0	0	0	0	0	0	0	0	0	0	0	0	0	0.00131596	0.00197395	0.00257211	0.00335154	0.00436716	0.00569054	0.00741495	0.0096619	0.0125897	0.0164048	0.021376	0.0278535	0.036294	0.0472922	0.0570993	0.0669064	0.0840619	0.102524	0.122948	0.143782	0.164318
17	634	Qatar	0	0	0	0	0	0	0	0	0	0	0	0	0	0	0	0	0	0	0	0	0	0	0	0	0	0	0	0	0	0	0	0	0	0	0	0	0	0	0	0	0	0	0	0	0	0	0
9	638	Reunion	0	0	0	0	0	0	0	0	0	0	0	0	0	0	0	0	0	0	0	0	0	0	0	0	0	0	0	0	0	0	0	0	0	0	0	0	0	0	0	0	0	0	0	0	0	0	0
12	642	Romania	0	0	0	0	0	0	0	0	0	0	0	0	0	0	0	0	0	0	0	0	0.460694	0.518281	0.575868	0.863802	0.719835	1.15174	1.15174	1.43967	1.7225	1.84554	1.97736	2.1186	2.26993	2.43207	2.60579	2.79192	2.99134	3.20501	3.43394	3.67922	4.08089	4.33595	4.60694	4.94642	5.28589	5.62968	5.97348
16	643	Russian Fed.	0	0	7.88164e-05	0.000137929	0.000241377	0.000422413	0.000739234	0.00129369	0.00226405	0.00396236	0.00693495	0.0117053	0.0195168	0.0322267	0.0528073	0.0794509	0.119896	0.196812	0.323909	0.520568	0.832908	1.24936	1.87404	1.93949	1.93949	2.49872	3.12341	3.53986	4.00989	4.47993	4.94997	5.42	5.89004	6.36007	6.83011	7.30015	7.77018	8.24022	8.71025	9.29509	9.93911	11.7735	12.7631	14.662	15.9022	18.3085	21.0451
9	646	Rwanda	0	0	0	0	0	0	0	0	0	0	0	0	0	0	0	0	0	0	0	0	0	0	0	0	0	0	0	0	0	0	0	0	0	0	0	0	0	0	0	0	0	0	0	0	0	0	0
8	654	St. Helena	0	0	0	0	0	0	0	0	0	0	0	0	0	0	0	0	0	0	0	0	0	0	0	0	0	0	0	0	0	0	0	0	0	0	0	0	0	0	0	0	0	0	0	0	0	0	0
4	659	St.Kitts & Nevis	0	0	0	0	0	0	0	0	0	0	0	0	0	0	0	0	0	0	0	0	0	0	0	0	0	0	0	0	0	0	0	0	0	0	0	0	0	0	0	0	0	0	0	0	0	0	0
4	660	Anguilla	0	0	0	0	0	0	0	0	0	0	0	0	0	0	0	0	0	0	0	0	0	0	0	0	0	0	0	0	0	0	0	0	0	0	0	0	0	0	0	0	0	0	0	0	0	0	0
4	662	Saint Lucia	0	0	0	0	0	0	0	0	0	0	0	0	0	0	0	0	0	0	0	0	0	0	0	0	0	0	0	0	0	0	0	0	0	0	0	0	0	0	0	0	0	0	0	0	0	0	0
2	666	St.Pierre & Miq.	0	0	0	0	0	0	0	0	0	0	0	0	0	0	0	0	0	0	0	0	0	0	0	0	0	0	0	0	0	0	0	0	0	0	0	0	0	0	0	0	0	0	0	0	0	0	0
4	670	St.Vin. & Gren.	0	0	0	0	0	0	0	0	0	0	0	0	0	0	0	0	0	0	0	0	0	0	0	0	0	0	0	0	0	0	0	0	0	0	0	0	0	0	0	0	0	0	0	0	0	0	0
11	674	San Marino	0	0	0	0	0	0	0	0	0	0	0	0	0	0	0	0	0	0	0	0	0	0	0	0	0	0	0	0	0	0	0	0	0	0	0	0	0	0	0	0	0	0	0	0	0	0	0
8	678	Sao Tome & Pr.	0	0	0	0	0	0	0	0	0	0	0	0	0	0	0	0	0	0	0	0	0	0	0	0	0	0	0	0	0	0	0	0	0	0	0	0	0	0	0	0	0	0	0	0	0	0	0
17	682	Saudi Arabia	0	0	0	0	0	0	0	0	0	0	0	0	0	0	0	0	0	0	0	0	0	0	0	0	0	0	0	0	0	0	0	0	0	0	0	0	0	0	0	0	0	0	0	0	0	0	0
8	686	Senegal	0	0	0	0	0	0	0	0	0.0262758	0.0350344	0.0467125	0.0583907	0.0729883	0.0912354	0.114044	0.142555	0.178194	0.222743	0.278428	0.348035	0.435044	0.543805	0.679757	1.27454	2.38977	4.48082	8.40153	15.7529	15.893	16.0425	16.2025	16.3741	16.5587	16.758	16.9739	17.2088	17.4655	17.7474	18.0587	18.4047	18.7921	19.2295	19.7283	20.3041	20.9781	21.7815	22.7608
9	690	Seychelles	0	0	0	0	0	0	0	0	0	0	0	0	0	0	0	0	0	0	0	0	0	0	0	0	0	0	0	0	0	0	0	0	0	0	0	0	0	0	0	0	0	0	0	0	0	0	0
8	694	Sierra Leone	0	0	6.44956e-07	1.28991e-06	2.57982e-06	5.15965e-06	1.03193e-05	2.06386e-05	4.12772e-05	8.25544e-05	0.000165109	0.000275181	0.000458635	0.000764392	0.00127399	0.00212331	0.00353885	0.00589809	0.00983015	0.0163836	0.027306	0.0455099	0.0758499	0.126416	0.210694	0.351157	0.585262	0.975436	1.08406	1.20478	1.33894	1.48804	1.65375	1.83791	2.04257	2.27003	2.52282	2.80375	3.11597	3.46296	3.84858	4.27715	4.75343	5.28276	8.21944	12.7886	19.8978
21	702	Singapore	0	0	0	0	0	0	0	0	0	0	0	0	0	0	0	0	0	0	0	0	0	0	0	0	0	0	0	0	0	0	0	0	0	0	0	0	0	0	0	0	0	0	0	0	0	0	0
12	703	Slovakia	0	0	0	0	0	0	0	0	0	0	0	0	0	0	0	0	0	0	0	0	0	0	0	0	0	0	0	0	0	0	0	0	0	0	0	0	0	0	0	0	0	0	0	0	0	0	0
21	704	Viet Nam	0	0	0.0105512	0.0282357	0.0755929	0.202474	0.542609	1.45499	3.9041	10.4832	28.1723	30.3229	32.6376	35.129	37.8106	40.6969	43.8036	47.1473	50.7464	53.5656	56.3849	73.3003	90.2158	107.131	124.047	140.962	176.203	211.443	232.3	253.156	274.013	294.869	315.726	336.582	357.439	378.295	399.152	420.009	440.865	461.722	517.782	573.843	629.904	685.964	742.025	897.207	1052.39
12	705	Slovenia	0	0	0	0	0	0	0	0	0	0	0	0	0	0	0	0	0	0	0	0	0	0	0	0	0	0	0	0	0	0	0	0	0	0	0	0	0	0	0	0	0	0	0	0	0	0	0
9	706	Somalia	0	0	0	0	0	0	0	0	0	0	0	0	0	0	0	0	0	0	0	0	0	0	0	0	0	0	0	0	0	0	0	0	0	0	0	0	0	0	0	0	0	0	0	0	0	0	0
10	710	South Africa	0	0	0	0	0	0	0	0	0	0	0	0	0	0	0	0	0	0	0	0	0	0	0	0	0	0	0	0	0	0	0	0	0	0	0	0	0	0	0	0	0	0	0	0	0	0	0
10	716	Zimbabwe	0	0	1.39811e-06	3.14576e-06	7.07795e-06	1.59254e-05	3.58321e-05	8.06223e-05	0.0001814	0.00040815	0.000918338	0.00157429	0.00269879	0.0046265	0.00793114	0.0135962	0.0233078	0.0399563	0.0684965	0.120794	0.208266	0.312399	0.468599	0.702899	1.05435	3.16304	5.14786	8.32672	8.3591	8.40369	8.45065	8.50023	8.55271	8.60843	8.66778	8.73125	8.7994	8.87291	8.95265	9.03967	9.13533	9.24136	9.36009	9.49465	9.64946	9.83095	10.049
11	724	Spain	0	0	0	0	0	0	0	0	0	0	0	0	0	0	0	0	0	0	0	0	8.12999	9.14623	11.1787	15.2437	11.1787	13.2112	17.2762	16.26	18.3487	18.8584	19.3822	19.9206	20.474	21.0427	21.6272	22.228	22.8454	23.48	24.1322	24.8026	26.5058	26.4633	28.894	31.8411	33.5496	35.3419	36.9777
7	732	Western Sahara	0	0	0	0	0	0	0	0	0	0	0	0	0	0	0	0	0	0	0	0	0	0	0	0	0	0	0	0	0	0	0	0	0	0	0	0	0	0	0	0	0	0	0	0	0	0	0
9	736	Sudan	0	0	0	0	0	0	0	0	0	0	0	0	0	0	0	0	0	0	0	0	0	0	0	0	0	0	0	0	0	0	0	0	0	0	0	0	0	0	0	0	0	0	0	0	0	0	0
6	740	Suriname	0	0	0	0	0	0	0	0	0	0	0	0	0	0	0	0	0	0	0	0	0	0	0	0	0	0	0	3.65409e-07	7.97257e-07	1.73947e-06	3.79521e-06	8.28045e-06	1.80664e-05	3.94177e-05	8.60022e-05	0.000187641	0.000409399	0.000893234	0.00194887	0.00417616	0.00894891	0.0191762	0.0410919	0.0880542	0.195676	0.434835	0.966301
11	744	Svalbard & Jan Mayen Isl.	0	0	0	0	0	0	0	0	0	0	0	0	0	0	0	0	0	0	0	0	0	0	0	0	0	0	0	0	0	0	0	0	0	0	0	0	0	0	0	0	0	0	0	0	0	0	0
10	748	Swaziland	0	0	1.66331e-07	3.74245e-07	8.42051e-07	1.89461e-06	4.26288e-06	9.59148e-06	2.15808e-05	4.85569e-05	0.000109253	0.000164428	0.000247466	0.000372441	0.00056053	0.000843607	0.00126964	0.00191083	0.00287583	0.00474513	0.00776475	0.0139766	0.024459	0.0419297	0.0707563	0.117927	0.206373	0.442227	0.508361	0.544321	0.582539	0.623106	0.666103	0.711598	0.759646	0.810278	0.863497	0.919265	0.977494	1.03803	1.10063	1.16493	1.23042	1.29639	1.36181	1.4253	1.4849
11	752	Sweden	0	0	0	0	0	0	0	0	0	0	0	0	0	0	0	0	0	0	0	0	0	0	0	0	0	0	0	0	0	0	0	0	0	0	0	0	0	0	0	0	0	0	0	0	0	0	0
11	756	Switzerland	0	0	0	0	0	0	0	0	0	0	0	0	0	0	0	0	0	0	0	0	0	0	0	0	0	0	0	0	0	0	0	0	0	0	0	0	0	0	0	0	0	0	0	0	0	0	0
17	760	Syrian Arab Rep.	0	0	0	0	0	0	0	0	0	0	0	0	0	0	0	0	0	0	0	0	0	0	0	0	0	0	0	0	0	0	0	0	0	0	0	0	0	0	0	0	0	0	0	0	0	0	0
15	762	Tajikistan	0	0	2.78295e-05	4.87017e-05	8.52279e-05	0.000149149	0.00026101	0.000456768	0.000799344	0.00139885	0.00244799	0.00393427	0.00632294	0.0101619	0.0163316	0.0262472	0.0421829	0.067794	0.108955	0.171604	0.269663	0.42288	0.689479	1.11696	1.79954	2.88547	4.88668	8.16774	8.64849	9.00579	9.37244	9.74789	10.1314	10.5221	10.9188	11.32	11.7239	12.1283	12.5304	12.9266	13.3129	13.6837	14.0325	14.3507	14.6275	14.8485	14.9949
21	764	Thailand	0	0	0.0193135	0.0434555	0.0977748	0.219993	1.20996	3.95988	10.9997	28.1592	105.597	116.525	127.517	138.573	149.692	160.874	172.119	183.424	194.791	206.218	217.706	262.003	306.547	351.336	396.368	441.641	498.225	555.106	559.662	570.181	580.899	591.818	602.942	614.275	625.82	637.583	649.566	661.775	706.085	750.419	794.776	839.157	883.562	1016.37	1149.25	1282.2	1415.23
8	768	Togo	0	0	3.58264e-05	7.16527e-05	0.000143305	0.000286611	0.000573222	0.00114644	0.00229289	0.00458577	0.00917155	0.0157227	0.0269531	0.0462053	0.0792092	0.135787	0.232778	0.399048	0.684082	1.17271	2.01036	2.29756	2.62578	3.00089	3.42959	3.91953	4.47947	5.11939	5.13651	5.15369	5.17093	5.18822	5.20557	5.22298	5.24045	5.25798	5.27556	5.29321	5.31091	5.35554	5.40054	5.44593	5.49169	5.53784	5.65086	5.76618	5.88386
24	772	Tokelau	0	0	0	0	0	0	0	0	0	0	0	0	0	0	0	0	0	0	0	0	0	0	0	0	0	0	0	0	0	0	0	0	0	0	0	0	0	0	0	0	0	0	0	0	0	0	0
24	776	Tonga	0	0	0	0	0	0	0	0	0	0	0	0	0	0	0	0	0	0	0	0	0	0	0	0	0	0	0	0	0	0	0	0	0	0	0	0	0	0	0	0	0	0	0	0	0	0	0
4	780	Trin. & Tobago	0	0	0	0	0	0	0	0	0	0	0	0	0	0	0	0	0	0	0	0	0	0	0	0	0	0	0.00124524	0.00249047	0.00373571	0.00560356	0.00840535	0.012608	0.018912	0.028368	0.0425521	0.0638281	0.0957421	0.143613	0.21542	0.32313	0.340417	0.382969	0.43084	0.549321	0.667801	0.92372	1.15465
17	784	U.Arab Emirates	0	0	0	0	0	0	0	0	0	0	0	0	0	0	0	0	0	0	0	0	0	0	0	0	0	0	0	0	0	0	0	0	0	0	0	0	0	0	0	0	0	0	0	0	0	0	0
7	788	Tunisia	0	0	0	0	0	0	0	0	0	0	0	0	0	0	0	0	0	0	0	0	0	0	0	0	0	0	0	0	0	0	0	0	0	0	0	0	0	0	0	0	0	0	0	0	0	0	0
13	792	Turkey	0	0	3.72414e-05	8.37932e-05	0.000188535	0.000895539	0.00226242	0.00477228	0.0143168	0.0322129	0.0644258	0.104692	0.169118	0.235557	0.326156	0.448464	0.611542	1.00904	1.65116	2.73474	4.4891	4.92253	8.7073	15.0462	12.1206	13.061	16.718	17.7629	17.9704	18.2309	18.4951	18.7631	19.0351	19.3109	19.5908	19.8747	20.1628	20.455	20.7514	21.0522	21.8477	22.601	23.3804	24.1866	25.0206	25.5692	26.091
15	795	Turkmenistan	0	0	0.000188671	0.000330174	0.000577805	0.00101116	0.00176953	0.00309667	0.00541918	0.00948356	0.0165962	0.0266725	0.0428666	0.0688927	0.11072	0.177943	0.285981	0.459612	0.738662	1.14262	1.76586	1.89051	2.01516	2.13981	2.28523	2.49298	2.90848	3.2201	3.43642	3.62733	3.82885	4.04156	4.26609	4.5031	4.75327	5.01734	5.29608	5.59031	5.90088	6.22871	6.57475	6.94001	7.32557	7.73254	8.16213	8.61558	9.09422
4	796	Turks & Caicos	0	0	0	0	0	0	0	0	0	0	0	0	0	0	0	0	0	0	0	0	0	0	0	0	0	0	0	0	0	0	0	0	0	0	0	0	0	0	0	0	0	0	0	0	0	0	0
24	798	Tuvalu	0	0	0	0	0	0	0	0	0	0	0	0	0	0	0	0	0	0	0	0	0	0	0	0	0	0	0	0	0	0	0	0	0	0	0	0	0	0	0	0	0	0	0	0	0	0	0
9	800	Uganda	0	0	0	0	0	0	0	0	0	0	0	0	0	0	0	0	0	0	0	0	0	0	0	0	0	0	0	0	0	0	0	0	0	0	0	0	0	0	0	0	0	0	0	0	0	0	0
14	804	Ukraine	0	0	0	0	0	0	0	0	0	0	0	0	0	0	0	0	0	0	0	0	0	0	0	0	0	0	0	0	0	0	0	0	0	0	0	0	0	0	0	0	0	0	0	0	0	0	0
12	807	TFYR Macedonia	0	0	0	0	0	0	0	0	0	0	0	0	0	0	0	0	0	0	0	0	0	0	0	0	0	0	0	0	0	0	0	0	0	0	0	0	0	0	0	0	0	0	0	0	0	0	0
7	818	Egypt	0	0	0	0	0	0	0	0	5.42002	10.84	32.5201	34.9592	37.3982	34.9592	32.5201	28.4551	24.3901	27.6421	30.8941	35.7722	40.6502	35.3657	32.5201	38.2112	32.9266	32.5201	40.6502	36.5852	35.7722	34.9592	34.1462	33.3332	32.5201	31.7071	30.8941	30.0811	29.2681	28.4551	31.7071	34.9592	38.2112	41.4632	44.7152	39.8235	45.5126	52.0144	72.3
11	826	United Kingdom	0	0	0	0	0	0	0	0	0	0	0	0	0	0	0	0	0	0	0	0	0	0	0	0	0	0	0	0	0	0	0	0	0	0	0	0	0	0	0	0	0	0	0	0	0	0	0
10	834	U.R. Tanzania	0	0	7.35808e-05	0.000145007	0.000287948	0.000576447	0.00116388	0.00237082	0.00487334	0.0101096	0.0211654	0.0377543	0.0673464	0.120136	0.214309	0.382314	0.682042	1.21678	2.17085	3.79898	6.51254	10.3794	14.2462	18.113	21.9798	14.2462	17.2989	20.3517	20.6258	20.864	21.1156	21.3819	21.6645	21.9655	22.2869	22.6314	23.0021	23.4029	23.8383	24.3142	24.8377	25.4181	26.0674	26.8018	27.6433	28.6237	29.7898
2	840	United States	0	0	0	0	0	0	0	0	0	0	0	0	0	0	0	0	0	0	0	0	0	0	0	0	0	0	0	3.05107e-06	9.03594e-06	2.39395e-05	5.96141e-05	0.000142698	0.000332337	0.000758556	0.00170487	0.00378527	0.0083216	0.021277	0.0551032	0.142869	0.373089	0.97137	2.56564	6.87784	16.8071	43.6379	108.924
4	850	U.S. Virgin Is.	0	0	0	0	0	0	0	0	0	0	0	0	0	0	0	0	0	0	0	0	0	0	0	0	0	0	0	0	0	0	0	0	0	0	0	0	0	0	0	0	0	0	0	0	0	0	0
8	854	Burkina Faso	0	0	6.08203e-05	0.000136846	0.000307903	0.000692781	0.00155876	0.0035072	0.00789121	0.0177552	0.0399492	0.0679137	0.115453	0.196271	0.33366	0.567222	0.964277	1.63927	2.78676	4.73749	8.05374	9.12757	10.3446	11.7239	13.287	15.0586	17.0665	19.342	19.4067	19.5862	19.7754	19.9751	20.1866	20.4111	20.6502	20.9058	21.1798	21.4751	21.7948	22.1427	22.5239	22.9446	23.4128	23.9395	24.5393	25.2333	26.052
6	858	Uruguay	0	0	0	0	0	0	0	0	0	0	0	0	0	0	0	0	0	0	0	0	0	0	0	0	0	0	0	5.99711e-09	1.26255e-08	2.658e-08	5.59579e-08	1.17806e-07	2.48013e-07	5.22132e-07	1.09923e-06	2.31416e-06	4.87191e-06	1.02567e-05	2.1593e-05	4.54589e-05	0.000122739	0.000327304	0.000872811	0.0031408	0.00907194	0.0245445	0.0725755
15	860	Uzbekistan	0	0	0.000343111	0.000600445	0.00105078	0.00183886	0.00321801	0.00563152	0.00985516	0.0172465	0.0301814	0.0485058	0.0779558	0.125286	0.201353	0.323603	0.520076	0.835836	1.34331	2.09993	3.27735	3.53225	3.78716	4.04206	4.29697	4.58829	5.24376	5.89922	6.28113	6.63008	6.99842	7.38722	7.79763	8.23083	8.6881	9.17077	9.68025	10.218	10.7857	11.3849	12.0174	12.6851	13.3898	14.1337	14.9189	15.7477	16.6226
6	862	Venezuela	0	0	0	0	0	0	0	0	0	0	0	0	0	0	0	0	0	0	0	0	0	0	0	0	0	0	0	1.14972e-07	2.32854e-07	4.71603e-07	9.55145e-07	1.93447e-06	3.91792e-06	7.93502e-06	1.60709e-05	3.25487e-05	6.59215e-05	0.000133512	0.000270404	0.000663718	0.00162913	0.00399876	0.00981515	0.0240917	0.0542064	0.121964	0.27707
24	876	Wallis & Futuna	0	0	0	0	0	0	0	0	0	0	0	0	0	0	0	0	0	0	0	0	0	0	0	0	0	0	0	0	0	0	0	0	0	0	0	0	0	0	0	0	0	0	0	0	0	0	0
24	882	Samoa, Western	0	0	0	0	0	0	0	0	0	0	0	0	0	0	0	0	0	0	0	0	0	0	0	0	0	0	0	0	0	0	0	0	0	0	0	0	0	0	0	0	0	0	0	0	0	0	0
17	887	Yemen	0	0	0	0	0	0	0	0	0	0	0	0	0	0	0	0	0	0	0	0	0	0	0	0	0	0	0	0	0	0	0	0	0	0	0	0	0	0	0	0	0	0	0	0	0	0	0
12	891	Union of Serbia and Montenegro	0	0	0	0	0	0	0	0	0	0	0	0	0	0	0	0	0	0	0	0	0	0	0	0	0	0	0	0	0	0	0	0	0	0	0	0	0	0	0	0	0	0	0	0	0	0	0
10	894	Zambia	0	0	0	0	0	0	0	0	0	0	0	0	0	0	0	0	0	0	0	0	0	0	0	0	0	0	0	0	0	0	0	0	0	0	0	0	0	0	0	0	0	0	0	0	0	0	0
		Total	0	0	1.00413	16.7023	31.7464	60.9359	122.117	252.16	546.831	1026.88	3270.59	3222.42	3129.15	2703.42	3098.69	3523.78	4110.33	4227.18	4266.86	4733.76	4787.57	6539.17	7181.71	6793.74	7052.29	8265.39	9382.56	11334.9	11778.2	12322.9	12646.2	13207.7	14320.9	14961	15727.4	17414.9	18187.7	18125.1	20568.5	22059.1	25058.6	27702.6	31534.3	35387.4	38684.2	44661.9	55580.1
		Barker and Herdt (1985), http://books.google.nl/books?id=H2MbKYjymI4C&pg=PA42&dq=historical+rice+area+india&hl=nl&sa=X&ei=iN-_U_3JA4ewOZvKgZgD&ved=0CDUQ6AEwAw#v=onepage&q=historical%20rice%20area%20india&f=false
Total rice area estimate, in 1000 ha			-10000	-9000	-8000	-7000	-6000	-5000	-4000	-3000	-2000	-1000	0	100	200	300	400	500	600	700	800	900	1000	1100	1200	1300	1400	1500	1600	1700	1710	1720	1730	1740	1750	1760	1770	1780	1790	1800	1810	1820	1830	1840	1850	1860	1870	1880	1890
	1	Canada	0	0	0	0	0	0	0	0	0	0	0	0	0	0	0	0	0	0	0	0	0	0	0	0	0	0	0	0	0	0	0	0	0	0	0	0	0	0	0	0	0	0	0	0	0	0	0
	2	USA	0	0	0	0	0	0	0	0	0	0	0	0	0	0	0	0	0	0	0	0	0	0	0	0	0	0	0	3.05107e-06	9.03594e-06	2.39395e-05	5.96141e-05	0.000142698	0.000332337	0.000758556	0.00170487	0.00378527	0.0083216	0.021277	0.0551032	0.142869	0.373089	0.97137	2.56564	6.87784	16.8071	43.6379	108.924
	3	Mexico	0	0	0	0	0	0	0	0	0	0	0	0	0	0	0	0	0	0	0	0	0	0	0	0	0	0	3.8602	15.4408	16.7366	18.0324	19.3282	20.624	21.9198	23.2156	24.5114	25.8072	27.103	28.3987	29.6945	30.9903	32.2861	33.5819	34.8777	36.1735	37.4693	38.7651	45.7403
	4	Rest Central America	0	0	0	0	0	0	0	0	0	0	0	0	0	0	0	0	0	0	0	0	0	0	0	0	0	0	0.323273	2.8326	2.92404	3.02324	3.13479	3.26757	3.4392	3.68503	4.07679	4.80468	6.11441	8.62382	13.6171	15.0051	16.6748	18.5504	20.688	23.7532	28.2255	33.5656	42.0452
	5	Brazil	0	0	0	0	0	0	0	0	0	0	0	0	0	0	0	0	0	0	0	0	0	0	0	0	0	0	0	3.81885e-06	8.78627e-06	2.03198e-05	4.72417e-05	0.00011042	0.000259473	0.000612969	0.00145561	0.00347421	0.00833283	0.0200799	0.0514229	0.126305	0.320791	0.778832	1.83425	4.22658	9.58254	21.3205	52.9683
	6	Rest South America	0	0	0	0	0	0	0	0	0	0	0	0	0	0	0	0	0	0	0	0	0	0	0	0	0	0	0	0.0422035	0.0496215	0.0611447	0.0806645	0.116044	0.183198	0.314367	0.574906	1.09733	2.15043	4.2794	8.72043	10.4469	12.8409	14.1128	15.8624	20.1806	21.8668	25.9406	42.1699
	7	Northern Africa	0	0	1.13617e-05	2.55637e-05	5.75184e-05	0.000129416	0.000291187	0.000655171	5.4215	10.8434	32.5276	34.9711	37.4173	34.9899	32.5694	28.5341	24.5166	27.8449	31.2191	36.3026	41.5103	36.1828	33.2943	39.0756	33.7008	33.1653	41.6178	37.3378	36.5584	35.7791	34.9997	34.2204	33.441	32.6617	31.8823	31.103	30.3236	29.5443	32.83	36.1156	39.5749	43.0341	46.4933	41.8089	47.7052	54.4142	74.9071
	8	Western Africa	0	0	0.000360891	0.000748845	0.00156285	0.0032806	0.00692598	0.0147051	0.326892	0.461388	0.670751	0.856164	1.13293	1.56383	2.26045	3.42318	5.41541	8.90171	15.1073	24.4335	39.8569	49.8874	63.6654	84.1806	116.76	166.955	246.221	376.657	378.892	380.698	382.661	384.798	387.699	390.393	393.37	396.675	400.363	404.503	409.182	414.618	420.867	428.124	436.646	446.778	461.477	480.484	505.652
	9	Eastern Africa	0	0	2.68086e-07	6.00425e-07	1.34542e-06	3.01611e-06	6.76409e-06	1.51749e-05	3.40549e-05	7.64462e-05	0.000171649	0.000512628	0.00153282	0.00458742	0.0137382	0.0411619	0.123371	0.369862	1.10904	2.50316	5.01414	10.6454	20.6544	38.0111	67.5609	132.928	242.125	428.194	431.089	431.906	432.775	433.703	434.661	435.587	436.601	437.715	438.946	440.316	441.849	443.579	445.548	447.813	450.452	453.571	457.326	461.949	467.806
	10	Southern Africa	0	0	0.000112036	0.000225023	0.00045557	0.000930093	0.0019156	0.00398131	0.00835207	0.0176881	0.037821	0.0678125	0.121935	0.219911	0.397857	0.722146	1.31522	2.40381	4.40939	8.22495	14.7537	20.7968	26.8961	33.0806	39.8109	36.7163	44.5428	53.7108	48.5811	49.3943	50.2318	51.096	51.9897	52.9162	53.8792	54.8832	55.9334	57.0364	58.1997	59.4332	60.7587	63.6541	66.8754	70.4728	73.3862	76.6265	80.2801
	11	Western Europe	0	0	4.89518e-16	1.46855e-15	4.40566e-15	1.3217e-14	3.9651e-14	1.18953e-13	3.56859e-13	1.07058e-12	3.21173e-12	7.13718e-12	1.42744e-11	2.85487e-11	5.70974e-11	1.02775e-10	1.82712e-10	3.65423e-10	7.30847e-10	1.82712e-09	21.633	33.735	42.9322	61.1023	41.3822	49.0141	67.5349	69.6937	73.4282	75.7443	78.1157	80.5441	83.0316	85.5627	88.1567	90.8159	93.5427	96.3396	100.228	104.012	110.567	115.946	124.117	132.616	137.486	145.973	273.417
	12	Central Europe	0	0	0	0	0	0	0	0	0	0	0	0	0	0	0	0	0	0	0	0	2.98901	3.35976	3.93808	5.31185	4.02195	5.33577	5.9298	6.95387	7.67111	8.25385	8.84924	9.45811	10.0813	10.7198	11.3745	12.0464	12.7368	13.4468	14.1777	14.9309	16.425	17.8724	18.9668	19.9341	21.0207	22.8691	24.8588
	13	Turkey	0	0	3.72414e-05	8.37932e-05	0.000188535	0.000895539	0.00226242	0.00477228	0.0143168	0.0322129	0.0644258	0.104692	0.169118	0.235557	0.326156	0.448464	0.611542	1.00904	1.65116	2.73474	4.4891	4.92253	8.7073	15.0462	12.1206	13.061	16.718	17.7629	17.9704	18.2309	18.4951	18.7631	19.0351	19.3109	19.5908	19.8747	20.1628	20.455	20.7514	21.0522	21.8477	22.601	23.3804	24.1866	25.0206	25.5692	26.091
	14	Ukraine +	0	0	0	0	0	0	0	0	0	0	0	0	0	0	0	0	0	0	0	0	0	0	0	0	0	0	0	0	0	0	0	0	0	0	0	0	0	0	0	0	0	0	0	0	0	0	0
	15	Asia-Stan	0	0	0.000577314	0.0010103	0.00176802	0.00309404	0.00541458	0.00947551	0.0165821	0.0290187	0.0507828	0.0816152	0.131167	0.210805	0.338793	0.544489	0.875071	1.40636	2.9273	4.54597	7.0515	7.63194	8.32577	9.33397	10.6522	12.4895	15.9196	20.5258	21.594	22.4812	23.4087	24.3777	25.3893	26.4445	27.5442	28.689	29.8794	31.1155	32.397	33.7232	35.0925	36.5026	37.9499	39.4292	40.9332	43.1847	45.3024
	16	Russia +	0	0	7.88164e-05	0.000137929	0.000241377	0.000422413	0.000739234	0.00129369	0.00226405	0.00396236	0.00738684	0.0124316	0.020684	0.0341025	0.055822	0.0842961	0.127683	0.209326	0.344021	0.552453	0.88331	1.32497	1.97485	2.06549	2.04029	2.62473	3.27461	3.71627	4.12483	4.60444	5.08485	5.56613	6.04834	6.53157	7.0159	7.50142	7.98822	8.47643	8.96615	9.57231	10.2394	12.0989	13.1156	15.0438	16.3159	18.7566	21.5306
	17	Middle East	0	0	0.000162109	0.000296511	0.000808658	0.00225992	0.00736015	0.0169956	0.0389243	0.0785327	0.148856	0.23331	0.365004	0.560307	0.859662	1.29634	1.95477	3.49823	6.09645	8.76386	12.5746	15.1856	19.3483	18.8359	28.2474	43.195	78.9065	115.442	118.958	120.124	121.259	122.358	123.417	124.43	125.392	126.297	127.137	127.905	128.768	129.549	134.621	139.379	143.803	147.87	151.962	171.378	189.675
	18	India +	0	0	0.111639	10.8936	20.8013	39.9322	77.054	149.435	291.264	570.625	1123.97	1184.75	1245.55	1308.68	1371.86	1435.1	1498.43	1573.38	1648.5	1733.02	1817.89	1884.37	1952.03	1999.85	2103.19	2189.64	2403.84	2954.75	3017.26	3079.94	3142.97	3206.33	3270.05	3334.12	3398.55	3463.35	3528.52	3594.08	4440.45	5445.59	7143.77	8700.35	11559.2	14943.6	19361.3	24271.5	32926.9
	19	Korea	0	0	0	3.63478	4.30339	5.07914	5.9738	6.99835	8.1618	9.46958	10.9211	14.4275	19.0851	25.2795	33.5281	44.5251	59.2032	78.8166	105.053	117.196	129.119	153.624	203.073	150.986	174.612	197.798	245.05	303.565	333.396	355.047	378.129	402.739	428.979	456.96	486.797	518.616	552.551	588.743	627.347	668.524	676.844	678.115	679.388	685.156	690.917	693.594	697.252
	20	China +	0	0	0.670918	1.67144	4.16687	10.3937	25.9375	64.7499	161.687	242.906	1618.56	1436.12	1206.87	614.341	841.036	1044.07	1406.55	1168.75	919.333	1113.03	1034.2	2544.59	2910.12	2261.95	2018.63	2585.68	2779.23	2865.31	3003.88	3444.18	3661.62	4115.71	5119.19	5652.91	6310.28	7885.64	8542.58	8358.64	9775.86	10087.6	11099.9	11740.8	12263.9	12063	10261.3	10385.6	10712.2
	21	Southeastern Asia	0	0	0.109581	0.26426	1.96446	4.42959	10.7616	25.7669	61.0972	145.209	378.795	409.592	441.897	475.822	511.487	549.027	588.585	630.322	674.413	721.737	769.132	876.629	984.417	1090.12	1198.8	1307.95	1319.53	1481.16	1513.53	1551.93	1590.56	1629.42	1668.52	1707.86	1747.46	1787.32	1827.44	1867.85	1942.02	2016.56	2232.61	2615.71	3000.97	3477.79	3955.01	4573.71	5561.8
	22	Indonesia +	0	0	0.0354534	0.0664825	0.124671	0.233795	0.438449	0.822278	9.03525	25.2563	55.4409	60.2982	65.1596	70.0275	74.9058	79.8002	84.72	89.6797	94.7022	99.8232	105.099	117.316	129.915	143.116	183.82	226.009	253.208	291.001	293.504	295.995	298.474	300.938	303.388	316.908	330.411	343.896	357.36	370.803	389.763	408.697	427.601	446.471	465.302	586.631	707.88	829.069	950.187
	23	Japan	0	0	0.0751935	0.169185	0.380667	0.856501	1.92713	4.33604	9.75608	21.9512	49.3902	80.907	111.225	171.445	229.055	336.175	437.901	640.585	761.991	860.889	781.36	778.949	772.384	841.612	1016.82	1262.6	1614.29	2289.95	2457.23	2426.5	2394.98	2362.6	2329.31	2279.21	2228.54	2177.24	2125.24	2072.46	2091.43	2106.5	2117.37	2123.65	2124.93	2144.82	2157.16	2239.32	2725
	24	Oceania	0	0	4.60141e-10	8.62763e-10	1.61768e-09	3.03315e-09	5.68716e-09	1.06634e-08	1.99939e-08	3.74886e-08	1.73882e-05	3.26293e-05	6.12393e-05	0.000114957	0.000215845	0.000405384	0.000761616	0.00143145	0.00269166	0.00506418	0.0095343	0.0179645	0.0338806	0.0639698	0.120942	0.229012	0.434452	0.825971	0.882026	0.943878	1.01246	1.08891	1.17456	1.27104	1.38026	1.50452	1.64657	2.01912	2.18943	2.27543	2.39034	2.5496	2.87436	3.5121	4.06022	4.56329	5.3577
	25	Greenland	0	0	0	0	0	0	0	0	0	0	0	0	0	0	0	0	0	0	0	0	0	0	0	0	0	0	0	0	0	0	0	0	0	0	0	0	0	0	0	0	0	0	0	0	0	0	0
	26	Antarctica	0	0	0	0	0	0	0	0	0	0	0	0	0	0	0	0	0	0	0	0	0	0	0	0	0	0	0	0	0	0	0	0	0	0	0	0	0	0	0	0	0	0	0	0	0	0	0
			-10000	-9000	-8000	-7000	-6000	-5000	-4000	-3000	-2000	-1000	0	100	200	300	400	500	600	700	800	900	1000	1100	1200	1300	1400	1500	1600	1700	1710	1720	1730	1740	1750	1760	1770	1780	1790	1800	1810	1820	1830	1840	1850	1860	1870	1880	1890
		HYDE 3.2	0	0	1.00413	16.7023	31.7464	60.9359	122.117	252.16	546.831	1026.88	3270.59	3222.42	3129.15	2703.42	3098.69	3523.78	4110.33	4227.18	4266.86	4733.76	4787.57	6539.17	7181.71	6793.74	7052.29	8265.39	9382.56	11334.9	11778.2	12322.9	12646.2	13207.7	14320.9	14961	15727.4	17414.9	18187.7	18125.1	20568.5	22059.1	25058.6	27702.6	31534.3	35387.4	38684.2	44661.9	55580.1
		Fuller et al (2010), wet rice							50	200	400	700	2300										5000
		Fuller et al (2010), total rice							100	200	500	800	2500										5300
		Barker and Herdt (1985), http://books.google.nl/books?id=H2MbKYjymI4C&pg=PA42&dq=historical+rice+area+india&hl=nl&sa=X&ei=iN-_U_3JA4ewOZvKgZgD&ved=0CDUQ6AEwAw#v=onepage&q=historical%20rice%20area%20india&f=false
		FAO (2015)
Total rice area estimate, in Mha			-10000	-9000	-8000	-7000	-6000	-5000	-4000	-3000	-2000	-1000	0	100	200	300	400	500	600	700	800	900	1000	1100	1200	1300	1400	1500	1600	1700	1710	1720	1730	1740	1750	1760	1770	1780	1790	1800	1810	1820	1830	1840	1850	1860	1870	1880	1890
	1	Canada	0	0	0	0	0	0	0	0	0	0	0	0	0	0	0	0	0	0	0	0	0	0	0	0	0	0	0	0	0	0	0	0	0	0	0	0	0	0	0	0	0	0	0	0	0	0	0
	2	USA	0	0	0	0	0	0	0	0	0	0	0	0	0	0	0	0	0	0	0	0	0	0	0	0	0	0	0	3.05107e-09	9.03594e-09	2.39395e-08	5.96141e-08	1.42698e-07	3.32337e-07	7.58556e-07	1.70487e-06	3.78527e-06	8.3216e-06	2.1277e-05	5.51032e-05	0.000142869	0.000373089	0.00097137	0.00256564	0.00687784	0.0168071	0.0436379	0.108924
	3	Mexico	0	0	0	0	0	0	0	0	0	0	0	0	0	0	0	0	0	0	0	0	0	0	0	0	0	0	0.0038602	0.0154408	0.0167366	0.0180324	0.0193282	0.020624	0.0219198	0.0232156	0.0245114	0.0258072	0.027103	0.0283987	0.0296945	0.0309903	0.0322861	0.0335819	0.0348777	0.0361735	0.0374693	0.0387651	0.0457403
	4	Rest Central America	0	0	0	0	0	0	0	0	0	0	0	0	0	0	0	0	0	0	0	0	0	0	0	0	0	0	0.000323273	0.0028326	0.00292404	0.00302324	0.00313479	0.00326757	0.0034392	0.00368503	0.00407679	0.00480468	0.00611441	0.00862382	0.0136171	0.0150051	0.0166748	0.0185504	0.020688	0.0237532	0.0282255	0.0335656	0.0420452
	5	Brazil	0	0	0	0	0	0	0	0	0	0	0	0	0	0	0	0	0	0	0	0	0	0	0	0	0	0	0	3.81885e-09	8.78627e-09	2.03198e-08	4.72417e-08	1.1042e-07	2.59473e-07	6.12969e-07	1.45561e-06	3.47421e-06	8.33283e-06	2.00799e-05	5.14229e-05	0.000126305	0.000320791	0.000778832	0.00183425	0.00422658	0.00958254	0.0213205	0.0529683
	6	Rest South America	0	0	0	0	0	0	0	0	0	0	0	0	0	0	0	0	0	0	0	0	0	0	0	0	0	0	0	4.22035e-05	4.96215e-05	6.11447e-05	8.06645e-05	0.000116044	0.000183198	0.000314367	0.000574906	0.00109733	0.00215043	0.0042794	0.00872043	0.0104469	0.0128409	0.0141128	0.0158624	0.0201806	0.0218668	0.0259406	0.0421699
	7	Northern Africa	0	0	1.13617e-08	2.55637e-08	5.75184e-08	1.29416e-07	2.91187e-07	6.55171e-07	0.0054215	0.0108434	0.0325276	0.0349711	0.0374173	0.0349899	0.0325694	0.0285341	0.0245166	0.0278449	0.0312191	0.0363026	0.0415103	0.0361828	0.0332943	0.0390756	0.0337008	0.0331653	0.0416178	0.0373378	0.0365584	0.0357791	0.0349997	0.0342204	0.033441	0.0326617	0.0318823	0.031103	0.0303236	0.0295443	0.03283	0.0361156	0.0395749	0.0430341	0.0464933	0.0418089	0.0477052	0.0544142	0.0749071
	8	Western Africa	0	0	3.60891e-07	7.48845e-07	1.56285e-06	3.2806e-06	6.92598e-06	1.47051e-05	0.000326892	0.000461388	0.000670751	0.000856164	0.00113293	0.00156383	0.00226045	0.00342318	0.00541541	0.00890171	0.0151073	0.0244335	0.0398569	0.0498874	0.0636654	0.0841806	0.11676	0.166955	0.246221	0.376657	0.378892	0.380698	0.382661	0.384798	0.387699	0.390393	0.39337	0.396675	0.400363	0.404503	0.409182	0.414618	0.420867	0.428124	0.436646	0.446778	0.461477	0.480484	0.505652
	9	Eastern Africa	0	0	2.68086e-10	6.00425e-10	1.34542e-09	3.01611e-09	6.76409e-09	1.51749e-08	3.40549e-08	7.64462e-08	1.71649e-07	5.12628e-07	1.53282e-06	4.58742e-06	1.37382e-05	4.11619e-05	0.000123371	0.000369862	0.00110904	0.00250316	0.00501414	0.0106454	0.0206544	0.0380111	0.0675609	0.132928	0.242125	0.428194	0.431089	0.431906	0.432775	0.433703	0.434661	0.435587	0.436601	0.437715	0.438946	0.440316	0.441849	0.443579	0.445548	0.447813	0.450452	0.453571	0.457326	0.461949	0.467806
	10	Southern Africa	0	0	1.12036e-07	2.25023e-07	4.5557e-07	9.30093e-07	1.9156e-06	3.98131e-06	8.35207e-06	1.76881e-05	3.7821e-05	6.78125e-05	0.000121935	0.000219911	0.000397857	0.000722146	0.00131522	0.00240381	0.00440939	0.00822495	0.0147537	0.0207968	0.0268961	0.0330806	0.0398109	0.0367163	0.0445428	0.0537108	0.0485811	0.0493943	0.0502318	0.051096	0.0519897	0.0529162	0.0538792	0.0548832	0.0559334	0.0570364	0.0581997	0.0594332	0.0607587	0.0636541	0.0668754	0.0704728	0.0733862	0.0766265	0.0802801
	11	Western Europe	0	0	4.89518e-19	1.46855e-18	4.40566e-18	1.3217e-17	3.9651e-17	1.18953e-16	3.56859e-16	1.07058e-15	3.21173e-15	7.13718e-15	1.42744e-14	2.85487e-14	5.70974e-14	1.02775e-13	1.82712e-13	3.65423e-13	7.30847e-13	1.82712e-12	0.021633	0.033735	0.0429322	0.0611023	0.0413822	0.0490141	0.0675349	0.0696937	0.0734282	0.0757443	0.0781157	0.0805441	0.0830316	0.0855627	0.0881567	0.0908159	0.0935427	0.0963396	0.100228	0.104012	0.110567	0.115946	0.124117	0.132616	0.137486	0.145973	0.273417
	12	Central Europe	0	0	0	0	0	0	0	0	0	0	0	0	0	0	0	0	0	0	0	0	0.00298901	0.00335976	0.00393808	0.00531185	0.00402195	0.00533577	0.0059298	0.00695387	0.00767111	0.00825385	0.00884924	0.00945811	0.0100813	0.0107198	0.0113745	0.0120464	0.0127368	0.0134468	0.0141777	0.0149309	0.016425	0.0178724	0.0189668	0.0199341	0.0210207	0.0228691	0.0248588
	13	Turkey	0	0	3.72414e-08	8.37932e-08	1.88535e-07	8.95539e-07	2.26242e-06	4.77228e-06	1.43168e-05	3.22129e-05	6.44258e-05	0.000104692	0.000169118	0.000235557	0.000326156	0.000448464	0.000611542	0.00100904	0.00165116	0.00273474	0.0044891	0.00492253	0.0087073	0.0150462	0.0121206	0.013061	0.016718	0.0177629	0.0179704	0.0182309	0.0184951	0.0187631	0.0190351	0.0193109	0.0195908	0.0198747	0.0201628	0.020455	0.0207514	0.0210522	0.0218477	0.022601	0.0233804	0.0241866	0.0250206	0.0255692	0.026091
	14	Ukraine +	0	0	0	0	0	0	0	0	0	0	0	0	0	0	0	0	0	0	0	0	0	0	0	0	0	0	0	0	0	0	0	0	0	0	0	0	0	0	0	0	0	0	0	0	0	0	0
	15	Asia-Stan	0	0	5.77314e-07	1.0103e-06	1.76802e-06	3.09404e-06	5.41458e-06	9.47551e-06	1.65821e-05	2.90187e-05	5.07828e-05	8.16152e-05	0.000131167	0.000210805	0.000338793	0.000544489	0.000875071	0.00140636	0.0029273	0.00454597	0.0070515	0.00763194	0.00832577	0.00933397	0.0106522	0.0124895	0.0159196	0.0205258	0.021594	0.0224812	0.0234087	0.0243777	0.0253893	0.0264445	0.0275442	0.028689	0.0298794	0.0311155	0.032397	0.0337232	0.0350925	0.0365026	0.0379499	0.0394292	0.0409332	0.0431847	0.0453024
	16	Russia +	0	0	7.88164e-08	1.37929e-07	2.41377e-07	4.22413e-07	7.39234e-07	1.29369e-06	2.26405e-06	3.96236e-06	7.38684e-06	1.24316e-05	2.0684e-05	3.41025e-05	5.5822e-05	8.42961e-05	0.000127683	0.000209326	0.000344021	0.000552453	0.00088331	0.00132497	0.00197485	0.00206549	0.00204029	0.00262473	0.00327461	0.00371627	0.00412483	0.00460444	0.00508485	0.00556613	0.00604834	0.00653157	0.0070159	0.00750142	0.00798822	0.00847643	0.00896615	0.00957231	0.0102394	0.0120989	0.0131156	0.0150438	0.0163159	0.0187566	0.0215306
	17	Middle East	0	0	1.62109e-07	2.96511e-07	8.08658e-07	2.25992e-06	7.36015e-06	1.69956e-05	3.89243e-05	7.85327e-05	0.000148856	0.00023331	0.000365004	0.000560307	0.000859662	0.00129634	0.00195477	0.00349823	0.00609645	0.00876386	0.0125746	0.0151856	0.0193483	0.0188359	0.0282474	0.043195	0.0789065	0.115442	0.118958	0.120124	0.121259	0.122358	0.123417	0.12443	0.125392	0.126297	0.127137	0.127905	0.128768	0.129549	0.134621	0.139379	0.143803	0.14787	0.151962	0.171378	0.189675
	18	India +	0	0	0.000111639	0.0108936	0.0208013	0.0399322	0.077054	0.149435	0.291264	0.570625	1.12397	1.18475	1.24555	1.30868	1.37186	1.4351	1.49843	1.57338	1.6485	1.73302	1.81789	1.88437	1.95203	1.99985	2.10319	2.18964	2.40384	2.95475	3.01726	3.07994	3.14297	3.20633	3.27005	3.33412	3.39855	3.46335	3.52852	3.59408	4.44045	5.44559	7.14377	8.70035	11.5592	14.9436	19.3613	24.2715	32.9269
	19	Korea	0	0	0	0.00363478	0.00430339	0.00507914	0.0059738	0.00699835	0.0081618	0.00946958	0.0109211	0.0144275	0.0190851	0.0252795	0.0335281	0.0445251	0.0592032	0.0788166	0.105053	0.117196	0.129119	0.153624	0.203073	0.150986	0.174612	0.197798	0.24505	0.303565	0.333396	0.355047	0.378129	0.402739	0.428979	0.45696	0.486797	0.518616	0.552551	0.588743	0.627347	0.668524	0.676844	0.678115	0.679388	0.685156	0.690917	0.693594	0.697252
	20	China +	0	0	0.000670918	0.00167144	0.00416687	0.0103937	0.0259375	0.0647499	0.161687	0.242906	1.61856	1.43612	1.20687	0.614341	0.841036	1.04407	1.40655	1.16875	0.919333	1.11303	1.0342	2.54459	2.91012	2.26195	2.01863	2.58568	2.77923	2.86531	3.00388	3.44418	3.66162	4.11571	5.11919	5.65291	6.31028	7.88564	8.54258	8.35864	9.77586	10.0876	11.0999	11.7408	12.2639	12.063	10.2613	10.3856	10.7122
	21	Southeastern Asia	0	0	0.000109581	0.00026426	0.00196446	0.00442959	0.0107616	0.0257669	0.0610972	0.145209	0.378795	0.409592	0.441897	0.475822	0.511487	0.549027	0.588585	0.630322	0.674413	0.721737	0.769132	0.876629	0.984417	1.09012	1.1988	1.30795	1.31953	1.48116	1.51353	1.55193	1.59056	1.62942	1.66852	1.70786	1.74746	1.78732	1.82744	1.86785	1.94202	2.01656	2.23261	2.61571	3.00097	3.47779	3.95501	4.57371	5.5618
	22	Indonesia +	0	0	3.54534e-05	6.64825e-05	0.000124671	0.000233795	0.000438449	0.000822278	0.00903525	0.0252563	0.0554409	0.0602982	0.0651596	0.0700275	0.0749058	0.0798002	0.08472	0.0896797	0.0947022	0.0998232	0.105099	0.117316	0.129915	0.143116	0.18382	0.226009	0.253208	0.291001	0.293504	0.295995	0.298474	0.300938	0.303388	0.316908	0.330411	0.343896	0.35736	0.370803	0.389763	0.408697	0.427601	0.446471	0.465302	0.586631	0.70788	0.829069	0.950187
	23	Japan	0	0	7.51935e-05	0.000169185	0.000380667	0.000856501	0.00192713	0.00433604	0.00975608	0.0219512	0.0493902	0.080907	0.111225	0.171445	0.229055	0.336175	0.437901	0.640585	0.761991	0.860889	0.78136	0.778949	0.772384	0.841612	1.01682	1.2626	1.61429	2.28995	2.45723	2.4265	2.39498	2.3626	2.32931	2.27921	2.22854	2.17724	2.12524	2.07246	2.09143	2.1065	2.11737	2.12365	2.12493	2.14482	2.15716	2.23932	2.725
	24	Oceania	0	0	4.60141e-13	8.62763e-13	1.61768e-12	3.03315e-12	5.68716e-12	1.06634e-11	1.99939e-11	3.74886e-11	1.73882e-08	3.26293e-08	6.12393e-08	1.14957e-07	2.15845e-07	4.05384e-07	7.61616e-07	1.43145e-06	2.69166e-06	5.06418e-06	9.5343e-06	1.79645e-05	3.38806e-05	6.39698e-05	0.000120942	0.000229012	0.000434452	0.000825971	0.000882026	0.000943878	0.00101246	0.00108891	0.00117456	0.00127104	0.00138026	0.00150452	0.00164657	0.00201912	0.00218943	0.00227543	0.00239034	0.0025496	0.00287436	0.0035121	0.00406022	0.00456329	0.0053577
	25	Greenland	0	0	0	0	0	0	0	0	0	0	0	0	0	0	0	0	0	0	0	0	0	0	0	0	0	0	0	0	0	0	0	0	0	0	0	0	0	0	0	0	0	0	0	0	0	0	0
	26	Antarctica	0	0	0	0	0	0	0	0	0	0	0	0	0	0	0	0	0	0	0	0	0	0	0	0	0	0	0	0	0	0	0	0	0	0	0	0	0	0	0	0	0	0	0	0	0	0	0
		HYDE 3.2	0	0	0.00100413	0.0167023	0.0317464	0.0609359	0.122117	0.25216	0.546831	1.02688	3.27059	3.22242	3.12915	2.70342	3.09869	3.52378	4.11033	4.22718	4.26686	4.73376	4.78757	6.53917	7.18171	6.79374	7.05229	8.26539	9.38256	11.3349	11.7782	12.3229	12.6462	13.2077	14.3209	14.961	15.7274	17.4149	18.1877	18.1251	20.5685	22.0591	25.0586	27.7026	31.5343	35.3874	38.6842	44.6619	55.5801
		Fuller et al (2010), wet rice							0.05	0.2	0.4	0.7	2.3										5
		Fuller et al (2010), total rice							0.1	0.2	0.5	0.8	2.5										5.3
		Barker and Herdt (1985)
		FAO (2015)
	1	North America	0	0	0	0	0	0	0	0	0	0	0	0	0	0	0	0	0	0	0	0	0	0	0	0	0	0	0	3.05107e-09	9.03594e-09	2.39395e-08	5.96141e-08	1.42698e-07	3.32337e-07	7.58556e-07	1.70487e-06	3.78527e-06	8.3216e-06	2.1277e-05	5.51032e-05	0.000142869	0.000373089	0.00097137	0.00256564	0.00687784	0.0168071	0.0436379	0.108924
	2	Europe	0	0	4.89518e-19	1.46855e-18	4.40566e-18	1.3217e-17	3.9651e-17	1.18953e-16	3.56859e-16	1.07058e-15	3.21173e-15	7.13718e-15	1.42744e-14	2.85487e-14	5.70974e-14	1.02775e-13	1.82712e-13	3.65423e-13	7.30847e-13	1.82712e-12	0.024622	0.0370947	0.0468703	0.0664142	0.0454042	0.0543498	0.0734647	0.0766476	0.0810993	0.0839981	0.0869649	0.0900022	0.0931129	0.0962824	0.0995312	0.102862	0.10628	0.109786	0.114406	0.118943	0.126992	0.133818	0.143084	0.15255	0.158507	0.168842	0.298276
	3	USSR	0	0	6.56131e-07	1.14823e-06	2.0094e-06	3.51646e-06	6.15381e-06	1.07692e-05	1.88462e-05	3.29811e-05	5.81696e-05	9.40468e-05	0.000151851	0.000244907	0.000394615	0.000628785	0.00100275	0.00161569	0.00327132	0.00509843	0.00793481	0.00895691	0.0103006	0.0113995	0.0126925	0.0151142	0.0191943	0.024242	0.0257188	0.0270856	0.0284935	0.0299438	0.0314376	0.0329761	0.0345601	0.0361904	0.0378676	0.0395919	0.0413632	0.0432955	0.0453319	0.0486015	0.0510655	0.0544731	0.0572491	0.0619413	0.066833
	4	Pacific Dev.	0	0	7.51935e-05	0.000169185	0.000380667	0.000856501	0.00192713	0.00433604	0.00975608	0.0219512	0.0493902	0.0809071	0.111225	0.171445	0.229055	0.336175	0.437902	0.640586	0.761994	0.860894	0.78137	0.778967	0.772418	0.841676	1.01694	1.26283	1.61473	2.29077	2.45811	2.42745	2.39599	2.36369	2.33048	2.28048	2.22992	2.17875	2.12689	2.07448	2.09362	2.10878	2.11976	2.1262	2.1278	2.14833	2.16123	2.24389	2.73036
	5	China	0	0	0.000670918	0.00530621	0.00847026	0.0154729	0.0319113	0.0717483	0.169849	0.252376	1.62948	1.45055	1.22596	0.63962	0.874565	1.08859	1.46575	1.24757	1.02439	1.23023	1.16332	2.69821	3.1132	2.41294	2.19324	2.78348	3.02428	3.16887	3.33727	3.79923	4.03975	4.51845	5.54817	6.10987	6.79708	8.40426	9.09513	8.94738	10.4032	10.7562	11.7768	12.4189	12.9433	12.7481	10.9522	11.0792	11.4094
	6	Latin America	0	0	0	0	0	0	0	0	0	0	0	0	0	0	0	0	0	0	0	0	0	0	0	0	0	0	0.00418347	0.0183156	0.0197103	0.0211168	0.0225437	0.0240077	0.0255424	0.0272156	0.0291645	0.0317126	0.0353761	0.0413221	0.0520835	0.0565686	0.0621226	0.0670239	0.0732624	0.0843339	0.0971442	0.119592	0.182924
	7	N.Africa_M.East	0	0	2.10712e-07	4.05868e-07	1.05471e-06	3.28487e-06	9.91375e-06	2.24231e-05	0.00547474	0.0109541	0.0327409	0.0353091	0.0379515	0.0357857	0.0337552	0.0302789	0.0270829	0.0323521	0.0389667	0.0478012	0.058574	0.056291	0.0613498	0.0729578	0.0740687	0.0894212	0.137242	0.170543	0.173487	0.174134	0.174754	0.175342	0.175893	0.176403	0.176865	0.177274	0.177623	0.177904	0.182349	0.186717	0.196043	0.205014	0.213677	0.213865	0.224688	0.251361	0.290673
	8	Tropical Africa	0	0	4.73195e-07	9.74469e-07	2.01977e-06	4.21371e-06	8.84834e-06	1.87016e-05	0.000335278	0.000479153	0.000708744	0.000924489	0.00125639	0.00178833	0.00267204	0.00418649	0.006854	0.0116754	0.0206258	0.0351616	0.0596248	0.0813296	0.111216	0.155272	0.224132	0.336599	0.532889	0.858562	0.858562	0.861998	0.865668	0.869596	0.87435	0.878896	0.88385	0.889273	0.895243	0.901855	0.909231	0.91763	0.927174	0.939591	0.953972	0.970821	0.992189	1.01906	1.05374
	9	South Asia	0	0	0.000111639	0.0108936	0.0208013	0.0399322	0.077054	0.149435	0.291264	0.570625	1.12397	1.18475	1.24555	1.30868	1.37186	1.4351	1.49843	1.57338	1.6485	1.73302	1.81789	1.88437	1.95203	1.99985	2.10319	2.18964	2.40384	2.95475	3.01726	3.07994	3.14297	3.20633	3.27005	3.33412	3.39855	3.46335	3.52852	3.59408	4.44045	5.44559	7.14377	8.70035	11.5592	14.9436	19.3613	24.2715	32.9269
	10	SE Asia	0	0	0.000145034	0.000330742	0.00208913	0.00466338	0.0112	0.0265891	0.0701324	0.170466	0.434236	0.469891	0.507057	0.545849	0.586393	0.628827	0.673306	0.720002	0.769115	0.82156	0.874231	0.993945	1.11433	1.23323	1.38262	1.53396	1.57274	1.77216	1.80703	1.84792	1.88903	1.93036	1.97191	2.02477	2.07787	2.13121	2.1848	2.23865	2.33179	2.42526	2.66021	3.06218	3.46627	4.06442	4.66289	5.40278	6.51199
		World	0	0	0.00100413	0.0167023	0.0317464	0.0609359	0.122117	0.25216	0.546831	1.02688	3.27059	3.22242	3.12915	2.70342	3.09869	3.52378	4.11033	4.22718	4.26686	4.73376	4.78757	6.53917	7.18171	6.79374	7.05229	8.26539	9.38256	11.3349	11.7782	12.3229	12.6462	13.2077	14.3209	14.961	15.7274	17.4149	18.1877	18.1251	20.5685	22.0591	25.0586	27.7026	31.5343	35.3874	38.6842	44.6619	55.5801
		1700 estimate (Mha)	HYDE	HOUGHTON	tuning factor	diff
		North America	3.05107e-09			3.05107e-09
		Europe	0.0766476			0.0766476
		USSR	0.024242			0.024242
		Pacific Dev.	2.29077			2.29077
		China	3.16887			3.16887
		Latin America	0.0183156			0.0183156
		N.Africa_M.East	0.170543			0.170543
		Tropical Africa	0.858562			0.858562
		South Asia	2.95475			2.95475
		SE Asia	1.77216			1.77216
		total	11.3349	0		11.3349
						Cereals cultivated in South/Central Asia 8,500 B.C.
						Rice, Millet culitvated in N. China around 7,000 B.C.
						Maize in Central/South America aroun 4,000 B.C.
Best estimate
Total rice area estimate, in M km2			-10000	-9000	-8000	-7000	-6000	-5000	-4000	-3000	-2000	-1000	0	100	200	300	400	500	600	700	800	900	1000	1100	1200	1300	1400	1500	1600	1700	1710	1720	1730	1740	1750	1760	1770	1780	1790	1800	1810	1820	1830	1840	1850	1860	1870	1880	1890
	1	Canada	0	0	0	0	0	0	0	0	0	0	0	0	0	0	0	0	0	0	0	0	0	0	0	0	0	0	0	0	0	0	0	0	0	0	0	0	0	0	0	0	0	0	0	0	0	0	0
	2	USA	0	0	0	0	0	0	0	0	0	0	0	0	0	0	0	0	0	0	0	0	0	0	0	0	0	0	0	3.05107e-11	9.03594e-11	2.39395e-10	5.96141e-10	1.42698e-09	3.32337e-09	7.58556e-09	1.70487e-08	3.78527e-08	8.3216e-08	2.1277e-07	5.51032e-07	1.42869e-06	3.73089e-06	9.7137e-06	2.56564e-05	6.87784e-05	0.000168071	0.000436379	0.00108924
	3	Mexico	0	0	0	0	0	0	0	0	0	0	0	0	0	0	0	0	0	0	0	0	0	0	0	0	0	0	3.8602e-05	0.000154408	0.000167366	0.000180324	0.000193282	0.00020624	0.000219198	0.000232156	0.000245114	0.000258072	0.00027103	0.000283987	0.000296945	0.000309903	0.000322861	0.000335819	0.000348777	0.000361735	0.000374693	0.000387651	0.000457403
	4	Rest Central America	0	0	0	0	0	0	0	0	0	0	0	0	0	0	0	0	0	0	0	0	0	0	0	0	0	0	3.23273e-06	2.8326e-05	2.92404e-05	3.02324e-05	3.13479e-05	3.26757e-05	3.4392e-05	3.68503e-05	4.07679e-05	4.80468e-05	6.11441e-05	8.62382e-05	0.000136171	0.000150051	0.000166748	0.000185504	0.00020688	0.000237532	0.000282255	0.000335656	0.000420452
	5	Brazil	0	0	0	0	0	0	0	0	0	0	0	0	0	0	0	0	0	0	0	0	0	0	0	0	0	0	0	3.81885e-11	8.78627e-11	2.03198e-10	4.72417e-10	1.1042e-09	2.59473e-09	6.12969e-09	1.45561e-08	3.47421e-08	8.33283e-08	2.00799e-07	5.14229e-07	1.26305e-06	3.20791e-06	7.78832e-06	1.83425e-05	4.22658e-05	9.58254e-05	0.000213205	0.000529683
	6	Rest South America	0	0	0	0	0	0	0	0	0	0	0	0	0	0	0	0	0	0	0	0	0	0	0	0	0	0	0	4.22035e-07	4.96215e-07	6.11447e-07	8.06645e-07	1.16044e-06	1.83198e-06	3.14367e-06	5.74906e-06	1.09733e-05	2.15043e-05	4.2794e-05	8.72043e-05	0.000104469	0.000128409	0.000141128	0.000158624	0.000201806	0.000218668	0.000259406	0.000421699
	7	Northern Africa	0	0	1.13617e-10	2.55637e-10	5.75184e-10	1.29416e-09	2.91187e-09	6.55171e-09	5.4215e-05	0.000108434	0.000325276	0.000349711	0.000374173	0.000349899	0.000325694	0.000285341	0.000245166	0.000278449	0.000312191	0.000363026	0.000415103	0.000361828	0.000332943	0.000390756	0.000337008	0.000331653	0.000416178	0.000373378	0.000365584	0.000357791	0.000349997	0.000342204	0.00033441	0.000326617	0.000318823	0.00031103	0.000303236	0.000295443	0.0003283	0.000361156	0.000395749	0.000430341	0.000464933	0.000418089	0.000477052	0.000544142	0.000749071
	8	Western Africa	0	0	3.60891e-09	7.48845e-09	1.56285e-08	3.2806e-08	6.92598e-08	1.47051e-07	3.26892e-06	4.61388e-06	6.70751e-06	8.56164e-06	1.13293e-05	1.56383e-05	2.26045e-05	3.42318e-05	5.41541e-05	8.90171e-05	0.000151073	0.000244335	0.000398569	0.000498874	0.000636654	0.000841806	0.0011676	0.00166955	0.00246221	0.00376657	0.00378892	0.00380698	0.00382661	0.00384798	0.00387699	0.00390393	0.0039337	0.00396675	0.00400363	0.00404503	0.00409182	0.00414618	0.00420867	0.00428124	0.00436646	0.00446778	0.00461477	0.00480484	0.00505652
	9	Eastern Africa	0	0	2.68086e-12	6.00425e-12	1.34542e-11	3.01611e-11	6.76409e-11	1.51749e-10	3.40549e-10	7.64462e-10	1.71649e-09	5.12628e-09	1.53282e-08	4.58742e-08	1.37382e-07	4.11619e-07	1.23371e-06	3.69862e-06	1.10904e-05	2.50316e-05	5.01414e-05	0.000106454	0.000206544	0.000380111	0.000675609	0.00132928	0.00242125	0.00428194	0.00431089	0.00431906	0.00432775	0.00433703	0.00434661	0.00435587	0.00436601	0.00437715	0.00438946	0.00440316	0.00441849	0.00443579	0.00445548	0.00447813	0.00450452	0.00453571	0.00457326	0.00461949	0.00467806
	10	Southern Africa	0	0	1.12036e-09	2.25023e-09	4.5557e-09	9.30093e-09	1.9156e-08	3.98131e-08	8.35207e-08	1.76881e-07	3.7821e-07	6.78125e-07	1.21935e-06	2.19911e-06	3.97857e-06	7.22146e-06	1.31522e-05	2.40381e-05	4.40939e-05	8.22495e-05	0.000147537	0.000207968	0.000268961	0.000330806	0.000398109	0.000367163	0.000445428	0.000537108	0.000485811	0.000493943	0.000502318	0.00051096	0.000519897	0.000529162	0.000538792	0.000548832	0.000559334	0.000570364	0.000581997	0.000594332	0.000607587	0.000636541	0.000668754	0.000704728	0.000733862	0.000766265	0.000802801
	11	Western Europe	0	0	4.89518e-21	1.46855e-20	4.40566e-20	1.3217e-19	3.9651e-19	1.18953e-18	3.56859e-18	1.07058e-17	3.21173e-17	7.13718e-17	1.42744e-16	2.85487e-16	5.70974e-16	1.02775e-15	1.82712e-15	3.65423e-15	7.30847e-15	1.82712e-14	0.00021633	0.00033735	0.000429322	0.000611023	0.000413822	0.000490141	0.000675349	0.000696937	0.000734282	0.000757443	0.000781157	0.000805441	0.000830316	0.000855627	0.000881567	0.000908159	0.000935427	0.000963396	0.00100228	0.00104012	0.00110567	0.00115946	0.00124117	0.00132616	0.00137486	0.00145973	0.00273417
	12	Central Europe	0	0	0	0	0	0	0	0	0	0	0	0	0	0	0	0	0	0	0	0	2.98901e-05	3.35976e-05	3.93808e-05	5.31185e-05	4.02195e-05	5.33577e-05	5.9298e-05	6.95387e-05	7.67111e-05	8.25385e-05	8.84924e-05	9.45811e-05	0.000100813	0.000107198	0.000113745	0.000120464	0.000127368	0.000134468	0.000141777	0.000149309	0.00016425	0.000178724	0.000189668	0.000199341	0.000210207	0.000228691	0.000248588
	13	Turkey	0	0	3.72414e-10	8.37932e-10	1.88535e-09	8.95539e-09	2.26242e-08	4.77228e-08	1.43168e-07	3.22129e-07	6.44258e-07	1.04692e-06	1.69118e-06	2.35557e-06	3.26156e-06	4.48464e-06	6.11542e-06	1.00904e-05	1.65116e-05	2.73474e-05	4.4891e-05	4.92253e-05	8.7073e-05	0.000150462	0.000121206	0.00013061	0.00016718	0.000177629	0.000179704	0.000182309	0.000184951	0.000187631	0.000190351	0.000193109	0.000195908	0.000198747	0.000201628	0.00020455	0.000207514	0.000210522	0.000218477	0.00022601	0.000233804	0.000241866	0.000250206	0.000255692	0.00026091
	14	Ukraine +	0	0	0	0	0	0	0	0	0	0	0	0	0	0	0	0	0	0	0	0	0	0	0	0	0	0	0	0	0	0	0	0	0	0	0	0	0	0	0	0	0	0	0	0	0	0	0
	15	Asia-Stan	0	0	5.77314e-09	1.0103e-08	1.76802e-08	3.09404e-08	5.41458e-08	9.47551e-08	1.65821e-07	2.90187e-07	5.07828e-07	8.16152e-07	1.31167e-06	2.10805e-06	3.38793e-06	5.44489e-06	8.75071e-06	1.40636e-05	2.9273e-05	4.54597e-05	7.0515e-05	7.63194e-05	8.32577e-05	9.33397e-05	0.000106522	0.000124895	0.000159196	0.000205258	0.00021594	0.000224812	0.000234087	0.000243777	0.000253893	0.000264445	0.000275442	0.00028689	0.000298794	0.000311155	0.00032397	0.000337232	0.000350925	0.000365026	0.000379499	0.000394292	0.000409332	0.000431847	0.000453024
	16	Russia +	0	0	7.88164e-10	1.37929e-09	2.41377e-09	4.22413e-09	7.39234e-09	1.29369e-08	2.26405e-08	3.96236e-08	7.38684e-08	1.24316e-07	2.0684e-07	3.41025e-07	5.5822e-07	8.42961e-07	1.27683e-06	2.09326e-06	3.44021e-06	5.52453e-06	8.8331e-06	1.32497e-05	1.97485e-05	2.06549e-05	2.04029e-05	2.62473e-05	3.27461e-05	3.71627e-05	4.12483e-05	4.60444e-05	5.08485e-05	5.56613e-05	6.04834e-05	6.53157e-05	7.0159e-05	7.50142e-05	7.98822e-05	8.47643e-05	8.96615e-05	9.57231e-05	0.000102394	0.000120989	0.000131156	0.000150438	0.000163159	0.000187566	0.000215306
	17	Middle East	0	0	1.62109e-09	2.96511e-09	8.08658e-09	2.25992e-08	7.36015e-08	1.69956e-07	3.89243e-07	7.85327e-07	1.48856e-06	2.3331e-06	3.65004e-06	5.60307e-06	8.59662e-06	1.29634e-05	1.95477e-05	3.49823e-05	6.09645e-05	8.76386e-05	0.000125746	0.000151856	0.000193483	0.000188359	0.000282474	0.00043195	0.000789065	0.00115442	0.00118958	0.00120124	0.00121259	0.00122358	0.00123417	0.0012443	0.00125392	0.00126297	0.00127137	0.00127905	0.00128768	0.00129549	0.00134621	0.00139379	0.00143803	0.0014787	0.00151962	0.00171378	0.00189675
	18	India +	0	0	1.11639e-06	0.000108936	0.000208013	0.000399322	0.00077054	0.00149435	0.00291264	0.00570625	0.0112397	0.0118475	0.0124555	0.0130868	0.0137186	0.014351	0.0149843	0.0157338	0.016485	0.0173302	0.0181789	0.0188437	0.0195203	0.0199985	0.0210319	0.0218964	0.0240384	0.0295475	0.0301726	0.0307994	0.0314297	0.0320633	0.0327005	0.0333412	0.0339855	0.0346335	0.0352852	0.0359408	0.0444045	0.0544559	0.0714377	0.0870035	0.115592	0.149436	0.193613	0.242715	0.329269
	19	Korea	0	0	0	3.63478e-05	4.30339e-05	5.07914e-05	5.9738e-05	6.99835e-05	8.1618e-05	9.46958e-05	0.000109211	0.000144275	0.000190851	0.000252795	0.000335281	0.000445251	0.000592032	0.000788166	0.00105053	0.00117196	0.00129119	0.00153624	0.00203073	0.00150986	0.00174612	0.00197798	0.0024505	0.00303565	0.00333396	0.00355047	0.00378129	0.00402739	0.00428979	0.0045696	0.00486797	0.00518616	0.00552551	0.00588743	0.00627347	0.00668524	0.00676844	0.00678115	0.00679388	0.00685156	0.00690917	0.00693594	0.00697252
	20	China +	0	0	6.70918e-06	1.67144e-05	4.16687e-05	0.000103937	0.000259375	0.000647499	0.00161687	0.00242906	0.0161856	0.0143612	0.0120687	0.00614341	0.00841036	0.0104407	0.0140655	0.0116875	0.00919333	0.0111303	0.010342	0.0254459	0.0291012	0.0226195	0.0201863	0.0258568	0.0277923	0.0286531	0.0300388	0.0344418	0.0366162	0.0411571	0.0511919	0.0565291	0.0631028	0.0788564	0.0854258	0.0835864	0.0977586	0.100876	0.110999	0.117408	0.122639	0.12063	0.102613	0.103856	0.107122
	21	Southeastern Asia	0	0	1.09581e-06	2.6426e-06	1.96446e-05	4.42959e-05	0.000107616	0.000257669	0.000610972	0.00145209	0.00378795	0.00409592	0.00441897	0.00475822	0.00511487	0.00549027	0.00588585	0.00630322	0.00674413	0.00721737	0.00769132	0.00876629	0.00984417	0.0109012	0.011988	0.0130795	0.0131953	0.0148116	0.0151353	0.0155193	0.0159056	0.0162942	0.0166852	0.0170786	0.0174746	0.0178732	0.0182744	0.0186785	0.0194202	0.0201656	0.0223261	0.0261571	0.0300097	0.0347779	0.0395501	0.0457371	0.055618
	22	Indonesia +	0	0	3.54534e-07	6.64825e-07	1.24671e-06	2.33795e-06	4.38449e-06	8.22278e-06	9.03525e-05	0.000252563	0.000554409	0.000602982	0.000651596	0.000700275	0.000749058	0.000798002	0.0008472	0.000896797	0.000947022	0.000998232	0.00105099	0.00117316	0.00129915	0.00143116	0.0018382	0.00226009	0.00253208	0.00291001	0.00293504	0.00295995	0.00298474	0.00300938	0.00303388	0.00316908	0.00330411	0.00343896	0.0035736	0.00370803	0.00389763	0.00408697	0.00427601	0.00446471	0.00465302	0.00586631	0.0070788	0.00829069	0.00950187
	23	Japan	0	0	7.51935e-07	1.69185e-06	3.80667e-06	8.56501e-06	1.92713e-05	4.33604e-05	9.75608e-05	0.000219512	0.000493902	0.00080907	0.00111225	0.00171445	0.00229055	0.00336175	0.00437901	0.00640585	0.00761991	0.00860889	0.0078136	0.00778949	0.00772384	0.00841612	0.0101682	0.012626	0.0161429	0.0228995	0.0245723	0.024265	0.0239498	0.023626	0.0232931	0.0227921	0.0222854	0.0217724	0.0212524	0.0207246	0.0209143	0.021065	0.0211737	0.0212365	0.0212493	0.0214482	0.0215716	0.0223932	0.02725
	24	Oceania	0	0	4.60141e-15	8.62763e-15	1.61768e-14	3.03315e-14	5.68716e-14	1.06634e-13	1.99939e-13	3.74886e-13	1.73882e-10	3.26293e-10	6.12393e-10	1.14957e-09	2.15845e-09	4.05384e-09	7.61616e-09	1.43145e-08	2.69166e-08	5.06418e-08	9.5343e-08	1.79645e-07	3.38806e-07	6.39698e-07	1.20942e-06	2.29012e-06	4.34452e-06	8.25971e-06	8.82026e-06	9.43878e-06	1.01246e-05	1.08891e-05	1.17456e-05	1.27104e-05	1.38026e-05	1.50452e-05	1.64657e-05	2.01912e-05	2.18943e-05	2.27543e-05	2.39034e-05	2.5496e-05	2.87436e-05	3.5121e-05	4.06022e-05	4.56329e-05	5.3577e-05
	25	Greenland	0	0	0	0	0	0	0	0	0	0	0	0	0	0	0	0	0	0	0	0	0	0	0	0	0	0	0	0	0	0	0	0	0	0	0	0	0	0	0	0	0	0	0	0	0	0	0
	26	Antarctica	0	0	0	0	0	0	0	0	0	0	0	0	0	0	0	0	0	0	0	0	0	0	0	0	0	0	0	0	0	0	0	0	0	0	0	0	0	0	0	0	0	0	0	0	0	0	0
		total	0	0	1.00413e-05	0.000167023	0.000317464	0.000609359	0.00122117	0.0025216	0.00546831	0.0102688	0.0327059	0.0322242	0.0312915	0.0270342	0.0309869	0.0352378	0.0411033	0.0422718	0.0426686	0.0473376	0.0478757	0.0653917	0.0718171	0.0679374	0.0705229	0.0826539	0.0938256	0.113349	0.117782	0.123229	0.126462	0.132077	0.143209	0.14961	0.157274	0.174149	0.181877	0.181251	0.205685	0.220591	0.250586	0.277026	0.315343	0.353874	0.386842	0.446619	0.555801
	1	North America	0	0	0	0	0	0	0	0	0	0	0	0	0	0	0	0	0	0	0	0	0	0	0	0	0	0	0	3.05107e-11	9.03594e-11	2.39395e-10	5.96141e-10	1.42698e-09	3.32337e-09	7.58556e-09	1.70487e-08	3.78527e-08	8.3216e-08	2.1277e-07	5.51032e-07	1.42869e-06	3.73089e-06	9.7137e-06	2.56564e-05	6.87784e-05	0.000168071	0.000436379	0.00108924
	2	Europe	0	0	4.89518e-21	1.46855e-20	4.40566e-20	1.3217e-19	3.9651e-19	1.18953e-18	3.56859e-18	1.07058e-17	3.21173e-17	7.13718e-17	1.42744e-16	2.85487e-16	5.70974e-16	1.02775e-15	1.82712e-15	3.65423e-15	7.30847e-15	1.82712e-14	0.00024622	0.000370947	0.000468703	0.000664142	0.000454042	0.000543498	0.000734647	0.000766476	0.000810993	0.000839981	0.000869649	0.000900022	0.000931129	0.000962824	0.000995312	0.00102862	0.0010628	0.00109786	0.00114406	0.00118943	0.00126992	0.00133818	0.00143084	0.0015255	0.00158507	0.00168842	0.00298276
	3	USSR	0	0	6.56131e-09	1.14823e-08	2.0094e-08	3.51646e-08	6.15381e-08	1.07692e-07	1.88462e-07	3.29811e-07	5.81696e-07	9.40468e-07	1.51851e-06	2.44907e-06	3.94615e-06	6.28785e-06	1.00275e-05	1.61569e-05	3.27132e-05	5.09843e-05	7.93481e-05	8.95691e-05	0.000103006	0.000113995	0.000126925	0.000151142	0.000191943	0.00024242	0.000257188	0.000270856	0.000284935	0.000299438	0.000314376	0.000329761	0.000345601	0.000361904	0.000378676	0.000395919	0.000413632	0.000432955	0.000453319	0.000486015	0.000510655	0.000544731	0.000572491	0.000619413	0.00066833
	4	Pacific Dev.	0	0	7.51935e-07	1.69185e-06	3.80667e-06	8.56501e-06	1.92713e-05	4.33604e-05	9.75608e-05	0.000219512	0.000493902	0.000809071	0.00111225	0.00171445	0.00229055	0.00336175	0.00437902	0.00640586	0.00761994	0.00860894	0.0078137	0.00778967	0.00772418	0.00841676	0.0101694	0.0126283	0.0161473	0.0229077	0.0245811	0.0242745	0.0239599	0.0236369	0.0233048	0.0228048	0.0222992	0.0217875	0.0212689	0.0207448	0.0209362	0.0210878	0.0211976	0.021262	0.021278	0.0214833	0.0216123	0.0224389	0.0273036
	5	China	0	0	6.70918e-06	5.30621e-05	8.47026e-05	0.000154729	0.000319113	0.000717483	0.00169849	0.00252376	0.0162948	0.0145055	0.0122596	0.0063962	0.00874565	0.0108859	0.0146575	0.0124757	0.0102439	0.0123023	0.0116332	0.0269821	0.031132	0.0241294	0.0219324	0.0278348	0.0302428	0.0316887	0.0333727	0.0379923	0.0403975	0.0451845	0.0554817	0.0610987	0.0679708	0.0840426	0.0909513	0.0894738	0.104032	0.107562	0.117768	0.124189	0.129433	0.127481	0.109522	0.110792	0.114094
	6	Latin America	0	0	0	0	0	0	0	0	0	0	0	0	0	0	0	0	0	0	0	0	0	0	0	0	0	0	4.18347e-05	0.000183156	0.000197103	0.000211168	0.000225437	0.000240077	0.000255424	0.000272156	0.000291645	0.000317126	0.000353761	0.000413221	0.000520835	0.000565686	0.000621226	0.000670239	0.000732624	0.000843339	0.000971442	0.00119592	0.00182924
	7	N.Africa_M.East	0	0	2.10712e-09	4.05868e-09	1.05471e-08	3.28487e-08	9.91375e-08	2.24231e-07	5.47474e-05	0.000109541	0.000327409	0.000353091	0.000379515	0.000357857	0.000337552	0.000302789	0.000270829	0.000323521	0.000389667	0.000478012	0.00058574	0.00056291	0.000613498	0.000729578	0.000740687	0.000894212	0.00137242	0.00170543	0.00173487	0.00174134	0.00174754	0.00175342	0.00175893	0.00176403	0.00176865	0.00177274	0.00177623	0.00177904	0.00182349	0.00186717	0.00196043	0.00205014	0.00213677	0.00213865	0.00224688	0.00251361	0.00290673
	8	Tropical Africa	0	0	4.73195e-09	9.74469e-09	2.01977e-08	4.21371e-08	8.84834e-08	1.87016e-07	3.35278e-06	4.79153e-06	7.08744e-06	9.24489e-06	1.25639e-05	1.78833e-05	2.67204e-05	4.18649e-05	6.854e-05	0.000116754	0.000206258	0.000351616	0.000596248	0.000813296	0.00111216	0.00155272	0.00224132	0.00336599	0.00532889	0.00858562	0.00858562	0.00861998	0.00865668	0.00869596	0.0087435	0.00878896	0.0088385	0.00889273	0.00895243	0.00901855	0.00909231	0.0091763	0.00927174	0.00939591	0.00953972	0.00970821	0.00992189	0.0101906	0.0105374
	9	South Asia	0	0	1.11639e-06	0.000108936	0.000208013	0.000399322	0.00077054	0.00149435	0.00291264	0.00570625	0.0112397	0.0118475	0.0124555	0.0130868	0.0137186	0.014351	0.0149843	0.0157338	0.016485	0.0173302	0.0181789	0.0188437	0.0195203	0.0199985	0.0210319	0.0218964	0.0240384	0.0295475	0.0301726	0.0307994	0.0314297	0.0320633	0.0327005	0.0333412	0.0339855	0.0346335	0.0352852	0.0359408	0.0444045	0.0544559	0.0714377	0.0870035	0.115592	0.149436	0.193613	0.242715	0.329269
	10	SE Asia	0	0	1.45034e-06	3.30742e-06	2.08913e-05	4.66338e-05	0.000112	0.000265891	0.000701324	0.00170466	0.00434236	0.00469891	0.00507057	0.00545849	0.00586393	0.00628827	0.00673306	0.00720002	0.00769115	0.0082156	0.00874231	0.00993945	0.0111433	0.0123323	0.0138262	0.0153396	0.0157274	0.0177216	0.0180703	0.0184792	0.0188903	0.0193036	0.0197191	0.0202477	0.0207787	0.0213121	0.021848	0.0223865	0.0233179	0.0242526	0.0266021	0.0306218	0.0346627	0.0406442	0.0466289	0.0540278	0.0651199
		total	0	0	1.00413e-05	0.000167023	0.000317464	0.000609359	0.00122117	0.0025216	0.00546831	0.0102688	0.0327059	0.0322242	0.0312915	0.0270342	0.0309869	0.0352378	0.0411033	0.0422718	0.0426686	0.0473376	0.0478757	0.0653917	0.0718171	0.0679374	0.0705229	0.0826539	0.0938256	0.113349	0.117782	0.123229	0.126462	0.132077	0.143209	0.14961	0.157274	0.174149	0.181877	0.181251	0.205685	0.220591	0.250586	0.277026	0.315343	0.353874	0.386842	0.446619	0.555801
						7000 BC:	see maps in BC ordner, Greece, Levant, East China						0.000225558	0.000222236	0.000215804	0.000186443	0.000213703	0.00024302	0.000283471	0.000291529	0.000294266	0.000326466	0.000330177	0.000450977	0.000495291	0.000468534	0.000486365	0.000570027	0.000647073	0.000781715	0.000812293	0.000849853	0.000872149	0.000910877	0.000987651	0.00103179	0.00108465	0.00120103	0.00125433	0.00125001	0.00141852	0.00152132	0.00172818	0.00191053	0.00217478	0.00244051	0.00266788	0.00308013	0.00383311
									4000 BC: see maps of Olofsson and Hickler (2007); Mexico, Peru, W.europe, C.Europe, Levant,C.Asia, Northern part of Western Africa, (Indo)china, indonesia
											2000 BC: central america, Northern part Latin America, California, texas, louisiana, caribbean
													0 AD	Southern part of Latin America, Southern Africa still no agric !
Voor GEB paper table			-10000	-9000	-8000	-7000	-6000	-5000	-4000	-3000	-2000	-1000	0	100	200	300	400	500	600	700	800	900	1000	1100	1200	1300	1400	1500	1600	1700	1710	1720	1730	1740	1750	1760	1770	1780	1790	1800	1810	1820	1830	1840	1850	1860	1870	1880	1890
		Americas	0	0	0	0	0	0	0	0	0	0	0	0	0	0	0	0	0	0	0	0	0	0	0	0	0	0	4.18347e-05	0.000183156	0.000197103	0.000211168	0.000225437	0.000240078	0.000255428	0.000272163	0.000291662	0.000317164	0.000353844	0.000413433	0.000521386	0.000567115	0.000624957	0.000679953	0.00075828	0.000912117	0.00113951	0.0016323	0.00291848
		Europe incl. Turkey	0	0	3.72414e-10	8.37932e-10	1.88535e-09	8.95539e-09	2.26242e-08	4.77228e-08	1.43168e-07	3.22129e-07	6.44258e-07	1.04692e-06	1.69118e-06	2.35557e-06	3.26156e-06	4.48464e-06	6.11542e-06	1.00904e-05	1.65116e-05	2.73474e-05	0.000291111	0.000420173	0.000555776	0.000814604	0.000575248	0.000674108	0.000901828	0.000944105	0.000990698	0.00102229	0.0010546	0.00108765	0.00112148	0.00115593	0.00119122	0.00122737	0.00126442	0.00130241	0.00135157	0.00139995	0.0014884	0.00156419	0.00166464	0.00176737	0.00183528	0.00194411	0.00324367
		former USSR	0	0	6.56131e-09	1.14823e-08	2.0094e-08	3.51646e-08	6.15381e-08	1.07692e-07	1.88462e-07	3.29811e-07	5.81696e-07	9.40468e-07	1.51851e-06	2.44907e-06	3.94615e-06	6.28785e-06	1.00275e-05	1.61569e-05	3.27132e-05	5.09843e-05	7.93481e-05	8.95691e-05	0.000103006	0.000113995	0.000126925	0.000151142	0.000191943	0.00024242	0.000257188	0.000270856	0.000284935	0.000299438	0.000314376	0.000329761	0.000345601	0.000361904	0.000378676	0.000395919	0.000413632	0.000432955	0.000453319	0.000486015	0.000510655	0.000544731	0.000572491	0.000619413	0.00066833
		Asia+Pacific	0	0	1.00295e-05	0.000167	0.000317421	0.000609272	0.001221	0.00252125	0.00541041	0.010155	0.0323723	0.0318633	0.0309016	0.0266616	0.0306273	0.0348999	0.0407735	0.0418503	0.0421009	0.0465446	0.0464939	0.0637068	0.0697133	0.0650653	0.0672424	0.078131	0.0869449	0.10302	0.107386	0.112747	0.11589	0.121412	0.13244	0.138737	0.146288	0.163039	0.170625	0.169825	0.193978	0.208653	0.238351	0.26447	0.302404	0.340524	0.372896	0.431688	0.537684
		Africa	0	0	4.84557e-09	1.00003e-08	2.07728e-08	4.34312e-08	9.13953e-08	1.93568e-07	5.75678e-05	0.000113225	0.000332364	0.000358956	0.000386737	0.000367782	0.000352414	0.000327205	0.000313706	0.000395203	0.000518449	0.000714642	0.00101135	0.00117512	0.0014451	0.00194348	0.00257833	0.00369765	0.00574507	0.008959	0.00895121	0.00897777	0.00900668	0.00903817	0.00907791	0.00911558	0.00915732	0.00920376	0.00925566	0.009314	0.00942061	0.00953746	0.00966748	0.00982625	0.0100047	0.0101263	0.0103989	0.0107347	0.0112865
		total	0	0	1.00413e-05	0.000167023	0.000317464	0.000609359	0.00122117	0.0025216	0.00546831	0.0102688	0.0327059	0.0322242	0.0312915	0.0270342	0.0309869	0.0352378	0.0411033	0.0422718	0.0426686	0.0473376	0.0478757	0.0653917	0.0718171	0.0679374	0.0705229	0.0826539	0.0938256	0.113349	0.117782	0.123229	0.126462	0.132077	0.143209	0.14961	0.157274	0.174149	0.181877	0.181251	0.205685	0.220591	0.250586	0.277026	0.315343	0.353874	0.386842	0.446619	0.555801
Best estimate
Rice area per capita (ha/cap)			-10000	-9000	-8000	-7000	-6000	-5000	-4000	-3000	-2000	-1000	0	100	200	300	400	500	600	700	800	900	1000	1100	1200	1300	1400	1500	1600	1700	1710	1720	1730	1740	1750	1760	1770	1780	1790	1800	1810	1820	1830	1840	1850	1860	1870	1880	1890
	1	Canada	0	0	0	0	0	0	0	0	0	0	0	0	0	0	0	0	0	0	0	0	0	0	0	0	0	0	0	0	0	0	0	0	0	0	0	0	0	0	0	0	0	0	0	0	0	0	0
	2	USA	0	0	0	0	0	0	0	0	0	0	0	0	0	0	0	0	0	0	0	0	0	0	0	0	0	0	0	1.52554e-08	3.9756e-08	9.05805e-08	1.9342e-07	3.9592e-07	7.86461e-07	1.52737e-06	2.91432e-06	5.48196e-06	1.01911e-05	2.19968e-05	4.80164e-05	0.000103895	0.000225909	0.00048866	0.00107	0.00202429	0.00431789	0.00961874	0.0213603
	3	Mexico	0	0	0	0	0	0	0	0	0	0	0	0	0	0	0	0	0	0	0	0	0	0	0	0	0	0	0.0049528	0.0166233	0.0121745	0.0099046	0.00852777	0.00760358	0.00694032	0.00644115	0.00605187	0.00573979	0.00548401	0.00449527	0.00363029	0.00292285	0.00233232	0.00186365	0.00146572	0.0011342	0.000961549	0.000766317	0.000724509
	4	Rest Central America	0	0	0	0	0	0	0	0	0	0	0	0	0	0	0	0	0	0	0	0	0	0	0	0	0	0	0.000323273	0.00070815	0.000674412	0.000647186	0.000626075	0.000611592	0.000605663	0.000612733	0.000642038	0.000718677	0.000870858	0.00117222	0.00177018	0.00186905	0.00199368	0.00213234	0.0022897	0.00253478	0.00290787	0.00334243	0.00354836
	5	Brazil	0	0	0	0	0	0	0	0	0	0	0	0	0	0	0	0	0	0	0	0	0	0	0	0	0	0	0	2.29378e-09	5.05684e-09	1.115e-08	2.45807e-08	5.41585e-08	1.19207e-07	2.61983e-07	5.74553e-07	1.25047e-06	2.71829e-06	5.8984e-06	1.34602e-05	2.98451e-05	6.56198e-05	0.000141937	0.000295656	0.000618461	0.0012618	0.00252155	0.00561776
	6	Rest South America	0	0	0	0	0	0	0	0	0	0	0	0	0	0	0	0	0	0	0	0	0	0	0	0	0	0	0	7.65588e-05	7.82483e-05	8.33832e-05	9.46295e-05	0.000116486	0.000156515	0.000227383	0.000350219	0.000560146	0.000915338	0.00151182	0.00240597	0.00234695	0.00227165	0.00205669	0.00196309	0.00216773	0.00207202	0.00220953	0.00289158
	7	Northern Africa	0	0	1.22102e-08	2.34293e-08	4.48276e-08	8.55315e-08	1.62758e-07	3.08907e-07	0.00215063	0.00355474	0.00871695	0.00880295	0.00884724	0.0077711	0.00679393	0.00558972	0.0045094	0.00480758	0.00505804	0.00532121	0.00555357	0.00441143	0.00372842	0.00404387	0.0032416	0.00297977	0.00757465	0.006977	0.00671172	0.0064539	0.00620329	0.00595967	0.00572282	0.00549254	0.00526862	0.00505088	0.00483913	0.0046332	0.00504848	0.00517288	0.00480157	0.00456749	0.00424103	0.00324319	0.00332656	0.00324782	0.0036031
	8	Western Africa	0	0	2.73726e-06	3.64667e-06	4.8714e-06	6.52568e-06	7.78203e-06	7.28084e-06	0.000104427	0.000100009	8.17974e-05	9.8653e-05	0.000123649	0.000177665	0.000267574	0.000429495	0.000722109	0.00111468	0.00175056	0.00255446	0.00379588	0.00525127	0.00715333	0.00868277	0.0137039	0.0201143	0.0223827	0.0404977	0.0406411	0.0405226	0.0404194	0.0403326	0.0403228	0.0402876	0.0402772	0.040295	0.0403451	0.0404328	0.0386489	0.0369854	0.0334244	0.0306323	0.0284185	0.0283547	0.0264358	0.0249413	0.0221699
	9	Eastern Africa	0	0	1.42174e-09	2.28447e-09	3.65427e-09	5.81807e-09	9.21799e-09	1.4531e-08	2.27869e-08	3.55421e-08	5.51326e-08	1.39611e-07	3.52012e-07	8.83202e-07	2.20405e-06	5.4687e-06	1.34875e-05	3.30597e-05	8.05286e-05	0.000158514	0.000280138	0.00053636	0.000942613	0.00153833	0.00242367	0.00426808	0.00667623	0.0101148	0.0101415	0.0101358	0.0101235	0.0101048	0.010079	0.0100444	0.0100038	0.00995711	0.00990432	0.0098454	0.00978025	0.00970417	0.00962213	0.00953381	0.00943877	0.00933657	0.00920827	0.00907149	0.00892506
	10	Southern Africa	0	0	9.71752e-07	1.36879e-06	1.91419e-06	2.65937e-06	3.67354e-06	5.05059e-06	6.91888e-06	9.4551e-06	1.2904e-05	2.13286e-05	3.51209e-05	5.75826e-05	9.39451e-05	0.000152413	0.000245691	0.000393144	0.000623639	0.00107527	0.00179308	0.00233317	0.00280189	0.00316349	0.00351833	0.00299538	0.00332245	0.00368973	0.00328904	0.00330366	0.00331794	0.00333185	0.00334533	0.00335833	0.00337079	0.00338262	0.00339305	0.00340296	0.00341238	0.00342111	0.00321467	0.0031122	0.00303469	0.00296047	0.00288015	0.00281362	0.00276497
	11	Western Europe	0	0	1.79013e-17	3.91194e-17	8.43469e-17	1.79108e-16	3.7379e-16	7.64918e-16	1.53128e-15	2.99201e-15	5.69539e-15	1.08864e-14	1.86514e-14	3.18183e-14	5.40365e-14	8.22049e-14	1.2291e-13	2.05698e-13	3.42457e-13	7.04723e-13	0.0070871	0.0084986	0.00878319	0.0105201	0.00607329	0.00746429	0.00898657	0.00806418	0.00971733	0.00987533	0.0100296	0.0101797	0.010325	0.0104626	0.0105939	0.0107179	0.0108336	0.0109397	0.0111478	0.0113182	0.0117536	0.0117922	0.0118915	0.0118788	0.0115094	0.010669	0.018405
	12	Central Europe	0	0	0	0	0	0	0	0	0	0	0	0	0	0	0	0	0	0	0	0	0.000116509	0.000107781	9.31161e-05	8.62106e-05	9.8802e-05	9.981e-05	8.44633e-05	8.73223e-05	9.04113e-05	9.33983e-05	9.6134e-05	9.88229e-05	0.000101456	0.000104008	0.00010653	0.000108622	0.000110332	0.000112375	0.000113326	0.000111176	0.000112474	0.000113156	0.000113813	0.000113051	0.000112636	0.00011368	0.00011549
	13	Turkey	0	0	7.63759e-07	1.01849e-06	1.07377e-06	3.11049e-06	4.71456e-06	5.87435e-06	8.85677e-06	1.14805e-05	1.26999e-05	1.97656e-05	3.05972e-05	4.29553e-05	5.99403e-05	8.6243e-05	0.000123299	0.000190533	0.000293107	0.00043454	0.000645465	0.00062603	0.000779377	0.00115006	0.00106127	0.00093163	0.000961297	0.000926826	0.000880493	0.000849415	0.000819743	0.000791335	0.000764067	0.000737771	0.000712414	0.000687904	0.000664161	0.00064111	0.000618501	0.000595506	0.000566756	0.000539586	0.000517334	0.00048674	0.000460579	0.000422101	0.000389908
	14	Ukraine region	0	0	0	0	0	0	0	0	0	0	0	0	0	0	0	0	0	0	0	0	0	0	0	0	0	0	0	0	0	0	0	0	0	0	0	0	0	0	0	0	0	0	0	0	0	0	0
	15	Asia-Stan	0	0	3.24869e-06	4.87303e-06	7.30955e-06	1.09643e-05	1.64465e-05	2.46697e-05	3.70046e-05	5.55069e-05	8.32603e-05	0.000123915	0.000184751	0.000275883	0.000412528	0.000626112	0.000949651	0.00142201	0.0027603	0.00400086	0.00581807	0.00419799	0.00305309	0.0034228	0.00390619	0.00343496	0.00350267	0.00338709	0.00327579	0.00321194	0.00314948	0.00308827	0.00302818	0.00296908	0.00291082	0.00285329	0.00279634	0.00273985	0.00268367	0.00260016	0.00251388	0.00240536	0.0023641	0.00218267	0.00203489	0.00186147	0.00169262
	16	Russia region	0	0	2.04253e-07	3.06381e-07	4.59573e-07	6.89366e-07	1.03406e-06	1.55113e-06	2.32679e-06	3.49043e-06	5.57746e-06	8.76074e-06	1.36046e-05	2.09351e-05	3.19839e-05	4.50785e-05	6.37284e-05	9.75123e-05	0.000149575	0.000232123	0.000359069	0.000511175	0.000722329	0.00069639	0.000633631	0.000749923	0.000818653	0.000827676	0.000886476	0.000959147	0.00102576	0.00108642	0.00114126	0.00119042	0.00123408	0.00127241	0.00130563	0.00133393	0.00135755	0.00139341	0.00143202	0.00162456	0.00168972	0.00185842	0.00193149	0.00202769	0.00215371
	17	Middle East	0	0	3.7898e-07	5.94157e-07	1.38892e-06	3.32702e-06	9.28746e-06	1.8382e-05	3.6084e-05	6.23984e-05	0.000101368	0.000142394	0.000201642	0.000282422	0.00039788	0.000591812	0.00087754	0.00144034	0.00229708	0.00308913	0.00416377	0.00335224	0.00290079	0.00264587	0.0041129	0.0049024	0.00720607	0.0092615	0.0088859	0.00805988	0.00738122	0.00681278	0.00632884	0.005911	0.00554575	0.00522293	0.00493476	0.00467515	0.00444532	0.00418744	0.00406671	0.00358416	0.00341297	0.00307089	0.00291121	0.00286599	0.00277221
	18	India region	0	0	0.000359798	0.0251784	0.0281164	0.0327407	0.0367598	0.0477292	0.0634455	0.0884225	0.11265	0.103909	0.0943506	0.0846418	0.092255	0.0983762	0.102499	0.110067	0.116896	0.118629	0.139975	0.146032	0.149631	0.174847	0.19435	0.190638	0.17676	0.231692	0.232148	0.23375	0.235261	0.236678	0.238002	0.239232	0.240366	0.241403	0.242342	0.24318	0.295139	0.355317	0.446684	0.522314	0.666865	0.829157	1.02937	1.16379	1.43955
	19	Korea	0	0	0	0.00320676	0.00219342	0.00145041	0.000904112	0.000567608	0.000352944	0.000216264	0.000129314	0.000162106	0.000204014	0.000258118	0.000327646	0.000417194	0.000532773	0.000680035	0.000870493	0.000931308	0.000985656	0.00113278	0.0014481	0.00105359	0.00117005	0.00128133	0.00148688	0.0015103	0.0016235	0.00169289	0.00176601	0.00184308	0.00192428	0.00200985	0.00210002	0.00219505	0.00229518	0.00240072	0.00251194	0.00266825	0.00257322	0.00259995	0.00240287	0.00231045	0.00222441	0.00221059	0.00205343
	20	China region	0	0	0.0199158	0.0396924	0.0791622	0.157968	0.315366	0.629821	1.25818	1.51215	8.06078	5.38991	3.40907	1.3044	1.34058	1.24777	1.25877	0.782284	0.459666	0.49468	0.413682	0.848197	0.727531	0.753985	0.576752	0.646421	0.555845	0.458449	0.437252	0.470892	0.47018	0.496318	0.579709	0.601096	0.630017	0.739167	0.751738	0.690485	0.758029	0.73418	0.796933	0.840453	0.875308	0.853265	0.719384	0.724657	0.74261
	21	Southeastern Asia	0	0	0.000169987	0.000248768	0.00111979	0.00152619	0.0022379	0.0032302	0.00461288	0.0108465	0.00648934	0.00790264	0.0101377	0.0213008	0.0167568	0.0145439	0.0116213	0.0149454	0.0202505	0.0179621	0.0205817	0.00959207	0.0094192	0.0134597	0.0166392	0.0142056	0.0133465	0.0146588	0.0143063	0.0127933	0.0123367	0.0112436	0.00925177	0.00857614	0.00786064	0.00643058	0.0060698	0.00634359	0.00563791	0.00567477	0.00570882	0.00632324	0.00694535	0.00818438	0.0109506	0.0125128	0.0147498
	22	Indonesia region	0	0	0.000245465	0.00036582	0.00053993	0.000788941	0.00103083	0.00140463	0.0114452	0.0166148	0.0211977	0.0211823	0.021117	0.0210048	0.0208465	0.0206404	0.0203823	0.0200649	0.0196783	0.0195738	0.0195043	0.0178022	0.016667	0.0170355	0.0190278	0.0206908	0.0196796	0.0194435	0.0189168	0.0183938	0.017905	0.017447	0.0170167	0.0172135	0.017396	0.0175652	0.017722	0.0178671	0.0178151	0.0177558	0.0171497	0.0165154	0.0159129	0.0179186	0.0195373	0.0201121	0.0205464
	23	Japan	0	0	0.00133802	0.00222308	0.00366321	0.00598641	0.00970301	0.0156019	0.00975404	0.012423	0.0189928	0.0288535	0.0369638	0.05332	0.066911	0.0925408	0.113924	0.157912	0.178402	0.191834	0.16603	0.150715	0.137125	0.137984	0.135094	0.140969	0.165331	0.211558	0.224844	0.21993	0.215037	0.210158	0.205289	0.192322	0.180368	0.169303	0.159021	0.14943	0.143507	0.137875	0.132477	0.12726	0.122177	0.0984005	0.0823356	0.0731746	0.0778454
	24	Oceania	0	0	3.93097e-11	4.91371e-11	6.14213e-11	7.67767e-11	9.59708e-11	1.19964e-10	1.49954e-10	1.87443e-10	5.79608e-08	6.52586e-08	8.74846e-08	1.04506e-07	1.43896e-07	1.80171e-07	2.53872e-07	3.181e-07	4.89393e-07	7.91278e-07	1.58905e-06	2.89749e-06	5.29384e-06	8.76299e-06	1.30045e-05	1.86189e-05	2.5556e-05	3.09352e-05	3.04147e-05	3.25475e-05	3.49126e-05	3.75487e-05	4.05022e-05	4.41332e-05	4.82607e-05	5.29761e-05	5.8389e-05	7.21114e-05	7.6022e-05	7.68726e-05	7.86296e-05	8.17178e-05	8.98237e-05	0.000105871	0.000118212	0.000123979	0.000133685
	25	Greenland	0	0	0	0	0	0	0	0	0	0	0	0	0	0	0	0	0	0	0	0	0	0	0	0	0	0	0	0	0	0	0	0	0	0	0	0	0	0	0	0	0	0	0	0	0	0	0
	26	Antarctica	0	0	0	0	0	0	0	0	0	0	0	0	0	0	0	0	0	0	0	0	0	0	0	0	0	0	0	0	0	0	0	0	0	0	0	0	0	0	0	0	0	0	0	0	0	0	0
		total	0	0	0.000138802	0.00174631	0.00240852	0.00319968	0.00425058	0.00567589	0.00754108	0.00930514	0.0140893	0.0136016	0.0130044	0.0118799	0.0128282	0.0139141	0.0151396	0.0151945	0.0149329	0.0152214	0.0148021	0.0164317	0.0161459	0.0148839	0.0159354	0.0164194	0.0181852	0.0191463	0.0191984	0.0191633	0.0190145	0.0189846	0.0191958	0.0191735	0.0191972	0.0195346	0.0195138	0.0192018	0.0202213	0.0209424	0.0220717	0.023184	0.0248075	0.0266411	0.0291378	0.0317676	0.0364818
		min	0	0	0	0	0	0	0	0	0	0	0	0	0	0	0	0	0	0	0	0	0	0	0	0	0	0	0	0	0	0	0	0	0	0	0	0	0	0	0	0	0	0	0	0	0	0	0
		max	0	0	0.0199158	0.0396924	0.0791622	0.157968	0.315366	0.629821	1.25818	1.51215	8.06078	5.38991	3.40907	1.3044	1.34058	1.24777	1.25877	0.782284	0.459666	0.49468	0.413682	0.848197	0.727531	0.753985	0.576752	0.646421	0.555845	0.458449	0.437252	0.470892	0.47018	0.496318	0.579709	0.601096	0.630017	0.739167	0.751738	0.690485	0.758029	0.73418	0.796933	0.840453	0.875308	0.853265	1.02937	1.16379	1.43955
			-10000	-9000	-8000	-7000	-6000	-5000	-4000	-3000	-2000	-1000	0	100	200	300	400	500	600	700	800	900	1000	1100	1200	1300	1400	1500	1600	1700	1710	1720	1730	1740	1750	1760	1770	1780	1790	1800	1810	1820	1830	1840	1850	1860	1870	1880	1890
		Canada	0	0	0	0	0	0	0	0	0	0	0	0	0	0	0	0	0	0	0	0	0	0	0	0	0	0	0	0	0	0	0	0	0	0	0	0	0	0	0	0	0	0	0	0	0	0	0
		China	0	0	0.659199	1.648	4.11999	10.3	25.75	64.3749	160.937	241.406	1615.56	1432.96	1203.56	610.868	837.406	1040.28	1402.6	1164.65	915.072	1108.61	1029.63	2538.91	2903.28	2253.88	2009.26	2574.96	2768.18	2808.52	2939.1	3375.8	3589.45	4039.53	5038.78	5568.04	6220.7	7791.09	8442.78	8253.3	9664.67	9970.29	10979	11615.3	12133.8	11928.2	10121.9	10241.2	10562.8
		Germany	0	0	0	0	0	0	0	0	0	0	0	0	0	0	0	0	0	0	0	0	0	0	0	0	0	0	0	0	0	0	0	0	0	0	0	0	0	0	0	0	0	0	0	0	0	0	0
		India	0	0	0	8.29204	16.3426	32.2091	63.4801	125.111	246.579	485.975	957.796	1005.69	1053.58	1101.47	1149.36	1197.25	1245.14	1293.03	1340.91	1388.8	1436.69	1484.58	1532.47	1580.36	1628.25	1676.14	1724.03	2107.15	2153.98	2200.8	2247.63	2294.45	2341.28	2388.11	2434.93	2481.76	2528.58	2575.41	3277.79	4090.59	5387.6	6609.79	9041.7	11886.7	15589.1	19577.8	26606
		Indonesia	0	0	0.035434	0.0664388	0.124573	0.233574	0.437951	0.821158	9.03273	25.2506	55.4281	60.2781	65.1281	69.978	74.828	79.678	84.5279	89.3779	94.2278	99.0778	103.928	115.475	127.023	138.57	176.677	214.784	235.57	263.284	266.055	268.827	271.598	274.369	277.141	290.998	304.855	318.712	332.569	346.426	365.826	385.226	404.625	424.025	443.425	565.367	687.309	809.251	931.193
		Japan	0	0	0.0751935	0.169185	0.380667	0.856501	1.92713	4.33604	9.75608	21.9512	49.3902	80.907	111.225	171.445	229.055	336.175	437.901	640.585	761.991	860.889	781.36	778.949	772.384	841.612	1016.82	1262.6	1614.29	2289.95	2457.23	2426.5	2394.98	2362.6	2329.31	2279.21	2228.54	2177.24	2125.24	2072.46	2091.43	2106.5	2117.37	2123.65	2124.93	2144.82	2157.16	2239.32	2725
		UK	0	0	0	0	0	0	0	0	0	0	0	0	0	0	0	0	0	0	0	0	0	0	0	0	0	0	0	0	0	0	0	0	0	0	0	0	0	0	0	0	0	0	0	0	0	0	0
		USA	0	0	0	0	0	0	0	0	0	0	0	0	0	0	0	0	0	0	0	0	0	0	0	0	0	0	0	3.05107e-06	9.03594e-06	2.39395e-05	5.96141e-05	0.000142698	0.000332337	0.000758556	0.00170487	0.00378527	0.0083216	0.021277	0.0551032	0.142869	0.373089	0.97137	2.56564	6.87784	16.8071	43.6379	108.924
		Egypt	0	0	0	0	0	0	0	0	5.42002	10.84	32.5201	34.9592	37.3982	34.9592	32.5201	28.4551	24.3901	27.6421	30.8941	35.7722	40.6502	35.3657	32.5201	38.2112	32.9266	32.5201	40.6502	36.5852	35.7722	34.9592	34.1462	33.3332	32.5201	31.7071	30.8941	30.0811	29.2681	28.4551	31.7071	34.9592	38.2112	41.4632	44.7152	39.8235	45.5126	52.0144	72.3
[truncated: 207 more columns]

## Sheet: lower
ISO1	y-10000	y-9000	y-8000	y-7000	y-6000	y-5000	y-4000	y-3000	y-2000	y-1000	y0	y100	y200	y300	y400	y500	y600	y700	y800	y900	y1000	y1100	y1200	y1300	y1400	y1500	y1600	y1700	y1710	y1720	y1730	y1740	y1750	y1760	y1770	y1780	y1790	y1800	y1810	y1820	y1830	y1840	y1850	y1860	y1870	y1880	y1890	y1900	y1910
4	0	0	1.50219e-06	4.67988e-06	1.29597e-05	3.36453e-05	0.000247293	0.000759543	0.00186227	0.00408791	0.0136264	0.0256997	0.0473416	0.0777754	0.126808	0.205429	0.330968	0.51477	0.796549	1.24028	1.92397	3.21094	5.32991	5.8694	9.87171	16.4967	32.2476	50.3457	51.963	53.5166	55.101	56.7164	58.3627	60.0397	61.7474	63.4855	65.2537	67.0516	68.8788	70.7347	73.3606	77.7081	82.2876	87.1091	92.183	98.9709	107.419	116.547	125.615
8	0	0	0	0	0	0	0	0	0	0	0	0	0	0	0	0	0	0	0	0	0.200476	0.211312	0.222149	0.232985	0.243822	0.254659	0.265495	0.414497	0.436008	0.45794	0.480292	0.503065	0.526258	0.549872	0.573907	0.598362	0.623238	0.648535	0.674252	0.70039	0.720583	0.772939	0.828995	0.924541	1.02198	1.13846	1.2572	1.40008	1.53603
12	0	0	0	0	0	0	0	0	0	0	0	0	0	0	0	0	0	0	0	0	0	0	0	0	0	0	0	0	0	0	0	0	0	0	0	0	0	0	0	0	0	0	0	0	0	0	0	0	0
16	0	0	0	0	0	0	0	0	0	0	0	0	0	0	0	0	0	0	0	0	0	0	0	0	0	0	0	0	0	0	0	0	0	0	0	0	0	0	0	0	0	0	0	0	0	0	0	0	0
20	0	0	0	0	0	0	0	0	0	0	0	0	0	0	0	0	0	0	0	0	0	0	0	0	0	0	0	0	0	0	0	0	0	0	0	0	0	0	0	0	0	0	0	0	0	0	0	0	0
24	0	0	1.78076e-07	6.67786e-07	2.22595e-06	6.9561e-06	2.08683e-05	6.08659e-05	0.000173903	0.000489101	0.00135861	0.0030369	0.00671315	0.014705	0.0319674	0.0690496	0.148329	0.317117	0.675151	1.39634	2.72516	3.35121	4.02636	4.75061	5.80016	6.92337	7.66911	8.45167	4.06766	4.17864	4.29453	4.41582	4.54311	4.67707	4.8185	4.96835	5.12775	5.29807	5.48098	5.67856	5.89344	6.12895	6.3895	6.68097	7.01147	7.39263	7.84181	8.38649	9.01692
28	0	0	0	0	0	0	0	0	0	0	0	0	0	0	0	0	0	0	0	0	0	0	0	0	0	0	0	0	0	0	0	0	0	0	0	0	0	0	0	0	0	0	0	0	0	0	0	0	0
31	0	0	0	0	0	0	0	0	0	0	0.000112973	0.000202925	0.000360459	0.000634481	0.00110837	0.00192382	0.00332087	0.00570519	0.00976061	0.0164116	0.0274248	0.0433609	0.0607793	0.0796802	0.066709	0.0870924	0.108958	0.132306	0.0873493	0.0958735	0.105212	0.115441	0.126644	0.138912	0.152346	0.167055	0.183156	0.200781	0.220072	0.241184	0.264286	0.289563	0.317218	0.347471	0.380564	0.416759	0.456343	0.499631	0.543546
32	0	0	0	0	0	0	0	0	0	0	0	0	0	0	0	0	0	0	0	0	0	0	0	0	0	0	0	0.000122159	0.000247576	0.000501668	0.00101637	0.00205879	0.00416971	0.00844365	0.0170958	0.0346086	0.0700511	0.14177	0.39876	0.515452	0.666204	0.860933	1.11244	1.43725	1.93739	2.81147	3.7039	5.27017	7.632
36	0	0	0	0	0	0	0	0	0	0	0	0	0	0	0	0	0	0	0	0	0	0	0	0	0	0	0	0	0	0	0	0	0	0	0	0	0	0.178056	0.165006	0.158656	0.174366	0.226678	0.425954	0.911431	1.37048	1.7983	2.51047	3.03509	3.60497
40	0	0	0	0	0	0	0	0	0	0	0	0	0	0	0	0	0	0	0	0	0	0	0	0	0	0	0	0	0	0	0	0	0	0	0	0	0	0	0	0	0	0	0	0	0	0	0	0	0
44	0	0	0	0	0	0	0	0	0	0	0	0	0	0	0	0	0	0	0	0	0	0	0	0	0	0	0	0	0	0	0	0	0	0	0	0	0	0	0	0	0	0	0	0	0	0	0	0	0
48	0	0	0	0	0	0	0	0	0	0	0	0	0	0	0	0	0	0	0	0	0	0	0	0	0	0	0	0	0	0	0	0	0	0	0	0	0	0	0	0	0	0	0	0	0	0	0	0	0
50	0	0	0	0.156257	0.33172	0.658752	1.25284	2.31035	4.16119	7.3532	12.7855	15.2406	17.8808	20.9512	24.2378	27.7355	31.4391	36.9797	42.9032	50.6578	58.9217	64.0776	69.4002	72.2721	85.0487	93.8224	126.243	160.544	166.888	172.408	178.081	183.91	189.9	196.053	202.375	208.87	215.542	222.396	286.794	374.89	489.981	640.323	836.689	1093.14	1440.43	1897.84	2601.51	2925.24	3003.39
51	0	0	0	0	0	0	0	0	0	0	0	0	0	0	0	0	0	0	0	0	0	0	0	0	0	0	0	0	0	0	0	0	0	0	0	0	0	0	0	0	0	0	0	0	0	0	0	0	0
52	0	0	0	0	0	0	0	0	0	0	0	0	0	0	0	0	0	0	0	0	0	0	0	0	0	0	0	0	0	0	0	0	0	0	0	0	0	0	0	0	0	0	0	0	0	0	0	0	0
56	0	0	0	0	0	0	0	0	0	0	0	0	0	0	0	0	0	0	0	0	0	0	0	0	0	0	0	0	0	0	0	0	0	0	0	0	0	0	0	0	0	0	0	0	0	0	0	0	0
60	0	0	0	0	0	0	0	0	0	0	0	0	0	0	0	0	0	0	0	0	0	0	0	0	0	0	0	0	0	0	0	0	0	0	0	0	0	0	0	0	0	0	0	0	0	0	0	0	0
64	0	0	2.97408e-05	8.36461e-05	0.00013941	0.000217828	0.000326743	0.0004765	0.000680714	0.000957254	0.00132952	0.0022289	0.00369528	0.00607082	0.00989808	0.0160349	0.025834	0.0414235	0.0661439	0.0701526	0.0741613	0.0781701	0.0821788	0.0948063	0.108235	0.141307	0.196427	0.255556	0.282852	0.291881	0.301147	0.310656	0.320414	0.330427	0.340701	0.351242	0.362057	0.373152	0.480667	0.660674	0.907973	1.24768	1.71426	2.35504	3.30683	4.64274	6.51759	7.55247	8.03414
68	0	0	0	0	0	0	0	0	0	0	0	0	0	0	0	0	0	0	0	0	0	0	0	0	0	0	0	0.00207721	0.00428999	0.00885846	0.0182889	0.0377523	0.0779168	0.160787	0.331745	0.684372	1.41162	2.91127	6.00325	7.21033	8.65897	8.8687	9.08093	10.9625	9.52909	8.06195	13.2918	11.7436	13.5852
70	0	0	0	0	0	0	0	0	0	0	0	0	0	0	0	0	0	0	0	0	0	0	0	0	0	0	0	0	0	0	0	0	0	0	0	0	0	0	0	0	0	0	0	0	0	0	0	0	0
72	0	0	0	0	0	0	0	0	0	0	0	0	0	0	0	0	0	0	0	0	0	0	0	0	0	0	0	0	0	0	0	0	0	0	0	0	0	0	0	0	0	0	0	0	0	0	0	0	0
76	0	0	0	0	0	0	0	0	0	0	0	0	0	0	0	0	0	0	0	0	0	0	0	0	0	0	0	2.86414e-06	6.67757e-06	1.56463e-05	3.68485e-05	8.72319e-05	0.000207578	0.000496505	0.0011936	0.0028836	0.00699957	0.0170679	0.0442237	0.109886	0.282296	0.693161	1.65082	3.84619	8.81594	19.8281	49.7902	121.942	308.72
84	0	0	0	0	0	0	0	0	0	0	0	0	0	0	0	0	0	0	0	0	0	0	0	0	0	0	0	2.43295e-09	5.33493e-09	1.16963e-08	2.56388e-08	5.6192e-08	1.23135e-07	2.69787e-07	5.91009e-07	1.2945e-06	2.83496e-06	6.20771e-06	1.35911e-05	2.84149e-05	5.93991e-05	0.000124153	0.000259466	0.000542188	0.00123333	0.00280515	0.00637946	0.0145065	0.032777
86	0	0	0	0	0	0	0	0	0	0	0	0	0	0	0	0	0	0	0	0	0	0	0	0	0	0	0	0	0	0	0	0	0	0	0	0	0	0	0	0	0	0	0	0	0	0	0	0	0
90	0	0	2.3007e-11	6.47073e-11	1.61768e-10	3.79144e-10	8.53074e-10	1.8661e-09	3.99879e-09	8.43494e-09	1.75728e-08	4.41904e-08	1.09895e-07	2.70812e-07	6.62311e-07	1.60942e-06	3.88942e-06	9.35473e-06	2.24061e-05	5.3469e-05	0.00012718	0.000301623	0.000713454	0.00168358	0.00396424	0.00931595	0.0218529	0.0511758	0.0639808	0.0799334	0.0997887	0.124477	0.155142	0.193184	0.240318	0.298631	0.370657	0.459459	0.568716	0.593487	0.618201	0.642589	0.666305	0.688905	0.695634	0.699445	0.699516	0.69472	0.679167
92	0	0	0	0	0	0	0	0	0	0	0	0	0	0	0	0	0	0	0	0	0	0	0	0	0	0	0	0	0	0	0	0	0	0	0	0	0	0	0	0	0	0	0	0	0	0	0	0	0
96	0	0	9.54671e-10	2.68501e-09	6.71253e-09	1.57325e-08	3.53981e-08	7.74334e-08	1.65929e-07	3.50006e-07	7.29179e-07	1.83367e-06	4.56005e-06	1.12373e-05	2.74824e-05	6.67823e-05	0.000161391	0.000388172	0.000929735	0.00147912	0.00234547	0.00445005	0.0116956	0.0202392	0.034659	0.0452493	0.0884528	0.165714	0.17388	0.191772	0.211466	0.233141	0.256993	0.283237	0.312109	0.343868	0.378797	0.41721	0.459447	0.488133	0.518533	0.550747	0.584879	0.621039	0.639159	0.65772	0.708384	0.759746	0.806725
100	0	0	0	0	0	0	0	0	0	0	0	0	0	0	0	0	0	0	0	0	0.574619	0.658676	0.74021	0.83475	0.480467	0.729921	1.18903	1.23757	1.29659	1.3762	1.46046	1.54962	1.64396	1.74377	1.84936	1.96105	2.07919	2.20413	2.33625	2.47604	2.58416	2.75108	2.92842	3.01261	3.098	3.65039	4.23254	4.07777	4.78801
104	0	0	0	0.000433816	0.000932148	0.00187554	0.00361822	0.00677707	0.0124166	0.225315	0.699083	0.855761	1.02737	1.21369	1.41451	1.62962	1.85881	2.10186	2.35856	2.62871	2.91208	3.8196	4.79681	4.84103	5.99954	7.23187	8.44303	9.71891	10.0408	10.3676	10.6992	11.0357	11.377	11.7232	12.0743	12.4301	12.7908	13.1563	14.1919	15.2471	15.3018	156.174	300.075	447.001	596.946	749.906	1074.55	2109.95	2464.9
108	0	0	5.53912e-10	1.66174e-09	4.43129e-09	1.10782e-08	2.65878e-08	6.20381e-08	1.41801e-07	3.19053e-07	7.09007e-07	1.72892e-06	4.16925e-06	9.96289e-06	2.36274e-05	5.56747e-05	0.00013047	0.000304294	0.000706747	0.00140546	0.0026744	0.0051446	0.00955735	0.0173081	0.0307375	0.0537448	0.0924526	0.157461	0.162186	0.166305	0.170587	0.175048	0.179708	0.184587	0.189712	0.195112	0.200824	0.20689	0.213362	0.220307	0.227806	0.235962	0.244911	0.254834	0.265978	0.278695	0.293507	0.311232	0.331171
112	0	0	0	0	0	0	0	0	0	0	0	0	0	0	0	0	0	0	0	0	0	0	0	0	0	0	0	0	0	0	0	0	0	0	0	0	0	0	0	0	0	0	0	0	0	0	0	0	0
116	0	0	0	0	0.11815	0.314108	0.80359	2.0038	4.90756	11.8638	28.4056	34.0238	40.301	47.3023	55.099	63.7689	73.3967	84.0746	95.9032	106.888	118.41	136.674	156.037	176.481	197.99	220.545	254.048	289.277	296.467	303.741	311.1	318.543	326.07	333.681	341.375	349.154	357.015	364.961	372.989	381.101	392.639	406.366	420.519	435.112	450.156	485.163	525.161	568.392	611.269
120	0	0	3.382e-07	1.14142e-06	3.42427e-06	9.63076e-06	2.60031e-05	6.8258e-05	0.000175521	0.000444287	0.00111072	0.0021281	0.00403218	0.00757062	0.0141068	0.0261176	0.0480896	0.0881248	0.160818	0.292396	0.529893	0.638326	0.766927	0.919244	1.09943	1.31233	1.56363	1.85995	1.87026	1.91321	1.95763	2.00368	2.05151	2.10132	2.15332	2.2078	2.26504	2.32543	2.38943	2.45759	2.53061	2.60938	2.69505	2.78914	2.89374	3.01179	3.14759	3.30788	3.48198
124	0	0	0	0	0	0	0	0	0	0	0	0	0	0	0	0	0	0	0	0	0	0	0	0	0	0	0	0	0	0	0	0	0	0	0	0	0	0	0	0	0	0	0	0	0	0	0	0	0
132	0	0	0	0	0	0	0	0	0	0	0	0	0	0	0	0	0	0	0	0	0	0	0	0	0	0	0	0	0	0	0	0	0	0	0	0	0	0	0	0	0	0	0	0	0	0	0	0	0
136	0	0	0	0	0	0	0	0	0	0	0	0	0	0	0	0	0	0	0	0	0	0	0	0	0	0	0	0	0	0	0	0	0	0	0	0	0	0	0	0	0	0	0	0	0	0	0	0	0
140	0	0	4.01536e-07	1.35518e-06	4.06555e-06	1.14344e-05	3.08728e-05	8.10411e-05	0.000208391	0.000527491	0.00131873	0.00232716	0.00406126	0.00702323	0.0120536	0.0205545	0.0348586	0.0588357	0.098892	0.165609	0.276429	0.306707	0.339406	0.374697	0.412763	0.453798	0.498009	0.545616	0.55474	0.570357	0.586692	0.60382	0.621827	0.640815	0.6609	0.682226	0.704959	0.729305	0.755514	0.783896	0.814845	0.848863	0.886611	0.928976	0.977186	1.033	1.09906	1.17956	1.27369
144	0	0	0.00231612	0.00630552	0.0152424	0.0345022	0.0748803	0.157786	0.325222	0.658827	1.31591	1.70846	2.14873	2.63605	3.16975	3.74917	4.37364	5.04249	5.75507	6.5107	7.30871	8.62777	10.0325	10.1599	10.1475	11.344	14.7154	18.2943	18.6311	18.4975	18.3618	18.2241	18.0845	17.9432	17.8002	17.6558	17.51	17.3629	17.2147	17.0654	20.1819	25.5021	32.2208	36.7423	41.3514	41.3882	130.998	165.869	168.326
148	0	0	7.23656e-07	2.17097e-06	5.78925e-06	1.44731e-05	3.47355e-05	8.10495e-05	0.000185256	0.000416826	0.00092628	0.00177472	0.00336263	0.00631351	0.0117643	0.0217808	0.0401043	0.0734916	0.134114	0.225216	0.375925	0.638945	1.07786	1.85637	3.2471	5.43932	9.92386	17.7067	18.2951	18.4426	18.5847	18.7213	18.8519	18.9762	19.0939	19.2044	19.3073	19.4021	19.4882	19.5649	19.6315	19.6874	19.7317	19.7637	19.7828	19.7887	19.7821	19.7656	19.6233
152	0	0	0	0	0	0	0	0	0	0	0	0	0	0	0	0	0	0	0	0	0	0	0	0	0	0	0	1.05368e-07	2.19166e-07	4.55787e-07	9.47713e-07	1.97025e-06	4.09538e-06	8.51139e-06	1.76864e-05	3.67465e-05	7.63357e-05	0.000158554	0.000329283	0.000735985	0.00164479	0.00367534	0.00919387	0.0233699	0.0556929	0.131013	0.300215	0.681437	1.5802
156	0	0	0.0309763	0.112442	0.362408	1.09378	3.16512	8.8926	24.4389	39.6061	282.353	278.699	257.603	142.577	211.521	282.543	407.369	359.989	299.758	383.449	374.795	969.763	1160.54	940.611	873.525	1163.86	1298.44	1364.79	1446.61	1682.64	1811.52	2063.84	2605.74	2914.08	3294.31	4174.32	4575.85	4524.3	5357.81	5588.89	6222.16	6654.49	7026.35	6980.78	5985.93	6119.48	6376.49	6862.8	7284.93
158	0	0	0.000550674	0.00159913	0.00412328	0.00995556	0.023047	0.0518016	0.11389	0.246096	0.524312	0.614117	0.709548	0.810524	0.916959	1.02877	1.14587	1.26819	1.39563	1.52811	1.66554	2.16943	2.73694	3.37083	4.07376	4.84835	5.17921	27.594	31.883	34.0809	36.4238	38.9212	41.5828	44.4191	47.4412	50.6611	54.0912	57.745	61.6366	65.781	68.5444	71.8722	75.3516	78.8723	82.463	86.302	90.2162	104.677	279.115
162	0	0	0	0	0	0	0	0	0	0	0	0	0	0	0	0	0	0	0	0	0	0	0	0	0	0	0	0	0	0	0	0	0	0	0	0	0	0	0	0	0	0	0	0	0	0	0	0	0
166	0	0	0	0	0	0	0	0	0	0	0	0	0	0	0	0	0	0	0	0	0	0	0	0	0	0	0	0	0	0	0	0	0	0	0	0	0	0	0	0	0	0	0	0	0	0	0	0	0
170	0	0	0	0	0	0	0	0	0	0	0	0	0	0	0	0	0	0	0	0	0	0	0	0	0	0	0	1.32437e-07	2.87194e-07	6.20017e-07	1.33327e-06	2.85697e-06	6.1027e-06	1.29987e-05	2.76158e-05	5.85317e-05	0.00012379	0.000261286	0.000498785	0.000948603	0.00228186	0.00553869	0.0134422	0.0293354	0.0636674	0.155006	0.366486	0.879072	2.15946
174	0	0	0	0	0	0	0	0	0	0	0	0	0	0	0	0	0	0	0	0.00430486	0.0136525	0.0259029	0.0476548	0.085679	0.151308	0.263388	0.514868	0.964589	0.971336	1.0531	1.14154	1.2372	1.34066	1.45254	1.5735	1.70428	1.84565	1.99845	2.16359	2.34205	2.53488	2.74322	2.9683	3.21143	3.47403	3.75764	4.06392	4.39464	4.72202
175	0	0	0	0	0	0	0	0	0	0	0	0	0	0	0	0	0	0	0	0	0	0	0	0	0	0	0	0	0	0	0	0	0	0	0	0	0	0	0	0	0	0	0	0	0	0	0	0	0
178	0	0	1.44294e-07	4.32883e-07	1.15435e-06	2.88589e-06	6.92613e-06	1.6161e-05	3.69393e-05	8.31135e-05	0.000184697	0.000353873	0.000670496	0.00125889	0.00234576	0.004343	0.00799664	0.0146539	0.0267418	0.0486214	0.0881138	0.159217	0.286941	0.515894	0.925524	1.65713	2.96168	5.28439	5.31278	5.36007	5.40599	5.45048	5.49341	5.5347	5.57422	5.61182	5.64738	5.6807	5.71159	5.73984	5.76519	5.78734	5.80596	5.82067	5.83105	5.83665	5.83705	5.83201	5.78558
180	0	0	6.96864e-06	2.01337e-05	5.17593e-05	0.000124874	0.000289516	0.000653268	0.00144546	0.00315163	0.0067939	0.0148412	0.0321038	0.0689024	0.14694	0.311713	0.65835	1.38528	2.90559	5.20034	9.16251	11.2674	13.5374	15.9725	19.5013	23.2777	25.785	28.4161	29.0224	29.594	30.1802	30.7824	31.4021	32.0411	32.7015	33.3856	34.0964	34.8373	35.6124	36.4268	37.2867	38.2002	39.1774	40.2316	41.3811	42.6511	44.0785	45.7197	47.3697
184	0	0	0	0	0	0	0	0	0	0	0	0	0	0	0	0	0	0	0	0	0	0	0	0	0	0	0	0	0	0	0	0	0	0	0	0	0	0	0	0	0	0	0	0	0	0	0	0	0
188	0	0	0	0	0	0	0	0	0	0	0	0	0	0	0	0	0	0	0	0	0	0	0	0	0	0	0	2.93455e-07	6.43485e-07	1.41078e-06	3.09249e-06	6.77773e-06	1.48522e-05	3.2541e-05	7.12858e-05	0.000156139	0.000341946	0.000748757	0.00169299	0.00382521	0.00914096	0.0221274	0.0523363	0.121479	0.310921	0.805978	1.98786	5.1618	2.862
191	0	0	0	0	0	0	0	0	0	0	0	0	0	0	0	0	0	0	0	0	0	0	0	0	0	0	0	0	0	0	0	0	0	0	0	0	0	0	0	0	0	0	0	0	0	0	0	0	0
192	0	0	0	0	0	0	0	0	0	0	0	0	0	0	0	0	0	0	0	0	0	0	0	0	0	0	0	9.59415e-08	2.25955e-07	5.32064e-07	1.25266e-06	2.94868e-06	6.93993e-06	1.63311e-05	3.84244e-05	9.03931e-05	0.000212618	0.000500039	0.00117584	0.0027646	0.00701673	0.0177412	0.0448513	0.0962437	0.205813	0.445225	0.964311	2.08836	5.51544
196	0	0	0	0	0	0	0	0	0	0	0	0	0	0	0	0	0	0	0	0	0	0	0	0	0	0	0	0	0	0	0	0	0	0	0	0	0	0	0	0	0	0	0	0	0	0	0	0	0
203	0	0	0	0	0	0	0	0	0	0	0	0	0	0	0	0	0	0	0	0	0	0	0	0	0	0	0	0	0	0	0	0	0	0	0	0	0	0	0	0	0	0	0	0	0	0	0	0	0
204	0	0	2.25084e-07	8.44064e-07	2.81355e-06	8.79234e-06	2.6377e-05	7.69329e-05	0.000219808	0.000618211	0.00171725	0.0032902	0.00623406	0.0117048	0.0218101	0.0403799	0.0743503	0.136248	0.248637	0.452066	0.819255	0.986902	1.18573	1.42122	1.67324	1.94179	2.09189	2.09065	1.95556	1.82888	1.71012	1.59881	1.49451	1.39679	1.30526	1.21955	1.1393	1.06418	0.993881	0.942598	0.893843	0.8475	0.803459	0.761612	0.785695	0.810444	0.835876	0.862009	0.883304
208	0	0	0	0	0	0	0	0	0	0	0	0	0	0	0	0	0	0	0	0	0	0	0	0	0	0	0	0	0	0	0	0	0	0	0	0	0	0	0	0	0	0	0	0	0	0	0	0	0
212	0	0	0	0	0	0	0	0	0	0	0	0	0	0	0	0	0	0	0	0	0	0	0	0	0	0	0	0	0	0	0	0	0	0	0	0	0	0	0	0	0	0	0	0	0	0	0	0	0
214	0	0	0	0	0	0	0	0	0	0	0	0	0	0	0	0	0	0	0	0	0	0	0	0	0	0	0	1.85562	1.94261	2.03291	2.12658	2.22368	2.32428	2.42841	2.53613	2.64747	2.76245	2.88106	3.0033	3.21855	3.44739	3.69044	3.9483	4.22157	5.5257	7.22763	9.49552	12.3855	15.4501
218	0	0	0	0	0	0	0	0	0	0	0	0	0	0	0	0	0	0	0	0	0	0	0	0	0	0	0	1.18965e-07	2.41129e-07	4.88659e-07	9.9012e-07	2.00585e-06	4.06293e-06	8.22835e-06	1.66617e-05	3.37336e-05	6.82876e-05	0.000138216	0.000279716	0.000566	0.00143069	0.00330731	0.00764452	0.017325	0.0388038	0.0896051	0.199251	0.443016	1.02767
222	0	0	0	0	0	0	0	0	0	0	0	0	0	0	0	0	0	0	0	0	0	0	0	0	0	0	0.231101	0.2624	0.268866	0.27626	0.284948	0.295454	0.308535	0.325298	0.347361	0.413193	0.480509	0.549309	0.619594	0.691363	0.810222	0.931601	1.0555	1.25093	1.4504	1.75592	2.06768	2.38566	3.0635
226	0	0	0	0	0	0	0	0	0	0	0	0	0	0	0	0	0	0	0	0	0	0	0	0	0	0	0	0	0	0	0	0	0	0	0	0	0	0	0	0	0	0	0	0	0	0	0	0	0
231	0	0	0	0	0	0	0	0	0	0	0	0	0	0	0	0	0	0	0	0	0	0	0	0	0	0	0	0	0	0	0	0	0	0	0	0	0	0	0	0	0	0	0	0	0	0	0	0	0
232	0	0	0	0	0	0	0	0	0	0	0	0	0	0	0	0	0	0	0	0	0	0	0	0	0	0	0	0	0	0	0	0	0	0	0	0	0	0	0	0	0	0	0	0	0	0	0	0	0
233	0	0	0	0	0	0	0	0	0	0	0	0	0	0	0	0	0	0	0	0	0	0	0	0	0	0	0	0	0	0	0	0	0	0	0	0	0	0	0	0	0	0	0	0	0	0	0	0	0
234	0	0	0	0	0	0	0	0	0	0	0	0	0	0	0	0	0	0	0	0	0	0	0	0	0	0	0	0	0	0	0	0	0	0	0	0	0	0	0	0	0	0	0	0	0	0	0	0	0
238	0	0	0	0	0	0	0	0	0	0	0	0	0	0	0	0	0	0	0	0	0	0	0	0	0	0	0	0	0	0	0	0	0	0	0	0	0	0	0	0	0	0	0	0	0	0	0	0	0
242	0	0	0	0	0	0	0	0	0	0	0	0	0	0	0	0	0	0	0	0	0	0	0	0	0	0	0	0	0	0	0	0	0	0	0	0	0	0	0	0	0	0	0	0	0	0	0	0	3.816
246	0	0	0	0	0	0	0	0	0	0	0	0	0	0	0	0	0	0	0	0	0	0	0	0	0	0	0	0	0	0	0	0	0	0	0	0	0	0	0	0	0	0	0	0	0	0	0	0	0
250	0	0	0	0	0	0	0	0	0	0	0	0	0	0	0	0	0	0	0	0	1.68821	3.17702	4.51367	7.22175	5.22636	7.42454	9.53513	11.9172	12.4058	12.9031	13.4091	13.9237	14.447	14.9649	15.4911	16.0257	16.5686	17.1198	18.5549	19.8604	20.897	22.1969	23.5086	24.3121	24.99	26.0936	27.0094	27.8119	28.4531
254	0	0	0	0	0	0	0	0	0	0	0	0	0	0	0	0	0	0	0	0	0	0	0	0	0	0	0	0.02897	0.0322059	0.035779	0.0397201	0.0440619	0.0488388	0.0540869	0.0598433	0.0661456	0.0730314	0.0805369	0.0886952	0.0975348	0.107076	0.117326	0.128276	0.139889	0.152091	0.164751	0.177658	0.190475	0.201406
258	0	0	0	0	0	0	0	0	0	0	0	0	0	0	0	0	0	0	0	0	0	0	0	0	0	0	0	0	0	0	0	0	0	0	0	0	0	0	0	0	0	0	0	0	0	0	0	0	0
262	0	0	0	0	0	0	0	0	0	0	0	0	0	0	0	0	0	0	0	0	0	0	0	0	0	0	0	0	0	0	0	0	0	0	0	0	0	0	0	0	0	0	0	0	0	0	0	0	0
266	0	0	3.20253e-08	1.08085e-07	3.24256e-07	9.1197e-07	2.46232e-06	6.46358e-06	1.66206e-05	4.2071e-05	0.000105178	0.000201517	0.000381821	0.000716888	0.00133582	0.00247317	0.00455377	0.00834484	0.0152284	0.027688	0.0501774	0.090668	0.163402	0.293781	0.527049	0.94367	1.68656	3.00925	3.07119	3.09795	3.12386	3.14887	3.1729	3.1959	3.21777	3.23842	3.25775	3.27562	3.29191	3.30644	3.31901	3.3294	3.33732	3.34242	3.3443	3.34243	3.33616	3.32471	3.28649
268	0	0	0	0	0	0	0	0	0	0	0	0	0	0	0	0	0	0	0	0	0	0	0	0	0	0	0	0	0	0	0	0	0	0	0	0	0	0	0	0	0	0	0	0	0	0	0	0	0
270	0	0	6.81988e-09	2.04596e-08	5.4559e-08	1.36398e-07	3.27354e-07	7.63826e-07	1.74589e-06	3.92825e-06	8.72944e-06	1.67253e-05	3.16901e-05	5.94997e-05	0.000110869	0.000205266	0.00037795	0.000692599	0.00126391	0.00229802	0.00416458	0.00752519	0.0135619	0.024383	0.0437436	0.0783219	0.13998	0.24976	0.228521	0.209053	0.191211	0.174863	0.159887	0.14617	0.13361	0.122112	0.111586	0.101953	0.0931394	0.141336	0.214444	0.325326	0.493479	0.748454	1.13504	1.72108	2.60943	3.95584	5.95883
275	0	0	0	0	0	0	0	0	0	0	0	0	0	0	0	0	0	0	0	0	0	0	0	0	0	0	0	0	0	0	0	0	0	0	0	0	0	0	0	0	0	0	0	0	0	0	0	0	0
276	0	0	0	0	0	0	0	0	0	0	0	0	0	0	0	0	0	0	0	0	0	0	0	0	0	0	0	0	0	0	0	0	0	0	0	0	0	0	0	0	0	0	0	0	0	0	0	0	0
288	0	0	3.75166e-07	1.26619e-06	3.79856e-06	1.06835e-05	2.88453e-05	7.5719e-05	0.000194706	0.000492849	0.00123212	0.00236071	0.00447292	0.00839813	0.0156487	0.0289724	0.0533461	0.0977573	0.178396	0.324356	0.587813	1.06215	1.9142	3.44156	6.17423	11.0548	19.7575	35.2525	35.5463	35.8296	36.1016	36.3617	36.6089	36.8424	37.0611	37.2638	37.4491	37.6156	37.7612	37.8841	37.9816	38.0509	38.0885	38.0902	38.0509	37.9644	37.823	37.6176	37.105
292	0	0	0	0	0	0	0	0	0	0	0	0	0	0	0	0	0	0	0	0	0	0	0	0	0	0	0	0	0	0	0	0	0	0	0	0	0	0	0	0	0	0	0	0	0	0	0	0	0
296	0	0	0	0	0	0	0	0	0	0	0	0	0	0	0	0	0	0	0	0	0	0	0	0	0	0	0	0	0	0	0	0	0	0	0	0	0	0	0	0	0	0	0	0	0	0	0	0	0
300	0	0	0	0	0	0	0	0	0	0	0	0	0	0	0	0	0	0	0	0	0.962939	1.64428	1.87266	2.0983	1.58104	1.83479	2.8693	2.98641	3.16275	3.34267	3.52619	3.71331	3.90401	4.09831	4.2962	4.49768	4.70276	4.91143	5.12369	5.33954	5.91952	6.56089	7.27251	8.05869	8.9312	9.99603	11.184	12.5135	13.4728
304	0	0	0	0	0	0	0	0	0	0	0	0	0	0	0	0	0	0	0	0	0	0	0	0	0	0	0	0	0	0	0	0	0	0	0	0	0	0	0	0	0	0	0	0	0	0	0	0	0
308	0	0	0	0	0	0	0	0	0	0	0	0	0	0	0	0	0	0	0	0	0	0	0	0	0	0	0	0	0	0	0	0	0	0	0	0	0	0	0	0	0	0	0	0	0	0	0	0	0
312	0	0	0	0	0	0	0	0	0	0	0	0	0	0	0	0	0	0	0	0	0	0	0	0	0	0	0	0	0	0	0	0	0	0	0	0	0	0	0	0	0	0	0	0	0	0	0	0	0
316	0	0	0	0	0	0	0	0	0	0	0	0	0	0	0	0	0	0	0	0	0	0	0	0	0	0	0	0	0	0	0	0	0	0	0	0	0	0	0	0	0	0	0	0	0	0	0	0	0
320	0	0	0	0	0	0	0	0	0	0	0	0	0	0	0	0	0	0	0	0	0	0	0	0	0	0	0	0.000553547	0.0011068	0.00221261	0.00442253	0.00883821	0.0176599	0.0352813	0.0704749	0.140754	0.281075	0.561206	1.12037	1.1185	1.27738	1.45379	1.65436	1.89959	2.14993	2.36161	2.51334	2.67451	2.97791
324	0	0	3.88216e-07	1.31023e-06	3.93068e-06	1.1055e-05	2.98486e-05	7.83526e-05	0.000201478	0.000509992	0.00127498	0.00244282	0.0046285	0.00869024	0.016193	0.0299802	0.0552016	0.101158	0.184601	0.335638	0.608258	1.09909	1.98078	3.56127	6.38898	11.4393	20.4447	36.4787	37.2101	37.9621	38.7367	39.5362	40.363	41.2203	42.1114	43.0406	44.0128	45.0337	46.1105	47.252	48.469	49.7755	51.1892	52.7339	54.4417	56.3579	58.5488	61.1172	63.8322
328	0	0	0	0	0	0	0	0	0	0	0	0	0	0	0	0	0	0	0	0	0	0	0	0	0	0	0	2.08156e-07	4.41952e-07	9.38178e-07	1.99124e-06	4.2256e-06	8.96571e-06	1.90201e-05	4.03437e-05	8.55604e-05	0.000181429	0.000384663	0.000815443	0.00173668	0.0036982	0.00787416	0.0167634	0.0356836	0.078164	0.171196	0.374914	0.820954	1.78622
332	0	0	0	0	0	0	0	0	0	0	0	0	0	0	0	0	0	0	0	0	0	0	0	0	0	0	0	0.000931378	0.00147468	0.00233451	0.00369504	0.00584752	0.00925241	0.0146376	0.0231536	0.0366187	0.0579061	0.0915554	0.144738	0.228783	0.326916	0.442809	0.599711	0.843623	1.17436	1.58146	2.25424	3.21288	4.67674
334	0	0	0	0	0	0	0	0	0	0	0	0	0	0	0	0	0	0	0	0	0	0	0	0	0	0	0	0	0	0	0	0	0	0	0	0	0	0	0	0	0	0	0	0	0	0	0	0	0
336	0	0	0	0	0	0	0	0	0	0	0	0	0	0	0	0	0	0	0	0	0	0	0	0	0	0	0	0	0	0	0	0	0	0	0	0	0	0	0	0	0	0	0	0	0	0	0	0	0
340	0	0	0	0	0	0	0	0	0	0	0	0	0	0	0	0	0	0	0	0	0	0	0	0	0	0	0	9.10817e-09	1.90958e-08	4.00283e-08	8.38927e-08	1.75796e-07	3.68321e-07	7.71568e-07	1.61606e-06	3.38434e-06	7.08645e-06	1.48362e-05	3.10566e-05	6.50022e-05	0.000250474	0.00059108	0.00139468	0.00314004	0.00683749	0.014887	0.032409	0.0705467	0.152586
0	0	0	0	0	0	0	0	0	0	0	0	0	0	0	0	0	0	0	0	0	0	0	0	0	0	0	0	0	0	0	0	0	0	0	0	0	0	0	0	0	0	0	0	0	0	0	0	0	0
348	0	0	0	0	0	0	0	0	0	0	0	0	0	0	0	0	0	0	0	0	0.600606	0.759685	1.06486	1.745	1.46093	1.90733	1.98849	2.48359	2.78835	3.10026	3.41932	3.74553	4.07888	4.41939	4.76704	5.12184	5.48379	5.85289	6.22914	6.61254	7.55808	8.52339	9.16649	9.70164	10.356	11.2439	12.2625	13.6997	14.9912
352	0	0	0	0	0	0	0	0	0	0	0	0	0	0	0	0	0	0	0	0	0	0	0	0	0	0	0	0	0	0	0	0	0	0	0	0	0	0	0	0	0	0	0	0	0	0	0	0	0
356	0	0	0	0.565761	1.43755	3.42038	7.80282	17.2826	37.4438	79.7312	167.395	195.597	225.502	257.083	290.316	325.175	361.635	399.67	439.255	480.363	522.971	567.052	612.582	659.533	707.882	757.603	808.67	1023.96	1060.18	1096.97	1134.33	1172.26	1210.77	1249.84	1289.47	1329.68	1370.45	1411.79	1817.11	2293	3053.34	3786.79	5235.79	6956.49	9219.21	11698.4	16061.4	17034.5	15129.1
360	0	0	0.00166507	0.00453307	0.0109578	0.0248038	0.0538318	0.113433	1.37165	4.14272	9.68722	11.7236	13.9397	16.333	18.9008	21.6408	24.5502	27.6264	30.867	34.2693	37.8308	44.107	50.7753	57.8296	76.8103	97.0806	110.496	127.942	130.951	133.994	137.07	140.178	143.32	152.296	161.443	170.76	180.247	189.904	202.803	215.94	229.315	242.927	256.775	330.871	406.465	483.556	562.14	642.216	1422.51
364	0	0	3.09039e-06	9.68955e-06	5.29432e-05	0.000187299	0.000589992	0.00147498	0.0032871	0.00682705	0.0227568	0.0397408	0.0685215	0.116901	0.197658	0.331642	0.552737	0.80652	1.16046	1.93625	3.21314	5.36247	8.90127	9.80226	16.4864	27.5505	53.8554	84.0804	87.8731	89.9271	91.9798	94.0269	96.0636	98.0845	100.084	102.055	103.99	105.88	107.716	109.488	115.038	120.397	125.538	130.427	135.028	153.862	171.919	184.399	194.751
368	0	0	5.01508e-06	1.25488e-05	2.79226e-05	9.51907e-05	0.00051403	0.00149925	0.00449776	0.0108428	0.0144571	0.0254487	0.0442004	0.0726149	0.118394	0.18308	0.280916	0.788261	1.79811	2.57456	3.62891	3.34693	2.76459	2.10869	2.20677	2.30485	3.00366	2.501	2.53478	2.56857	2.60237	2.63618	2.67	2.70383	2.73767	2.77153	2.80539	2.83927	3.02387	3.22003	3.42847	3.64992	3.88519	4.13512	4.77778	5.51967	6.37603	7.36441	8.4519
372	0	0	0	0	0	0	0	0	0	0	0	0	0	0	0	0	0	0	0	0	0	0	0	0	0	0	0	0	0	0	0	0	0	0	0	0	0	0	0	0	0	0	0	0	0	0	0	0	0
376	0	0	0	0	0	0	0	0	0	0	0	0	0	0	0	0	0	0	0	0	0	0	0	0	0	0	0	0	0	0	0	0	0	0	0	0	0	0	0	0	0	0	0	0	0	0	0	0	0
380	0	0	0	0	0	0	0	0	0	0	0	0	0	0	0	0	0	0	0	0	4.69606	9.28107	12.7592	19.6788	13.1802	15.4868	23.8114	25.1717	26.2919	27.5564	28.8768	30.2555	31.695	33.1978	34.7665	36.404	38.113	39.8966	41.7579	43.7002	47.1316	50.8269	54.806	59.0873	61.1599	65.6109	181.42	154.85	137.376
384	0	0	1.0699e-06	3.37018e-06	9.43652e-06	2.47709e-05	6.24226e-05	0.000152935	0.000367045	0.000867143	0.00202333	0.00387664	0.00734521	0.013791	0.0256975	0.0475771	0.0876024	0.160532	0.292953	0.532642	0.965278	1.74421	3.14341	5.65156	10.139	18.1537	32.4449	57.89	59.0454	60.2305	61.448	62.7009	63.9927	65.3273	66.7095	68.1449	69.6397	71.202	72.8411	74.5685	76.3985	78.3494	80.4444	82.7142	85.2005	87.9616	91.0825	94.6938	98.3926
388	0	0	0	0	0	0	0	0	0	0	0	0	0	0	0	0	0	0	0	0	0	0	0	0	0	0	0	3.18065e-09	7.52047e-09	1.77787e-08	4.20223e-08	9.93091e-08	2.34654e-07	5.54371e-07	1.3095e-06	3.09277e-06	7.3034e-06	1.72441e-05	4.07097e-05	8.45922e-05	0.000175754	0.000365111	0.000758384	0.00157507	0.00360939	0.00827022	0.0189474	0.0434043	0.0987973
392	0	0	0.0035334	0.0115434	0.0334847	0.0909541	0.236878	0.59897	1.48149	3.60141	8.63196	15.7357	23.806	40.0155	57.8571	91.3061	127.183	198.003	249.612	297.766	284.423	297.528	308.748	351.23	442.06	570.683	757.196	1112.79	1209.44	1209.47	1208.69	1207.08	1204.57	1192.84	1180.17	1166.53	1151.85	1136.08	1159.43	1180.81	1199.98	1216.65	1230.49	1255.22	1275.72	1338.07	1645.02	1710.53	1790.37
398	0	0	0	0	0	0	0	0	0	0	0	0	0	0	0	0	0	0	0.323725	0.526722	0.853792	0.919507	0.987228	1.15402	1.35443	1.57967	1.8804	2.20019	2.20833	2.2159	2.22291	2.22937	2.23527	2.24061	2.24539	2.24961	2.25328	2.25639	2.25894	2.26093	2.26236	2.26324	2.26355	2.26331	2.26252	2.94337	3.51359	4.81752	6.10969
400	0	0	0	0	0	0	0	0	0	0	0	0	0	0	0	0	0	0	0	0	0	0	0	0	0	0	0	0	0	0	0	0	0	0	0	0	0	0	0	0	0	0	0	0	0	0	0	0	0
404	0	0	0	0	0	0	0	0	0	0	0	0	0	0	0	0	0	0	0	0	0	0	0	0	0	0	0	0.678902	0.813625	0.951656	1.09299	1.23764	1.35794	1.39373	1.43127	1.47079	1.51253	1.55681	1.604	1.65456	1.70907	1.76828	1.83314	1.90495	1.98544	2.07713	2.18369	2.31091	2.45311
408	0	0	0	0.121378	0.183682	0.259192	0.348985	0.453677	0.573151	0.706185	0.849968	1.19722	1.66743	2.30095	3.1507	4.28605	5.79769	7.80401	10.4593	12.2799	14.1906	17.6558	24.3399	18.8262	22.5984	26.5157	33.9609	43.4162	48.2397	51.3561	54.6644	58.1762	61.9036	65.8593	70.0571	74.5111	79.2367	84.2498	89.5676	95.2079	97.8219	99.253	100.692	102.139	103.595	105.003	107.012	109.046	110.412
410	0	0	0	0.126621	0.194859	0.280175	0.3853	0.513059	0.666245	0.847436	1.05873	1.6088	2.41743	3.59933	5.31819	7.8071	11.3972	16.558	23.9538	28.2561	32.8099	41.0223	56.8353	44.1849	53.3141	62.8876	80.9816	104.1	115.857	125.614	136.169	147.588	159.938	173.294	187.737	203.354	220.237	238.488	258.215	279.536	285.768	289.243	292.723	298.836	305.004	309.444	313.904	318.4	683.097
414	0	0	0	0	0	0	0	0	0	0	0	0	0	0	0	0	0	0	0	0	0	0	0	0	0	0	0	0	0	0	0	0	0	0	0	0	0	0	0	0	0	0	0	0	0	0	0	0	0
417	0	0	8.85107e-07	2.32341e-06	5.42128e-06	1.18591e-05	2.4904e-05	5.08457e-05	0.000101691	0.000200205	0.000389287	0.000699245	0.00124208	0.00218631	0.00381926	0.00662915	0.0114432	0.0196591	0.0336334	0.0558342	0.0922261	0.104988	0.118548	0.132905	0.14806	0.164013	0.19542	0.22882	0.244927	0.261936	0.280079	0.299429	0.320065	0.342069	0.365531	0.390544	0.417207	0.445628	0.475919	0.508201	0.5426	0.579253	0.618303	0.659905	0.704221	0.751425	0.801699	0.85524	0.906555
418	0	0	0.000178584	0.000486186	0.00117526	0.00266029	0.00577363	0.012166	0.0250762	0.0507988	0.101463	0.121466	0.143798	0.168689	0.196388	0.227168	0.261325	0.299182	0.341091	0.423034	0.511384	0.606045	0.706919	0.813911	0.926923	1.04586	1.35668	1.68664	1.7368	1.78767	1.83924	1.89151	1.94448	1.99814	2.0525	2.10756	2.16331	2.21975	2.50137	2.78869	54.2701	59.5302	64.8902	70.35	75.9094	81.5684	121.441	246.847	273.979
422	0	0	0	0	0	0	0	0	0	0	0	0	0	0	0	0	0	0	0	0	0	0	0	0	0	0	0	0	0	0	0	0	0	0	0	0	0	0	0	0	0	0	0	0	0	0	0	0	0
426	0	0	0	0	0	0	0	0	0	0	0	0	0	0	0	0	0	0	0	0	0	0	0	0	0	0	0	0	0	0	0	0	0	0	0	0	0	0	0	0	0	0	0	0	0	0	0	0	0
428	0	0	0	0	0	0	0	0	0	0	0	0	0	0	0	0	0	0	0	0	0	0	0	0	0	0	0	0	0	0	0	0	0	0	0	0	0	0	0	0	0	0	0	0	0	0	0	0	0
430	0	0	2.02113e-06	6.82132e-06	2.0464e-05	5.75549e-05	0.000155398	0.00040792	0.00104894	0.00265512	0.00663781	0.0117138	0.0204423	0.0353514	0.0606717	0.103461	0.175461	0.296149	0.497772	0.83359	1.39141	2.31571	3.84389	6.36537	10.5181	17.3456	28.5532	46.9241	47.9944	49.0992	50.2415	51.4251	52.6541	53.9332	55.268	56.6651	58.1324	59.6793	61.3171	63.06	64.9254	66.9355	69.1193	71.5147	74.174	77.1704	80.6118	84.6657	89.0518
434	0	0	0	0	0	0	0	0	0	0	0	0	0	0	0	0	0	0	0	0	0	0	0	0	0	0	0	0	0	0	0	0	0	0	0	0	0	0	0	0	0	0	0	0	0	0	0	0	0
438	0	0	0	0	0	0	0	0	0	0	0	0	0	0	0	0	0	0	0	0	0	0	0	0	0	0	0	0	0	0	0	0	0	0	0	0	0	0	0	0	0	0	0	0	0	0	0	0	0
440	0	0	0	0	0	0	0	0	0	0	0	0	0	0	0	0	0	0	0	0	0	0	0	0	0	0	0	0	0	0	0	0	0	0	0	0	0	0	0	0	0	0	0	0	0	0	0	0	0
442	0	0	0	0	0	0	0	0	0	0	0	0	0	0	0	0	0	0	0	0	0	0	0	0	0	0	0	0	0	0	0	0	0	0	0	0	0	0	0	0	0	0	0	0	0	0	0	0	0
446	0	0	0	0	0	0	0	0	0	0	0	0	0	0	0	0	0	0	0	0	0	0	0	0	0	0	0	0	0	0	0	0	0	0	0	0	0	0	0	0	0	0	0	0	0	0	0	0	0
450	0	0	1.28504e-08	4.33701e-08	1.3011e-07	3.65935e-07	9.88025e-07	2.59357e-06	6.66917e-06	1.68813e-05	4.22033e-05	0.000141505	0.000469202	0.00154166	0.00502716	0.016288	0.0524836	0.168309	0.537504	1.28268	2.71195	6.07441	12.3962	23.9334	44.5273	91.5594	173.865	319.345	325.68	330.397	335.16	339.975	344.851	349.795	354.818	359.933	365.156	370.506	376.009	381.697	387.61	393.806	400.36	407.378	415.014	423.499	433.197	444.718	456.302
454	0	0	5.4464e-07	1.53576e-06	3.84996e-06	9.04976e-06	2.04253e-05	4.48283e-05	9.63987e-05	0.000204102	0.000426902	0.00087473	0.00177248	0.00355902	0.00709226	0.0140427	0.0276519	0.0541914	0.105761	0.197814	0.360548	0.456044	0.559336	0.670424	0.789307	0.915986	1.03614	1.16291	1.19712	1.23604	1.27708	1.32046	1.36646	1.41539	1.46762	1.52361	1.58389	1.64913	1.72013	1.79793	1.8838	1.97944	2.08706	2.20968	2.35154	2.51878	2.72077	2.97267	3.28042
458	0	0	0.000281226	0.000767602	0.00186063	0.004224	0.0091959	0.0194415	0.0402131	0.0817674	0.163968	0.223018	0.299968	0.399801	0.52882	0.694985	0.908333	1.18151	1.53041	1.8998	2.29812	2.89374	3.53312	4.2156	4.94051	5.70716	6.42607	7.17899	7.3867	7.62335	7.8728	8.13645	8.41595	8.71323	9.03058	9.37071	9.73694	10.1333	10.5646	11.0372	11.559	12.1402	12.7942	13.5396	14.4021	15.4192	16.6479	18.1807	20.0535
462	0	0	0	0	0	0	0	0	0	0	0	0	0	0	0	0	0	0	0	0	0	0	0	0	0	0	0	0	0	0	0	0	0	0	0	0	0	0	0	0	0	0	0	0	0	0	0	0	0
466	0	0	1.78901e-07	5.03159e-07	1.2579e-06	2.9482e-06	6.63345e-06	1.45107e-05	3.10943e-05	6.55895e-05	0.000136645	0.000218172	0.000344483	0.000538986	0.000836935	0.00129127	0.00198132	0.00302566	0.00460123	0.00643901	0.00895651	0.0126859	0.0178336	0.025342	0.0368343	0.0520807	0.0791829	0.117736	0.151773	0.194358	0.248972	0.319048	0.409019	0.524616	0.673256	0.864561	1.11104	1.429	1.83977	2.37134	3.06064	3.95665	5.12484	6.65355	8.66342	11.322	14.8676	19.65	26.0464
470	0	0	0	0	0	0	0	0	0	0	0	0	0	0	0	0	0	0	0	0	0	0	0	0	0	0	0	0	0	0	0	0	0	0	0	0	0	0	0	0	0	0	0	0	0	0	0	0	0
474	0	0	0	0	0	0	0	0	0	0	0	0	0	0	0	0	0	0	0	0	0	0	0	0	0	0	0	0	0	0	0	0	0	0	0	0	0	0	0	0	0	0	0	0	0	0	0	0	0
478	0	0	2.20711e-07	6.62132e-07	1.76569e-06	4.41421e-06	1.05941e-05	2.47196e-05	5.65019e-05	0.000127129	0.00028251	0.000541279	0.00102558	0.00192558	0.00358804	0.006643	0.0122316	0.0224145	0.0409038	0.0686895	0.114655	0.194874	0.328741	0.57521	0.985032	1.65896	3.02672	5.40044	5.46025	5.49396	5.52535	5.55427	5.58055	5.60399	5.62437	5.64142	5.65487	5.66435	5.6695	5.66982	5.66478	5.6537	5.63576	5.60995	5.57498	5.52919	5.47039	5.39557	5.26737
480	0	0	0	0	0	0	0	0	0	0	0	0	0	0	0	0	0	0	0	0	0	0	0	0	0	0	0	0	0	0	0	0	0	0	0	0	0	0	0	0	0	0	0	0	0	0	0	0	0
484	0	0	0	0	0	0	0	0	0	0	0	0	0	0	0	0	0	0	0	0	0	0	0	0	0	0	2.78161	11.5806	12.7198	13.8849	15.076	16.2929	17.5358	18.8046	20.0993	21.4199	22.7665	24.1389	25.5373	26.9616	28.4118	29.8879	31.39	32.9179	34.4718	36.0516	42.9959	49.9297	80.136
492	0	0	0	0	0	0	0	0	0	0	0	0	0	0	0	0	0	0	0	0	0	0	0	0	0	0	0	0	0	0	0	0	0	0	0	0	0	0	0	0	0	0	0	0	0	0	0	0	0
496	0	0	0	0	0	0	0	0	0	0	0	0	0	0	0	0	0	0	0	0	0	0	0	0	0	0	0	0	0	0	0	0	0	0	0	0	0	0	0	0	0	0	0	0	0	0	0	0	0
498	0	0	0	0	0	0	0	0	0	0	0	0	0	0	0	0	0	0	0	0	0	0	0	0	0	0	0	0	0	0	0	0	0	0	0	0	0	0	0	0	0	0	0	0	0	0	0	0	0
500	0	0	0	0	0	0	0	0	0	0	0	0	0	0	0	0	0	0	0	0	0	0	0	0	0	0	0	0	0	0	0	0	0	0	0	0	0	0	0	0	0	0	0	0	0	0	0	0	0
504	0	0	5.68083e-07	1.91728e-06	5.75184e-06	1.61771e-05	4.36781e-05	0.000114655	0.000294827	0.000746281	0.0018657	0.00334203	0.00592023	0.0103923	0.0181044	0.0313381	0.0539472	0.0924264	0.157693	0.27301	0.468018	0.46865	0.466753	0.546632	0.51229	0.445882	0.697284	0.564468	0.59757	0.631346	0.665794	0.700916	0.736711	0.773179	0.81032	0.848134	0.886621	0.925781	0.965614	1.00612	1.20005	1.39811	1.60033	1.80669	2.01719	2.23184	2.45063	2.67357	2.88252
508	0	0	1.1218e-06	3.53366e-06	9.89425e-06	2.59724e-05	6.54505e-05	0.000160354	0.000384849	0.000909205	0.00212148	0.00400117	0.00746271	0.0137927	0.0252991	0.0461076	0.08357	0.15075	0.270803	0.619309	1.28093	1.98025	2.74419	3.57276	4.46595	5.42376	7.0682	8.82804	9.24195	9.66365	10.0932	10.5304	10.9755	11.4284	11.8891	12.3576	12.8338	13.3179	13.8098	14.3094	14.8256	16.66	18.7191	21.0302	22.5901	24.2629	26.0565	27.9795	29.8534
512	0	0	0	0	0	0	0	0	0	0	0	0	0	0	0	0	0	0	0	0	0	0	0	0	0	0	0	0	0	0	0	0	0	0	0	0	0	0	0	0	0	0	0	0	0	0	0	0	0
516	0	0	0	0	0	0	0	0	0	0	0	0	0	0	0	0	0	0	0	0	0	0	0	0	0	0	0	0	0	0	0	0	0	0	0	0	0	0	0	0	0	0	0	0	0	0	0	0	0
520	0	0	0	0	0	0	0	0	0	0	0	0	0	0	0	0	0	0	0	0	0	0	0	0	0	0	0	0	0	0	0	0	0	0	0	0	0	0	0	0	0	0	0	0	0	0	0	0	0
524	0	0	0.000684582	0.00186374	0.00450523	0.0101979	0.0221325	0.046637	0.0961267	0.194731	0.388948	0.451412	0.518093	0.589219	0.66503	0.745777	0.831723	0.923144	1.02033	1.11582	1.21479	1.35968	1.51188	1.67128	1.83777	2.01121	2.60893	3.24344	3.36556	3.48967	3.61578	3.74389	3.87398	4.00607	4.14014	4.27619	4.41422	4.55423	4.69621	4.84016	89.0591	93.7802	98.7392	103.756	108.856	115.77	170.776	334.373	407.748
528	0	0	0	0	0	0	0	0	0	0	0	0	0	0	0	0	0	0	0	0	0	0	0	0	0	0	0	0	0	0	0	0	0	0	0	0	0	0	0	0	0	0	0	0	0	0	0	0	0
530	0	0	0	0	0	0	0	0	0	0	0	0	0	0	0	0	0	0	0	0	0	0	0	0	0	0	0	0	0	0	0	0	0	0	0	0	0	0	0	0	0	0	0	0	0	0	0	0	0
533	0	0	0	0	0	0	0	0	0	0	0	0	0	0	0	0	0	0	0	0	0	0	0	0	0	0	0	9.12477e-10	2.00087e-09	4.38672e-09	9.61585e-09	2.10748e-08	4.61819e-08	1.01184e-07	2.21658e-07	4.85503e-07	1.06325e-06	2.3282e-06	5.09735e-06	1.0657e-05	2.22777e-05	4.65637e-05	9.73128e-05	0.000224281	0.000555892	0.00183368	0.0044584	0.0116012	0.0228633
540	0	0	0	0	0	0	0	0	0	0	0	0	0	0	0	0	0	0	0	0	0	0	0	0	0	0	0	0	0	0	0	0	0	0	0	0	0	0	0	0	0	0	0	0	0	0	0	0	0
548	0	0	0	0	0	0	0	0	0	0	0	0	0	0	0	0	0	0	0	0	0	0	0	0	0	0	0	0	0	0	0	0	0	0	0	0	0	0	0	0	0	0	0	0	0	0	0	0	0
554	0	0	0	0	0	0	0	0	0	0	0	0	0	0	0	0	0	0	0	0	0	0	0	0	0	0	0	0	0	0	0	0	0	0	0	0	0	0	0	0	0	0	0	0	0	0	0	0	0
558	0	0	0	0	0	0	0	0	0	0	0	0	0	0	0	0	0	0	0	0	0	0	0	0	0	0	0	2.53983e-08	5.51506e-08	1.19735e-07	2.59907e-07	5.64083e-07	1.22405e-06	2.65575e-06	5.76115e-06	1.24959e-05	2.70995e-05	5.87617e-05	0.000127399	0.000276173	0.000662048	0.00156233	0.0036864	0.00791443	0.0169323	0.0390204	0.0901486	0.208246	0.477995
562	0	0	0	0	0	0	0	0	0.0538442	0.0807663	0.119654	0.152835	0.193055	0.241647	0.300183	0.370511	0.454807	0.555627	0.67597	0.756767	0.842117	0.95421	1.07313	1.25013	1.40173	1.60457	1.95166	2.32151	2.39569	2.44761	2.50114	2.55645	2.6137	2.6731	2.73489	2.79935	2.8668	2.93765	3.01238	3.09157	3.17597	3.2665	3.36437	3.47118	3.58908	3.72112	3.87175	4.04787	4.23429
566	0	0	0	0	0	0	0	0	0	0	0	0	0	0	0	0	0	0	0	0	0	0	0	0	0	0	0	0	0	0	0	0	0.457864	0.584688	0.74688	0.954424	1.22018	1.56074	1.99759	2.55855	3.27986	4.20884	5.40767	6.95856	8.97121	11.5939	15.0304	19.5684	25.4702
570	0	0	0	0	0	0	0	0	0	0	0	0	0	0	0	0	0	0	0	0	0	0	0	0	0	0	0	0	0	0	0	0	0	0	0	0	0	0	0	0	0	0	0	0	0	0	0	0	0
574	0	0	0	0	0	0	0	0	0	0	0	0	0	0	0	0	0	0	0	0	0	0	0	0	0	0	0	0	0	0	0	0	0	0	0	0	0	0	0	0	0	0	0	0	0	0	0	0	0
578	0	0	0	0	0	0	0	0	0	0	0	0	0	0	0	0	0	0	0	0	0	0	0	0	0	0	0	0	0	0	0	0	0	0	0	0	0	0	0	0	0	0	0	0	0	0	0	0	0
580	0	0	0	0	0	0	0	0	0	0	0	0	0	0	0	0	0	0	0	0	0	0	0	0	0	0	0	0	0	0	0	0	0	0	0	0	0	0	0	0	0	0	0	0	0	0	0	0	0
583	0	0	0	0	0	0	0	0	0	0	0	0	0	0	0	0	0	0	0	0	0	0	0	0	0	0	0	0	0	0	0	0	0	0	0	0	0	0	0	0	0	0	0	0	0	0	0	0	0
584	0	0	0	0	0	0	0	0	0	0	0	0	0	0	0	0	0	0	0	0	0	0	0	0	0	0	0	0	0	0	0	0	0	0	0	0	0	0	0	0	0	0	0	0	0	0	0	0	0
585	0	0	0	0	0	0	0	0	0	0	4.32949e-06	9.07282e-06	1.88022e-05	3.86117e-05	7.86924e-05	0.000159352	0.000320917	0.000643218	0.00128384	0.00255309	0.0050606	0.0100015	0.0197145	0.0387679	0.0760708	0.148972	0.291208	0.568302	0.606359	0.646852	0.689933	0.735762	0.78451	0.836356	0.891492	0.950122	1.01246	1.07874	1.14919	1.22748	1.31093	1.39987	1.49466	1.59567	1.6693	1.74611	1.82625	1.90985	1.98457
586	0	0	0.00235785	0.00884195	0.0294732	0.0921036	0.276311	0.805907	2.30259	6.47604	17.989	21.5837	25.4896	30.0646	35.0132	40.3352	46.0306	54.5116	63.6773	75.7062	88.6689	97.1032	105.911	111.077	131.65	146.277	198.252	253.962	259.986	268.782	277.83	287.134	296.703	306.543	316.66	327.063	337.759	348.755	360.059	371.679	383.624	395.901	408.52	421.489	434.817	448.514	462.588	477.05	488.836
591	0	0	0	0	0	0	0	0	0	0	0	0	0	0	0	0	0	0	0	0	0	0	0	0	0	0	0	0.00159935	0.00341194	0.00727756	0.0155201	0.0330929	0.0705511	0.150385	0.320509	0.682985	1.45519	3.10002	6.60314	7.4679	8.4448	9.54825	10.7945	12.5754	14.3937	15.9786	18.8474	22.2288	28.6389
598	0	0	9.71088e-07	3.27742e-06	9.83226e-06	2.76532e-05	7.46637e-05	0.000195992	0.00050398	0.0012757	0.00318925	0.00560129	0.00972855	0.0167437	0.0285995	0.0485374	0.0819229	0.137614	0.230203	0.383672	0.637364	1.05571	1.74405	2.87434	4.72691	7.75813	12.7101	20.7883	20.8614	20.92	20.963	20.9895	20.9981	20.9876	20.9563	20.9027	20.8247	20.7201	20.5864	20.4203	20.2185	19.9764	19.689	19.3498	18.9251	18.4312	17.8541	17.1746	16.2625
600	0	0	0	0	0	0	0	0	0	0	0	0	0	0	0	0	0	0	0	0	0	0	0	0	0	0	0	1.99251e-08	4.24006e-08	9.00082e-08	1.90643e-07	4.02965e-07	8.50137e-07	1.79039e-06	3.76441e-06	7.90287e-06	1.65675e-05	3.46856e-05	7.95456e-05	0.000179875	0.000402189	0.000890998	0.00195871	0.0041194	0.00864968	0.0181351	0.0379695	0.0793932	0.20587
604	0	0	0	0	0	0	0	0	0	0	0	0	0	0	0	0	0	0	0	0	0	0	0	0	0	0	0	0.000482281	0.000966857	0.00193798	0.00388384	0.00778222	0.0155911	0.0312306	0.0625487	0.125254	0.250786	0.502055	1.00494	1.25704	1.84885	2.67123	3.85892	5.61004	8.01568	11.9809	19.9505	30.0425	53.424
608	0	0	0.00328609	0.0114512	0.0354316	0.102659	0.285184	0.769193	2.02936	5.26211	13.4532	15.8775	18.5306	21.4305	24.5963	28.0486	31.8094	35.9021	40.3519	47.9326	56.0496	62.7345	69.757	77.1117	84.7932	92.7959	31.2973	37.4248	37.4964	37.5616	37.6205	37.6734	37.7203	37.7613	37.7966	37.8263	37.8506	37.8694	37.883	37.8915	44.5636	51.4845	59.4727	69.1362	78.9889	94.4069	125.705	151.364	729.616
612	0	0	0	0	0	0	0	0	0	0	0	0	0	0	0	0	0	0	0	0	0	0	0	0	0	0	0	0	0	0	0	0	0	0	0	0	0	0	0	0	0	0	0	0	0	0	0	0	0
616	0	0	0	0	0	0	0	0	0	0	0	0	0	0	0	0	0	0	0	0	0	0	0	0	0	0	0	0	0	0	0	0	0	0	0	0	0	0	0	0	0	0	0	0	0	0	0	0	0
620	0	0	2.44759e-17	1.10142e-16	4.40566e-16	1.65212e-15	5.94765e-15	2.08168e-14	7.13718e-14	2.4088e-13	8.02932e-13	1.99421e-12	4.40826e-12	9.65618e-12	2.09917e-11	4.08079e-11	7.79212e-11	1.6659e-10	3.54676e-10	9.40428e-10	2.386e-09	6.28743e-09	1.58637e-08	4.62153e-08	6.96454e-08	2.12627e-07	7.07157e-07	1.51552e-06	3.99633e-06	8.3651e-06	1.73106e-05	3.58158e-05	7.40903e-05	0.000153452	0.000317751	0.000657818	0.00136155	0.00281754	0.00581649	0.0120092	0.0256045	0.0546909	0.113562	0.246892	0.540865	1.18655	2.63969	5.7178	12.4917
624	0	0	8.57066e-08	2.8926e-07	8.67779e-07	2.44063e-06	6.5897e-06	1.7298e-05	4.44805e-05	0.000112591	0.000281478	0.000539302	0.00102184	0.00191855	0.00357494	0.00661874	0.0121869	0.0223326	0.0407545	0.074099	0.134286	0.242647	0.437298	0.786223	1.4105	2.52547	4.5136	8.05342	8.28818	8.5338	8.79137	9.06214	9.34758	9.64939	9.96958	10.3106	10.6752	11.067	11.4902	11.9501	12.4536	13.0092	13.6285	14.3267	15.1252	16.0548	17.1619	18.5203	20.1315
626	0	0	2.87535e-08	8.08691e-08	2.02173e-07	4.73843e-07	1.06615e-06	2.33219e-06	4.99756e-06	1.05417e-05	2.19619e-05	4.60231e-05	9.53769e-05	0.000195863	0.000399178	0.000808335	0.0016279	0.00326281	0.00651247	0.0129509	0.0256706	0.0507341	0.100005	0.196656	0.38588	0.755681	1.4772	2.88279	2.95004	3.01765	3.08557	3.1537	3.22198	3.2903	3.35856	3.42665	3.49444	3.56179	3.62856	3.94281	4.28184	4.64722	5.04056	5.46349	5.68094	5.90246	6.12752	6.35541	6.54413
630	0	0	0	0	0	0	0	0	0	0	0	0	0	0	0	0	0	0	0	0	0	0	0	0	0	0	0.000948268	0.00148046	0.00195481	0.00258069	0.00340638	0.00449553	0.00593196	0.00782614	0.0103236	0.013616	0.0179558	0.0236755	0.0312129	0.0411442	0.0502474	0.0595467	0.0756557	0.0932973	0.113112	0.133717	0.154459	0.177792	0.220023
634	0	0	0	0	0	0	0	0	0	0	0	0	0	0	0	0	0	0	0	0	0	0	0	0	0	0	0	0	0	0	0	0	0	0	0	0	0	0	0	0	0	0	0	0	0	0	0	0	0
638	0	0	0	0	0	0	0	0	0	0	0	0	0	0	0	0	0	0	0	0	0	0	0	0	0	0	0	0	0	0	0	0	0	0	0	0	0	0	0	0	0	0	0	0	0	0	0	0	0
642	0	0	0	0	0	0	0	0	0	0	0	0	0	0	0	0	0	0	0	0	0.250672	0.297249	0.347214	0.546228	0.476361	0.796053	0.829927	1.07975	1.3091	1.42107	1.54234	1.6737	1.81595	1.96998	2.13675	2.31729	2.51273	2.72426	2.95319	3.20092	3.59118	3.85899	4.14625	4.50124	4.86302	5.23561	5.61507	6.01782	6.51892
643	0	0	3.94082e-06	1.03447e-05	2.41377e-05	5.28017e-05	0.000110885	0.000226396	0.00045281	0.00089153	0.00173374	0.0032706	0.00602724	0.0109002	0.0194144	0.0315467	0.0511323	0.089723	0.157191	0.267939	0.4532	0.716546	1.12994	1.22644	1.28348	1.72706	2.25069	2.65489	3.04752	3.44955	3.86097	4.2818	4.71203	5.15166	5.60069	6.05912	6.52695	7.00418	7.49082	8.08673	8.74641	10.4784	11.4868	13.3424	14.6301	17.0269	19.7824	22.4578	28.0651
646	0	0	0	0	0	0	0	0	0	0	0	0	0	0	0	0	0	0	0	0	0	0	0	0	0	0	0	0	0	0	0	0	0	0	0	0	0	0	0	0	0	0	0	0	0	0	0	0	0
654	0	0	0	0	0	0	0	0	0	0	0	0	0	0	0	0	0	0	0	0	0	0	0	0	0	0	0	0	0	0	0	0	0	0	0	0	0	0	0	0	0	0	0	0	0	0	0	0	0
659	0	0	0	0	0	0	0	0	0	0	0	0	0	0	0	0	0	0	0	0	0	0	0	0	0	0	0	0	0	0	0	0	0	0	0	0	0	0	0	0	0	0	0	0	0	0	0	0	0
660	0	0	0	0	0	0	0	0	0	0	0	0	0	0	0	0	0	0	0	0	0	0	0	0	0	0	0	0	0	0	0	0	0	0	0	0	0	0	0	0	0	0	0	0	0	0	0	0	0
662	0	0	0	0	0	0	0	0	0	0	0	0	0	0	0	0	0	0	0	0	0	0	0	0	0	0	0	0	0	0	0	0	0	0	0	0	0	0	0	0	0	0	0	0	0	0	0	0	0
666	0	0	0	0	0	0	0	0	0	0	0	0	0	0	0	0	0	0	0	0	0	0	0	0	0	0	0	0	0	0	0	0	0	0	0	0	0	0	0	0	0	0	0	0	0	0	0	0	0
670	0	0	0	0	0	0	0	0	0	0	0	0	0	0	0	0	0	0	0	0	0	0	0	0	0	0	0	0	0	0	0	0	0	0	0	0	0	0	0	0	0	0	0	0	0	0	0	0	0
674	0	0	0	0	0	0	0	0	0	0	0	0	0	0	0	0	0	0	0	0	0	0	0	0	0	0	0	0	0	0	0	0	0	0	0	0	0	0	0	0	0	0	0	0	0	0	0	0	0
678	0	0	0	0	0	0	0	0	0	0	0	0	0	0	0	0	0	0	0	0	0	0	0	0	0	0	0	0	0	0	0	0	0	0	0	0	0	0	0	0	0	0	0	0	0	0	0	0	0
682	0	0	0	0	0	0	0	0	0	0	0	0	0	0	0	0	0	0	0	0	0	0	0	0	0	0	0	0	0	0	0	0	0	0	0	0	0	0	0	0	0	0	0	0	0	0	0	0	0
686	0	0	0	0	0	0	0	0	0.00525516	0.00788274	0.0116781	0.016315	0.0225405	0.030859	0.041928	0.0566028	0.0759946	0.101544	0.13512	0.179136	0.236715	0.311888	0.409853	0.805962	1.58147	3.09704	6.05405	11.8147	12.0787	12.3527	12.6379	12.9355	13.2469	13.574	13.9186	14.2833	14.671	15.0853	15.5305	16.0121	16.537	17.1142	17.7555	18.4767	19.2999	20.2568	21.3951	23.4647	29.2299
690	0	0	0	0	0	0	0	0	0	0	0	0	0	0	0	0	0	0	0	0	0	0	0	0	0	0	0	0	0	0	0	0	0	0	0	0	0	0	0	0	0	0	0	0	0	0	0	0	0
694	0	0	3.22478e-08	9.67434e-08	2.57982e-07	6.44956e-07	1.54789e-06	3.61175e-06	8.25544e-06	1.85747e-05	4.12772e-05	7.68889e-05	0.000141637	0.000258544	0.000468378	0.00084308	0.00150922	0.00268883	0.00477051	0.00843272	0.0148577	0.0261013	0.045733	0.0799398	0.13943	0.242711	0.421733	0.731577	0.823885	0.92768	1.04437	1.17555	1.323	1.48871	1.67491	1.88413	2.11917	2.38319	2.67973	3.01277	3.38675	3.80666	4.27809	4.80731	7.56189	11.8934	18.7039	29.411	45.9532
702	0	0	0	0	0	0	0	0	0	0	0	0	0	0	0	0	0	0	0	0	0	0	0	0	0	0	0	0	0	0	0	0	0	0	0	0	0	0	0	0	0	0	0	0	0	0	0	0	0
703	0	0	0	0	0	0	0	0	0	0	0	0	0	0	0	0	0	0	0	0	0	0	0	0	0	0	0	0	0	0	0	0	0	0	0	0	0	0	0	0	0	0	0	0	0	0	0	0	0
704	0	0	0.000494642	0.00191948	0.00661595	0.0213613	0.0661559	0.199018	0.585939	1.69644	4.84578	5.80286	6.87184	8.06376	9.39067	10.8657	12.5032	14.3187	16.3292	18.195	20.1513	27.4816	35.3883	43.8622	52.8939	62.4742	81.0197	100.697	112.05	123.656	135.515	147.627	159.991	172.606	185.473	198.592	211.961	225.58	239.449	253.568	287.481	322.068	357.327	393.258	429.859	525.146	622.29	721.29	817.002
705	0	0	0	0	0	0	0	0	0	0	0	0	0	0	0	0	0	0	0	0	0	0	0	0	0	0	0	0	0	0	0	0	0	0	0	0	0	0	0	0	0	0	0	0	0	0	0	0	0
706	0	0	0	0	0	0	0	0	0	0	0	0	0	0	0	0	0	0	0	0	0	0	0	0	0	0	0	0	0	0	0	0	0	0	0	0	0	0	0	0	0	0	0	0	0	0	0	0	0
710	0	0	0	0	0	0	0	0	0	0	0	0	0	0	0	0	0	0	0	0	0	0	0	0	0	0	0	0	0	0	0	0	0	0	0	0	0	0	0	0	0	0	0	0	0	0	0	0	0
716	0	0	6.99057e-08	2.35932e-07	7.07795e-07	1.99067e-06	5.37482e-06	1.41089e-05	3.628e-05	9.18338e-05	0.000229585	0.000439876	0.00083345	0.00156484	0.00291586	0.0053985	0.0099401	0.0182154	0.0332409	0.0621736	0.113321	0.17917	0.282538	0.44448	0.69773	2.18622	3.70948	6.24504	6.35291	6.47084	6.59151	6.71518	6.84217	6.97283	7.10758	7.24694	7.39149	7.54197	7.69928	7.86451	8.03909	8.22481	8.42408	8.64014	8.87751	9.14278	9.44604	9.80366	10.1807
724	0	0	0	0	0	0	0	0	0	0	0	0	0	0	0	0	0	0	0	0	4.42367	5.24563	6.74012	9.63941	7.39769	9.13129	12.449	12.195	13.945	14.5209	15.1181	15.7373	16.3792	17.0446	17.7343	18.4492	19.1901	19.958	20.7537	21.5782	23.3251	23.5524	26.0046	28.9754	30.8656	32.8679	34.759	35.9026	36.252
732	0	0	0	0	0	0	0	0	0	0	0	0	0	0	0	0	0	0	0	0	0	0	0	0	0	0	0	0	0	0	0	0	0	0	0	0	0	0	0	0	0	0	0	0	0	0	0	0	0
736	0	0	0	0	0	0	0	0	0	0	0	0	0	0	0	0	0	0	0	0	0	0	0	0	0	0	0	0	0	0	0	0	0	0	0	0	0	0	0	0	0	0	0	0	0	0	0	0	0
740	0	0	0	0	0	0	0	0	0	0	0	0	0	0	0	0	0	0	0	0	0	0	0	0	0	0	0	2.74057e-07	6.05915e-07	1.33939e-06	2.96026e-06	6.54155e-06	1.44531e-05	3.19283e-05	7.05218e-05	0.000155742	0.000343895	0.000759249	0.00167603	0.00363326	0.00787504	0.0170669	0.0369827	0.0801293	0.180022	0.404397	0.908323	2.03997	4.55235
744	0	0	0	0	0	0	0	0	0	0	0	0	0	0	0	0	0	0	0	0	0	0	0	0	0	0	0	0	0	0	0	0	0	0	0	0	0	0	0	0	0	0	0	0	0	0	0	0	0
748	0	0	8.31655e-09	2.80684e-08	8.42051e-08	2.36827e-07	6.39432e-07	1.67851e-06	4.31617e-06	1.09253e-05	2.73132e-05	4.5943e-05	7.64234e-05	0.000125973	0.000206077	0.000334961	0.000541465	0.000871115	0.00139563	0.00244234	0.00422494	0.00801597	0.0147473	0.0265143	0.046824	0.0815085	0.14871	0.33167	0.386354	0.419127	0.454381	0.492254	0.532882	0.576394	0.62291	0.672531	0.725337	0.781375	0.840645	0.903086	0.968554	1.03679	1.10738	1.17971	1.25286	1.32553	1.3958	1.46093	1.50731
752	0	0	0	0	0	0	0	0	0	0	0	0	0	0	0	0	0	0	0	0	0	0	0	0	0	0	0	0	0	0	0	0	0	0	0	0	0	0	0	0	0	0	0	0	0	0	0	0	0
756	0	0	0	0	0	0	0	0	0	0	0	0	0	0	0	0	0	0	0	0	0	0	0	0	0	0	0	0	0	0	0	0	0	0	0	0	0	0	0	0	0	0	0	0	0	0	0	0	0
760	0	0	0	0	0	0	0	0	0	0	0	0	0	0	0	0	0	0	0	0	0	0	0	0	0	0	0	0	0	0	0	0	0	0	0	0	0	0	0	0	0	0	0	0	0	0	0	0	0
762	0	0	1.39148e-06	3.65262e-06	8.52279e-06	1.86436e-05	3.91516e-05	7.99344e-05	0.000159869	0.000314742	0.000611998	0.00109928	0.00195267	0.0034371	0.00600425	0.0104217	0.0179898	0.0309061	0.0528751	0.0883254	0.146728	0.242534	0.415715	0.70631	1.19087	1.99437	3.52129	6.1258	6.57285	6.93446	7.3105	7.70083	8.10514	8.52291	8.95341	9.3956	9.84809	10.3091	10.7761	11.2462	11.7153	12.1785	12.6292	13.0592	13.4573	13.8091	14.0952	14.2881	14.259
764	0	0	0.00090756	0.00296494	0.0086006	0.0233617	0.148726	0.547009	1.67034	4.61991	18.4552	22.663	27.293	32.3431	37.8109	43.694	49.9898	56.6959	63.8093	71.3274	79.2471	100.075	122.537	146.623	172.321	199.618	233.696	269.751	275.463	284.202	293.168	302.367	311.804	321.486	331.418	341.605	352.055	362.772	391.433	420.651	450.426	480.758	511.646	594.813	679.652	766.161	854.34	944.187	962.212
768	0	0	1.79132e-06	5.37395e-06	1.43305e-05	3.58264e-05	8.59833e-05	0.000200628	0.000458577	0.0010318	0.00229289	0.00439309	0.00832376	0.0156283	0.029121	0.0539155	0.0992729	0.181919	0.331981	0.603602	1.09387	1.31772	1.58319	1.89762	2.26958	2.70909	3.22785	3.83954	3.90375	3.96834	4.03332	4.0987	4.16446	4.23062	4.29717	4.36412	4.43147	4.49923	4.56738	4.65932	4.75248	4.84688	4.94252	5.03943	5.19879	5.36255	5.53083	5.70374	5.84465
772	0	0	0	0	0	0	0	0	0	0	0	0	0	0	0	0	0	0	0	0	0	0	0	0	0	0	0	0	0	0	0	0	0	0	0	0	0	0	0	0	0	0	0	0	0	0	0	0	0
776	0	0	0	0	0	0	0	0	0	0	0	0	0	0	0	0	0	0	0	0	0	0	0	0	0	0	0	0	0	0	0	0	0	0	0	0	0	0	0	0	0	0	0	0	0	0	0	0	0
780	0	0	0	0	0	0	0	0	0	0	0	0	0	0	0	0	0	0	0	0	0	0	0	0	0	0	0.000897303	0.00186785	0.00283914	0.00431474	0.00655617	0.00996034	0.0151296	0.0229781	0.0348927	0.0529773	0.0804234	0.122071	0.185261	0.281123	0.299567	0.340842	0.387756	0.499882	0.614377	0.85906	1.08537	1.37115	1.7006
784	0	0	0	0	0	0	0	0	0	0	0	0	0	0	0	0	0	0	0	0	0	0	0	0	0	0	0	0	0	0	0	0	0	0	0	0	0	0	0	0	0	0	0	0	0	0	0	0	0
788	0	0	0	0	0	0	0	0	0	0	0	0	0	0	0	0	0	0	0	0	0	0	0	0	0	0	0	0	0	0	0	0	0	0	0	0	0	0	0	0	0	0	0	0	0	0	0	0	0
792	0	0	1.86207e-06	6.28449e-06	1.88535e-05	0.000111942	0.000339362	0.000835149	0.00286337	0.0072479	0.0161065	0.0292522	0.0522275	0.0796736	0.11991	0.178067	0.260805	0.460005	0.8013	1.40759	2.4426	2.82322	5.24999	9.51452	8.02096	9.02743	12.0468	13.3222	13.6575	14.0378	14.4262	14.8229	15.228	15.6419	16.0645	16.496	16.9367	17.3867	17.8462	18.3154	19.2259	20.1149	21.0423	22.0098	23.019	23.7793	24.5255	25.2923	25.9171
795	0	0	9.43355e-06	2.47631e-05	5.77805e-05	0.000126395	0.000265429	0.000541918	0.00108384	0.0021338	0.00414906	0.00745262	0.0132382	0.0233019	0.040706	0.070654	0.121962	0.209529	0.358468	0.588112	0.960837	1.08426	1.21502	1.35312	1.51229	1.72309	2.09582	2.41508	2.61168	2.79304	2.9865	3.19283	3.41287	3.64751	3.89768	4.16439	4.44871	4.75176	5.07476	5.41898	5.78578	6.17661	6.59301	7.03661	7.50916	8.01249	8.54857	9.11948	9.66665
796	0	0	0	0	0	0	0	0	0	0	0	0	0	0	0	0	0	0	0	0	0	0	0	0	0	0	0	0	0	0	0	0	0	0	0	0	0	0	0	0	0	0	0	0	0	0	0	0	0
798	0	0	0	0	0	0	0	0	0	0	0	0	0	0	0	0	0	0	0	0	0	0	0	0	0	0	0	0	0	0	0	0	0	0	0	0	0	0	0	0	0	0	0	0	0	0	0	0	0
800	0	0	0	0	0	0	0	0	0	0	0	0	0	0	0	0	0	0	0	0	0	0	0	0	0	0	0	0	0	0	0	0	0	0	0	0	0	0	0	0	0	0	0	0	0	0	0	0	0
804	0	0	0	0	0	0	0	0	0	0	0	0	0	0	0	0	0	0	0	0	0	0	0	0	0	0	0	0	0	0	0	0	0	0	0	0	0	0	0	0	0	0	0	0	0	0	0	0	0
807	0	0	0	0	0	0	0	0	0	0	0	0	0	0	0	0	0	0	0	0	0	0	0	0	0	0	0	0	0	0	0	0	0	0	0	0	0	0	0	0	0	0	0	0	0	0	0	0	0
818	0	0	0	0	0	0	0	0	1.084	2.43901	8.13004	9.768	11.5494	11.8244	11.9559	11.2984	10.4017	12.6016	14.9927	18.4121	22.1185	20.2832	19.6077	24.1629	21.7897	22.4772	29.292	27.4389	27.1868	26.9186	26.634	26.3332	26.0161	25.6828	25.3332	24.9673	24.5852	24.1869	27.2681	30.4145	33.6258	36.9022	40.2437	36.2394	41.8716	48.3734	67.962	47.5	115.434
826	0	0	0	0	0	0	0	0	0	0	0	0	0	0	0	0	0	0	0	0	0	0	0	0	0	0	0	0	0	0	0	0	0	0	0	0	0	0	0	0	0	0	0	0	0	0	0	0	0
834	0	0	3.67904e-06	1.08755e-05	2.87948e-05	7.20559e-05	0.000174582	0.000414894	0.000974668	0.00227466	0.00529136	0.010549	0.0207981	0.0406342	0.0787902	0.151801	0.290871	0.554711	1.0535	1.95536	3.54359	5.95287	8.58961	11.4538	14.5455	9.84662	12.4654	15.2638	15.6756	16.0653	16.4701	16.8917	17.3316	17.792	18.2752	18.784	19.3218	19.8925	20.501	21.1534	21.8572	22.6221	23.4607	24.3896	25.4319	26.6201	28.0024	29.6545	31.5059
840	0	0	0	0	0	0	0	0	0	0	0	0	0	0	0	0	0	0	0	0	0	0	0	0	0	0	0	2.28831e-06	6.86731e-06	1.84334e-05	4.6499e-05	0.000112732	0.00026587	0.00061443	0.001398	0.00314178	0.00699014	0.0180854	0.0473888	0.124296	0.328319	0.864519	2.30908	6.25883	15.4626	40.5833	102.389	138.7	257.58
850	0	0	0	0	0	0	0	0	0	0	0	0	0	0	0	0	0	0	0	0	0	0	0	0	0	0	0	0	0	0	0	0	0	0	0	0	0	0	0	0	0	0	0	0	0	0	0	0	0
854	0	0	3.04101e-06	1.02634e-05	3.07903e-05	8.65976e-05	0.000233814	0.000613761	0.00157824	0.00399492	0.00998731	0.0189759	0.0356547	0.0663856	0.122669	0.22522	0.411236	0.747315	1.3524	2.43842	4.38218	5.23493	6.23718	7.41362	8.7929	10.4082	12.2979	14.5065	14.7491	15.0814	15.4248	15.7804	16.1493	16.533	16.9332	17.3518	17.7911	18.2539	18.7435	19.2642	19.8211	20.4207	21.0715	21.7849	22.5762	23.4669	24.4889	25.6915	26.9871
858	0	0	0	0	0	0	0	0	0	0	0	0	0	0	0	0	0	0	0	0	0	0	0	0	0	0	0	4.49783e-09	9.59538e-09	2.04666e-08	4.36471e-08	9.30668e-08	1.9841e-07	4.22927e-07	9.01365e-07	1.92075e-06	4.09241e-06	8.71816e-06	1.857e-05	3.95492e-05	0.00010801	0.000291301	0.00078553	0.00285812	0.00834618	0.0228264	0.068221	0.183925	0.420948
860	0	0	1.71556e-05	4.50334e-05	0.000105078	0.000229858	0.000482702	0.000985516	0.00197103	0.00388047	0.00754535	0.0135531	0.0240746	0.0423762	0.0740267	0.128489	0.221797	0.381043	0.651899	1.08085	1.78326	2.02585	2.28343	2.55601	2.84358	3.17132	3.77859	4.42442	4.77366	5.10517	5.45877	5.83591	6.2381	6.66697	7.12424	7.61174	8.13141	8.68534	9.27572	9.90488	10.5753	11.2897	12.0508	12.8616	13.7253	14.6453	15.6252	16.6687	17.6688
862	0	0	0	0	0	0	0	0	0	0	0	0	0	0	0	0	0	0	0	0	0	0	0	0	0	0	0	8.62287e-08	1.76969e-07	3.63134e-07	7.45013e-07	1.52823e-06	3.13433e-06	6.42737e-06	1.31782e-05	2.70154e-05	5.5374e-05	0.000113485	0.000232547	0.000577435	0.00143363	0.0035589	0.00883363	0.0219235	0.0498699	0.113427	0.260446	0.538563	1.0953
876	0	0	0	0	0	0	0	0	0	0	0	0	0	0	0	0	0	0	0	0	0	0	0	0	0	0	0	0	0	0	0	0	0	0	0	0	0	0	0	0	0	0	0	0	0	0	0	0	0
882	0	0	0	0	0	0	0	0	0	0	0	0	0	0	0	0	0	0	0	0	0	0	0	0	0	0	0	0	0	0	0	0	0	0	0	0	0	0	0	0	0	0	0	0	0	0	0	0	0
887	0	0	0	0	0	0	0	0	0	0	0	0	0	0	0	0	0	0	0	0	0	0	0	0	0	0	0	0	0	0	0	0	0	0	0	0	0	0	0	0	0	0	0	0	0	0	0	0	0
891	0	0	0	0	0	0	0	0	0	0	0	0	0	0	0	0	0	0	0	0	0	0	0	0	0	0	0	0	0	0	0	0	0	0	0	0	0	0	0	0	0	0	0	0	0	0	0	0	0
894	0	0	0	0	0	0	0	0	0	0	0	0	0	0	0	0	0	0	0	0	0	0	0	0	0	0	0	0	0	0	0	0	0	0	0	0	0	0	0	0	0	0	0	0	0	0	0	0	0
[truncated: 108 more columns]

## Sheet: upper
ISO1	y-10000	y-9000	y-8000	y-7000	y-6000	y-5000	y-4000	y-3000	y-2000	y-1000	y0	y100	y200	y300	y400	y500	y600	y700	y800	y900	y1000	y1100	y1200	y1300	y1400	y1500	y1600	y1700	y1710	y1720	y1730	y1740	y1750	y1760	y1770	y1780	y1790	y1800	y1810	y1820	y1830	y1840	y1850	y1860	y1870	y1880	y1890	y1900	y1910
4	0	0	5.85852e-05	0.000120117	0.000246234	0.00050468	0.00304995	0.00792095	0.0167604	0.032249	0.0953845	0.158256	0.259251	0.382114	0.563026	0.829323	1.22116	1.74358	2.4862	3.57908	5.14791	7.9862	12.3498	12.6943	19.9628	31.2385	57.2559	83.9095	84.7818	85.4875	86.1837	86.8694	87.544	88.2065	88.856	89.4916	90.1122	90.7169	91.3044	91.8738	93.368	96.9169	100.574	104.339	108.215	113.87	121.132	128.816	137.729
8	0	0	0	0	0	0	0	0	0	0	0	0	0	0	0	0	0	0	0	0	0.536408	0.525572	0.514735	0.503899	0.493062	0.482226	0.471389	0.690829	0.711382	0.731514	0.751226	0.770517	0.789387	0.807837	0.825866	0.843475	0.860662	0.87743	0.893776	0.909702	0.917105	0.964003	1.01322	1.10742	1.19972	1.30984	1.41769	1.54746	1.68416
12	0	0	0	0	0	0	0	0	0	0	0	0	0	0	0	0	0	0	0	0	0	0	0	0	0	0	0	0	0	0	0	0	0	0	0	0	0	0	0	0	0	0	0	0	0	0	0	0	0
16	0	0	0	0	0	0	0	0	0	0	0	0	0	0	0	0	0	0	0	0	0	0	0	0	0	0	0	0	0	0	0	0	0	0	0	0	0	0	0	0	0	0	0	0	0	0	0	0	0
20	0	0	0	0	0	0	0	0	0	0	0	0	0	0	0	0	0	0	0	0	0	0	0	0	0	0	0	0	0	0	0	0	0	0	0	0	0	0	0	0	0	0	0	0	0	0	0	0	0
24	0	0	6.94498e-06	1.71398e-05	4.22931e-05	0.000104342	0.000257376	0.000634745	0.00156512	0.00385846	0.0095103	0.0187009	0.0367625	0.0722463	0.141935	0.278756	0.547282	1.0741	2.10729	4.02943	7.29163	8.33505	9.32936	10.2746	11.7292	13.1102	13.6166	14.0861	6.63671	6.67497	6.71708	6.76347	6.81467	6.87125	6.93394	7.00358	7.08118	7.16797	7.26548	7.3756	7.50074	7.64397	7.80939	8.00248	8.23086	8.5055	8.84289	9.26928	9.88647
28	0	0	0	0	0	0	0	0	0	0	0	0	0	0	0	0	0	0	0	0	0	0	0	0	0	0	0	0	0	0	0	0	0	0	0	0	0	0	0	0	0	0	0	0	0	0	0	0	0
31	0	0	0	0	0	0	0	0	0	0	0.000790814	0.00124959	0.00197394	0.00311723	0.00492117	0.00776652	0.0122529	0.019324	0.0304649	0.0473592	0.0733799	0.107846	0.14083	0.172332	0.134901	0.16492	0.193456	0.22051	0.142517	0.153149	0.164562	0.176814	0.189966	0.204081	0.21923	0.235487	0.25293	0.271646	0.291724	0.313262	0.336364	0.36114	0.387711	0.416202	0.446749	0.479496	0.5146	0.552224	0.595963
32	0	0	0	0	0	0	0	0	0	0	0	0	0	0	0	0	0	0	0	0	0	0	0	0	0	0	0	0.000203599	0.00040394	0.000801365	0.0015897	0.00315334	0.00625456	0.0124049	0.0246013	0.0487856	0.0967372	0.191806	0.528589	0.669495	0.847895	1.07375	1.35965	1.72154	2.27433	3.2347	4.17673	5.82493	8.368
36	0	0	0	0	0	0	0	0	0	0	0	0	0	0	0	0	0	0	0	0	0	0	0	0	0	0	0	0	0	0	0	0	0	0	0	0	0	0.240899	0.218729	0.20607	0.221921	0.282711	0.520611	1.09171	1.60882	2.06901	2.83095	3.35457	3.95261
40	0	0	0	0	0	0	0	0	0	0	0	0	0	0	0	0	0	0	0	0	0	0	0	0	0	0	0	0	0	0	0	0	0	0	0	0	0	0	0	0	0	0	0	0	0	0	0	0	0
44	0	0	0	0	0	0	0	0	0	0	0	0	0	0	0	0	0	0	0	0	0	0	0	0	0	0	0	0	0	0	0	0	0	0	0	0	0	0	0	0	0	0	0	0	0	0	0	0	0
48	0	0	0	0	0	0	0	0	0	0	0	0	0	0	0	0	0	0	0	0	0	0	0	0	0	0	0	0	0	0	0	0	0	0	0	0	0	0	0	0	0	0	0	0	0	0	0	0	0
50	0	0	0	4.0106	6.30267	9.88128	15.4517	24.0937	37.4507	58.0085	89.4984	93.85	97.9187	102.934	107.616	111.969	116	125.254	133.91	146.184	157.655	159.372	160.805	156.309	171.987	177.664	224.146	267.573	272.291	275.406	278.537	281.685	284.849	288.029	291.223	294.432	297.654	300.888	380.168	486.925	623.613	798.606	1022.62	1309.36	1690.94	2183.54	2933.61	3233.16	3293.03
51	0	0	0	0	0	0	0	0	0	0	0	0	0	0	0	0	0	0	0	0	0	0	0	0	0	0	0	0	0	0	0	0	0	0	0	0	0	0	0	0	0	0	0	0	0	0	0	0	0
52	0	0	0	0	0	0	0	0	0	0	0	0	0	0	0	0	0	0	0	0	0	0	0	0	0	0	0	0	0	0	0	0	0	0	0	0	0	0	0	0	0	0	0	0	0	0	0	0	0
56	0	0	0	0	0	0	0	0	0	0	0	0	0	0	0	0	0	0	0	0	0	0	0	0	0	0	0	0	0	0	0	0	0	0	0	0	0	0	0	0	0	0	0	0	0	0	0	0	0
60	0	0	0	0	0	0	0	0	0	0	0	0	0	0	0	0	0	0	0	0	0	0	0	0	0	0	0	0	0	0	0	0	0	0	0	0	0	0	0	0	0	0	0	0	0	0	0	0	0
64	0	0	0.00115989	0.00214692	0.00264879	0.00326743	0.00402983	0.00496921	0.00612643	0.00755167	0.00930664	0.0137253	0.0202361	0.0298262	0.0439475	0.0647334	0.0953185	0.140305	0.206449	0.20244	0.198432	0.194423	0.190414	0.205046	0.218876	0.267582	0.348759	0.425927	0.461496	0.466252	0.471025	0.475815	0.480622	0.485443	0.490278	0.495125	0.499984	0.504853	0.637163	0.858117	1.1556	1.55609	2.09521	2.82087	3.88193	5.34165	7.34962	8.34747	8.80892
68	0	0	0	0	0	0	0	0	0	0	0	0	0	0	0	0	0	0	0	0	0	0	0	0	0	0	0	0.00346201	0.00699946	0.0141505	0.0286057	0.0578232	0.116875	0.236218	0.477388	0.964718	1.94938	3.93877	7.95779	9.36514	11.0205	11.061	11.0989	13.1308	11.1863	9.27558	14.9886	12.9798	14.8953
70	0	0	0	0	0	0	0	0	0	0	0	0	0	0	0	0	0	0	0	0	0	0	0	0	0	0	0	0	0	0	0	0	0	0	0	0	0	0	0	0	0	0	0	0	0	0	0	0	0
72	0	0	0	0	0	0	0	0	0	0	0	0	0	0	0	0	0	0	0	0	0	0	0	0	0	0	0	0	0	0	0	0	0	0	0	0	0	0	0	0	0	0	0	0	0	0	0	0	0
76	0	0	0	0	0	0	0	0	0	0	0	0	0	0	0	0	0	0	0	0	0	0	0	0	0	0	0	4.77357e-06	1.0895e-05	2.49934e-05	5.76349e-05	0.000133608	0.000311368	0.000729433	0.00171763	0.00406483	0.00966608	0.0230919	0.0586221	0.142725	0.359286	0.864504	2.01767	4.60697	10.3491	22.813	56.1464	134.778	338.491
84	0	0	0	0	0	0	0	0	0	0	0	0	0	0	0	0	0	0	0	0	0	0	0	0	0	0	0	4.05491e-09	8.70436e-09	1.86838e-08	4.01018e-08	8.60663e-08	1.84703e-07	3.96354e-07	8.50476e-07	1.82478e-06	3.91495e-06	8.39866e-06	1.80161e-05	3.69067e-05	7.55989e-05	0.000154843	0.000317125	0.000649434	0.00144782	0.00322743	0.00719386	0.0160335	0.0359379
86	0	0	0	0	0	0	0	0	0	0	0	0	0	0	0	0	0	0	0	0	0	0	0	0	0	0	0	0	0	0	0	0	0	0	0	0	0	0	0	0	0	0	0	0	0	0	0	0	0
90	0	0	8.97274e-10	1.66082e-09	3.07359e-09	5.68716e-09	1.05212e-08	1.94608e-08	3.59891e-08	6.65423e-08	1.2301e-07	2.7212e-07	6.01803e-07	1.33051e-06	2.94066e-06	6.49727e-06	1.43506e-05	3.16854e-05	6.99341e-05	0.000154296	0.000340292	0.00075019	0.00165312	0.00364122	0.00801657	0.0176409	0.0388	0.085293	0.10439	0.127686	0.15608	0.190655	0.232713	0.283814	0.345823	0.420961	0.51186	0.621622	0.753879	0.770851	0.786801	0.801431	0.814373	0.825172	0.816613	0.804737	0.788816	0.767849	0.744664
92	0	0	0	0	0	0	0	0	0	0	0	0	0	0	0	0	0	0	0	0	0	0	0	0	0	0	0	0	0	0	0	0	0	0	0	0	0	0	0	0	0	0	0	0	0	0	0	0	0
96	0	0	3.72322e-08	6.89153e-08	1.27538e-07	2.35987e-07	4.36577e-07	8.0752e-07	1.49336e-06	2.76116e-06	5.10425e-06	1.12915e-05	2.49717e-05	5.52092e-05	0.000122022	0.000269603	0.000595476	0.00131478	0.0029019	0.00426833	0.00627571	0.0110681	0.0270997	0.0437731	0.0700883	0.0856849	0.157049	0.276189	0.283699	0.306337	0.330754	0.35709	0.38549	0.416114	0.449133	0.484729	0.523101	0.56446	0.609034	0.634011	0.659951	0.686887	0.714852	0.743881	0.750318	0.756732	0.798816	0.83972	0.884522
100	0	0	0	0	0	0	0	0	0	0	0	0	0	0	0	0	0	0	0	0	1.53749	1.63825	1.71512	1.80539	0.97161	1.38219	2.11114	2.06261	2.11548	2.19835	2.28431	2.37347	2.46594	2.56184	2.66128	2.76438	2.87126	2.98206	3.09689	3.21601	3.28894	3.43113	3.57918	3.60851	3.63678	4.19991	4.77286	4.50701	5.24975
104	0	0	0	0.0111346	0.0177108	0.0281331	0.0446247	0.0706751	0.111749	1.77749	4.89358	5.26969	5.62606	5.96289	6.28041	6.57883	6.85835	7.1192	7.36158	7.5857	7.79178	9.50004	11.1145	10.4701	12.1324	13.6944	14.9907	16.1982	16.3824	16.5612	16.7346	16.9028	17.0656	17.223	17.3752	17.522	17.6635	17.7997	18.8125	19.8037	19.475	194.779	366.759	535.418	700.762	862.796	1211.72	2332.05	2702.61
108	0	0	2.16026e-08	4.26512e-08	8.41946e-08	1.66174e-07	3.27916e-07	6.46969e-07	1.27621e-06	2.51697e-06	4.96305e-06	1.06465e-05	2.28316e-05	4.89481e-05	0.000104906	0.000224761	0.00048139	0.00103067	0.00220591	0.00405576	0.00715581	0.0127955	0.0221451	0.0374339	0.062158	0.101772	0.16415	0.262435	0.264619	0.265655	0.266815	0.268111	0.269561	0.271184	0.273	0.275038	0.277328	0.279909	0.282829	0.286146	0.289935	0.29429	0.299336	0.30524	0.312235	0.320649	0.330976	0.343994	0.363108
112	0	0	0	0	0	0	0	0	0	0	0	0	0	0	0	0	0	0	0	0	0	0	0	0	0	0	0	0	0	0	0	0	0	0	0	0	0	0	0	0	0	0	0	0	0	0	0	0	0
116	0	0	0	0	2.24486	4.71162	9.91095	20.8967	44.168	93.5925	198.839	209.515	220.696	232.398	244.64	257.438	270.809	284.769	299.334	308.448	316.827	339.933	361.549	381.692	400.379	417.628	451.065	482.129	483.709	485.197	486.592	487.895	489.105	490.222	491.247	492.18	493.021	493.77	494.428	494.993	499.723	506.816	513.968	521.178	528.444	558.198	592.203	628.222	670.217
120	0	0	1.31898e-05	2.92965e-05	6.50611e-05	0.000144461	0.000320704	0.000711834	0.00157969	0.00350493	0.00777501	0.0131046	0.022081	0.0371948	0.062634	0.105438	0.177434	0.298487	0.501946	0.843771	1.41782	1.58763	1.77703	1.98813	2.22329	2.48506	2.77624	3.09991	3.05148	3.05616	3.06193	3.06892	3.07726	3.08712	3.09869	3.11219	3.12791	3.14617	3.16738	3.19204	3.22077	3.25439	3.29395	3.34084	3.397	3.46517	3.54941	3.65608	3.81777
124	0	0	0	0	0	0	0	0	0	0	0	0	0	0	0	0	0	0	0	0	0	0	0	0	0	0	0	0	0	0	0	0	0	0	0	0	0	0	0	0	0	0	0	0	0	0	0	0	0
132	0	0	0	0	0	0	0	0	0	0	0	0	0	0	0	0	0	0	0	0	0	0	0	0	0	0	0	0	0	0	0	0	0	0	0	0	0	0	0	0	0	0	0	0	0	0	0	0	0
136	0	0	0	0	0	0	0	0	0	0	0	0	0	0	0	0	0	0	0	0	0	0	0	0	0	0	0	0	0	0	0	0	0	0	0	0	0	0	0	0	0	0	0	0	0	0	0	0	0
140	0	0	1.56599e-05	3.47831e-05	7.72455e-05	0.000171516	0.000380765	0.000845143	0.00187552	0.00416132	0.00923109	0.0143304	0.0222402	0.0345054	0.053518	0.0829795	0.128616	0.199282	0.308663	0.477899	0.739635	0.762835	0.786428	0.810391	0.834698	0.859319	0.884219	0.909361	0.905103	0.91109	0.917647	0.924839	0.932741	0.941444	0.951052	0.961692	0.973515	0.986707	1.00149	1.01816	1.03707	1.05869	1.08364	1.11273	1.14713	1.18851	1.23937	1.30373	1.39652
144	0	0	0.0903288	0.161842	0.289605	0.517533	0.923523	1.64548	2.927	5.19742	9.2114	10.5205	11.7669	12.951	14.0737	15.1355	16.1372	17.0794	17.9628	18.788	19.5557	21.4588	23.246	21.9737	20.5205	21.4813	26.1274	30.4905	30.3981	29.548	28.7197	27.9128	27.1267	26.3609	25.6149	24.8883	24.1804	23.491	22.8195	22.1654	25.6861	31.806	39.3809	44.01	48.5429	47.6187	147.721	183.329	184.559
148	0	0	2.82226e-05	5.57215e-05	0.000109996	0.000217097	0.000428404	0.00084523	0.0016673	0.00328829	0.00648396	0.0109285	0.0184144	0.0310185	0.0522335	0.0879297	0.147971	0.248923	0.418597	0.649909	1.00585	1.58917	2.49749	4.01494	6.56637	10.3	17.6199	29.5112	29.8499	29.4602	29.0684	28.6743	28.2778	27.8786	27.4765	27.0713	26.6625	26.2499	25.8332	25.4118	24.9856	24.5539	24.1165	23.673	23.2232	22.7676	22.3075	21.8462	21.5157
152	0	0	0	0	0	0	0	0	0	0	0	0	0	0	0	0	0	0	0	0	0	0	0	0	0	0	0	1.75614e-07	3.57587e-07	7.28076e-07	1.48232e-06	3.01772e-06	6.14307e-06	1.25044e-05	2.54512e-05	5.17992e-05	0.000105416	0.000214515	0.000436491	0.000955934	0.00209337	0.00458385	0.0112369	0.0279925	0.0653786	0.150735	0.338541	0.753167	1.73259
156	0	0	1.20808	2.88601	6.88576	16.4068	39.0365	92.7371	219.95	312.448	1976.47	1716.2	1410.68	700.489	939.153	1140.64	1503.05	1219.32	935.608	1106.53	1002.83	2411.98	2689.05	2034.34	1766.46	2203.9	2305.39	2274.65	2360.26	2687.85	2833.4	3161.08	3908.62	4281.18	4740.6	5884.28	6319.03	6121.11	7102.22	7259.14	7919.11	8299.42	8587.77	8361.59	7026.96	7040.69	7190.51	7585.2	7987.46
158	0	0	0.0214763	0.0410442	0.0783423	0.149333	0.284247	0.540217	1.02501	1.94143	3.67019	3.78167	3.88562	3.98214	4.0713	4.15318	4.22788	4.29547	4.35605	4.40968	4.45646	5.39576	6.3417	7.2904	8.23806	9.18092	9.19574	45.9901	52.0196	54.4409	56.9706	59.6135	62.3741	65.2576	68.2691	71.4138	74.6974	78.1256	81.7043	85.4397	87.2383	89.6384	92.0964	94.4734	96.8043	99.2937	101.733	115.696	306.032
162	0	0	0	0	0	0	0	0	0	0	0	0	0	0	0	0	0	0	0	0	0	0	0	0	0	0	0	0	0	0	0	0	0	0	0	0	0	0	0	0	0	0	0	0	0	0	0	0	0
166	0	0	0	0	0	0	0	0	0	0	0	0	0	0	0	0	0	0	0	0	0	0	0	0	0	0	0	0	0	0	0	0	0	0	0	0	0	0	0	0	0	0	0	0	0	0	0	0	0
170	0	0	0	0	0	0	0	0	0	0	0	0	0	0	0	0	0	0	0	0	0	0	0	0	0	0	0	2.20728e-07	4.6858e-07	9.90417e-07	2.08537e-06	4.37586e-06	9.15405e-06	1.90969e-05	3.97399e-05	8.25085e-05	0.000170948	0.000353504	0.00066118	0.00123209	0.00290418	0.0069078	0.0164294	0.035138	0.07474	0.17834	0.413271	0.971606	2.36771
174	0	0	0	0	0	0	0	0	0	0	0	0	0	0	0	0	0	0	0	0.0124226	0.0365298	0.0644253	0.11042	0.185306	0.305978	0.498756	0.914153	1.60765	1.58481	1.68222	1.78549	1.89496	2.01099	2.13398	2.26431	2.40242	2.54875	2.70378	2.86802	3.04198	3.22622	3.42132	3.62792	3.84665	4.07821	4.32331	4.58272	4.85723	5.17739
175	0	0	0	0	0	0	0	0	0	0	0	0	0	0	0	0	0	0	0	0	0	0	0	0	0	0	0	0	0	0	0	0	0	0	0	0	0	0	0	0	0	0	0	0	0	0	0	0	0
178	0	0	5.62748e-06	1.11107e-05	2.19327e-05	4.32883e-05	8.54222e-05	0.000168536	0.000332454	0.000655673	0.00129288	0.00217911	0.00367176	0.00618498	0.0104152	0.0175329	0.0295048	0.0496343	0.0834667	0.140307	0.235764	0.396002	0.664863	1.11577	1.87162	3.13797	5.25849	8.80732	8.66822	8.56218	8.45553	8.3482	8.24012	8.13123	8.02143	7.91064	7.79876	7.68565	7.57118	7.4552	7.33751	7.21792	7.09617	6.97201	6.84515	6.71529	6.5822	6.44591	6.34352
180	0	0	0.000271777	0.000516765	0.000983427	0.0018731	0.0035707	0.00681265	0.0130092	0.0248628	0.0475573	0.0913908	0.175806	0.33852	0.652413	1.2584	2.42908	4.69208	9.06895	15.0067	24.5159	28.0241	31.3671	34.5451	39.4359	44.0791	45.7816	47.3602	47.3524	47.2735	47.205	47.1477	47.1032	47.0727	47.0582	47.0616	47.0855	47.1328	47.2071	47.313	47.4559	47.643	47.8834	48.1895	48.5778	49.0717	49.7055	50.5323	51.9379
184	0	0	0	0	0	0	0	0	0	0	0	0	0	0	0	0	0	0	0	0	0	0	0	0	0	0	0	0	0	0	0	0	0	0	0	0	0	0	0	0	0	0	0	0	0	0	0	0	0
188	0	0	0	0	0	0	0	0	0	0	0	0	0	0	0	0	0	0	0	0	0	0	0	0	0	0	0	4.89092e-07	1.0499e-06	2.25359e-06	4.83696e-06	1.03811e-05	2.22783e-05	4.78071e-05	0.000102582	0.0002201	0.00047221	0.00101302	0.0022442	0.00496837	0.011634	0.0275971	0.0639666	0.145508	0.364994	0.927308	2.24163	5.70515	3.138
191	0	0	0	0	0	0	0	0	0	0	0	0	0	0	0	0	0	0	0	0	0	0	0	0	0	0	0	0	0	0	0	0	0	0	0	0	0	0	0	0	0	0	0	0	0	0	0	0	0
192	0	0	0	0	0	0	0	0	0	0	0	0	0	0	0	0	0	0	0	0	0	0	0	0	0	0	0	1.59902e-07	3.68664e-07	8.49921e-07	1.95928e-06	4.51634e-06	1.04099e-05	2.39925e-05	5.52936e-05	0.000127422	0.000293616	0.000676524	0.00155867	0.0035908	0.00893039	0.0221266	0.0548182	0.115281	0.241607	0.512248	1.08741	2.30819	6.04733
196	0	0	0	0	0	0	0	0	0	0	0	0	0	0	0	0	0	0	0	0	0	0	0	0	0	0	0	0	0	0	0	0	0	0	0	0	0	0	0	0	0	0	0	0	0	0	0	0	0
203	0	0	0	0	0	0	0	0	0	0	0	0	0	0	0	0	0	0	0	0	0	0	0	0	0	0	0	0	0	0	0	0	0	0	0	0	0	0	0	0	0	0	0	0	0	0	0	0	0
204	0	0	8.77827e-06	2.16643e-05	5.34574e-05	0.000131885	0.000325316	0.000802301	0.00197828	0.004877	0.0120208	0.0202607	0.0341389	0.057506	0.096837	0.163015	0.274327	0.461484	0.776047	1.30453	2.19206	2.4546	2.74742	3.0738	3.38366	3.677	3.71418	3.48441	3.19065	2.92146	2.67481	2.44882	2.24176	2.05208	1.87831	1.71913	1.57332	1.43978	1.31747	1.22429	1.13762	1.05699	0.982005	0.91226	0.922338	0.932447	0.942584	0.952746	0.968487
208	0	0	0	0	0	0	0	0	0	0	0	0	0	0	0	0	0	0	0	0	0	0	0	0	0	0	0	0	0	0	0	0	0	0	0	0	0	0	0	0	0	0	0	0	0	0	0	0	0
212	0	0	0	0	0	0	0	0	0	0	0	0	0	0	0	0	0	0	0	0	0	0	0	0	0	0	0	0	0	0	0	0	0	0	0	0	0	0	0	0	0	0	0	0	0	0	0	0	0
214	0	0	0	0	0	0	0	0	0	0	0	0	0	0	0	0	0	0	0	0	0	0	0	0	0	0	0	3.09269	3.16953	3.24738	3.32619	3.40589	3.48641	3.56767	3.64956	3.73198	3.81481	3.89791	3.98112	4.18041	4.38758	4.60268	4.8257	5.0566	6.48669	8.31566	10.7077	13.6892	16.94
218	0	0	0	0	0	0	0	0	0	0	0	0	0	0	0	0	0	0	0	0	0	0	0	0	0	0	0	1.98275e-07	3.93422e-07	7.80584e-07	1.54865e-06	3.07225e-06	6.0944e-06	1.20886e-05	2.39766e-05	4.75522e-05	9.43019e-05	0.000186999	0.000370787	0.00073515	0.00182088	0.00412485	0.0093433	0.0207519	0.0455523	0.103094	0.224687	0.489649	1.12678
222	0	0	0	0	0	0	0	0	0	0	0	0	0	0	0	0	0	0	0	0	0	0	0	0	0	0	0.410322	0.437334	0.438676	0.441299	0.445688	0.45253	0.462803	0.477907	0.49986	0.582452	0.66356	0.743183	0.821323	0.897977	1.03119	1.16188	1.29006	1.49837	1.70265	2.02026	2.33164	2.63678	3.35893
226	0	0	0	0	0	0	0	0	0	0	0	0	0	0	0	0	0	0	0	0	0	0	0	0	0	0	0	0	0	0	0	0	0	0	0	0	0	0	0	0	0	0	0	0	0	0	0	0	0
231	0	0	0	0	0	0	0	0	0	0	0	0	0	0	0	0	0	0	0	0	0	0	0	0	0	0	0	0	0	0	0	0	0	0	0	0	0	0	0	0	0	0	0	0	0	0	0	0	0
232	0	0	0	0	0	0	0	0	0	0	0	0	0	0	0	0	0	0	0	0	0	0	0	0	0	0	0	0	0	0	0	0	0	0	0	0	0	0	0	0	0	0	0	0	0	0	0	0	0
233	0	0	0	0	0	0	0	0	0	0	0	0	0	0	0	0	0	0	0	0	0	0	0	0	0	0	0	0	0	0	0	0	0	0	0	0	0	0	0	0	0	0	0	0	0	0	0	0	0
234	0	0	0	0	0	0	0	0	0	0	0	0	0	0	0	0	0	0	0	0	0	0	0	0	0	0	0	0	0	0	0	0	0	0	0	0	0	0	0	0	0	0	0	0	0	0	0	0	0
238	0	0	0	0	0	0	0	0	0	0	0	0	0	0	0	0	0	0	0	0	0	0	0	0	0	0	0	0	0	0	0	0	0	0	0	0	0	0	0	0	0	0	0	0	0	0	0	0	0
242	0	0	0	0	0	0	0	0	0	0	0	0	0	0	0	0	0	0	0	0	0	0	0	0	0	0	0	0	0	0	0	0	0	0	0	0	0	0	0	0	0	0	0	0	0	0	0	0	4.184
246	0	0	0	0	0	0	0	0	0	0	0	0	0	0	0	0	0	0	0	0	0	0	0	0	0	0	0	0	0	0	0	0	0	0	0	0	0	0	0	0	0	0	0	0	0	0	0	0	0
250	0	0	0	0	0	0	0	0	0	0	0	0	0	0	0	0	0	0	0	0	4.51709	7.90183	10.4585	15.6191	10.5689	14.0592	16.9297	19.862	20.2411	20.6115	20.9732	21.3262	21.6705	21.9855	22.2921	22.5904	22.8804	23.1621	24.5961	25.7956	26.5962	27.6838	28.7327	29.1211	29.3361	30.0217	30.4574	30.7395	31.197
254	0	0	0	0	0	0	0	0	0	0	0	0	0	0	0	0	0	0	0	0	0	0	0	0	0	0	0	0.0482834	0.0525465	0.0571535	0.0621263	0.0674872	0.0732582	0.0794611	0.086116	0.0932414	0.100853	0.108962	0.117573	0.126683	0.136278	0.146328	0.156782	0.16756	0.178542	0.189553	0.200338	0.210525	0.220829
258	0	0	0	0	0	0	0	0	0	0	0	0	0	0	0	0	0	0	0	0	0	0	0	0	0	0	0	0	0	0	0	0	0	0	0	0	0	0	0	0	0	0	0	0	0	0	0	0	0
262	0	0	0	0	0	0	0	0	0	0	0	0	0	0	0	0	0	0	0	0	0	0	0	0	0	0	0	0	0	0	0	0	0	0	0	0	0	0	0	0	0	0	0	0	0	0	0	0	0
266	0	0	1.24899e-06	2.77419e-06	6.16086e-06	1.36795e-05	3.03686e-05	6.74059e-05	0.000149586	0.000331893	0.000736243	0.00124092	0.00209092	0.0035221	0.00593103	0.00998427	0.0168018	0.0282648	0.047531	0.0798995	0.134258	0.225508	0.378613	0.635387	1.06581	1.78695	2.9945	5.01542	5.0109	4.94868	4.88604	4.82295	4.75935	4.69521	4.63044	4.565	4.49879	4.43173	4.3637	4.29457	4.2242	4.1524	4.07894	4.00356	3.92592	3.84559	3.76206	3.67468	3.60343
268	0	0	0	0	0	0	0	0	0	0	0	0	0	0	0	0	0	0	0	0	0	0	0	0	0	0	0	0	0	0	0	0	0	0	0	0	0	0	0	0	0	0	0	0	0	0	0	0	0
270	0	0	2.65975e-07	5.2513e-07	1.03662e-06	2.04596e-06	4.03737e-06	7.96562e-06	1.5713e-05	3.09895e-05	6.11061e-05	0.000102993	0.000173541	0.000292325	0.000492259	0.000828667	0.00139451	0.0023459	0.00394494	0.00663144	0.0111431	0.0187165	0.0314239	0.0527354	0.0884594	0.148312	0.248535	0.416266	0.372851	0.333942	0.299073	0.267827	0.23983	0.214744	0.192269	0.172133	0.154095	0.137937	0.123464	0.183574	0.272928	0.405743	0.603141	0.8965	1.33243	1.98017	2.94254	4.37224	6.53347
275	0	0	0	0	0	0	0	0	0	0	0	0	0	0	0	0	0	0	0	0	0	0	0	0	0	0	0	0	0	0	0	0	0	0	0	0	0	0	0	0	0	0	0	0	0	0	0	0	0
276	0	0	0	0	0	0	0	0	0	0	0	0	0	0	0	0	0	0	0	0	0	0	0	0	0	0	0	0	0	0	0	0	0	0	0	0	0	0	0	0	0	0	0	0	0	0	0	0	0
288	0	0	1.46315e-05	3.24988e-05	7.21726e-05	0.000160252	0.000355759	0.000789641	0.00175235	0.00388803	0.00862486	0.014537	0.0244946	0.0412604	0.0694802	0.116963	0.196829	0.331114	0.556811	0.935999	1.5728	2.64175	4.43534	7.44337	12.4857	20.9336	35.0797	58.7542	57.9966	57.2342	56.4666	55.6932	54.9134	54.1265	53.3318	52.5285	51.7155	50.8916	50.0556	49.2057	48.3402	47.4568	46.5526	45.6246	44.6685	43.6794	42.6514	41.5774	40.6832
292	0	0	0	0	0	0	0	0	0	0	0	0	0	0	0	0	0	0	0	0	0	0	0	0	0	0	0	0	0	0	0	0	0	0	0	0	0	0	0	0	0	0	0	0	0	0	0	0	0
296	0	0	0	0	0	0	0	0	0	0	0	0	0	0	0	0	0	0	0	0	0	0	0	0	0	0	0	0	0	0	0	0	0	0	0	0	0	0	0	0	0	0	0	0	0	0	0	0	0
300	0	0	0	0	0	0	0	0	0	0	0	0	0	0	0	0	0	0	0	0	2.57651	4.08963	4.33908	4.53817	3.19722	3.47439	5.09447	4.97735	5.16027	5.3396	5.51533	5.68747	5.85602	6.02098	6.18234	6.34011	6.49429	6.64487	6.79187	6.93527	7.53393	8.18269	8.88862	9.65272	10.4845	11.5008	12.6117	13.8307	14.772
304	0	0	0	0	0	0	0	0	0	0	0	0	0	0	0	0	0	0	0	0	0	0	0	0	0	0	0	0	0	0	0	0	0	0	0	0	0	0	0	0	0	0	0	0	0	0	0	0	0
308	0	0	0	0	0	0	0	0	0	0	0	0	0	0	0	0	0	0	0	0	0	0	0	0	0	0	0	0	0	0	0	0	0	0	0	0	0	0	0	0	0	0	0	0	0	0	0	0	0
312	0	0	0	0	0	0	0	0	0	0	0	0	0	0	0	0	0	0	0	0	0	0	0	0	0	0	0	0	0	0	0	0	0	0	0	0	0	0	0	0	0	0	0	0	0	0	0	0	0
316	0	0	0	0	0	0	0	0	0	0	0	0	0	0	0	0	0	0	0	0	0	0	0	0	0	0	0	0	0	0	0	0	0	0	0	0	0	0	0	0	0	0	0	0	0	0	0	0	0
320	0	0	0	0	0	0	0	0	0	0	0	0	0	0	0	0	0	0	0	0	0	0	0	0	0	0	0	0.000922578	0.00180582	0.00353444	0.00691729	0.013537	0.0264898	0.051833	0.101415	0.198412	0.388151	0.759279	1.48515	1.45277	1.62576	1.81316	2.02199	2.27533	2.52383	2.71712	2.83419	2.95604	3.26509
324	0	0	1.51404e-05	3.36292e-05	7.4683e-05	0.000165826	0.000368133	0.000817106	0.0018133	0.00402327	0.00892486	0.0150426	0.0253465	0.0426955	0.0718969	0.121031	0.203675	0.34263	0.576179	0.968555	1.6275	2.73364	4.58962	7.70227	12.9199	21.6617	36.2998	60.7978	60.7112	60.6408	60.5882	60.5554	60.5445	60.5582	60.5994	60.6718	60.7795	60.9279	61.1232	61.3733	61.6879	62.0795	62.5646	63.1648	63.9098	64.8419	66.0231	67.5506	69.9879
328	0	0	0	0	0	0	0	0	0	0	0	0	0	0	0	0	0	0	0	0	0	0	0	0	0	0	0	3.46927e-07	7.21079e-07	1.49865e-06	3.1145e-06	6.47212e-06	1.34486e-05	2.79431e-05	5.80555e-05	0.000120609	0.000250545	0.000520427	0.00108094	0.00225569	0.0047068	0.00982058	0.0204886	0.0427419	0.0917578	0.196968	0.422775	0.907371	1.95848
332	0	0	0	0	0	0	0	0	0	0	0	0	0	0	0	0	0	0	0	0	0	0	0	0	0	0	0	0.0015523	0.00240606	0.00372915	0.00577942	0.00895633	0.0138786	0.0215046	0.0333186	0.0516191	0.0799655	0.123869	0.191862	0.297155	0.416074	0.552267	0.73298	1.01049	1.3786	1.81953	2.54202	3.55108	5.12775
334	0	0	0	0	0	0	0	0	0	0	0	0	0	0	0	0	0	0	0	0	0	0	0	0	0	0	0	0	0	0	0	0	0	0	0	0	0	0	0	0	0	0	0	0	0	0	0	0	0
336	0	0	0	0	0	0	0	0	0	0	0	0	0	0	0	0	0	0	0	0	0	0	0	0	0	0	0	0	0	0	0	0	0	0	0	0	0	0	0	0	0	0	0	0	0	0	0	0	0
340	0	0	0	0	0	0	0	0	0	0	0	0	0	0	0	0	0	0	0	0	0	0	0	0	0	0	0	1.51803e-08	3.11562e-08	6.39413e-08	1.31217e-07	2.69258e-07	5.52481e-07	1.13354e-06	2.32554e-06	4.7707e-06	9.78604e-06	2.00724e-05	4.11681e-05	8.44282e-05	0.000318785	0.00073719	0.00170461	0.00376115	0.00802662	0.017128	0.0365464	0.0779726	0.167301
0	0	0	0	0	0	0	0	0	0	0	0	0	0	0	0	0	0	0	0	0	0	0	0	0	0	0	0	0	0	0	0	0	0	0	0	0	0	0	0	0	0	0	0	0	0	0	0	0	0
348	0	0	0	0	0	0	0	0	0	0	0	0	0	0	0	0	0	0	0	0	1.60703	1.88947	2.46735	3.77408	2.95433	3.61175	3.53059	4.13931	4.54941	4.95236	5.34816	5.73682	6.11832	6.49268	6.85989	7.21995	7.57286	7.91862	8.25723	8.5887	9.61938	10.6303	11.2035	11.6206	12.157	12.9365	13.8279	15.1417	16.4369
352	0	0	0	0	0	0	0	0	0	0	0	0	0	0	0	0	0	0	0	0	0	0	0	0	0	0	0	0	0	0	0	0	0	0	0	0	0	0	0	0	0	0	0	0	0	0	0	0	0
356	0	0	0	14.5212	27.3134	51.3056	96.2348	180.233	336.994	628.991	1171.76	1204.47	1234.89	1263.06	1289	1312.75	1334.31	1353.72	1371.01	1386.19	1399.3	1410.36	1419.4	1426.43	1431.5	1434.61	1435.8	1706.6	1729.77	1752.3	1774.21	1795.49	1816.15	1836.18	1855.58	1874.37	1892.53	1910.07	2408.73	2978.26	3886.06	4722.85	6399.3	8332.5	10822.5	13459.4	18111.8	18827.6	16588.1
360	0	0	0.0649379	0.116349	0.208199	0.372057	0.663926	1.18294	12.3449	32.6815	67.8105	72.1925	76.3363	80.2445	83.9198	87.3646	90.5816	93.5734	96.3424	98.8914	101.223	109.702	117.65	125.073	155.328	183.834	196.186	213.236	213.657	214.042	214.391	214.704	214.98	223.744	232.32	240.71	248.913	256.929	268.832	280.474	291.855	302.976	313.836	396.318	477.155	556.349	633.902	709.817	1559.69
364	0	0	0.000120525	0.000248699	0.00100592	0.00280949	0.00727657	0.0153819	0.0295839	0.0538579	0.159298	0.24472	0.375237	0.574338	0.877603	1.33885	2.03941	2.73176	3.62205	5.58746	8.59733	13.3374	20.6249	21.2002	33.3391	52.1701	95.6208	140.134	143.372	143.65	143.866	144.016	144.095	144.1	144.023	143.86	143.605	143.249	142.787	142.208	146.412	150.159	153.435	156.225	158.511	177.023	193.866	203.81	213.532
368	0	0	0.000195588	0.000322085	0.000530529	0.00142786	0.0063397	0.0156351	0.0404798	0.0855377	0.1012	0.156711	0.24205	0.35676	0.525669	0.739101	1.03649	2.66992	5.61228	7.42945	9.70978	8.32442	6.40576	4.56066	4.46258	4.3645	5.33302	4.16834	4.13569	4.10304	4.07037	4.03769	4.005	3.97229	3.93958	3.90685	3.87412	3.84137	4.00838	4.18234	4.3635	4.55215	4.74857	4.95305	5.6087	6.35059	7.18999	8.13961	9.26697
372	0	0	0	0	0	0	0	0	0	0	0	0	0	0	0	0	0	0	0	0	0	0	0	0	0	0	0	0	0	0	0	0	0	0	0	0	0	0	0	0	0	0	0	0	0	0	0	0	0
376	0	0	0	0	0	0	0	0	0	0	0	0	0	0	0	0	0	0	0	0	0	0	0	0	0	0	0	0	0	0	0	0	0	0	0	0	0	0	0	0	0	0	0	0	0	0	0	0	0
380	0	0	0	0	0	0	0	0	0	0	0	0	0	0	0	0	0	0	0	0	12.5651	23.0837	29.564	42.5611	26.6533	29.326	42.2774	41.9528	42.8973	44.0186	45.1663	46.3408	47.5425	48.7721	50.0299	51.3165	52.6323	53.9778	55.3536	56.76	59.9857	63.3908	66.9851	70.775	71.7964	75.4878	204.58	171.15	150.624
384	0	0	4.17261e-05	8.65014e-05	0.000179294	0.000371563	0.000769878	0.0015949	0.0033034	0.00684079	0.0141633	0.0238719	0.0402238	0.0677558	0.114097	0.192071	0.323222	0.543739	0.914369	1.53705	2.58277	4.33816	7.28351	12.2232	20.5034	34.3761	57.6062	96.4833	96.3372	96.2124	96.111	96.0356	95.989	95.9747	95.9967	96.0596	96.1692	96.3321	96.5568	96.8533	97.2345	97.7167	98.3209	99.0752	100.018	101.203	102.71	104.662	107.881
388	0	0	0	0	0	0	0	0	0	0	0	0	0	0	0	0	0	0	0	0	0	0	0	0	0	0	0	5.30108e-09	1.22702e-08	2.83997e-08	6.57272e-08	1.52106e-07	3.51981e-07	8.14446e-07	1.8844e-06	4.35968e-06	1.00856e-05	2.33303e-05	5.3964e-05	0.000109873	0.000223687	0.000455363	0.000926914	0.00188662	0.00423711	0.00951519	0.0213662	0.0479732	0.108325
392	0	0	0.137803	0.296281	0.63621	1.36431	2.92149	6.2464	13.3334	28.4111	60.4237	96.8989	130.366	196.598	256.886	368.606	469.262	670.655	779.091	859.269	761.024	740.005	715.391	759.637	893.943	1080.66	1344.41	1854.65	1973.3	1932.01	1890.52	1848.82	1806.86	1752.45	1698.3	1644.38	1590.65	1537.06	1536.92	1533.7	1527.25	1517.4	1503.93	1503.5	1497.58	1539.5	1855.02	1890.58	1963.03
398	0	0	0	0	0	0	0	0	0	0	0	0	0	0	0	0	0	0	1.01042	1.51997	2.28447	2.28698	2.28748	2.49591	2.73896	2.99128	3.33867	3.66699	3.60306	3.53968	3.47686	3.4146	3.3529	3.29175	3.23117	3.17114	3.11167	3.05276	2.9944	2.93661	2.87937	2.82269	2.76657	2.711	2.656	3.38646	3.96213	5.32463	6.69889
400	0	0	0	0	0	0	0	0	0	0	0	0	0	0	0	0	0	0	0	0	0	0	0	0	0	0	0	0	0	0	0	0	0	0	0	0	0	0	0	0	0	0	0	0	0	0	0	0	0
404	0	0	0	0	0	0	0	0	0	0	0	0	0	0	0	0	0	0	0	0	0	0	0	0	0	0	0	1.1315	1.32749	1.52018	1.70955	1.89562	2.03691	2.04758	2.05964	2.07328	2.08874	2.10627	2.12623	2.14903	2.17518	2.20538	2.24051	2.28175	2.33074	2.38981	2.46246	2.55417	2.68968
408	0	0	0	3.11536	3.48996	3.88789	4.30414	4.7312	5.15836	5.57101	5.94978	7.37236	9.13118	11.3046	13.9891	17.303	21.3915	26.4329	32.6458	35.4362	37.9693	43.9132	56.3973	40.7172	45.6991	50.2105	60.298	72.3603	78.707	82.0364	85.5008	89.1054	92.8554	96.7563	100.814	105.034	109.422	113.985	118.729	123.661	124.501	123.787	123.068	122.343	121.611	120.81	120.673	120.524	121.06
410	0	0	0	3.24993	3.70232	4.20263	4.75203	5.35047	5.99621	6.68533	7.4111	9.90683	13.2383	17.6836	23.6128	31.5176	42.0517	56.0834	74.7649	81.5391	87.7887	102.03	131.692	95.5626	107.813	119.085	143.784	173.5	189.029	200.656	212.983	226.052	239.907	254.593	270.159	286.655	304.137	322.66	342.285	363.076	363.705	360.741	357.772	357.946	358.049	356.027	353.977	351.916	748.972
414	0	0	0	0	0	0	0	0	0	0	0	0	0	0	0	0	0	0	0	0	0	0	0	0	0	0	0	0	0	0	0	0	0	0	0	0	0	0	0	0	0	0	0	0	0	0	0	0	0
417	0	0	3.45192e-05	5.96341e-05	0.000103004	0.000177886	0.00030715	0.000530248	0.000915223	0.00157939	0.00272501	0.00430588	0.00680187	0.0107415	0.0169575	0.0267621	0.0422213	0.0665874	0.104977	0.161121	0.246767	0.261124	0.274684	0.287446	0.299411	0.310578	0.346969	0.381367	0.399618	0.418418	0.438072	0.458619	0.480097	0.502546	0.526008	0.550525	0.576143	0.602909	0.63087	0.660077	0.690582	0.722439	0.755704	0.790436	0.826695	0.864542	0.904044	0.945266	0.993979
418	0	0	0.00696479	0.0124788	0.02233	0.0399043	0.0712081	0.126874	0.225686	0.400746	0.710243	0.747975	0.787466	0.828776	0.871963	0.917085	0.964199	1.01336	1.06462	1.22076	1.3683	1.50734	1.63798	1.76032	1.87444	1.98046	2.40881	2.81106	2.83373	2.85563	2.87676	2.89712	2.91672	2.93554	2.9536	2.9709	2.98743	3.00319	3.31577	3.62209	69.071	74.2455	79.3102	84.2654	89.1111	93.8475	136.944	272.831	300.401
422	0	0	0	0	0	0	0	0	0	0	0	0	0	0	0	0	0	0	0	0	0	0	0	0	0	0	0	0	0	0	0	0	0	0	0	0	0	0	0	0	0	0	0	0	0	0	0	0	0
426	0	0	0	0	0	0	0	0	0	0	0	0	0	0	0	0	0	0	0	0	0	0	0	0	0	0	0	0	0	0	0	0	0	0	0	0	0	0	0	0	0	0	0	0	0	0	0	0	0
428	0	0	0	0	0	0	0	0	0	0	0	0	0	0	0	0	0	0	0	0	0	0	0	0	0	0	0	0	0	0	0	0	0	0	0	0	0	0	0	0	0	0	0	0	0	0	0	0	0
430	0	0	7.88241e-05	0.00017508	0.000388815	0.000863323	0.00191658	0.00425402	0.00944044	0.020946	0.0464647	0.0721322	0.111946	0.173683	0.269382	0.417677	0.647389	1.00309	1.55365	2.4055	3.72295	5.75959	8.90658	13.767	21.2698	32.8459	50.6964	78.2068	78.3066	78.4311	78.5829	78.7651	78.9811	79.2351	79.532	79.8773	80.2781	80.7426	81.2809	81.9055	82.6323	83.4814	84.4791	85.6605	87.0738	88.7874	90.9026	93.5779	97.6397
434	0	0	0	0	0	0	0	0	0	0	0	0	0	0	0	0	0	0	0	0	0	0	0	0	0	0	0	0	0	0	0	0	0	0	0	0	0	0	0	0	0	0	0	0	0	0	0	0	0
438	0	0	0	0	0	0	0	0	0	0	0	0	0	0	0	0	0	0	0	0	0	0	0	0	0	0	0	0	0	0	0	0	0	0	0	0	0	0	0	0	0	0	0	0	0	0	0	0	0
440	0	0	0	0	0	0	0	0	0	0	0	0	0	0	0	0	0	0	0	0	0	0	0	0	0	0	0	0	0	0	0	0	0	0	0	0	0	0	0	0	0	0	0	0	0	0	0	0	0
442	0	0	0	0	0	0	0	0	0	0	0	0	0	0	0	0	0	0	0	0	0	0	0	0	0	0	0	0	0	0	0	0	0	0	0	0	0	0	0	0	0	0	0	0	0	0	0	0	0
446	0	0	0	0	0	0	0	0	0	0	0	0	0	0	0	0	0	0	0	0	0	0	0	0	0	0	0	0	0	0	0	0	0	0	0	0	0	0	0	0	0	0	0	0	0	0	0	0	0
450	0	0	5.01166e-07	1.11317e-06	2.4721e-06	5.48903e-06	1.21856e-05	2.70472e-05	6.00225e-05	0.000133175	0.000295423	0.000871375	0.00256944	0.00757426	0.0223206	0.0657553	0.193646	0.57008	1.67766	3.70145	7.25631	15.1081	28.7229	51.763	90.0442	173.378	308.7	532.241	531.373	527.777	524.224	520.722	517.276	513.896	510.592	507.376	504.263	501.273	498.431	495.767	493.322	491.152	489.329	487.958	487.191	487.252	488.499	491.53	500.306
454	0	0	2.1241e-05	3.94179e-05	7.31493e-05	0.000135746	0.000251913	0.000467495	0.000867588	0.00161013	0.00298831	0.00538649	0.00970643	0.0174856	0.0314896	0.0566908	0.102026	0.183552	0.330102	0.570835	0.964709	1.13426	1.29602	1.44999	1.59615	1.73453	1.83967	1.93819	1.95319	1.97446	1.99749	2.02248	2.04969	2.0794	2.11194	2.14774	2.18728	2.23117	2.28018	2.33524	2.39757	2.46874	2.55085	2.64676	2.76051	2.89796	3.06811	3.28558	3.59677
458	0	0	0.0109678	0.0197018	0.035352	0.06336	0.113416	0.202747	0.361918	0.645054	1.14778	1.37332	1.64268	1.96424	2.34796	2.80568	3.35144	4.00188	4.77672	5.48228	6.14903	7.19725	8.1865	9.11746	9.9908	10.8072	11.4095	11.965	12.052	12.1776	12.3139	12.4622	12.6239	12.8009	12.9952	13.2093	13.4462	13.7097	14.0043	14.3357	14.7115	15.1411	15.6374	16.2178	16.9068	17.7403	18.7732	20.0944	21.9873
462	0	0	0	0	0	0	0	0	0	0	0	0	0	0	0	0	0	0	0	0	0	0	0	0	0	0	0	0	0	0	0	0	0	0	0	0	0	0	0	0	0	0	0	0	0	0	0	0	0
466	0	0	6.97714e-06	1.29144e-05	2.39001e-05	4.4223e-05	8.18125e-05	0.000151325	0.000279848	0.000517428	0.000956513	0.00134348	0.00188645	0.00264806	0.00371599	0.00521291	0.00731037	0.0102482	0.0143614	0.0185811	0.0239647	0.031552	0.0413218	0.0548095	0.0744872	0.0986208	0.14059	0.196226	0.247629	0.310468	0.389417	0.488668	0.613529	0.770732	0.968832	1.21872	1.5343	1.93336	2.43877	3.08002	3.89536	4.93469	6.2637	7.96964	10.1701	13.0264	16.7655	21.7185	28.5582
470	0	0	0	0	0	0	0	0	0	0	0	0	0	0	0	0	0	0	0	0	0	0	0	0	0	0	0	0	0	0	0	0	0	0	0	0	0	0	0	0	0	0	0	0	0	0	0	0	0
474	0	0	0	0	0	0	0	0	0	0	0	0	0	0	0	0	0	0	0	0	0	0	0	0	0	0	0	0	0	0	0	0	0	0	0	0	0	0	0	0	0	0	0	0	0	0	0	0	0
478	0	0	8.60772e-06	1.69947e-05	3.3548e-05	6.62132e-05	0.000130661	0.00025779	0.000508517	0.00100291	0.00197757	0.00333314	0.00561628	0.00946046	0.0159309	0.026818	0.0451302	0.07592	0.12767	0.198218	0.306779	0.484687	0.761718	1.24406	1.99195	3.14143	5.37397	9.00073	8.90883	8.77606	8.64221	8.50718	8.37083	8.23303	8.0936	7.95237	7.8091	7.66354	7.51538	7.36425	7.20972	7.05124	6.88815	6.71961	6.54454	6.36155	6.16874	5.96353	5.77533
480	0	0	0	0	0	0	0	0	0	0	0	0	0	0	0	0	0	0	0	0	0	0	0	0	0	0	0	0	0	0	0	0	0	0	0	0	0	0	0	0	0	0	0	0	0	0	0	0	0
484	0	0	0	0	0	0	0	0	0	0	0	0	0	0	0	0	0	0	0	0	0	0	0	0	0	0	4.93878	19.301	20.7534	22.1798	23.5804	24.955	26.3037	27.6265	28.9234	30.1944	31.4394	32.6586	33.8518	35.0191	36.1605	37.2759	38.3655	39.4291	40.4669	41.4787	48.4847	55.1854	87.864
492	0	0	0	0	0	0	0	0	0	0	0	0	0	0	0	0	0	0	0	0	0	0	0	0	0	0	0	0	0	0	0	0	0	0	0	0	0	0	0	0	0	0	0	0	0	0	0	0	0
496	0	0	0	0	0	0	0	0	0	0	0	0	0	0	0	0	0	0	0	0	0	0	0	0	0	0	0	0	0	0	0	0	0	0	0	0	0	0	0	0	0	0	0	0	0	0	0	0	0
498	0	0	0	0	0	0	0	0	0	0	0	0	0	0	0	0	0	0	0	0	0	0	0	0	0	0	0	0	0	0	0	0	0	0	0	0	0	0	0	0	0	0	0	0	0	0	0	0	0
500	0	0	0	0	0	0	0	0	0	0	0	0	0	0	0	0	0	0	0	0	0	0	0	0	0	0	0	0	0	0	0	0	0	0	0	0	0	0	0	0	0	0	0	0	0	0	0	0	0
504	0	0	2.21552e-05	4.92102e-05	0.000109285	0.000242656	0.000538696	0.00119569	0.00265344	0.00588732	0.0130599	0.0205798	0.0324203	0.0510576	0.0803837	0.126513	0.199047	0.313057	0.492192	0.78783	1.25226	1.16562	1.0815	1.18225	1.03596	0.84433	1.23803	0.940779	0.974983	1.00851	1.04137	1.07356	1.10507	1.1359	1.16607	1.19556	1.22438	1.25253	1.28	1.3068	1.52733	1.74372	1.95596	2.16405	2.36801	2.56781	2.76348	2.955	3.1605
508	0	0	4.37501e-05	9.06973e-05	0.000187991	0.000389586	0.000807223	0.00167226	0.00346364	0.00717262	0.0148504	0.0246388	0.0408672	0.0677641	0.112328	0.186138	0.308345	0.510606	0.845235	1.78715	3.42736	4.92524	6.35849	7.72713	9.03114	10.2705	12.5497	14.7134	15.079	15.4367	15.7867	16.1289	16.4633	16.7899	17.1087	17.4197	17.7229	18.0183	18.306	18.5858	18.8689	20.7783	22.879	25.19	26.5188	27.9153	29.3828	30.9247	32.7324
512	0	0	0	0	0	0	0	0	0	0	0	0	0	0	0	0	0	0	0	0	0	0	0	0	0	0	0	0	0	0	0	0	0	0	0	0	0	0	0	0	0	0	0	0	0	0	0	0	0
516	0	0	0	0	0	0	0	0	0	0	0	0	0	0	0	0	0	0	0	0	0	0	0	0	0	0	0	0	0	0	0	0	0	0	0	0	0	0	0	0	0	0	0	0	0	0	0	0	0
520	0	0	0	0	0	0	0	0	0	0	0	0	0	0	0	0	0	0	0	0	0	0	0	0	0	0	0	0	0	0	0	0	0	0	0	0	0	0	0	0	0	0	0	0	0	0	0	0	0
524	0	0	0.0266987	0.047836	0.0855993	0.152969	0.272968	0.486358	0.865141	1.53621	2.72263	2.77975	2.83717	2.89486	2.95273	3.01073	3.06877	3.12678	3.18466	3.21994	3.25039	3.38176	3.50313	3.61463	3.71637	3.80847	4.63219	5.40574	5.49117	5.57441	5.65545	5.73431	5.81098	5.88546	5.95776	6.02788	6.09583	6.1616	6.2252	6.28664	113.348	116.962	120.681	124.28	127.788	133.198	192.577	369.57	447.07
528	0	0	0	0	0	0	0	0	0	0	0	0	0	0	0	0	0	0	0	0	0	0	0	0	0	0	0	0	0	0	0	0	0	0	0	0	0	0	0	0	0	0	0	0	0	0	0	0	0
530	0	0	0	0	0	0	0	0	0	0	0	0	0	0	0	0	0	0	0	0	0	0	0	0	0	0	0	0	0	0	0	0	0	0	0	0	0	0	0	0	0	0	0	0	0	0	0	0	0
533	0	0	0	0	0	0	0	0	0	0	0	0	0	0	0	0	0	0	0	0	0	0	0	0	0	0	0	1.5208e-09	3.26458e-09	7.00736e-09	1.50402e-08	3.22792e-08	6.92728e-08	1.48653e-07	3.18971e-07	6.84383e-07	1.4683e-06	3.14992e-06	6.75695e-06	1.38419e-05	2.83534e-05	5.80738e-05	0.000118938	0.000268644	0.000652569	0.00210972	0.00502756	0.0128224	0.0250681
540	0	0	0	0	0	0	0	0	0	0	0	0	0	0	0	0	0	0	0	0	0	0	0	0	0	0	0	0	0	0	0	0	0	0	0	0	0	0	0	0	0	0	0	0	0	0	0	0	0
548	0	0	0	0	0	0	0	0	0	0	0	0	0	0	0	0	0	0	0	0	0	0	0	0	0	0	0	0	0	0	0	0	0	0	0	0	0	0	0	0	0	0	0	0	0	0	0	0	0
554	0	0	0	0	0	0	0	0	0	0	0	0	0	0	0	0	0	0	0	0	0	0	0	0	0	0	0	0	0	0	0	0	0	0	0	0	0	0	0	0	0	0	0	0	0	0	0	0	0
558	0	0	0	0	0	0	0	0	0	0	0	0	0	0	0	0	0	0	0	0	0	0	0	0	0	0	0	4.23305e-08	8.99825e-08	1.91265e-07	4.06521e-07	8.63975e-07	1.83608e-06	3.90166e-06	8.29044e-06	1.76147e-05	3.74231e-05	7.95011e-05	0.000168878	0.000358707	0.000842606	0.00194853	0.0045056	0.00947992	0.0198771	0.0448945	0.101657	0.230167	0.524091
562	0	0	0	0	0	0	0	0	0.484598	0.637157	0.837577	0.941143	1.05721	1.18722	1.33281	1.49577	1.67808	1.88196	2.10984	2.18381	2.25323	2.37329	2.48652	2.70378	2.83461	3.03845	3.4652	3.86919	3.90875	3.90981	3.91204	3.91557	3.92055	3.92715	3.93558	3.94607	3.95892	3.97447	3.99315	4.01549	4.04214	4.07395	4.11201	4.15778	4.21327	4.28129	4.36602	4.47396	4.64262
566	0	0	0	0	0	0	0	0	0	0	0	0	0	0	0	0	0	0	0	0	0	0	0	0	0	0	0	0	0	0	0	0	0.686796	0.858986	1.07478	1.34539	1.68501	2.1116	2.64797	3.32317	4.17436	5.24923	6.60937	8.33497	10.5314	13.3392	16.9491	21.6282	27.9264
570	0	0	0	0	0	0	0	0	0	0	0	0	0	0	0	0	0	0	0	0	0	0	0	0	0	0	0	0	0	0	0	0	0	0	0	0	0	0	0	0	0	0	0	0	0	0	0	0	0
574	0	0	0	0	0	0	0	0	0	0	0	0	0	0	0	0	0	0	0	0	0	0	0	0	0	0	0	0	0	0	0	0	0	0	0	0	0	0	0	0	0	0	0	0	0	0	0	0	0
578	0	0	0	0	0	0	0	0	0	0	0	0	0	0	0	0	0	0	0	0	0	0	0	0	0	0	0	0	0	0	0	0	0	0	0	0	0	0	0	0	0	0	0	0	0	0	0	0	0
580	0	0	0	0	0	0	0	0	0	0	0	0	0	0	0	0	0	0	0	0	0	0	0	0	0	0	0	0	0	0	0	0	0	0	0	0	0	0	0	0	0	0	0	0	0	0	0	0	0
583	0	0	0	0	0	0	0	0	0	0	0	0	0	0	0	0	0	0	0	0	0	0	0	0	0	0	0	0	0	0	0	0	0	0	0	0	0	0	0	0	0	0	0	0	0	0	0	0	0
584	0	0	0	0	0	0	0	0	0	0	0	0	0	0	0	0	0	0	0	0	0	0	0	0	0	0	0	0	0	0	0	0	0	0	0	0	0	0	0	0	0	0	0	0	0	0	0	0	0
585	0	0	0	0	0	0	0	0	0	0	3.03064e-05	5.58695e-05	0.000102965	0.000189701	0.000349394	0.00064331	0.00118407	0.00217864	0.00400714	0.0073675	0.0135405	0.0248756	0.04568	0.0838469	0.153832	0.282096	0.517043	0.94717	0.989323	1.03328	1.07913	1.12693	1.17676	1.22872	1.28288	1.33933	1.39816	1.45947	1.52335	1.59431	1.66846	1.74591	1.82681	1.9113	1.95961	2.00897	2.05939	2.11088	2.17596
586	0	0	0.0919562	0.226943	0.55999	1.38155	3.40783	8.40445	20.7233	51.0887	125.923	132.91	139.586	147.709	155.458	162.835	169.837	184.636	198.75	218.467	237.249	241.513	245.403	240.237	266.225	276.993	351.999	423.27	424.187	429.354	434.554	439.788	445.054	450.353	455.682	461.041	466.429	471.845	477.288	482.756	488.249	493.765	499.302	504.861	510.438	516.032	521.642	527.266	535.977
591	0	0	0	0	0	0	0	0	0	0	0	0	0	0	0	0	0	0	0	0	0	0	0	0	0	0	0	0.00266558	0.00556686	0.0116252	0.0242751	0.0506866	0.105827	0.220936	0.461221	0.962762	2.00954	4.19415	8.753	9.69969	10.7479	11.9085	13.1933	15.0628	16.8969	18.3839	21.2534	24.5687	31.4007
598	0	0	3.78724e-05	8.41205e-05	0.000186813	0.000414799	0.000920853	0.00204392	0.00453582	0.0100639	0.0223248	0.0344921	0.0532754	0.0822625	0.126982	0.195947	0.302267	0.466113	0.718512	1.10717	1.70538	2.62574	4.04109	6.2166	9.55886	14.6909	22.567	34.6472	34.037	33.4176	32.7883	32.1484	31.4971	30.8336	30.1567	29.4653	28.758	28.0331	27.2889	26.523	25.7326	24.9144	24.0644	23.1772	22.2165	21.2058	20.1333	18.9825	17.8308
600	0	0	0	0	0	0	0	0	0	0	0	0	0	0	0	0	0	0	0	0	0	0	0	0	0	0	0	3.32085e-08	6.91799e-08	1.43779e-07	2.98185e-07	6.17199e-07	1.27521e-06	2.63032e-06	5.41707e-06	1.11402e-05	2.28789e-05	4.69275e-05	0.000105444	0.000233631	0.000511877	0.00111124	0.00239398	0.00493422	0.010154	0.0208651	0.0428166	0.0877504	0.225723
604	0	0	0	0	0	0	0	0	0	0	0	0	0	0	0	0	0	0	0	0	0	0	0	0	0	0	0	0.000803802	0.0015775	0.00309573	0.00607473	0.0119196	0.0233866	0.045882	0.0900091	0.176563	0.346323	0.679251	1.33213	1.63271	2.35308	3.33153	4.71645	6.71972	9.40971	13.7845	22.4974	33.2049	58.576
608	0	0	0.128158	0.293913	0.673201	1.53988	3.51727	8.02158	18.2642	41.5122	94.1724	97.7717	101.477	105.289	109.208	113.233	117.366	121.604	125.947	138.32	149.971	156.032	161.632	166.777	171.471	175.72	55.5687	62.3746	61.1783	60.0009	58.8424	57.7023	56.5804	55.4765	54.3903	53.3215	52.2698	51.2351	50.2171	49.2154	56.7173	64.211	72.6889	82.8115	92.7262	108.619	141.753	167.297	799.977
612	0	0	0	0	0	0	0	0	0	0	0	0	0	0	0	0	0	0	0	0	0	0	0	0	0	0	0	0	0	0	0	0	0	0	0	0	0	0	0	0	0	0	0	0	0	0	0	0	0
616	0	0	0	0	0	0	0	0	0	0	0	0	0	0	0	0	0	0	0	0	0	0	0	0	0	0	0	0	0	0	0	0	0	0	0	0	0	0	0	0	0	0	0	0	0	0	0	0	0
620	0	0	9.54561e-16	2.82697e-15	8.37076e-15	2.47819e-14	7.33543e-14	2.17089e-13	6.42346e-13	1.90027e-12	5.62053e-12	1.22801e-11	2.41405e-11	4.74412e-11	9.32031e-11	1.64743e-10	2.87502e-10	5.64257e-10	1.10702e-09	2.71381e-09	6.38416e-09	1.5638e-08	3.67573e-08	9.99541e-08	1.40839e-07	4.02635e-07	1.25556e-06	2.52587e-06	6.52033e-06	1.33624e-05	2.70755e-05	5.48571e-05	0.000111135	0.000225442	0.000457251	0.000927285	0.00188023	0.00381197	0.00771023	0.0155982	0.0325876	0.06821	0.138798	0.295728	0.634928	1.36517	2.97667	6.31967	13.6963
624	0	0	3.34256e-06	7.42433e-06	1.64878e-05	3.66094e-05	8.1273e-05	0.000180393	0.000400324	0.000888219	0.00197035	0.00332097	0.00559577	0.00942592	0.0158727	0.0267201	0.0449654	0.0756427	0.127203	0.213829	0.359305	0.603507	1.01325	1.70044	2.85234	4.78226	8.01394	13.4224	13.5228	13.6319	13.7506	13.88	14.0214	14.1763	14.3465	14.5342	14.7419	14.973	15.2312	15.5215	15.85	16.225	16.657	17.1605	17.7557	18.4717	19.3527	20.4699	22.0729
626	0	0	1.12139e-06	2.07564e-06	3.84128e-06	7.10764e-06	1.31491e-05	2.43214e-05	4.4978e-05	8.31625e-05	0.000153733	0.000283406	0.000522302	0.000962285	0.00177235	0.00326328	0.00600638	0.0110515	0.0203268	0.0373727	0.0686862	0.126185	0.231718	0.425325	0.780334	1.43097	2.62278	4.80465	4.81322	4.82041	4.82614	4.83036	4.83297	4.83389	4.83305	4.83034	4.82565	4.8189	4.80995	5.12113	5.44961	5.79597	6.16068	6.54419	6.66893	6.79101	6.90975	7.0244	7.17522
630	0	0	0	0	0	0	0	0	0	0	0	0	0	0	0	0	0	0	0	0	0	0	0	0	0	0	0.00168366	0.00246743	0.00318942	0.00412239	0.00532793	0.00688555	0.00889793	0.0114977	0.0148559	0.0191936	0.0247961	0.0320316	0.0413752	0.0534402	0.0639512	0.0742661	0.0924681	0.111752	0.132783	0.153847	0.174178	0.196507	0.241241
634	0	0	0	0	0	0	0	0	0	0	0	0	0	0	0	0	0	0	0	0	0	0	0	0	0	0	0	0	0	0	0	0	0	0	0	0	0	0	0	0	0	0	0	0	0	0	0	0	0
638	0	0	0	0	0	0	0	0	0	0	0	0	0	0	0	0	0	0	0	0	0	0	0	0	0	0	0	0	0	0	0	0	0	0	0	0	0	0	0	0	0	0	0	0	0	0	0	0	0
642	0	0	0	0	0	0	0	0	0	0	0	0	0	0	0	0	0	0	0	0	0.670717	0.739313	0.804521	1.18138	0.963308	1.50742	1.47354	1.79959	2.13591	2.27001	2.41238	2.56351	2.72392	2.89417	3.07483	3.26655	3.46996	3.68576	3.91469	4.15752	4.5706	4.8129	5.06764	5.39159	5.70876	6.02376	6.33189	6.65127	7.14758
643	0	0	0.000153692	0.000265514	0.000458617	0.000792025	0.00136758	0.00236098	0.00407529	0.00703319	0.0121362	0.02014	0.0330063	0.0535531	0.0862001	0.127355	0.188661	0.303901	0.490626	0.773196	1.21262	1.78218	2.61815	2.65253	2.59549	3.27039	3.99612	4.42482	4.97227	5.51031	6.03896	6.5582	7.06805	7.56849	8.05953	8.54117	9.01341	9.47625	9.92969	10.5035	11.1318	13.0686	14.0395	15.9816	17.1744	19.59	22.3078	24.8218	30.7716
646	0	0	0	0	0	0	0	0	0	0	0	0	0	0	0	0	0	0	0	0	0	0	0	0	0	0	0	0	0	0	0	0	0	0	0	0	0	0	0	0	0	0	0	0	0	0	0	0	0
654	0	0	0	0	0	0	0	0	0	0	0	0	0	0	0	0	0	0	0	0	0	0	0	0	0	0	0	0	0	0	0	0	0	0	0	0	0	0	0	0	0	0	0	0	0	0	0	0	0
659	0	0	0	0	0	0	0	0	0	0	0	0	0	0	0	0	0	0	0	0	0	0	0	0	0	0	0	0	0	0	0	0	0	0	0	0	0	0	0	0	0	0	0	0	0	0	0	0	0
660	0	0	0	0	0	0	0	0	0	0	0	0	0	0	0	0	0	0	0	0	0	0	0	0	0	0	0	0	0	0	0	0	0	0	0	0	0	0	0	0	0	0	0	0	0	0	0	0	0
662	0	0	0	0	0	0	0	0	0	0	0	0	0	0	0	0	0	0	0	0	0	0	0	0	0	0	0	0	0	0	0	0	0	0	0	0	0	0	0	0	0	0	0	0	0	0	0	0	0
666	0	0	0	0	0	0	0	0	0	0	0	0	0	0	0	0	0	0	0	0	0	0	0	0	0	0	0	0	0	0	0	0	0	0	0	0	0	0	0	0	0	0	0	0	0	0	0	0	0
670	0	0	0	0	0	0	0	0	0	0	0	0	0	0	0	0	0	0	0	0	0	0	0	0	0	0	0	0	0	0	0	0	0	0	0	0	0	0	0	0	0	0	0	0	0	0	0	0	0
674	0	0	0	0	0	0	0	0	0	0	0	0	0	0	0	0	0	0	0	0	0	0	0	0	0	0	0	0	0	0	0	0	0	0	0	0	0	0	0	0	0	0	0	0	0	0	0	0	0
678	0	0	0	0	0	0	0	0	0	0	0	0	0	0	0	0	0	0	0	0	0	0	0	0	0	0	0	0	0	0	0	0	0	0	0	0	0	0	0	0	0	0	0	0	0	0	0	0	0
682	0	0	0	0	0	0	0	0	0	0	0	0	0	0	0	0	0	0	0	0	0	0	0	0	0	0	0	0	0	0	0	0	0	0	0	0	0	0	0	0	0	0	0	0	0	0	0	0	0
686	0	0	0	0	0	0	0	0	0.0472964	0.0621861	0.0817469	0.100466	0.123436	0.151612	0.18616	0.228508	0.280394	0.343941	0.421737	0.516935	0.633373	0.775722	0.94966	1.74313	3.19807	5.8646	10.749	19.6911	19.7073	19.7323	19.767	19.8126	19.8704	19.942	20.0292	20.1343	20.26	20.4095	20.5869	20.7973	21.0471	21.3447	21.7012	22.1314	22.6564	23.3062	24.1264	25.9346	32.0487
690	0	0	0	0	0	0	0	0	0	0	0	0	0	0	0	0	0	0	0	0	0	0	0	0	0	0	0	0	0	0	0	0	0	0	0	0	0	0	0	0	0	0	0	0	0	0	0	0	0
694	0	0	1.25766e-06	2.48308e-06	4.90166e-06	9.67434e-06	1.90907e-05	3.76654e-05	7.42989e-05	0.000146534	0.00028894	0.000473473	0.000775633	0.00127024	0.0020796	0.00340354	0.00556849	0.00910734	0.0148898	0.0243344	0.0397543	0.0649186	0.105967	0.172893	0.281958	0.459602	0.74879	1.21929	1.34423	1.48188	1.63351	1.80053	1.9845	2.18711	2.41024	2.65594	2.92647	3.22431	3.55221	3.91314	4.31041	4.74763	5.22878	5.75821	8.877	13.6838	21.0917	32.5069	50.3847
702	0	0	0	0	0	0	0	0	0	0	0	0	0	0	0	0	0	0	0	0	0	0	0	0	0	0	0	0	0	0	0	0	0	0	0	0	0	0	0	0	0	0	0	0	0	0	0	0	0
703	0	0	0	0	0	0	0	0	0	0	0	0	0	0	0	0	0	0	0	0	0	0	0	0	0	0	0	0	0	0	0	0	0	0	0	0	0	0	0	0	0	0	0	0	0	0	0	0	0
704	0	0	0.019291	0.0492666	0.125703	0.320419	0.815923	2.07547	5.27345	13.383	33.9205	35.7334	37.6315	39.6176	41.6946	43.8652	46.1324	48.4987	50.9668	52.5054	53.9183	68.3516	81.9973	94.8648	106.963	118.302	143.851	167.829	182.818	197.528	211.959	226.112	239.986	253.582	266.901	279.943	292.708	305.196	317.409	329.346	365.885	401.68	436.734	471.045	504.617	604.2	701.732	797.215	895.791
705	0	0	0	0	0	0	0	0	0	0	0	0	0	0	0	0	0	0	0	0	0	0	0	0	0	0	0	0	0	0	0	0	0	0	0	0	0	0	0	0	0	0	0	0	0	0	0	0	0
706	0	0	0	0	0	0	0	0	0	0	0	0	0	0	0	0	0	0	0	0	0	0	0	0	0	0	0	0	0	0	0	0	0	0	0	0	0	0	0	0	0	0	0	0	0	0	0	0	0
710	0	0	0	0	0	0	0	0	0	0	0	0	0	0	0	0	0	0	0	0	0	0	0	0	0	0	0	0	0	0	0	0	0	0	0	0	0	0	0	0	0	0	0	0	0	0	0	0	0
716	0	0	2.72632e-06	6.05558e-06	1.34481e-05	2.98601e-05	6.62894e-05	0.000147136	0.00032652	0.000724467	0.00160709	0.00270871	0.00456413	0.00768815	0.0129464	0.021794	0.0366756	0.0616972	0.103752	0.179415	0.303211	0.445629	0.654661	0.961318	1.41097	4.13987	6.58623	10.4084	10.3653	10.3365	10.3098	10.2853	10.2632	10.244	10.228	10.2156	10.2073	10.2038	10.206	10.2148	10.2316	10.2579	10.2961	10.3492	10.4214	10.5191	10.6519	10.8356	11.1625
724	0	0	0	0	0	0	0	0	0	0	0	0	0	0	0	0	0	0	0	0	11.8363	13.0468	15.6173	20.848	14.9598	17.2912	22.1034	20.325	22.7524	23.1958	23.6463	24.1039	24.5688	25.0408	25.5201	26.0067	26.5007	27.002	27.5107	28.0269	29.6865	29.3743	31.7834	34.7068	36.2336	37.8158	39.1963	39.6819	39.748
732	0	0	0	0	0	0	0	0	0	0	0	0	0	0	0	0	0	0	0	0	0	0	0	0	0	0	0	0	0	0	0	0	0	0	0	0	0	0	0	0	0	0	0	0	0	0	0	0	0
736	0	0	0	0	0	0	0	0	0	0	0	0	0	0	0	0	0	0	0	0	0	0	0	0	0	0	0	0	0	0	0	0	0	0	0	0	0	0	0	0	0	0	0	0	0	0	0	0	0
740	0	0	0	0	0	0	0	0	0	0	0	0	0	0	0	0	0	0	0	0	0	0	0	0	0	0	0	4.56762e-07	9.88598e-07	2.13955e-06	4.63015e-06	1.00193e-05	2.16797e-05	4.6907e-05	0.000101483	0.00021954	0.000474903	0.00102722	0.00222172	0.00471906	0.0100228	0.0212856	0.0452011	0.095979	0.21133	0.465274	1.02428	2.2547	4.99136
744	0	0	0	0	0	0	0	0	0	0	0	0	0	0	0	0	0	0	0	0	0	0	0	0	0	0	0	0	0	0	0	0	0	0	0	0	0	0	0	0	0	0	0	0	0	0	0	0	0
748	0	0	3.24345e-07	7.20421e-07	1.5999e-06	3.5524e-06	7.88633e-06	1.75045e-05	3.88455e-05	8.61885e-05	0.000191193	0.000282912	0.000418509	0.000618909	0.000914982	0.00135225	0.00199782	0.00295055	0.00435604	0.00704791	0.0113046	0.0199371	0.0341706	0.057345	0.0946886	0.154346	0.264036	0.552784	0.630367	0.669514	0.710698	0.753959	0.799323	0.846802	0.896382	0.948026	1.00166	1.05715	1.11434	1.17297	1.2327	1.29307	1.35347	1.41306	1.47075	1.52507	1.57399	1.61471	1.65267
752	0	0	0	0	0	0	0	0	0	0	0	0	0	0	0	0	0	0	0	0	0	0	0	0	0	0	0	0	0	0	0	0	0	0	0	0	0	0	0	0	0	0	0	0	0	0	0	0	0
756	0	0	0	0	0	0	0	0	0	0	0	0	0	0	0	0	0	0	0	0	0	0	0	0	0	0	0	0	0	0	0	0	0	0	0	0	0	0	0	0	0	0	0	0	0	0	0	0	0
760	0	0	0	0	0	0	0	0	0	0	0	0	0	0	0	0	0	0	0	0	0	0	0	0	0	0	0	0	0	0	0	0	0	0	0	0	0	0	0	0	0	0	0	0	0	0	0	0	0
762	0	0	5.42676e-05	9.37507e-05	0.000161933	0.000279654	0.000482869	0.000833602	0.00143882	0.00248296	0.00428399	0.00676926	0.0106932	0.0168866	0.0266589	0.0420727	0.0663761	0.104682	0.165034	0.254882	0.392597	0.603226	0.963243	1.5276	2.40821	3.77657	6.25208	10.2097	10.7241	11.0771	11.4344	11.7949	12.1577	12.5213	12.8842	13.2444	13.5997	13.9475	14.2846	14.6071	14.9104	15.1889	15.4357	15.6423	15.7977	15.8879	15.8945	15.7921	15.6341
764	0	0	0.0353948	0.0761001	0.163411	0.350425	1.83428	5.70452	15.033	36.446	129.187	139.557	149.462	158.903	167.88	176.394	184.445	192.034	199.162	205.83	212.039	248.904	283.928	317.115	348.471	378	414.929	449.585	449.44	453.984	458.544	463.118	467.706	472.306	476.918	481.54	486.171	490.809	518.876	546.363	573.27	599.597	625.346	712.469	797.853	881.497	963.405	1043.57	1055
768	0	0	6.98614e-05	0.000137931	0.00027228	0.000537395	0.00106046	0.00209226	0.0041272	0.00813975	0.0160502	0.0270522	0.0455825	0.0767824	0.129297	0.217659	0.366283	0.616177	1.03618	1.74182	2.92685	3.2774	3.66837	4.10416	4.5896	5.12998	5.73108	6.39924	6.36928	6.33904	6.30853	6.27775	6.24669	6.21535	6.18373	6.15183	6.11965	6.08719	6.05444	6.05176	6.04861	6.04498	6.04086	6.03625	6.10293	6.16981	6.23689	6.30413	6.40828
772	0	0	0	0	0	0	0	0	0	0	0	0	0	0	0	0	0	0	0	0	0	0	0	0	0	0	0	0	0	0	0	0	0	0	0	0	0	0	0	0	0	0	0	0	0	0	0	0	0
776	0	0	0	0	0	0	0	0	0	0	0	0	0	0	0	0	0	0	0	0	0	0	0	0	0	0	0	0	0	0	0	0	0	0	0	0	0	0	0	0	0	0	0	0	0	0	0	0	0
780	0	0	0	0	0	0	0	0	0	0	0	0	0	0	0	0	0	0	0	0	0	0	0	0	0	0	0.00159317	0.00311309	0.00463228	0.00689238	0.0102545	0.0152557	0.0226944	0.033758	0.0502114	0.0746789	0.111061	0.165155	0.245579	0.365137	0.381267	0.425095	0.473924	0.598759	0.721226	0.988381	1.22393	1.51548	1.8646
784	0	0	0	0	0	0	0	0	0	0	0	0	0	0	0	0	0	0	0	0	0	0	0	0	0	0	0	0	0	0	0	0	0	0	0	0	0	0	0	0	0	0	0	0	0	0	0	0	0
788	0	0	0	0	0	0	0	0	0	0	0	0	0	0	0	0	0	0	0	0	0	0	0	0	0	0	0	0	0	0	0	0	0	0	0	0	0	0	0	0	0	0	0	0	0	0	0	0	0
792	0	0	7.26207e-05	0.000161302	0.000358216	0.00167914	0.00418547	0.00870941	0.0257703	0.0571779	0.112745	0.180132	0.286008	0.39144	0.532401	0.718861	0.962279	1.55808	2.50103	4.06189	6.5356	7.02184	12.1646	20.5779	16.2202	17.0945	21.3892	22.2036	22.2833	22.424	22.564	22.7034	22.8421	22.98	23.1171	23.2534	23.3888	23.5232	23.6566	23.789	24.4694	25.0871	25.7184	26.3634	27.0223	27.359	27.6564	27.9546	28.4165
795	0	0	0.000367909	0.000635586	0.00109783	0.00189592	0.00327363	0.00565143	0.00975452	0.0168333	0.0290434	0.0458924	0.0724949	0.114483	0.180735	0.285233	0.449999	0.709694	1.11885	1.69712	2.57089	2.69676	2.8153	2.92651	3.05818	3.26287	3.72114	4.02513	4.26116	4.46161	4.67119	4.89029	5.11931	5.35869	5.60886	5.87029	6.14345	6.42885	6.727	7.03844	7.36372	7.70341	8.05812	8.42847	8.8151	9.21867	9.63988	10.0794	10.5989
796	0	0	0	0	0	0	0	0	0	0	0	0	0	0	0	0	0	0	0	0	0	0	0	0	0	0	0	0	0	0	0	0	0	0	0	0	0	0	0	0	0	0	0	0	0	0	0	0	0
798	0	0	0	0	0	0	0	0	0	0	0	0	0	0	0	0	0	0	0	0	0	0	0	0	0	0	0	0	0	0	0	0	0	0	0	0	0	0	0	0	0	0	0	0	0	0	0	0	0
800	0	0	0	0	0	0	0	0	0	0	0	0	0	0	0	0	0	0	0	0	0	0	0	0	0	0	0	0	0	0	0	0	0	0	0	0	0	0	0	0	0	0	0	0	0	0	0	0	0
804	0	0	0	0	0	0	0	0	0	0	0	0	0	0	0	0	0	0	0	0	0	0	0	0	0	0	0	0	0	0	0	0	0	0	0	0	0	0	0	0	0	0	0	0	0	0	0	0	0
807	0	0	0	0	0	0	0	0	0	0	0	0	0	0	0	0	0	0	0	0	0	0	0	0	0	0	0	0	0	0	0	0	0	0	0	0	0	0	0	0	0	0	0	0	0	0	0	0	0
818	0	0	0	0	0	0	0	0	9.75604	19.2411	56.9103	60.1503	63.2469	58.0939	53.0844	45.6119	38.3786	42.6827	46.7955	53.1322	59.1819	50.4481	45.4326	52.2594	44.0636	42.5631	52.0083	45.7315	44.3575	42.9998	41.6583	40.3331	39.0242	37.7315	36.4551	35.1949	33.951	32.7234	36.1461	39.5038	42.7965	46.0241	49.1867	43.4076	49.1536	55.6554	76.638	52.5	126.566
826	0	0	0	0	0	0	0	0	0	0	0	0	0	0	0	0	0	0	0	0	0	0	0	0	0	0	0	0	0	0	0	0	0	0	0	0	0	0	0	0	0	0	0	0	0	0	0	0	0
834	0	0	0.000143483	0.000279139	0.000547102	0.00108084	0.00215318	0.00432675	0.00877201	0.0179446	0.0370395	0.0649595	0.113895	0.199637	0.349828	0.612827	1.07321	1.87886	3.28819	5.6426	9.48149	14.8058	19.9027	24.7722	29.4142	18.6457	22.1325	25.4396	25.576	25.6627	25.761	25.8721	25.9975	26.1389	26.2985	26.4787	26.6824	26.9133	27.1757	27.475	27.8182	28.2141	28.6741	29.2139	29.8548	30.6274	31.5772	32.776	34.5442
840	0	0	0	0	0	0	0	0	0	0	0	0	0	0	0	0	0	0	0	0	0	0	0	0	0	0	0	3.81384e-06	1.12046e-05	2.94455e-05	7.27291e-05	0.000172665	0.000398805	0.000902682	0.00201175	0.00442877	0.00965305	0.0244685	0.0628177	0.161442	0.41786	1.07822	2.82221	7.49684	18.1517	46.6926	115.46	153.3	282.42
850	0	0	0	0	0	0	0	0	0	0	0	0	0	0	0	0	0	0	0	0	0	0	0	0	0	0	0	0	0	0	0	0	0	0	0	0	0	0	0	0	0	0	0	0	0	0	0	0	0
854	0	0	0.0001186	0.000263428	0.000585015	0.00129896	0.0028837	0.00640065	0.0142042	0.0315155	0.0699112	0.116852	0.195252	0.326156	0.544651	0.909223	1.51732	2.53123	4.22112	7.03657	11.7253	13.0202	14.452	16.0341	17.7812	19.7091	21.835	24.1775	24.0643	24.0911	24.126	24.1699	24.2239	24.2892	24.3673	24.4597	24.5686	24.6964	24.8461	25.0213	25.2268	25.4685	25.7541	26.0941	26.5025	26.9996	27.6152	28.3958	29.5896
858	0	0	0	0	0	0	0	0	0	0	0	0	0	0	0	0	0	0	0	0	0	0	0	0	0	0	0	7.49639e-09	1.56556e-08	3.26934e-08	6.82686e-08	1.42545e-07	2.97615e-07	6.21337e-07	1.29709e-06	2.70757e-06	5.65142e-06	1.17952e-05	2.4616e-05	5.13685e-05	0.000137468	0.000363307	0.000960092	0.00342347	0.0097977	0.0262626	0.0769301	0.203286	0.461542
860	0	0	0.000669067	0.00115586	0.00199648	0.00344787	0.00595332	0.0102775	0.0177393	0.0306126	0.0528175	0.0834586	0.131837	0.208196	0.328679	0.518716	0.818354	1.29063	2.03472	3.11901	4.77143	5.03865	5.29088	5.52811	5.75035	6.00526	6.70892	7.37403	7.7886	8.155	8.53808	8.93854	9.35715	9.79468	10.252	10.7298	11.2291	11.7508	12.2957	12.865	13.4595	14.0804	14.7288	15.4057	16.1124	16.85	17.6199	18.4233	19.3728
862	0	0	0	0	0	0	0	0	0	0	0	0	0	0	0	0	0	0	0	0	0	0	0	0	0	0	0	1.43715e-07	2.88739e-07	5.80072e-07	1.16528e-06	2.34071e-06	4.7015e-06	9.44268e-06	1.89637e-05	3.8082e-05	7.64689e-05	0.000153539	0.00030826	0.000750001	0.00182462	0.00443863	0.0107967	0.02626	0.0585429	0.130502	0.293694	0.595254	1.20092
876	0	0	0	0	0	0	0	0	0	0	0	0	0	0	0	0	0	0	0	0	0	0	0	0	0	0	0	0	0	0	0	0	0	0	0	0	0	0	0	0	0	0	0	0	0	0	0	0	0
882	0	0	0	0	0	0	0	0	0	0	0	0	0	0	0	0	0	0	0	0	0	0	0	0	0	0	0	0	0	0	0	0	0	0	0	0	0	0	0	0	0	0	0	0	0	0	0	0	0
887	0	0	0	0	0	0	0	0	0	0	0	0	0	0	0	0	0	0	0	0	0	0	0	0	0	0	0	0	0	0	0	0	0	0	0	0	0	0	0	0	0	0	0	0	0	0	0	0	0
891	0	0	0	0	0	0	0	0	0	0	0	0	0	0	0	0	0	0	0	0	0	0	0	0	0	0	0	0	0	0	0	0	0	0	0	0	0	0	0	0	0	0	0	0	0	0	0	0	0
894	0	0	0	0	0	0	0	0	0	0	0	0	0	0	0	0	0	0	0	0	0	0	0	0	0	0	0	0	0	0	0	0	0	0	0	0	0	0	0	0	0	0	0	0	0	0	0	0	0
[truncated: 108 more columns]

## Sheet: lower2
ISO1	y-10000	y-9000	y-8000	y-7000	y-6000	y-5000	y-4000	y-3000	y-2000	y-1000	y0	y100	y200	y300	y400	y500	y600	y700	y800	y900	y1000	y1100	y1200	y1300	y1400	y1500	y1600	y1700	y1710	y1720	y1730	y1740	y1750	y1760	y1770	y1780	y1790	y1800	y1810	y1820	y1830	y1840	y1850	y1860	y1870	y1880	y1890	y1900	y1910
4	0	0	0	0	0	0	0	0	0	0	0	0	0	0	0	0	0	0	0	0.0708729	0.311995	0.823319	1.81997	2.45696	4.82617	9.12584	19.7434	33.5638	35.5537	37.5311	39.5597	41.6399	43.772	45.9563	48.1931	50.4824	52.8244	55.219	57.666	60.1652	63.3569	68.1038	73.1445	78.4939	84.1671	91.5215	100.563	110.413	119.558
8	0	0	0	0	0	0	0	0	0	0	0	0	0	0	0	0	0	0	0	0	0.0325096	0.0541827	0.0758557	0.0975288	0.119202	0.140875	0.162548	0.276332	0.298321	0.321153	0.344825	0.369339	0.394694	0.42089	0.447927	0.475806	0.504526	0.534088	0.56449	0.595734	0.622321	0.677407	0.736884	0.833103	0.933117	1.05277	1.17695	1.32639	1.46196
12	0	0	0	0	0	0	0	0	0	0	0	0	0	0	0	0	0	0	0	0	0	0	0	0	0	0	0	0	0	0	0	0	0	0	0	0	0	0	0	0	0	0	0	0	0	0	0	0	0
16	0	0	0	0	0	0	0	0	0	0	0	0	0	0	0	0	0	0	0	0	0	0	0	0	0	0	0	0	0	0	0	0	0	0	0	0	0	0	0	0	0	0	0	0	0	0	0	0	0
20	0	0	0	0	0	0	0	0	0	0	0	0	0	0	0	0	0	0	0	0	0	0	0	0	0	0	0	0	0	0	0	0	0	0	0	0	0	0	0	0	0	0	0	0	0	0	0	0	0
24	0	0	0	0	0	0	0	0	0	0	0	0	0	0	0	0	0	0	0	0.0797906	0.441917	0.859284	1.37485	1.98863	2.83564	3.82995	4.69537	5.63444	2.78314	2.93048	3.08325	3.242	3.40733	3.57998	3.76078	3.95074	4.15103	4.36311	4.58873	4.83004	5.08979	5.37144	5.67956	6.02021	6.40178	6.8362	7.34127	7.94509	8.58214
28	0	0	0	0	0	0	0	0	0	0	0	0	0	0	0	0	0	0	0	0	0	0	0	0	0	0	0	0	0	0	0	0	0	0	0	0	0	0	0	0	0	0	0	0	0	0	0	0	0
31	0	0	0	0	0	0	0	0	0	0	0	0	0	0	0	0	0	0	0	0.000937805	0.00444727	0.0111182	0.0207539	0.0333545	0.0326133	0.0481788	0.066709	0.0882042	0.0597653	0.067236	0.0755367	0.084754	0.0949829	0.106328	0.118905	0.132839	0.148269	0.165349	0.184247	0.205145	0.228247	0.253774	0.281971	0.313106	0.347471	0.38539	0.427215	0.473335	0.517337
32	0	0	0	0	0	0	0	0	0	0	0	0	0	0	0	0	0	0	0	0	0	0	0	0	0	0	0	8.14396e-05	0.000169394	0.000351819	0.000729699	0.00151152	0.00312728	0.00646304	0.0133431	0.0275201	0.056708	0.116752	0.333846	0.43843	0.575358	0.754526	0.988837	1.2951	1.76892	2.59985	3.46748	4.9928	7.264
36	0	0	0	0	0	0	0	0	0	0	0	0	0	0	0	0	0	0	0	0	0	0	0	0	0	0	0	0	0	0	0	0	0	0	0	0	0	0.146634	0.138145	0.134949	0.150589	0.198662	0.378626	0.82129	1.25131	1.66295	2.35023	2.87535	3.43114
40	0	0	0	0	0	0	0	0	0	0	0	0	0	0	0	0	0	0	0	0	0	0	0	0	0	0	0	0	0	0	0	0	0	0	0	0	0	0	0	0	0	0	0	0	0	0	0	0	0
44	0	0	0	0	0	0	0	0	0	0	0	0	0	0	0	0	0	0	0	0	0	0	0	0	0	0	0	0	0	0	0	0	0	0	0	0	0	0	0	0	0	0	0	0	0	0	0	0	0
48	0	0	0	0	0	0	0	0	0	0	0	0	0	0	0	0	0	0	0	0	0	0	0	0	0	0	0	0	0	0	0	0	0	0	0	0	0	0	0	0	0	0	0	0	0	0	0	0	0
50	0	0	0	0	0	0	0	0	0	0	0	0	0	0	0	0	0	0	0	2.89473	9.55488	16.4301	23.6976	30.2534	41.5794	51.9018	77.2916	107.029	114.187	120.91	127.853	135.023	142.425	150.066	157.952	166.09	174.487	183.149	240.106	318.872	423.166	561.182	743.724	985.026	1315.18	1755	2435.45	2771.28	2858.58
51	0	0	0	0	0	0	0	0	0	0	0	0	0	0	0	0	0	0	0	0	0	0	0	0	0	0	0	0	0	0	0	0	0	0	0	0	0	0	0	0	0	0	0	0	0	0	0	0	0
52	0	0	0	0	0	0	0	0	0	0	0	0	0	0	0	0	0	0	0	0	0	0	0	0	0	0	0	0	0	0	0	0	0	0	0	0	0	0	0	0	0	0	0	0	0	0	0	0	0
56	0	0	0	0	0	0	0	0	0	0	0	0	0	0	0	0	0	0	0	0	0	0	0	0	0	0	0	0	0	0	0	0	0	0	0	0	0	0	0	0	0	0	0	0	0	0	0	0	0
60	0	0	0	0	0	0	0	0	0	0	0	0	0	0	0	0	0	0	0	0	0	0	0	0	0	0	0	0	0	0	0	0	0	0	0	0	0	0	0	0	0	0	0	0	0	0	0	0	0
64	0	0	0	0	0	0	0	0	0	0	0	0	0	0	0	0	0	0	0	0.00400872	0.0120262	0.0200436	0.0280611	0.0396863	0.0529151	0.0781701	0.120262	0.170371	0.193531	0.204696	0.216208	0.228077	0.240311	0.25292	0.265913	0.279301	0.293094	0.307302	0.402419	0.561953	0.784158	1.09347	1.52379	2.12212	3.01928	4.29329	6.10157	7.15497	7.64675
68	0	0	0	0	0	0	0	0	0	0	0	0	0	0	0	0	0	0	0	0	0	0	0	0	0	0	0	0.0013848	0.00293526	0.00621243	0.0131305	0.0277169	0.0584376	0.123071	0.258923	0.5442	1.14274	2.39752	5.02597	6.13292	7.47821	7.77257	8.07194	9.87825	8.70048	7.45514	12.4434	11.1256	12.9302
70	0	0	0	0	0	0	0	0	0	0	0	0	0	0	0	0	0	0	0	0	0	0	0	0	0	0	0	0	0	0	0	0	0	0	0	0	0	0	0	0	0	0	0	0	0	0	0	0	0
72	0	0	0	0	0	0	0	0	0	0	0	0	0	0	0	0	0	0	0	0	0	0	0	0	0	0	0	0	0	0	0	0	0	0	0	0	0	0	0	0	0	0	0	0	0	0	0	0	0
76	0	0	0	0	0	0	0	0	0	0	0	0	0	0	0	0	0	0	0	0	0	0	0	0	0	0	0	1.90943e-06	4.56886e-06	1.09727e-05	2.64553e-05	6.40437e-05	0.000155684	0.000380041	0.000931593	0.00229298	0.00566632	0.0140559	0.0370245	0.0934659	0.243801	0.607489	1.4674	3.4658	8.04933	18.3357	46.6121	115.524	293.834
84	0	0	0	0	0	0	0	0	0	0	0	0	0	0	0	0	0	0	0	0	0	0	0	0	0	0	0	1.62196e-09	3.65022e-09	8.20263e-09	1.84074e-08	4.12549e-08	9.23513e-08	2.06504e-07	4.61275e-07	1.02936e-06	2.29497e-06	5.11223e-06	1.13786e-05	2.4169e-05	5.12992e-05	0.000108808	0.000230637	0.000488565	0.00112608	0.00259401	0.00597226	0.013743	0.0311966
86	0	0	0	0	0	0	0	0	0	0	0	0	0	0	0	0	0	0	0	0	0	0	0	0	0	0	0	0	0	0	0	0	0	0	0	0	0	0	0	0	0	0	0	0	0	0	0	0	0
90	0	0	0	0	0	0	0	0	0	0	0	0	0	0	0	0	0	0	0	3.05537e-06	2.06238e-05	7.73392e-05	0.000243618	0.000704753	0.00193807	0.00515351	0.0133793	0.0341172	0.0437764	0.0560572	0.0716432	0.0913883	0.116356	0.147869	0.187565	0.237465	0.300056	0.378378	0.476134	0.504805	0.533901	0.563168	0.592272	0.620771	0.635144	0.646798	0.654866	0.658156	0.646419
92	0	0	0	0	0	0	0	0	0	0	0	0	0	0	0	0	0	0	0	0	0	0	0	0	0	0	0	0	0	0	0	0	0	0	0	0	0	0	0	0	0	0	0	0	0	0	0	0	0
96	0	0	0	0	0	0	0	0	0	0	0	0	0	0	0	0	0	0	0	8.45214e-05	0.000380346	0.00114104	0.00399364	0.00847221	0.0169444	0.0250315	0.0541548	0.110476	0.11897	0.134489	0.151822	0.171167	0.192745	0.216799	0.243597	0.273437	0.306646	0.343584	0.384653	0.415193	0.447824	0.482677	0.519892	0.559617	0.58358	0.608214	0.663168	0.71976	0.767826
100	0	0	0	0	0	0	0	0	0	0	0	0	0	0	0	0	0	0	0	0	0.0931814	0.168891	0.252755	0.34943	0.234895	0.403786	0.72798	0.825044	0.887137	0.965127	1.04853	1.13769	1.23297	1.33474	1.4434	1.55939	1.68315	1.81516	1.95593	2.10606	2.23178	2.41106	2.60304	2.71466	2.82861	3.37563	3.96238	3.86315	4.55714
104	0	0	0	0	0	0	0	0	0	0	0	0	0	0	0	0	0	0	0	0.150212	0.472229	0.979386	1.63793	2.02648	2.93311	4.00061	5.1692	6.47927	6.87002	7.27076	7.68147	8.10215	8.53278	8.97334	9.42382	9.8842	10.3545	10.8346	11.8816	12.9688	13.2152	136.872	266.733	402.792	545.037	693.462	1005.96	1998.9	2346.05
108	0	0	0	0	0	0	0	0	0	0	0	0	0	0	0	0	0	0	0	8.03122e-05	0.000433686	0.00131913	0.00326348	0.00724526	0.0150272	0.0297312	0.0566036	0.104974	0.110969	0.116629	0.122472	0.128516	0.134781	0.141289	0.148068	0.15515	0.162572	0.17038	0.178629	0.187388	0.196741	0.206798	0.217699	0.22963	0.242849	0.257718	0.274772	0.294852	0.315203
112	0	0	0	0	0	0	0	0	0	0	0	0	0	0	0	0	0	0	0	0	0	0	0	0	0	0	0	0	0	0	0	0	0	0	0	0	0	0	0	0	0	0	0	0	0	0	0	0	0
116	0	0	0	0	0	0	0	0	0	0	0	0	0	0	0	0	0	0	0	6.10787	19.2016	35.0447	53.2809	73.8759	96.795	122.004	155.54	192.851	202.846	213.013	223.354	233.867	244.552	255.41	266.439	277.64	289.013	300.556	312.27	324.155	339.097	356.141	373.795	392.079	411.012	448.645	491.64	538.476	581.794
120	0	0	0	0	0	0	0	0	0	0	0	0	0	0	0	0	0	0	0	0.0167083	0.0859286	0.163673	0.261878	0.3848	0.537498	0.725971	0.957325	1.23996	1.27965	1.34173	1.40548	1.47105	1.53863	1.60841	1.68064	1.7556	1.8336	1.91506	2.00045	2.09036	2.18552	2.28687	2.3956	2.51329	2.64211	2.78509	2.94668	3.13378	3.31408
124	0	0	0	0	0	0	0	0	0	0	0	0	0	0	0	0	0	0	0	0	0	0	0	0	0	0	0	0	0	0	0	0	0	0	0	0	0	0	0	0	0	0	0	0	0	0	0	0	0
132	0	0	0	0	0	0	0	0	0	0	0	0	0	0	0	0	0	0	0	0	0	0	0	0	0	0	0	0	0	0	0	0	0	0	0	0	0	0	0	0	0	0	0	0	0	0	0	0	0
136	0	0	0	0	0	0	0	0	0	0	0	0	0	0	0	0	0	0	0	0	0	0	0	0	0	0	0	0	0	0	0	0	0	0	0	0	0	0	0	0	0	0	0	0	0	0	0	0	0
140	0	0	0	0	0	0	0	0	0	0	0	0	0	0	0	0	0	0	0	0.00946335	0.0448264	0.0786428	0.115895	0.15685	0.201795	0.251037	0.304903	0.363744	0.379559	0.399991	0.421215	0.443311	0.466371	0.4905	0.515825	0.542493	0.570681	0.600604	0.632523	0.666762	0.703729	0.743947	0.788098	0.837099	0.892214	0.955249	1.02891	1.11748	1.21227
144	0	0	0	0	0	0	0	0	0	0	0	0	0	0	0	0	0	0	0	0.37204	1.1852	2.21225	3.42573	4.25298	4.96101	6.27543	9.00945	12.1962	12.7476	12.9723	13.1828	13.3797	13.5634	13.7343	13.8928	14.0395	14.1747	14.2989	14.4123	14.5154	17.4298	22.3502	28.6407	33.1085	37.7556	38.273	122.636	157.139	160.21
148	0	0	0	0	0	0	0	0	0	0	0	0	0	0	0	0	0	0	0	0.0128695	0.0609607	0.163832	0.36805	0.777085	1.58747	3.00898	6.07583	11.8045	12.5177	12.9337	13.3429	13.7447	14.1389	14.525	14.9025	15.271	15.6297	15.9782	16.3157	16.6414	16.9545	17.2541	17.5393	17.809	18.0625	18.2992	18.5194	18.7253	18.6771
152	0	0	0	0	0	0	0	0	0	0	0	0	0	0	0	0	0	0	0	0	0	0	0	0	0	0	0	7.02456e-08	1.49956e-07	3.19643e-07	6.80409e-07	1.44651e-06	3.07154e-06	6.51489e-06	1.3804e-05	2.92201e-05	6.17956e-05	0.000130574	0.000275678	0.00062601	0.0014205	0.00322109	0.00817233	0.0210586	0.05085	0.121151	0.281053	0.645571	1.50401
156	0	0	0	0	0	0	0	0	0	0	0	0	0	0	0	0	0	0	0	21.9114	60.7776	248.657	396.281	393.744	427.057	643.837	794.961	909.859	989.788	1180.03	1300.58	1515.23	1954.31	2230.53	2571.17	3319.34	3704.26	3725.89	4485.61	4753.77	5373.68	5832.02	6245.65	6290.37	5465.41	5658.88	5969.48	6501.6	6933.67
158	0	0	0	0	0	0	0	0	0	0	0	0	0	0	0	0	0	0	0	0.0873203	0.270088	0.556263	0.934566	1.41105	1.99162	2.68207	3.17094	18.396	21.8147	23.9009	26.1504	28.575	31.1871	33.9998	37.0273	40.2847	43.7882	47.5547	51.6027	55.9517	59.1974	62.9892	66.9792	71.0717	75.2923	79.8061	84.4577	99.1681	265.656
162	0	0	0	0	0	0	0	0	0	0	0	0	0	0	0	0	0	0	0	0	0	0	0	0	0	0	0	0	0	0	0	0	0	0	0	0	0	0	0	0	0	0	0	0	0	0	0	0	0
166	0	0	0	0	0	0	0	0	0	0	0	0	0	0	0	0	0	0	0	0	0	0	0	0	0	0	0	0	0	0	0	0	0	0	0	0	0	0	0	0	0	0	0	0	0	0	0	0	0
170	0	0	0	0	0	0	0	0	0	0	0	0	0	0	0	0	0	0	0	0	0	0	0	0	0	0	0	8.82914e-08	1.96501e-07	4.34817e-07	9.5722e-07	2.09752e-06	4.57702e-06	9.94966e-06	2.15538e-05	4.65432e-05	0.000100211	0.000215177	0.000417587	0.000806858	0.00197069	0.00485413	0.0119486	0.0264341	0.0581311	0.143339	0.343093	0.832805	2.05534
174	0	0	0	0	0	0	0	0	0	0	0	0	0	0	0	0	0	0	0	0.000245992	0.00221393	0.00664178	0.0162724	0.0358656	0.0739728	0.145704	0.315225	0.643059	0.664598	0.738535	0.819568	0.908327	1.0055	1.11182	1.2281	1.35521	1.4941	1.64578	1.81138	1.99209	2.18922	2.40417	2.63849	2.89381	3.17194	3.47481	3.80452	4.16334	4.49433
175	0	0	0	0	0	0	0	0	0	0	0	0	0	0	0	0	0	0	0	0	0	0	0	0	0	0	0	0	0	0	0	0	0	0	0	0	0	0	0	0	0	0	0	0	0	0	0	0	0
178	0	0	0	0	0	0	0	0	0	0	0	0	0	0	0	0	0	0	0	0.00277836	0.0142887	0.0408249	0.0979799	0.215956	0.452478	0.916709	1.81327	3.52293	3.63506	3.75901	3.88123	4.00162	4.12006	4.23644	4.35061	4.46241	4.57169	4.67822	4.7818	4.88216	4.97903	5.07205	5.16085	5.245	5.324	5.39733	5.46447	5.52506	5.50661
180	0	0	0	0	0	0	0	0	0	0	0	0	0	0	0	0	0	0	0	0.297162	1.48581	2.88908	4.62253	6.68615	9.53396	12.877	15.7867	18.9441	19.8574	20.7542	21.6678	22.5997	23.5516	24.5253	25.5231	26.5476	27.6019	28.6895	29.815	30.9837	32.2022	33.4788	34.8243	36.2527	37.7827	39.4408	41.2649	43.3134	45.0856
184	0	0	0	0	0	0	0	0	0	0	0	0	0	0	0	0	0	0	0	0	0	0	0	0	0	0	0	0	0	0	0	0	0	0	0	0	0	0	0	0	0	0	0	0	0	0	0	0	0
188	0	0	0	0	0	0	0	0	0	0	0	0	0	0	0	0	0	0	0	0	0	0	0	0	0	0	0	1.95637e-07	4.40279e-07	9.89379e-07	2.22025e-06	4.97605e-06	1.11392e-05	2.49079e-05	5.56377e-05	0.000124159	0.000276813	0.000616623	0.00141739	0.00325362	0.00789447	0.0193925	0.0465211	0.109464	0.283884	0.745313	1.86097	4.89013	2.724
191	0	0	0	0	0	0	0	0	0	0	0	0	0	0	0	0	0	0	0	0	0	0	0	0	0	0	0	0	0	0	0	0	0	0	0	0	0	0	0	0	0	0	0	0	0	0	0	0	0
192	0	0	0	0	0	0	0	0	0	0	0	0	0	0	0	0	0	0	0	0	0	0	0	0	0	0	0	6.3961e-08	1.54601e-07	3.73136e-07	8.99343e-07	2.16486e-06	5.20495e-06	1.25003e-05	2.99898e-05	7.18788e-05	0.000172119	0.000411797	0.000984423	0.0023515	0.00605991	0.0155484	0.0398678	0.0867251	0.187917	0.411713	0.90276	1.97845	5.2495
196	0	0	0	0	0	0	0	0	0	0	0	0	0	0	0	0	0	0	0	0	0	0	0	0	0	0	0	0	0	0	0	0	0	0	0	0	0	0	0	0	0	0	0	0	0	0	0	0	0
203	0	0	0	0	0	0	0	0	0	0	0	0	0	0	0	0	0	0	0	0	0	0	0	0	0	0	0	0	0	0	0	0	0	0	0	0	0	0	0	0	0	0	0	0	0	0	0	0	0
204	0	0	0	0	0	0	0	0	0	0	0	0	0	0	0	0	0	0	0	0.0258324	0.132852	0.253052	0.404883	0.59493	0.818029	1.07418	1.28075	1.39376	1.33801	1.28259	1.22778	1.17381	1.12088	1.06915	1.01874	0.969764	0.922293	0.876387	0.832086	0.80175	0.771955	0.742753	0.714186	0.686288	0.717374	0.749443	0.782522	0.81664	0.840713
208	0	0	0	0	0	0	0	0	0	0	0	0	0	0	0	0	0	0	0	0	0	0	0	0	0	0	0	0	0	0	0	0	0	0	0	0	0	0	0	0	0	0	0	0	0	0	0	0	0
212	0	0	0	0	0	0	0	0	0	0	0	0	0	0	0	0	0	0	0	0	0	0	0	0	0	0	0	0	0	0	0	0	0	0	0	0	0	0	0	0	0	0	0	0	0	0	0	0	0
214	0	0	0	0	0	0	0	0	0	0	0	0	0	0	0	0	0	0	0	0	0	0	0	0	0	0	0	1.23708	1.32916	1.42568	1.52677	1.63258	1.74321	1.85878	1.97942	2.10522	2.23627	2.37264	2.51439	2.73762	2.97729	3.23431	3.5096	3.80405	5.0452	6.68361	8.88942	11.7336	14.7051
218	0	0	0	0	0	0	0	0	0	0	0	0	0	0	0	0	0	0	0	0	0	0	0	0	0	0	0	7.93101e-08	1.64983e-07	3.42696e-07	7.10855e-07	1.47265e-06	3.0472e-06	6.29824e-06	1.30043e-05	2.68243e-05	5.52804e-05	0.000113825	0.000234181	0.000481425	0.0012356	0.00289855	0.00679513	0.0156115	0.0354296	0.0828607	0.186533	0.419699	0.978122
222	0	0	0	0	0	0	0	0	0	0	0	0	0	0	0	0	0	0	0	0	0	0	0	0	0	0	0.14149	0.174934	0.183961	0.193741	0.204578	0.216915	0.231401	0.248994	0.271111	0.328563	0.388983	0.452372	0.51873	0.588056	0.699737	0.81646	0.938224	1.12721	1.32428	1.62376	1.9357	2.2601	2.91578
226	0	0	0	0	0	0	0	0	0	0	0	0	0	0	0	0	0	0	0	0	0	0	0	0	0	0	0	0	0	0	0	0	0	0	0	0	0	0	0	0	0	0	0	0	0	0	0	0	0
231	0	0	0	0	0	0	0	0	0	0	0	0	0	0	0	0	0	0	0	0	0	0	0	0	0	0	0	0	0	0	0	0	0	0	0	0	0	0	0	0	0	0	0	0	0	0	0	0	0
232	0	0	0	0	0	0	0	0	0	0	0	0	0	0	0	0	0	0	0	0	0	0	0	0	0	0	0	0	0	0	0	0	0	0	0	0	0	0	0	0	0	0	0	0	0	0	0	0	0
233	0	0	0	0	0	0	0	0	0	0	0	0	0	0	0	0	0	0	0	0	0	0	0	0	0	0	0	0	0	0	0	0	0	0	0	0	0	0	0	0	0	0	0	0	0	0	0	0	0
234	0	0	0	0	0	0	0	0	0	0	0	0	0	0	0	0	0	0	0	0	0	0	0	0	0	0	0	0	0	0	0	0	0	0	0	0	0	0	0	0	0	0	0	0	0	0	0	0	0
238	0	0	0	0	0	0	0	0	0	0	0	0	0	0	0	0	0	0	0	0	0	0	0	0	0	0	0	0	0	0	0	0	0	0	0	0	0	0	0	0	0	0	0	0	0	0	0	0	0
242	0	0	0	0	0	0	0	0	0	0	0	0	0	0	0	0	0	0	0	0	0	0	0	0	0	0	0	0	0	0	0	0	0	0	0	0	0	0	0	0	0	0	0	0	0	0	0	0	3.632
246	0	0	0	0	0	0	0	0	0	0	0	0	0	0	0	0	0	0	0	0	0	0	0	0	0	0	0	0	0	0	0	0	0	0	0	0	0	0	0	0	0	0	0	0	0	0	0	0	0
250	0	0	0	0	0	0	0	0	0	0	0	0	0	0	0	0	0	0	0	0	0.273763	0.814621	1.54125	3.02306	2.55511	4.10719	5.83784	7.94482	8.4882	9.04893	9.62702	10.2225	10.8353	11.4546	12.0906	12.7433	13.4127	14.0987	15.5344	16.8927	18.0474	19.4535	20.8965	21.9076	22.8169	24.1296	25.2854	26.3481	27.0811
254	0	0	0	0	0	0	0	0	0	0	0	0	0	0	0	0	0	0	0	0	0	0	0	0	0	0	0	0.0193134	0.0220356	0.0250918	0.028517	0.0323492	0.0366291	0.0413999	0.046707	0.0525977	0.0591207	0.0663245	0.0742565	0.0829607	0.0924746	0.102825	0.114023	0.126054	0.138866	0.152351	0.166318	0.18045	0.191694
258	0	0	0	0	0	0	0	0	0	0	0	0	0	0	0	0	0	0	0	0	0	0	0	0	0	0	0	0	0	0	0	0	0	0	0	0	0	0	0	0	0	0	0	0	0	0	0	0	0
262	0	0	0	0	0	0	0	0	0	0	0	0	0	0	0	0	0	0	0	0	0	0	0	0	0	0	0	0	0	0	0	0	0	0	0	0	0	0	0	0	0	0	0	0	0	0	0	0	0
266	0	0	0	0	0	0	0	0	0	0	0	0	0	0	0	0	0	0	0	0.00158217	0.00813687	0.0232482	0.0557957	0.122978	0.257669	0.52203	1.03259	2.00617	2.10134	2.17259	2.24277	2.31183	2.37968	2.44624	2.51143	2.57513	2.63722	2.69757	2.75602	2.81237	2.86642	2.9179	2.9665	3.01185	3.05349	3.09085	3.12322	3.14973	3.12802
268	0	0	0	0	0	0	0	0	0	0	0	0	0	0	0	0	0	0	0	0	0	0	0	0	0	0	0	0	0	0	0	0	0	0	0	0	0	0	0	0	0	0	0	0	0	0	0	0	0
270	0	0	0	0	0	0	0	0	0	0	0	0	0	0	0	0	0	0	0	0.000131316	0.000675337	0.00192954	0.00463089	0.0102068	0.0213858	0.043327	0.0857018	0.166506	0.156357	0.146608	0.137279	0.12838	0.119915	0.111883	0.104281	0.0971007	0.0903316	0.0839617	0.0779772	0.120217	0.185201	0.285117	0.438648	0.674431	1.03634	1.59154	2.44287	3.74764	5.67151
275	0	0	0	0	0	0	0	0	0	0	0	0	0	0	0	0	0	0	0	0	0	0	0	0	0	0	0	0	0	0	0	0	0	0	0	0	0	0	0	0	0	0	0	0	0	0	0	0	0
276	0	0	0	0	0	0	0	0	0	0	0	0	0	0	0	0	0	0	0	0	0	0	0	0	0	0	0	0	0	0	0	0	0	0	0	0	0	0	0	0	0	0	0	0	0	0	0	0	0
288	0	0	0	0	0	0	0	0	0	0	0	0	0	0	0	0	0	0	0	0.0185346	0.095321	0.272346	0.65363	1.44065	3.01851	6.11543	12.0964	23.5017	24.3212	25.1272	25.9191	26.6959	27.4567	28.2004	28.9257	29.6315	30.316	30.9775	31.6141	32.2232	32.8023	33.348	33.8565	34.3231	34.7421	35.1068	35.4087	35.6378	35.3158
292	0	0	0	0	0	0	0	0	0	0	0	0	0	0	0	0	0	0	0	0	0	0	0	0	0	0	0	0	0	0	0	0	0	0	0	0	0	0	0	0	0	0	0	0	0	0	0	0	0
296	0	0	0	0	0	0	0	0	0	0	0	0	0	0	0	0	0	0	0	0	0	0	0	0	0	0	0	0	0	0	0	0	0	0	0	0	0	0	0	0	0	0	0	0	0	0	0	0	0
300	0	0	0	0	0	0	0	0	0	0	0	0	0	0	0	0	0	0	0	0	0.156152	0.421611	0.639443	0.878356	0.772953	1.01499	1.75671	1.99094	2.16398	2.34421	2.53163	2.72623	2.92801	3.13698	3.35313	3.57647	3.807	4.04471	4.2896	4.54168	5.11231	5.75	6.46445	7.26168	8.15457	9.24364	10.4701	11.8549	12.8231
304	0	0	0	0	0	0	0	0	0	0	0	0	0	0	0	0	0	0	0	0	0	0	0	0	0	0	0	0	0	0	0	0	0	0	0	0	0	0	0	0	0	0	0	0	0	0	0	0	0
308	0	0	0	0	0	0	0	0	0	0	0	0	0	0	0	0	0	0	0	0	0	0	0	0	0	0	0	0	0	0	0	0	0	0	0	0	0	0	0	0	0	0	0	0	0	0	0	0	0
312	0	0	0	0	0	0	0	0	0	0	0	0	0	0	0	0	0	0	0	0	0	0	0	0	0	0	0	0	0	0	0	0	0	0	0	0	0	0	0	0	0	0	0	0	0	0	0	0	0
316	0	0	0	0	0	0	0	0	0	0	0	0	0	0	0	0	0	0	0	0	0	0	0	0	0	0	0	0	0	0	0	0	0	0	0	0	0	0	0	0	0	0	0	0	0	0	0	0	0
320	0	0	0	0	0	0	0	0	0	0	0	0	0	0	0	0	0	0	0	0	0	0	0	0	0	0	0	0.000369031	0.000757281	0.0015517	0.00317515	0.00648881	0.0132449	0.0270054	0.0550048	0.111925	0.227537	0.46217	0.937988	0.951371	1.10319	1.27411	1.47054	1.71171	1.96298	2.18385	2.35291	2.53375	2.83432
324	0	0	0	0	0	0	0	0	0	0	0	0	0	0	0	0	0	0	0	0.0191793	0.0986365	0.281819	0.676364	1.49076	3.1235	6.32813	12.5172	24.3191	25.4595	26.6228	27.811	29.0265	30.2723	31.5513	32.8675	34.2251	35.6294	37.0866	38.6041	40.1913	41.8596	43.6235	45.5015	47.5185	49.7076	52.1159	54.8116	57.9005	60.7544
328	0	0	0	0	0	0	0	0	0	0	0	0	0	0	0	0	0	0	0	0	0	0	0	0	0	0	0	1.38771e-07	3.02388e-07	6.57943e-07	1.4296e-06	3.10234e-06	6.72428e-06	1.45586e-05	3.14877e-05	6.8036e-05	0.000146871	0.000316781	0.000682696	0.00147718	0.0031939	0.00690095	0.0149008	0.0321544	0.0713672	0.15831	0.350983	0.777746	1.7001
332	0	0	0	0	0	0	0	0	0	0	0	0	0	0	0	0	0	0	0	0	0	0	0	0	0	0	0	0.000620919	0.00100899	0.00163719	0.00265285	0.00429312	0.00693931	0.0112041	0.0180711	0.0291185	0.0468763	0.0753985	0.121176	0.194597	0.282336	0.38808	0.533076	0.760188	1.07224	1.46243	2.11036	3.04378	4.45124
334	0	0	0	0	0	0	0	0	0	0	0	0	0	0	0	0	0	0	0	0	0	0	0	0	0	0	0	0	0	0	0	0	0	0	0	0	0	0	0	0	0	0	0	0	0	0	0	0	0
336	0	0	0	0	0	0	0	0	0	0	0	0	0	0	0	0	0	0	0	0	0	0	0	0	0	0	0	0	0	0	0	0	0	0	0	0	0	0	0	0	0	0	0	0	0	0	0	0	0
340	0	0	0	0	0	0	0	0	0	0	0	0	0	0	0	0	0	0	0	0	0	0	0	0	0	0	0	6.07211e-09	1.30655e-08	2.80718e-08	6.02307e-08	1.29066e-07	2.76241e-07	5.90583e-07	1.26131e-06	2.69116e-06	5.73665e-06	1.2218e-05	2.60009e-05	5.52892e-05	0.000216318	0.000518025	0.00123972	0.00282949	0.00624292	0.0137664	0.0303404	0.0668337	0.145229
0	0	0	0	0	0	0	0	0	0	0	0	0	0	0	0	0	0	0	0	0	0	0	0	0	0	0	0	0	0	0	0	0	0	0	0	0	0	0	0	0	0	0	0	0	0	0	0	0	0
348	0	0	0	0	0	0	0	0	0	0	0	0	0	0	0	0	0	0	0	0	0.0973955	0.194791	0.36361	0.730466	0.714234	1.05512	1.21744	1.65572	1.90782	2.17421	2.45489	2.74988	3.05916	3.38274	3.72062	4.07279	4.43926	4.82003	5.2151	5.62446	6.52744	7.46994	8.14799	8.74214	9.45548	10.3975	11.4798	12.9786	14.2683
352	0	0	0	0	0	0	0	0	0	0	0	0	0	0	0	0	0	0	0	0	0	0	0	0	0	0	0	0	0	0	0	0	0	0	0	0	0	0	0	0	0	0	0	0	0	0	0	0	0
356	0	0	0	0	0	0	0	0	0	0	0	0	0	0	0	0	0	0	0	27.4493	84.8061	145.398	209.174	276.084	346.076	419.1	495.104	682.641	725.386	769.303	814.392	860.649	908.074	956.664	1006.42	1057.34	1109.41	1162.65	1521.3	1950.37	2636.97	3318.76	4654.04	6268.49	8417.54	10817.9	15036.2	16138	14399.6
360	0	0	0	0	0	0	0	0	0	0	0	0	0	0	0	0	0	0	0	1.95825	6.13472	11.3095	17.3379	24.2077	37.5517	53.7042	67.6504	85.2943	89.5982	93.9698	98.4091	102.916	107.49	116.572	126.004	135.785	145.914	156.391	169.789	183.673	198.045	212.902	228.245	298.148	371.121	447.159	526.259	608.415	1353.92
364	0	0	0	0	0	0	0	0	0	0	0	0	0	0	0	0	0	0	0	0.110643	0.52105	1.37499	3.03946	4.10327	8.05999	15.2407	32.9727	56.0536	60.1237	63.0658	66.0368	69.0324	72.0477	75.0771	78.1142	81.1519	84.1821	87.1953	90.1812	93.1277	99.351	105.517	111.589	117.527	123.286	142.281	160.945	174.694	185.361
368	0	0	0	0	0	0	0	0	0	0	0	0	0	0	0	0	0	0	0	0.147118	0.588472	0.858188	0.944007	0.882707	1.07886	1.27502	1.83897	1.66734	1.73432	1.80133	1.86837	1.93542	2.0025	2.0696	2.13672	2.20387	2.27103	2.33822	2.53161	2.73888	2.96095	3.19881	3.4535	3.72615	4.36232	5.10421	5.96905	6.97681	8.04437
372	0	0	0	0	0	0	0	0	0	0	0	0	0	0	0	0	0	0	0	0	0	0	0	0	0	0	0	0	0	0	0	0	0	0	0	0	0	0	0	0	0	0	0	0	0	0	0	0	0
376	0	0	0	0	0	0	0	0	0	0	0	0	0	0	0	0	0	0	0	0	0	0	0	0	0	0	0	0	0	0	0	0	0	0	0	0	0	0	0	0	0	0	0	0	0	0	0	0	0
380	0	0	0	0	0	0	0	0	0	0	0	0	0	0	0	0	0	0	0	0	0.761523	2.37976	4.35679	8.23763	6.44366	8.56714	14.5784	16.7811	17.9892	19.3252	20.7321	22.2129	23.7713	25.4107	27.1349	28.9478	30.8534	32.8561	34.9601	37.1703	40.7046	44.5449	48.7164	53.2435	55.8416	60.6724	169.84	146.7	130.752
384	0	0	0	0	0	0	0	0	0	0	0	0	0	0	0	0	0	0	0	0.0304367	0.156532	0.447233	1.07336	2.36577	4.95685	10.0425	19.8642	38.5933	40.3995	42.2396	44.1165	46.0336	47.9945	50.0036	52.066	54.1875	56.375	58.6369	60.9832	63.4261	65.9806	68.6658	71.5061	74.5337	77.7918	81.3409	85.2687	89.71	93.6483
388	0	0	0	0	0	0	0	0	0	0	0	0	0	0	0	0	0	0	0	0	0	0	0	0	0	0	0	2.12043e-09	5.14558e-09	1.24681e-08	3.01698e-08	7.29104e-08	1.75991e-07	4.24333e-07	1.02205e-06	2.45931e-06	5.91227e-06	1.42011e-05	3.40825e-05	7.1952e-05	0.000151788	0.000319985	0.000674119	0.00141929	0.00329553	0.00764773	0.017738	0.0411199	0.0940335
392	0	0	0	0	0	0	0	0	0	0	0	0	0	0	0	0	0	0	0	17.0152	46.1226	76.2892	105.426	147.027	216.118	315.697	463.589	741.86	827.511	848.198	867.781	886.209	903.429	913.039	921.111	927.599	932.448	935.599	970.683	1004.37	1036.35	1066.28	1093.77	1131.08	1164.79	1237.36	1540.02	1620.5	1704.05
398	0	0	0	0	0	0	0	0	0	0	0	0	0	0	0	0	0	0	0	0.0300984	0.138453	0.235771	0.337102	0.48308	0.662165	0.873858	1.15126	1.4668	1.51096	1.55401	1.59594	1.63675	1.67645	1.71503	1.7525	1.78885	1.82408	1.8582	1.8912	1.92309	1.95386	1.98351	2.01205	2.03947	2.06578	2.72183	3.28932	4.56397	5.8151
400	0	0	0	0	0	0	0	0	0	0	0	0	0	0	0	0	0	0	0	0	0	0	0	0	0	0	0	0	0	0	0	0	0	0	0	0	0	0	0	0	0	0	0	0	0	0	0	0	0
404	0	0	0	0	0	0	0	0	0	0	0	0	0	0	0	0	0	0	0	0	0	0	0	0	0	0	0	0.452601	0.556691	0.667395	0.784713	0.908646	1.01845	1.0668	1.11709	1.16954	1.22443	1.28208	1.34288	1.40733	1.47602	1.54973	1.62946	1.71655	1.8128	1.92078	2.04431	2.18928	2.33483
408	0	0	0	0	0	0	0	0	0	0	0	0	0	0	0	0	0	0	0	0.701706	2.30117	4.52713	8.31118	7.88075	11.0481	14.6682	20.7924	28.9441	33.0061	36.016	39.2463	42.7117	46.4277	50.4109	54.6787	59.2498	64.144	69.3822	74.9868	80.9815	84.4826	86.9858	89.5041	92.0377	94.5864	97.0996	100.181	103.307	105.088
410	0	0	0	0	0	0	0	0	0	0	0	0	0	0	0	0	0	0	0	1.61464	5.32053	10.5185	19.4072	18.496	26.0647	34.7889	49.5806	69.4	79.2703	88.0927	97.7627	108.356	119.953	132.645	146.527	161.703	178.287	196.402	216.18	237.767	246.8	253.494	260.198	269.281	278.482	286.152	293.867	301.643	650.159
414	0	0	0	0	0	0	0	0	0	0	0	0	0	0	0	0	0	0	0	0	0	0	0	0	0	0	0	0	0	0	0	0	0	0	0	0	0	0	0	0	0	0	0	0	0	0	0	0	0
417	0	0	0	0	0	0	0	0	0	0	0	0	0	0	0	0	0	0	0	0.00319052	0.0149556	0.02692	0.0404798	0.0556348	0.072385	0.0907305	0.119645	0.152547	0.167582	0.183696	0.201082	0.219834	0.240049	0.261831	0.285293	0.310553	0.337739	0.366988	0.398444	0.432263	0.468609	0.50766	0.549603	0.59464	0.642985	0.694866	0.750527	0.810228	0.862843
418	0	0	0	0	0	0	0	0	0	0	0	0	0	0	0	0	0	0	0	0.0241734	0.0829272	0.155396	0.241387	0.340707	0.453162	0.578561	0.830623	1.12443	1.18834	1.25369	1.32048	1.3887	1.45836	1.52944	1.60195	1.67589	1.75125	1.82803	2.09417	2.37199	46.8696	52.1725	57.6802	63.3923	69.3086	75.4288	113.689	233.855	260.769
422	0	0	0	0	0	0	0	0	0	0	0	0	0	0	0	0	0	0	0	0	0	0	0	0	0	0	0	0	0	0	0	0	0	0	0	0	0	0	0	0	0	0	0	0	0	0	0	0	0
426	0	0	0	0	0	0	0	0	0	0	0	0	0	0	0	0	0	0	0	0	0	0	0	0	0	0	0	0	0	0	0	0	0	0	0	0	0	0	0	0	0	0	0	0	0	0	0	0	0
428	0	0	0	0	0	0	0	0	0	0	0	0	0	0	0	0	0	0	0	0	0	0	0	0	0	0	0	0	0	0	0	0	0	0	0	0	0	0	0	0	0	0	0	0	0	0	0	0	0
430	0	0	0	0	0	0	0	0	0	0	0	0	0	0	0	0	0	0	0	0.0476337	0.225633	0.593772	1.31255	2.66457	5.14216	9.59542	17.4815	31.2827	32.8383	34.4332	36.0708	37.7552	39.4906	41.2822	43.136	45.059	47.0596	49.1477	51.3353	53.6372	56.0719	58.6626	61.4393	64.4419	67.7241	71.3619	75.4663	80.2096	84.7579
434	0	0	0	0	0	0	0	0	0	0	0	0	0	0	0	0	0	0	0	0	0	0	0	0	0	0	0	0	0	0	0	0	0	0	0	0	0	0	0	0	0	0	0	0	0	0	0	0	0
438	0	0	0	0	0	0	0	0	0	0	0	0	0	0	0	0	0	0	0	0	0	0	0	0	0	0	0	0	0	0	0	0	0	0	0	0	0	0	0	0	0	0	0	0	0	0	0	0	0
440	0	0	0	0	0	0	0	0	0	0	0	0	0	0	0	0	0	0	0	0	0	0	0	0	0	0	0	0	0	0	0	0	0	0	0	0	0	0	0	0	0	0	0	0	0	0	0	0	0
442	0	0	0	0	0	0	0	0	0	0	0	0	0	0	0	0	0	0	0	0	0	0	0	0	0	0	0	0	0	0	0	0	0	0	0	0	0	0	0	0	0	0	0	0	0	0	0	0	0
446	0	0	0	0	0	0	0	0	0	0	0	0	0	0	0	0	0	0	0	0	0	0	0	0	0	0	0	0	0	0	0	0	0	0	0	0	0	0	0	0	0	0	0	0	0	0	0	0	0
450	0	0	0	0	0	0	0	0	0	0	0	0	0	0	0	0	0	0	0	0.073296	0.439776	1.55754	4.23285	10.0187	21.7689	50.6499	106.448	212.896	222.834	231.707	240.627	249.602	258.638	267.744	276.931	286.212	295.603	305.123	314.799	324.662	334.755	345.134	355.876	367.088	378.926	391.623	405.546	421.312	434.3
454	0	0	0	0	0	0	0	0	0	0	0	0	0	0	0	0	0	0	0	0.0113037	0.0584672	0.116934	0.190993	0.280643	0.385884	0.506716	0.634369	0.775275	0.819079	0.866835	0.916879	0.969455	1.02484	1.08338	1.14546	1.21154	1.2822	1.35811	1.44011	1.52927	1.62692	1.73479	1.85516	1.99114	2.14706	2.3292	2.54711	2.81621	3.12225
458	0	0	0	0	0	0	0	0	0	0	0	0	0	0	0	0	0	0	0	0.10856	0.372669	0.741984	1.20643	1.76467	2.41536	3.15715	3.93433	4.78599	5.05406	5.34625	5.65227	5.9736	6.31196	6.66939	7.04826	7.45141	7.88228	8.34503	8.8448	9.388	9.98279	10.6397	11.3727	12.2005	13.1498	14.2586	15.5853	17.2238	19.0865
462	0	0	0	0	0	0	0	0	0	0	0	0	0	0	0	0	0	0	0	0	0	0	0	0	0	0	0	0	0	0	0	0	0	0	0	0	0	0	0	0	0	0	0	0	0	0	0	0	0
466	0	0	0	0	0	0	0	0	0	0	0	0	0	0	0	0	0	0	0	0.000367943	0.00145241	0.00325279	0.00608952	0.0106083	0.0180079	0.0288106	0.0484793	0.0784904	0.103845	0.136303	0.178749	0.234237	0.306764	0.401558	0.525468	0.687483	0.899414	1.17683	1.54027	2.017	2.64328	3.46762	4.55541	5.99551	7.91008	10.4698	13.9186	18.6158	24.7905
470	0	0	0	0	0	0	0	0	0	0	0	0	0	0	0	0	0	0	0	0	0	0	0	0	0	0	0	0	0	0	0	0	0	0	0	0	0	0	0	0	0	0	0	0	0	0	0	0	0
474	0	0	0	0	0	0	0	0	0	0	0	0	0	0	0	0	0	0	0	0	0	0	0	0	0	0	0	0	0	0	0	0	0	0	0	0	0	0	0	0	0	0	0	0	0	0	0	0	0
478	0	0	0	0	0	0	0	0	0	0	0	0	0	0	0	0	0	0	0	0.00392511	0.0185926	0.0499677	0.112253	0.240786	0.481571	0.917722	1.85309	3.60029	3.73596	3.85291	3.96692	4.07782	4.18542	4.28948	4.38975	4.48595	4.57775	4.66476	4.74656	4.82261	4.89231	4.95493	5.00957	5.05512	5.0902	5.11302	5.12122	5.11159	5.01339
480	0	0	0	0	0	0	0	0	0	0	0	0	0	0	0	0	0	0	0	0	0	0	0	0	0	0	0	0	0	0	0	0	0	0	0	0	0	0	0	0	0	0	0	0	0	0	0	0	0
484	0	0	0	0	0	0	0	0	0	0	0	0	0	0	0	0	0	0	0	0	0	0	0	0	0	0	1.70303	7.72039	8.70302	9.73749	10.8238	11.9619	13.1519	14.3936	15.6873	17.0327	18.43	19.8791	21.3801	22.9329	24.5375	26.1939	27.9022	29.6623	31.4742	33.338	40.2515	47.3018	76.272
492	0	0	0	0	0	0	0	0	0	0	0	0	0	0	0	0	0	0	0	0	0	0	0	0	0	0	0	0	0	0	0	0	0	0	0	0	0	0	0	0	0	0	0	0	0	0	0	0	0
496	0	0	0	0	0	0	0	0	0	0	0	0	0	0	0	0	0	0	0	0	0	0	0	0	0	0	0	0	0	0	0	0	0	0	0	0	0	0	0	0	0	0	0	0	0	0	0	0	0
498	0	0	0	0	0	0	0	0	0	0	0	0	0	0	0	0	0	0	0	0	0	0	0	0	0	0	0	0	0	0	0	0	0	0	0	0	0	0	0	0	0	0	0	0	0	0	0	0	0
500	0	0	0	0	0	0	0	0	0	0	0	0	0	0	0	0	0	0	0	0	0	0	0	0	0	0	0	0	0	0	0	0	0	0	0	0	0	0	0	0	0	0	0	0	0	0	0	0	0
504	0	0	0	0	0	0	0	0	0	0	0	0	0	0	0	0	0	0	0	0.0156006	0.0758948	0.120167	0.159379	0.228823	0.250453	0.246658	0.426908	0.376312	0.408864	0.442762	0.478006	0.514597	0.552533	0.591816	0.632445	0.674419	0.71774	0.762408	0.808421	0.85578	1.0364	1.22531	1.42251	1.628	1.84178	2.06385	2.29421	2.53285	2.74353
508	0	0	0	0	0	0	0	0	0	0	0	0	0	0	0	0	0	0	0	0.0353891	0.207718	0.507756	0.937041	1.49557	2.18335	3.00038	4.32747	5.88536	6.32344	6.77711	7.24637	7.73121	8.23165	8.74768	9.2793	9.82651	10.3893	10.9677	11.5617	12.1712	12.8039	14.6009	16.6392	18.9502	20.6257	22.4366	24.3933	26.5069	28.4139
512	0	0	0	0	0	0	0	0	0	0	0	0	0	0	0	0	0	0	0	0	0	0	0	0	0	0	0	0	0	0	0	0	0	0	0	0	0	0	0	0	0	0	0	0	0	0	0	0	0
516	0	0	0	0	0	0	0	0	0	0	0	0	0	0	0	0	0	0	0	0	0	0	0	0	0	0	0	0	0	0	0	0	0	0	0	0	0	0	0	0	0	0	0	0	0	0	0	0	0
520	0	0	0	0	0	0	0	0	0	0	0	0	0	0	0	0	0	0	0	0	0	0	0	0	0	0	0	0	0	0	0	0	0	0	0	0	0	0	0	0	0	0	0	0	0	0	0	0	0
524	0	0	0	0	0	0	0	0	0	0	0	0	0	0	0	0	0	0	0	0.0637611	0.196993	0.348635	0.516251	0.699606	0.898463	1.11259	1.59731	2.16229	2.30275	2.4473	2.59595	2.74868	2.90549	3.06637	3.23133	3.40034	3.57342	3.75054	3.93171	4.11691	76.9147	82.1894	87.7682	93.4948	99.3903	107.057	159.875	316.774	388.088
528	0	0	0	0	0	0	0	0	0	0	0	0	0	0	0	0	0	0	0	0	0	0	0	0	0	0	0	0	0	0	0	0	0	0	0	0	0	0	0	0	0	0	0	0	0	0	0	0	0
530	0	0	0	0	0	0	0	0	0	0	0	0	0	0	0	0	0	0	0	0	0	0	0	0	0	0	0	0	0	0	0	0	0	0	0	0	0	0	0	0	0	0	0	0	0	0	0	0	0
533	0	0	0	0	0	0	0	0	0	0	0	0	0	0	0	0	0	0	0	0	0	0	0	0	0	0	0	6.08318e-10	1.36902e-09	3.0764e-09	6.90369e-09	1.54727e-08	3.46364e-08	7.74492e-08	1.73001e-07	3.86062e-07	8.60729e-07	1.91734e-06	4.26755e-06	9.06459e-06	1.92398e-05	4.08086e-05	8.65003e-05	0.000202099	0.000507553	0.00169566	0.00417382	0.0109906	0.0217608
540	0	0	0	0	0	0	0	0	0	0	0	0	0	0	0	0	0	0	0	0	0	0	0	0	0	0	0	0	0	0	0	0	0	0	0	0	0	0	0	0	0	0	0	0	0	0	0	0	0
548	0	0	0	0	0	0	0	0	0	0	0	0	0	0	0	0	0	0	0	0	0	0	0	0	0	0	0	0	0	0	0	0	0	0	0	0	0	0	0	0	0	0	0	0	0	0	0	0	0
554	0	0	0	0	0	0	0	0	0	0	0	0	0	0	0	0	0	0	0	0	0	0	0	0	0	0	0	0	0	0	0	0	0	0	0	0	0	0	0	0	0	0	0	0	0	0	0	0	0
558	0	0	0	0	0	0	0	0	0	0	0	0	0	0	0	0	0	0	0	0	0	0	0	0	0	0	0	1.69322e-08	3.77346e-08	8.39698e-08	1.866e-07	4.14137e-07	9.18038e-07	2.0328e-06	4.49651e-06	9.93649e-06	2.19377e-05	4.8392e-05	0.00010666	0.000234906	0.000571768	0.00136923	0.0032768	0.00713168	0.0154599	0.0360834	0.0843944	0.197286	0.454947
562	0	0	0	0	0	0	0	0	0	0	0	0	0	0	0	0	0	0	0	0.0432438	0.13656	0.244669	0.366435	0.523312	0.68529	0.887637	1.1949	1.54767	1.63915	1.7165	1.79569	1.87689	1.96028	2.04608	2.13455	2.22599	2.32075	2.41924	2.52199	2.62961	2.74288	2.86277	2.99055	3.12787	3.27699	3.44104	3.62462	3.83483	4.03012
566	0	0	0	0	0	0	0	0	0	0	0	0	0	0	0	0	0	0	0	0	0	0	0	0	0	0	0	0	0	0	0	0	0.343398	0.447539	0.582931	0.758939	0.987764	1.28532	1.6724	2.17624	2.8326	3.68865	4.80682	6.27035	8.19111	10.7212	14.071	18.5384	24.2421
570	0	0	0	0	0	0	0	0	0	0	0	0	0	0	0	0	0	0	0	0	0	0	0	0	0	0	0	0	0	0	0	0	0	0	0	0	0	0	0	0	0	0	0	0	0	0	0	0	0
574	0	0	0	0	0	0	0	0	0	0	0	0	0	0	0	0	0	0	0	0	0	0	0	0	0	0	0	0	0	0	0	0	0	0	0	0	0	0	0	0	0	0	0	0	0	0	0	0	0
578	0	0	0	0	0	0	0	0	0	0	0	0	0	0	0	0	0	0	0	0	0	0	0	0	0	0	0	0	0	0	0	0	0	0	0	0	0	0	0	0	0	0	0	0	0	0	0	0	0
580	0	0	0	0	0	0	0	0	0	0	0	0	0	0	0	0	0	0	0	0	0	0	0	0	0	0	0	0	0	0	0	0	0	0	0	0	0	0	0	0	0	0	0	0	0	0	0	0	0
583	0	0	0	0	0	0	0	0	0	0	0	0	0	0	0	0	0	0	0	0	0	0	0	0	0	0	0	0	0	0	0	0	0	0	0	0	0	0	0	0	0	0	0	0	0	0	0	0	0
584	0	0	0	0	0	0	0	0	0	0	0	0	0	0	0	0	0	0	0	0	0	0	0	0	0	0	0	0	0	0	0	0	0	0	0	0	0	0	0	0	0	0	0	0	0	0	0	0	0
585	0	0	0	0	0	0	0	0	0	0	0	0	0	0	0	0	0	0	0	0.000145891	0.000820638	0.00256449	0.00673179	0.0162284	0.0371902	0.08241	0.178291	0.378868	0.414877	0.453637	0.495337	0.54018	0.588382	0.640174	0.695799	0.755519	0.819611	0.888371	0.962113	1.04406	1.13217	1.22686	1.32859	1.43786	1.52414	1.61468	1.70968	1.80933	1.88888
586	0	0	0	0	0	0	0	0	0	0	0	0	0	0	0	0	0	0	0	4.32607	14.3787	24.8983	36.1647	46.4975	64.362	80.9193	121.379	169.308	177.885	188.497	199.467	210.807	222.527	234.637	247.149	260.074	273.424	287.21	301.445	316.141	331.312	346.97	363.129	379.803	397.007	414.755	433.061	451.942	465.265
591	0	0	0	0	0	0	0	0	0	0	0	0	0	0	0	0	0	0	0	0	0	0	0	0	0	0	0	0.00106623	0.00233449	0.00510374	0.0111427	0.024296	0.0529133	0.11511	0.250154	0.543097	1.17801	2.55296	5.52821	6.35201	7.29324	8.36813	9.59512	11.3316	13.142	14.7759	17.6444	21.0588	27.258
598	0	0	0	0	0	0	0	0	0	0	0	0	0	0	0	0	0	0	0	0.0219241	0.103356	0.270695	0.59553	1.20321	2.31093	4.29173	7.78171	13.8589	14.2736	14.6711	15.0504	15.41	15.7486	16.0646	16.3562	16.6214	16.8581	17.0636	17.2351	17.369	17.4614	17.5074	17.5014	17.4361	17.2795	17.0439	16.7144	16.2707	15.4784
600	0	0	0	0	0	0	0	0	0	0	0	0	0	0	0	0	0	0	0	0	0	0	0	0	0	0	0	1.32834e-08	2.90109e-08	6.31226e-08	1.36872e-07	2.95848e-07	6.37603e-07	1.37042e-06	2.93807e-06	6.28421e-06	1.34118e-05	2.85646e-05	6.65963e-05	0.000152997	0.000347345	0.000780874	0.00174108	0.00371198	0.00789754	0.0167701	0.0355459	0.0752147	0.195943
604	0	0	0	0	0	0	0	0	0	0	0	0	0	0	0	0	0	0	0	0	0	0	0	0	0	0	0	0.000321521	0.000661533	0.0013591	0.0027884	0.00571353	0.0116933	0.0239049	0.0488185	0.0995997	0.203017	0.413457	0.841346	1.06921	1.59673	2.34108	3.43015	5.0552	7.31866	11.0791	18.6771	28.4613	50.848
608	0	0	0	0	0	0	0	0	0	0	0	0	0	0	0	0	0	0	0	2.739	9.08913	16.0858	23.8195	32.2793	41.4544	51.3339	19.1616	24.9498	25.6554	26.3419	27.0096	27.659	28.2902	28.9037	29.4998	30.0788	30.6409	31.1866	31.716	32.2296	38.4867	45.1212	52.8647	62.2985	72.1203	87.301	117.681	143.397	694.435
612	0	0	0	0	0	0	0	0	0	0	0	0	0	0	0	0	0	0	0	0	0	0	0	0	0	0	0	0	0	0	0	0	0	0	0	0	0	0	0	0	0	0	0	0	0	0	0	0	0
616	0	0	0	0	0	0	0	0	0	0	0	0	0	0	0	0	0	0	0	0	0	0	0	0	0	0	0	0	0	0	0	0	0	0	0	0	0	0	0	0	0	0	0	0	0	0	0	0	0
620	0	0	0	0	0	0	0	0	0	0	0	0	0	0	0	0	0	0	0	5.37387e-11	3.86919e-10	1.61216e-09	5.41687e-09	1.93459e-08	3.40489e-08	1.17624e-07	4.32953e-07	1.01035e-06	2.73433e-06	5.86643e-06	1.24281e-05	2.62951e-05	5.55677e-05	0.000117457	0.000248001	0.000523084	0.0011022	0.00232033	0.00486962	0.0102147	0.022113	0.0479313	0.100944	0.222474	0.493833	1.09724	2.4712	5.41686	11.8894
624	0	0	0	0	0	0	0	0	0	0	0	0	0	0	0	0	0	0	0	0.00423423	0.021776	0.0622172	0.149321	0.329117	0.689577	1.39707	2.76343	5.36894	5.67086	5.98475	6.31175	6.65322	7.01068	7.38595	7.78114	8.19876	8.64183	9.11399	9.61969	10.1645	10.7554	11.4014	12.1142	12.9097	13.81	14.8464	16.0664	17.5456	19.1608
626	0	0	0	0	0	0	0	0	0	0	0	0	0	0	0	0	0	0	0	0.000740053	0.0041628	0.0130087	0.034148	0.082321	0.188652	0.418036	0.904405	1.92186	2.01845	2.11628	2.21528	2.31538	2.41648	2.5185	2.62131	2.7248	2.82883	2.93324	3.03786	3.35366	3.69795	4.07284	4.4805	4.92315	5.18694	5.45819	5.7364	6.02091	6.22859
630	0	0	0	0	0	0	0	0	0	0	0	0	0	0	0	0	0	0	0	0	0	0	0	0	0	0	0.000580572	0.000986973	0.0013375	0.00180983	0.00244561	0.00330051	0.00444897	0.00599038	0.00805744	0.0108272	0.0145357	0.0194975	0.0261317	0.0349962	0.0433955	0.052187	0.0672495	0.0840701	0.103276	0.123653	0.1446	0.168435	0.209414
634	0	0	0	0	0	0	0	0	0	0	0	0	0	0	0	0	0	0	0	0	0	0	0	0	0	0	0	0	0	0	0	0	0	0	0	0	0	0	0	0	0	0	0	0	0	0	0	0	0
638	0	0	0	0	0	0	0	0	0	0	0	0	0	0	0	0	0	0	0	0	0	0	0	0	0	0	0	0	0	0	0	0	0	0	0	0	0	0	0	0	0	0	0	0	0	0	0	0	0
642	0	0	0	0	0	0	0	0	0	0	0	0	0	0	0	0	0	0	0	0	0.0406495	0.0762178	0.118561	0.228653	0.232888	0.44037	0.508119	0.719835	0.895702	0.996592	1.10732	1.22879	1.36196	1.50788	1.66771	1.84267	2.03411	2.24351	2.47244	2.72262	3.10148	3.38204	3.68555	4.05606	4.44015	4.84153	5.25666	5.70109	6.20459
643	0	0	0	0	0	0	0	0	0	0	0	0	0	0	0	0	0	0	0	0.0153108	0.0734919	0.18373	0.385832	0.513393	0.627481	0.955394	1.37797	1.76993	2.08515	2.41916	2.77198	3.1436	3.53402	3.94325	4.37127	4.8181	5.28372	5.76815	6.27138	6.87837	7.55372	9.18336	10.2105	12.0228	13.3579	15.7453	18.5197	21.2759	26.7119
646	0	0	0	0	0	0	0	0	0	0	0	0	0	0	0	0	0	0	0	0	0	0	0	0	0	0	0	0	0	0	0	0	0	0	0	0	0	0	0	0	0	0	0	0	0	0	0	0	0
654	0	0	0	0	0	0	0	0	0	0	0	0	0	0	0	0	0	0	0	0	0	0	0	0	0	0	0	0	0	0	0	0	0	0	0	0	0	0	0	0	0	0	0	0	0	0	0	0	0
659	0	0	0	0	0	0	0	0	0	0	0	0	0	0	0	0	0	0	0	0	0	0	0	0	0	0	0	0	0	0	0	0	0	0	0	0	0	0	0	0	0	0	0	0	0	0	0	0	0
660	0	0	0	0	0	0	0	0	0	0	0	0	0	0	0	0	0	0	0	0	0	0	0	0	0	0	0	0	0	0	0	0	0	0	0	0	0	0	0	0	0	0	0	0	0	0	0	0	0
662	0	0	0	0	0	0	0	0	0	0	0	0	0	0	0	0	0	0	0	0	0	0	0	0	0	0	0	0	0	0	0	0	0	0	0	0	0	0	0	0	0	0	0	0	0	0	0	0	0
666	0	0	0	0	0	0	0	0	0	0	0	0	0	0	0	0	0	0	0	0	0	0	0	0	0	0	0	0	0	0	0	0	0	0	0	0	0	0	0	0	0	0	0	0	0	0	0	0	0
670	0	0	0	0	0	0	0	0	0	0	0	0	0	0	0	0	0	0	0	0	0	0	0	0	0	0	0	0	0	0	0	0	0	0	0	0	0	0	0	0	0	0	0	0	0	0	0	0	0
674	0	0	0	0	0	0	0	0	0	0	0	0	0	0	0	0	0	0	0	0	0	0	0	0	0	0	0	0	0	0	0	0	0	0	0	0	0	0	0	0	0	0	0	0	0	0	0	0	0
678	0	0	0	0	0	0	0	0	0	0	0	0	0	0	0	0	0	0	0	0	0	0	0	0	0	0	0	0	0	0	0	0	0	0	0	0	0	0	0	0	0	0	0	0	0	0	0	0	0
682	0	0	0	0	0	0	0	0	0	0	0	0	0	0	0	0	0	0	0	0	0	0	0	0	0	0	0	0	0	0	0	0	0	0	0	0	0	0	0	0	0	0	0	0	0	0	0	0	0
686	0	0	0	0	0	0	0	0	0	0	0	0	0	0	0	0	0	0	0	0.0102363	0.0383863	0.0799714	0.13995	0.337379	0.773161	1.71325	3.70656	7.87644	8.26436	8.66296	9.07339	9.49696	9.93521	10.39	10.8633	11.3578	11.8766	12.4232	13.0023	13.6195	14.282	14.999	15.7827	16.6493	17.6216	18.7321	20.0295	22.2297	27.8205
690	0	0	0	0	0	0	0	0	0	0	0	0	0	0	0	0	0	0	0	0	0	0	0	0	0	0	0	0	0	0	0	0	0	0	0	0	0	0	0	0	0	0	0	0	0	0	0	0	0
694	0	0	0	0	0	0	0	0	0	0	0	0	0	0	0	0	0	0	0	0.00048187	0.00240935	0.00669264	0.0156162	0.0334632	0.0681658	0.134266	0.258204	0.487718	0.563711	0.650581	0.749807	0.863066	0.99225	1.1395	1.30725	1.49822	1.71552	1.96263	2.2435	2.56259	2.92492	3.33617	3.80275	4.33186	6.90433	10.9982	17.5101	27.863	43.7374
702	0	0	0	0	0	0	0	0	0	0	0	0	0	0	0	0	0	0	0	0	0	0	0	0	0	0	0	0	0	0	0	0	0	0	0	0	0	0	0	0	0	0	0	0	0	0	0	0	0
703	0	0	0	0	0	0	0	0	0	0	0	0	0	0	0	0	0	0	0	0	0	0	0	0	0	0	0	0	0	0	0	0	0	0	0	0	0	0	0	0	0	0	0	0	0	0	0	0	0
704	0	0	0	0	0	0	0	0	0	0	0	0	0	0	0	0	0	0	0	1.03971	3.26778	7.04656	12.0838	18.3609	25.8593	34.5602	49.6039	67.1315	76.6657	86.7197	97.2928	108.384	119.993	132.118	144.76	157.916	171.587	185.772	200.469	215.678	248.279	282.262	317.624	354.364	392.48	485.619	582.57	683.327	777.608
705	0	0	0	0	0	0	0	0	0	0	0	0	0	0	0	0	0	0	0	0	0	0	0	0	0	0	0	0	0	0	0	0	0	0	0	0	0	0	0	0	0	0	0	0	0	0	0	0	0
706	0	0	0	0	0	0	0	0	0	0	0	0	0	0	0	0	0	0	0	0	0	0	0	0	0	0	0	0	0	0	0	0	0	0	0	0	0	0	0	0	0	0	0	0	0	0	0	0	0
710	0	0	0	0	0	0	0	0	0	0	0	0	0	0	0	0	0	0	0	0	0	0	0	0	0	0	0	0	0	0	0	0	0	0	0	0	0	0	0	0	0	0	0	0	0	0	0	0	0
716	0	0	0	0	0	0	0	0	0	0	0	0	0	0	0	0	0	0	0	0.00355278	0.0183764	0.0459411	0.0964763	0.186061	0.341113	1.2094	2.27111	4.16336	4.34673	4.53799	4.73237	4.93013	5.13162	5.33722	5.54738	5.76262	5.98359	6.21104	6.44591	6.68936	6.94285	7.20826	7.48807	7.78562	8.10555	8.45462	8.8431	9.28768	9.68982
724	0	0	0	0	0	0	0	0	0	0	0	0	0	0	0	0	0	0	0	0	0.717352	1.34503	2.3015	4.0351	3.61665	5.05135	7.62186	8.12999	9.54132	10.1835	10.854	11.554	12.2844	13.0465	13.8414	14.6705	15.5349	16.436	17.3752	18.3539	20.1444	20.6414	23.1152	26.1097	28.1817	30.394	32.5404	34.013	34.504
732	0	0	0	0	0	0	0	0	0	0	0	0	0	0	0	0	0	0	0	0	0	0	0	0	0	0	0	0	0	0	0	0	0	0	0	0	0	0	0	0	0	0	0	0	0	0	0	0	0
736	0	0	0	0	0	0	0	0	0	0	0	0	0	0	0	0	0	0	0	0	0	0	0	0	0	0	0	0	0	0	0	0	0	0	0	0	0	0	0	0	0	0	0	0	0	0	0	0	0
740	0	0	0	0	0	0	0	0	0	0	0	0	0	0	0	0	0	0	0	0	0	0	0	0	0	0	0	1.82705e-07	4.14574e-07	9.39313e-07	2.12532e-06	4.80266e-06	1.08399e-05	2.4439e-05	5.50414e-05	0.000123843	0.000278391	0.000625264	0.00140319	0.00309036	0.00680117	0.0149575	0.0328736	0.0722044	0.164368	0.373958	0.850345	1.9326	4.33284
744	0	0	0	0	0	0	0	0	0	0	0	0	0	0	0	0	0	0	0	0	0	0	0	0	0	0	0	0	0	0	0	0	0	0	0	0	0	0	0	0	0	0	0	0	0	0	0	0	0
748	0	0	0	0	0	0	0	0	0	0	0	0	0	0	0	0	0	0	0	0.000139563	0.000685125	0.00205538	0.00503567	0.011099	0.0228917	0.0450898	0.0910467	0.221113	0.264348	0.293933	0.326222	0.361402	0.399662	0.441191	0.486173	0.534784	0.587178	0.643485	0.703796	0.768142	0.836478	0.908647	0.98434	1.06304	1.14392	1.22576	1.30671	1.38404	1.43463
752	0	0	0	0	0	0	0	0	0	0	0	0	0	0	0	0	0	0	0	0	0	0	0	0	0	0	0	0	0	0	0	0	0	0	0	0	0	0	0	0	0	0	0	0	0	0	0	0	0
756	0	0	0	0	0	0	0	0	0	0	0	0	0	0	0	0	0	0	0	0	0	0	0	0	0	0	0	0	0	0	0	0	0	0	0	0	0	0	0	0	0	0	0	0	0	0	0	0	0
760	0	0	0	0	0	0	0	0	0	0	0	0	0	0	0	0	0	0	0	0	0	0	0	0	0	0	0	0	0	0	0	0	0	0	0	0	0	0	0	0	0	0	0	0	0	0	0	0	0
762	0	0	0	0	0	0	0	0	0	0	0	0	0	0	0	0	0	0	0	0.00504717	0.0237938	0.0621883	0.141952	0.295665	0.582204	1.10327	2.15589	4.08387	4.49721	4.86313	5.24857	5.65378	6.07885	6.52371	6.98803	7.4712	7.97226	8.48981	9.02185	9.56571	10.1178	10.6733	11.226	11.7676	12.2871	12.7697	13.1955	13.5361	13.5714
764	0	0	0	0	0	0	0	0	0	0	0	0	0	0	0	0	0	0	0	4.07585	12.8509	25.6602	41.842	61.3772	84.2458	110.427	143.079	179.834	188.475	199.31	210.479	221.991	233.853	246.076	258.667	271.638	284.997	298.753	327.711	357.795	389.004	421.339	454.797	535.986	620.552	708.493	799.808	894.493	915.816
768	0	0	0	0	0	0	0	0	0	0	0	0	0	0	0	0	0	0	0	0.0344915	0.177385	0.337876	0.540602	0.794354	1.10957	1.49865	1.97624	2.5597	2.67099	2.78299	2.89572	3.00917	3.12334	3.23825	3.35389	3.47027	3.58738	3.70525	3.82386	3.9631	4.10441	4.24782	4.39335	4.54103	4.74672	4.95892	5.1778	5.40354	5.56283
772	0	0	0	0	0	0	0	0	0	0	0	0	0	0	0	0	0	0	0	0	0	0	0	0	0	0	0	0	0	0	0	0	0	0	0	0	0	0	0	0	0	0	0	0	0	0	0	0	0
776	0	0	0	0	0	0	0	0	0	0	0	0	0	0	0	0	0	0	0	0	0	0	0	0	0	0	0	0	0	0	0	0	0	0	0	0	0	0	0	0	0	0	0	0	0	0	0	0	0
780	0	0	0	0	0	0	0	0	0	0	0	0	0	0	0	0	0	0	0	0	0	0	0	0	0	0	0.000549369	0.00124524	0.00194257	0.00302592	0.00470699	0.00731265	0.0113472	0.0175882	0.0272333	0.0421265	0.0651047	0.100529	0.155102	0.239116	0.258717	0.298716	0.344672	0.450443	0.560953	0.794399	1.01609	1.29898	1.6186
784	0	0	0	0	0	0	0	0	0	0	0	0	0	0	0	0	0	0	0	0	0	0	0	0	0	0	0	0	0	0	0	0	0	0	0	0	0	0	0	0	0	0	0	0	0	0	0	0	0
788	0	0	0	0	0	0	0	0	0	0	0	0	0	0	0	0	0	0	0	0	0	0	0	0	0	0	0	0	0	0	0	0	0	0	0	0	0	0	0	0	0	0	0	0	0	0	0	0	0
792	0	0	0	0	0	0	0	0	0	0	0	0	0	0	0	0	0	0	0	0.0804335	0.396097	0.723901	1.79268	3.98282	3.92136	4.9939	7.3756	8.88145	9.34462	9.84467	10.3572	10.8826	11.421	11.9728	12.5381	13.1173	13.7107	14.3185	14.941	15.5786	16.6042	17.6288	18.7043	19.833	21.0173	21.9895	22.9601	23.9611	24.6674
795	0	0	0	0	0	0	0	0	0	0	0	0	0	0	0	0	0	0	0	0.0336064	0.155811	0.278016	0.414886	0.56642	0.73934	0.953199	1.28315	1.61005	1.78694	1.95876	2.14415	2.34411	2.55966	2.79192	3.04209	3.31144	3.60134	3.91322	4.24863	4.60924	4.99681	5.41321	5.86045	6.34068	6.85619	7.4094	8.00292	8.63951	9.20055
796	0	0	0	0	0	0	0	0	0	0	0	0	0	0	0	0	0	0	0	0	0	0	0	0	0	0	0	0	0	0	0	0	0	0	0	0	0	0	0	0	0	0	0	0	0	0	0	0	0
798	0	0	0	0	0	0	0	0	0	0	0	0	0	0	0	0	0	0	0	0	0	0	0	0	0	0	0	0	0	0	0	0	0	0	0	0	0	0	0	0	0	0	0	0	0	0	0	0	0
800	0	0	0	0	0	0	0	0	0	0	0	0	0	0	0	0	0	0	0	0	0	0	0	0	0	0	0	0	0	0	0	0	0	0	0	0	0	0	0	0	0	0	0	0	0	0	0	0	0
804	0	0	0	0	0	0	0	0	0	0	0	0	0	0	0	0	0	0	0	0	0	0	0	0	0	0	0	0	0	0	0	0	0	0	0	0	0	0	0	0	0	0	0	0	0	0	0	0	0
807	0	0	0	0	0	0	0	0	0	0	0	0	0	0	0	0	0	0	0	0	0	0	0	0	0	0	0	0	0	0	0	0	0	0	0	0	0	0	0	0	0	0	0	0	0	0	0	0	0
818	0	0	0	0	0	0	0	0	0	0	0	0	0	0	0	0	0	0	0	1.05212	3.58678	5.20083	6.69532	10.1147	10.6527	12.4342	17.9339	18.2926	18.6015	18.8779	19.1218	19.3332	19.5121	19.6584	19.7722	19.8535	19.9023	19.9186	22.8291	25.8698	29.0405	32.3413	35.7722	32.6553	38.2306	44.7323	63.624	45	109.868
826	0	0	0	0	0	0	0	0	0	0	0	0	0	0	0	0	0	0	0	0	0	0	0	0	0	0	0	0	0	0	0	0	0	0	0	0	0	0	0	0	0	0	0	0	0	0	0	0	0
834	0	0	0	0	0	0	0	0	0	0	0	0	0	0	0	0	0	0	0	0.111735	0.574636	1.52638	2.93304	4.79462	7.11112	5.44707	7.63188	10.1758	10.7254	11.2666	11.8247	12.4015	12.9987	13.6186	14.2636	14.9367	15.6414	16.382	17.1636	17.9925	18.8767	19.8261	20.8539	21.9774	23.2204	24.6164	26.215	28.0937	29.9867
840	0	0	0	0	0	0	0	0	0	0	0	0	0	0	0	0	0	0	0	0	0	0	0	0	0	0	0	1.52554e-06	4.69869e-06	1.29273e-05	3.33839e-05	8.27651e-05	0.000199402	0.000470305	0.00109112	0.00249828	0.00565869	0.0148939	0.0396743	0.105723	0.283548	0.757669	2.05251	5.63983	14.118	37.5286	95.8532	131.4	245.16
850	0	0	0	0	0	0	0	0	0	0	0	0	0	0	0	0	0	0	0	0	0	0	0	0	0	0	0	0	0	0	0	0	0	0	0	0	0	0	0	0	0	0	0	0	0	0	0	0	0
854	0	0	0	0	0	0	0	0	0	0	0	0	0	0	0	0	0	0	0	0.139338	0.710624	1.34229	2.12977	3.10337	4.29875	5.75772	7.52932	9.671	10.0915	10.5766	11.0742	11.5856	12.112	12.6549	13.2162	13.7978	14.4023	15.0326	15.6922	16.3856	17.1182	17.8968	18.7303	19.6304	20.6131	21.7006	22.9258	24.3393	25.6858
858	0	0	0	0	0	0	0	0	0	0	0	0	0	0	0	0	0	0	0	0	0	0	0	0	0	0	0	2.99856e-09	6.56526e-09	1.43532e-08	3.13364e-08	6.83275e-08	1.48808e-07	3.23722e-07	7.03504e-07	1.52734e-06	3.3129e-06	7.17966e-06	1.55469e-05	3.36396e-05	9.32816e-05	0.000255297	0.000698248	0.00257545	0.00762043	0.0211083	0.0638665	0.174245	0.40065
860	0	0	0	0	0	0	0	0	0	0	0	0	0	0	0	0	0	0	0	0.0617626	0.289178	0.519449	0.779709	1.06996	1.39019	1.75434	2.31342	2.94961	3.26619	3.58025	3.91912	4.28459	4.67858	5.10311	5.56038	6.05271	6.58257	7.15263	7.76571	8.42484	9.13324	9.89434	10.7118	11.5896	12.5318	13.543	14.6278	15.7914	16.8169
862	0	0	0	0	0	0	0	0	0	0	0	0	0	0	0	0	0	0	0	0	0	0	0	0	0	0	0	5.74858e-08	1.21084e-07	2.54666e-07	5.34881e-07	1.12199e-06	2.35075e-06	4.91971e-06	1.02854e-05	2.14822e-05	4.48266e-05	9.34583e-05	0.000194691	0.000491151	0.00123814	0.00311904	0.00785212	0.0197552	0.0455334	0.104889	0.243822	0.510218	1.04248
876	0	0	0	0	0	0	0	0	0	0	0	0	0	0	0	0	0	0	0	0	0	0	0	0	0	0	0	0	0	0	0	0	0	0	0	0	0	0	0	0	0	0	0	0	0	0	0	0	0
882	0	0	0	0	0	0	0	0	0	0	0	0	0	0	0	0	0	0	0	0	0	0	0	0	0	0	0	0	0	0	0	0	0	0	0	0	0	0	0	0	0	0	0	0	0	0	0	0	0
887	0	0	0	0	0	0	0	0	0	0	0	0	0	0	0	0	0	0	0	0	0	0	0	0	0	0	0	0	0	0	0	0	0	0	0	0	0	0	0	0	0	0	0	0	0	0	0	0	0
891	0	0	0	0	0	0	0	0	0	0	0	0	0	0	0	0	0	0	0	0	0	0	0	0	0	0	0	0	0	0	0	0	0	0	0	0	0	0	0	0	0	0	0	0	0	0	0	0	0
894	0	0	0	0	0	0	0	0	0	0	0	0	0	0	0	0	0	0	0	0	0	0	0	0	0	0	0	0	0	0	0	0	0	0	0	0	0	0	0	0	0	0	0	0	0	0	0	0	0
[truncated: 107 more columns]

## Sheet: upper2
ISO1	y-10000	y-9000	y-8000	y-7000	y-6000	y-5000	y-4000	y-3000	y-2000	y-1000	y0	y100	y200	y300	y400	y500	y600	y700	y800	y900	y1000	y1100	y1200	y1300	y1400	y1500	y1600	y1700	y1710	y1720	y1730	y1740	y1750	y1760	y1770	y1780	y1790	y1800	y1810	y1820	y1830	y1840	y1850	y1860	y1870	y1880	y1890	y1900	y1910
4	0	0	8.71267e-05	0.000177836	0.000362871	0.000740197	0.00445128	0.0115017	0.0242095	0.0463296	0.136264	0.224534	0.365206	0.534283	0.781136	1.14127	1.66625	2.35798	3.33102	4.74848	6.75988	10.3738	15.8597	16.1067	25.0083	38.6093	69.7601	100.691	101.191	101.473	101.725	101.946	102.135	102.29	102.41	102.495	102.541	102.549	102.517	102.443	103.372	106.521	109.717	112.955	116.231	121.319	127.989	134.95	143.786
8	0	0	0	0	0	0	0	0	0	0	0	0	0	0	0	0	0	0	0	0	0.704375	0.682702	0.661029	0.639355	0.617682	0.596009	0.574336	0.828995	0.849069	0.868301	0.886693	0.904243	0.920952	0.936819	0.951846	0.966031	0.979374	0.991877	1.00354	1.01436	1.01537	1.05953	1.10533	1.19886	1.28859	1.39553	1.49794	1.62115	1.75822
12	0	0	0	0	0	0	0	0	0	0	0	0	0	0	0	0	0	0	0	0	0	0	0	0	0	0	0	0	0	0	0	0	0	0	0	0	0	0	0	0	0	0	0	0	0	0	0	0	0
16	0	0	0	0	0	0	0	0	0	0	0	0	0	0	0	0	0	0	0	0	0	0	0	0	0	0	0	0	0	0	0	0	0	0	0	0	0	0	0	0	0	0	0	0	0	0	0	0	0
20	0	0	0	0	0	0	0	0	0	0	0	0	0	0	0	0	0	0	0	0	0	0	0	0	0	0	0	0	0	0	0	0	0	0	0	0	0	0	0	0	0	0	0	0	0	0	0	0	0
24	0	0	1.03284e-05	2.53759e-05	6.23267e-05	0.000153034	0.00037563	0.000921684	0.00226073	0.00554315	0.0135861	0.0265329	0.0517872	0.101017	0.196919	0.383609	0.746758	1.4526	2.82336	5.34597	9.57487	10.827	11.9809	13.0366	14.6937	16.2036	16.5903	16.9033	7.92124	7.92314	7.92836	7.9373	7.95044	7.96834	7.99166	8.02119	8.05789	8.10292	8.15773	8.22412	8.30439	8.40149	8.51934	8.66323	8.84055	9.06193	9.34343	9.71067	10.3212
28	0	0	0	0	0	0	0	0	0	0	0	0	0	0	0	0	0	0	0	0	0	0	0	0	0	0	0	0	0	0	0	0	0	0	0	0	0	0	0	0	0	0	0	0	0	0	0	0	0
31	0	0	0	0	0	0	0	0	0	0	0.00112973	0.00177292	0.00278068	0.00435861	0.00682757	0.0106879	0.0167189	0.0261335	0.0408171	0.062833	0.0963575	0.140089	0.180856	0.218657	0.168996	0.203833	0.235705	0.264613	0.170101	0.181786	0.194237	0.207501	0.221627	0.236666	0.252672	0.269703	0.287817	0.307078	0.327549	0.349301	0.372403	0.396929	0.422957	0.450567	0.479841	0.510865	0.543728	0.57852	0.622172
32	0	0	0	0	0	0	0	0	0	0	0	0	0	0	0	0	0	0	0	0	0	0	0	0	0	0	0	0.000244319	0.000482122	0.000951214	0.00187637	0.00370061	0.00729699	0.0143855	0.028354	0.0558741	0.11008	0.216825	0.593504	0.746517	0.938741	1.18016	1.48326	1.86368	2.44279	3.44632	4.41315	6.10231	8.736
36	0	0	0	0	0	0	0	0	0	0	0	0	0	0	0	0	0	0	0	0	0	0	0	0	0	0	0	0	0	0	0	0	0	0	0	0	0	0.272321	0.245591	0.229777	0.245698	0.310728	0.567939	1.18186	1.72799	2.20437	2.9912	3.51431	4.12644
40	0	0	0	0	0	0	0	0	0	0	0	0	0	0	0	0	0	0	0	0	0	0	0	0	0	0	0	0	0	0	0	0	0	0	0	0	0	0	0	0	0	0	0	0	0	0	0	0	0
44	0	0	0	0	0	0	0	0	0	0	0	0	0	0	0	0	0	0	0	0	0	0	0	0	0	0	0	0	0	0	0	0	0	0	0	0	0	0	0	0	0	0	0	0	0	0	0	0	0
48	0	0	0	0	0	0	0	0	0	0	0	0	0	0	0	0	0	0	0	0	0	0	0	0	0	0	0	0	0	0	0	0	0	0	0	0	0	0	0	0	0	0	0	0	0	0	0	0	0
50	0	0	0	5.93778	9.28815	14.4925	22.5512	34.9854	54.0955	83.3362	127.855	133.155	137.938	143.926	149.305	154.086	158.28	169.391	179.413	193.947	207.022	207.02	206.508	198.328	215.457	219.584	273.097	321.088	324.992	326.904	328.765	330.573	332.324	334.017	335.647	337.212	338.709	340.134	426.856	542.943	690.428	877.747	1115.59	1417.48	1816.2	2326.39	3099.67	3387.12	3437.85
51	0	0	0	0	0	0	0	0	0	0	0	0	0	0	0	0	0	0	0	0	0	0	0	0	0	0	0	0	0	0	0	0	0	0	0	0	0	0	0	0	0	0	0	0	0	0	0	0	0
52	0	0	0	0	0	0	0	0	0	0	0	0	0	0	0	0	0	0	0	0	0	0	0	0	0	0	0	0	0	0	0	0	0	0	0	0	0	0	0	0	0	0	0	0	0	0	0	0	0
56	0	0	0	0	0	0	0	0	0	0	0	0	0	0	0	0	0	0	0	0	0	0	0	0	0	0	0	0	0	0	0	0	0	0	0	0	0	0	0	0	0	0	0	0	0	0	0	0	0
60	0	0	0	0	0	0	0	0	0	0	0	0	0	0	0	0	0	0	0	0	0	0	0	0	0	0	0	0	0	0	0	0	0	0	0	0	0	0	0	0	0	0	0	0	0	0	0	0	0
64	0	0	0.00172497	0.00317855	0.00390349	0.00479223	0.00588137	0.00721557	0.00884928	0.0108489	0.0132952	0.0194736	0.0285065	0.0417039	0.0609722	0.0890827	0.130061	0.189746	0.276602	0.268584	0.260567	0.252549	0.244532	0.260166	0.274197	0.33072	0.424924	0.511112	0.550818	0.553437	0.555964	0.558395	0.560725	0.56295	0.565066	0.567066	0.568947	0.570703	0.715411	0.956838	1.27942	1.7103	2.28568	3.05379	4.16948	5.6911	7.76564	8.74497	9.19631
68	0	0	0	0	0	0	0	0	0	0	0	0	0	0	0	0	0	0	0	0	0	0	0	0	0	0	0	0.00415441	0.0083542	0.0167966	0.033764	0.0678586	0.136354	0.273933	0.55021	1.10489	2.21826	4.45253	8.93507	10.4425	12.2013	12.1571	12.1079	14.215	12.0149	9.88239	15.837	13.5979	15.5504
70	0	0	0	0	0	0	0	0	0	0	0	0	0	0	0	0	0	0	0	0	0	0	0	0	0	0	0	0	0	0	0	0	0	0	0	0	0	0	0	0	0	0	0	0	0	0	0	0	0
72	0	0	0	0	0	0	0	0	0	0	0	0	0	0	0	0	0	0	0	0	0	0	0	0	0	0	0	0	0	0	0	0	0	0	0	0	0	0	0	0	0	0	0	0	0	0	0	0	0
76	0	0	0	0	0	0	0	0	0	0	0	0	0	0	0	0	0	0	0	0	0	0	0	0	0	0	0	5.72828e-06	1.30037e-05	2.96669e-05	6.8028e-05	0.000156797	0.000363262	0.000845897	0.00197964	0.00465545	0.0109993	0.0261039	0.0658213	0.159145	0.397781	0.950175	2.2011	4.98736	11.1157	24.3054	59.3245	141.196	353.377
84	0	0	0	0	0	0	0	0	0	0	0	0	0	0	0	0	0	0	0	0	0	0	0	0	0	0	0	4.86589e-09	1.03891e-08	2.21775e-08	4.73332e-08	1.01003e-07	2.15486e-07	4.59637e-07	9.80209e-07	2.08992e-06	4.45494e-06	9.49414e-06	2.02286e-05	4.11526e-05	8.36987e-05	0.000170187	0.000345955	0.000703057	0.00155507	0.00343857	0.00760106	0.016797	0.0375184
86	0	0	0	0	0	0	0	0	0	0	0	0	0	0	0	0	0	0	0	0	0	0	0	0	0	0	0	0	0	0	0	0	0	0	0	0	0	0	0	0	0	0	0	0	0	0	0	0	0
90	0	0	1.33441e-09	2.45888e-09	4.52951e-09	8.34117e-09	1.53553e-08	2.82581e-08	5.19842e-08	9.5596e-08	1.75728e-07	3.86084e-07	8.47758e-07	1.86036e-06	4.07983e-06	8.9412e-06	1.95812e-05	4.28507e-05	9.36981e-05	0.00020471	0.000446848	0.000974473	0.00212296	0.00462005	0.0100427	0.0218033	0.0472735	0.102352	0.124594	0.151562	0.184225	0.223744	0.271498	0.329129	0.398576	0.482127	0.582461	0.702703	0.846461	0.859533	0.871101	0.880852	0.888407	0.893305	0.877103	0.857384	0.833466	0.804413	0.777412
92	0	0	0	0	0	0	0	0	0	0	0	0	0	0	0	0	0	0	0	0	0	0	0	0	0	0	0	0	0	0	0	0	0	0	0	0	0	0	0	0	0	0	0	0	0	0	0	0	0
96	0	0	5.53709e-08	1.02031e-07	1.87951e-07	3.46115e-07	6.37166e-07	1.17256e-06	2.15707e-06	3.96673e-06	7.29179e-06	1.60205e-05	3.51775e-05	7.71951e-05	0.000169292	0.000371013	0.000812518	0.00177808	0.00388798	0.00566293	0.00824083	0.0143771	0.0348017	0.0555401	0.0878029	0.105903	0.191347	0.331427	0.338608	0.363619	0.390399	0.419064	0.449738	0.482552	0.517644	0.55516	0.595253	0.638085	0.683827	0.706951	0.73066	0.754956	0.779838	0.805303	0.805897	0.806238	0.844032	0.879706	0.923421
100	0	0	0	0	0	0	0	0	0	0	0	0	0	0	0	0	0	0	0	0	2.01893	2.12803	2.20258	2.29071	1.21718	1.70833	2.57219	2.47513	2.52493	2.60942	2.69623	2.78539	2.87693	2.97087	3.06723	3.16604	3.2673	3.37102	3.47721	3.58599	3.64132	3.77115	3.90455	3.90646	3.90618	4.47467	5.04302	4.72163	5.48062
104	0	0	0	0.016485	0.0261001	0.0412619	0.0651279	0.102624	0.161416	2.55357	6.99083	7.47665	7.9254	8.3375	8.71337	9.05343	9.35813	9.62787	9.86308	10.0642	10.2316	12.3403	14.2734	13.2847	15.1988	16.9256	18.2645	19.4378	19.5531	19.658	19.7524	19.8363	19.9098	19.9729	20.0256	20.0679	20.0999	20.1214	21.1228	22.082	21.5616	214.081	400.1	579.627	752.671	919.24	1280.31	2443.11	2821.46
108	0	0	3.21269e-08	6.31459e-08	1.24076e-07	2.43721e-07	4.7858e-07	9.39434e-07	1.84342e-06	3.61594e-06	7.09007e-06	1.51053e-05	3.21628e-05	6.84407e-05	0.000145545	0.000309304	0.000656849	0.00139386	0.00295549	0.00538092	0.00939652	0.016621	0.0284389	0.0474967	0.0778683	0.125786	0.199999	0.314922	0.315836	0.315331	0.314929	0.314643	0.314488	0.314482	0.314644	0.315001	0.31558	0.316419	0.317563	0.319066	0.320999	0.323453	0.326548	0.330444	0.335363	0.341626	0.34971	0.360374	0.379077
112	0	0	0	0	0	0	0	0	0	0	0	0	0	0	0	0	0	0	0	0	0	0	0	0	0	0	0	0	0	0	0	0	0	0	0	0	0	0	0	0	0	0	0	0	0	0	0	0	0
116	0	0	0	0	3.30821	6.91038	14.4646	30.3432	63.7982	134.457	284.056	297.261	310.893	324.946	339.41	354.272	369.514	385.116	401.05	409.227	416.036	441.563	464.305	484.297	501.574	516.169	549.573	578.554	577.331	575.925	574.339	572.571	570.622	568.493	566.183	563.694	561.024	558.175	555.147	551.94	553.264	557.041	560.692	564.211	567.588	594.716	625.724	658.138	699.691
120	0	0	1.96156e-05	4.33741e-05	9.58796e-05	0.000211877	0.000468055	0.00103362	0.00228177	0.00503525	0.0111072	0.0185928	0.0311054	0.0520069	0.0868976	0.145098	0.242106	0.403669	0.67251	1.11946	1.86179	2.06229	2.28208	2.52258	2.78522	3.07142	3.38255	3.71989	3.64209	3.62764	3.61409	3.60154	3.59014	3.58002	3.57137	3.56439	3.55935	3.55654	3.55636	3.55926	3.56586	3.5769	3.5934	3.61669	3.64863	3.69187	3.75032	3.83018	3.98566
124	0	0	0	0	0	0	0	0	0	0	0	0	0	0	0	0	0	0	0	0	0	0	0	0	0	0	0	0	0	0	0	0	0	0	0	0	0	0	0	0	0	0	0	0	0	0	0	0	0
132	0	0	0	0	0	0	0	0	0	0	0	0	0	0	0	0	0	0	0	0	0	0	0	0	0	0	0	0	0	0	0	0	0	0	0	0	0	0	0	0	0	0	0	0	0	0	0	0	0
136	0	0	0	0	0	0	0	0	0	0	0	0	0	0	0	0	0	0	0	0	0	0	0	0	0	0	0	0	0	0	0	0	0	0	0	0	0	0	0	0	0	0	0	0	0	0	0	0	0
140	0	0	2.32891e-05	5.1497e-05	0.000113836	0.000251556	0.00055571	0.00122719	0.00270909	0.00597823	0.0131873	0.0203321	0.0313297	0.0482465	0.0742501	0.114192	0.175495	0.269506	0.413548	0.634044	0.971238	0.990899	1.00994	1.02824	1.04567	1.06208	1.07732	1.09123	1.08028	1.08146	1.08312	1.08535	1.0882	1.09176	1.09613	1.10142	1.10779	1.11541	1.12449	1.1353	1.14819	1.16361	1.18215	1.20461	1.2321	1.26626	1.30952	1.36581	1.45793
144	0	0	0.134335	0.23961	0.426787	0.759049	1.34784	2.38932	4.22789	7.46671	13.1591	14.9266	16.5759	18.1085	19.5256	20.8287	22.019	23.0979	24.0667	24.9267	25.6793	27.8743	29.8527	27.8806	25.707	26.5499	31.8334	36.5886	36.2816	35.0732	33.8987	32.7572	31.6478	30.5698	29.5223	28.5045	27.5157	26.555	25.6218	24.7154	28.4381	34.958	42.961	47.6439	52.1387	50.7339	156.083	192.059	192.675
148	0	0	4.19721e-05	8.24968e-05	0.000162099	0.000318409	0.000625239	0.00122732	0.00240833	0.00472403	0.0092628	0.0155055	0.0259403	0.0433711	0.0724681	0.121004	0.201904	0.336639	0.560839	0.862256	1.32082	2.06428	3.2073	5.09422	8.226	12.7303	21.4679	35.4134	35.6273	34.969	34.3102	33.6509	32.9908	32.3299	31.6679	31.0047	30.3401	29.6738	29.0056	28.3353	27.6626	26.9872	26.3089	25.6276	24.9435	24.2571	23.5701	22.8865	22.4619
152	0	0	0	0	0	0	0	0	0	0	0	0	0	0	0	0	0	0	0	0	0	0	0	0	0	0	0	2.10737e-07	4.26798e-07	8.6422e-07	1.74962e-06	3.54145e-06	7.16692e-06	1.45009e-05	2.93336e-05	5.93256e-05	0.000119956	0.000242495	0.000490095	0.00106591	0.00231766	0.00503811	0.0122585	0.0303038	0.0702214	0.160596	0.357704	0.789032	1.80879
156	0	0	1.79663	4.27279	10.1474	24.0632	56.9722	134.659	317.705	448.869	2823.53	2434.95	1987.22	979.444	1302.97	1569.68	2050.89	1648.98	1253.53	1468.06	1316.85	3133.08	3453.31	2581.21	2212.93	2723.93	2808.86	2729.58	2817.09	3190.45	3344.34	3709.69	4560.05	4964.73	5463.74	6739.26	7190.62	6919.51	7974.42	8094.26	8767.59	9121.88	9368.47	9051.99	7547.48	7501.3	7597.52	7946.4	8338.73
158	0	0	0.0319391	0.0607668	0.115452	0.219022	0.414846	0.784425	1.48057	2.78909	5.24312	5.36544	5.47366	5.56794	5.64847	5.71539	5.76889	5.80912	5.83625	5.85046	5.85191	7.00892	8.14407	9.25019	10.3202	11.3472	11.204	55.1881	62.0879	64.6209	67.244	69.9596	72.7698	75.6769	78.683	81.7902	85.0005	88.3159	91.7382	95.2691	96.5853	98.5215	100.469	102.274	103.975	105.79	107.492	121.205	319.49
162	0	0	0	0	0	0	0	0	0	0	0	0	0	0	0	0	0	0	0	0	0	0	0	0	0	0	0	0	0	0	0	0	0	0	0	0	0	0	0	0	0	0	0	0	0	0	0	0	0
166	0	0	0	0	0	0	0	0	0	0	0	0	0	0	0	0	0	0	0	0	0	0	0	0	0	0	0	0	0	0	0	0	0	0	0	0	0	0	0	0	0	0	0	0	0	0	0	0	0
170	0	0	0	0	0	0	0	0	0	0	0	0	0	0	0	0	0	0	0	0	0	0	0	0	0	0	0	2.64874e-07	5.59273e-07	1.17562e-06	2.46142e-06	5.13531e-06	1.06797e-05	2.2146e-05	4.58019e-05	9.44969e-05	0.000194527	0.000399614	0.000742377	0.00137384	0.00321534	0.00759236	0.0179229	0.0380393	0.0802763	0.190008	0.436664	1.01787	2.47184
174	0	0	0	0	0	0	0	0	0	0	0	0	0	0	0	0	0	0	0	0.0164815	0.0479684	0.0836864	0.141802	0.235119	0.383314	0.61644	1.1138	1.92918	1.89155	1.99678	2.10746	2.22383	2.34616	2.4747	2.60971	2.75149	2.9003	3.05645	3.22023	3.39194	3.57188	3.76038	3.95773	4.16427	4.3803	4.60614	4.84212	5.08853	5.40508
175	0	0	0	0	0	0	0	0	0	0	0	0	0	0	0	0	0	0	0	0	0	0	0	0	0	0	0	0	0	0	0	0	0	0	0	0	0	0	0	0	0	0	0	0	0	0	0	0	0
178	0	0	8.36907e-06	1.64496e-05	3.23219e-05	6.34895e-05	0.00012467	0.000244723	0.000480212	0.000941953	0.00184697	0.00309173	0.0051724	0.00864803	0.0144499	0.0241278	0.0402589	0.0671245	0.111829	0.18615	0.309589	0.514394	0.853824	1.41571	2.34466	3.87839	6.40689	10.5688	10.3459	10.1632	9.9803	9.79706	9.61347	9.42949	9.24504	9.06005	8.87445	8.68813	8.50098	8.31287	8.12367	7.9332	7.74128	7.54768	7.3522	7.1546	6.95478	6.75285	6.62249
180	0	0	0.000404181	0.000765081	0.00144926	0.00274722	0.00521129	0.00989234	0.018791	0.0357184	0.067939	0.129666	0.247658	0.473329	0.905149	1.73174	3.31445	6.34548	12.1506	19.9099	32.1926	36.4024	40.282	43.8314	49.4032	54.4798	55.7798	56.8323	56.5174	56.1133	55.7173	55.3304	54.9537	54.5885	54.2366	53.8997	53.5801	53.2806	53.0045	52.756	52.5404	52.3643	52.2365	52.1685	52.1762	52.282	52.519	52.9386	54.2219
184	0	0	0	0	0	0	0	0	0	0	0	0	0	0	0	0	0	0	0	0	0	0	0	0	0	0	0	0	0	0	0	0	0	0	0	0	0	0	0	0	0	0	0	0	0	0	0	0	0
188	0	0	0	0	0	0	0	0	0	0	0	0	0	0	0	0	0	0	0	0	0	0	0	0	0	0	0	5.86911e-07	1.2531e-06	2.67499e-06	5.7092e-06	1.21828e-05	2.59914e-05	5.54402e-05	0.00011823	0.00025208	0.000537343	0.00114516	0.00251981	0.00553996	0.0128804	0.0303319	0.0697817	0.157522	0.39203	0.987973	2.36851	5.97682	3.276
191	0	0	0	0	0	0	0	0	0	0	0	0	0	0	0	0	0	0	0	0	0	0	0	0	0	0	0	0	0	0	0	0	0	0	0	0	0	0	0	0	0	0	0	0	0	0	0	0	0
192	0	0	0	0	0	0	0	0	0	0	0	0	0	0	0	0	0	0	0	0	0	0	0	0	0	0	0	1.91883e-07	4.40018e-07	1.00885e-06	2.3126e-06	5.30017e-06	1.21449e-05	2.78233e-05	6.37283e-05	0.000145936	0.000334114	0.000764766	0.00175008	0.0040039	0.00988722	0.0243194	0.0598017	0.1248	0.259504	0.545759	1.14897	2.41811	6.31328
196	0	0	0	0	0	0	0	0	0	0	0	0	0	0	0	0	0	0	0	0	0	0	0	0	0	0	0	0	0	0	0	0	0	0	0	0	0	0	0	0	0	0	0	0	0	0	0	0	0
203	0	0	0	0	0	0	0	0	0	0	0	0	0	0	0	0	0	0	0	0	0	0	0	0	0	0	0	0	0	0	0	0	0	0	0	0	0	0	0	0	0	0	0	0	0	0	0	0	0
204	0	0	1.30549e-05	3.20744e-05	7.87793e-05	0.000193431	0.000474786	0.00116498	0.00285751	0.00700639	0.0171725	0.028746	0.0480913	0.0804067	0.13435	0.224333	0.374315	0.624103	1.03975	1.73077	2.87846	3.18845	3.52826	3.9001	4.23888	4.5446	4.52532	4.18129	3.80819	3.46775	3.15715	2.87382	2.61539	2.37972	2.16483	1.96892	1.79033	1.62758	1.47926	1.36514	1.25951	1.16174	1.07128	0.987585	0.990659	0.993448	0.995938	0.998115	1.01108
208	0	0	0	0	0	0	0	0	0	0	0	0	0	0	0	0	0	0	0	0	0	0	0	0	0	0	0	0	0	0	0	0	0	0	0	0	0	0	0	0	0	0	0	0	0	0	0	0	0
212	0	0	0	0	0	0	0	0	0	0	0	0	0	0	0	0	0	0	0	0	0	0	0	0	0	0	0	0	0	0	0	0	0	0	0	0	0	0	0	0	0	0	0	0	0	0	0	0	0
214	0	0	0	0	0	0	0	0	0	0	0	0	0	0	0	0	0	0	0	0	0	0	0	0	0	0	0	3.71123	3.78298	3.85461	3.92599	3.997	4.06748	4.1373	4.20627	4.27423	4.34099	4.40633	4.47003	4.66134	4.85768	5.0588	5.2644	5.47412	6.96719	8.85967	11.3138	14.3411	17.685
218	0	0	0	0	0	0	0	0	0	0	0	0	0	0	0	0	0	0	0	0	0	0	0	0	0	0	0	2.3793e-07	4.69568e-07	9.26547e-07	1.82791e-06	3.60545e-06	7.11013e-06	1.40187e-05	2.76341e-05	5.44614e-05	0.000107309	0.00021139	0.000416322	0.000819724	0.00201598	0.00453362	0.0101927	0.0224653	0.0489266	0.109839	0.237405	0.512965	1.17633
222	0	0	0	0	0	0	0	0	0	0	0	0	0	0	0	0	0	0	0	0	0	0	0	0	0	0	0.499933	0.524801	0.523581	0.523818	0.526058	0.531068	0.539937	0.554212	0.57611	0.667082	0.755086	0.84012	0.922187	1.00128	1.14168	1.27703	1.40734	1.62209	1.82877	2.15242	2.46361	2.76234	3.50664
226	0	0	0	0	0	0	0	0	0	0	0	0	0	0	0	0	0	0	0	0	0	0	0	0	0	0	0	0	0	0	0	0	0	0	0	0	0	0	0	0	0	0	0	0	0	0	0	0	0
231	0	0	0	0	0	0	0	0	0	0	0	0	0	0	0	0	0	0	0	0	0	0	0	0	0	0	0	0	0	0	0	0	0	0	0	0	0	0	0	0	0	0	0	0	0	0	0	0	0
232	0	0	0	0	0	0	0	0	0	0	0	0	0	0	0	0	0	0	0	0	0	0	0	0	0	0	0	0	0	0	0	0	0	0	0	0	0	0	0	0	0	0	0	0	0	0	0	0	0
233	0	0	0	0	0	0	0	0	0	0	0	0	0	0	0	0	0	0	0	0	0	0	0	0	0	0	0	0	0	0	0	0	0	0	0	0	0	0	0	0	0	0	0	0	0	0	0	0	0
234	0	0	0	0	0	0	0	0	0	0	0	0	0	0	0	0	0	0	0	0	0	0	0	0	0	0	0	0	0	0	0	0	0	0	0	0	0	0	0	0	0	0	0	0	0	0	0	0	0
238	0	0	0	0	0	0	0	0	0	0	0	0	0	0	0	0	0	0	0	0	0	0	0	0	0	0	0	0	0	0	0	0	0	0	0	0	0	0	0	0	0	0	0	0	0	0	0	0	0
242	0	0	0	0	0	0	0	0	0	0	0	0	0	0	0	0	0	0	0	0	0	0	0	0	0	0	0	0	0	0	0	0	0	0	0	0	0	0	0	0	0	0	0	0	0	0	0	0	4.368
246	0	0	0	0	0	0	0	0	0	0	0	0	0	0	0	0	0	0	0	0	0	0	0	0	0	0	0	0	0	0	0	0	0	0	0	0	0	0	0	0	0	0	0	0	0	0	0	0	0
250	0	0	0	0	0	0	0	0	0	0	0	0	0	0	0	0	0	0	0	0	5.93153	10.2642	13.4309	19.8178	13.2401	17.3766	20.627	23.8344	24.1587	24.4656	24.7552	25.0274	25.2823	25.4958	25.6926	25.8728	26.0364	26.1832	27.6167	28.7633	29.4458	30.4272	31.3448	31.5256	31.5091	31.9857	32.1814	32.2033	32.5689
254	0	0	0	0	0	0	0	0	0	0	0	0	0	0	0	0	0	0	0	0	0	0	0	0	0	0	0	0.0579401	0.0627168	0.0678407	0.0733294	0.0791998	0.085468	0.0921481	0.0992523	0.106789	0.114764	0.123174	0.132012	0.141257	0.15088	0.160829	0.171035	0.181395	0.191767	0.201953	0.211678	0.22055	0.23054
258	0	0	0	0	0	0	0	0	0	0	0	0	0	0	0	0	0	0	0	0	0	0	0	0	0	0	0	0	0	0	0	0	0	0	0	0	0	0	0	0	0	0	0	0	0	0	0	0	0
262	0	0	0	0	0	0	0	0	0	0	0	0	0	0	0	0	0	0	0	0	0	0	0	0	0	0	0	0	0	0	0	0	0	0	0	0	0	0	0	0	0	0	0	0	0	0	0	0	0
266	0	0	1.85747e-06	4.10724e-06	9.07916e-06	2.00633e-05	4.43217e-05	9.78771e-05	0.000216068	0.000476805	0.00105178	0.00176062	0.00294548	0.00492471	0.00822863	0.0137398	0.0229259	0.0382248	0.0636823	0.106005	0.176299	0.292927	0.486219	0.806191	1.33519	2.20859	3.64847	6.01851	5.98075	5.87404	5.76713	5.65999	5.55258	5.44486	5.33678	5.22829	5.11931	5.00978	4.89959	4.78864	4.67679	4.5639	4.44976	4.33413	4.21672	4.09717	3.975	3.84967	3.7619
268	0	0	0	0	0	0	0	0	0	0	0	0	0	0	0	0	0	0	0	0	0	0	0	0	0	0	0	0	0	0	0	0	0	0	0	0	0	0	0	0	0	0	0	0	0	0	0	0	0
270	0	0	3.95553e-07	7.77466e-07	1.52765e-06	3.00075e-06	5.89237e-06	1.15665e-05	2.26965e-05	4.45202e-05	8.72944e-05	0.000146126	0.000244466	0.000408737	0.000682953	0.00114037	0.00190278	0.00317255	0.00528545	0.00879815	0.0146323	0.0243121	0.0403549	0.0669116	0.110817	0.183307	0.302813	0.499519	0.445015	0.396386	0.353004	0.31431	0.279801	0.249031	0.221598	0.197144	0.17535	0.155929	0.138626	0.204693	0.302171	0.445952	0.657972	0.970523	1.43113	2.10972	3.1091	4.58044	6.8208
275	0	0	0	0	0	0	0	0	0	0	0	0	0	0	0	0	0	0	0	0	0	0	0	0	0	0	0	0	0	0	0	0	0	0	0	0	0	0	0	0	0	0	0	0	0	0	0	0	0
276	0	0	0	0	0	0	0	0	0	0	0	0	0	0	0	0	0	0	0	0	0	0	0	0	0	0	0	0	0	0	0	0	0	0	0	0	0	0	0	0	0	0	0	0	0	0	0	0	0
288	0	0	2.17597e-05	4.81151e-05	0.00010636	0.000235036	0.000519216	0.0011466	0.00253118	0.00558563	0.0123212	0.0206251	0.0345054	0.0576915	0.0963959	0.160958	0.26857	0.447792	0.746019	1.24182	2.06529	3.43156	5.69592	9.44428	15.6414	25.873	42.7408	70.505	69.2218	67.9366	66.6491	65.3589	64.0656	62.7685	61.4672	60.1608	58.8486	57.5297	56.2028	54.8666	53.5195	52.1597	50.7847	49.3917	47.9772	46.537	45.0657	43.5573	42.4724
292	0	0	0	0	0	0	0	0	0	0	0	0	0	0	0	0	0	0	0	0	0	0	0	0	0	0	0	0	0	0	0	0	0	0	0	0	0	0	0	0	0	0	0	0	0	0	0	0	0
296	0	0	0	0	0	0	0	0	0	0	0	0	0	0	0	0	0	0	0	0	0	0	0	0	0	0	0	0	0	0	0	0	0	0	0	0	0	0	0	0	0	0	0	0	0	0	0	0	0
300	0	0	0	0	0	0	0	0	0	0	0	0	0	0	0	0	0	0	0	0	3.3833	5.3123	5.57229	5.75811	4.0053	4.29419	6.20705	5.97282	6.15903	6.33806	6.5099	6.67455	6.83202	6.98231	7.12541	7.26132	7.39005	7.5116	7.62596	7.73313	8.34114	8.99358	9.69668	10.4497	11.2611	12.2532	13.3256	14.4893	15.4217
304	0	0	0	0	0	0	0	0	0	0	0	0	0	0	0	0	0	0	0	0	0	0	0	0	0	0	0	0	0	0	0	0	0	0	0	0	0	0	0	0	0	0	0	0	0	0	0	0	0
308	0	0	0	0	0	0	0	0	0	0	0	0	0	0	0	0	0	0	0	0	0	0	0	0	0	0	0	0	0	0	0	0	0	0	0	0	0	0	0	0	0	0	0	0	0	0	0	0	0
312	0	0	0	0	0	0	0	0	0	0	0	0	0	0	0	0	0	0	0	0	0	0	0	0	0	0	0	0	0	0	0	0	0	0	0	0	0	0	0	0	0	0	0	0	0	0	0	0	0
316	0	0	0	0	0	0	0	0	0	0	0	0	0	0	0	0	0	0	0	0	0	0	0	0	0	0	0	0	0	0	0	0	0	0	0	0	0	0	0	0	0	0	0	0	0	0	0	0	0
320	0	0	0	0	0	0	0	0	0	0	0	0	0	0	0	0	0	0	0	0	0	0	0	0	0	0	0	0.00110709	0.00215534	0.00419535	0.00816467	0.0158864	0.0309048	0.0601088	0.116885	0.227241	0.441689	0.858315	1.66753	1.6199	1.79994	1.99284	2.20581	2.4632	2.71078	2.89487	2.99461	3.0968	3.40868
324	0	0	2.25165e-05	4.97887e-05	0.000110059	0.000243211	0.000537275	0.00118648	0.00261922	0.00577991	0.0127498	0.0213425	0.0357055	0.0596982	0.0997488	0.166556	0.277911	0.463367	0.771967	1.28501	2.13712	3.55091	5.89403	9.77278	16.1854	26.7729	44.2274	72.9573	72.4617	71.9801	71.5139	71.065	70.6353	70.2271	69.8434	69.4873	69.1629	68.875	68.6296	68.4339	68.2973	68.2316	68.2523	68.3802	68.6439	69.0839	69.7603	70.7673	73.0658
328	0	0	0	0	0	0	0	0	0	0	0	0	0	0	0	0	0	0	0	0	0	0	0	0	0	0	0	4.16312e-07	8.60643e-07	1.77888e-06	3.67613e-06	7.59538e-06	1.569e-05	3.24046e-05	6.69114e-05	0.000138134	0.000285103	0.000588308	0.00121368	0.0025152	0.0052111	0.0107938	0.0223513	0.046271	0.0985546	0.209853	0.446706	0.950579	2.04461
332	0	0	0	0	0	0	0	0	0	0	0	0	0	0	0	0	0	0	0	0	0	0	0	0	0	0	0	0.00186276	0.00287175	0.00442647	0.00682161	0.0105107	0.0161917	0.0249381	0.0384011	0.0591193	0.0909953	0.140026	0.215424	0.331341	0.460654	0.606996	0.799615	1.09393	1.48072	1.93856	2.68591	3.72018	5.35326
334	0	0	0	0	0	0	0	0	0	0	0	0	0	0	0	0	0	0	0	0	0	0	0	0	0	0	0	0	0	0	0	0	0	0	0	0	0	0	0	0	0	0	0	0	0	0	0	0	0
336	0	0	0	0	0	0	0	0	0	0	0	0	0	0	0	0	0	0	0	0	0	0	0	0	0	0	0	0	0	0	0	0	0	0	0	0	0	0	0	0	0	0	0	0	0	0	0	0	0
340	0	0	0	0	0	0	0	0	0	0	0	0	0	0	0	0	0	0	0	0	0	0	0	0	0	0	0	1.82163e-08	3.71865e-08	7.58978e-08	1.54879e-07	3.15988e-07	6.44561e-07	1.31452e-06	2.68029e-06	5.46387e-06	1.11358e-05	2.26906e-05	4.62238e-05	9.41411e-05	0.00035294	0.000810245	0.00185958	0.0040717	0.00862118	0.0182485	0.038615	0.0816856	0.174659
0	0	0	0	0	0	0	0	0	0	0	0	0	0	0	0	0	0	0	0	0	0	0	0	0	0	0	0	0	0	0	0	0	0	0	0	0	0	0	0	0	0	0	0	0	0	0	0	0	0
348	0	0	0	0	0	0	0	0	0	0	0	0	0	0	0	0	0	0	0	0	2.11024	2.45437	3.1686	4.78861	3.70103	4.46396	4.30164	4.96717	5.42994	5.87841	6.31259	6.73246	7.13804	7.52933	7.90631	8.269	8.61739	8.95148	9.27128	9.57678	10.65	11.6837	12.222	12.5802	13.0576	13.7828	14.6107	15.8628	17.1597
352	0	0	0	0	0	0	0	0	0	0	0	0	0	0	0	0	0	0	0	0	0	0	0	0	0	0	0	0	0	0	0	0	0	0	0	0	0	0	0	0	0	0	0	0	0	0	0	0	0
356	0	0	0	21.4989	40.2513	75.2483	140.451	261.708	486.769	903.621	1673.95	1708.9	1739.59	1766.05	1788.35	1806.53	1820.65	1830.75	1836.88	1839.11	1837.47	1832.02	1822.8	1809.88	1793.3	1773.11	1749.37	2047.92	2064.56	2079.97	2094.15	2107.11	2118.84	2129.35	2138.64	2146.71	2153.57	2159.21	2704.54	3320.9	4302.43	5190.88	6981.06	9020.5	11624.2	14340	19137	19724.2	17317.6
360	0	0	0.0965742	0.172257	0.306819	0.545684	0.968973	1.7177	17.8315	46.9509	96.8722	102.427	107.535	112.2	116.429	120.227	123.597	126.547	129.08	131.202	132.919	142.5	151.088	158.695	194.586	227.21	239.031	255.883	255.01	254.067	253.052	251.966	250.81	259.468	267.759	275.685	283.245	290.441	301.846	312.741	323.125	333	342.367	429.042	512.5	592.746	669.784	743.618	1628.28
364	0	0	0.000179242	0.000368203	0.00148241	0.00412058	0.0106199	0.0223354	0.0427323	0.0773733	0.227568	0.347209	0.528595	0.803057	1.21757	1.84246	2.78275	3.69438	4.85284	7.41306	11.2894	17.3249	26.4867	26.8992	41.7654	64.48	116.504	168.161	171.121	170.511	169.809	169.01	168.111	167.107	165.993	164.763	163.412	161.934	160.322	158.569	162.099	165.039	167.384	169.125	170.252	188.604	204.839	213.515	222.923
368	0	0	0.000290875	0.000476853	0.000781833	0.00209419	0.00925253	0.022703	0.0584709	0.122885	0.144571	0.222341	0.340975	0.498833	0.729307	1.01711	1.41427	3.61075	7.51936	9.8569	12.7502	10.8132	8.22634	5.78664	5.59048	5.39432	6.49771	5.00201	4.93615	4.87027	4.80437	4.73844	4.6725	4.60652	4.54053	4.47452	4.40848	4.34242	4.50064	4.66349	4.83102	5.00327	5.18026	5.36202	6.02416	6.76605	7.59697	8.52721	9.67451
372	0	0	0	0	0	0	0	0	0	0	0	0	0	0	0	0	0	0	0	0	0	0	0	0	0	0	0	0	0	0	0	0	0	0	0	0	0	0	0	0	0	0	0	0	0	0	0	0	0
376	0	0	0	0	0	0	0	0	0	0	0	0	0	0	0	0	0	0	0	0	0	0	0	0	0	0	0	0	0	0	0	0	0	0	0	0	0	0	0	0	0	0	0	0	0	0	0	0	0
380	0	0	0	0	0	0	0	0	0	0	0	0	0	0	0	0	0	0	0	0	16.4997	29.985	37.9663	54.0023	33.3899	36.2456	51.5104	50.3434	51.2	52.2497	53.311	54.3834	55.4663	56.5592	57.6616	58.7727	59.8919	61.0184	62.1514	63.2899	66.4128	69.6728	73.0746	76.6188	77.1146	80.4262	216.16	179.3	157.248
384	0	0	6.20542e-05	0.000128067	0.000264222	0.000544959	0.00112361	0.00231588	0.00477158	0.00982762	0.0202333	0.0338696	0.0566631	0.0947382	0.158297	0.264317	0.441033	0.735342	1.22508	2.03926	3.39152	5.63514	9.35356	15.5089	25.6855	42.4873	70.1868	115.78	114.983	114.203	113.443	112.703	111.987	111.298	110.64	110.017	109.434	108.897	108.415	107.996	107.652	107.4	107.259	107.256	107.427	107.824	108.524	109.645	112.625
388	0	0	0	0	0	0	0	0	0	0	0	0	0	0	0	0	0	0	0	0	0	0	0	0	0	0	0	6.3613e-09	1.46451e-08	3.37102e-08	7.75796e-08	1.78505e-07	4.10645e-07	9.44484e-07	2.17186e-06	4.99314e-06	1.14768e-05	2.63734e-05	6.05912e-05	0.000122513	0.000247654	0.000500489	0.00101118	0.0020424	0.00455097	0.0101377	0.0225756	0.0502576	0.113089
392	0	0	0.204937	0.43865	0.937573	2.00099	4.2638	9.07012	19.2594	40.8159	86.3196	137.48	183.646	274.889	356.4	507.256	640.302	906.98	1043.83	1140.02	999.324	961.244	918.713	963.841	1119.89	1335.64	1638.02	2225.58	2355.22	2293.28	2231.44	2169.68	2108	2032.25	1957.36	1883.31	1810.05	1737.54	1725.66	1710.14	1690.88	1667.77	1640.65	1627.65	1608.51	1640.22	1960.02	1980.61	2049.36
398	0	0	0	0	0	0	0	0	0	0	0	0	0	0	0	0	0	0	1.35376	2.01659	2.99981	2.97071	2.93761	3.16686	3.43122	3.69709	4.0678	4.40039	4.30042	4.20157	4.10384	4.00722	3.91172	3.81733	3.72406	3.6319	3.54087	3.45094	3.36214	3.27445	3.18787	3.10241	3.01807	2.93485	2.85274	3.608	4.18641	5.57818	6.99349
400	0	0	0	0	0	0	0	0	0	0	0	0	0	0	0	0	0	0	0	0	0	0	0	0	0	0	0	0	0	0	0	0	0	0	0	0	0	0	0	0	0	0	0	0	0	0	0	0	0
404	0	0	0	0	0	0	0	0	0	0	0	0	0	0	0	0	0	0	0	0	0	0	0	0	0	0	0	1.3578	1.58443	1.80444	2.01783	2.22462	2.37639	2.3745	2.37382	2.37453	2.37684	2.38101	2.38735	2.39626	2.40824	2.42394	2.44419	2.47015	2.50339	2.54616	2.60184	2.67579	2.80796
408	0	0	0	4.61236	5.14309	5.70223	6.28172	6.86996	7.45096	8.00343	8.49968	10.4599	12.8631	15.8065	19.4083	23.8114	29.1884	35.7474	43.739	47.0143	49.8587	57.0419	72.426	51.6627	57.2494	62.058	73.4665	86.8323	93.9406	97.3765	100.919	104.57	108.331	112.205	116.192	120.295	124.515	128.853	133.31	137.887	137.84	136.055	134.256	132.444	130.619	128.713	127.503	126.264	126.384
410	0	0	0	4.81159	5.45605	6.16386	6.9354	7.76917	8.66119	9.60428	10.5873	14.0558	18.6488	24.7258	32.76	43.3728	57.379	75.8461	100.17	108.181	115.278	132.534	169.12	121.251	135.062	147.184	175.185	208.2	225.615	238.177	251.39	265.284	279.891	295.242	311.369	328.306	346.087	364.746	384.32	404.846	402.674	396.49	390.297	387.501	384.571	379.318	374.013	368.674	781.91
414	0	0	0	0	0	0	0	0	0	0	0	0	0	0	0	0	0	0	0	0	0	0	0	0	0	0	0	0	0	0	0	0	0	0	0	0	0	0	0	0	0	0	0	0	0	0	0	0	0
417	0	0	5.13362e-05	8.82895e-05	0.000151796	0.000260899	0.000448272	0.000769949	0.00132199	0.00226899	0.00389287	0.00610919	0.00958176	0.015019	0.0235266	0.0368286	0.0576104	0.0900515	0.140649	0.213765	0.324038	0.339193	0.352752	0.364717	0.375086	0.38386	0.422744	0.457641	0.476964	0.496658	0.517069	0.538215	0.560114	0.582785	0.606247	0.630516	0.655611	0.681549	0.708345	0.736015	0.764572	0.794032	0.824405	0.855701	0.887931	0.921101	0.955216	0.990278	1.03769
418	0	0	0.0103579	0.0184751	0.0329073	0.0585263	0.103925	0.184228	0.325991	0.575719	1.01463	1.06123	1.1093	1.15882	1.20975	1.26204	1.31564	1.37045	1.42638	1.61962	1.79676	1.95799	2.10352	2.23352	2.34821	2.44776	2.93487	3.37328	3.3822	3.38961	3.39552	3.39993	3.40284	3.40424	3.40415	3.40256	3.39949	3.39492	3.72297	4.03879	76.4715	81.6032	86.5203	91.2231	95.7119	99.9871	144.696	285.822	313.612
422	0	0	0	0	0	0	0	0	0	0	0	0	0	0	0	0	0	0	0	0	0	0	0	0	0	0	0	0	0	0	0	0	0	0	0	0	0	0	0	0	0	0	0	0	0	0	0	0	0
426	0	0	0	0	0	0	0	0	0	0	0	0	0	0	0	0	0	0	0	0	0	0	0	0	0	0	0	0	0	0	0	0	0	0	0	0	0	0	0	0	0	0	0	0	0	0	0	0	0
428	0	0	0	0	0	0	0	0	0	0	0	0	0	0	0	0	0	0	0	0	0	0	0	0	0	0	0	0	0	0	0	0	0	0	0	0	0	0	0	0	0	0	0	0	0	0	0	0	0
430	0	0	0.000117226	0.00025921	0.000572991	0.00126621	0.00279717	0.00617708	0.0136362	0.0300914	0.0663781	0.102341	0.157698	0.242849	0.373738	0.574785	0.883353	1.35656	2.08159	3.19146	4.88872	7.48153	11.4379	17.4678	26.6457	40.596	61.7681	93.8482	93.4628	93.0971	92.7536	92.4351	92.1446	91.8861	91.664	91.4835	91.351	91.2742	91.2627	91.3283	91.4857	91.7543	92.159	92.7334	93.5238	94.596	96.0481	98.034	101.934
434	0	0	0	0	0	0	0	0	0	0	0	0	0	0	0	0	0	0	0	0	0	0	0	0	0	0	0	0	0	0	0	0	0	0	0	0	0	0	0	0	0	0	0	0	0	0	0	0	0
438	0	0	0	0	0	0	0	0	0	0	0	0	0	0	0	0	0	0	0	0	0	0	0	0	0	0	0	0	0	0	0	0	0	0	0	0	0	0	0	0	0	0	0	0	0	0	0	0	0
440	0	0	0	0	0	0	0	0	0	0	0	0	0	0	0	0	0	0	0	0	0	0	0	0	0	0	0	0	0	0	0	0	0	0	0	0	0	0	0	0	0	0	0	0	0	0	0	0	0
442	0	0	0	0	0	0	0	0	0	0	0	0	0	0	0	0	0	0	0	0	0	0	0	0	0	0	0	0	0	0	0	0	0	0	0	0	0	0	0	0	0	0	0	0	0	0	0	0	0
446	0	0	0	0	0	0	0	0	0	0	0	0	0	0	0	0	0	0	0	0	0	0	0	0	0	0	0	0	0	0	0	0	0	0	0	0	0	0	0	0	0	0	0	0	0	0	0	0	0
450	0	0	7.45323e-07	1.64806e-06	3.64309e-06	8.05058e-06	1.77845e-05	3.9274e-05	8.66992e-05	0.000191322	0.000422033	0.00123631	0.00361956	0.0105906	0.0309673	0.0904889	0.264228	0.770966	2.24775	4.91083	9.52849	19.625	36.8862	65.6778	112.803	214.288	376.117	638.689	634.22	626.467	618.756	611.095	603.489	595.947	588.479	581.097	573.817	566.657	559.642	552.802	546.178	539.824	533.813	528.249	523.279	519.128	516.15	514.937	522.308
454	0	0	3.15891e-05	5.83589e-05	0.000107799	0.000199095	0.000367656	0.000678829	0.00125318	0.00231315	0.00426902	0.00764238	0.0136734	0.024449	0.0436883	0.0780149	0.139213	0.248232	0.442272	0.757345	1.26679	1.47337	1.66437	1.83977	1.99958	2.1438	2.24144	2.32583	2.33122	2.34367	2.35769	2.37349	2.3913	2.4114	2.4341	2.4598	2.48897	2.5222	2.5602	2.60389	2.65445	2.71339	2.78274	2.8653	2.96499	3.08754	3.24177	3.44204	3.75495
458	0	0	0.0163111	0.0291689	0.0520977	0.0929281	0.165526	0.294399	0.522771	0.926697	1.63968	1.94848	2.31404	2.74646	3.25753	3.86103	4.57299	5.41206	6.39988	7.27352	8.07448	9.349	10.5132	11.5684	12.5159	13.3572	13.9013	14.358	14.3846	14.4547	14.5344	14.625	14.7279	14.8448	14.9775	15.1286	15.3009	15.4979	15.7241	15.985	16.2877	16.6416	17.059	17.5569	18.1592	18.9009	19.8358	21.0513	22.9543
462	0	0	0	0	0	0	0	0	0	0	0	0	0	0	0	0	0	0	0	0	0	0	0	0	0	0	0	0	0	0	0	0	0	0	0	0	0	0	0	0	0	0	0	0	0	0	0	0	0
466	0	0	1.03763e-05	1.912e-05	3.52211e-05	6.48604e-05	0.000119402	0.000219733	0.000404226	0.000743348	0.00136645	0.00190614	0.00265744	0.0037026	0.00515552	0.00717373	0.0099749	0.0138595	0.0192415	0.0246522	0.0314688	0.0409851	0.0530658	0.0695432	0.0933136	0.121891	0.171294	0.235471	0.295558	0.368524	0.45964	0.573478	0.715783	0.89379	1.11662	1.3958	1.74592	2.18553	2.73826	3.43436	4.31272	5.42372	6.83312	8.62768	10.9234	13.8786	17.7145	22.7527	29.8141
470	0	0	0	0	0	0	0	0	0	0	0	0	0	0	0	0	0	0	0	0	0	0	0	0	0	0	0	0	0	0	0	0	0	0	0	0	0	0	0	0	0	0	0	0	0	0	0	0	0
474	0	0	0	0	0	0	0	0	0	0	0	0	0	0	0	0	0	0	0	0	0	0	0	0	0	0	0	0	0	0	0	0	0	0	0	0	0	0	0	0	0	0	0	0	0	0	0	0	0
478	0	0	1.28012e-05	2.5161e-05	4.94392e-05	9.71127e-05	0.000190694	0.000374325	0.000734525	0.0014408	0.0028251	0.00472907	0.00791163	0.0132279	0.0221023	0.0369055	0.0615795	0.102673	0.171052	0.262983	0.402841	0.629594	0.978206	1.57848	2.49541	3.88267	6.54759	10.8009	10.6331	10.4171	10.2006	9.98363	9.76597	9.54755	9.32822	9.10784	8.88622	8.66313	8.43832	8.21147	7.98219	7.75002	7.51435	7.27444	7.02932	6.77772	6.51791	6.2475	6.02931
480	0	0	0	0	0	0	0	0	0	0	0	0	0	0	0	0	0	0	0	0	0	0	0	0	0	0	0	0	0	0	0	0	0	0	0	0	0	0	0	0	0	0	0	0	0	0	0	0	0
484	0	0	0	0	0	0	0	0	0	0	0	0	0	0	0	0	0	0	0	0	0	0	0	0	0	0	6.01737	23.1612	24.7701	26.3273	27.8326	29.286	30.6877	32.0375	33.3355	34.5816	35.7759	36.9184	38.009	39.0478	40.0348	40.97	41.8533	42.6848	43.4644	44.1922	51.2291	57.8133	91.728
492	0	0	0	0	0	0	0	0	0	0	0	0	0	0	0	0	0	0	0	0	0	0	0	0	0	0	0	0	0	0	0	0	0	0	0	0	0	0	0	0	0	0	0	0	0	0	0	0	0
496	0	0	0	0	0	0	0	0	0	0	0	0	0	0	0	0	0	0	0	0	0	0	0	0	0	0	0	0	0	0	0	0	0	0	0	0	0	0	0	0	0	0	0	0	0	0	0	0	0
498	0	0	0	0	0	0	0	0	0	0	0	0	0	0	0	0	0	0	0	0	0	0	0	0	0	0	0	0	0	0	0	0	0	0	0	0	0	0	0	0	0	0	0	0	0	0	0	0	0
500	0	0	0	0	0	0	0	0	0	0	0	0	0	0	0	0	0	0	0	0	0	0	0	0	0	0	0	0	0	0	0	0	0	0	0	0	0	0	0	0	0	0	0	0	0	0	0	0	0
504	0	0	3.29488e-05	7.28567e-05	0.000161052	0.000355895	0.000786205	0.0017362	0.00383275	0.00845785	0.018657	0.0291988	0.0456703	0.0713903	0.111523	0.1741	0.271596	0.423372	0.659442	1.04524	1.64439	1.5141	1.38887	1.50006	1.2978	1.04355	1.50841	1.12894	1.16369	1.1971	1.22916	1.25987	1.28924	1.31727	1.34394	1.36928	1.39326	1.4159	1.43719	1.45714	1.69097	1.91652	2.13377	2.34274	2.54341	2.7358	2.9199	3.09571	3.29949
508	0	0	6.50642e-05	0.000134279	0.000277039	0.000571393	0.00117811	0.00242821	0.00500303	0.0103043	0.0212148	0.0349576	0.0575695	0.0947498	0.155842	0.256153	0.420732	0.690533	1.13245	2.37107	4.50057	6.39773	8.16564	9.80431	11.3137	12.6939	15.2904	17.6561	17.9975	18.3233	18.6335	18.9281	19.2072	19.4706	19.7185	19.9508	20.1675	20.3686	20.5541	20.724	20.8906	22.8374	24.9589	27.2699	28.4831	29.7416	31.046	32.3973	34.1718
512	0	0	0	0	0	0	0	0	0	0	0	0	0	0	0	0	0	0	0	0	0	0	0	0	0	0	0	0	0	0	0	0	0	0	0	0	0	0	0	0	0	0	0	0	0	0	0	0	0
516	0	0	0	0	0	0	0	0	0	0	0	0	0	0	0	0	0	0	0	0	0	0	0	0	0	0	0	0	0	0	0	0	0	0	0	0	0	0	0	0	0	0	0	0	0	0	0	0	0
520	0	0	0	0	0	0	0	0	0	0	0	0	0	0	0	0	0	0	0	0	0	0	0	0	0	0	0	0	0	0	0	0	0	0	0	0	0	0	0	0	0	0	0	0	0	0	0	0	0
524	0	0	0.0397058	0.0708221	0.126146	0.224354	0.398386	0.706218	1.24965	2.20695	3.88948	3.94391	3.99672	4.04768	4.09658	4.14321	4.1873	4.2286	4.26683	4.272	4.26819	4.3928	4.49876	4.58631	4.65567	4.70709	5.64382	6.48688	6.55398	6.61678	6.67529	6.72952	6.77947	6.82515	6.86657	6.90373	6.93663	6.96529	6.9897	7.00988	125.492	128.553	131.652	134.541	137.253	141.912	203.477	387.168	466.731
528	0	0	0	0	0	0	0	0	0	0	0	0	0	0	0	0	0	0	0	0	0	0	0	0	0	0	0	0	0	0	0	0	0	0	0	0	0	0	0	0	0	0	0	0	0	0	0	0	0
530	0	0	0	0	0	0	0	0	0	0	0	0	0	0	0	0	0	0	0	0	0	0	0	0	0	0	0	0	0	0	0	0	0	0	0	0	0	0	0	0	0	0	0	0	0	0	0	0	0
533	0	0	0	0	0	0	0	0	0	0	0	0	0	0	0	0	0	0	0	0	0	0	0	0	0	0	0	1.82495e-09	3.89643e-09	8.31767e-09	1.77523e-08	3.78814e-08	8.08182e-08	1.72387e-07	3.67628e-07	7.83824e-07	1.67083e-06	3.56078e-06	7.58675e-06	1.54343e-05	3.13912e-05	6.38289e-05	0.00012975	0.000290825	0.000700907	0.00224774	0.00531214	0.013433	0.0261705
540	0	0	0	0	0	0	0	0	0	0	0	0	0	0	0	0	0	0	0	0	0	0	0	0	0	0	0	0	0	0	0	0	0	0	0	0	0	0	0	0	0	0	0	0	0	0	0	0	0
548	0	0	0	0	0	0	0	0	0	0	0	0	0	0	0	0	0	0	0	0	0	0	0	0	0	0	0	0	0	0	0	0	0	0	0	0	0	0	0	0	0	0	0	0	0	0	0	0	0
554	0	0	0	0	0	0	0	0	0	0	0	0	0	0	0	0	0	0	0	0	0	0	0	0	0	0	0	0	0	0	0	0	0	0	0	0	0	0	0	0	0	0	0	0	0	0	0	0	0
558	0	0	0	0	0	0	0	0	0	0	0	0	0	0	0	0	0	0	0	0	0	0	0	0	0	0	0	5.07966e-08	1.07398e-07	2.2703e-07	4.79828e-07	1.01392e-06	2.14209e-06	4.52461e-06	9.55509e-06	2.01741e-05	4.25849e-05	8.98708e-05	0.000189618	0.000399975	0.000932885	0.00214162	0.0049152	0.0102627	0.0213495	0.0478315	0.107411	0.241127	0.547139
562	0	0	0	0	0	0	0	0	0.699975	0.915352	1.19654	1.3353	1.48928	1.66001	1.84912	2.05839	2.28972	2.54513	2.82678	2.89734	2.95879	3.08283	3.19322	3.4306	3.55105	3.75539	4.22196	4.64302	4.66529	4.64091	4.61749	4.59513	4.57398	4.55418	4.53592	4.51943	4.50498	4.49288	4.48354	4.47745	4.47523	4.47767	4.48583	4.50109	4.52536	4.56137	4.61315	4.68701	4.84679
566	0	0	0	0	0	0	0	0	0	0	0	0	0	0	0	0	0	0	0	0	0	0	0	0	0	0	0	0	0	0	0	0	0.801262	0.996135	1.23873	1.54088	1.91742	2.38702	2.97315	3.70549	4.62162	5.76942	7.21023	9.02318	11.3115	14.2118	17.9085	22.6581	29.1545
570	0	0	0	0	0	0	0	0	0	0	0	0	0	0	0	0	0	0	0	0	0	0	0	0	0	0	0	0	0	0	0	0	0	0	0	0	0	0	0	0	0	0	0	0	0	0	0	0	0
574	0	0	0	0	0	0	0	0	0	0	0	0	0	0	0	0	0	0	0	0	0	0	0	0	0	0	0	0	0	0	0	0	0	0	0	0	0	0	0	0	0	0	0	0	0	0	0	0	0
578	0	0	0	0	0	0	0	0	0	0	0	0	0	0	0	0	0	0	0	0	0	0	0	0	0	0	0	0	0	0	0	0	0	0	0	0	0	0	0	0	0	0	0	0	0	0	0	0	0
580	0	0	0	0	0	0	0	0	0	0	0	0	0	0	0	0	0	0	0	0	0	0	0	0	0	0	0	0	0	0	0	0	0	0	0	0	0	0	0	0	0	0	0	0	0	0	0	0	0
583	0	0	0	0	0	0	0	0	0	0	0	0	0	0	0	0	0	0	0	0	0	0	0	0	0	0	0	0	0	0	0	0	0	0	0	0	0	0	0	0	0	0	0	0	0	0	0	0	0
584	0	0	0	0	0	0	0	0	0	0	0	0	0	0	0	0	0	0	0	0	0	0	0	0	0	0	0	0	0	0	0	0	0	0	0	0	0	0	0	0	0	0	0	0	0	0	0	0	0
585	0	0	0	0	0	0	0	0	0	0	4.32949e-05	7.92678e-05	0.000145046	0.000265246	0.000484745	0.000885289	0.00161565	0.00294635	0.00536879	0.00977471	0.0177805	0.0323126	0.0586628	0.106386	0.192713	0.348658	0.629961	1.1366	1.1808	1.2265	1.27372	1.32251	1.37289	1.4249	1.47857	1.53393	1.59101	1.64983	1.71042	1.77773	1.84722	1.91893	1.99288	2.06911	2.10476	2.14039	2.17596	2.2114	2.27165
586	0	0	0.136755	0.335994	0.825248	2.02628	4.9736	12.2037	29.9337	73.3951	179.89	188.573	196.634	206.531	215.681	224.084	231.74	249.698	266.287	289.847	311.539	313.718	315.15	304.817	333.512	342.351	428.872	507.924	506.288	509.639	512.916	516.115	519.23	522.258	525.193	528.03	530.764	533.39	535.902	538.294	540.561	542.696	544.694	546.546	548.248	549.791	551.169	552.374	559.548
591	0	0	0	0	0	0	0	0	0	0	0	0	0	0	0	0	0	0	0	0	0	0	0	0	0	0	0	0.0031987	0.00664431	0.013799	0.0286526	0.0594834	0.123464	0.256212	0.531576	1.10265	2.28672	4.74121	9.82794	10.8156	11.8995	13.0886	14.3927	16.3065	18.1485	19.5866	22.4565	25.7386	32.7816
598	0	0	5.63231e-05	0.000124542	0.000275303	0.000608371	0.00134395	0.00296788	0.00655174	0.0144579	0.0318925	0.0489376	0.0750488	0.115022	0.176173	0.269652	0.41244	0.630363	0.962667	1.46891	2.23939	3.41076	5.18962	7.88773	11.9748	18.1573	27.4954	41.5766	40.6248	39.6664	38.701	37.7279	36.7467	35.7566	34.7569	33.7465	32.7246	31.6896	30.6402	29.5743	28.4896	27.3834	26.252	25.0909	23.8621	22.5931	21.2729	19.8864	18.6149
600	0	0	0	0	0	0	0	0	0	0	0	0	0	0	0	0	0	0	0	0	0	0	0	0	0	0	0	3.98502e-08	8.25695e-08	1.70665e-07	3.51957e-07	7.24316e-07	1.48774e-06	3.05029e-06	6.2434e-06	1.27589e-05	2.60346e-05	5.30485e-05	0.000118393	0.000260509	0.000566722	0.00122137	0.00261162	0.00534163	0.0109061	0.0222301	0.0452402	0.091929	0.235649
604	0	0	0	0	0	0	0	0	0	0	0	0	0	0	0	0	0	0	0	0	0	0	0	0	0	0	0	0.000964563	0.00188283	0.00367461	0.00717017	0.0139883	0.0272844	0.0532077	0.103739	0.202218	0.394092	0.767849	1.49573	1.82055	2.6052	3.66168	5.14522	7.27456	10.1067	14.6863	23.7708	34.7861	61.152
608	0	0	0.190594	0.435144	0.992086	2.25849	5.13332	11.6478	26.3817	59.6372	134.532	138.719	142.95	147.218	151.513	155.826	160.144	164.455	168.744	183.513	196.931	202.681	207.57	211.609	214.809	217.182	67.7044	74.8495	73.0192	71.2206	69.4533	67.7167	66.0105	64.3341	62.6871	61.069	59.4794	57.9179	56.3841	54.8774	62.7942	70.5743	79.297	89.6491	99.5948	115.725	149.776	175.263	835.158
612	0	0	0	0	0	0	0	0	0	0	0	0	0	0	0	0	0	0	0	0	0	0	0	0	0	0	0	0	0	0	0	0	0	0	0	0	0	0	0	0	0	0	0	0	0	0	0	0	0
616	0	0	0	0	0	0	0	0	0	0	0	0	0	0	0	0	0	0	0	0	0	0	0	0	0	0	0	0	0	0	0	0	0	0	0	0	0	0	0	0	0	0	0	0	0	0	0	0	0
620	0	0	1.4196e-15	4.18538e-15	1.23359e-14	3.63467e-14	1.07058e-13	3.15225e-13	9.27833e-13	2.72997e-12	8.02932e-12	1.74231e-11	3.40065e-11	6.63338e-11	1.29309e-10	2.2671e-10	3.92293e-10	7.6309e-10	1.48319e-09	3.6005e-09	8.38324e-09	2.03132e-08	4.72041e-08	1.26823e-07	1.76435e-07	4.97638e-07	1.52977e-06	3.03105e-06	7.78233e-06	1.58611e-05	3.1958e-05	6.43777e-05	0.000129658	0.000261437	0.000527001	0.00106202	0.00213957	0.00430918	0.0086571	0.0173927	0.0360791	0.0749695	0.151416	0.320146	0.68196	1.45448	3.14516	6.62061	14.2987
624	0	0	4.97098e-06	1.09919e-05	2.42978e-05	5.36938e-05	0.000118615	0.000261941	0.000578246	0.00127603	0.00281478	0.0047118	0.00788274	0.0131796	0.0220216	0.0367708	0.0613547	0.102298	0.170428	0.283693	0.471814	0.783937	1.30123	2.15754	3.57327	5.91066	9.76411	16.1068	16.1401	16.181	16.2302	16.2889	16.3583	16.4397	16.5349	16.646	16.7753	16.926	17.1017	17.3071	17.5483	17.8329	18.1713	18.5774	19.0709	19.6801	20.4482	21.4446	23.0436
626	0	0	1.6677e-06	3.07303e-06	5.66084e-06	1.04245e-05	1.91906e-05	3.53161e-05	6.49682e-05	0.000119473	0.000219619	0.000402097	0.000735765	0.0013455	0.00245894	0.00449075	0.00819562	0.0149458	0.027234	0.0495836	0.090194	0.16391	0.297575	0.53966	0.977562	1.76861	3.19557	5.76558	5.74481	5.72178	5.69643	5.66868	5.63846	5.60569	5.57029	5.53218	5.49126	5.44745	5.40065	5.71028	6.0335	6.37034	6.72074	7.08453	7.16292	7.23528	7.30087	7.35889	7.49077
630	0	0	0	0	0	0	0	0	0	0	0	0	0	0	0	0	0	0	0	0	0	0	0	0	0	0	0.00205136	0.00296092	0.00380673	0.00489325	0.00628871	0.00808057	0.0103809	0.0133334	0.0171221	0.0219825	0.0282163	0.0362096	0.0464563	0.0595882	0.0708031	0.0816258	0.100874	0.120979	0.142619	0.163912	0.184037	0.205864	0.25185
634	0	0	0	0	0	0	0	0	0	0	0	0	0	0	0	0	0	0	0	0	0	0	0	0	0	0	0	0	0	0	0	0	0	0	0	0	0	0	0	0	0	0	0	0	0	0	0	0	0
638	0	0	0	0	0	0	0	0	0	0	0	0	0	0	0	0	0	0	0	0	0	0	0	0	0	0	0	0	0	0	0	0	0	0	0	0	0	0	0	0	0	0	0	0	0	0	0	0	0
642	0	0	0	0	0	0	0	0	0	0	0	0	0	0	0	0	0	0	0	0	0.880739	0.960344	1.03317	1.49895	1.20678	1.8631	1.79535	2.1595	2.54931	2.69449	2.8474	3.00842	3.17791	3.35626	3.54388	3.74117	3.94857	4.16651	4.39544	4.63582	5.0603	5.28985	5.52833	5.83677	6.13163	6.41784	6.69029	6.968	7.46191
643	0	0	0.000228568	0.000393098	0.000675856	0.00116164	0.00199593	0.00342828	0.00588652	0.010104	0.0173374	0.0285748	0.0464958	0.0748796	0.119593	0.175259	0.257425	0.410989	0.657344	1.02582	1.59232	2.31499	3.36225	3.36558	3.25149	4.04205	4.86884	5.30979	5.93464	6.5407	7.12795	7.6964	8.24605	8.7769	9.28895	9.78219	10.2566	10.7123	11.1491	11.7118	12.3245	14.3637	15.3158	17.3012	18.4466	20.8716	23.5706	26.0038	32.1249
646	0	0	0	0	0	0	0	0	0	0	0	0	0	0	0	0	0	0	0	0	0	0	0	0	0	0	0	0	0	0	0	0	0	0	0	0	0	0	0	0	0	0	0	0	0	0	0	0	0
654	0	0	0	0	0	0	0	0	0	0	0	0	0	0	0	0	0	0	0	0	0	0	0	0	0	0	0	0	0	0	0	0	0	0	0	0	0	0	0	0	0	0	0	0	0	0	0	0	0
659	0	0	0	0	0	0	0	0	0	0	0	0	0	0	0	0	0	0	0	0	0	0	0	0	0	0	0	0	0	0	0	0	0	0	0	0	0	0	0	0	0	0	0	0	0	0	0	0	0
660	0	0	0	0	0	0	0	0	0	0	0	0	0	0	0	0	0	0	0	0	0	0	0	0	0	0	0	0	0	0	0	0	0	0	0	0	0	0	0	0	0	0	0	0	0	0	0	0	0
662	0	0	0	0	0	0	0	0	0	0	0	0	0	0	0	0	0	0	0	0	0	0	0	0	0	0	0	0	0	0	0	0	0	0	0	0	0	0	0	0	0	0	0	0	0	0	0	0	0
666	0	0	0	0	0	0	0	0	0	0	0	0	0	0	0	0	0	0	0	0	0	0	0	0	0	0	0	0	0	0	0	0	0	0	0	0	0	0	0	0	0	0	0	0	0	0	0	0	0
670	0	0	0	0	0	0	0	0	0	0	0	0	0	0	0	0	0	0	0	0	0	0	0	0	0	0	0	0	0	0	0	0	0	0	0	0	0	0	0	0	0	0	0	0	0	0	0	0	0
674	0	0	0	0	0	0	0	0	0	0	0	0	0	0	0	0	0	0	0	0	0	0	0	0	0	0	0	0	0	0	0	0	0	0	0	0	0	0	0	0	0	0	0	0	0	0	0	0	0
678	0	0	0	0	0	0	0	0	0	0	0	0	0	0	0	0	0	0	0	0	0	0	0	0	0	0	0	0	0	0	0	0	0	0	0	0	0	0	0	0	0	0	0	0	0	0	0	0	0
682	0	0	0	0	0	0	0	0	0	0	0	0	0	0	0	0	0	0	0	0	0	0	0	0	0	0	0	0	0	0	0	0	0	0	0	0	0	0	0	0	0	0	0	0	0	0	0	0	0
686	0	0	0	0	0	0	0	0	0.0683171	0.0893377	0.116781	0.142542	0.173884	0.211988	0.258277	0.31446	0.382593	0.465139	0.565046	0.685835	0.831702	1.00764	1.21956	2.21171	4.00638	7.24838	13.0965	23.6293	23.5216	23.4221	23.3316	23.2512	23.1822	23.126	23.0845	23.0598	23.0545	23.0716	23.1151	23.1899	23.3022	23.46	23.674	23.9588	24.3346	24.8309	25.4921	27.1696	33.4581
690	0	0	0	0	0	0	0	0	0	0	0	0	0	0	0	0	0	0	0	0	0	0	0	0	0	0	0	0	0	0	0	0	0	0	0	0	0	0	0	0	0	0	0	0	0	0	0	0	0
694	0	0	1.87037e-06	3.67625e-06	7.22351e-06	1.4189e-05	2.78621e-05	5.46923e-05	0.000107321	0.000210514	0.000412772	0.000671766	0.00109263	0.00177609	0.00288521	0.00468378	0.00759812	0.0123166	0.0199494	0.0322853	0.0522026	0.0843272	0.136084	0.21937	0.353223	0.568048	0.912319	1.46315	1.60441	1.75898	1.92808	2.11302	2.31525	2.53631	2.7779	3.04184	3.33012	3.64488	3.98844	4.36332	4.77224	5.21812	5.70412	6.23366	9.53455	14.579	22.2855	34.0548	52.6005
702	0	0	0	0	0	0	0	0	0	0	0	0	0	0	0	0	0	0	0	0	0	0	0	0	0	0	0	0	0	0	0	0	0	0	0	0	0	0	0	0	0	0	0	0	0	0	0	0	0
703	0	0	0	0	0	0	0	0	0	0	0	0	0	0	0	0	0	0	0	0	0	0	0	0	0	0	0	0	0	0	0	0	0	0	0	0	0	0	0	0	0	0	0	0	0	0	0	0	0
704	0	0	0.0286892	0.0729401	0.185247	0.469948	1.19081	3.0137	7.61721	19.2263	48.4578	50.6987	53.0113	55.3945	57.8465	60.365	62.947	65.5887	68.2856	69.6607	70.8019	88.7866	105.302	120.366	133.998	146.216	175.267	201.394	218.202	234.464	250.181	265.354	279.983	294.07	307.615	320.618	333.081	345.005	356.389	367.236	405.087	441.487	476.437	509.939	541.996	643.727	741.452	835.177	935.185
705	0	0	0	0	0	0	0	0	0	0	0	0	0	0	0	0	0	0	0	0	0	0	0	0	0	0	0	0	0	0	0	0	0	0	0	0	0	0	0	0	0	0	0	0	0	0	0	0	0
706	0	0	0	0	0	0	0	0	0	0	0	0	0	0	0	0	0	0	0	0	0	0	0	0	0	0	0	0	0	0	0	0	0	0	0	0	0	0	0	0	0	0	0	0	0	0	0	0	0
710	0	0	0	0	0	0	0	0	0	0	0	0	0	0	0	0	0	0	0	0	0	0	0	0	0	0	0	0	0	0	0	0	0	0	0	0	0	0	0	0	0	0	0	0	0	0	0	0	0
716	0	0	4.05453e-06	8.9654e-06	1.98183e-05	4.37948e-05	9.67467e-05	0.000213649	0.00047164	0.00104078	0.00229585	0.00384313	0.00642947	0.0107498	0.0179617	0.0299917	0.0500433	0.0834381	0.139008	0.238036	0.398156	0.578858	0.840722	1.21974	1.76758	5.11669	8.0246	12.4901	12.3715	12.2694	12.1689	12.0703	11.9738	11.8796	11.7882	11.6999	11.6152	11.5348	11.4594	11.39	11.3278	11.2745	11.2321	11.2037	11.1934	11.2073	11.2549	11.3516	11.6534
724	0	0	0	0	0	0	0	0	0	0	0	0	0	0	0	0	0	0	0	0	15.5426	16.9474	20.056	26.4523	18.7408	21.3711	26.9306	24.39	27.1561	27.5332	27.9104	28.2873	28.6635	29.0389	29.413	29.7855	30.1559	30.524	30.8892	31.2512	32.8672	32.2853	34.6728	37.5725	38.9175	40.2897	41.415	41.5715	41.496
732	0	0	0	0	0	0	0	0	0	0	0	0	0	0	0	0	0	0	0	0	0	0	0	0	0	0	0	0	0	0	0	0	0	0	0	0	0	0	0	0	0	0	0	0	0	0	0	0	0
736	0	0	0	0	0	0	0	0	0	0	0	0	0	0	0	0	0	0	0	0	0	0	0	0	0	0	0	0	0	0	0	0	0	0	0	0	0	0	0	0	0	0	0	0	0	0	0	0	0
740	0	0	0	0	0	0	0	0	0	0	0	0	0	0	0	0	0	0	0	0	0	0	0	0	0	0	0	5.48114e-07	1.17994e-06	2.53963e-06	5.4651e-06	1.17582e-05	2.5293e-05	5.43964e-05	0.000116963	0.000251439	0.000540407	0.0011612	0.00249456	0.00526196	0.0110967	0.023395	0.0493103	0.103904	0.226984	0.495712	1.08226	2.36207	5.21087
744	0	0	0	0	0	0	0	0	0	0	0	0	0	0	0	0	0	0	0	0	0	0	0	0	0	0	0	0	0	0	0	0	0	0	0	0	0	0	0	0	0	0	0	0	0	0	0	0	0
748	0	0	4.8236e-07	1.0666e-06	2.35774e-06	5.21019e-06	1.15098e-05	2.54174e-05	5.61102e-05	0.00012382	0.000273132	0.000401397	0.000589552	0.000865377	0.00126943	0.0018609	0.002726	0.00399027	0.00583625	0.00935069	0.0148444	0.0258977	0.0438823	0.0727603	0.118621	0.190765	0.321698	0.66334	0.752374	0.794708	0.838857	0.884811	0.932544	0.982005	1.03312	1.08577	1.13982	1.19504	1.25119	1.30792	1.36478	1.42122	1.47651	1.52973	1.5797	1.62484	1.66309	1.6916	1.72535
752	0	0	0	0	0	0	0	0	0	0	0	0	0	0	0	0	0	0	0	0	0	0	0	0	0	0	0	0	0	0	0	0	0	0	0	0	0	0	0	0	0	0	0	0	0	0	0	0	0
756	0	0	0	0	0	0	0	0	0	0	0	0	0	0	0	0	0	0	0	0	0	0	0	0	0	0	0	0	0	0	0	0	0	0	0	0	0	0	0	0	0	0	0	0	0	0	0	0	0
760	0	0	0	0	0	0	0	0	0	0	0	0	0	0	0	0	0	0	0	0	0	0	0	0	0	0	0	0	0	0	0	0	0	0	0	0	0	0	0	0	0	0	0	0	0	0	0	0	0
762	0	0	8.07056e-05	0.0001388	0.000238638	0.000410159	0.000704728	0.00121044	0.0020783	0.00356707	0.00611998	0.00960426	0.0150635	0.0236114	0.0369862	0.0578982	0.0905693	0.14157	0.221114	0.33816	0.515532	0.783572	1.23701	1.93825	3.01688	4.66767	7.61747	12.2516	12.7998	13.1484	13.4963	13.842	14.184	14.5205	14.8496	15.1688	15.4756	15.7668	16.0388	16.2876	16.508	16.6941	16.839	16.9338	16.9679	16.9273	16.7942	16.5441	16.3216
764	0	0	0.0526385	0.112668	0.240817	0.513957	2.67706	8.28328	21.7144	52.359	184.552	198.003	210.546	222.183	232.915	242.744	251.673	259.704	266.839	273.082	278.436	323.319	364.623	402.362	436.546	467.192	505.546	539.502	536.428	538.876	541.232	543.494	545.657	547.717	549.668	551.507	553.229	554.828	582.598	609.219	634.691	659.017	682.195	771.297	856.953	939.166	1017.94	1093.27	1101.4
768	0	0	0.000103896	0.00020421	0.000401255	0.00078818	0.0015477	0.00303807	0.00596151	0.0116937	0.0229289	0.0383818	0.0642118	0.107359	0.179385	0.29953	0.499788	0.833306	1.38828	2.31093	3.84334	4.25724	4.71096	5.20743	5.74961	6.34042	6.9827	7.67909	7.60204	7.52439	7.44614	7.36728	7.2878	7.20772	7.12701	7.04569	6.96374	6.88117	6.79797	6.74798	6.69668	6.64403	6.59003	6.53465	6.55499	6.57345	6.58992	6.60433	6.6901
772	0	0	0	0	0	0	0	0	0	0	0	0	0	0	0	0	0	0	0	0	0	0	0	0	0	0	0	0	0	0	0	0	0	0	0	0	0	0	0	0	0	0	0	0	0	0	0	0	0
776	0	0	0	0	0	0	0	0	0	0	0	0	0	0	0	0	0	0	0	0	0	0	0	0	0	0	0	0	0	0	0	0	0	0	0	0	0	0	0	0	0	0	0	0	0	0	0	0	0
780	0	0	0	0	0	0	0	0	0	0	0	0	0	0	0	0	0	0	0	0	0	0	0	0	0	0	0.0019411	0.00373571	0.00552885	0.0081812	0.0121037	0.0179034	0.0264768	0.0391479	0.0578708	0.0855297	0.12638	0.186697	0.275737	0.407143	0.422117	0.467222	0.517008	0.648198	0.77465	1.05304	1.29321	1.58764	1.9466
784	0	0	0	0	0	0	0	0	0	0	0	0	0	0	0	0	0	0	0	0	0	0	0	0	0	0	0	0	0	0	0	0	0	0	0	0	0	0	0	0	0	0	0	0	0	0	0	0	0
788	0	0	0	0	0	0	0	0	0	0	0	0	0	0	0	0	0	0	0	0	0	0	0	0	0	0	0	0	0	0	0	0	0	0	0	0	0	0	0	0	0	0	0	0	0	0	0	0	0
792	0	0	0.000108	0.00023881	0.000527897	0.00246273	0.00610852	0.0126465	0.0372238	0.0821429	0.161065	0.255571	0.402898	0.547323	0.738647	0.989259	1.31302	2.10712	3.35089	5.38904	8.5821	9.12116	15.6219	26.1096	20.3198	21.128	26.0605	26.6444	26.5962	26.6171	26.6329	26.6436	26.6491	26.6491	26.6435	26.6321	26.6148	26.5915	26.5618	26.5257	27.0911	27.5733	28.0564	28.5402	29.0239	29.1488	29.2219	29.2858	29.6661
795	0	0	0.000547146	0.000940997	0.00161785	0.00278069	0.00477773	0.00820619	0.0140899	0.0241831	0.0414906	0.0651123	0.102123	0.160074	0.250749	0.392522	0.614017	0.959777	1.49905	2.25163	3.37591	3.50301	3.61544	3.7132	3.83113	4.03277	4.53381	4.83015	5.0859	5.2959	5.51354	5.73902	5.97253	6.21427	6.46445	6.72324	6.99083	7.2674	7.55313	7.84817	8.15269	8.46681	8.79068	9.1244	9.46807	9.82176	10.1855	10.5594	11.065
796	0	0	0	0	0	0	0	0	0	0	0	0	0	0	0	0	0	0	0	0	0	0	0	0	0	0	0	0	0	0	0	0	0	0	0	0	0	0	0	0	0	0	0	0	0	0	0	0	0
798	0	0	0	0	0	0	0	0	0	0	0	0	0	0	0	0	0	0	0	0	0	0	0	0	0	0	0	0	0	0	0	0	0	0	0	0	0	0	0	0	0	0	0	0	0	0	0	0	0
800	0	0	0	0	0	0	0	0	0	0	0	0	0	0	0	0	0	0	0	0	0	0	0	0	0	0	0	0	0	0	0	0	0	0	0	0	0	0	0	0	0	0	0	0	0	0	0	0	0
804	0	0	0	0	0	0	0	0	0	0	0	0	0	0	0	0	0	0	0	0	0	0	0	0	0	0	0	0	0	0	0	0	0	0	0	0	0	0	0	0	0	0	0	0	0	0	0	0	0
807	0	0	0	0	0	0	0	0	0	0	0	0	0	0	0	0	0	0	0	0	0	0	0	0	0	0	0	0	0	0	0	0	0	0	0	0	0	0	0	0	0	0	0	0	0	0	0	0	0
818	0	0	0	0	0	0	0	0	14.0921	27.6421	81.3004	85.3415	89.0956	81.2286	73.6486	62.7687	52.367	57.7233	62.6969	70.4922	77.7136	65.5305	58.345	66.3076	55.2006	52.6061	63.3665	54.8777	52.9428	51.0404	49.1705	47.3331	45.5282	43.7559	42.016	40.3087	38.6339	36.9917	40.5851	44.0485	47.3819	50.5851	53.6582	46.9917	52.7946	59.2964	80.976	55	132.132
826	0	0	0	0	0	0	0	0	0	0	0	0	0	0	0	0	0	0	0	0	0	0	0	0	0	0	0	0	0	0	0	0	0	0	0	0	0	0	0	0	0	0	0	0	0	0	0	0	0
834	0	0	0.000213384	0.000413271	0.000806255	0.00158523	0.00314247	0.00628268	0.0126707	0.0257795	0.0529136	0.0921648	0.160443	0.279139	0.485347	0.84334	1.46438	2.54093	4.40554	7.48623	12.4504	19.2323	25.5593	31.4314	36.8485	23.0453	26.966	30.5275	30.5262	30.4615	30.4064	30.3623	30.3304	30.3124	30.3101	30.326	30.3628	30.4238	30.5131	30.6359	30.7987	31.0101	31.2809	31.6261	32.0663	32.631	33.3645	34.3368	36.0633
840	0	0	0	0	0	0	0	0	0	0	0	0	0	0	0	0	0	0	0	0	0	0	0	0	0	0	0	4.57661e-06	1.33732e-05	3.49516e-05	8.58442e-05	0.000202632	0.000465272	0.00104681	0.00231863	0.00507227	0.0109845	0.0276601	0.0705321	0.180015	0.462631	1.18507	3.07877	8.11585	19.4963	49.7472	121.995	160.6	294.84
850	0	0	0	0	0	0	0	0	0	0	0	0	0	0	0	0	0	0	0	0	0	0	0	0	0	0	0	0	0	0	0	0	0	0	0	0	0	0	0	0	0	0	0	0	0	0	0	0	0
854	0	0	0.000176379	0.00039001	0.000862127	0.00190515	0.00420864	0.00929409	0.0205171	0.0452758	0.0998731	0.165789	0.27505	0.45604	0.755642	1.25122	2.07036	3.42318	5.65549	9.33565	15.3969	16.9129	18.5594	20.3443	22.2753	24.3596	26.6036	29.013	28.7219	28.5959	28.4765	28.3647	28.2613	28.1674	28.0843	28.0137	27.9574	27.9177	27.8973	27.8999	27.9297	27.9924	28.0954	28.2486	28.4656	28.7659	29.1783	29.748	30.8909
858	0	0	0	0	0	0	0	0	0	0	0	0	0	0	0	0	0	0	0	0	0	0	0	0	0	0	0	8.99567e-09	1.86857e-08	3.88068e-08	8.05793e-08	1.67285e-07	3.47218e-07	7.20542e-07	1.49495e-06	3.10097e-06	6.43093e-06	1.33337e-05	2.7639e-05	5.72782e-05	0.000152196	0.000399311	0.00104737	0.00370614	0.0105235	0.0279807	0.0812846	0.212966	0.481839
860	0	0	0.000995023	0.00171127	0.00294218	0.00505687	0.00868863	0.0149235	0.0256234	0.0439786	0.0754535	0.118411	0.185718	0.291106	0.456005	0.713829	1.11663	1.74542	2.72612	4.1381	6.26552	6.54505	6.7946	7.01417	7.20374	7.42223	8.17409	8.84884	9.29608	9.67992	10.0777	10.4899	10.9167	11.3585	11.8158	12.2888	12.7779	13.2835	13.8057	14.345	14.9016	15.4758	16.0677	16.6777	17.3059	17.9524	18.6173	19.3006	20.2247
862	0	0	0	0	0	0	0	0	0	0	0	0	0	0	0	0	0	0	0	0	0	0	0	0	0	0	0	1.72457e-07	3.44624e-07	6.8854e-07	1.37541e-06	2.74695e-06	5.48508e-06	1.09503e-05	2.18565e-05	4.36153e-05	8.70163e-05	0.000173565	0.000346117	0.000836285	0.00202012	0.00487849	0.0117782	0.0284282	0.0628794	0.139039	0.310318	0.623599	1.25373
876	0	0	0	0	0	0	0	0	0	0	0	0	0	0	0	0	0	0	0	0	0	0	0	0	0	0	0	0	0	0	0	0	0	0	0	0	0	0	0	0	0	0	0	0	0	0	0	0	0
882	0	0	0	0	0	0	0	0	0	0	0	0	0	0	0	0	0	0	0	0	0	0	0	0	0	0	0	0	0	0	0	0	0	0	0	0	0	0	0	0	0	0	0	0	0	0	0	0	0
887	0	0	0	0	0	0	0	0	0	0	0	0	0	0	0	0	0	0	0	0	0	0	0	0	0	0	0	0	0	0	0	0	0	0	0	0	0	0	0	0	0	0	0	0	0	0	0	0	0
891	0	0	0	0	0	0	0	0	0	0	0	0	0	0	0	0	0	0	0	0	0	0	0	0	0	0	0	0	0	0	0	0	0	0	0	0	0	0	0	0	0	0	0	0	0	0	0	0	0
894	0	0	0	0	0	0	0	0	0	0	0	0	0	0	0	0	0	0	0	0	0	0	0	0	0	0	0	0	0	0	0	0	0	0	0	0	0	0	0	0	0	0	0	0	0	0	0	0	0
[truncated: 107 more columns]

## Sheet: 2grid
ISO1	y-10000	y-9000	y-8000	y-7000	y-6000	y-5000	y-4000	y-3000	y-2000	y-1000	y0	y100	y200	y300	y400	y500	y600	y700	y800	y900	y1000	y1100	y1200	y1300	y1400	y1500	y1600	y1700	y1710	y1720	y1730	y1740	y1750	y1760	y1770	y1780	y1790	y1800	y1810	y1820	y1830	y1840	y1850	y1860	y1870	y1880	y1890	y1900	y1910
4	0	0	3.00437e-05	6.23985e-05	0.000129597	0.000269163	0.00164862	0.00434025	0.00931134	0.0181685	0.0545054	0.0919779	0.153296	0.229945	0.344917	0.517376	0.776064	1.12917	1.64137	2.40968	3.53594	5.59857	8.83985	9.28184	14.9172	23.8676	44.7517	67.1276	68.3724	69.5021	70.6424	71.7929	72.9533	74.1231	75.3017	76.4885	77.6829	78.8842	80.0916	81.3043	83.3643	87.3125	91.4306	95.7243	100.199	106.42	114.276	122.681	131.672
8	0	0	0	0	0	0	0	0	0	0	0	0	0	0	0	0	0	0	0	0	0.368442	0.368442	0.368442	0.368442	0.368442	0.368442	0.368442	0.552663	0.573695	0.594727	0.615759	0.636791	0.657823	0.678855	0.699887	0.720918	0.74195	0.762982	0.784014	0.805046	0.818844	0.868471	0.921105	1.01598	1.11085	1.22415	1.33744	1.47377	1.61009
12	0	0	0	0	0	0	0	0	0	0	0	0	0	0	0	0	0	0	0	0	0	0	0	0	0	0	0	0	0	0	0	0	0	0	0	0	0	0	0	0	0	0	0	0	0	0	0	0	0
16	0	0	0	0	0	0	0	0	0	0	0	0	0	0	0	0	0	0	0	0	0	0	0	0	0	0	0	0	0	0	0	0	0	0	0	0	0	0	0	0	0	0	0	0	0	0	0	0	0
20	0	0	0	0	0	0	0	0	0	0	0	0	0	0	0	0	0	0	0	0	0	0	0	0	0	0	0	0	0	0	0	0	0	0	0	0	0	0	0	0	0	0	0	0	0	0	0	0	0
24	0	0	3.56153e-06	8.90381e-06	2.22595e-05	5.56488e-05	0.000139122	0.000347805	0.000869513	0.00217378	0.00543446	0.0108689	0.0217378	0.0434757	0.0869513	0.173903	0.347805	0.69561	1.39122	2.71288	5.0084	5.84313	6.67786	7.51259	8.76469	10.0168	10.6428	11.2689	5.35219	5.42681	5.5058	5.58965	5.67889	5.77416	5.87622	5.98596	6.10446	6.23302	6.37323	6.52708	6.69709	6.88646	7.09945	7.34172	7.62117	7.94907	8.34235	8.82788	9.45169
28	0	0	0	0	0	0	0	0	0	0	0	0	0	0	0	0	0	0	0	0	0	0	0	0	0	0	0	0	0	0	0	0	0	0	0	0	0	0	0	0	0	0	0	0	0	0	0	0	0
31	0	0	0	0	0	0	0	0	0	0	0.000451894	0.000726258	0.0011672	0.00187586	0.00301477	0.00484517	0.00778687	0.0125146	0.0201128	0.0318854	0.0504024	0.0756036	0.100805	0.126006	0.100805	0.126006	0.151207	0.176408	0.114933	0.124511	0.134887	0.146128	0.158305	0.171497	0.185788	0.201271	0.218043	0.236213	0.255898	0.277223	0.300325	0.325352	0.352464	0.381836	0.413656	0.448127	0.485471	0.525927	0.569755
32	0	0	0	0	0	0	0	0	0	0	0	0	0	0	0	0	0	0	0	0	0	0	0	0	0	0	0	0.000162879	0.000325758	0.000651517	0.00130303	0.00260607	0.00521213	0.0104243	0.0208485	0.0416971	0.0833941	0.166788	0.463675	0.592473	0.757049	0.967341	1.23605	1.57939	2.10586	3.02309	3.94031	5.54755	8
36	0	0	0	0	0	0	0	0	0	0	0	0	0	0	0	0	0	0	0	0	0	0	0	0	0	0	0	0	0	0	0	0	0	0	0	0	0	0.209478	0.191868	0.182363	0.198144	0.254695	0.473283	1.00157	1.48965	1.93366	2.67071	3.19483	3.77879
40	0	0	0	0	0	0	0	0	0	0	0	0	0	0	0	0	0	0	0	0	0	0	0	0	0	0	0	0	0	0	0	0	0	0	0	0	0	0	0	0	0	0	0	0	0	0	0	0	0
44	0	0	0	0	0	0	0	0	0	0	0	0	0	0	0	0	0	0	0	0	0	0	0	0	0	0	0	0	0	0	0	0	0	0	0	0	0	0	0	0	0	0	0	0	0	0	0	0	0
48	0	0	0	0	0	0	0	0	0	0	0	0	0	0	0	0	0	0	0	0	0	0	0	0	0	0	0	0	0	0	0	0	0	0	0	0	0	0	0	0	0	0	0	0	0	0	0	0	0
50	0	0	0	2.08343	3.3172	5.27002	8.35229	13.202	20.8059	32.6809	51.1419	54.5453	57.8997	61.9427	65.9269	69.8525	73.7193	81.1167	88.4065	98.4209	108.289	111.725	115.103	114.291	128.518	135.743	175.194	214.058	219.589	223.907	228.309	232.798	237.375	242.041	246.799	251.651	256.598	261.642	333.481	430.908	556.797	719.465	929.655	1201.25	1565.69	2040.69	2767.56	3079.2	3148.21
51	0	0	0	0	0	0	0	0	0	0	0	0	0	0	0	0	0	0	0	0	0	0	0	0	0	0	0	0	0	0	0	0	0	0	0	0	0	0	0	0	0	0	0	0	0	0	0	0	0
52	0	0	0	0	0	0	0	0	0	0	0	0	0	0	0	0	0	0	0	0	0	0	0	0	0	0	0	0	0	0	0	0	0	0	0	0	0	0	0	0	0	0	0	0	0	0	0	0	0
56	0	0	0	0	0	0	0	0	0	0	0	0	0	0	0	0	0	0	0	0	0	0	0	0	0	0	0	0	0	0	0	0	0	0	0	0	0	0	0	0	0	0	0	0	0	0	0	0	0
60	0	0	0	0	0	0	0	0	0	0	0	0	0	0	0	0	0	0	0	0	0	0	0	0	0	0	0	0	0	0	0	0	0	0	0	0	0	0	0	0	0	0	0	0	0	0	0	0	0
64	0	0	0.000594817	0.00111528	0.0013941	0.00174263	0.00217828	0.00272286	0.00340357	0.00425446	0.00531808	0.00797712	0.0119657	0.0179485	0.0269228	0.0403842	0.0605762	0.0908644	0.136297	0.136297	0.136297	0.136297	0.136297	0.149926	0.163556	0.204445	0.272593	0.340741	0.372174	0.379066	0.386086	0.393236	0.400518	0.407935	0.415489	0.423184	0.43102	0.439002	0.558915	0.759395	1.03179	1.40188	1.90473	2.58795	3.59438	4.9922	6.93361	7.94997	8.42153
68	0	0	0	0	0	0	0	0	0	0	0	0	0	0	0	0	0	0	0	0	0	0	0	0	0	0	0	0.00276961	0.00564473	0.0115045	0.0234473	0.0477877	0.097396	0.198502	0.404566	0.824545	1.6805	3.42502	6.98052	8.28773	9.83974	9.96483	10.0899	12.0466	10.3577	8.66877	14.1402	12.3617	14.2403
70	0	0	0	0	0	0	0	0	0	0	0	0	0	0	0	0	0	0	0	0	0	0	0	0	0	0	0	0	0	0	0	0	0	0	0	0	0	0	0	0	0	0	0	0	0	0	0	0	0
72	0	0	0	0	0	0	0	0	0	0	0	0	0	0	0	0	0	0	0	0	0	0	0	0	0	0	0	0	0	0	0	0	0	0	0	0	0	0	0	0	0	0	0	0	0	0	0	0	0
76	0	0	0	0	0	0	0	0	0	0	0	0	0	0	0	0	0	0	0	0	0	0	0	0	0	0	0	3.81885e-06	8.78627e-06	2.03198e-05	4.72417e-05	0.00011042	0.000259473	0.000612969	0.00145561	0.00347421	0.00833283	0.0200799	0.0514229	0.126305	0.320791	0.778832	1.83425	4.22658	9.58254	21.3205	52.9683	128.36	323.605
84	0	0	0	0	0	0	0	0	0	0	0	0	0	0	0	0	0	0	0	0	0	0	0	0	0	0	0	3.24393e-09	7.01965e-09	1.51901e-08	3.28703e-08	7.11292e-08	1.53919e-07	3.3307e-07	7.20742e-07	1.55964e-06	3.37496e-06	7.30318e-06	1.58036e-05	3.26608e-05	6.7499e-05	0.000139498	0.000288296	0.000595811	0.00134057	0.00301629	0.00678666	0.01527	0.0343575
86	0	0	0	0	0	0	0	0	0	0	0	0	0	0	0	0	0	0	0	0	0	0	0	0	0	0	0	0	0	0	0	0	0	0	0	0	0	0	0	0	0	0	0	0	0	0	0	0	0
90	0	0	4.60141e-10	8.62763e-10	1.61768e-09	3.03315e-09	5.68716e-09	1.06634e-08	1.99939e-08	3.74886e-08	7.02911e-08	1.58155e-07	3.55849e-07	8.0066e-07	1.80149e-06	4.05334e-06	9.12002e-06	2.052e-05	4.61701e-05	0.000103883	0.000233736	0.000525906	0.00118329	0.0026624	0.0059904	0.0134784	0.0303264	0.0682344	0.0841853	0.10381	0.127934	0.157566	0.193927	0.238499	0.293071	0.359796	0.441259	0.54054	0.661297	0.682169	0.702501	0.72201	0.740339	0.757038	0.756124	0.752091	0.744166	0.731285	0.711916
92	0	0	0	0	0	0	0	0	0	0	0	0	0	0	0	0	0	0	0	0	0	0	0	0	0	0	0	0	0	0	0	0	0	0	0	0	0	0	0	0	0	0	0	0	0	0	0	0	0
96	0	0	1.90934e-08	3.58002e-08	6.71253e-08	1.2586e-07	2.35987e-07	4.42477e-07	8.29644e-07	1.55558e-06	2.91672e-06	6.56261e-06	1.47659e-05	3.32232e-05	7.47522e-05	0.000168193	0.000378433	0.000851475	0.00191582	0.00287373	0.00431059	0.00775906	0.0193977	0.0320061	0.0523737	0.0654671	0.122751	0.220951	0.228789	0.249054	0.27111	0.295115	0.321242	0.349676	0.380621	0.414299	0.450949	0.490835	0.53424	0.561072	0.589242	0.618817	0.649865	0.68246	0.694739	0.707226	0.7536	0.799733	0.845623
100	0	0	0	0	0	0	0	0	0	0	0	0	0	0	0	0	0	0	0	0	1.05606	1.14846	1.22766	1.32007	0.726038	1.05606	1.65009	1.65009	1.70603	1.78727	1.87238	1.96154	2.05495	2.1528	2.25532	2.36271	2.47522	2.59309	2.71657	2.84603	2.93655	3.09111	3.2538	3.31056	3.36739	3.92515	4.5027	4.29239	5.01888
104	0	0	0	0.00578422	0.00932148	0.0150043	0.0241214	0.0387261	0.062083	1.0014	2.79633	3.06273	3.32671	3.58829	3.84746	4.10422	4.35858	4.61053	4.86007	5.1072	5.35193	6.65982	7.95568	7.65558	9.06598	10.4631	11.7169	12.9585	13.2116	13.4644	13.7169	13.9692	14.2213	14.4731	14.7247	14.9761	15.2272	15.478	16.5022	17.5254	17.3884	175.477	333.417	491.209	648.854	806.351	1143.13	2221	2583.76
108	0	0	1.10782e-08	2.21565e-08	4.43129e-08	8.86259e-08	1.77252e-07	3.54504e-07	7.09007e-07	1.41801e-06	2.83603e-06	6.1877e-06	1.35004e-05	2.94555e-05	6.42665e-05	0.000140218	0.00030593	0.000667483	0.00145633	0.00273061	0.0049151	0.00897007	0.0158512	0.027371	0.0464477	0.0777585	0.128302	0.209948	0.213403	0.21598	0.218701	0.22158	0.224635	0.227885	0.231356	0.235075	0.239076	0.243399	0.248096	0.253227	0.25887	0.265126	0.272123	0.280037	0.289106	0.299672	0.312241	0.327613	0.34714
112	0	0	0	0	0	0	0	0	0	0	0	0	0	0	0	0	0	0	0	0	0	0	0	0	0	0	0	0	0	0	0	0	0	0	0	0	0	0	0	0	0	0	0	0	0	0	0	0	0
116	0	0	0	0	1.1815	2.51286	5.35727	11.4503	24.5378	52.7282	113.623	121.77	130.498	139.85	149.869	160.603	172.103	184.422	197.619	207.668	217.619	238.304	258.793	279.087	299.184	319.087	352.556	385.703	390.088	394.469	398.846	403.219	407.587	411.951	416.311	420.667	425.018	429.366	433.709	438.047	446.181	456.591	467.244	478.145	489.3	521.681	558.682	598.307	640.743
120	0	0	6.76399e-06	1.5219e-05	3.42427e-05	7.70461e-05	0.000173354	0.000390046	0.000877603	0.00197461	0.00444287	0.00761634	0.0130566	0.0223827	0.0383704	0.0657778	0.112762	0.193306	0.331382	0.568083	0.973857	1.11298	1.27198	1.45369	1.66136	1.89869	2.16994	2.47993	2.46087	2.48468	2.50978	2.5363	2.56438	2.59422	2.62601	2.65999	2.69648	2.7358	2.77841	2.82481	2.87569	2.93189	2.9945	3.06499	3.14537	3.23848	3.3485	3.48198	3.64987
124	0	0	0	0	0	0	0	0	0	0	0	0	0	0	0	0	0	0	0	0	0	0	0	0	0	0	0	0	0	0	0	0	0	0	0	0	0	0	0	0	0	0	0	0	0	0	0	0	0
132	0	0	0	0	0	0	0	0	0	0	0	0	0	0	0	0	0	0	0	0	0	0	0	0	0	0	0	0	0	0	0	0	0	0	0	0	0	0	0	0	0	0	0	0	0	0	0	0	0
136	0	0	0	0	0	0	0	0	0	0	0	0	0	0	0	0	0	0	0	0	0	0	0	0	0	0	0	0	0	0	0	0	0	0	0	0	0	0	0	0	0	0	0	0	0	0	0	0	0
140	0	0	8.03072e-06	1.80691e-05	4.06555e-05	9.1475e-05	0.000205819	0.000463092	0.00104196	0.0023444	0.00527491	0.0083288	0.0131507	0.0207643	0.0327858	0.051767	0.0817374	0.129059	0.203777	0.321754	0.508032	0.534771	0.562917	0.592544	0.62373	0.656558	0.691114	0.727488	0.729922	0.740724	0.75217	0.76433	0.777284	0.791129	0.805976	0.821959	0.839237	0.858006	0.878504	0.90103	0.92596	0.953778	0.985123	1.02085	1.06216	1.11075	1.16922	1.24164	1.3351
144	0	0	0.0463225	0.0840737	0.152424	0.276018	0.499202	0.901631	1.62611	2.92812	5.26366	6.1145	6.95779	7.79353	8.62171	9.44235	10.2554	11.061	11.8589	12.6494	13.4322	15.0433	16.6392	16.0668	15.334	16.4127	20.4214	24.3924	24.5146	24.0227	23.5408	23.0684	22.6056	22.152	21.7076	21.272	20.8452	20.4269	20.0171	19.6154	22.934	28.6541	35.8009	40.3762	44.9472	44.5034	139.36	174.599	176.442
148	0	0	1.44731e-05	2.89462e-05	5.78925e-05	0.000115785	0.00023157	0.00046314	0.00092628	0.00185256	0.00370512	0.00635163	0.0108885	0.018666	0.0319989	0.0548553	0.0940376	0.161207	0.276355	0.437563	0.690888	1.11406	1.78767	2.93565	4.90674	7.86965	13.7719	23.6089	24.0725	23.9514	23.8265	23.6978	23.5649	23.4274	23.2852	23.1378	22.9849	22.826	22.6607	22.4884	22.3086	22.1207	21.9241	21.7183	21.503	21.2782	21.0448	20.8059	20.5695
152	0	0	0	0	0	0	0	0	0	0	0	0	0	0	0	0	0	0	0	0	0	0	0	0	0	0	0	1.40491e-07	2.88377e-07	5.91931e-07	1.21502e-06	2.49398e-06	5.11923e-06	1.05079e-05	2.15688e-05	4.42728e-05	9.08758e-05	0.000186535	0.000382887	0.000845959	0.00186908	0.0041296	0.0102154	0.0256812	0.0605357	0.140874	0.319378	0.717302	1.6564
156	0	0	0.619526	1.49922	3.62408	8.75027	21.1008	50.8149	122.194	176.027	1129.41	997.448	834.142	421.533	575.337	711.59	955.211	789.652	617.683	744.988	688.813	1690.87	1924.79	1487.48	1319.99	1683.88	1801.91	1819.72	1903.44	2185.24	2322.46	2612.46	3257.18	3597.63	4017.46	5029.3	5447.44	5322.7	6230.01	6424.02	7070.64	7476.95	7807.06	7671.18	6506.44	6580.09	6783.5	7224	7636.2
158	0	0	0.0110135	0.0213217	0.0412328	0.0796445	0.153647	0.296009	0.56945	1.09376	2.09725	2.19789	2.29759	2.39633	2.49413	2.59098	2.68688	2.78183	2.87584	2.96889	3.061	3.78259	4.53932	5.33062	6.15591	7.01463	7.18747	36.7921	41.9513	44.2609	46.6972	49.2673	51.9784	54.8384	57.8552	61.0375	64.3943	67.9353	71.6705	75.6104	77.8914	80.7553	83.724	86.6729	89.6336	92.7978	95.9747	110.187	292.573
162	0	0	0	0	0	0	0	0	0	0	0	0	0	0	0	0	0	0	0	0	0	0	0	0	0	0	0	0	0	0	0	0	0	0	0	0	0	0	0	0	0	0	0	0	0	0	0	0	0
166	0	0	0	0	0	0	0	0	0	0	0	0	0	0	0	0	0	0	0	0	0	0	0	0	0	0	0	0	0	0	0	0	0	0	0	0	0	0	0	0	0	0	0	0	0	0	0	0	0
170	0	0	0	0	0	0	0	0	0	0	0	0	0	0	0	0	0	0	0	0	0	0	0	0	0	0	0	1.76583e-07	3.77887e-07	8.05217e-07	1.70932e-06	3.61641e-06	7.62837e-06	1.60478e-05	3.36779e-05	7.05201e-05	0.000147369	0.000307395	0.000579982	0.00109035	0.00259302	0.00622325	0.0149358	0.0322367	0.0692037	0.166673	0.389878	0.925339	2.26359
174	0	0	0	0	0	0	0	0	0	0	0	0	0	0	0	0	0	0	0	0.00836372	0.0250912	0.0451641	0.0790372	0.135492	0.228643	0.381072	0.71451	1.28612	1.27807	1.36766	1.46351	1.56608	1.67583	1.79326	1.91891	2.05335	2.1972	2.35112	2.5158	2.69201	2.88055	3.08227	3.29811	3.52904	3.77612	4.04048	4.32332	4.62594	4.94971
175	0	0	0	0	0	0	0	0	0	0	0	0	0	0	0	0	0	0	0	0	0	0	0	0	0	0	0	0	0	0	0	0	0	0	0	0	0	0	0	0	0	0	0	0	0	0	0	0	0
178	0	0	2.88589e-06	5.77177e-06	1.15435e-05	2.30871e-05	4.61742e-05	9.23484e-05	0.000184697	0.000369393	0.000738787	0.00126649	0.00217113	0.00372194	0.00638046	0.0109379	0.0187507	0.0321441	0.0551042	0.0944644	0.161939	0.27761	0.475902	0.815832	1.39857	2.39755	4.11008	7.04586	6.9905	6.96113	6.93076	6.89934	6.86677	6.83296	6.79782	6.76123	6.72307	6.68317	6.64139	6.59752	6.55135	6.50263	6.45106	6.39634	6.3381	6.27597	6.20962	6.13896	6.06455
180	0	0	0.000139373	0.000268449	0.000517593	0.000998989	0.00193011	0.00373296	0.00722731	0.0140072	0.0271756	0.053116	0.103955	0.203711	0.399676	0.785056	1.54372	3.03868	5.98727	10.1035	16.8392	19.6457	22.4523	25.2588	29.4686	33.6784	35.7833	37.8882	38.1874	38.4338	38.6926	38.9651	39.2526	39.5569	39.8798	40.2236	40.591	40.985	41.4098	41.8699	42.3713	42.9216	43.5304	44.2106	44.9794	45.8614	46.892	48.126	49.6538
184	0	0	0	0	0	0	0	0	0	0	0	0	0	0	0	0	0	0	0	0	0	0	0	0	0	0	0	0	0	0	0	0	0	0	0	0	0	0	0	0	0	0	0	0	0	0	0	0	0
188	0	0	0	0	0	0	0	0	0	0	0	0	0	0	0	0	0	0	0	0	0	0	0	0	0	0	0	3.91274e-07	8.46691e-07	1.83218e-06	3.96472e-06	8.5794e-06	1.85653e-05	4.0174e-05	8.6934e-05	0.000188119	0.000407078	0.00088089	0.0019686	0.00439679	0.0103875	0.0248622	0.0581514	0.133493	0.337957	0.866643	2.11474	5.43348	3
191	0	0	0	0	0	0	0	0	0	0	0	0	0	0	0	0	0	0	0	0	0	0	0	0	0	0	0	0	0	0	0	0	0	0	0	0	0	0	0	0	0	0	0	0	0	0	0	0	0
192	0	0	0	0	0	0	0	0	0	0	0	0	0	0	0	0	0	0	0	0	0	0	0	0	0	0	0	1.27922e-07	2.9731e-07	6.90992e-07	1.60597e-06	3.73251e-06	8.67491e-06	2.01618e-05	4.6859e-05	0.000108907	0.000253117	0.000588281	0.00136725	0.0031777	0.00797356	0.0199339	0.0498348	0.105762	0.22371	0.478736	1.02586	2.19828	5.78139
196	0	0	0	0	0	0	0	0	0	0	0	0	0	0	0	0	0	0	0	0	0	0	0	0	0	0	0	0	0	0	0	0	0	0	0	0	0	0	0	0	0	0	0	0	0	0	0	0	0
203	0	0	0	0	0	0	0	0	0	0	0	0	0	0	0	0	0	0	0	0	0	0	0	0	0	0	0	0	0	0	0	0	0	0	0	0	0	0	0	0	0	0	0	0	0	0	0	0	0
204	0	0	4.50168e-06	1.12542e-05	2.81355e-05	7.03387e-05	0.000175847	0.000439617	0.00109904	0.0027476	0.00686901	0.0117754	0.0201865	0.0346054	0.0593235	0.101698	0.174339	0.298866	0.512342	0.878301	1.50566	1.72075	1.96657	2.24751	2.52845	2.80939	2.90304	2.78753	2.5731	2.37517	2.19247	2.02381	1.86814	1.72443	1.59178	1.46934	1.35631	1.25198	1.15568	1.08345	1.01573	0.952247	0.892732	0.836936	0.854017	0.871445	0.88923	0.907378	0.925896
208	0	0	0	0	0	0	0	0	0	0	0	0	0	0	0	0	0	0	0	0	0	0	0	0	0	0	0	0	0	0	0	0	0	0	0	0	0	0	0	0	0	0	0	0	0	0	0	0	0
212	0	0	0	0	0	0	0	0	0	0	0	0	0	0	0	0	0	0	0	0	0	0	0	0	0	0	0	0	0	0	0	0	0	0	0	0	0	0	0	0	0	0	0	0	0	0	0	0	0
214	0	0	0	0	0	0	0	0	0	0	0	0	0	0	0	0	0	0	0	0	0	0	0	0	0	0	0	2.47416	2.55607	2.64014	2.72638	2.81479	2.90534	2.99804	3.09285	3.18973	3.28863	3.38948	3.49221	3.69948	3.91748	4.14656	4.387	4.63909	6.0062	7.77164	10.1016	13.0374	16.195
218	0	0	0	0	0	0	0	0	0	0	0	0	0	0	0	0	0	0	0	0	0	0	0	0	0	0	0	1.5862e-07	3.17276e-07	6.34622e-07	1.26938e-06	2.53905e-06	5.07866e-06	1.01585e-05	2.03192e-05	4.06429e-05	8.12948e-05	0.000162608	0.000325251	0.000650575	0.00162579	0.00371608	0.00849391	0.0190384	0.0421781	0.0963496	0.211969	0.466332	1.07723
222	0	0	0	0	0	0	0	0	0	0	0	0	0	0	0	0	0	0	0	0	0	0	0	0	0	0	0.320712	0.349867	0.353771	0.35878	0.365318	0.373992	0.385669	0.401603	0.423611	0.497823	0.572034	0.646246	0.720458	0.79467	0.920707	1.04674	1.17278	1.37465	1.57652	1.88809	2.19966	2.51122	3.21121
226	0	0	0	0	0	0	0	0	0	0	0	0	0	0	0	0	0	0	0	0	0	0	0	0	0	0	0	0	0	0	0	0	0	0	0	0	0	0	0	0	0	0	0	0	0	0	0	0	0
231	0	0	0	0	0	0	0	0	0	0	0	0	0	0	0	0	0	0	0	0	0	0	0	0	0	0	0	0	0	0	0	0	0	0	0	0	0	0	0	0	0	0	0	0	0	0	0	0	0
232	0	0	0	0	0	0	0	0	0	0	0	0	0	0	0	0	0	0	0	0	0	0	0	0	0	0	0	0	0	0	0	0	0	0	0	0	0	0	0	0	0	0	0	0	0	0	0	0	0
233	0	0	0	0	0	0	0	0	0	0	0	0	0	0	0	0	0	0	0	0	0	0	0	0	0	0	0	0	0	0	0	0	0	0	0	0	0	0	0	0	0	0	0	0	0	0	0	0	0
234	0	0	0	0	0	0	0	0	0	0	0	0	0	0	0	0	0	0	0	0	0	0	0	0	0	0	0	0	0	0	0	0	0	0	0	0	0	0	0	0	0	0	0	0	0	0	0	0	0
238	0	0	0	0	0	0	0	0	0	0	0	0	0	0	0	0	0	0	0	0	0	0	0	0	0	0	0	0	0	0	0	0	0	0	0	0	0	0	0	0	0	0	0	0	0	0	0	0	0
242	0	0	0	0	0	0	0	0	0	0	0	0	0	0	0	0	0	0	0	0	0	0	0	0	0	0	0	0	0	0	0	0	0	0	0	0	0	0	0	0	0	0	0	0	0	0	0	0	4
246	0	0	0	0	0	0	0	0	0	0	0	0	0	0	0	0	0	0	0	0	0	0	0	0	0	0	0	0	0	0	0	0	0	0	0	0	0	0	0	0	0	0	0	0	0	0	0	0	0
250	0	0	0	0	0	0	0	0	0	0	0	0	0	0	0	0	0	0	0	0	3.10265	5.53942	7.48608	11.4204	7.89761	10.7419	13.2324	15.8896	16.3235	16.7573	17.1911	17.6249	18.0588	18.4752	18.8916	19.3081	19.7245	20.1409	21.5755	22.828	23.7466	24.9403	26.1207	26.7166	27.163	28.0576	28.7334	29.2757	29.825
254	0	0	0	0	0	0	0	0	0	0	0	0	0	0	0	0	0	0	0	0	0	0	0	0	0	0	0	0.0386267	0.0423762	0.0464662	0.0509232	0.0557745	0.0610485	0.066774	0.0729796	0.0796935	0.0869422	0.0947492	0.103134	0.112109	0.121677	0.131827	0.142529	0.153725	0.165316	0.177152	0.188998	0.2005	0.211117
258	0	0	0	0	0	0	0	0	0	0	0	0	0	0	0	0	0	0	0	0	0	0	0	0	0	0	0	0	0	0	0	0	0	0	0	0	0	0	0	0	0	0	0	0	0	0	0	0	0
262	0	0	0	0	0	0	0	0	0	0	0	0	0	0	0	0	0	0	0	0	0	0	0	0	0	0	0	0	0	0	0	0	0	0	0	0	0	0	0	0	0	0	0	0	0	0	0	0	0
266	0	0	6.40505e-07	1.44114e-06	3.24256e-06	7.29576e-06	1.64155e-05	3.69348e-05	8.31032e-05	0.000186982	0.00042071	0.000721217	0.00123637	0.0021195	0.00363342	0.00622872	0.0106778	0.0183048	0.0313797	0.0537937	0.0922178	0.158088	0.271008	0.464584	0.79643	1.36531	2.34053	4.01234	4.04105	4.02331	4.00495	3.98591	3.96613	3.94555	3.92411	3.90171	3.87827	3.85367	3.8278	3.80051	3.77161	3.7409	3.70813	3.67299	3.63511	3.59401	3.54911	3.4997	3.44496
268	0	0	0	0	0	0	0	0	0	0	0	0	0	0	0	0	0	0	0	0	0	0	0	0	0	0	0	0	0	0	0	0	0	0	0	0	0	0	0	0	0	0	0	0	0	0	0	0	0
270	0	0	1.36398e-07	2.72795e-07	5.4559e-07	1.09118e-06	2.18236e-06	4.36472e-06	8.72944e-06	1.74589e-05	3.49178e-05	5.9859e-05	0.000102615	0.000175912	0.000301564	0.000516967	0.000886228	0.00151925	0.00260443	0.00446473	0.00765382	0.0131208	0.0224929	0.0385592	0.0661015	0.113317	0.194257	0.333013	0.300686	0.271497	0.245142	0.221345	0.199858	0.180457	0.162939	0.147122	0.132841	0.119945	0.108302	0.162455	0.243686	0.365535	0.54831	0.822477	1.23373	1.85063	2.77598	4.16404	6.24615
275	0	0	0	0	0	0	0	0	0	0	0	0	0	0	0	0	0	0	0	0	0	0	0	0	0	0	0	0	0	0	0	0	0	0	0	0	0	0	0	0	0	0	0	0	0	0	0	0	0
276	0	0	0	0	0	0	0	0	0	0	0	0	0	0	0	0	0	0	0	0	0	0	0	0	0	0	0	0	0	0	0	0	0	0	0	0	0	0	0	0	0	0	0	0	0	0	0	0	0
288	0	0	7.50333e-06	1.68825e-05	3.79856e-05	8.54676e-05	0.000192302	0.00043268	0.000973529	0.00219044	0.00492849	0.00844885	0.0144837	0.0248293	0.0425644	0.0729676	0.125087	0.214435	0.367604	0.630178	1.0803	1.85195	3.17477	5.44247	9.32994	15.9942	27.4186	47.0033	46.7715	46.5319	46.2841	46.0274	45.7611	45.4844	45.1965	44.8961	44.5823	44.2536	43.9084	43.5449	43.1609	42.7538	42.3206	41.8574	41.3597	40.8219	40.2372	39.5975	38.8941
292	0	0	0	0	0	0	0	0	0	0	0	0	0	0	0	0	0	0	0	0	0	0	0	0	0	0	0	0	0	0	0	0	0	0	0	0	0	0	0	0	0	0	0	0	0	0	0	0	0
296	0	0	0	0	0	0	0	0	0	0	0	0	0	0	0	0	0	0	0	0	0	0	0	0	0	0	0	0	0	0	0	0	0	0	0	0	0	0	0	0	0	0	0	0	0	0	0	0	0
300	0	0	0	0	0	0	0	0	0	0	0	0	0	0	0	0	0	0	0	0	1.76972	2.86695	3.10587	3.31823	2.38913	2.65459	3.98188	3.98188	4.16151	4.34113	4.52076	4.70039	4.88002	5.05964	5.23927	5.4189	5.59852	5.77815	5.95778	6.13741	6.72672	7.37179	8.08056	8.8557	9.70783	10.7484	11.8979	13.1721	14.1224
304	0	0	0	0	0	0	0	0	0	0	0	0	0	0	0	0	0	0	0	0	0	0	0	0	0	0	0	0	0	0	0	0	0	0	0	0	0	0	0	0	0	0	0	0	0	0	0	0	0
308	0	0	0	0	0	0	0	0	0	0	0	0	0	0	0	0	0	0	0	0	0	0	0	0	0	0	0	0	0	0	0	0	0	0	0	0	0	0	0	0	0	0	0	0	0	0	0	0	0
312	0	0	0	0	0	0	0	0	0	0	0	0	0	0	0	0	0	0	0	0	0	0	0	0	0	0	0	0	0	0	0	0	0	0	0	0	0	0	0	0	0	0	0	0	0	0	0	0	0
316	0	0	0	0	0	0	0	0	0	0	0	0	0	0	0	0	0	0	0	0	0	0	0	0	0	0	0	0	0	0	0	0	0	0	0	0	0	0	0	0	0	0	0	0	0	0	0	0	0
320	0	0	0	0	0	0	0	0	0	0	0	0	0	0	0	0	0	0	0	0	0	0	0	0	0	0	0	0.000738062	0.00145631	0.00287353	0.00566991	0.0111876	0.0220749	0.0435571	0.0859449	0.169583	0.334613	0.660243	1.30276	1.28564	1.45157	1.63347	1.83818	2.08746	2.33688	2.53936	2.67376	2.81528	3.1215
324	0	0	7.76431e-06	1.74697e-05	3.93068e-05	8.84404e-05	0.000198991	0.000447729	0.00100739	0.00226663	0.00509992	0.00874272	0.0149875	0.0256929	0.0440449	0.0755056	0.129438	0.221894	0.38039	0.652097	1.11788	1.91637	3.2852	5.63177	9.65446	16.5505	28.3723	48.6382	48.9606	49.3014	49.6625	50.0458	50.4538	50.8892	51.3554	51.8562	52.3962	52.9808	53.6169	54.3126	55.0784	55.9275	56.8769	57.9493	59.1758	60.5999	62.286	64.3339	66.9101
328	0	0	0	0	0	0	0	0	0	0	0	0	0	0	0	0	0	0	0	0	0	0	0	0	0	0	0	2.77541e-07	5.81515e-07	1.21841e-06	2.55287e-06	5.34886e-06	1.12071e-05	2.34816e-05	4.91996e-05	0.000103085	0.000215987	0.000452545	0.000948189	0.00199619	0.0042025	0.00884737	0.018626	0.0392127	0.0849609	0.184082	0.398844	0.864163	1.87235
332	0	0	0	0	0	0	0	0	0	0	0	0	0	0	0	0	0	0	0	0	0	0	0	0	0	0	0	0.00124184	0.00194037	0.00303183	0.00473723	0.00740193	0.0115655	0.0180711	0.0282361	0.0441189	0.0689358	0.107712	0.1683	0.262969	0.371495	0.497538	0.666346	0.927059	1.27648	1.70049	2.39813	3.38198	4.90225
334	0	0	0	0	0	0	0	0	0	0	0	0	0	0	0	0	0	0	0	0	0	0	0	0	0	0	0	0	0	0	0	0	0	0	0	0	0	0	0	0	0	0	0	0	0	0	0	0	0
336	0	0	0	0	0	0	0	0	0	0	0	0	0	0	0	0	0	0	0	0	0	0	0	0	0	0	0	0	0	0	0	0	0	0	0	0	0	0	0	0	0	0	0	0	0	0	0	0	0
340	0	0	0	0	0	0	0	0	0	0	0	0	0	0	0	0	0	0	0	0	0	0	0	0	0	0	0	1.21442e-08	2.5126e-08	5.19848e-08	1.07555e-07	2.22527e-07	4.60401e-07	9.52554e-07	1.9708e-06	4.07752e-06	8.43624e-06	1.74543e-05	3.61123e-05	7.47152e-05	0.000284629	0.000664135	0.00154965	0.0034506	0.00743205	0.0160075	0.0344777	0.0742596	0.159944
0	0	0	0	0	0	0	0	0	0	0	0	0	0	0	0	0	0	0	0	0	0	0	0	0	0	0	0	0	0	0	0	0	0	0	0	0	0	0	0	0	0	0	0	0	0	0	0	0	0
348	0	0	0	0	0	0	0	0	0	0	0	0	0	0	0	0	0	0	0	0	1.10382	1.32458	1.76611	2.75954	2.20763	2.75954	2.75954	3.31145	3.66888	4.02631	4.38374	4.74117	5.0986	5.45603	5.81346	6.1709	6.52833	6.88576	7.24319	7.60062	8.58873	9.57684	10.185	10.6611	11.2565	12.0902	13.0452	14.4207	15.714
352	0	0	0	0	0	0	0	0	0	0	0	0	0	0	0	0	0	0	0	0	0	0	0	0	0	0	0	0	0	0	0	0	0	0	0	0	0	0	0	0	0	0	0	0	0	0	0	0	0
356	0	0	0	7.54348	14.3755	27.363	52.0188	98.7577	187.219	354.361	669.579	700.032	730.196	760.073	789.661	818.96	847.972	876.695	905.131	933.278	961.136	988.707	1015.99	1042.98	1069.69	1096.11	1122.24	1365.28	1394.97	1424.64	1454.27	1483.88	1513.46	1543.01	1572.53	1602.02	1631.49	1660.93	2112.92	2635.63	3469.7	4254.82	5817.55	7644.5	10020.9	12578.9	17086.6	17931.1	15858.6
360	0	0	0.0333015	0.060441	0.109578	0.198431	0.358879	0.648188	6.85825	18.4121	38.7489	41.958	45.138	48.2887	51.4103	54.5027	57.5659	60.5999	63.6047	66.5803	69.5268	76.9045	84.2127	91.4514	116.069	140.457	153.341	170.589	172.304	174.018	175.73	177.441	179.15	188.02	196.882	205.735	214.58	223.416	235.818	248.207	260.585	272.951	285.306	363.595	441.81	519.952	598.021	676.017	1491.1
364	0	0	6.18078e-05	0.000129194	0.000529432	0.00149839	0.00393328	0.00842846	0.0164355	0.0303425	0.0910274	0.14223	0.221879	0.34562	0.53763	0.835247	1.29607	1.76914	2.39126	3.76185	5.90523	9.34995	14.7631	15.5012	24.9127	39.8603	74.7381	112.107	115.623	116.788	117.923	119.021	120.079	121.092	122.053	122.957	123.797	124.565	125.252	125.848	130.725	135.278	139.486	143.326	146.769	165.443	182.892	194.104	204.142
368	0	0	0.000100302	0.000167317	0.000279226	0.000761525	0.00342686	0.00856716	0.0224888	0.0481903	0.0578283	0.0910796	0.143125	0.214688	0.322031	0.461091	0.658701	1.72909	3.70519	5.00201	6.66935	5.83568	4.58517	3.33467	3.33467	3.33467	4.16834	3.33467	3.33524	3.3358	3.33637	3.33693	3.3375	3.33806	3.33863	3.33919	3.33976	3.34032	3.51613	3.70119	3.89599	4.10104	4.31688	4.54409	5.19324	5.93513	6.78301	7.75201	8.85944
372	0	0	0	0	0	0	0	0	0	0	0	0	0	0	0	0	0	0	0	0	0	0	0	0	0	0	0	0	0	0	0	0	0	0	0	0	0	0	0	0	0	0	0	0	0	0	0	0	0
376	0	0	0	0	0	0	0	0	0	0	0	0	0	0	0	0	0	0	0	0	0	0	0	0	0	0	0	0	0	0	0	0	0	0	0	0	0	0	0	0	0	0	0	0	0	0	0	0	0
380	0	0	0	0	0	0	0	0	0	0	0	0	0	0	0	0	0	0	0	0	8.6306	16.1824	21.1616	31.1199	19.9168	22.4064	33.0444	33.5622	34.5946	35.7875	37.0216	38.2982	39.6188	40.9849	42.3982	43.8602	45.3726	46.9372	48.5557	50.2301	53.5587	57.1088	60.8955	64.9311	66.4781	70.5493	193	163	144
384	0	0	2.1398e-05	4.49358e-05	9.43652e-05	0.000198167	0.00041615	0.000873916	0.00183522	0.00385397	0.00809333	0.0138743	0.0237845	0.0407734	0.0698973	0.119824	0.205412	0.352136	0.603661	1.03485	1.77402	3.04118	5.21346	8.93736	15.3212	26.2649	45.0255	77.1866	77.6913	78.2215	78.7795	79.3682	79.9908	80.651	81.3531	82.1022	82.9045	83.7671	84.6989	85.7109	86.8165	88.033	89.3826	90.8947	92.6093	94.5824	96.8963	99.6777	103.137
388	0	0	0	0	0	0	0	0	0	0	0	0	0	0	0	0	0	0	0	0	0	0	0	0	0	0	0	4.24087e-09	9.89536e-09	2.30892e-08	5.38747e-08	1.25708e-07	2.93318e-07	6.84408e-07	1.59695e-06	3.72622e-06	8.69452e-06	2.02872e-05	4.73368e-05	9.72324e-05	0.000199721	0.000410237	0.000842649	0.00173085	0.00392325	0.00889271	0.0201568	0.0456887	0.103561
392	0	0	0.0706681	0.153912	0.334847	0.727633	1.57918	3.42268	7.40746	16.0062	34.5278	56.3173	77.086	118.307	157.371	229.956	298.223	434.329	514.352	578.518	522.723	518.766	512.07	555.434	668.002	825.669	1050.8	1483.72	1591.37	1570.74	1549.61	1527.95	1505.72	1472.64	1439.24	1405.45	1371.25	1336.57	1348.17	1357.25	1363.62	1367.03	1367.21	1379.36	1386.65	1438.79	1750.02	1800.55	1876.7
398	0	0	0	0	0	0	0	0	0	0	0	0	0	0	0	0	0	0	0.66707	1.02335	1.56913	1.60324	1.63735	1.82497	2.04669	2.28547	2.60953	2.93359	2.90569	2.87779	2.84989	2.82198	2.79408	2.76618	2.73828	2.71038	2.68247	2.65457	2.62667	2.59877	2.57087	2.54296	2.51506	2.48716	2.45926	3.16492	3.73786	5.07108	6.40429
400	0	0	0	0	0	0	0	0	0	0	0	0	0	0	0	0	0	0	0	0	0	0	0	0	0	0	0	0	0	0	0	0	0	0	0	0	0	0	0	0	0	0	0	0	0	0	0	0	0
404	0	0	0	0	0	0	0	0	0	0	0	0	0	0	0	0	0	0	0	0	0	0	0	0	0	0	0	0.905203	1.07056	1.23592	1.40127	1.56663	1.69742	1.72065	1.74546	1.77204	1.80064	1.83154	1.86511	1.90179	1.94213	1.98683	2.03683	2.09335	2.15809	2.23347	2.32307	2.43254	2.57139
408	0	0	0	1.61837	1.83682	2.07354	2.32656	2.59244	2.86576	3.1386	3.39987	4.28479	5.39931	6.80279	8.5699	10.7945	13.5946	17.1185	21.5525	23.858	26.0799	30.7845	40.3686	29.7717	34.1487	38.3631	47.1294	57.8882	63.4734	66.6962	70.0826	73.6408	77.3795	81.3078	85.4354	89.7724	94.3294	99.1174	104.148	109.434	111.161	111.52	111.88	112.241	112.603	112.907	113.842	114.785	115.736
410	0	0	0	1.68828	1.94859	2.2414	2.56867	2.93176	3.33123	3.76638	4.23492	5.75782	7.82787	10.6415	14.4655	19.6623	26.7245	36.3207	49.3594	54.8976	60.2993	71.5261	94.2635	69.8737	80.5635	90.9863	112.383	138.8	152.443	163.135	174.576	186.82	199.922	213.944	228.948	245.004	262.187	280.574	300.25	321.306	324.737	324.992	325.247	328.391	331.526	332.735	333.94	335.158	716.034
414	0	0	0	0	0	0	0	0	0	0	0	0	0	0	0	0	0	0	0	0	0	0	0	0	0	0	0	0	0	0	0	0	0	0	0	0	0	0	0	0	0	0	0	0	0	0	0	0	0
417	0	0	1.77021e-05	3.09788e-05	5.42128e-05	9.48724e-05	0.000166027	0.000290547	0.000508457	0.0008898	0.00155715	0.00250256	0.00402197	0.00646389	0.0103884	0.0166956	0.0268323	0.0431233	0.0693053	0.108478	0.169497	0.183056	0.196616	0.210176	0.223735	0.237295	0.271194	0.305094	0.322273	0.340177	0.359076	0.379024	0.400081	0.422308	0.44577	0.470535	0.496675	0.524268	0.553394	0.584139	0.616591	0.650846	0.687004	0.725171	0.765458	0.807983	0.852871	0.900253	0.950267
418	0	0	0.00357169	0.00648248	0.0117526	0.0212823	0.0384909	0.0695201	0.125381	0.225772	0.405853	0.43472	0.465632	0.498732	0.534176	0.572127	0.612762	0.656271	0.702855	0.821895	0.939841	1.05669	1.17245	1.28711	1.40068	1.51316	1.88275	2.24885	2.28527	2.32165	2.358	2.39432	2.4306	2.46684	2.50305	2.53923	2.57537	2.61147	2.90857	3.20539	61.6705	66.8878	72.1002	77.3077	82.5103	87.7079	129.193	259.839	287.19
422	0	0	0	0	0	0	0	0	0	0	0	0	0	0	0	0	0	0	0	0	0	0	0	0	0	0	0	0	0	0	0	0	0	0	0	0	0	0	0	0	0	0	0	0	0	0	0	0	0
426	0	0	0	0	0	0	0	0	0	0	0	0	0	0	0	0	0	0	0	0	0	0	0	0	0	0	0	0	0	0	0	0	0	0	0	0	0	0	0	0	0	0	0	0	0	0	0	0	0
428	0	0	0	0	0	0	0	0	0	0	0	0	0	0	0	0	0	0	0	0	0	0	0	0	0	0	0	0	0	0	0	0	0	0	0	0	0	0	0	0	0	0	0	0	0	0	0	0	0
430	0	0	4.04226e-05	9.09509e-05	0.00020464	0.000460439	0.00103599	0.00233097	0.00524469	0.0118005	0.0265512	0.041923	0.0661942	0.104517	0.165027	0.260569	0.411425	0.649618	1.02571	1.61955	2.55718	4.03765	6.37524	10.0662	15.8939	25.0957	39.6248	62.5655	63.1505	63.7651	64.4122	65.0951	65.8176	66.5841	67.4	68.2712	69.2053	70.2109	71.299	72.4827	73.7788	75.2085	76.7992	78.5876	80.6239	82.9789	85.7572	89.1218	93.3457
434	0	0	0	0	0	0	0	0	0	0	0	0	0	0	0	0	0	0	0	0	0	0	0	0	0	0	0	0	0	0	0	0	0	0	0	0	0	0	0	0	0	0	0	0	0	0	0	0	0
438	0	0	0	0	0	0	0	0	0	0	0	0	0	0	0	0	0	0	0	0	0	0	0	0	0	0	0	0	0	0	0	0	0	0	0	0	0	0	0	0	0	0	0	0	0	0	0	0	0
440	0	0	0	0	0	0	0	0	0	0	0	0	0	0	0	0	0	0	0	0	0	0	0	0	0	0	0	0	0	0	0	0	0	0	0	0	0	0	0	0	0	0	0	0	0	0	0	0	0
442	0	0	0	0	0	0	0	0	0	0	0	0	0	0	0	0	0	0	0	0	0	0	0	0	0	0	0	0	0	0	0	0	0	0	0	0	0	0	0	0	0	0	0	0	0	0	0	0	0
446	0	0	0	0	0	0	0	0	0	0	0	0	0	0	0	0	0	0	0	0	0	0	0	0	0	0	0	0	0	0	0	0	0	0	0	0	0	0	0	0	0	0	0	0	0	0	0	0	0
450	0	0	2.57008e-07	5.78268e-07	1.3011e-06	2.92748e-06	6.58684e-06	1.48204e-05	3.33459e-05	7.50282e-05	0.000168813	0.00050644	0.00151932	0.00455796	0.0136739	0.0410217	0.123065	0.369195	1.10758	2.49207	4.98413	10.5913	20.5595	37.8482	67.2858	132.469	241.283	425.793	428.527	429.087	429.692	430.348	431.063	431.845	432.705	433.654	434.71	435.89	437.22	438.732	440.466	442.479	444.844	447.668	451.102	455.375	460.848	468.124	478.304
454	0	0	1.08928e-05	2.04768e-05	3.84996e-05	7.23981e-05	0.000136169	0.000256162	0.000481993	0.000907118	0.00170761	0.00313061	0.00573945	0.0105223	0.0192909	0.0353667	0.064839	0.118872	0.217931	0.384324	0.662628	0.795154	0.92768	1.06021	1.19273	1.32526	1.4379	1.55055	1.57515	1.60525	1.63728	1.67147	1.70807	1.74739	1.78978	1.83567	1.88559	1.94015	2.00016	2.06658	2.14068	2.22409	2.31895	2.42822	2.55602	2.70837	2.89444	3.12913	3.4386
458	0	0	0.00562451	0.0102347	0.0186063	0.033792	0.061306	0.111094	0.201066	0.363411	0.655872	0.798171	0.971324	1.18202	1.43839	1.75033	2.12989	2.59169	3.15356	3.69104	4.22358	5.04549	5.85981	6.66653	7.46565	8.25717	8.91781	9.57198	9.71934	9.90046	10.0933	10.2993	10.5199	10.7571	11.0129	11.29	11.5916	11.9215	12.2844	12.6865	13.1352	13.6406	14.2158	14.8787	15.6545	16.5798	17.7105	19.1375	21.0204
462	0	0	0	0	0	0	0	0	0	0	0	0	0	0	0	0	0	0	0	0	0	0	0	0	0	0	0	0	0	0	0	0	0	0	0	0	0	0	0	0	0	0	0	0	0	0	0	0	0
466	0	0	3.57802e-06	6.70879e-06	1.2579e-05	2.35856e-05	4.4223e-05	8.29181e-05	0.000155471	0.000291509	0.000546579	0.000780827	0.00111547	0.00159352	0.00227646	0.00325209	0.00464585	0.00663692	0.00948132	0.0125101	0.0164606	0.022119	0.0295777	0.0400757	0.0556607	0.0753507	0.109886	0.156981	0.199701	0.252413	0.319194	0.403858	0.511274	0.647674	0.821044	1.04164	1.32267	1.68118	2.13927	2.72568	3.478	4.44567	5.69427	7.31159	9.41676	12.1742	15.8165	20.6842	27.3023
470	0	0	0	0	0	0	0	0	0	0	0	0	0	0	0	0	0	0	0	0	0	0	0	0	0	0	0	0	0	0	0	0	0	0	0	0	0	0	0	0	0	0	0	0	0	0	0	0	0
474	0	0	0	0	0	0	0	0	0	0	0	0	0	0	0	0	0	0	0	0	0	0	0	0	0	0	0	0	0	0	0	0	0	0	0	0	0	0	0	0	0	0	0	0	0	0	0	0	0
478	0	0	4.41421e-06	8.82843e-06	1.76569e-05	3.53137e-05	7.06274e-05	0.000141255	0.00028251	0.000565019	0.00113004	0.00193721	0.00332093	0.00569302	0.00975947	0.0167305	0.0286809	0.0491672	0.0842867	0.133454	0.210717	0.339781	0.545229	0.909635	1.48849	2.40019	4.20034	7.20058	7.18454	7.13501	7.08378	7.03073	6.97569	6.91851	6.85899	6.7969	6.73198	6.66395	6.59244	6.51704	6.43725	6.35247	6.26196	6.16478	6.05976	5.94537	5.81957	5.67955	5.52135
480	0	0	0	0	0	0	0	0	0	0	0	0	0	0	0	0	0	0	0	0	0	0	0	0	0	0	0	0	0	0	0	0	0	0	0	0	0	0	0	0	0	0	0	0	0	0	0	0	0
484	0	0	0	0	0	0	0	0	0	0	0	0	0	0	0	0	0	0	0	0	0	0	0	0	0	0	3.8602	15.4408	16.7366	18.0324	19.3282	20.624	21.9198	23.2156	24.5114	25.8072	27.103	28.3987	29.6945	30.9903	32.2861	33.5819	34.8777	36.1735	37.4693	38.7651	45.7403	52.5575	84
492	0	0	0	0	0	0	0	0	0	0	0	0	0	0	0	0	0	0	0	0	0	0	0	0	0	0	0	0	0	0	0	0	0	0	0	0	0	0	0	0	0	0	0	0	0	0	0	0	0
496	0	0	0	0	0	0	0	0	0	0	0	0	0	0	0	0	0	0	0	0	0	0	0	0	0	0	0	0	0	0	0	0	0	0	0	0	0	0	0	0	0	0	0	0	0	0	0	0	0
498	0	0	0	0	0	0	0	0	0	0	0	0	0	0	0	0	0	0	0	0	0	0	0	0	0	0	0	0	0	0	0	0	0	0	0	0	0	0	0	0	0	0	0	0	0	0	0	0	0
500	0	0	0	0	0	0	0	0	0	0	0	0	0	0	0	0	0	0	0	0	0	0	0	0	0	0	0	0	0	0	0	0	0	0	0	0	0	0	0	0	0	0	0	0	0	0	0	0	0
504	0	0	1.13617e-05	2.55637e-05	5.75184e-05	0.000129416	0.000291187	0.000655171	0.00147413	0.0033168	0.00746281	0.0119609	0.0191703	0.0307249	0.0492441	0.0789255	0.126497	0.202742	0.324942	0.53042	0.860141	0.817134	0.774127	0.864442	0.774127	0.645106	0.967659	0.752623	0.786277	0.81993	0.853583	0.887236	0.920889	0.954542	0.988195	1.02185	1.0555	1.08915	1.12281	1.15646	1.36369	1.57092	1.77814	1.98537	2.1926	2.39983	2.60705	2.81428	3.02151
508	0	0	2.24359e-05	4.71155e-05	9.89425e-05	0.000207779	0.000436337	0.000916307	0.00192424	0.00404091	0.00848592	0.01432	0.024165	0.0407784	0.0688135	0.116123	0.195957	0.330678	0.558019	1.20323	2.35414	3.45274	4.55134	5.64994	6.74854	7.84714	9.80893	11.7707	12.1605	12.5502	12.9399	13.3297	13.7194	14.1092	14.4989	14.8886	15.2784	15.6681	16.0579	16.4476	16.8472	18.7191	20.7991	23.1101	24.5544	26.0891	27.7197	29.4521	31.2929
512	0	0	0	0	0	0	0	0	0	0	0	0	0	0	0	0	0	0	0	0	0	0	0	0	0	0	0	0	0	0	0	0	0	0	0	0	0	0	0	0	0	0	0	0	0	0	0	0	0
516	0	0	0	0	0	0	0	0	0	0	0	0	0	0	0	0	0	0	0	0	0	0	0	0	0	0	0	0	0	0	0	0	0	0	0	0	0	0	0	0	0	0	0	0	0	0	0	0	0
520	0	0	0	0	0	0	0	0	0	0	0	0	0	0	0	0	0	0	0	0	0	0	0	0	0	0	0	0	0	0	0	0	0	0	0	0	0	0	0	0	0	0	0	0	0	0	0	0	0
524	0	0	0.0136916	0.0248498	0.0450523	0.0815832	0.14755	0.266497	0.480634	0.865472	1.55579	1.61558	1.67763	1.74204	1.80888	1.87825	1.95025	2.02496	2.1025	2.16788	2.23259	2.37072	2.50751	2.64296	2.77707	2.90984	3.62056	4.32459	4.42836	4.53204	4.63562	4.7391	4.84248	4.94576	5.04895	5.15203	5.25502	5.35791	5.4607	5.5634	101.204	105.371	109.71	114.018	118.322	124.484	181.676	351.971	427.409
528	0	0	0	0	0	0	0	0	0	0	0	0	0	0	0	0	0	0	0	0	0	0	0	0	0	0	0	0	0	0	0	0	0	0	0	0	0	0	0	0	0	0	0	0	0	0	0	0	0
530	0	0	0	0	0	0	0	0	0	0	0	0	0	0	0	0	0	0	0	0	0	0	0	0	0	0	0	0	0	0	0	0	0	0	0	0	0	0	0	0	0	0	0	0	0	0	0	0	0
533	0	0	0	0	0	0	0	0	0	0	0	0	0	0	0	0	0	0	0	0	0	0	0	0	0	0	0	1.21664e-09	2.63272e-09	5.69704e-09	1.2328e-08	2.6677e-08	5.77273e-08	1.24918e-07	2.70315e-07	5.84943e-07	1.26578e-06	2.73906e-06	5.92715e-06	1.22494e-05	2.53155e-05	5.23187e-05	0.000108125	0.000246462	0.00060423	0.0019717	0.00474298	0.0122118	0.0239657
540	0	0	0	0	0	0	0	0	0	0	0	0	0	0	0	0	0	0	0	0	0	0	0	0	0	0	0	0	0	0	0	0	0	0	0	0	0	0	0	0	0	0	0	0	0	0	0	0	0
548	0	0	0	0	0	0	0	0	0	0	0	0	0	0	0	0	0	0	0	0	0	0	0	0	0	0	0	0	0	0	0	0	0	0	0	0	0	0	0	0	0	0	0	0	0	0	0	0	0
554	0	0	0	0	0	0	0	0	0	0	0	0	0	0	0	0	0	0	0	0	0	0	0	0	0	0	0	0	0	0	0	0	0	0	0	0	0	0	0	0	0	0	0	0	0	0	0	0	0
558	0	0	0	0	0	0	0	0	0	0	0	0	0	0	0	0	0	0	0	0	0	0	0	0	0	0	0	3.38644e-08	7.25665e-08	1.555e-07	3.33214e-07	7.14029e-07	1.53006e-06	3.27871e-06	7.0258e-06	1.50553e-05	3.22613e-05	6.91314e-05	0.000148139	0.00031744	0.000752327	0.00175543	0.004096	0.00869718	0.0184047	0.0419575	0.0959028	0.219206	0.501043
562	0	0	0	0	0	0	0	0	0.269221	0.358961	0.478615	0.546989	0.62513	0.714434	0.816497	0.933139	1.06644	1.21879	1.39291	1.47029	1.54767	1.66375	1.77983	1.97696	2.11817	2.32151	2.70843	3.09535	3.15222	3.17871	3.20659	3.23601	3.26713	3.30013	3.33524	3.37271	3.41286	3.45606	3.50277	3.55353	3.60905	3.67022	3.73819	3.81448	3.90117	4.0012	4.11889	4.26092	4.43846
566	0	0	0	0	0	0	0	0	0	0	0	0	0	0	0	0	0	0	0	0	0	0	0	0	0	0	0	0	0	0	0	0	0.57233	0.721837	0.910829	1.14991	1.45259	1.83617	2.32278	2.94086	3.72711	4.72903	6.00852	7.64676	9.75132	12.4665	15.9898	20.5983	26.6983
570	0	0	0	0	0	0	0	0	0	0	0	0	0	0	0	0	0	0	0	0	0	0	0	0	0	0	0	0	0	0	0	0	0	0	0	0	0	0	0	0	0	0	0	0	0	0	0	0	0
574	0	0	0	0	0	0	0	0	0	0	0	0	0	0	0	0	0	0	0	0	0	0	0	0	0	0	0	0	0	0	0	0	0	0	0	0	0	0	0	0	0	0	0	0	0	0	0	0	0
578	0	0	0	0	0	0	0	0	0	0	0	0	0	0	0	0	0	0	0	0	0	0	0	0	0	0	0	0	0	0	0	0	0	0	0	0	0	0	0	0	0	0	0	0	0	0	0	0	0
580	0	0	0	0	0	0	0	0	0	0	0	0	0	0	0	0	0	0	0	0	0	0	0	0	0	0	0	0	0	0	0	0	0	0	0	0	0	0	0	0	0	0	0	0	0	0	0	0	0
583	0	0	0	0	0	0	0	0	0	0	0	0	0	0	0	0	0	0	0	0	0	0	0	0	0	0	0	0	0	0	0	0	0	0	0	0	0	0	0	0	0	0	0	0	0	0	0	0	0
584	0	0	0	0	0	0	0	0	0	0	0	0	0	0	0	0	0	0	0	0	0	0	0	0	0	0	0	0	0	0	0	0	0	0	0	0	0	0	0	0	0	0	0	0	0	0	0	0	0
585	0	0	0	0	0	0	0	0	0	0	1.73179e-05	3.24711e-05	6.08834e-05	0.000114156	0.000214043	0.000401331	0.000752496	0.00141093	0.00264549	0.0049603	0.00930056	0.0174386	0.0326973	0.0613074	0.114951	0.215534	0.404126	0.757736	0.797841	0.840068	0.88453	0.931345	0.980637	1.03254	1.08719	1.14473	1.20531	1.2691	1.33627	1.4109	1.48969	1.57289	1.66073	1.75348	1.81445	1.87754	1.94282	2.01037	2.08026
586	0	0	0.0471571	0.117893	0.294732	0.736829	1.84207	4.60518	11.513	28.7824	71.9559	77.2468	82.5377	88.8868	95.2358	101.585	107.934	119.574	131.214	147.086	162.959	169.308	175.657	175.657	198.937	211.635	275.126	338.616	342.087	349.068	356.192	363.461	370.879	378.448	386.171	394.052	402.094	410.3	418.673	427.218	435.936	444.833	453.911	463.175	472.627	482.273	492.115	502.158	512.406
591	0	0	0	0	0	0	0	0	0	0	0	0	0	0	0	0	0	0	0	0	0	0	0	0	0	0	0	0.00213247	0.0044894	0.00945137	0.0198976	0.0418897	0.0881889	0.185661	0.390865	0.822874	1.73237	3.64709	7.67807	8.5838	9.59636	10.7284	11.9939	13.8191	15.6453	17.1813	20.0504	23.3987	30.0198
598	0	0	1.94218e-05	4.36989e-05	9.83226e-05	0.000221226	0.000497758	0.00111996	0.0025199	0.00566978	0.012757	0.0200467	0.031502	0.0495031	0.0777906	0.122242	0.192095	0.301864	0.474357	0.745419	1.17137	1.84073	2.89257	4.54547	7.14288	11.2245	17.6386	27.7177	27.4492	27.1688	26.8757	26.5689	26.2476	25.9106	25.5565	25.184	24.7913	24.3766	23.9376	23.4716	22.9755	22.4454	21.8767	21.2635	20.5708	19.8185	18.9937	18.0785	17.0466
600	0	0	0	0	0	0	0	0	0	0	0	0	0	0	0	0	0	0	0	0	0	0	0	0	0	0	0	2.65668e-08	5.57902e-08	1.16894e-07	2.44414e-07	5.10082e-07	1.06267e-06	2.21036e-06	4.59074e-06	9.52153e-06	1.97232e-05	4.08066e-05	9.24949e-05	0.000206753	0.000457033	0.00100112	0.00217635	0.00452681	0.00940183	0.0195001	0.0403931	0.0835718	0.215796
604	0	0	0	0	0	0	0	0	0	0	0	0	0	0	0	0	0	0	0	0	0	0	0	0	0	0	0	0.000643042	0.00127218	0.00251685	0.00497929	0.00985091	0.0194888	0.0385563	0.0762789	0.150909	0.298554	0.590653	1.16854	1.44488	2.10097	3.00138	4.28768	6.16488	8.71269	12.8827	21.2239	31.6237	56
608	0	0	0.0657219	0.152682	0.354316	0.821269	1.90123	4.39539	10.1468	23.3872	53.8128	56.8246	60.0038	63.3597	66.902	70.641	74.5875	78.753	83.1495	93.1261	103.01	109.383	115.695	121.944	128.132	134.258	43.433	49.8997	49.3373	48.7813	48.2315	47.6878	47.1504	46.6189	46.0934	45.5739	45.0602	44.5523	44.05	43.5535	50.6404	57.8478	66.0808	75.9738	85.8576	101.513	133.729	159.33	764.797
612	0	0	0	0	0	0	0	0	0	0	0	0	0	0	0	0	0	0	0	0	0	0	0	0	0	0	0	0	0	0	0	0	0	0	0	0	0	0	0	0	0	0	0	0	0	0	0	0	0
616	0	0	0	0	0	0	0	0	0	0	0	0	0	0	0	0	0	0	0	0	0	0	0	0	0	0	0	0	0	0	0	0	0	0	0	0	0	0	0	0	0	0	0	0	0	0	0	0	0
620	0	0	4.89518e-16	1.46855e-15	4.40566e-15	1.3217e-14	3.9651e-14	1.18953e-13	3.56859e-13	1.07058e-12	3.21173e-12	7.13718e-12	1.42744e-11	2.85487e-11	5.70974e-11	1.02775e-10	1.82712e-10	3.65423e-10	7.30847e-10	1.82712e-09	4.38508e-09	1.09627e-08	2.63105e-08	7.30847e-08	1.05242e-07	3.07631e-07	9.81361e-07	2.0207e-06	5.25833e-06	1.08638e-05	2.21931e-05	4.53364e-05	9.26128e-05	0.000189447	0.000387501	0.000792551	0.00162089	0.00331475	0.00676336	0.0138037	0.029096	0.0614504	0.12618	0.27131	0.587896	1.27586	2.80818	6.01873	13.094
624	0	0	1.71413e-06	3.8568e-06	8.67779e-06	1.9525e-05	4.39313e-05	9.88455e-05	0.000222402	0.000500405	0.00112591	0.00193013	0.0033088	0.00567223	0.00972383	0.0166694	0.0285761	0.0489877	0.0839789	0.143964	0.246795	0.423077	0.725275	1.24333	2.13142	3.65387	6.26377	10.7379	10.9055	11.0829	11.271	11.4711	11.6845	11.9128	12.158	12.4224	12.7086	13.02	13.3607	13.7358	14.1518	14.6171	15.1427	15.7436	16.4404	17.2632	18.2573	19.4951	21.1022
626	0	0	5.75069e-07	1.07825e-06	2.02173e-06	3.79074e-06	7.10764e-06	1.33268e-05	2.49878e-05	4.68521e-05	8.78477e-05	0.000164714	0.00030884	0.000579074	0.00108576	0.00203581	0.00381714	0.00715714	0.0134196	0.0251618	0.0471784	0.0884595	0.165862	0.31099	0.583107	1.09333	2.04999	3.84372	3.88163	3.91903	3.95585	3.99203	4.02747	4.0621	4.0958	4.12849	4.16005	4.19035	4.21925	4.53197	4.86573	5.22159	5.60062	6.00384	6.17493	6.34673	6.51863	6.6899	6.85968
630	0	0	0	0	0	0	0	0	0	0	0	0	0	0	0	0	0	0	0	0	0	0	0	0	0	0	0.00131596	0.00197395	0.00257211	0.00335154	0.00436716	0.00569054	0.00741495	0.0096619	0.0125897	0.0164048	0.021376	0.0278535	0.036294	0.0472922	0.0570993	0.0669064	0.0840619	0.102524	0.122948	0.143782	0.164318	0.18715	0.230632
634	0	0	0	0	0	0	0	0	0	0	0	0	0	0	0	0	0	0	0	0	0	0	0	0	0	0	0	0	0	0	0	0	0	0	0	0	0	0	0	0	0	0	0	0	0	0	0	0	0
638	0	0	0	0	0	0	0	0	0	0	0	0	0	0	0	0	0	0	0	0	0	0	0	0	0	0	0	0	0	0	0	0	0	0	0	0	0	0	0	0	0	0	0	0	0	0	0	0	0
642	0	0	0	0	0	0	0	0	0	0	0	0	0	0	0	0	0	0	0	0	0.460694	0.518281	0.575868	0.863802	0.719835	1.15174	1.15174	1.43967	1.7225	1.84554	1.97736	2.1186	2.26993	2.43207	2.60579	2.79192	2.99134	3.20501	3.43394	3.67922	4.08089	4.33595	4.60694	4.94642	5.28589	5.62968	5.97348	6.33455	6.83325
643	0	0	7.88164e-05	0.000137929	0.000241377	0.000422413	0.000739234	0.00129369	0.00226405	0.00396236	0.00693495	0.0117053	0.0195168	0.0322267	0.0528073	0.0794509	0.119896	0.196812	0.323909	0.520568	0.832908	1.24936	1.87404	1.93949	1.93949	2.49872	3.12341	3.53986	4.00989	4.47993	4.94997	5.42	5.89004	6.36007	6.83011	7.30015	7.77018	8.24022	8.71025	9.29509	9.93911	11.7735	12.7631	14.662	15.9022	18.3085	21.0451	23.6398	29.4184
646	0	0	0	0	0	0	0	0	0	0	0	0	0	0	0	0	0	0	0	0	0	0	0	0	0	0	0	0	0	0	0	0	0	0	0	0	0	0	0	0	0	0	0	0	0	0	0	0	0
654	0	0	0	0	0	0	0	0	0	0	0	0	0	0	0	0	0	0	0	0	0	0	0	0	0	0	0	0	0	0	0	0	0	0	0	0	0	0	0	0	0	0	0	0	0	0	0	0	0
659	0	0	0	0	0	0	0	0	0	0	0	0	0	0	0	0	0	0	0	0	0	0	0	0	0	0	0	0	0	0	0	0	0	0	0	0	0	0	0	0	0	0	0	0	0	0	0	0	0
660	0	0	0	0	0	0	0	0	0	0	0	0	0	0	0	0	0	0	0	0	0	0	0	0	0	0	0	0	0	0	0	0	0	0	0	0	0	0	0	0	0	0	0	0	0	0	0	0	0
662	0	0	0	0	0	0	0	0	0	0	0	0	0	0	0	0	0	0	0	0	0	0	0	0	0	0	0	0	0	0	0	0	0	0	0	0	0	0	0	0	0	0	0	0	0	0	0	0	0
666	0	0	0	0	0	0	0	0	0	0	0	0	0	0	0	0	0	0	0	0	0	0	0	0	0	0	0	0	0	0	0	0	0	0	0	0	0	0	0	0	0	0	0	0	0	0	0	0	0
670	0	0	0	0	0	0	0	0	0	0	0	0	0	0	0	0	0	0	0	0	0	0	0	0	0	0	0	0	0	0	0	0	0	0	0	0	0	0	0	0	0	0	0	0	0	0	0	0	0
674	0	0	0	0	0	0	0	0	0	0	0	0	0	0	0	0	0	0	0	0	0	0	0	0	0	0	0	0	0	0	0	0	0	0	0	0	0	0	0	0	0	0	0	0	0	0	0	0	0
678	0	0	0	0	0	0	0	0	0	0	0	0	0	0	0	0	0	0	0	0	0	0	0	0	0	0	0	0	0	0	0	0	0	0	0	0	0	0	0	0	0	0	0	0	0	0	0	0	0
682	0	0	0	0	0	0	0	0	0	0	0	0	0	0	0	0	0	0	0	0	0	0	0	0	0	0	0	0	0	0	0	0	0	0	0	0	0	0	0	0	0	0	0	0	0	0	0	0	0
686	0	0	0	0	0	0	0	0	0.0262758	0.0350344	0.0467125	0.0583907	0.0729883	0.0912354	0.114044	0.142555	0.178194	0.222743	0.278428	0.348035	0.435044	0.543805	0.679757	1.27454	2.38977	4.48082	8.40153	15.7529	15.893	16.0425	16.2025	16.3741	16.5587	16.758	16.9739	17.2088	17.4655	17.7474	18.0587	18.4047	18.7921	19.2295	19.7283	20.3041	20.9781	21.7815	22.7608	24.6996	30.6393
690	0	0	0	0	0	0	0	0	0	0	0	0	0	0	0	0	0	0	0	0	0	0	0	0	0	0	0	0	0	0	0	0	0	0	0	0	0	0	0	0	0	0	0	0	0	0	0	0	0
694	0	0	6.44956e-07	1.28991e-06	2.57982e-06	5.15965e-06	1.03193e-05	2.06386e-05	4.12772e-05	8.25544e-05	0.000165109	0.000275181	0.000458635	0.000764392	0.00127399	0.00212331	0.00353885	0.00589809	0.00983015	0.0163836	0.027306	0.0455099	0.0758499	0.126416	0.210694	0.351157	0.585262	0.975436	1.08406	1.20478	1.33894	1.48804	1.65375	1.83791	2.04257	2.27003	2.52282	2.80375	3.11597	3.46296	3.84858	4.27715	4.75343	5.28276	8.21944	12.7886	19.8978	30.9589	48.169
702	0	0	0	0	0	0	0	0	0	0	0	0	0	0	0	0	0	0	0	0	0	0	0	0	0	0	0	0	0	0	0	0	0	0	0	0	0	0	0	0	0	0	0	0	0	0	0	0	0
703	0	0	0	0	0	0	0	0	0	0	0	0	0	0	0	0	0	0	0	0	0	0	0	0	0	0	0	0	0	0	0	0	0	0	0	0	0	0	0	0	0	0	0	0	0	0	0	0	0
704	0	0	0.00989283	0.025593	0.0661595	0.17089	0.441039	1.13724	2.9297	7.53974	19.3831	20.7681	22.2517	23.8407	25.5426	27.3655	29.3178	31.4087	33.648	35.3502	37.0348	47.9166	58.6928	69.3635	79.9286	90.3882	112.436	134.263	147.434	160.592	173.737	186.869	199.988	213.094	226.187	239.267	252.334	265.388	278.429	291.457	326.683	361.874	397.031	432.152	467.238	564.673	662.011	759.252	856.397
705	0	0	0	0	0	0	0	0	0	0	0	0	0	0	0	0	0	0	0	0	0	0	0	0	0	0	0	0	0	0	0	0	0	0	0	0	0	0	0	0	0	0	0	0	0	0	0	0	0
706	0	0	0	0	0	0	0	0	0	0	0	0	0	0	0	0	0	0	0	0	0	0	0	0	0	0	0	0	0	0	0	0	0	0	0	0	0	0	0	0	0	0	0	0	0	0	0	0	0
710	0	0	0	0	0	0	0	0	0	0	0	0	0	0	0	0	0	0	0	0	0	0	0	0	0	0	0	0	0	0	0	0	0	0	0	0	0	0	0	0	0	0	0	0	0	0	0	0	0
716	0	0	1.39811e-06	3.14576e-06	7.07795e-06	1.59254e-05	3.58321e-05	8.06223e-05	0.0001814	0.00040815	0.000918338	0.00157429	0.00269879	0.0046265	0.00793114	0.0135962	0.0233078	0.0399563	0.0684965	0.120794	0.208266	0.312399	0.468599	0.702899	1.05435	3.16304	5.14786	8.32672	8.3591	8.40369	8.45065	8.50023	8.55271	8.60843	8.66778	8.73125	8.7994	8.87291	8.95265	9.03967	9.13533	9.24136	9.36009	9.49465	9.64946	9.83095	10.049	10.3196	10.6716
724	0	0	0	0	0	0	0	0	0	0	0	0	0	0	0	0	0	0	0	0	8.12999	9.14623	11.1787	15.2437	11.1787	13.2112	17.2762	16.26	18.3487	18.8584	19.3822	19.9206	20.474	21.0427	21.6272	22.228	22.8454	23.48	24.1322	24.8026	26.5058	26.4633	28.894	31.8411	33.5496	35.3419	36.9777	37.7922	38
732	0	0	0	0	0	0	0	0	0	0	0	0	0	0	0	0	0	0	0	0	0	0	0	0	0	0	0	0	0	0	0	0	0	0	0	0	0	0	0	0	0	0	0	0	0	0	0	0	0
736	0	0	0	0	0	0	0	0	0	0	0	0	0	0	0	0	0	0	0	0	0	0	0	0	0	0	0	0	0	0	0	0	0	0	0	0	0	0	0	0	0	0	0	0	0	0	0	0	0
740	0	0	0	0	0	0	0	0	0	0	0	0	0	0	0	0	0	0	0	0	0	0	0	0	0	0	0	3.65409e-07	7.97257e-07	1.73947e-06	3.79521e-06	8.28045e-06	1.80664e-05	3.94177e-05	8.60022e-05	0.000187641	0.000409399	0.000893234	0.00194887	0.00417616	0.00894891	0.0191762	0.0410919	0.0880542	0.195676	0.434835	0.966301	2.14734	4.77186
744	0	0	0	0	0	0	0	0	0	0	0	0	0	0	0	0	0	0	0	0	0	0	0	0	0	0	0	0	0	0	0	0	0	0	0	0	0	0	0	0	0	0	0	0	0	0	0	0	0
748	0	0	1.66331e-07	3.74245e-07	8.42051e-07	1.89461e-06	4.26288e-06	9.59148e-06	2.15808e-05	4.85569e-05	0.000109253	0.000164428	0.000247466	0.000372441	0.00056053	0.000843607	0.00126964	0.00191083	0.00287583	0.00474513	0.00776475	0.0139766	0.024459	0.0419297	0.0707563	0.117927	0.206373	0.442227	0.508361	0.544321	0.582539	0.623106	0.666103	0.711598	0.759646	0.810278	0.863497	0.919265	0.977494	1.03803	1.10063	1.16493	1.23042	1.29639	1.36181	1.4253	1.4849	1.53782	1.57999
752	0	0	0	0	0	0	0	0	0	0	0	0	0	0	0	0	0	0	0	0	0	0	0	0	0	0	0	0	0	0	0	0	0	0	0	0	0	0	0	0	0	0	0	0	0	0	0	0	0
756	0	0	0	0	0	0	0	0	0	0	0	0	0	0	0	0	0	0	0	0	0	0	0	0	0	0	0	0	0	0	0	0	0	0	0	0	0	0	0	0	0	0	0	0	0	0	0	0	0
760	0	0	0	0	0	0	0	0	0	0	0	0	0	0	0	0	0	0	0	0	0	0	0	0	0	0	0	0	0	0	0	0	0	0	0	0	0	0	0	0	0	0	0	0	0	0	0	0	0
762	0	0	2.78295e-05	4.87017e-05	8.52279e-05	0.000149149	0.00026101	0.000456768	0.000799344	0.00139885	0.00244799	0.00393427	0.00632294	0.0101619	0.0163316	0.0262472	0.0421829	0.067794	0.108955	0.171604	0.269663	0.42288	0.689479	1.11696	1.79954	2.88547	4.88668	8.16774	8.64849	9.00579	9.37244	9.74789	10.1314	10.5221	10.9188	11.32	11.7239	12.1283	12.5304	12.9266	13.3129	13.6837	14.0325	14.3507	14.6275	14.8485	14.9949	15.0401	14.9465
764	0	0	0.0181512	0.0395325	0.086006	0.186894	0.991505	3.12576	8.35168	20.5329	73.821	81.1098	88.3775	95.6231	102.846	110.044	117.218	124.365	131.486	138.579	145.643	174.489	203.233	231.869	260.396	288.809	324.313	359.668	362.452	369.093	375.856	382.742	389.755	396.896	404.168	411.572	419.113	426.791	455.154	483.507	511.848	540.178	568.496	653.641	738.752	823.829	908.872	993.881	1008.61
768	0	0	3.58264e-05	7.16527e-05	0.000143305	0.000286611	0.000573222	0.00114644	0.00229289	0.00458577	0.00917155	0.0157227	0.0269531	0.0462053	0.0792092	0.135787	0.232778	0.399048	0.684082	1.17271	2.01036	2.29756	2.62578	3.00089	3.42959	3.91953	4.47947	5.11939	5.13651	5.15369	5.17093	5.18822	5.20557	5.22298	5.24045	5.25798	5.27556	5.29321	5.31091	5.35554	5.40054	5.44593	5.49169	5.53784	5.65086	5.76618	5.88386	6.00394	6.12647
772	0	0	0	0	0	0	0	0	0	0	0	0	0	0	0	0	0	0	0	0	0	0	0	0	0	0	0	0	0	0	0	0	0	0	0	0	0	0	0	0	0	0	0	0	0	0	0	0	0
776	0	0	0	0	0	0	0	0	0	0	0	0	0	0	0	0	0	0	0	0	0	0	0	0	0	0	0	0	0	0	0	0	0	0	0	0	0	0	0	0	0	0	0	0	0	0	0	0	0
780	0	0	0	0	0	0	0	0	0	0	0	0	0	0	0	0	0	0	0	0	0	0	0	0	0	0	0.00124524	0.00249047	0.00373571	0.00560356	0.00840535	0.012608	0.018912	0.028368	0.0425521	0.0638281	0.0957421	0.143613	0.21542	0.32313	0.340417	0.382969	0.43084	0.549321	0.667801	0.92372	1.15465	1.44331	1.7826
784	0	0	0	0	0	0	0	0	0	0	0	0	0	0	0	0	0	0	0	0	0	0	0	0	0	0	0	0	0	0	0	0	0	0	0	0	0	0	0	0	0	0	0	0	0	0	0	0	0
788	0	0	0	0	0	0	0	0	0	0	0	0	0	0	0	0	0	0	0	0	0	0	0	0	0	0	0	0	0	0	0	0	0	0	0	0	0	0	0	0	0	0	0	0	0	0	0	0	0
792	0	0	3.72414e-05	8.37932e-05	0.000188535	0.000895539	0.00226242	0.00477228	0.0143168	0.0322129	0.0644258	0.104692	0.169118	0.235557	0.326156	0.448464	0.611542	1.00904	1.65116	2.73474	4.4891	4.92253	8.7073	15.0462	12.1206	13.061	16.718	17.7629	17.9704	18.2309	18.4951	18.7631	19.0351	19.3109	19.5908	19.8747	20.1628	20.455	20.7514	21.0522	21.8477	22.601	23.3804	24.1866	25.0206	25.5692	26.091	26.6235	27.1668
795	0	0	0.000188671	0.000330174	0.000577805	0.00101116	0.00176953	0.00309667	0.00541918	0.00948356	0.0165962	0.0266725	0.0428666	0.0688927	0.11072	0.177943	0.285981	0.459612	0.738662	1.14262	1.76586	1.89051	2.01516	2.13981	2.28523	2.49298	2.90848	3.2201	3.43642	3.62733	3.82885	4.04156	4.26609	4.5031	4.75327	5.01734	5.29608	5.59031	5.90088	6.22871	6.57475	6.94001	7.32557	7.73254	8.16213	8.61558	9.09422	9.59946	10.1328
796	0	0	0	0	0	0	0	0	0	0	0	0	0	0	0	0	0	0	0	0	0	0	0	0	0	0	0	0	0	0	0	0	0	0	0	0	0	0	0	0	0	0	0	0	0	0	0	0	0
798	0	0	0	0	0	0	0	0	0	0	0	0	0	0	0	0	0	0	0	0	0	0	0	0	0	0	0	0	0	0	0	0	0	0	0	0	0	0	0	0	0	0	0	0	0	0	0	0	0
800	0	0	0	0	0	0	0	0	0	0	0	0	0	0	0	0	0	0	0	0	0	0	0	0	0	0	0	0	0	0	0	0	0	0	0	0	0	0	0	0	0	0	0	0	0	0	0	0	0
804	0	0	0	0	0	0	0	0	0	0	0	0	0	0	0	0	0	0	0	0	0	0	0	0	0	0	0	0	0	0	0	0	0	0	0	0	0	0	0	0	0	0	0	0	0	0	0	0	0
807	0	0	0	0	0	0	0	0	0	0	0	0	0	0	0	0	0	0	0	0	0	0	0	0	0	0	0	0	0	0	0	0	0	0	0	0	0	0	0	0	0	0	0	0	0	0	0	0	0
818	0	0	0	0	0	0	0	0	5.42002	10.84	32.5201	34.9592	37.3982	34.9592	32.5201	28.4551	24.3901	27.6421	30.8941	35.7722	40.6502	35.3657	32.5201	38.2112	32.9266	32.5201	40.6502	36.5852	35.7722	34.9592	34.1462	33.3332	32.5201	31.7071	30.8941	30.0811	29.2681	28.4551	31.7071	34.9592	38.2112	41.4632	44.7152	39.8235	45.5126	52.0144	72.3	50	121
826	0	0	0	0	0	0	0	0	0	0	0	0	0	0	0	0	0	0	0	0	0	0	0	0	0	0	0	0	0	0	0	0	0	0	0	0	0	0	0	0	0	0	0	0	0	0	0	0	0
834	0	0	7.35808e-05	0.000145007	0.000287948	0.000576447	0.00116388	0.00237082	0.00487334	0.0101096	0.0211654	0.0377543	0.0673464	0.120136	0.214309	0.382314	0.682042	1.21678	2.17085	3.79898	6.51254	10.3794	14.2462	18.113	21.9798	14.2462	17.2989	20.3517	20.6258	20.864	21.1156	21.3819	21.6645	21.9655	22.2869	22.6314	23.0021	23.4029	23.8383	24.3142	24.8377	25.4181	26.0674	26.8018	27.6433	28.6237	29.7898	31.2153	33.025
840	0	0	0	0	0	0	0	0	0	0	0	0	0	0	0	0	0	0	0	0	0	0	0	0	0	0	0	3.05107e-06	9.03594e-06	2.39395e-05	5.96141e-05	0.000142698	0.000332337	0.000758556	0.00170487	0.00378527	0.0083216	0.021277	0.0551032	0.142869	0.373089	0.97137	2.56564	6.87784	16.8071	43.6379	108.924	146	270
850	0	0	0	0	0	0	0	0	0	0	0	0	0	0	0	0	0	0	0	0	0	0	0	0	0	0	0	0	0	0	0	0	0	0	0	0	0	0	0	0	0	0	0	0	0	0	0	0	0
854	0	0	6.08203e-05	0.000136846	0.000307903	0.000692781	0.00155876	0.0035072	0.00789121	0.0177552	0.0399492	0.0679137	0.115453	0.196271	0.33366	0.567222	0.964277	1.63927	2.78676	4.73749	8.05374	9.12757	10.3446	11.7239	13.287	15.0586	17.0665	19.342	19.4067	19.5862	19.7754	19.9751	20.1866	20.4111	20.6502	20.9058	21.1798	21.4751	21.7948	22.1427	22.5239	22.9446	23.4128	23.9395	24.5393	25.2333	26.052	27.0436	28.2883
858	0	0	0	0	0	0	0	0	0	0	0	0	0	0	0	0	0	0	0	0	0	0	0	0	0	0	0	5.99711e-09	1.26255e-08	2.658e-08	5.59579e-08	1.17806e-07	2.48013e-07	5.22132e-07	1.09923e-06	2.31416e-06	4.87191e-06	1.02567e-05	2.1593e-05	4.54589e-05	0.000122739	0.000327304	0.000872811	0.0031408	0.00907194	0.0245445	0.0725755	0.193605	0.441245
860	0	0	0.000343111	0.000600445	0.00105078	0.00183886	0.00321801	0.00563152	0.00985516	0.0172465	0.0301814	0.0485058	0.0779558	0.125286	0.201353	0.323603	0.520076	0.835836	1.34331	2.09993	3.27735	3.53225	3.78716	4.04206	4.29697	4.58829	5.24376	5.89922	6.28113	6.63008	6.99842	7.38722	7.79763	8.23083	8.6881	9.17077	9.68025	10.218	10.7857	11.3849	12.0174	12.6851	13.3898	14.1337	14.9189	15.7477	16.6226	17.546	18.5208
862	0	0	0	0	0	0	0	0	0	0	0	0	0	0	0	0	0	0	0	0	0	0	0	0	0	0	0	1.14972e-07	2.32854e-07	4.71603e-07	9.55145e-07	1.93447e-06	3.91792e-06	7.93502e-06	1.60709e-05	3.25487e-05	6.59215e-05	0.000133512	0.000270404	0.000663718	0.00162913	0.00399876	0.00981515	0.0240917	0.0542064	0.121964	0.27707	0.566909	1.14811
876	0	0	0	0	0	0	0	0	0	0	0	0	0	0	0	0	0	0	0	0	0	0	0	0	0	0	0	0	0	0	0	0	0	0	0	0	0	0	0	0	0	0	0	0	0	0	0	0	0
882	0	0	0	0	0	0	0	0	0	0	0	0	0	0	0	0	0	0	0	0	0	0	0	0	0	0	0	0	0	0	0	0	0	0	0	0	0	0	0	0	0	0	0	0	0	0	0	0	0
887	0	0	0	0	0	0	0	0	0	0	0	0	0	0	0	0	0	0	0	0	0	0	0	0	0	0	0	0	0	0	0	0	0	0	0	0	0	0	0	0	0	0	0	0	0	0	0	0	0
891	0	0	0	0	0	0	0	0	0	0	0	0	0	0	0	0	0	0	0	0	0	0	0	0	0	0	0	0	0	0	0	0	0	0	0	0	0	0	0	0	0	0	0	0	0	0	0	0	0
894	0	0	0	0	0	0	0	0	0	0	0	0	0	0	0	0	0	0	0	0	0	0	0	0	0	0	0	0	0	0	0	0	0	0	0	0	0	0	0	0	0	0	0	0	0	0	0	0	0
[truncated: 29 more columns]

## Sheet: lower2grid
ISO1	y-10000	y-9000	y-8000	y-7000	y-6000	y-5000	y-4000	y-3000	y-2000	y-1000	y0	y100	y200	y300	y400	y500	y600	y700	y800	y900	y1000	y1100	y1200	y1300	y1400	y1500	y1600	y1700	y1710	y1720	y1730	y1740	y1750	y1760	y1770	y1780	y1790	y1800	y1810	y1820	y1830	y1840	y1850	y1860	y1870	y1880	y1890	y1900	y1910
4	0	0	1.50219e-06	4.67988e-06	1.29597e-05	3.36453e-05	0.000247293	0.000759543	0.00186227	0.00408791	0.0136264	0.0256997	0.0473416	0.0777754	0.126808	0.205429	0.330968	0.51477	0.796549	1.24028	1.92397	3.21094	5.32991	5.8694	9.87171	16.4967	32.2476	50.3457	51.963	53.5166	55.101	56.7164	58.3627	60.0397	61.7474	63.4855	65.2537	67.0516	68.8788	70.7347	73.3606	77.7081	82.2876	87.1091	92.183	98.9709	107.419	116.547	125.615
8	0	0	0	0	0	0	0	0	0	0	0	0	0	0	0	0	0	0	0	0	0.200476	0.211312	0.222149	0.232985	0.243822	0.254659	0.265495	0.414497	0.436008	0.45794	0.480292	0.503065	0.526258	0.549872	0.573907	0.598362	0.623238	0.648535	0.674252	0.70039	0.720583	0.772939	0.828995	0.924541	1.02198	1.13846	1.2572	1.40008	1.53603
12	0	0	0	0	0	0	0	0	0	0	0	0	0	0	0	0	0	0	0	0	0	0	0	0	0	0	0	0	0	0	0	0	0	0	0	0	0	0	0	0	0	0	0	0	0	0	0	0	0
16	0	0	0	0	0	0	0	0	0	0	0	0	0	0	0	0	0	0	0	0	0	0	0	0	0	0	0	0	0	0	0	0	0	0	0	0	0	0	0	0	0	0	0	0	0	0	0	0	0
20	0	0	0	0	0	0	0	0	0	0	0	0	0	0	0	0	0	0	0	0	0	0	0	0	0	0	0	0	0	0	0	0	0	0	0	0	0	0	0	0	0	0	0	0	0	0	0	0	0
24	0	0	1.78076e-07	6.67786e-07	2.22595e-06	6.9561e-06	2.08683e-05	6.08659e-05	0.000173903	0.000489101	0.00135861	0.0030369	0.00671315	0.014705	0.0319674	0.0690496	0.148329	0.317117	0.675151	1.39634	2.72516	3.35121	4.02636	4.75061	5.80016	6.92337	7.66911	8.45167	4.06766	4.17864	4.29453	4.41582	4.54311	4.67707	4.8185	4.96835	5.12775	5.29807	5.48098	5.67856	5.89344	6.12895	6.3895	6.68097	7.01147	7.39263	7.84181	8.38649	9.01692
28	0	0	0	0	0	0	0	0	0	0	0	0	0	0	0	0	0	0	0	0	0	0	0	0	0	0	0	0	0	0	0	0	0	0	0	0	0	0	0	0	0	0	0	0	0	0	0	0	0
31	0	0	0	0	0	0	0	0	0	0	0.000112973	0.000202925	0.000360459	0.000634481	0.00110837	0.00192382	0.00332087	0.00570519	0.00976061	0.0164116	0.0274248	0.0433609	0.0607793	0.0796802	0.066709	0.0870924	0.108958	0.132306	0.0873493	0.0958735	0.105212	0.115441	0.126644	0.138912	0.152346	0.167055	0.183156	0.200781	0.220072	0.241184	0.264286	0.289563	0.317218	0.347471	0.380564	0.416759	0.456343	0.499631	0.543546
32	0	0	0	0	0	0	0	0	0	0	0	0	0	0	0	0	0	0	0	0	0	0	0	0	0	0	0	0.000122159	0.000247576	0.000501668	0.00101637	0.00205879	0.00416971	0.00844365	0.0170958	0.0346086	0.0700511	0.14177	0.39876	0.515452	0.666204	0.860933	1.11244	1.43725	1.93739	2.81147	3.7039	5.27017	7.632
36	0	0	0	0	0	0	0	0	0	0	0	0	0	0	0	0	0	0	0	0	0	0	0	0	0	0	0	0	0	0	0	0	0	0	0	0	0	0.178056	0.165006	0.158656	0.174366	0.226678	0.425954	0.911431	1.37048	1.7983	2.51047	3.03509	3.60497
40	0	0	0	0	0	0	0	0	0	0	0	0	0	0	0	0	0	0	0	0	0	0	0	0	0	0	0	0	0	0	0	0	0	0	0	0	0	0	0	0	0	0	0	0	0	0	0	0	0
44	0	0	0	0	0	0	0	0	0	0	0	0	0	0	0	0	0	0	0	0	0	0	0	0	0	0	0	0	0	0	0	0	0	0	0	0	0	0	0	0	0	0	0	0	0	0	0	0	0
48	0	0	0	0	0	0	0	0	0	0	0	0	0	0	0	0	0	0	0	0	0	0	0	0	0	0	0	0	0	0	0	0	0	0	0	0	0	0	0	0	0	0	0	0	0	0	0	0	0
50	0	0	0	0.156257	0.33172	0.658752	1.25284	2.31035	4.16119	7.3532	12.7855	15.2406	17.8808	20.9512	24.2378	27.7355	31.4391	36.9797	42.9032	50.6578	58.9217	64.0776	69.4002	72.2721	85.0487	93.8224	126.243	160.544	166.888	172.408	178.081	183.91	189.9	196.053	202.375	208.87	215.542	222.396	286.794	374.89	489.981	640.323	836.689	1093.14	1440.43	1897.84	2601.51	2925.24	3003.39
51	0	0	0	0	0	0	0	0	0	0	0	0	0	0	0	0	0	0	0	0	0	0	0	0	0	0	0	0	0	0	0	0	0	0	0	0	0	0	0	0	0	0	0	0	0	0	0	0	0
52	0	0	0	0	0	0	0	0	0	0	0	0	0	0	0	0	0	0	0	0	0	0	0	0	0	0	0	0	0	0	0	0	0	0	0	0	0	0	0	0	0	0	0	0	0	0	0	0	0
56	0	0	0	0	0	0	0	0	0	0	0	0	0	0	0	0	0	0	0	0	0	0	0	0	0	0	0	0	0	0	0	0	0	0	0	0	0	0	0	0	0	0	0	0	0	0	0	0	0
60	0	0	0	0	0	0	0	0	0	0	0	0	0	0	0	0	0	0	0	0	0	0	0	0	0	0	0	0	0	0	0	0	0	0	0	0	0	0	0	0	0	0	0	0	0	0	0	0	0
64	0	0	2.97408e-05	8.36461e-05	0.00013941	0.000217828	0.000326743	0.0004765	0.000680714	0.000957254	0.00132952	0.0022289	0.00369528	0.00607082	0.00989808	0.0160349	0.025834	0.0414235	0.0661439	0.0701526	0.0741613	0.0781701	0.0821788	0.0948063	0.108235	0.141307	0.196427	0.255556	0.282852	0.291881	0.301147	0.310656	0.320414	0.330427	0.340701	0.351242	0.362057	0.373152	0.480667	0.660674	0.907973	1.24768	1.71426	2.35504	3.30683	4.64274	6.51759	7.55247	8.03414
68	0	0	0	0	0	0	0	0	0	0	0	0	0	0	0	0	0	0	0	0	0	0	0	0	0	0	0	0.00207721	0.00428999	0.00885846	0.0182889	0.0377523	0.0779168	0.160787	0.331745	0.684372	1.41162	2.91127	6.00325	7.21033	8.65897	8.8687	9.08093	10.9625	9.52909	8.06195	13.2918	11.7436	13.5852
70	0	0	0	0	0	0	0	0	0	0	0	0	0	0	0	0	0	0	0	0	0	0	0	0	0	0	0	0	0	0	0	0	0	0	0	0	0	0	0	0	0	0	0	0	0	0	0	0	0
72	0	0	0	0	0	0	0	0	0	0	0	0	0	0	0	0	0	0	0	0	0	0	0	0	0	0	0	0	0	0	0	0	0	0	0	0	0	0	0	0	0	0	0	0	0	0	0	0	0
76	0	0	0	0	0	0	0	0	0	0	0	0	0	0	0	0	0	0	0	0	0	0	0	0	0	0	0	2.86414e-06	6.67757e-06	1.56463e-05	3.68485e-05	8.72319e-05	0.000207578	0.000496505	0.0011936	0.0028836	0.00699957	0.0170679	0.0442237	0.109886	0.282296	0.693161	1.65082	3.84619	8.81594	19.8281	49.7902	121.942	308.72
84	0	0	0	0	0	0	0	0	0	0	0	0	0	0	0	0	0	0	0	0	0	0	0	0	0	0	0	2.43295e-09	5.33493e-09	1.16963e-08	2.56388e-08	5.6192e-08	1.23135e-07	2.69787e-07	5.91009e-07	1.2945e-06	2.83496e-06	6.20771e-06	1.35911e-05	2.84149e-05	5.93991e-05	0.000124153	0.000259466	0.000542188	0.00123333	0.00280515	0.00637946	0.0145065	0.032777
86	0	0	0	0	0	0	0	0	0	0	0	0	0	0	0	0	0	0	0	0	0	0	0	0	0	0	0	0	0	0	0	0	0	0	0	0	0	0	0	0	0	0	0	0	0	0	0	0	0
90	0	0	2.3007e-11	6.47073e-11	1.61768e-10	3.79144e-10	8.53074e-10	1.8661e-09	3.99879e-09	8.43494e-09	1.75728e-08	4.41904e-08	1.09895e-07	2.70812e-07	6.62311e-07	1.60942e-06	3.88942e-06	9.35473e-06	2.24061e-05	5.3469e-05	0.00012718	0.000301623	0.000713454	0.00168358	0.00396424	0.00931595	0.0218529	0.0511758	0.0639808	0.0799334	0.0997887	0.124477	0.155142	0.193184	0.240318	0.298631	0.370657	0.459459	0.568716	0.593487	0.618201	0.642589	0.666305	0.688905	0.695634	0.699445	0.699516	0.69472	0.679167
92	0	0	0	0	0	0	0	0	0	0	0	0	0	0	0	0	0	0	0	0	0	0	0	0	0	0	0	0	0	0	0	0	0	0	0	0	0	0	0	0	0	0	0	0	0	0	0	0	0
96	0	0	9.54671e-10	2.68501e-09	6.71253e-09	1.57325e-08	3.53981e-08	7.74334e-08	1.65929e-07	3.50006e-07	7.29179e-07	1.83367e-06	4.56005e-06	1.12373e-05	2.74824e-05	6.67823e-05	0.000161391	0.000388172	0.000929735	0.00147912	0.00234547	0.00445005	0.0116956	0.0202392	0.034659	0.0452493	0.0884528	0.165714	0.17388	0.191772	0.211466	0.233141	0.256993	0.283237	0.312109	0.343868	0.378797	0.41721	0.459447	0.488133	0.518533	0.550747	0.584879	0.621039	0.639159	0.65772	0.708384	0.759746	0.806725
100	0	0	0	0	0	0	0	0	0	0	0	0	0	0	0	0	0	0	0	0	0.574619	0.658676	0.74021	0.83475	0.480467	0.729921	1.18903	1.23757	1.29659	1.3762	1.46046	1.54962	1.64396	1.74377	1.84936	1.96105	2.07919	2.20413	2.33625	2.47604	2.58416	2.75108	2.92842	3.01261	3.098	3.65039	4.23254	4.07777	4.78801
104	0	0	0	0.000433816	0.000932148	0.00187554	0.00361822	0.00677707	0.0124166	0.225315	0.699083	0.855761	1.02737	1.21369	1.41451	1.62962	1.85881	2.10186	2.35856	2.62871	2.91208	3.8196	4.79681	4.84103	5.99954	7.23187	8.44303	9.71891	10.0408	10.3676	10.6992	11.0357	11.377	11.7232	12.0743	12.4301	12.7908	13.1563	14.1919	15.2471	15.3018	156.174	300.075	447.001	596.946	749.906	1074.55	2109.95	2464.9
108	0	0	5.53912e-10	1.66174e-09	4.43129e-09	1.10782e-08	2.65878e-08	6.20381e-08	1.41801e-07	3.19053e-07	7.09007e-07	1.72892e-06	4.16925e-06	9.96289e-06	2.36274e-05	5.56747e-05	0.00013047	0.000304294	0.000706747	0.00140546	0.0026744	0.0051446	0.00955735	0.0173081	0.0307375	0.0537448	0.0924526	0.157461	0.162186	0.166305	0.170587	0.175048	0.179708	0.184587	0.189712	0.195112	0.200824	0.20689	0.213362	0.220307	0.227806	0.235962	0.244911	0.254834	0.265978	0.278695	0.293507	0.311232	0.331171
112	0	0	0	0	0	0	0	0	0	0	0	0	0	0	0	0	0	0	0	0	0	0	0	0	0	0	0	0	0	0	0	0	0	0	0	0	0	0	0	0	0	0	0	0	0	0	0	0	0
116	0	0	0	0	0.11815	0.314108	0.80359	2.0038	4.90756	11.8638	28.4056	34.0238	40.301	47.3023	55.099	63.7689	73.3967	84.0746	95.9032	106.888	118.41	136.674	156.037	176.481	197.99	220.545	254.048	289.277	296.467	303.741	311.1	318.543	326.07	333.681	341.375	349.154	357.015	364.961	372.989	381.101	392.639	406.366	420.519	435.112	450.156	485.163	525.161	568.392	611.269
120	0	0	3.382e-07	1.14142e-06	3.42427e-06	9.63076e-06	2.60031e-05	6.8258e-05	0.000175521	0.000444287	0.00111072	0.0021281	0.00403218	0.00757062	0.0141068	0.0261176	0.0480896	0.0881248	0.160818	0.292396	0.529893	0.638326	0.766927	0.919244	1.09943	1.31233	1.56363	1.85995	1.87026	1.91321	1.95763	2.00368	2.05151	2.10132	2.15332	2.2078	2.26504	2.32543	2.38943	2.45759	2.53061	2.60938	2.69505	2.78914	2.89374	3.01179	3.14759	3.30788	3.48198
124	0	0	0	0	0	0	0	0	0	0	0	0	0	0	0	0	0	0	0	0	0	0	0	0	0	0	0	0	0	0	0	0	0	0	0	0	0	0	0	0	0	0	0	0	0	0	0	0	0
132	0	0	0	0	0	0	0	0	0	0	0	0	0	0	0	0	0	0	0	0	0	0	0	0	0	0	0	0	0	0	0	0	0	0	0	0	0	0	0	0	0	0	0	0	0	0	0	0	0
136	0	0	0	0	0	0	0	0	0	0	0	0	0	0	0	0	0	0	0	0	0	0	0	0	0	0	0	0	0	0	0	0	0	0	0	0	0	0	0	0	0	0	0	0	0	0	0	0	0
140	0	0	4.01536e-07	1.35518e-06	4.06555e-06	1.14344e-05	3.08728e-05	8.10411e-05	0.000208391	0.000527491	0.00131873	0.00232716	0.00406126	0.00702323	0.0120536	0.0205545	0.0348586	0.0588357	0.098892	0.165609	0.276429	0.306707	0.339406	0.374697	0.412763	0.453798	0.498009	0.545616	0.55474	0.570357	0.586692	0.60382	0.621827	0.640815	0.6609	0.682226	0.704959	0.729305	0.755514	0.783896	0.814845	0.848863	0.886611	0.928976	0.977186	1.033	1.09906	1.17956	1.27369
144	0	0	0.00231612	0.00630552	0.0152424	0.0345022	0.0748803	0.157786	0.325222	0.658827	1.31591	1.70846	2.14873	2.63605	3.16975	3.74917	4.37364	5.04249	5.75507	6.5107	7.30871	8.62777	10.0325	10.1599	10.1475	11.344	14.7154	18.2943	18.6311	18.4975	18.3618	18.2241	18.0845	17.9432	17.8002	17.6558	17.51	17.3629	17.2147	17.0654	20.1819	25.5021	32.2208	36.7423	41.3514	41.3882	130.998	165.869	168.326
148	0	0	7.23656e-07	2.17097e-06	5.78925e-06	1.44731e-05	3.47355e-05	8.10495e-05	0.000185256	0.000416826	0.00092628	0.00177472	0.00336263	0.00631351	0.0117643	0.0217808	0.0401043	0.0734916	0.134114	0.225216	0.375925	0.638945	1.07786	1.85637	3.2471	5.43932	9.92386	17.7067	18.2951	18.4426	18.5847	18.7213	18.8519	18.9762	19.0939	19.2044	19.3073	19.4021	19.4882	19.5649	19.6315	19.6874	19.7317	19.7637	19.7828	19.7887	19.7821	19.7656	19.6233
152	0	0	0	0	0	0	0	0	0	0	0	0	0	0	0	0	0	0	0	0	0	0	0	0	0	0	0	1.05368e-07	2.19166e-07	4.55787e-07	9.47713e-07	1.97025e-06	4.09538e-06	8.51139e-06	1.76864e-05	3.67465e-05	7.63357e-05	0.000158554	0.000329283	0.000735985	0.00164479	0.00367534	0.00919387	0.0233699	0.0556929	0.131013	0.300215	0.681437	1.5802
156	0	0	0.0309763	0.112442	0.362408	1.09378	3.16512	8.8926	24.4389	39.6061	282.353	278.699	257.603	142.577	211.521	282.543	407.369	359.989	299.758	383.449	374.795	969.763	1160.54	940.611	873.525	1163.86	1298.44	1364.79	1446.61	1682.64	1811.52	2063.84	2605.74	2914.08	3294.31	4174.32	4575.85	4524.3	5357.81	5588.89	6222.16	6654.49	7026.35	6980.78	5985.93	6119.48	6376.49	6862.8	7284.93
158	0	0	0.000550674	0.00159913	0.00412328	0.00995556	0.023047	0.0518016	0.11389	0.246096	0.524312	0.614117	0.709548	0.810524	0.916959	1.02877	1.14587	1.26819	1.39563	1.52811	1.66554	2.16943	2.73694	3.37083	4.07376	4.84835	5.17921	27.594	31.883	34.0809	36.4238	38.9212	41.5828	44.4191	47.4412	50.6611	54.0912	57.745	61.6366	65.781	68.5444	71.8722	75.3516	78.8723	82.463	86.302	90.2162	104.677	279.115
162	0	0	0	0	0	0	0	0	0	0	0	0	0	0	0	0	0	0	0	0	0	0	0	0	0	0	0	0	0	0	0	0	0	0	0	0	0	0	0	0	0	0	0	0	0	0	0	0	0
166	0	0	0	0	0	0	0	0	0	0	0	0	0	0	0	0	0	0	0	0	0	0	0	0	0	0	0	0	0	0	0	0	0	0	0	0	0	0	0	0	0	0	0	0	0	0	0	0	0
170	0	0	0	0	0	0	0	0	0	0	0	0	0	0	0	0	0	0	0	0	0	0	0	0	0	0	0	1.32437e-07	2.87194e-07	6.20017e-07	1.33327e-06	2.85697e-06	6.1027e-06	1.29987e-05	2.76158e-05	5.85317e-05	0.00012379	0.000261286	0.000498785	0.000948603	0.00228186	0.00553869	0.0134422	0.0293354	0.0636674	0.155006	0.366486	0.879072	2.15946
174	0	0	0	0	0	0	0	0	0	0	0	0	0	0	0	0	0	0	0	0.00430486	0.0136525	0.0259029	0.0476548	0.085679	0.151308	0.263388	0.514868	0.964589	0.971336	1.0531	1.14154	1.2372	1.34066	1.45254	1.5735	1.70428	1.84565	1.99845	2.16359	2.34205	2.53488	2.74322	2.9683	3.21143	3.47403	3.75764	4.06392	4.39464	4.72202
175	0	0	0	0	0	0	0	0	0	0	0	0	0	0	0	0	0	0	0	0	0	0	0	0	0	0	0	0	0	0	0	0	0	0	0	0	0	0	0	0	0	0	0	0	0	0	0	0	0
178	0	0	1.44294e-07	4.32883e-07	1.15435e-06	2.88589e-06	6.92613e-06	1.6161e-05	3.69393e-05	8.31135e-05	0.000184697	0.000353873	0.000670496	0.00125889	0.00234576	0.004343	0.00799664	0.0146539	0.0267418	0.0486214	0.0881138	0.159217	0.286941	0.515894	0.925524	1.65713	2.96168	5.28439	5.31278	5.36007	5.40599	5.45048	5.49341	5.5347	5.57422	5.61182	5.64738	5.6807	5.71159	5.73984	5.76519	5.78734	5.80596	5.82067	5.83105	5.83665	5.83705	5.83201	5.78558
180	0	0	6.96864e-06	2.01337e-05	5.17593e-05	0.000124874	0.000289516	0.000653268	0.00144546	0.00315163	0.0067939	0.0148412	0.0321038	0.0689024	0.14694	0.311713	0.65835	1.38528	2.90559	5.20034	9.16251	11.2674	13.5374	15.9725	19.5013	23.2777	25.785	28.4161	29.0224	29.594	30.1802	30.7824	31.4021	32.0411	32.7015	33.3856	34.0964	34.8373	35.6124	36.4268	37.2867	38.2002	39.1774	40.2316	41.3811	42.6511	44.0785	45.7197	47.3697
184	0	0	0	0	0	0	0	0	0	0	0	0	0	0	0	0	0	0	0	0	0	0	0	0	0	0	0	0	0	0	0	0	0	0	0	0	0	0	0	0	0	0	0	0	0	0	0	0	0
188	0	0	0	0	0	0	0	0	0	0	0	0	0	0	0	0	0	0	0	0	0	0	0	0	0	0	0	2.93455e-07	6.43485e-07	1.41078e-06	3.09249e-06	6.77773e-06	1.48522e-05	3.2541e-05	7.12858e-05	0.000156139	0.000341946	0.000748757	0.00169299	0.00382521	0.00914096	0.0221274	0.0523363	0.121479	0.310921	0.805978	1.98786	5.1618	2.862
191	0	0	0	0	0	0	0	0	0	0	0	0	0	0	0	0	0	0	0	0	0	0	0	0	0	0	0	0	0	0	0	0	0	0	0	0	0	0	0	0	0	0	0	0	0	0	0	0	0
192	0	0	0	0	0	0	0	0	0	0	0	0	0	0	0	0	0	0	0	0	0	0	0	0	0	0	0	9.59415e-08	2.25955e-07	5.32064e-07	1.25266e-06	2.94868e-06	6.93993e-06	1.63311e-05	3.84244e-05	9.03931e-05	0.000212618	0.000500039	0.00117584	0.0027646	0.00701673	0.0177412	0.0448513	0.0962437	0.205813	0.445225	0.964311	2.08836	5.51544
196	0	0	0	0	0	0	0	0	0	0	0	0	0	0	0	0	0	0	0	0	0	0	0	0	0	0	0	0	0	0	0	0	0	0	0	0	0	0	0	0	0	0	0	0	0	0	0	0	0
203	0	0	0	0	0	0	0	0	0	0	0	0	0	0	0	0	0	0	0	0	0	0	0	0	0	0	0	0	0	0	0	0	0	0	0	0	0	0	0	0	0	0	0	0	0	0	0	0	0
204	0	0	2.25084e-07	8.44064e-07	2.81355e-06	8.79234e-06	2.6377e-05	7.69329e-05	0.000219808	0.000618211	0.00171725	0.0032902	0.00623406	0.0117048	0.0218101	0.0403799	0.0743503	0.136248	0.248637	0.452066	0.819255	0.986902	1.18573	1.42122	1.67324	1.94179	2.09189	2.09065	1.95556	1.82888	1.71012	1.59881	1.49451	1.39679	1.30526	1.21955	1.1393	1.06418	0.993881	0.942598	0.893843	0.8475	0.803459	0.761612	0.785695	0.810444	0.835876	0.862009	0.883304
208	0	0	0	0	0	0	0	0	0	0	0	0	0	0	0	0	0	0	0	0	0	0	0	0	0	0	0	0	0	0	0	0	0	0	0	0	0	0	0	0	0	0	0	0	0	0	0	0	0
212	0	0	0	0	0	0	0	0	0	0	0	0	0	0	0	0	0	0	0	0	0	0	0	0	0	0	0	0	0	0	0	0	0	0	0	0	0	0	0	0	0	0	0	0	0	0	0	0	0
214	0	0	0	0	0	0	0	0	0	0	0	0	0	0	0	0	0	0	0	0	0	0	0	0	0	0	0	1.85562	1.94261	2.03291	2.12658	2.22368	2.32428	2.42841	2.53613	2.64747	2.76245	2.88106	3.0033	3.21855	3.44739	3.69044	3.9483	4.22157	5.5257	7.22763	9.49552	12.3855	15.4501
218	0	0	0	0	0	0	0	0	0	0	0	0	0	0	0	0	0	0	0	0	0	0	0	0	0	0	0	1.18965e-07	2.41129e-07	4.88659e-07	9.9012e-07	2.00585e-06	4.06293e-06	8.22835e-06	1.66617e-05	3.37336e-05	6.82876e-05	0.000138216	0.000279716	0.000566	0.00143069	0.00330731	0.00764452	0.017325	0.0388038	0.0896051	0.199251	0.443016	1.02767
222	0	0	0	0	0	0	0	0	0	0	0	0	0	0	0	0	0	0	0	0	0	0	0	0	0	0	0.231101	0.2624	0.268866	0.27626	0.284948	0.295454	0.308535	0.325298	0.347361	0.413193	0.480509	0.549309	0.619594	0.691363	0.810222	0.931601	1.0555	1.25093	1.4504	1.75592	2.06768	2.38566	3.0635
226	0	0	0	0	0	0	0	0	0	0	0	0	0	0	0	0	0	0	0	0	0	0	0	0	0	0	0	0	0	0	0	0	0	0	0	0	0	0	0	0	0	0	0	0	0	0	0	0	0
231	0	0	0	0	0	0	0	0	0	0	0	0	0	0	0	0	0	0	0	0	0	0	0	0	0	0	0	0	0	0	0	0	0	0	0	0	0	0	0	0	0	0	0	0	0	0	0	0	0
232	0	0	0	0	0	0	0	0	0	0	0	0	0	0	0	0	0	0	0	0	0	0	0	0	0	0	0	0	0	0	0	0	0	0	0	0	0	0	0	0	0	0	0	0	0	0	0	0	0
233	0	0	0	0	0	0	0	0	0	0	0	0	0	0	0	0	0	0	0	0	0	0	0	0	0	0	0	0	0	0	0	0	0	0	0	0	0	0	0	0	0	0	0	0	0	0	0	0	0
234	0	0	0	0	0	0	0	0	0	0	0	0	0	0	0	0	0	0	0	0	0	0	0	0	0	0	0	0	0	0	0	0	0	0	0	0	0	0	0	0	0	0	0	0	0	0	0	0	0
238	0	0	0	0	0	0	0	0	0	0	0	0	0	0	0	0	0	0	0	0	0	0	0	0	0	0	0	0	0	0	0	0	0	0	0	0	0	0	0	0	0	0	0	0	0	0	0	0	0
242	0	0	0	0	0	0	0	0	0	0	0	0	0	0	0	0	0	0	0	0	0	0	0	0	0	0	0	0	0	0	0	0	0	0	0	0	0	0	0	0	0	0	0	0	0	0	0	0	3.816
246	0	0	0	0	0	0	0	0	0	0	0	0	0	0	0	0	0	0	0	0	0	0	0	0	0	0	0	0	0	0	0	0	0	0	0	0	0	0	0	0	0	0	0	0	0	0	0	0	0
250	0	0	0	0	0	0	0	0	0	0	0	0	0	0	0	0	0	0	0	0	1.68821	3.17702	4.51367	7.22175	5.22636	7.42454	9.53513	11.9172	12.4058	12.9031	13.4091	13.9237	14.447	14.9649	15.4911	16.0257	16.5686	17.1198	18.5549	19.8604	20.897	22.1969	23.5086	24.3121	24.99	26.0936	27.0094	27.8119	28.4531
254	0	0	0	0	0	0	0	0	0	0	0	0	0	0	0	0	0	0	0	0	0	0	0	0	0	0	0	0.02897	0.0322059	0.035779	0.0397201	0.0440619	0.0488388	0.0540869	0.0598433	0.0661456	0.0730314	0.0805369	0.0886952	0.0975348	0.107076	0.117326	0.128276	0.139889	0.152091	0.164751	0.177658	0.190475	0.201406
258	0	0	0	0	0	0	0	0	0	0	0	0	0	0	0	0	0	0	0	0	0	0	0	0	0	0	0	0	0	0	0	0	0	0	0	0	0	0	0	0	0	0	0	0	0	0	0	0	0
262	0	0	0	0	0	0	0	0	0	0	0	0	0	0	0	0	0	0	0	0	0	0	0	0	0	0	0	0	0	0	0	0	0	0	0	0	0	0	0	0	0	0	0	0	0	0	0	0	0
266	0	0	3.20253e-08	1.08085e-07	3.24256e-07	9.1197e-07	2.46232e-06	6.46358e-06	1.66206e-05	4.2071e-05	0.000105178	0.000201517	0.000381821	0.000716888	0.00133582	0.00247317	0.00455377	0.00834484	0.0152284	0.027688	0.0501774	0.090668	0.163402	0.293781	0.527049	0.94367	1.68656	3.00925	3.07119	3.09795	3.12386	3.14887	3.1729	3.1959	3.21777	3.23842	3.25775	3.27562	3.29191	3.30644	3.31901	3.3294	3.33732	3.34242	3.3443	3.34243	3.33616	3.32471	3.28649
268	0	0	0	0	0	0	0	0	0	0	0	0	0	0	0	0	0	0	0	0	0	0	0	0	0	0	0	0	0	0	0	0	0	0	0	0	0	0	0	0	0	0	0	0	0	0	0	0	0
270	0	0	6.81988e-09	2.04596e-08	5.4559e-08	1.36398e-07	3.27354e-07	7.63826e-07	1.74589e-06	3.92825e-06	8.72944e-06	1.67253e-05	3.16901e-05	5.94997e-05	0.000110869	0.000205266	0.00037795	0.000692599	0.00126391	0.00229802	0.00416458	0.00752519	0.0135619	0.024383	0.0437436	0.0783219	0.13998	0.24976	0.228521	0.209053	0.191211	0.174863	0.159887	0.14617	0.13361	0.122112	0.111586	0.101953	0.0931394	0.141336	0.214444	0.325326	0.493479	0.748454	1.13504	1.72108	2.60943	3.95584	5.95883
275	0	0	0	0	0	0	0	0	0	0	0	0	0	0	0	0	0	0	0	0	0	0	0	0	0	0	0	0	0	0	0	0	0	0	0	0	0	0	0	0	0	0	0	0	0	0	0	0	0
276	0	0	0	0	0	0	0	0	0	0	0	0	0	0	0	0	0	0	0	0	0	0	0	0	0	0	0	0	0	0	0	0	0	0	0	0	0	0	0	0	0	0	0	0	0	0	0	0	0
288	0	0	3.75166e-07	1.26619e-06	3.79856e-06	1.06835e-05	2.88453e-05	7.5719e-05	0.000194706	0.000492849	0.00123212	0.00236071	0.00447292	0.00839813	0.0156487	0.0289724	0.0533461	0.0977573	0.178396	0.324356	0.587813	1.06215	1.9142	3.44156	6.17423	11.0548	19.7575	35.2525	35.5463	35.8296	36.1016	36.3617	36.6089	36.8424	37.0611	37.2638	37.4491	37.6156	37.7612	37.8841	37.9816	38.0509	38.0885	38.0902	38.0509	37.9644	37.823	37.6176	37.105
292	0	0	0	0	0	0	0	0	0	0	0	0	0	0	0	0	0	0	0	0	0	0	0	0	0	0	0	0	0	0	0	0	0	0	0	0	0	0	0	0	0	0	0	0	0	0	0	0	0
296	0	0	0	0	0	0	0	0	0	0	0	0	0	0	0	0	0	0	0	0	0	0	0	0	0	0	0	0	0	0	0	0	0	0	0	0	0	0	0	0	0	0	0	0	0	0	0	0	0
300	0	0	0	0	0	0	0	0	0	0	0	0	0	0	0	0	0	0	0	0	0.962939	1.64428	1.87266	2.0983	1.58104	1.83479	2.8693	2.98641	3.16275	3.34267	3.52619	3.71331	3.90401	4.09831	4.2962	4.49768	4.70276	4.91143	5.12369	5.33954	5.91952	6.56089	7.27251	8.05869	8.9312	9.99603	11.184	12.5135	13.4728
304	0	0	0	0	0	0	0	0	0	0	0	0	0	0	0	0	0	0	0	0	0	0	0	0	0	0	0	0	0	0	0	0	0	0	0	0	0	0	0	0	0	0	0	0	0	0	0	0	0
308	0	0	0	0	0	0	0	0	0	0	0	0	0	0	0	0	0	0	0	0	0	0	0	0	0	0	0	0	0	0	0	0	0	0	0	0	0	0	0	0	0	0	0	0	0	0	0	0	0
312	0	0	0	0	0	0	0	0	0	0	0	0	0	0	0	0	0	0	0	0	0	0	0	0	0	0	0	0	0	0	0	0	0	0	0	0	0	0	0	0	0	0	0	0	0	0	0	0	0
316	0	0	0	0	0	0	0	0	0	0	0	0	0	0	0	0	0	0	0	0	0	0	0	0	0	0	0	0	0	0	0	0	0	0	0	0	0	0	0	0	0	0	0	0	0	0	0	0	0
320	0	0	0	0	0	0	0	0	0	0	0	0	0	0	0	0	0	0	0	0	0	0	0	0	0	0	0	0.000553547	0.0011068	0.00221261	0.00442253	0.00883821	0.0176599	0.0352813	0.0704749	0.140754	0.281075	0.561206	1.12037	1.1185	1.27738	1.45379	1.65436	1.89959	2.14993	2.36161	2.51334	2.67451	2.97791
324	0	0	3.88216e-07	1.31023e-06	3.93068e-06	1.1055e-05	2.98486e-05	7.83526e-05	0.000201478	0.000509992	0.00127498	0.00244282	0.0046285	0.00869024	0.016193	0.0299802	0.0552016	0.101158	0.184601	0.335638	0.608258	1.09909	1.98078	3.56127	6.38898	11.4393	20.4447	36.4787	37.2101	37.9621	38.7367	39.5362	40.363	41.2203	42.1114	43.0406	44.0128	45.0337	46.1105	47.252	48.469	49.7755	51.1892	52.7339	54.4417	56.3579	58.5488	61.1172	63.8322
328	0	0	0	0	0	0	0	0	0	0	0	0	0	0	0	0	0	0	0	0	0	0	0	0	0	0	0	2.08156e-07	4.41952e-07	9.38178e-07	1.99124e-06	4.2256e-06	8.96571e-06	1.90201e-05	4.03437e-05	8.55604e-05	0.000181429	0.000384663	0.000815443	0.00173668	0.0036982	0.00787416	0.0167634	0.0356836	0.078164	0.171196	0.374914	0.820954	1.78622
332	0	0	0	0	0	0	0	0	0	0	0	0	0	0	0	0	0	0	0	0	0	0	0	0	0	0	0	0.000931378	0.00147468	0.00233451	0.00369504	0.00584752	0.00925241	0.0146376	0.0231536	0.0366187	0.0579061	0.0915554	0.144738	0.228783	0.326916	0.442809	0.599711	0.843623	1.17436	1.58146	2.25424	3.21288	4.67674
334	0	0	0	0	0	0	0	0	0	0	0	0	0	0	0	0	0	0	0	0	0	0	0	0	0	0	0	0	0	0	0	0	0	0	0	0	0	0	0	0	0	0	0	0	0	0	0	0	0
336	0	0	0	0	0	0	0	0	0	0	0	0	0	0	0	0	0	0	0	0	0	0	0	0	0	0	0	0	0	0	0	0	0	0	0	0	0	0	0	0	0	0	0	0	0	0	0	0	0
340	0	0	0	0	0	0	0	0	0	0	0	0	0	0	0	0	0	0	0	0	0	0	0	0	0	0	0	9.10817e-09	1.90958e-08	4.00283e-08	8.38927e-08	1.75796e-07	3.68321e-07	7.71568e-07	1.61606e-06	3.38434e-06	7.08645e-06	1.48362e-05	3.10566e-05	6.50022e-05	0.000250474	0.00059108	0.00139468	0.00314004	0.00683749	0.014887	0.032409	0.0705467	0.152586
0	0	0	0	0	0	0	0	0	0	0	0	0	0	0	0	0	0	0	0	0	0	0	0	0	0	0	0	0	0	0	0	0	0	0	0	0	0	0	0	0	0	0	0	0	0	0	0	0	0
348	0	0	0	0	0	0	0	0	0	0	0	0	0	0	0	0	0	0	0	0	0.600606	0.759685	1.06486	1.745	1.46093	1.90733	1.98849	2.48359	2.78835	3.10026	3.41932	3.74553	4.07888	4.41939	4.76704	5.12184	5.48379	5.85289	6.22914	6.61254	7.55808	8.52339	9.16649	9.70164	10.356	11.2439	12.2625	13.6997	14.9912
352	0	0	0	0	0	0	0	0	0	0	0	0	0	0	0	0	0	0	0	0	0	0	0	0	0	0	0	0	0	0	0	0	0	0	0	0	0	0	0	0	0	0	0	0	0	0	0	0	0
356	0	0	0	0.565761	1.43755	3.42038	7.80282	17.2826	37.4438	79.7312	167.395	195.597	225.502	257.083	290.316	325.175	361.635	399.67	439.255	480.363	522.971	567.052	612.582	659.533	707.882	757.603	808.67	1023.96	1060.18	1096.97	1134.33	1172.26	1210.77	1249.84	1289.47	1329.68	1370.45	1411.79	1817.11	2293	3053.34	3786.79	5235.79	6956.49	9219.21	11698.4	16061.4	17034.5	15129.1
360	0	0	0.00166507	0.00453307	0.0109578	0.0248038	0.0538318	0.113433	1.37165	4.14272	9.68722	11.7236	13.9397	16.333	18.9008	21.6408	24.5502	27.6264	30.867	34.2693	37.8308	44.107	50.7753	57.8296	76.8103	97.0806	110.496	127.942	130.951	133.994	137.07	140.178	143.32	152.296	161.443	170.76	180.247	189.904	202.803	215.94	229.315	242.927	256.775	330.871	406.465	483.556	562.14	642.216	1422.51
364	0	0	3.09039e-06	9.68955e-06	5.29432e-05	0.000187299	0.000589992	0.00147498	0.0032871	0.00682705	0.0227568	0.0397408	0.0685215	0.116901	0.197658	0.331642	0.552737	0.80652	1.16046	1.93625	3.21314	5.36247	8.90127	9.80226	16.4864	27.5505	53.8554	84.0804	87.8731	89.9271	91.9798	94.0269	96.0636	98.0845	100.084	102.055	103.99	105.88	107.716	109.488	115.038	120.397	125.538	130.427	135.028	153.862	171.919	184.399	194.751
368	0	0	5.01508e-06	1.25488e-05	2.79226e-05	9.51907e-05	0.00051403	0.00149925	0.00449776	0.0108428	0.0144571	0.0254487	0.0442004	0.0726149	0.118394	0.18308	0.280916	0.788261	1.79811	2.57456	3.62891	3.34693	2.76459	2.10869	2.20677	2.30485	3.00366	2.501	2.53478	2.56857	2.60237	2.63618	2.67	2.70383	2.73767	2.77153	2.80539	2.83927	3.02387	3.22003	3.42847	3.64992	3.88519	4.13512	4.77778	5.51967	6.37603	7.36441	8.4519
372	0	0	0	0	0	0	0	0	0	0	0	0	0	0	0	0	0	0	0	0	0	0	0	0	0	0	0	0	0	0	0	0	0	0	0	0	0	0	0	0	0	0	0	0	0	0	0	0	0
376	0	0	0	0	0	0	0	0	0	0	0	0	0	0	0	0	0	0	0	0	0	0	0	0	0	0	0	0	0	0	0	0	0	0	0	0	0	0	0	0	0	0	0	0	0	0	0	0	0
380	0	0	0	0	0	0	0	0	0	0	0	0	0	0	0	0	0	0	0	0	4.69606	9.28107	12.7592	19.6788	13.1802	15.4868	23.8114	25.1717	26.2919	27.5564	28.8768	30.2555	31.695	33.1978	34.7665	36.404	38.113	39.8966	41.7579	43.7002	47.1316	50.8269	54.806	59.0873	61.1599	65.6109	181.42	154.85	137.376
384	0	0	1.0699e-06	3.37018e-06	9.43652e-06	2.47709e-05	6.24226e-05	0.000152935	0.000367045	0.000867143	0.00202333	0.00387664	0.00734521	0.013791	0.0256975	0.0475771	0.0876024	0.160532	0.292953	0.532642	0.965278	1.74421	3.14341	5.65156	10.139	18.1537	32.4449	57.89	59.0454	60.2305	61.448	62.7009	63.9927	65.3273	66.7095	68.1449	69.6397	71.202	72.8411	74.5685	76.3985	78.3494	80.4444	82.7142	85.2005	87.9616	91.0825	94.6938	98.3926
388	0	0	0	0	0	0	0	0	0	0	0	0	0	0	0	0	0	0	0	0	0	0	0	0	0	0	0	3.18065e-09	7.52047e-09	1.77787e-08	4.20223e-08	9.93091e-08	2.34654e-07	5.54371e-07	1.3095e-06	3.09277e-06	7.3034e-06	1.72441e-05	4.07097e-05	8.45922e-05	0.000175754	0.000365111	0.000758384	0.00157507	0.00360939	0.00827022	0.0189474	0.0434043	0.0987973
392	0	0	0.0035334	0.0115434	0.0334847	0.0909541	0.236878	0.59897	1.48149	3.60141	8.63196	15.7357	23.806	40.0155	57.8571	91.3061	127.183	198.003	249.612	297.766	284.423	297.528	308.748	351.23	442.06	570.683	757.196	1112.79	1209.44	1209.47	1208.69	1207.08	1204.57	1192.84	1180.17	1166.53	1151.85	1136.08	1159.43	1180.81	1199.98	1216.65	1230.49	1255.22	1275.72	1338.07	1645.02	1710.53	1790.37
398	0	0	0	0	0	0	0	0	0	0	0	0	0	0	0	0	0	0	0.323725	0.526722	0.853792	0.919507	0.987228	1.15402	1.35443	1.57967	1.8804	2.20019	2.20833	2.2159	2.22291	2.22937	2.23527	2.24061	2.24539	2.24961	2.25328	2.25639	2.25894	2.26093	2.26236	2.26324	2.26355	2.26331	2.26252	2.94337	3.51359	4.81752	6.10969
400	0	0	0	0	0	0	0	0	0	0	0	0	0	0	0	0	0	0	0	0	0	0	0	0	0	0	0	0	0	0	0	0	0	0	0	0	0	0	0	0	0	0	0	0	0	0	0	0	0
404	0	0	0	0	0	0	0	0	0	0	0	0	0	0	0	0	0	0	0	0	0	0	0	0	0	0	0	0.678902	0.813625	0.951656	1.09299	1.23764	1.35794	1.39373	1.43127	1.47079	1.51253	1.55681	1.604	1.65456	1.70907	1.76828	1.83314	1.90495	1.98544	2.07713	2.18369	2.31091	2.45311
408	0	0	0	0.121378	0.183682	0.259192	0.348985	0.453677	0.573151	0.706185	0.849968	1.19722	1.66743	2.30095	3.1507	4.28605	5.79769	7.80401	10.4593	12.2799	14.1906	17.6558	24.3399	18.8262	22.5984	26.5157	33.9609	43.4162	48.2397	51.3561	54.6644	58.1762	61.9036	65.8593	70.0571	74.5111	79.2367	84.2498	89.5676	95.2079	97.8219	99.253	100.692	102.139	103.595	105.003	107.012	109.046	110.412
410	0	0	0	0.126621	0.194859	0.280175	0.3853	0.513059	0.666245	0.847436	1.05873	1.6088	2.41743	3.59933	5.31819	7.8071	11.3972	16.558	23.9538	28.2561	32.8099	41.0223	56.8353	44.1849	53.3141	62.8876	80.9816	104.1	115.857	125.614	136.169	147.588	159.938	173.294	187.737	203.354	220.237	238.488	258.215	279.536	285.768	289.243	292.723	298.836	305.004	309.444	313.904	318.4	683.097
414	0	0	0	0	0	0	0	0	0	0	0	0	0	0	0	0	0	0	0	0	0	0	0	0	0	0	0	0	0	0	0	0	0	0	0	0	0	0	0	0	0	0	0	0	0	0	0	0	0
417	0	0	8.85107e-07	2.32341e-06	5.42128e-06	1.18591e-05	2.4904e-05	5.08457e-05	0.000101691	0.000200205	0.000389287	0.000699245	0.00124208	0.00218631	0.00381926	0.00662915	0.0114432	0.0196591	0.0336334	0.0558342	0.0922261	0.104988	0.118548	0.132905	0.14806	0.164013	0.19542	0.22882	0.244927	0.261936	0.280079	0.299429	0.320065	0.342069	0.365531	0.390544	0.417207	0.445628	0.475919	0.508201	0.5426	0.579253	0.618303	0.659905	0.704221	0.751425	0.801699	0.85524	0.906555
418	0	0	0.000178584	0.000486186	0.00117526	0.00266029	0.00577363	0.012166	0.0250762	0.0507988	0.101463	0.121466	0.143798	0.168689	0.196388	0.227168	0.261325	0.299182	0.341091	0.423034	0.511384	0.606045	0.706919	0.813911	0.926923	1.04586	1.35668	1.68664	1.7368	1.78767	1.83924	1.89151	1.94448	1.99814	2.0525	2.10756	2.16331	2.21975	2.50137	2.78869	54.2701	59.5302	64.8902	70.35	75.9094	81.5684	121.441	246.847	273.979
422	0	0	0	0	0	0	0	0	0	0	0	0	0	0	0	0	0	0	0	0	0	0	0	0	0	0	0	0	0	0	0	0	0	0	0	0	0	0	0	0	0	0	0	0	0	0	0	0	0
426	0	0	0	0	0	0	0	0	0	0	0	0	0	0	0	0	0	0	0	0	0	0	0	0	0	0	0	0	0	0	0	0	0	0	0	0	0	0	0	0	0	0	0	0	0	0	0	0	0
428	0	0	0	0	0	0	0	0	0	0	0	0	0	0	0	0	0	0	0	0	0	0	0	0	0	0	0	0	0	0	0	0	0	0	0	0	0	0	0	0	0	0	0	0	0	0	0	0	0
430	0	0	2.02113e-06	6.82132e-06	2.0464e-05	5.75549e-05	0.000155398	0.00040792	0.00104894	0.00265512	0.00663781	0.0117138	0.0204423	0.0353514	0.0606717	0.103461	0.175461	0.296149	0.497772	0.83359	1.39141	2.31571	3.84389	6.36537	10.5181	17.3456	28.5532	46.9241	47.9944	49.0992	50.2415	51.4251	52.6541	53.9332	55.268	56.6651	58.1324	59.6793	61.3171	63.06	64.9254	66.9355	69.1193	71.5147	74.174	77.1704	80.6118	84.6657	89.0518
434	0	0	0	0	0	0	0	0	0	0	0	0	0	0	0	0	0	0	0	0	0	0	0	0	0	0	0	0	0	0	0	0	0	0	0	0	0	0	0	0	0	0	0	0	0	0	0	0	0
438	0	0	0	0	0	0	0	0	0	0	0	0	0	0	0	0	0	0	0	0	0	0	0	0	0	0	0	0	0	0	0	0	0	0	0	0	0	0	0	0	0	0	0	0	0	0	0	0	0
440	0	0	0	0	0	0	0	0	0	0	0	0	0	0	0	0	0	0	0	0	0	0	0	0	0	0	0	0	0	0	0	0	0	0	0	0	0	0	0	0	0	0	0	0	0	0	0	0	0
442	0	0	0	0	0	0	0	0	0	0	0	0	0	0	0	0	0	0	0	0	0	0	0	0	0	0	0	0	0	0	0	0	0	0	0	0	0	0	0	0	0	0	0	0	0	0	0	0	0
446	0	0	0	0	0	0	0	0	0	0	0	0	0	0	0	0	0	0	0	0	0	0	0	0	0	0	0	0	0	0	0	0	0	0	0	0	0	0	0	0	0	0	0	0	0	0	0	0	0
450	0	0	1.28504e-08	4.33701e-08	1.3011e-07	3.65935e-07	9.88025e-07	2.59357e-06	6.66917e-06	1.68813e-05	4.22033e-05	0.000141505	0.000469202	0.00154166	0.00502716	0.016288	0.0524836	0.168309	0.537504	1.28268	2.71195	6.07441	12.3962	23.9334	44.5273	91.5594	173.865	319.345	325.68	330.397	335.16	339.975	344.851	349.795	354.818	359.933	365.156	370.506	376.009	381.697	387.61	393.806	400.36	407.378	415.014	423.499	433.197	444.718	456.302
454	0	0	5.4464e-07	1.53576e-06	3.84996e-06	9.04976e-06	2.04253e-05	4.48283e-05	9.63987e-05	0.000204102	0.000426902	0.00087473	0.00177248	0.00355902	0.00709226	0.0140427	0.0276519	0.0541914	0.105761	0.197814	0.360548	0.456044	0.559336	0.670424	0.789307	0.915986	1.03614	1.16291	1.19712	1.23604	1.27708	1.32046	1.36646	1.41539	1.46762	1.52361	1.58389	1.64913	1.72013	1.79793	1.8838	1.97944	2.08706	2.20968	2.35154	2.51878	2.72077	2.97267	3.28042
458	0	0	0.000281226	0.000767602	0.00186063	0.004224	0.0091959	0.0194415	0.0402131	0.0817674	0.163968	0.223018	0.299968	0.399801	0.52882	0.694985	0.908333	1.18151	1.53041	1.8998	2.29812	2.89374	3.53312	4.2156	4.94051	5.70716	6.42607	7.17899	7.3867	7.62335	7.8728	8.13645	8.41595	8.71323	9.03058	9.37071	9.73694	10.1333	10.5646	11.0372	11.559	12.1402	12.7942	13.5396	14.4021	15.4192	16.6479	18.1807	20.0535
462	0	0	0	0	0	0	0	0	0	0	0	0	0	0	0	0	0	0	0	0	0	0	0	0	0	0	0	0	0	0	0	0	0	0	0	0	0	0	0	0	0	0	0	0	0	0	0	0	0
[truncated: 106 more rows]
[truncated: 29 more columns]

## Sheet: upper2grid
ISO1	y-10000	y-9000	y-8000	y-7000	y-6000	y-5000	y-4000	y-3000	y-2000	y-1000	y0	y100	y200	y300	y400	y500	y600	y700	y800	y900	y1000	y1100	y1200	y1300	y1400	y1500	y1600	y1700	y1710	y1720	y1730	y1740	y1750	y1760	y1770	y1780	y1790	y1800	y1810	y1820	y1830	y1840	y1850	y1860	y1870	y1880	y1890	y1900	y1910
[truncated: 234 more rows]
[truncated: 29 more columns]

[truncated: 1 more sheets: for paper]
