# Supplementary material for: New anthropogenic land use estimates for the Holocene; HYDE 3.2
Source: Copernicus journal article supplement (doi:10.5194/essd-2016-58), 2016-12-07
Supplement: Supplementary file 11 [file Table S5.xlsx]

## Sheet: Note
Total irrigated land estimates
Sheetname
data	= baseline (or best estimate) data
lower	= baseline data * first lower uncertainty ratio estimate
upper	= baseline data * first upper uncertainty ratio estimate
lower2	= baseline data * second lower uncertainty ratio estimate
upper2	= baseline data * upper lower uncertainty ratio estimate
2grid	= for export of baseline data to .csv file for computional grid
lower2grid	= for export of lower estimate to .csv file for computional grid
upper2grid	= for export of upper estimate to .csv file for computional grid
for paper	= HYDE 3.2 results and literature estimates

## Sheet: data
Total actual irrigated land estimate, in 1000 ha				Total area equiped for irrigation * ratio AEI / AAI from Siebert et al.							7000 BC		6000 BC		6000 BC		5000 BC		4000 BC
IM22	ISO1	Country	-10000	-9000	-8000	-7000	-6000	-5000	-4000	-3000	-2000	-1000	0	100	200	300	400	500	600	700	800	900	1000	1100	1200	1300	1400	1500	1600	1700	1710	1720	1730	1740	1750	1760	1770	1780	1790	1800	1810	1820	1830	1840	1850	1860	1870	1880	1890
18	4	Afghanistan	0	0	0	0	0	0	0	0	0	0	7.85159	8.72583	9.57326	9.44794	9.31922	9.18683	9.05052	8.64267	8.23895	7.92556	7.61329	7.88286	8.12975	5.56815	5.82837	6.063	7.37603	7.16152	11.27	15.3785	19.4869	23.5954	27.7039	31.8123	35.9208	40.0293	44.1377	48.2462	103.681	159.115	214.55	269.985	325.419	380.854	436.289	491.723	547.158
12	8	Albania	0	0	0	0	0	0	0	0	0	0	0	0	0	0	0	0	0	0	0	0	0	0	0	0	0	0	0	0.441596	0.481709	0.521822	0.561936	0.602049	0.642162	0.682276	0.722389	0.762502	0.802615	0.842729	1.57245	2.30217	3.03189	3.76161	4.49133	5.22105	5.95077	6.6805	7.41022
7	12	Algeria	0	0	0	0	0	0	0	0	0	0	39.2013	37.5228	35.8959	34.3192	32.7913	31.311	29.8769	28.4878	27.1424	28.6957	30.1126	28.4727	26.8783	23.0703	19.4579	19.1726	27.7354	20.7759	25.014	29.2521	33.4902	37.7283	41.9665	46.2046	50.4427	54.6808	58.9189	63.157	75.0693	86.9816	98.8939	110.806	122.719	134.631	146.543	158.455	170.368
24	16	American Samoa	0	0	0	0	0	0	0	0	0	0	0	0	0	0	0	0	0	0	0	0	0	0	0	0	0	0	0	0	0	0	0	0	0	0	0	0	0	0	0	0	0	0	0	0	0	0	0
11	20	Andorra	0	0	0	0	0	0	0	0	0	0	0	0	0	0	0	0	0	0	0	0	0	0	0	0	0	0	0	0	0	0	0	0	0	0	0	0	0	0	0	0	0	0	0	0	0	0	0
10	24	Angola	0	0	0	0	0	0	0	0	0	0	0	0	0	0	0	0	0	0	0	0	0	0	0	0	0.830769	0.95082	1.0117	1.07274	1.50633	1.93992	2.37351	2.80709	3.24068	3.67427	4.10786	4.54145	4.97504	5.40862	6.50839	7.60815	8.70791	9.80767	10.9074	12.0072	13.107	14.2067	15.3065
4	28	Antigua & Barb.	0	0	0	0	0	0	0	0	0	0	0	0	0	0	0	0	0	0	0	0	0	0	0	0	0	0	0	0	0	0	0	0	0	0	0	0	0	0	0	0	0	0	0	0	0	0	0
16	31	Azerbaijan	0	0	0	0	0	0	0	0	0	0	9.59029	10.3093	11.0818	11.9118	12.8036	13.7618	14.7912	15.8972	17.0853	18.1125	19.1454	28.8044	38.5203	48.2926	38.7472	48.5746	58.4572	68.3946	75.4135	82.4325	89.4514	96.4703	103.489	110.508	117.527	124.546	131.565	138.584	188.837	239.09	289.344	339.597	389.85	440.103	490.357	540.61	590.863
6	32	Argentina	0	0	0	0	0	0	0	0	0	0	0	0	0	0	0	0	0	0	0	1.99327	2.27802	2.60345	2.97537	3.40043	3.8862	4.44137	5.07585	5.80098	10.9662	16.1314	21.2966	26.4618	31.627	36.7922	41.9574	47.1226	52.2878	57.453	126.708	195.962	265.217	334.472	403.726	472.981	542.236	611.491	680.745
24	36	Australia	0	0	0	0	0	0	0	0	0	0	0	0	0	0	0	0	0	0	0	0	0	0	0	0	0	0	0	0	0	0	0	0	0	0	0	0	0	0	2.19012	2.92473	3.65935	4.39397	5.12859	5.8632	6.59782	7.33244	8.06705
11	40	Austria	0	0	0	0	0	0	0	0	0	0	0	0	0	0	0	0	0	0	0	0	0	0	0	0	0	0	0	0.262085	0.325735	0.389384	0.453033	0.516682	0.580332	0.643981	0.70763	0.77128	0.834929	0.898578	0	0	0	0	0	0	0	0	0
4	44	Bahamas	0	0	0	0	0	0	0	0	0	0	0	0	0	0	0	0	0	0	0	0	0	0	0	0	0	0	0	0	0	0	0	0	0	0	0	0	0	0	0	0	0	0	0	0	0	0	0
17	48	Bahrain	0	0	0	0	0	0	0	0	0	0	0	0	0	0	0	0	0	0	0	0	0	0	0	0	0	0	0	0.14943	0.171482	0.193535	0.215587	0.23764	0.259692	0.281745	0.303797	0.32585	0.347902	0.369955	0.479959	0.589964	0.699968	0.809973	0.919977	1.02998	1.13999	1.24999	1.36
18	50	Bangladesh	0	0	0	0	0	0	0	0	0	0	0	0	0	0	0	0	0	0	0	0	0	0	0	0	0	0	0	0	0	0	0	0	0	0	0	0	0	0	0	0	0	0	0	0	0	0	0
16	51	Armenia	0	0	0	0	0	0	0	0	0	0	0	0	0	0	0	0	0	0	0	0	0	0	0	0	0	0	0	0.366427	0.453521	0.540616	0.62771	0.714804	0.801899	0.888993	0.976088	1.06318	1.15028	1.23737	2.4942	3.75102	5.00785	6.26468	7.5215	8.77833	10.0352	11.292	12.5488
4	52	Barbados	0	0	0	0	0	0	0	0	0	0	0	0	0	0	0	0	0	0	0	0	0	0	0	0	0	0	0	0	0	0	0	0	0	0	0	0	0	0	0	0	0	0	0	0	0	0	0
11	56	Belgium	0	0	0	0	0	0	0	0	0	0	0	0	0	0	0	0	0	0	0	0	0	0	0	0	0	0	0	0.0810896	0.0946596	0.108229	0.121799	0.135369	0.148939	0.162509	0.176079	0.189649	0.203219	0.216789	0.406524	0.596259	0.785995	0.97573	1.16547	1.3552	1.54494	1.73467	1.92441
4	60	Bermuda	0	0	0	0	0	0	0	0	0	0	0	0	0	0	0	0	0	0	0	0	0	0	0	0	0	0	0	0	0	0	0	0	0	0	0	0	0	0	0	0	0	0	0	0	0	0	0
18	64	Bhutan	0	0	0	0	0	0	0	0	0	0	0	0	0	0	0	0	0	0	0	0	0	0	0	0	0	0	1.86424	2.11845	2.08083	2.04322	2.00561	1.96799	1.93038	1.89276	1.85515	1.81753	1.77992	1.7423	2.36807	2.99384	3.61961	4.24538	4.87115	5.49692	6.12269	6.74846	7.37423
6	68	Bolivia	0	0	0	0	0	0	0	0	0	0	0	0	0	0	0	0	0	0	0	0	0	0	0	0	0	0	0	0.560781	0.641029	0.721278	0.801527	0.881775	0.962024	1.04227	1.12252	1.20277	1.28302	1.36327	1.52694	1.69061	1.85429	2.01796	2.18163	2.34531	2.50898	2.67265	2.83633
12	70	Bsnia.&Hrzgvna.	0	0	0	0	0	0	0	0	0	0	0	0	0	0	0	0	0	0	0	0	0	0	0	0	0	0	0	0.0905108	0.100449	0.110387	0.120326	0.130264	0.140202	0.15014	0.160079	0.170017	0.179955	0.189893	0.370904	0.551915	0.732925	0.913936	1.09495	1.27596	1.45697	1.63798	1.81899
10	72	Botswana	0	0	0	0	0	0	0	0	0	0	0	0	0	0	0	0	0	0	0	0	0	0	0	0	0	0	0	0	0	0	0	0	0	0	0	0	0	0	0	0	0	0	0	0	0	0	0
5	76	Brazil	0	0	0	0	0	0	0	0	0	0	0	0	0	0	0	0	0	0	0	0	0	0	0	0	0	0	0	0.016	0.0209	0.0258	0.0307	0.0356	0.0405	0.0454	0.0503	0.0552	0.0601	0.065	0.0985	0.132	0.1655	0.199	0.2325	0.266	0.2995	0.333	0.3665
4	84	Belize	0	0	0	0	0	0	0	0	0	0	0	0	0	0	0	0	0	0	0	0	0	0	0	0	0	0	0	0	0	0	0	0	0	0	0	0	0	0	0	0	0	0	0	0	0	0	0
18	86	British Indian Ocean Territory	0	0	0	0	0	0	0	0	0	0	0	0	0	0	0	0	0	0	0	0	0	0	0	0	0	0	0	0	0	0	0	0	0	0	0	0	0	0	0	0	0	0	0	0	0	0	0
24	90	Solomon Islands	0	0	0	0	0	0	0	0	0	0	0	0	0	0	0	0	0	0	0	0	0	0	0	0	0	0	0	0	0	0	0	0	0	0	0	0	0	0	0	0	0	0	0	0	0	0	0
4	92	Br.Virgin Is.	0	0	0	0	0	0	0	0	0	0	0	0	0	0	0	0	0	0	0	0	0	0	0	0	0	0	0	0	0	0	0	0	0	0	0	0	0	0	0	0	0	0	0	0	0	0	0
21	96	Brunei Dar El Salaam	0	0	0	0	0	0	0	0	0	0	0	0	0	0	0	0	0	0	0	0	0	0	0	0	0	0	0	0	0	0	0	0	0	0	0	0	0	0	0	0	0	0	0	0	0	0	0
12	100	Bulgaria	0	0	0	0	0	0	0	0	0	0	0	0	0	0	0	0	0	0	0	0	0	0	0	0	0	0	0	1.67622	1.87274	2.06926	2.26578	2.4623	2.65882	2.85534	3.05186	3.24838	3.44489	3.64141	6.27727	8.91313	11.549	14.1848	16.8207	19.4566	22.0924	24.7283	27.3641
21	104	Myanmar	0	0	0	0	0	0	0	0	0	1.30593	2.53125	2.78417	3.03708	3.28999	3.5429	3.79581	4.04872	4.30163	4.55455	4.80747	5.0604	6.32539	7.59036	7.33726	8.72871	10.1202	11.3851	12.65	14.545	16.44	18.335	20.23	22.125	24.02	25.915	27.81	29.705	31.6	54.39	77.18	99.97	122.76	145.55	168.34	191.13	213.92	236.71
9	108	Burundi	0	0	0	0	0	0	0	0	0	0	0	0	0	0	0	0	0	0	0	0	0	0	0	0	0	0	0	0	0	0	0	0	0	0	0	0	0	0	0	0	0	0	0	0	0	0	0
14	112	Belarus	0	0	0	0	0	0	0	0	0	0	0	0	0	0	0	0	0	0	0	0	0	0	0	0	0	0	0	0.129269	0.159994	0.190719	0.221445	0.25217	0.282896	0.313621	0.344346	0.375072	0.405797	0.436522	0.879908	1.32329	1.76668	2.21007	2.65345	3.09684	3.54022	3.98361	4.42699
21	116	Cambodia	0	0	0	0	0	0	0	0	0	0	0	0	0	0	0	0	0	0	0	0	0	0	0	0	0	0	0	0.590868	0.739498	0.888129	1.03676	1.18539	1.33402	1.48265	1.63128	1.77991	1.92854	2.07717	3.12556	4.17394	5.22233	6.27072	7.3191	8.36749	9.41588	10.4643	11.5126
8	120	Cameroon	0	0	0	0	0	0	0	0	0	0	0	0	0	0	0	0	0	0	0	0	0	0	0	0	0	0	0	0	0	0	0	0	0	0	0	0	0	0	0	0	0	0	0	0	0	0	0
1	124	Canada	0	0	0	0	0	0	0	0	0	0	0	0	0	0	0	0	0	0	0	0	0	0	0	0	0	0	0	0	0	0	0	0	0	0	0	0	0	0	3.24	6.48	9.72	12.96	16.2	19.44	22.68	25.92	29.16
8	132	Cape Verde	0	0	0	0	0	0	0	0	0	0	0	0	0	0	0	0	0	0	0	0	0	0	0	0	0	0	0	0	0	0	0	0	0	0	0	0	0	0	0	0	0	0	0	0	0	0	0
4	136	Cayman Islands	0	0	0	0	0	0	0	0	0	0	0	0	0	0	0	0	0	0	0	0	0	0	0	0	0	0	0	0	0	0	0	0	0	0	0	0	0	0	0	0	0	0	0	0	0	0	0
8	140	Central African Rep.	0	0	0	0	0	0	0	0	0	0	0	0	0	0	0	0	0	0	0	0	0	0	0	0	0	0	0	0	0	0	0	0	0	0	0	0	0	0	0	0	0	0	0	0	0	0	0
18	144	Sri Lanka	0	0	0	0	0	0	0	0	0	0	0.639969	0.735729	0.827993	0.916585	1.00131	1.08194	1.15823	1.22989	1.2966	1.35799	1.4136	1.54897	1.67257	1.57243	1.45644	1.5069	1.80336	2.05828	2.18538	2.31249	2.43959	2.56669	2.6938	2.8209	2.94801	3.07511	3.20221	3.32932	10.6953	18.0614	25.4274	32.7935	40.1595	47.5255	54.8916	62.2576	69.6236
8	148	Chad	0	0	0	0	0	0	0	0	0	0	0	0	0	0	0	0	0	0	0	0	0	0	0	0	0	0	0	0.247851	0.290442	0.333033	0.375624	0.418214	0.460805	0.503396	0.545987	0.588578	0.631168	0.673759	0.692929	0.712099	0.731269	0.750439	0.769608	0.788778	0.807948	0.827118	0.846288
6	152	Chile	0	0	0	0	0	0	0	0	0	0	24.7824	26.1599	27.5922	29.0773	30.6126	32.1939	33.8155	35.4695	37.1454	38.792	40.2456	42.9499	45.3197	47.3128	48.8747	49.9325	47.2357	44.338	50.5753	56.8127	63.05	69.2873	75.5247	81.762	87.9993	94.2366	100.474	106.711	140.84	174.969	209.098	243.226	277.355	311.484	345.612	379.741	413.87
20	156	China	0	0	0	0	0	0	34.1358	76.0435	152.087	304.174	910	921.25	932.5	943.75	955	966.25	977.5	988.75	1000	1160.71	1188.57	1216.43	1244.29	1272.14	1300	1663.09	1713.29	1763.5	1977.04	2190.58	2404.12	2617.66	2831.2	3044.74	3258.28	3471.82	3685.36	3898.9	4589.11	5279.32	5969.53	6659.74	7349.95	8040.16	8730.37	9420.58	10110.8
20	158	Taiwan	0	0	0	0	0	0	0	0	0	0	0	0	0	0	0	0	0	0	0	0	0	0	1.58165	1.72553	1.83917	1.91593	1.7686	7.95761	10.0028	12.0481	14.0933	16.1385	18.1838	20.229	22.2742	24.3195	26.3647	28.4099	37.9992	47.5884	57.1777	66.7669	76.3562	85.9454	95.5347	105.124	114.713
24	162	Christmas Isl.	0	0	0	0	0	0	0	0	0	0	0	0	0	0	0	0	0	0	0	0	0	0	0	0	0	0	0	0	0	0	0	0	0	0	0	0	0	0	0	0	0	0	0	0	0	0	0
24	166	Cocos (Keeling) Isl.	0	0	0	0	0	0	0	0	0	0	0	0	0	0	0	0	0	0	0	0	0	0	0	0	0	0	0	0	0	0	0	0	0	0	0	0	0	0	0	0	0	0	0	0	0	0	0
6	170	Colombia	0	0	0	0	0	0	0	0	0	0	0	0	0	0	0	0	0	1.95434	2.02829	2.16761	2.29106	2.50738	2.69508	2.84992	2.96616	6.54668	4.96457	3.8	4	4.2	4.4	4.6	4.8	5	5.2	5.4	5.6	5.8	6.22	6.64	7.06	7.48	7.9	8.32	8.74	9.16	9.58
9	174	Comoros	0	0	0	0	0	0	0	0	0	0	0	0	0	0	0	0	0	0	0	0	0	0	0	0	0	0	0	0	0	0	0	0	0	0	0	0	0	0	0	0	0	0	0	0	0	0	0
9	175	Mayotte	0	0	0	0	0	0	0	0	0	0	0	0	0	0	0	0	0	0	0	0	0	0	0	0	0	0	0	0	0	0	0	0	0	0	0	0	0	0	0	0	0	0	0	0	0	0	0
8	178	Congo	0	0	0	0	0	0	0	0	0	0	0	0	0	0	0	0	0	0	0	0	0	0	0	0	0	0	0	0	0	0	0	0	0	0	0	0	0	0	0	0	0	0	0	0	0	0	0
8	180	Zaire	0	0	0	0	0	0	0	0	0	0	0	0	0	0	0	0	0	0	0	0	0	0	0	0	0	0	0	0	0	0	0	0	0	0	0	0	0	0	0	0	0	0	0	0	0	0	0
24	184	Cook Islands	0	0	0	0	0	0	0	0	0	0	0	0	0	0	0	0	0	0	0	0	0	0	0	0	0	0	0	0	0	0	0	0	0	0	0	0	0	0	0	0	0	0	0	0	0	0	0
4	188	Costa Rica	0	0	0	0	0	0	0	0	0	0	0	0	0	0	0	0	0	0	0	0	0	0	0	0	0	0	0	0.195325	0.234459	0.273593	0.312727	0.351861	0.390995	0.430128	0.469262	0.508396	0.54753	0.586664	1.5384	2.49013	3.44186	4.3936	5.34533	6.29707	7.2488	8.20053	9.15227
12	191	Croatia	0	0	0	0	0	0	0	0	0	0	0	0	0	0	0	0	0	0	0	0	0	0	0	0	0	0	0	0.0940262	0.103674	0.113323	0.122971	0.132619	0.142267	0.151916	0.161564	0.171212	0.18086	0.190509	0.371458	0.552407	0.733356	0.914305	1.09525	1.2762	1.45715	1.6381	1.81905
4	192	Cuba	0	0	0	0	0	0	0	0	0	0	0	0	0	0	0	0	0	0	0	0	0	0	0	0	0	0	0	0.0970729	0.147039	0.197005	0.246972	0.296938	0.346904	0.39687	0.446837	0.496803	0.546769	0.596735	1.16063	1.72452	2.28841	2.8523	3.41619	3.98008	4.54397	5.10786	5.67175
12	196	Cyprus	0	0	0	0	0	0	0	0	0	0	0	0	0	0	0	0	0	0	0	0	0	0	0	0	0	0	0	1.15244	1.21043	1.26842	1.3264	1.38439	1.44238	1.50037	1.55836	1.61635	1.67434	1.73233	2.3245	2.91666	3.50883	4.10099	4.69316	5.28532	5.87749	6.46965	7.06182
12	203	Czech Rep.	0	0	0	0	0	0	0	0	0	0	0	0	0	0	0	0	0	0	0	0	0	0	0	0	0	0	0	0.178208	0.17613	0.174052	0.171975	0.169897	0.167819	0.165742	0.163664	0.161586	0.159509	0.157431	0.308902	0.460373	0.611844	0.763314	0.914785	1.06626	1.21773	1.3692	1.52067
8	204	Benin	0	0	0	0	0	0	0	0	0	0	0	0	0	0	0	0	0	0	0	0	0	0	0	0	0	0	0	0	0	0	0	0	0	0	0	0	0	0	0	0	0	0	0	0	0	0	0
11	208	Denmark	0	0	0	0	0	0	0	0	0	0	0	0	0	0	0	0	0	0	0	0	0	0	0	0	0	0	0	0.202444	0.217521	0.232599	0.247676	0.262754	0.277831	0.292909	0.307986	0.323063	0.338141	0.353218	0.77258	1.19194	1.6113	2.03066	2.45003	2.86939	3.28875	3.70811	4.12747
4	212	Dominica	0	0	0	0	0	0	0	0	0	0	0	0	0	0	0	0	0	0	0	0	0	0	0	0	0	0	0	0	0	0	0	0	0	0	0	0	0	0	0	0	0	0	0	0	0	0	0
4	214	Dominican Rep.	0	0	0	0	0	0	0	0	0	0	0	0	0	0	0	0	0	0	0	0	0	0	0	0	0	0	0	0.0371014	0.0410542	0.0450071	0.0489599	0.0529128	0.0568656	0.0608184	0.0647713	0.0687241	0.072677	0.0766298	0.165601	0.254572	0.343544	0.432515	0.521486	0.610458	0.699429	0.7884	0.877371
6	218	Ecuador	0	0	0	0	0	0	0	0	0	0	0	0	0	0	0	0	0	0	0	0	0	0	0	0	0	0	0	0.186021	0.185214	0.184406	0.183599	0.182791	0.181984	0.181176	0.180369	0.179561	0.178754	0.177946	0.189	0.200054	0.211107	0.222161	0.233215	0.244268	0.255322	0.266375	0.277429
4	222	El Salvador	0	0	0	0	0	0	0	0	0	0	0	0	0	0	0	0	0	0	0	0	0	0	0	0	0	0	0	0.0151965	0.0183941	0.0215916	0.0247892	0.0279868	0.0311844	0.034382	0.0375795	0.0407771	0.0439747	0.0471723	0.105743	0.164315	0.222886	0.281457	0.340028	0.398599	0.45717	0.515741	0.574312
8	226	Eq. Guinea	0	0	0	0	0	0	0	0	0	0	0	0	0	0	0	0	0	0	0	0	0	0	0	0	0	0	0	0	0	0	0	0	0	0	0	0	0	0	0	0	0	0	0	0	0	0	0
9	231	Ethiopia	0	0	0	0	0	0	0	0	0	0	0	0	0	0	0	0	0	1.87104	2.2871	2.28645	2.28579	2.28514	2.28448	2.28382	2.28316	2.28251	2.28185	2.28119	2.53853	2.79588	3.05322	3.31056	3.56791	3.82525	4.0826	4.33994	4.59728	4.85463	6.36916	7.8837	9.39824	10.9128	12.4273	13.9419	15.4564	16.9709	18.4855
9	232	Eritrea	0	0	0	0	0	0	0	0	0	0	0	0	0	0	0	0	0	0	0	0	0	0	0	0	0	0	0	0.239053	0.276266	0.313479	0.350693	0.387906	0.425119	0.462333	0.499546	0.536759	0.573973	0.611186	0.643791	0.676397	0.709002	0.741607	0.774213	0.806818	0.839423	0.872029	0.904634
12	233	Estonia	0	0	0	0	0	0	0	0	0	0	0	0	0	0	0	0	0	0	0	0	0	0	0	0	0	0	0	0	0	0	0	0	0	0	0	0	0	0	0	0	0	0	0	0	0	0	0
11	234	Faeroe Islands	0	0	0	0	0	0	0	0	0	0	0	0	0	0	0	0	0	0	0	0	0	0	0	0	0	0	0	0	0	0	0	0	0	0	0	0	0	0	0	0	0	0	0	0	0	0	0
6	238	Falkland Is.	0	0	0	0	0	0	0	0	0	0	0	0	0	0	0	0	0	0	0	0	0	0	0	0	0	0	0	0	0	0	0	0	0	0	0	0	0	0	0	0	0	0	0	0	0	0	0
24	242	Fiji	0	0	0	0	0	0	0	0	0	0	0	0	0	0	0	0	0	0	0	0	0	0	0	0	0	0	0	0	0	0	0	0	0	0	0	0	0	0	0	0	0	0	0	0	0	0	0
11	246	Finland	0	0	0	0	0	0	0	0	0	0	0	0	0	0	0	0	0	0	0	0	0	0	0	0	0	0	0	0	0	0	0	0	0	0	0	0	0	0	0	0	0	0	0	0	0	0	0
11	250	France	0	0	0	0	0	0	0	0	0	0	5.18507	5.9066	6.60355	5.77807	4.96702	4.65984	4.35586	4.53	4.69264	5.3017	5.87896	6.86149	9.07574	13.474	9.00082	11.8332	13.9654	15.7458	16.9294	18.113	19.2967	20.4803	21.6639	22.8475	24.0311	25.2148	26.3984	27.582	44.8238	62.0656	79.3074	96.5492	113.791	131.033	148.275	165.516	182.758
6	254	French Guiana	0	0	0	0	0	0	0	0	0	0	0	0	0	0	0	0	0	0	0	0	0	0	0	0	0	0	0	0	0	0	0	0	0	0	0	0	0	0	0	0	0	0	0	0	0	0	0
24	258	French Polynesia	0	0	0	0	0	0	0	0	0	0	0	0	0	0	0	0	0	0	0	0	0	0	0	0	0	0	0	0	0	0	0	0	0	0	0	0	0	0	0	0	0	0	0	0	0	0	0
9	262	Djibouti	0	0	0	0	0	0	0	0	0	0	0	0	0	0	0	0	0	0	0	0	0	0	0	0	0	0	0	0	0	0	0	0	0	0	0	0	0	0	0	0	0	0	0	0	0	0	0
8	266	Gabon	0	0	0	0	0	0	0	0	0	0	0	0	0	0	0	0	0	0	0	0	0	0	0	0	0	0	0	0	0	0	0	0	0	0	0	0	0	0	0	0	0	0	0	0	0	0	0
16	268	Georgia	0	0	0	0	0	0	0	0	0	0	0.974795	1.02637	1.07964	1.13445	1.19061	1.24784	1.30577	1.36394	1.42171	1.4575	1.48551	2.14826	2.74907	3.2819	2.48396	2.91138	3.21831	3.37379	3.7052	4.03661	4.36802	4.69943	5.03084	5.36225	5.69366	6.02507	6.35648	6.68789	9.09764	11.5074	13.9171	16.3269	18.7366	21.1464	23.5561	25.9659	28.3756
8	270	Gambia	0	0	0	0	0	0	0	0	0	0	0	0	0	0	0	0	0	0	0	0	0	0	0	0	0	0	0	1.06642	1.02697	0.987512	0.948058	0.908605	0.869151	0.829698	0.790244	0.75079	0.711337	0.671883	0.669841	0.6678	0.665758	0.663716	0.661674	0.659633	0.657591	0.655549	0.653508
17	275	Occupied Palestinian Territory	0	0	0	0	0	0	0	0	0	0	0	0	0	0	0	0	0	0	0	0	0	0	0	0	0	0	0	0.0747822	0.0957715	0.116761	0.13775	0.15874	0.179729	0.200718	0.221708	0.242697	0.263686	0.284676	0.351406	0.418136	0.484867	0.551597	0.618327	0.685058	0.751788	0.818518	0.885249
11	276	Germany	0	0	0	0	0	0	0	0	0	0	0	0	0	0	0	0	0	0	0	0	1.36701	2.18722	3.55423	4.37444	2.32392	3.00743	3.28083	3.00743	3.44713	3.88684	4.32654	4.76624	5.20595	5.64565	6.08536	6.52506	6.96476	7.40447	15.664	23.9236	32.1831	40.4427	48.7022	56.9618	65.2213	73.4809	81.7404
8	288	Ghana	0	0	0	0	0	0	0	0	0	0	0	0	0	0	0	0	0	0	0	0	0	0	0	0	0	0	0	1.26289	1.31771	1.37252	1.42734	1.48215	1.53697	1.59178	1.6466	1.70142	1.75623	1.81105	1.81977	1.8285	1.83722	1.84595	1.85468	1.8634	1.87213	1.88085	1.88958
11	292	Gibraltar	0	0	0	0	0	0	0	0	0	0	0	0	0	0	0	0	0	0	0	0	0	0	0	0	0	0	0	0	0	0	0	0	0	0	0	0	0	0	0	0	0	0	0	0	0	0	0
24	296	Kiribati	0	0	0	0	0	0	0	0	0	0	0	0	0	0	0	0	0	0	0	0	0	0	0	0	0	0	0	0	0	0	0	0	0	0	0	0	0	0	0	0	0	0	0	0	0	0	0
11	300	Greece	0	0	0	0	0	0	0	0	0	0	4.55491	4.55491	4.55491	3.98555	3.41618	2.61907	1.82196	1.93584	2.04971	2.16358	2.27746	2.45965	2.66462	2.84682	2.04971	2.27746	3.41618	3.41618	3.76011	4.10404	4.44797	4.7919	5.13582	5.47975	5.82368	6.16761	6.51153	6.85546	13.9782	21.101	28.2238	35.3465	42.4693	49.592	56.7148	63.8376	70.9603
25	304	Greenland	0	0	0	0	0	0	0	0	0	0	0	0	0	0	0	0	0	0	0	0	0	0	0	0	0	0	0	0	0	0	0	0	0	0	0	0	0	0	0	0	0	0	0	0	0	0	0
4	308	Grenada	0	0	0	0	0	0	0	0	0	0	0	0	0	0	0	0	0	0	0	0	0	0	0	0	0	0	0	0	0	0	0	0	0	0	0	0	0	0	0	0	0	0	0	0	0	0	0
4	312	Guadaloupe	0	0	0	0	0	0	0	0	0	0	0	0	0	0	0	0	0	0	0	0	0	0	0	0	0	0	0	0	0	0	0	0	0	0	0	0	0	0	0	0	0	0	0	0	0	0	0
24	316	Guam	0	0	0	0	0	0	0	0	0	0	0	0	0	0	0	0	0	0	0	0	0	0	0	0	0	0	0	0	0	0	0	0	0	0	0	0	0	0	0	0	0	0	0	0	0	0	0
4	320	Guatemala	0	0	0	0	0	0	0	0	0	0	0	0	0	0	0	0	0	0	1.52414	2.22286	2.87422	2.96392	3.03287	3.07789	3.09471	3.07727	2.15469	2.30431	2.35127	2.39823	2.44519	2.49215	2.53911	2.58606	2.63302	2.67998	2.72694	2.7739	4.20871	5.64352	7.07833	8.51314	9.94795	11.3828	12.8176	14.2524	15.6872
8	324	Guinea	0	0	0	0	0	0	0	0	0	0	0	0	0	0	0	0	0	0	0	0	0	1.88039	2.1376	2.42978	2.76165	3.13855	3.56656	4.05254	4.1328	4.21305	4.29331	4.37357	4.45383	4.53409	4.61435	4.6946	4.77486	4.85512	4.86961	4.8841	4.89858	4.91307	4.92756	4.94205	4.95654	4.97102	4.98551
6	328	Guyana	0	0	0	0	0	0	0	0	0	0	0	1.72814	2.12771	2.61779	3.21819	3.95284	4.85048	5.94548	7.27876	8.8987	10.8619	11.646	12.3571	13.9868	15.4615	16.7625	16.0793	16.9951	17.8836	18.7721	19.6606	20.5491	21.4375	22.326	23.2145	24.103	24.9915	25.88	26.125	26.37	26.615	26.86	27.105	27.35	27.595	27.84	28.085
4	332	Haiti	0	0	0	0	0	0	0	0	0	0	0	0	0	0	0	0	0	0	0	0	0	0	0	0	0	0	0	0.0401196	0.0874961	0.134873	0.182249	0.229626	0.277002	0.324379	0.371755	0.419132	0.466508	0.513885	0.963341	1.4128	1.86225	2.31171	2.76117	3.21062	3.66008	4.10954	4.55899
24	334	Heard and McDonald Isl.	0	0	0	0	0	0	0	0	0	0	0	0	0	0	0	0	0	0	0	0	0	0	0	0	0	0	0	0	0	0	0	0	0	0	0	0	0	0	0	0	0	0	0	0	0	0	0
11	336	Holy See	0	0	0	0	0	0	0	0	0	0	0	0	0	0	0	0	0	0	0	0	0	0	0	0	0	0	0	0	0	0	0	0	0	0	0	0	0	0	0	0	0	0	0	0	0	0	0
4	340	Honduras	0	0	0	0	0	0	0	0	0	0	0	0	0	0	0	0	0	0	0	0	0	0	0	0	0	0	0	0.278649	0.304847	0.331046	0.357245	0.383444	0.409643	0.435842	0.462041	0.48824	0.514439	0.540638	1.13792	1.73519	2.33247	2.92975	3.52703	4.1243	4.72158	5.31886	5.91614
20	0	Hong Kong	0	0	0	0	0	0	0	0	0	0	0	0	0	0	0	0	0	0	0	0	0	0	0	0	0	0	0	0	0	0	0	0	0	0	0	0	0	0	0	0	0	0	0	0	0	0	0
12	348	Hungary	0	0	0	0	0	0	0	0	0	0	0	0	0	0	0	0	0	0	0	0	0	0	0	0	0	0	0	0.197959	0.242145	0.286331	0.330517	0.374703	0.41889	0.463076	0.507262	0.551448	0.595634	0.639821	1.29065	1.94148	2.59231	3.24314	3.89397	4.5448	5.19563	5.84646	6.49728
11	352	Iceland	0	0	0	0	0	0	0	0	0	0	0	0	0	0	0	0	0	0	0	0	0	0	0	0	0	0	0	0	0	0	0	0	0	0	0	0	0	0	0	0	0	0	0	0	0	0	0
18	356	India	0	0	0	0	0	0	43.1229	77.2634	138.433	248.031	444.398	424.198	403.998	383.965	364.236	344.92	326.106	307.863	290.241	273.279	257.002	241.426	226.558	212.398	198.941	186.174	174.085	193.428	249.203	304.978	360.752	416.527	472.302	528.077	583.852	639.627	695.401	751.176	1859.45	2967.73	4076	5184.28	6292.56	7400.83	8509.11	9617.38	10725.7
22	360	Indonesia	0	0	0	0	0	0	0	0	0	0	0	1.88011	2.2571	2.69464	3.20155	3.78785	4.4649	5.24565	6.14477	7.17894	8.36707	10.3297	12.6252	15.3033	21.6796	27.7428	31.4768	36.082	43.1232	50.1644	57.2056	64.2468	71.288	78.3291	85.3703	92.4115	99.4527	106.494	195.845	285.195	374.546	463.896	553.247	642.598	731.948	821.299	910.649
17	364	Iran, Isl.Rep.of	0	0	0	0	1.35369	7.6624	40.2276	43.318	32.2963	31.7994	47.6992	48.638	49.4929	50.264	50.9511	51.5544	52.0738	46.2421	40.6368	41.5369	42.3363	43.4929	44.5237	30.2857	31.5052	32.5989	39.4902	36.082	41.8417	45.4516	49.0615	52.6713	56.2812	59.891	63.5009	67.1107	70.7206	74.3304	96.8974	119.464	142.031	164.598	187.165	209.732	232.299	254.866	277.433
17	368	Iraq	0	0	0	0.897369	1.52646	8.32615	74.9354	94.1408	94.4837	107.981	64.7888	66.3707	67.7947	66.0583	64.3218	59.7405	55.3171	94.0423	130.4	113.808	98.0052	82.9919	63.0373	44.2667	42.6881	41.1094	49.4135	25.8972	40.1346	42.3171	44.4995	46.682	48.8644	51.0469	53.2293	55.4118	57.5942	59.7767	82.7398	105.703	128.666	151.629	174.592	197.555	220.518	243.481	266.445
11	372	Ireland	0	0	0	0	0	0	0	0	0	0	0	0	0	0	0	0	0	0	0	0	0	0	0	0	0	0	0	0	0	0	0	0	0	0	0	0	0	0	0	0	0	0	0	0	0	0	0
17	376	Israel	0	0	0	0	0	0	0	0	0	0	0	0	0	0	0	0	0	0	0	0	0	0	0	0	0	0	0	1.50251	1.76148	2.02046	2.27943	2.5384	2.79738	3.05635	3.31532	3.5743	3.83327	4.09224	4.92125	5.75025	6.57926	7.40827	8.23727	9.06628	9.89528	10.7243	11.5533
11	380	Italy	0	0	0	0	0	0	0	0	0	0	0	4.73405	67.7851	60.9823	54.5817	35.4262	17.4863	25.0034	31.9583	34.6071	38.4805	46.2414	58.1305	82.1479	50.928	55.1809	78.1865	76.5705	84.2051	91.8397	99.4743	107.109	114.743	122.378	130.013	137.647	145.282	152.916	267.688	382.46	497.232	612.004	726.776	841.548	956.319	1071.09	1185.86
8	384	Cote d'Ivoire	0	0	0	0	0	0	0	0	0	0	0	0	0	0	0	0	0	0	0	0	0	0	0	0	0	0	0	0.144688	0.165443	0.186199	0.206954	0.227709	0.248465	0.26922	0.289976	0.310731	0.331486	0.352242	0.409018	0.465793	0.522569	0.579345	0.636121	0.692897	0.749673	0.806448	0.863224
4	388	Jamaica	0	0	0	0	0	0	0	0	0	0	0	0	0	0	0	0	0	0	0	0	0	0	0	0	0	0	0	0.153724	0.237976	0.322229	0.406482	0.490734	0.574987	0.659239	0.743492	0.827744	0.911997	0.99625	1.54462	2.093	2.64137	3.18975	3.73812	4.2865	4.83487	5.38325	5.93162
23	392	Japan	0	0	0	0	0	0	0	0	0	0	0	9.4816	13.0469	20.1321	26.9288	39.5754	51.6296	72.7663	88.9366	110.882	110.882	114.578	92.6187	101.48	123.503	154.908	201.012	292.057	319.963	347.87	375.777	403.683	431.59	459.497	487.403	515.31	543.217	571.123	768.386	965.649	1162.91	1360.17	1557.44	1754.7	1951.96	2149.22	2346.49
15	398	Kazakhstan	0	0	0	0	0	0	0	0	0	0	0	0	0	0	0	0	0	0	1.49083	1.86354	2.32942	2.91178	3.63972	4.54965	5.68707	7.10883	8.88604	11.1076	15.3721	19.6367	23.9012	28.1658	32.4304	36.6949	40.9595	45.224	49.4886	53.7532	124.069	194.385	264.701	335.017	405.333	475.65	545.966	616.282	686.598
17	400	Jordan	0	0	0	0	0	0	0	0	0	0	0	0	0	0	0	0	0	0	0	0	0	0	0	0	0	0	0	1.05019	1.11423	1.17826	1.24229	1.30632	1.37035	1.43438	1.49842	1.56245	1.62648	1.69051	2.43458	3.17865	3.92272	4.66679	5.41086	6.15493	6.899	7.64308	8.38715
9	404	Kenya	0	0	0	0	0	0	0	0	0	0	0	0	0	0	0	0	0	0	0	0	0	0	0	0	0	0	0	0.905203	1.07056	1.23592	1.40127	1.56663	1.73199	1.89734	2.0627	2.22806	2.39342	2.55877	2.7729	2.98702	3.20114	3.41527	3.62939	3.84351	4.05764	4.27176	4.48589
19	408	Dem.Rep.,Korea	0	0	0	0	0	0	0	0	0	0	0	1.80378	2.26669	2.84551	3.56807	4.46836	5.58766	6.97565	8.69154	9.50148	10.231	11.859	15.212	10.9205	12.1144	13.0467	15.1706	17.2881	21.5656	25.8431	30.1206	34.3981	38.6756	42.953	47.2305	51.508	55.7855	60.063	74.0878	88.1127	102.138	116.162	130.187	144.212	158.237	172.262	186.287
19	410	Rep. of Korea	0	0	0	0	0	0	0	0	0	0	0	0	1.7515	2.3611	3.17901	4.27441	5.73829	7.68968	10.2831	11.227	12.0704	13.9647	17.8709	12.7902	14.1306	15.1305	17.4403	19.5813	25.5343	31.4874	37.4405	43.3935	49.3466	55.2996	61.2527	67.2058	73.1588	79.1119	99.5617	120.011	140.461	160.911	181.361	201.811	222.261	242.71	263.16
17	414	Kuwait	0	0	0	0	0	0	0	0	0	0	0	0	0	0	0	0	0	0	0	0	0	0	0	0	0	0	0	0.143687	0.152521	0.161354	0.170188	0.179021	0.187855	0.196689	0.205522	0.214356	0.223189	0.232023	0.265121	0.298218	0.331316	0.364414	0.397511	0.430609	0.463707	0.496805	0.529902
15	417	Kyrgyzstan	0	0	0	0	0	0	0	0	0	0	0	11.2268	11.8695	12.5419	13.2444	13.9771	14.7397	15.5315	16.3516	16.7495	17.1087	18.0964	19.0098	19.8428	20.5882	21.2378	23.5473	25.6222	30.948	36.2737	41.5995	46.9253	52.2511	57.5768	62.9026	68.2284	73.5542	78.8799	104.371	129.862	155.352	180.843	206.334	231.825	257.315	282.806	308.297
21	418	Lao	0	0	0	0	0	0	0	0	0	0	0	0	0	0	0	0	0	0	0	0	0	0	0	0	0	0	0	0.249223	0.280177	0.311132	0.342086	0.37304	0.403995	0.434949	0.465904	0.496858	0.527813	0.558767	0.818767	1.07877	1.33877	1.59877	1.85877	2.11877	2.37877	2.63877	2.89877
17	422	Lebanon	0	0	0	0	0	0	0	0	0	0	5.19666	5.81622	6.50338	7.26394	6.342	5.52951	4.81361	4.18287	3.62718	3.31311	3.00552	3.05987	3.09253	3.09973	2.34615	2.3554	2.53688	1.95175	1.99733	2.0429	2.08847	2.13404	2.17961	2.22518	2.27075	2.31632	2.36189	2.40747	3.11855	3.82964	4.54072	5.25181	5.96289	6.67398	7.38506	8.09615	8.80723
10	426	Lesotho	0	0	0	0	0	0	0	0	0	0	0	0	0	0	0	0	0	0	0	0	0	0	0	0	0	0	0	0	0	0	0	0	0	0	0	0	0	0	0	0	0	0	0	0	0	0	0
12	428	Latvia	0	0	0	0	0	0	0	0	0	0	0	0	0	0	0	0	0	0	0	0	0	0	0	0	0	0	0	0	0	0	0	0	0	0	0	0	0	0	0	0	0	0	0	0	0	0	0
8	430	Liberia	0	0	0	0	0	0	0	0	0	0	0	0	0	0	0	0	0	0	0	0	0	0	0	0	0	0	0	0	0	0	0	0	0	0	0	0	0	0	0	0	0	0	0	0	0	0	0
7	434	Libyan A.J.	0	0	0	0	0	0	0	0	0	0	8.15209	9.27262	10.4157	9.47564	8.51303	9.03342	9.56284	10.1013	10.6488	10.9811	11.318	8.00158	4.61745	6.99384	9.41536	11.882	11.9948	12.1076	13.4086	14.7096	16.0105	17.3115	18.6125	19.9135	21.2145	22.5155	23.8165	25.1175	26.6057	28.094	29.5822	31.0705	32.5587	34.047	35.5352	37.0235	38.5117
11	438	Liechtenstein	0	0	0	0	0	0	0	0	0	0	0	0	0	0	0	0	0	0	0	0	0	0	0	0	0	0	0	0	0	0	0	0	0	0	0	0	0	0	0	0	0	0	0	0	0	0	0
12	440	Lithuania	0	0	0	0	0	0	0	0	0	0	0	0	0	0	0	0	0	0	0	0	0	0	0	0	0	0	0	0	0	0	0	0	0	0	0	0	0	0	0	0	0	0	0	0	0	0	0
11	442	Luxembourg	0	0	0	0	0	0	0	0	0	0	0	0	0	0	0	0	0	0	0	0	0	0	0	0	0	0	0	0	0	0	0	0	0	0	0	0	0	0	0	0	0	0	0	0	0	0	0
20	446	Macau	0	0	0	0	0	0	0	0	0	0	0	0	0	0	0	0	0	0	0	0	0	0	0	0	0	0	0	0	0	0	0	0	0	0	0	0	0	0	0	0	0	0	0	0	0	0	0
9	450	Madagascar	0	0	0	0	0	0	0	0	0	0	0	0	0	0	0	0	0	0	0	0	0	0	0	0	0	1.79617	2.17702	2.55641	2.97589	3.39537	3.81486	4.23434	4.65382	5.0733	5.49279	5.91227	6.33175	6.75123	7.07095	7.39068	7.7104	8.03012	8.34984	8.66956	8.98928	9.30901	9.62873
10	454	Malawi	0	0	0	0	0	0	0	0	0	0	0	0	0	0	0	0	0	0	0	0	0	0	0	0	0	0	0	0	0	0	0	0	0	0	0	0	0	0	0	0	0	0	0	0	0	0	0
21	458	Malaysia	0	0	0	0	0	0	0	0	0	0	0	0	0	0	0	0	0	0	0	0	0	1.93003	2.2463	2.56256	2.87883	3.19509	3.99385	4.7926	5.55469	6.31679	7.07889	7.84099	8.60309	9.36519	10.1273	10.8894	11.6515	12.4136	21.1722	29.9309	38.6895	47.4482	56.2068	64.9654	73.7241	82.4827	91.2414
18	462	Maldives	0	0	0	0	0	0	0	0	0	0	0	0	0	0	0	0	0	0	0	0	0	0	0	0	0	0	0	0	0	0	0	0	0	0	0	0	0	0	0	0	0	0	0	0	0	0	0
8	466	Mali	0	0	0	0	0	0	0	0	0	0	0	0	0	0	0	0	0	0	0	0	0	0	0	1.43764	1.58758	1.7086	1.98066	2.24891	2.58861	2.92831	3.26801	3.60771	3.94741	4.28711	4.62681	4.96651	5.3062	5.6459	5.83131	6.01672	6.20213	6.38754	6.57295	6.75836	6.94376	7.12917	7.31458
12	470	Malta	0	0	0	0	0	0	0	0	0	0	0	0	0	0	0	0	0	0	0	0	0	0	0	0	0	0	0	0.00960547	0.0105711	0.0115368	0.0125024	0.0134681	0.0144337	0.0153994	0.016365	0.0173307	0.0182963	0.019262	0.0358575	0.052453	0.0690486	0.0856441	0.10224	0.118835	0.135431	0.152026	0.168622
4	474	Martinique	0	0	0	0	0	0	0	0	0	0	0	0	0	0	0	0	0	0	0	0	0	0	0	0	0	0	0	0.0233649	0.036168	0.0489712	0.0617744	0.0745775	0.0873807	0.100184	0.112987	0.12579	0.138593	0.151397	0.222011	0.292625	0.363239	0.433852	0.504466	0.57508	0.645694	0.716308	0.786922
8	478	Mauritania	0	0	0	0	0	0	0	0	0	0	0	0	0	0	0	0	0	0	0	0	0	0	0	1.98916	2.15458	2.29936	2.66269	3.01998	3.46202	3.90407	4.34612	4.78817	5.23022	5.67226	6.11431	6.55636	6.99841	7.44045	7.69641	7.95236	8.20832	8.46427	8.72023	8.97618	9.23214	9.48809	9.74405
9	480	Mauritius	0	0	0	0	0	0	0	0	0	0	0	0	0	0	0	0	0	0	0	0	0	0	0	0	0	0	0	0.00322297	0	0	0	0	0	0	0	0	0	0.0555183	0	0	0	0	0	0	0	0	0
3	484	Mexico	0	0	0	0	0	0	0	0	0	0	53.3806	57.4568	61.8442	66.5667	71.6498	77.1213	83.0106	89.3497	96.173	113.065	130.604	151.033	172.24	194.248	217.081	240.764	9.82673	40.1076	48.1506	56.1935	64.2364	72.2793	80.3223	88.3652	96.4081	104.451	112.494	120.537	186.383	252.229	318.075	383.922	449.768	515.614	581.46	647.306	713.153
11	492	Monaco	0	0	0	0	0	0	0	0	0	0	0	0	0	0	0	0	0	0	0	0	0	0	0	0	0	0	0	0	0	0	0	0	0	0	0	0	0	0	0	0	0	0	0	0	0	0	0
20	496	Mongolia	0	0	0	0	0	0	0	0	0	0	0	0	0	0	0	0	0	0	0	0	0	0	0	0	0	0	0	0.119012	0.14548	0.171949	0.198418	0.224886	0.251355	0.277823	0.304292	0.330761	0.357229	0.383698	0.569172	0.754645	0.940119	1.12559	1.31107	1.49654	1.68201	1.86749	2.05296
14	498	Rep. of Moldova	0	0	0	0	0	0	0	0	0	0	0	0	0	0	0	0	0	0	0	0	0	0	0	0	0	0	0	0.675741	0.840172	1.0046	1.16903	1.33346	1.49789	1.66232	1.82675	1.99119	2.15562	2.32005	4.67807	7.0361	9.39413	11.7522	14.1102	16.4682	18.8262	21.1843	23.5423
4	500	Montserrat	0	0	0	0	0	0	0	0	0	0	0	0	0	0	0	0	0	0	0	0	0	0	0	0	0	0	0	0	0	0	0	0	0	0	0	0	0	0	0	0	0	0	0	0	0	0	0
7	504	Morocco	0	0	0	0	0	0	0	0	0	0	8.27881	8.62001	8.96911	9.32559	9.68884	10.0581	10.4325	10.811	11.1923	11.7891	12.3225	11.3051	10.3299	11.1104	9.56943	7.65768	11.0113	8.19465	9.86326	11.5319	13.2005	14.8691	16.5377	18.2063	19.8749	21.5435	23.2121	24.8807	29.71	34.5392	39.3685	44.1977	49.027	53.8562	58.6855	63.5147	68.344
10	508	Mozambique	0	0	0	0	0	0	0	0	0	0	0	0	0	0	0	0	0	0	0	0	1.70283	2.4854	3.26012	4.02687	4.78554	5.536	6.8839	8.21689	9.30623	10.3956	11.4849	12.5743	13.6636	14.7529	15.8423	16.9316	18.021	19.1103	20.5993	22.0883	23.5772	25.0662	26.5552	28.0441	29.5331	31.0221	32.511
17	512	Oman	0	0	0	0	0	0	0	0	0	0	0	0	0	0	0	0	0	0	0	0	0	0	0	0	0	0	0	0	0	0	0	0	0	0	0	0	0	0	2	4	6	8	10	12	14	16	18
10	516	Namibia	0	0	0	0	0	0	0	0	0	0	0	0	0	0	0	0	0	0	0	0	0	0	0	0	0	0	0	0.0892285	0.120431	0.151634	0.182837	0.21404	0.245243	0.276445	0.307648	0.338851	0.370054	0.401257	0.461131	0.521005	0.58088	0.640754	0.700628	0.760503	0.820377	0.880251	0.940126
24	520	Nauru	0	0	0	0	0	0	0	0	0	0	0	0	0	0	0	0	0	0	0	0	0	0	0	0	0	0	0	0	0	0	0	0	0	0	0	0	0	0	0	0	0	0	0	0	0	0	0
18	524	Nepal	0	0	0	0	0	0	0	0	0	0	0	0	0	0	0	0	0	0	0	0	0	0	0	0	0	0	0	0.692326	0.875069	1.05781	1.24056	1.4233	1.60604	1.78879	1.97153	2.15427	2.33701	2.51976	3.73778	4.95581	6.17383	7.39185	8.60988	9.8279	11.0459	12.264	13.482
11	528	Netherlands	0	0	0	0	0	0	0	0	0	0	0	0	0	0	0	0	0	0	0	0	0	0	0	0	0.424007	0.641112	0.858218	1.07532	1.10656	1.1378	1.16903	1.20027	1.2315	1.26274	1.29398	1.32521	1.35645	1.38768	2.69986	4.01203	5.3242	6.63637	7.94855	9.26072	10.5729	11.8851	13.1972
4	530	Neth.Antilles	0	0	0	0	0	0	0	0	0	0	0	0	0	0	0	0	0	0	0	0	0	0	0	0	0	0	0	0	0	0	0	0	0	0	0	0	0	0	0	0	0	0	0	0	0	0	0
4	533	Aruba	0	0	0	0	0	0	0	0	0	0	0	0	0	0	0	0	0	0	0	0	0	0	0	0	0	0	0	0	0	0	0	0	0	0	0	0	0	0	0	0	0	0	0	0	0	0	0
24	540	New Caledonia	0	0	0	0	0	0	0	0	0	0	0	0	0	0	0	0	0	0	0	0	0	0	0	0	0	0	0	0	0	0	0	0	0	0	0	0	0	0	0	0	0	0	0	0	0	0	0
24	548	Vanuatu	0	0	0	0	0	0	0	0	0	0	0	0	0	0	0	0	0	0	0	0	0	0	0	0	0	0	0	0	0	0	0	0	0	0	0	0	0	0	0	0	0	0	0	0	0	0	0
24	554	New Zealand	0	0	0	0	0	0	0	0	0	0	0	0	0	0	0	0	0	0	0	0	0	0	0	0	0	0	0	0	0	0	0	0	0	0	0	0	0	0	3.20825	6.4165	9.62475	12.833	16.0412	19.2495	22.4577	25.666	28.8742
4	558	Nicaragua	0	0	0	0	0	0	0	0	0	0	0	0	0	0	0	0	0	0	0	0	0	0	0	0	0	0	0	0.0676698	0.0794665	0.0912632	0.10306	0.114857	0.126653	0.13845	0.150247	0.162043	0.17384	0.185637	0.333709	0.481782	0.629855	0.777927	0.926	1.07407	1.22214	1.37022	1.51829
8	562	Niger	0	0	0	0	0	0	0	0	0	0	0	0	0	0	0	0	0	0	0	0	0	0	0	0	0	0	0	0.53864	0.617305	0.695971	0.774636	0.853302	0.931967	1.01063	1.0893	1.16796	1.24663	1.32529	1.37091	1.41653	1.46215	1.50777	1.55339	1.59901	1.64463	1.69025	1.73587
8	566	Nigeria	0	0	0	0	0	0	0	0	0	0	0	0	0	0	0	0	0	0	0	0	0	0	0	0	0	0	0	0.905871	0.995497	1.08512	1.17475	1.26437	1.354	1.44363	1.53325	1.62288	1.7125	1.80213	1.84589	1.88966	1.93343	1.97719	2.02096	2.06472	2.10849	2.15226	2.19602
24	570	Niue	0	0	0	0	0	0	0	0	0	0	0	0	0	0	0	0	0	0	0	0	0	0	0	0	0	0	0	0	0	0	0	0	0	0	0	0	0	0	0	0	0	0	0	0	0	0	0
24	574	Norfolk Isl.	0	0	0	0	0	0	0	0	0	0	0	0	0	0	0	0	0	0	0	0	0	0	0	0	0	0	0	0	0	0	0	0	0	0	0	0	0	0	0	0	0	0	0	0	0	0	0
11	578	Norway	0	0	0	0	0	0	0	0	0	0	0	0	0	0	0	0	0	0	0	0	0	0	0	0	0	0	0	0	0	0	0	0	0	0	0	0	0	0	0	0	0	0	0	0	0	0	0
24	580	Northern Mariana	0	0	0	0	0	0	0	0	0	0	0	0	0	0	0	0	0	0	0	0	0	0	0	0	0	0	0	0	0	0	0	0	0	0	0	0	0	0	0	0	0	0	0	0	0	0	0
24	583	Micr.,Fed.St.of	0	0	0	0	0	0	0	0	0	0	0	0	0	0	0	0	0	0	0	0	0	0	0	0	0	0	0	0	0	0	0	0	0	0	0	0	0	0	0	0	0	0	0	0	0	0	0
24	584	Marshall Islands	0	0	0	0	0	0	0	0	0	0	0	0	0	0	0	0	0	0	0	0	0	0	0	0	0	0	0	0	0	0	0	0	0	0	0	0	0	0	0	0	0	0	0	0	0	0	0
24	585	Palau	0	0	0	0	0	0	0	0	0	0	0	0	0	0	0	0	0	0	0	0	0	0	0	0	0	0	0	0	0	0	0	0	0	0	0	0	0	0	0	0	0	0	0	0	0	0	0
18	586	Pakistan	0	0	0	0	0	0	102.719	155.635	235.811	357.29	541.348	528.321	513.188	502.422	489.372	474.543	458.365	461.633	460.519	469.297	472.674	446.445	421.079	382.799	394.119	381.16	450.462	504.013	570.345	636.676	703.008	769.339	835.671	902.002	968.334	1034.67	1101	1167.33	1438.1	1708.87	1979.64	2250.41	2521.19	2791.96	3062.73	3333.5	3604.27
4	591	Panama	0	0	0	0	0	0	0	0	0	0	0	0	0	0	0	0	0	0	0	0	0	0	0	0	0	0	0	0.264565	0.299347	0.334129	0.368911	0.403694	0.438476	0.473258	0.50804	0.542822	0.577604	0.612386	1.11908	1.62577	2.13247	2.63916	3.14585	3.65255	4.15924	4.66593	5.17263
22	598	Papua New Guinea	0	0	0	0	0	0	0	0	0	0	0	0	0	0	0	0	0	0	0	0	0	0	0	0	0	0	0	0	0	0	0	0	0	0	0	0	0	0	0	0	0	0	0	0	0	0	0
6	600	Paraguay	0	0	0	0	0	0	0	0	0	0	0	0	0	0	0	0	0	0	0	0	0	0	0	0	0	0	0	0	0	0	0	0	0	0	0	0	0	0	0	0	0	0	0	0	0	0	0
6	604	Peru	0	0	0	0	0	0	0	0	0	34.89	36.5164	38.0606	39.6324	41.2252	42.8307	44.4387	46.0359	47.6058	49.1276	53.6489	57.6944	59.3521	60.5508	61.2132	61.2323	60.4517	18.1459	18.8652	18.7792	18.6932	18.6072	18.5212	18.4352	18.3491	18.2631	18.1771	18.0911	18.0051	27.4047	36.8042	46.2038	55.6034	65.003	74.4026	83.8021	93.2017	102.601
21	608	Philippines	0	0	0	0	0	0	0	0	0	0	0	0	0	0	0	0	0	0	0	0	0	0	0	0	0	1.9327	3.09203	4.83092	6.78284	8.73477	10.6867	12.6386	14.5906	16.5425	18.4944	20.4463	22.3983	24.3502	59.7836	95.217	130.65	166.084	201.517	236.95	272.384	307.817	343.251
24	612	Pitcairn	0	0	0	0	0	0	0	0	0	0	0	0	0	0	0	0	0	0	0	0	0	0	0	0	0	0	0	0	0	0	0	0	0	0	0	0	0	0	0	0	0	0	0	0	0	0	0
12	616	Poland	0	0	0	0	0	0	0	0	0	0	0	0	0	0	0	0	0	0	0	0	0	0	0	0	0	0	0	0.165675	0.185358	0.205042	0.224725	0.244408	0.264092	0.283775	0.303458	0.323142	0.342825	0.362508	0.797261	1.23201	1.66677	2.10152	2.53627	2.97102	3.40578	3.84053	4.27528
11	620	Portugal	0	0	0	0	0	0	0	0	0	0	3.91698	4.27918	4.20358	4.12516	4.04365	3.56283	3.09595	3.02153	2.94325	3.57572	4.15922	5.02335	5.80133	7.71581	5.28549	7.28549	10.823	10.1785	11.3251	12.4717	13.6183	14.7649	15.9115	17.058	18.2046	19.3512	20.4978	21.6444	39.48	57.3155	75.1511	92.9866	110.822	128.658	146.493	164.329	182.164
8	624	Guinea-Bissau	0	0	0	0	0	0	0	0	0	0	0	0	0	0	0	0	0	0	0	0	0	0	0	0	0	0	0	1.33456	1.39229	1.45001	1.50774	1.56546	1.62319	1.68091	1.73864	1.79636	1.85408	1.91181	1.92063	1.92945	1.93827	1.94709	1.9559	1.96472	1.97354	1.98236	1.99118
21	626	East Timor	0	0	0	0	0	0	0	0	0	0	0	0	0	0	0	0	0	0	0	0	0	0	0	0	0	0	0	0	0	0	0	0	0	0	0	0	0	0	0	0	0	0	0	0	0	0	0
4	630	Puerto Rico	0	0	0	0	0	0	0	0	0	0	0	0	0	0	0	0	0	0	0	0	0	0	0	0	0	0	0	0.0103226	0.0281727	0.0460229	0.0638731	0.0817233	0.0995735	0.117424	0.135274	0.153124	0.170974	0.188824	0.545185	0.901546	1.25791	1.61427	1.97063	2.32699	2.68335	3.03971	3.39607
17	634	Qatar	0	0	0	0	0	0	0	0	0	0	0	0	0	0	0	0	0	0	0	0	0	0	0	0	0	0	0	0	0	0	0	0	0	0	0	0	0	0	0	0	0	0	0	0	0	0	0
9	638	Reunion	0	0	0	0	0	0	0	0	0	0	0	0	0	0	0	0	0	0	0	0	0	0	0	0	0	0	0	0	0	0	0	0	0	0	0	0	0	0	0	0	0	0	0	0	0	0	0
12	642	Romania	0	0	0	0	0	0	0	0	0	0	0	0	0	0	0	0	0	0	0	0	0	0	0	0	0	0	0	0.0339061	0.0409454	0.0479846	0.0550239	0.0620631	0.0691024	0.0761417	0.0831809	0.0902202	0.0972594	0.104299	0.196713	0.289128	0.381543	0.473958	0.566373	0.658787	0.751202	0.843617	0.936032
16	643	Russian Fed.	0	0	0	0	0	0	0	0	0	0	0	0	0	0	0	0	0	0	0	0	0	0.585574	0.87836	0.909033	0.909033	1.17115	1.46393	1.65913	2.07741	2.4957	2.91399	3.33228	3.75056	4.16885	4.58714	5.00543	5.42372	5.842	8.73757	11.6331	14.5287	17.4243	20.3198	23.2154	26.111	29.0065	31.9021
9	646	Rwanda	0	0	0	0	0	0	0	0	0	0	0	0	0	0	0	0	0	0	0	0	0	0	0	0	0	0	0	0	0	0	0	0	0	0	0	0	0	0	0	0	0	0	0	0	0	0	0
8	654	St. Helena	0	0	0	0	0	0	0	0	0	0	0	0	0	0	0	0	0	0	0	0	0	0	0	0	0	0	0	0	0	0	0	0	0	0	0	0	0	0	0	0	0	0	0	0	0	0	0
4	659	St.Kitts & Nevis	0	0	0	0	0	0	0	0	0	0	0	0	0	0	0	0	0	0	0	0	0	0	0	0	0	0	0	0.0012346	0.00148765	0.0017407	0.00199375	0.0022468	0.00249985	0.0027529	0.00300595	0.003259	0.00351205	0.0037651	0.00518859	0.00661208	0.00803557	0.00945906	0.0108825	0.012306	0.0137295	0.015153	0.0165765
4	660	Anguilla	0	0	0	0	0	0	0	0	0	0	0	0	0	0	0	0	0	0	0	0	0	0	0	0	0	0	0	0	0	0	0	0	0	0	0	0	0	0	0	0	0	0	0	0	0	0	0
4	662	Saint Lucia	0	0	0	0	0	0	0	0	0	0	0	0	0	0	0	0	0	0	0	0	0	0	0	0	0	0	0	0	0	0	0	0	0	0	0	0	0	0	0	0	0	0	0	0	0	0	0
2	666	St.Pierre & Miq.	0	0	0	0	0	0	0	0	0	0	0	0	0	0	0	0	0	0	0	0	0	0	0	0	0	0	0	0	0	0	0	0	0	0	0	0	0	0	0	0	0	0	0	0	0	0	0
4	670	St.Vin. & Gren.	0	0	0	0	0	0	0	0	0	0	0	0	0	0	0	0	0	0	0	0	0	0	0	0	0	0	0	0	0	0	0	0	0	0	0	0	0	0	0	0	0	0	0	0	0	0	0
11	674	San Marino	0	0	0	0	0	0	0	0	0	0	0	0	0	0	0	0	0	0	0	0	0	0	0	0	0	0	0	0	0	0	0	0	0	0	0	0	0	0	0	0	0	0	0	0	0	0	0
8	678	Sao Tome & Pr.	0	0	0	0	0	0	0	0	0	0	0	0	0	0	0	0	0	0	0	0	0	0	0	0	0	0	0	0.214119	0.260177	0.306235	0.352293	0.398351	0.444409	0.490467	0.536525	0.582584	0.628642	0.6747	0.80723	0.93976	1.07229	1.20482	1.33735	1.46988	1.60241	1.73494	1.86747
17	682	Saudi Arabia	0	0	0	0	0	0	0	0	0	0	0	0	0	0	0	0	0	0	0	0	0	0	0	0	0	0	0	0.306056	0.434905	0.563755	0.692604	0.821453	0.950303	1.07915	1.208	1.33685	1.4657	1.59455	2.93509	4.27564	5.61618	6.95673	8.29727	9.63782	10.9784	12.3189	13.6595
8	686	Senegal	0	0	0	0	0	0	0	0	0	0	0	0	0	0	0	1.87818	2.35398	2.95024	3.69745	4.63383	5.80722	7.27759	9.12009	11.4288	14.3218	17.9467	22.4886	28.1795	28.7564	29.3333	29.9103	30.4872	31.0641	31.641	32.2179	32.7949	33.3718	33.9487	34.0538	34.159	34.2641	34.3692	34.4744	34.5795	34.6846	34.7897	34.8949
9	690	Seychelles	0	0	0	0	0	0	0	0	0	0	0	0	0	0	0	0	0	0	0	0	0	0	0	0	0	0	0	0	0	0	0	0	0	0	0	0	0	0	0	0	0	0	0	0	0	0	0
8	694	Sierra Leone	0	0	0	0	0	0	0	0	0	0	0	0	0	0	0	0	0	0	0	0	0	0	0	0	0	0	0	0.114581	0.12745	0.14032	0.153189	0.166058	0.178927	0.191796	0.204665	0.217535	0.230404	0.243273	0.253006	0.262738	0.272471	0.282204	0.291936	0.301669	0.311402	0.321134	0.330867
21	702	Singapore	0	0	0	0	0	0	0	0	0	0	0	0	0	0	0	0	0	0	0	0	0	0	0	0	0	0	0	0	0	0	0	0	0	0	0	0	0	0	0	0	0	0	0	0	0	0	0
12	703	Slovakia	0	0	0	0	0	0	0	0	0	0	0	0	0	0	0	0	0	0	0	0	0	0	0	0	0	0	0	0.00530491	0.00586848	0.00643204	0.0069956	0.00755917	0.00812273	0.00868629	0.00924986	0.00981342	0.010377	0.0109405	0.0187585	0.0265764	0.0343944	0.0422123	0.0500303	0.0578482	0.0656662	0.0734841	0.0813021
21	704	Viet Nam	0	0	0	0	0	0	0	0	0	0	0	0	0	0	0	0	0	0	0	0	1.91632	2.49009	3.06352	3.6367	4.20969	4.78255	5.97689	7.17094	9.74088	12.3108	14.8808	17.4507	20.0206	22.5906	25.1605	27.7304	30.3004	32.8703	59.5833	86.2963	113.009	139.722	166.435	193.148	219.861	246.574	273.287
12	705	Slovenia	0	0	0	0	0	0	0	0	0	0	0	0	0	0	0	0	0	0	0	0	0	0	0	0	0	0	0	0.0207543	0.0230041	0.0252539	0.0275037	0.0297535	0.0320033	0.0342531	0.0365029	0.0387528	0.0410026	0.0432524	0.0844491	0.125646	0.166843	0.208039	0.249236	0.290433	0.331629	0.372826	0.414023
9	706	Somalia	0	0	0	0	0	0	0	0	0	0	0	0	0	0	0	0	0	0	0	0	0	0	0	0	0	0	0	0.52352	0.795748	1.06798	1.3402	1.61243	1.88466	2.15688	2.42911	2.70134	2.97357	3.24579	4.38371	5.52163	6.65956	7.79748	8.9354	10.0733	11.2112	12.3492	13.4871
10	710	South Africa	0	0	0	0	0	0	0	0	0	0	0	0	0	0	0	0	0	0	0	0	0	0	0	0	0	0	1.79865	5.13899	6.1441	7.14921	8.15433	9.15944	10.1646	11.1697	12.1748	13.1799	14.185	15.1901	54.0711	92.9521	131.833	170.714	209.595	248.476	287.357	326.238	365.119
10	716	Zimbabwe	0	0	0	0	0	0	0	0	0	0	0	0	0	0	0	0	0	0	0	0	0	0	0	0	0	0	0	0.558882	0.64729	0.735698	0.824107	0.912515	1.00092	1.08933	1.17774	1.26615	1.35456	1.44296	1.66867	1.89437	2.12008	2.34578	2.57148	2.79719	3.02289	3.24859	3.4743
11	724	Spain	0	0	0	0	0	0	0	0	0	0	23.7957	25.2909	24.4995	23.6529	21.413	19.0711	20.0932	21.1322	22.187	23.2559	26.5495	32.9072	45.4748	33.7698	40.3814	53.3817	50.7357	57.7443	63.5044	69.2645	75.0245	80.7846	86.5447	92.3047	98.0648	103.825	109.585	115.345	196.542	277.738	358.935	440.132	521.329	602.525	683.722	764.919	846.116
7	732	Western Sahara	0	0	0	0	0	0	0	0	0	0	0	0	0	0	0	0	0	0	0	0	0	0	0	0	0	0	0	0	0	0	0	0	0	0	0	0	0	0	0	0	0	0	0	0	0	0	0
9	736	Sudan	0	0	0	0	0	0	0	0	0	0	12.1731	12.613	13.0686	13.5404	14.0289	14.5347	15.0585	15.6008	16.1623	17.45	18.7438	19.4174	20.0938	21.8222	23.5586	25.303	27.2666	29.2392	34.8791	40.519	46.1589	51.7988	57.4387	63.0786	68.7185	74.3585	79.9984	85.6383	97.0745	108.511	119.947	131.383	142.819	154.255	165.691	177.128	188.564
6	740	Suriname	0	0	0	0	0	0	0	0	0	0	0	0	0	0	0	0	0	0	0	0	0	0	0	0	0	0	0	0.0681632	0.0767247	0.0852863	0.0938478	0.102409	0.110971	0.119532	0.128094	0.136655	0.145217	0.153779	0.158401	0.163023	0.167645	0.172267	0.176889	0.181511	0.186134	0.190756	0.195378
11	744	Svalbard & Jan Mayen Isl.	0	0	0	0	0	0	0	0	0	0	0	0	0	0	0	0	0	0	0	0	0	0	0	0	0	0	0	0	0	0	0	0	0	0	0	0	0	0	0	0	0	0	0	0	0	0	0
10	748	Swaziland	0	0	0	0	0	0	0	0	0	0	0	0	0	0	0	0	0	0	0	0	0	0	0	0	0	0	0	0	0	0	0	0	0	0	0	0	0	0	0	0	0	0	0	0	0	0	0
11	752	Sweden	0	0	0	0	0	0	0	0	0	0	0	0	0	0	0	0	0	0	0	0	0	0	0	0	0	0	0	0	0	0	0	0	0	0	0	0	0	0	0	0	0	0	0	0	0	0	0
11	756	Switzerland	0	0	0	0	0	0	0	0	0	0	0	0	0	0	0	0	0	0	0	0	0	0	0	0	0	0	0	0.910586	0.987308	1.06403	1.14075	1.21747	1.2942	1.37092	1.44764	1.52436	1.60109	1.67781	3.16057	4.64334	6.1261	7.60887	9.09163	10.5744	12.0572	13.5399	15.0227
17	760	Syrian Arab Rep.	0	0	0	0	0	0.0046276	9.98321	11.2877	9.71037	11.6524	13.109	17.9277	24.5161	33.524	26.7394	21.3267	17.0087	13.5642	10.8167	19.8586	9.68251	10.295	10.9151	11.543	9.29524	10.0283	11.7852	11.9327	12.5246	13.1165	13.7085	14.3004	14.8923	15.4842	16.0761	16.668	17.2599	17.8518	22.1921	26.5324	30.8726	35.2129	39.5532	43.8935	48.2337	52.574	56.9143
15	762	Tajikistan	0	0	0	0	0	0	0	0	0	0	4.23534	4.46611	4.70568	4.95372	5.2097	5.47288	5.74223	6.01638	6.2935	6.43974	6.56019	6.65199	6.99122	7.27318	7.48942	7.62862	8.14004	8.47379	10.6517	12.8296	15.0075	17.1854	19.3633	21.5412	23.7191	25.897	28.0749	30.2528	40.464	50.6753	60.8866	71.0979	81.3091	91.5204	101.732	111.943	122.154
21	764	Thailand	0	0	0	0	0	0	0	0	0	0	0	0	0	0	0	0	0	0	0	0	0	0	0	0	0	0	0	0.854343	1.08787	1.3214	1.55493	1.78846	2.02199	2.25552	2.48905	2.72258	2.95611	3.18964	6.81457	10.4395	14.0644	17.6893	21.3143	24.9392	28.5641	32.189	35.814
8	768	Togo	0	0	0	0	0	0	0	0	0	0	0	0	0	0	0	0	0	0	0	0	0	0	0	0	0	0	0	0.441654	0.477534	0.513414	0.549295	0.585175	0.621055	0.656936	0.692816	0.728696	0.764577	0.800457	0.806411	0.812365	0.81832	0.824274	0.830228	0.836183	0.842137	0.848091	0.854046
24	772	Tokelau	0	0	0	0	0	0	0	0	0	0	0	0	0	0	0	0	0	0	0	0	0	0	0	0	0	0	0	0	0	0	0	0	0	0	0	0	0	0	0	0	0	0	0	0	0	0	0
24	776	Tonga	0	0	0	0	0	0	0	0	0	0	0	0	0	0	0	0	0	0	0	0	0	0	0	0	0	0	0	0	0	0	0	0	0	0	0	0	0	0	0	0	0	0	0	0	0	0	0
4	780	Trin. & Tobago	0	0	0	0	0	0	0	0	0	0	0	0	0	0	0	0	0	0	0	0	0	0	0	0	0	0	0	0	0	0	0	0	0	0	0	0	0	0	0	0	0	0	0	0	0	0	0
17	784	U.Arab Emirates	0	0	0	0	0	0	0	0	0	0	0	0	0	0	0	0	0	0	0	0	0	0	0	0	0	0	0	1.49815	1.51168	1.52522	1.53876	1.5523	1.56584	1.57938	1.59291	1.60645	1.61999	1.63353	1.98766	2.3418	2.69593	3.05006	3.4042	3.75833	4.11246	4.4666	4.82073
7	788	Tunisia	0	0	0	0	0	0	0	0	0	0	18.7833	20.9578	23.0937	21.7559	20.4374	19.1382	17.8582	17.7041	20.8405	21.201	21.5519	20.2912	21.1665	20.9737	16.6248	16.4706	20.3956	16.1623	17.879	19.5958	21.3126	23.0294	24.7461	26.4629	28.1797	29.8964	31.6132	33.33	39.1637	44.9974	50.8311	56.6649	62.4986	68.3323	74.166	79.9998	85.8335
13	792	Turkey	0	0	0	0.551559	1.65468	10.4796	17.1715	23.3702	44.8996	63.9477	79.2738	85.0946	90.7581	83.4187	76.1728	69.0259	61.9843	67.2898	72.3709	78.6861	84.6691	60.755	70.1736	78.9648	61.9147	64.6254	79.5626	80.3993	86.6317	92.8641	99.0965	105.329	111.561	117.794	124.026	130.259	136.491	142.723	167.95	193.176	218.402	243.629	268.855	294.081	319.308	344.534	369.76
15	795	Turkmenistan	0	0	0	0	0	0	0	0	0	0	11.1176	11.8394	12.6067	13.4221	14.2885	15.209	16.1865	17.2246	18.3266	18.7651	19.1934	20.3958	21.5756	22.7323	24.0843	26.0598	30.1493	33.0938	38.4715	43.8493	49.227	54.6048	59.9825	65.3603	70.738	76.1158	81.4935	86.8713	109.155	131.439	153.723	176.007	198.291	220.575	242.858	265.142	287.426
4	796	Turks & Caicos	0	0	0	0	0	0	0	0	0	0	0	0	0	0	0	0	0	0	0	0	0	0	0	0	0	0	0	0	0	0	0	0	0	0	0	0	0	0	0	0	0	0	0	0	0	0	0
24	798	Tuvalu	0	0	0	0	0	0	0	0	0	0	0	0	0	0	0	0	0	0	0	0	0	0	0	0	0	0	0	0	0	0	0	0	0	0	0	0	0	0	0	0	0	0	0	0	0	0	0
9	800	Uganda	0	0	0	0	0	0	0	0	0	0	0	0	0	0	0	0	0	0	0	0	0	0	0	0	0	0	0	0	0	0	0	0	0	0	0	0	0	0	0	0	0	0	0	0	0	0	0
14	804	Ukraine	0	0	0	0	0	0	0	0	0	0	0	0	0	0	0	0	0	0	0	0	0	0	0	0	0	0	0	0.00580998	0.00669529	0.00758061	0.00846592	0.00935123	0.0102365	0.0111219	0.0120072	0.0128925	0.0137778	0.0146631	0.0352716	0.0558801	0.0764886	0.0970971	0.117706	0.138314	0.158923	0.179531	0.20014
12	807	TFYR Macedonia	0	0	0	0	0	0	0	0	0	0	0	0	0	0	0	0	0	0	0	0	0	0	0	0	0	0	0	0	0	0	0	0	0	0	0	0	0	0	0	0	0	0	0	0	0	0	0
7	818	Egypt	0	0	0	0	34.5664	155.117	700	800	850	900	1000	1060	1120	1180	1240	1300	1360	1420	1480	1540	1600	1660	1720	1780	1840	1900	2045.22	2190.43	2204.96	2219.48	2234	2248.52	2263.04	2277.57	2292.09	2306.61	2321.13	2335.65	2350.17	2364.7	2379.22	2393.74	2408.26	2422.78	2437.3	2451.83	2466.35
11	826	United Kingdom	0	0	0	0	0	0	0	0	0	0	0	0	0	0	0	0	0	0	0	0	0	0	0	0	0	0	0	0	0	0	0	0	0	0	0	0	0	0	0	0	0	0	0	0	0	0	0
10	834	U.R. Tanzania	0	0	0	0	0	0	0	0	0	0	0	0	0	0	0	0	0	0	0	0	0	0	0	0	0	0	0	0	0	0	0	0	0	0	0	0	0	0	0	0	0	0	0	0	0	0	0
2	840	United States	0	0	0	0	0	0	0	0	0	0	0	0	0	0	0	0	0	0	4.1434	4.67726	5.21395	5.65514	6.29808	6.86328	7.67456	8.43669	3.98899	5.057	6.21987	7.38274	8.54561	9.70849	10.8714	12.0342	13.1971	14.36	15.5228	16.6857	330.211	643.736	957.261	1270.79	1584.31	1897.84	2211.36	2524.89	2838.41
4	850	U.S. Virgin Is.	0	0	0	0	0	0	0	0	0	0	0	0	0	0	0	0	0	0	0	0	0	0	0	0	0	0	0	0	0	0	0	0	0	0	0	0	0	0	0	0	0	0	0	0	0	0	0
8	854	Burkina Faso	0	0	0	0	0	0	0	0	0	0	0	0	0	0	0	0	0	0	0	0	0	0	0	0	0	0	0	0.257762	0.278576	0.299389	0.320202	0.341016	0.361829	0.382642	0.403455	0.424269	0.445082	0.465895	0.469306	0.472716	0.476127	0.479537	0.482948	0.486358	0.489769	0.493179	0.49659
6	858	Uruguay	0	0	0	0	0	0	0	0	0	0	0	0	0	0	0	0	0	0	0	0	0	0	0	0	0	0	0	0	0	0	0	0	0	0	0	0	0	0	0	0	0	0	0	0	0	0	0
15	860	Uzbekistan	0	0	0	0	0	0	0	0	0	0	28.5662	30.7079	33.0091	35.4816	38.1381	40.9923	44.0588	47.3532	50.8925	53.2011	55.5219	60.0203	64.5436	69.0915	73.6639	78.8865	90.4156	102.008	118.529	135.051	151.572	168.093	184.614	201.136	217.657	234.178	250.7	267.221	335.798	404.375	472.952	541.53	610.107	678.684	747.261	815.838	884.415
6	862	Venezuela	0	0	0	0	0	0	0	0	0	0	0	0	0	0	0	0	0	0	0	0	0	0	0	0	0	0	0	0.139441	0.140545	0.141649	0.142753	0.143857	0.144961	0.146065	0.147169	0.148273	0.149377	0.15048	0.171407	0.192334	0.213261	0.234188	0.255115	0.276042	0.296968	0.317895	0.338822
24	876	Wallis & Futuna	0	0	0	0	0	0	0	0	0	0	0	0	0	0	0	0	0	0	0	0	0	0	0	0	0	0	0	0	0	0	0	0	0	0	0	0	0	0	0	0	0	0	0	0	0	0	0
24	882	Samoa, Western	0	0	0	0	0	0	0	0	0	0	0	0	0	0	0	0	0	0	0	0	0	0	0	0	0	0	0	0	0	0	0	0	0	0	0	0	0	0	0	0	0	0	0	0	0	0	0
17	887	Yemen	0	0	0	0	0	0	0	0	0	0	0	0	0	0	0	0	0	0	0	0	0	0	0	0	0	0	0	17.7702	19.0806	20.391	21.7014	23.0117	24.3221	25.6325	26.9429	28.2533	29.5636	30.874	35.9997	41.1253	46.251	51.3767	56.5024	61.628	66.7537	71.8794	77.0051
12	891	Union of Serbia and Montenegro	0	0	0	0	0	0	0	0	0	0	0	0	0	0	0	0	0	0	0	0	0	0	0	0	0	0	0	0	0	0	0	0	0	0	0	0	0	0	0	0	0	0	0	0	0	0	0
10	894	Zambia	0	0	0	0	0	0	0	0	0	0	0	0	0	0	0	0	0	0	0	0	0	0	0	0	0	0	0	0	0	0	0	0	0	0	0	0	0	0	0	0	0	0	0	0	0	0	0
		HYDE 3.2	0	0	0	1.44893	39.1012	181.59	1022.3	1281.06	1557.72	2061.07	3410.04	3509.76	3646.15	3698.23	3730.94	3758.72	3791.38	3937.28	4081.84	4361.37	4469.47	4551.23	4654.24	4739.22	4828.85	5355.23	5504.48	5966.08	6505.28	7030.28	7555.28	8080.28	8605.29	9130.29	9655.29	10180.3	10705.3	11230.4	14994.6	18758.4	22522.2	26285.9	30049.7	33813.5	37577.2	41341	45104.8
		Siebert et al (2008)																												4507										10524
		Siebert et al (2014)
		Framji et al (1981)
		Michael, A. (2008), Irrigation, theory and practice. Top 20 countries only																																						8000
		Li, et al (2009)																												1200										8000
		Irrigation Museum (http://www.irrigationmuseum.org/item1.aspx?id=30)																																						7904
		Siebert et al (2015)
	1	Li, et al (2009) : Eufraat & Tigris area (read from figure 2.12) => 50,000 km2 in AD 220								30	35	41	48	49	50	51	52	53	54	55	56	57	58	59	60	61	62	63	64	65
		Total Turkey, Syria, Iraq	is niet te rijmen met Global totals !! Moet dat niet 50,000 ha zijn ??							172.117	181.39	215.381	204.871	218.031	232.562	233.265	218.185	201.647	186.384	221.138	254.224	253.889	234.693	197.535	188.65	165.06	145.403	148.362	180.252	155.667	182.682	195.491	208.301	221.11	233.92	246.729	259.539	272.348	285.158	297.967	375.149	452.33	529.511	606.692	683.874	761.055	838.236	915.418	992.599
		Iran								5.67	6.615	7.749	9.072	9.261	9.45	9.639	9.828	10.017	10.206	10.395	10.584	10.773	10.962	11.151	11.34	11.529	11.718	11.907	12.096	12.285
		Iraq								13.92	16.24	19.024	22.272	22.736	23.2	23.664	24.128	24.592	25.056	25.52	25.984	26.448	26.912	27.376	27.84	28.304	28.768	29.232	29.696	30.16
		Syria								3.3	3.85	4.51	5.28	5.39	5.5	5.61	5.72	5.83	5.94	6.05	6.16	6.27	6.38	6.49	6.6	6.71	6.82	6.93	7.04	7.15
		Saudi Arabia								0.57	0.665	0.779	0.912	0.931	0.95	0.969	0.988	1.007	1.026	1.045	1.064	1.083	1.102	1.121	1.14	1.159	1.178	1.197	1.216	1.235
		Turkey								6.54	7.63	8.938	10.464	10.682	10.9	11.118	11.336	11.554	11.772	11.99	12.208	12.426	12.644	12.862	13.08	13.298	13.516	13.734	13.952	14.17
		Jordan								0.09	0.105	0.123	0.144	0.147	0.15	0.153	0.156	0.159	0.162	0.165	0.168	0.171	0.174	0.177	0.18	0.183	0.186	0.189	0.192	0.195
		Egypt					34.5664	155.117	700	2133.91	2133.91	2133.91	2133.91	2133.91	2133.91	2133.91	2133.91	2133.91	2133.91	2133.91	2133.91	2133.91	2133.91	2133.91	2133.91	2133.91	2133.91	2133.91	2133.91	2133.91	http://books.google.nl/books?hl=en&lr=&id=2tMk0RDsqk8C&oi=fnd&pg=PA13&dq=Framji+et+al+1981&ots=Xh1n3fLZ1n&sig=cqz4Pl7I7QTNhCf1qr_Pp-enZKU#v=onepage&q&f=false
										30	35	41	48	49	50	51	52	53	54	55	56	57	58	59	60	61	62	63	64	65
Total actual irrigated land estimate, in 1000 ha			-10000	-9000	-8000	-7000	-6000	-5000	-4000	-3000	-2000	-1000	0	100	200	300	400	500	600	700	800	900	1000	1100	1200	1300	1400	1500	1600	1700	1710	1720	1730	1740	1750	1760	1770	1780	1790	1800	1810	1820	1830	1840	1850	1860	1870	1880	1890
	1	Canada	0	0	0	0	0	0	0	0	0	0	0	0	0	0	0	0	0	0	0	0	0	0	0	0	0	0	0	0	0	0	0	0	0	0	0	0	0	0	3.24	6.48	9.72	12.96	16.2	19.44	22.68	25.92	29.16
	2	USA	0	0	0	0	0	0	0	0	0	0	0	0	0	0	0	0	0	0	4.1434	4.67726	5.21395	5.65514	6.29808	6.86328	7.67456	8.43669	3.98899	5.057	6.21987	7.38274	8.54561	9.70849	10.8714	12.0342	13.1971	14.36	15.5228	16.6857	330.211	643.736	957.261	1270.79	1584.31	1897.84	2211.36	2524.89	2838.41
	3	Mexico	0	0	0	0	0	0	0	0	0	0	53.3806	57.4568	61.8442	66.5667	71.6498	77.1213	83.0106	89.3497	96.173	113.065	130.604	151.033	172.24	194.248	217.081	240.764	9.82673	40.1076	48.1506	56.1935	64.2364	72.2793	80.3223	88.3652	96.4081	104.451	112.494	120.537	186.383	252.229	318.075	383.922	449.768	515.614	581.46	647.306	713.153
	4	Rest Central America	0	0	0	0	0	0	0	0	0	0	0	0	0	0	0	0	0	0	1.52414	2.22286	2.87422	2.96392	3.03287	3.07789	3.09471	3.07727	2.15469	3.48865	3.86718	4.2457	4.62422	5.00275	5.38127	5.75979	6.13832	6.51684	6.89536	7.27389	13.0501	18.8264	24.6026	30.3789	36.1551	41.9314	47.7076	53.4839	59.2601
	5	Brazil	0	0	0	0	0	0	0	0	0	0	0	0	0	0	0	0	0	0	0	0	0	0	0	0	0	0	0	0.016	0.0209	0.0258	0.0307	0.0356	0.0405	0.0454	0.0503	0.0552	0.0601	0.065	0.0985	0.132	0.1655	0.199	0.2325	0.266	0.2995	0.333	0.3665
	6	Rest South America	0	0	0	0	0	0	0	0	0	34.89	61.2988	65.9487	69.3523	72.9203	76.6615	80.5854	84.7018	90.9751	95.5801	105.5	113.371	119.059	123.898	128.763	132.421	138.135	91.5012	90.7537	103.248	115.742	128.236	140.73	153.224	165.718	178.212	190.707	203.201	215.695	329.343	442.991	556.64	670.288	783.936	897.585	1011.23	1124.88	1238.53
	7	Northern Africa	0	0	0	0	34.5664	155.117	700	800	850	900	1074.42	1136.37	1198.37	1254.88	1311.43	1369.54	1427.73	1487.1	1549.82	1612.67	1675.31	1728.07	1782.99	1842.15	1895.07	1955.18	2116.35	2247.68	2271.12	2294.57	2318.01	2341.46	2364.91	2388.35	2411.8	2435.24	2458.69	2482.14	2520.72	2559.31	2597.89	2636.48	2675.06	2713.65	2752.23	2790.82	2829.4
	8	Western Africa	0	0	0	0	0	0	0	0	0	0	0	0	0	0	0	1.87818	2.35398	2.95024	3.69745	4.63383	5.80722	9.15798	11.2577	17.2854	20.8256	25.0932	30.6985	44.03	45.8892	47.7485	49.6078	51.467	53.3263	55.1856	57.0449	58.9041	60.7634	62.6227	63.5161	64.4096	65.303	66.1964	67.0899	67.9833	68.8768	69.7702	70.6637
	9	Eastern Africa	0	0	0	0	0	0	0	0	0	0	12.1731	12.613	13.0686	13.5404	14.0289	14.5347	15.0585	17.4718	18.4494	19.7365	21.0296	21.7025	22.3782	24.106	25.8418	29.3817	31.7255	35.7445	42.5361	49.3276	56.1191	62.9107	69.7022	76.4938	83.2853	90.0768	96.8684	103.66	118.315	132.97	147.625	162.28	176.935	191.59	206.245	220.901	235.556
	10	Southern Africa	0	0	0	0	0	0	0	0	0	0	0	0	0	0	0	0	0	0	0	0	1.70283	2.4854	3.26012	4.02687	5.61631	6.48682	9.69424	15.0767	17.7244	20.372	23.0197	25.6674	28.315	30.9627	33.6103	36.258	38.9056	41.5533	83.3086	125.064	166.819	208.574	250.33	292.085	333.84	375.596	417.351
	11	Western Europe	0	0	0	0	0	0	0	0	0	0	37.4526	44.7657	107.647	98.5239	88.4216	65.3391	46.8532	55.623	63.8309	68.9039	78.7126	95.6803	124.701	144.329	110.393	133.607	161.266	169.194	185.903	202.612	219.321	236.029	252.738	269.447	286.156	302.864	319.573	336.282	585.216	835.048	1084.88	1334.71	1584.54	1834.38	2084.21	2334.04	2583.87
	12	Central Europe	0	0	0	0	0	0	0	0	0	0	0	0	0	0	0	0	0	0	0	0	0	0	0	0	0	0	0	4.0662	4.45302	4.83984	5.22666	5.61348	6.0003	6.38711	6.77393	7.16075	7.54757	7.93439	13.6492	19.364	25.0787	30.7935	36.5083	42.2231	47.9379	53.6526	59.3674
	13	Turkey	0	0	0	0.551559	1.65468	10.4796	17.1715	23.3702	44.8996	63.9477	79.2738	85.0946	90.7581	83.4187	76.1728	69.0259	61.9843	67.2898	72.3709	78.6861	84.6691	60.755	70.1736	78.9648	61.9147	64.6254	79.5626	80.3993	86.6317	92.8641	99.0965	105.329	111.561	117.794	124.026	130.259	136.491	142.723	167.95	193.176	218.402	243.629	268.855	294.081	319.308	344.534	369.76
	14	Ukraine +	0	0	0	0	0	0	0	0	0	0	0	0	0	0	0	0	0	0	0	0	0	0	0	0	0	0	0	0.681551	0.846867	1.01218	1.1775	1.34281	1.50813	1.67345	1.83876	2.00408	2.16939	2.33471	4.71335	7.09198	9.47062	11.8493	14.2279	16.6065	18.9852	21.3638	23.7424
	15	Asia-Stan	0	0	0	0	0	0	0	0	0	0	43.9192	58.2403	62.1909	66.3993	70.8808	75.6513	80.7272	86.1257	93.355	97.0189	100.714	108.076	115.76	123.489	131.513	140.922	161.138	180.305	213.973	247.64	281.307	314.974	348.642	382.309	415.976	449.644	483.311	516.978	713.857	910.736	1107.62	1304.49	1501.37	1698.25	1895.13	2092.01	2288.89
	16	Russia +	0	0	0	0	0	0	0	0	0	0	10.5651	11.3356	12.1614	13.0463	13.9943	15.0096	16.097	17.2611	18.507	19.57	20.6309	31.5382	42.1477	52.4835	42.1402	52.6571	63.1394	73.7939	81.6497	89.5054	97.3611	105.217	113.073	120.928	128.784	136.64	144.496	152.351	209.167	265.982	322.797	379.613	436.428	493.244	550.059	606.874	663.69
	17	Middle East	0	0	0	0.897369	2.88015	15.9932	125.146	148.746	136.49	151.433	130.794	138.753	148.307	157.11	148.354	138.151	129.213	158.031	185.48	178.516	153.03	139.84	121.569	89.1951	85.8347	86.0921	103.226	98.3587	120.821	129.078	137.336	145.593	153.851	162.108	170.366	178.623	186.88	195.138	256.323	317.507	378.692	439.877	501.061	562.246	623.431	684.615	745.8
	18	India +	0	0	0	0	0	0	145.842	232.899	374.244	605.321	994.237	961.98	927.588	896.752	863.929	829.732	794.68	779.369	760.296	751.86	738.703	697.303	657.439	602.338	600.345	574.904	635.591	709.472	835.959	962.446	1088.93	1215.42	1341.91	1468.39	1594.88	1721.37	1847.85	1974.34	3418.03	4861.73	6305.42	7749.11	9192.8	10636.5	12080.2	13523.9	14967.6
	19	Korea	0	0	0	0	0	0	0	0	0	0	0	1.80378	4.01819	5.2066	6.74707	8.74277	11.326	14.6653	18.9746	20.7284	22.3013	25.8237	33.0829	23.7106	26.2451	28.1773	32.611	36.8694	47.1	57.3305	67.5611	77.7916	88.0221	98.2527	108.483	118.714	128.944	139.175	173.65	208.124	242.599	277.073	311.548	346.023	380.497	414.972	449.447
	20	China +	0	0	0	0	0	0	34.1358	76.0435	152.087	304.174	910	921.25	932.5	943.75	955	966.25	977.5	988.75	1000	1160.71	1188.57	1216.43	1245.87	1273.87	1301.84	1665	1715.06	1771.58	1987.19	2202.8	2418.41	2634.02	2849.64	3065.25	3280.86	3496.47	3712.08	3927.69	4627.68	5327.66	6027.65	6727.63	7427.62	8127.6	8827.59	9527.57	10227.6
	21	Southeastern Asia	0	0	0	0	0	0	0	0	0	1.30593	2.53125	2.78417	3.03708	3.28999	3.5429	3.79581	4.04872	4.30163	4.55455	4.80747	6.97672	10.7455	12.9002	13.5365	15.8172	20.0305	24.4478	31.1389	38.731	46.323	53.9151	61.5072	69.0993	76.6914	84.2834	91.8755	99.4676	107.06	205.688	304.316	402.945	501.573	600.201	698.829	797.458	896.086	994.714
	22	Indonesia +	0	0	0	0	0	0	0	0	0	0	0	1.88011	2.2571	2.69464	3.20155	3.78785	4.4649	5.24565	6.14477	7.17894	8.36707	10.3297	12.6252	15.3033	21.6796	27.7428	31.4768	36.082	43.1232	50.1644	57.2056	64.2468	71.288	78.3291	85.3703	92.4115	99.4527	106.494	195.845	285.195	374.546	463.896	553.247	642.598	731.948	821.299	910.649
	23	Japan	0	0	0	0	0	0	0	0	0	0	0	9.4816	13.0469	20.1321	26.9288	39.5754	51.6296	72.7663	88.9366	110.882	110.882	114.578	92.6187	101.48	123.503	154.908	201.012	292.057	319.963	347.87	375.777	403.683	431.59	459.497	487.403	515.31	543.217	571.123	768.386	965.649	1162.91	1360.17	1557.44	1754.7	1951.96	2149.22	2346.49
	24	Oceania	0	0	0	0	0	0	0	0	0	0	0	0	0	0	0	0	0	0	0	0	0	0	0	0	0	0	0	0	0	0	0	0	0	0	0	0	0	0	5.39837	9.34123	13.2841	17.227	21.1698	25.1127	29.0556	32.9984	36.9413
	25	Greenland	0	0	0	0	0	0	0	0	0	0	0	0	0	0	0	0	0	0	0	0	0	0	0	0	0	0	0	0	0	0	0	0	0	0	0	0	0	0	0	0	0	0	0	0	0	0	0
	26	Antarctica	0	0	0	0	0	0	0	0	0	0	0	0	0	0	0	0	0	0	0	0	0	0	0	0	0	0	0	0	0	0	0	0	0	0	0	0	0	0	0	0	0	0	0	0	0	0	0
			-10000	-9000	-8000	-7000	-6000	-5000	-4000	-3000	-2000	-1000	0	100	200	300	400	500	600	700	800	900	1000	1100	1200	1300	1400	1500	1600	1700	1710	1720	1730	1740	1750	1760	1770	1780	1790	1800	1810	1820	1830	1840	1850	1860	1870	1880	1890
		HYDE	0	0	0	0.00144893	0.0391012	0.18159	1.0223	1.28106	1.55772	2.06107	3.41004	3.50976	3.64615	3.69823	3.73094	3.75872	3.79138	3.93728	4.08184	4.36137	4.46947	4.55123	4.65424	4.73922	4.82885	5.35523	5.50448	5.96594	6.50512	7.03009	7.55506	8.08003	8.605	9.12997	9.65495	10.1799	10.7049	11.2299	14.9937	18.7571	22.5204	26.2837	30.047	33.8104	37.5737	41.337	45.1003
		Greyhank and Siebert (2007)																												5.13463										10.6494
		Africa	0	0	0	0	34.5664	155.117	700	800	850	900	1086.59	1148.99	1211.44	1268.42	1325.46	1385.95	1445.14	1507.53	1571.97	1637.04	1703.84	1761.42	1819.89	1887.57	1947.35	2016.14	2188.47	2342.53	2377.27	2412.02	2446.76	2481.51	2516.25	2550.99	2585.74	2620.48	2655.23	2689.97	2785.86	2881.75	2977.64	3073.53	3169.42	3265.31	3361.2	3457.09	3552.97
		Americas	0	0	0	0	0	0	0	0	0	34.89	114.679	123.405	131.196	139.487	148.311	157.707	167.712	180.325	197.421	225.465	252.064	278.711	305.469	332.952	360.271	390.412	107.472	139.423	161.506	183.59	205.673	227.756	249.84	271.923	294.006	316.09	338.173	360.256	862.326	1364.4	1866.46	2368.53	2870.6	3372.67	3874.74	4376.81	4878.88
		Europe	0	0	0	0	0	0	0	0	0	0	48.0177	56.1013	119.808	111.57	102.416	80.3487	62.9502	72.8841	82.3379	88.474	99.3435	127.219	166.849	196.812	152.534	186.264	224.405	247.736	272.853	297.969	323.086	348.202	373.319	398.436	423.552	448.669	473.786	498.902	812.745	1127.49	1442.23	1756.97	2071.71	2386.45	2701.19	3015.93	3330.67
		Asia	0	0	0	1.44893	4.53483	26.4728	322.296	481.059	707.721	1126.18	2160.76	2181.27	2183.7	2178.75	2154.76	2134.71	2115.57	2176.54	2230.11	2410.39	2414.21	2383.88	2362.04	2321.89	2368.69	2762.41	2984.13	3236.26	3693.49	4136.52	4579.54	5022.57	5465.6	5908.62	6351.65	6794.67	7237.7	7680.73	10527.4	13374.1	16220.8	19067.5	21914.1	24760.8	27607.5	30454.2	33300.9
Total actual irrigated land estimate, in Mha			-10000	-9000	-8000	-7000	-6000	-5000	-4000	-3000	-2000	-1000	0	100	200	300	400	500	600	700	800	900	1000	1100	1200	1300	1400	1500	1600	1700	1710	1720	1730	1740	1750	1760	1770	1780	1790	1800	1810	1820	1830	1840	1850	1860	1870	1880	1890
	1	Canada	0	0	0	0	0	0	0	0	0	0	0	0	0	0	0	0	0	0	0	0	0	0	0	0	0	0	0	0	0	0	0	0	0	0	0	0	0	0	0.00324	0.00648	0.00972	0.01296	0.0162	0.01944	0.02268	0.02592	0.02916
	2	USA	0	0	0	0	0	0	0	0	0	0	0	0	0	0	0	0	0	0	0.0041434	0.00467726	0.00521395	0.00565514	0.00629808	0.00686328	0.00767456	0.00843669	0.00398899	0.005057	0.00621987	0.00738274	0.00854561	0.00970849	0.0108714	0.0120342	0.0131971	0.01436	0.0155228	0.0166857	0.330211	0.643736	0.957261	1.27079	1.58431	1.89784	2.21136	2.52489	2.83841
	3	Mexico	0	0	0	0	0	0	0	0	0	0	0.0533806	0.0574568	0.0618442	0.0665667	0.0716498	0.0771213	0.0830106	0.0893497	0.096173	0.113065	0.130604	0.151033	0.17224	0.194248	0.217081	0.240764	0.00982673	0.0401076	0.0481506	0.0561935	0.0642364	0.0722793	0.0803223	0.0883652	0.0964081	0.104451	0.112494	0.120537	0.186383	0.252229	0.318075	0.383922	0.449768	0.515614	0.58146	0.647306	0.713153
	4	Rest Central America	0	0	0	0	0	0	0	0	0	0	0	0	0	0	0	0	0	0	0.00152414	0.00222286	0.00287422	0.00296392	0.00303287	0.00307789	0.00309471	0.00307727	0.00215469	0.00348865	0.00386718	0.0042457	0.00462422	0.00500275	0.00538127	0.00575979	0.00613832	0.00651684	0.00689536	0.00727389	0.0130501	0.0188264	0.0246026	0.0303789	0.0361551	0.0419314	0.0477076	0.0534839	0.0592601
	5	Brazil	0	0	0	0	0	0	0	0	0	0	0	0	0	0	0	0	0	0	0	0	0	0	0	0	0	0	0	1.6e-05	2.09e-05	2.58e-05	3.07e-05	3.56e-05	4.05e-05	4.54e-05	5.03e-05	5.52e-05	6.01e-05	6.5e-05	9.85e-05	0.000132	0.0001655	0.000199	0.0002325	0.000266	0.0002995	0.000333	0.0003665
	6	Rest South America	0	0	0	0	0	0	0	0	0	0.03489	0.0612988	0.0659487	0.0693523	0.0729203	0.0766615	0.0805854	0.0847018	0.0909751	0.0955801	0.1055	0.113371	0.119059	0.123898	0.128763	0.132421	0.138135	0.0915012	0.0907537	0.103248	0.115742	0.128236	0.14073	0.153224	0.165718	0.178212	0.190707	0.203201	0.215695	0.329343	0.442991	0.55664	0.670288	0.783936	0.897585	1.01123	1.12488	1.23853
	7	Northern Africa	0	0	0	0	0.0345664	0.155117	0.7	0.8	0.85	0.9	1.07442	1.13637	1.19837	1.25488	1.31143	1.36954	1.42773	1.4871	1.54982	1.61267	1.67531	1.72807	1.78299	1.84215	1.89507	1.95518	2.11635	2.24768	2.27112	2.29457	2.31801	2.34146	2.36491	2.38835	2.4118	2.43524	2.45869	2.48214	2.52072	2.55931	2.59789	2.63648	2.67506	2.71365	2.75223	2.79082	2.8294
	8	Western Africa	0	0	0	0	0	0	0	0	0	0	0	0	0	0	0	0.00187818	0.00235398	0.00295024	0.00369745	0.00463383	0.00580722	0.00915798	0.0112577	0.0172854	0.0208256	0.0250932	0.0306985	0.04403	0.0458892	0.0477485	0.0496078	0.051467	0.0533263	0.0551856	0.0570449	0.0589041	0.0607634	0.0626227	0.0635161	0.0644096	0.065303	0.0661964	0.0670899	0.0679833	0.0688768	0.0697702	0.0706637
	9	Eastern Africa	0	0	0	0	0	0	0	0	0	0	0.0121731	0.012613	0.0130686	0.0135404	0.0140289	0.0145347	0.0150585	0.0174718	0.0184494	0.0197365	0.0210296	0.0217025	0.0223782	0.024106	0.0258418	0.0293817	0.0317255	0.0357445	0.0425361	0.0493276	0.0561191	0.0629107	0.0697022	0.0764938	0.0832853	0.0900768	0.0968684	0.10366	0.118315	0.13297	0.147625	0.16228	0.176935	0.19159	0.206245	0.220901	0.235556
	10	Southern Africa	0	0	0	0	0	0	0	0	0	0	0	0	0	0	0	0	0	0	0	0	0.00170283	0.0024854	0.00326012	0.00402687	0.00561631	0.00648682	0.00969424	0.0150767	0.0177244	0.020372	0.0230197	0.0256674	0.028315	0.0309627	0.0336103	0.036258	0.0389056	0.0415533	0.0833086	0.125064	0.166819	0.208574	0.25033	0.292085	0.33384	0.375596	0.417351
	11	Western Europe	0	0	0	0	0	0	0	0	0	0	0.0374526	0.0447657	0.107647	0.0985239	0.0884216	0.0653391	0.0468532	0.055623	0.0638309	0.0689039	0.0787126	0.0956803	0.124701	0.144329	0.110393	0.133607	0.161266	0.169194	0.185903	0.202612	0.219321	0.236029	0.252738	0.269447	0.286156	0.302864	0.319573	0.336282	0.585216	0.835048	1.08488	1.33471	1.58454	1.83438	2.08421	2.33404	2.58387
	12	Central Europe	0	0	0	0	0	0	0	0	0	0	0	0	0	0	0	0	0	0	0	0	0	0	0	0	0	0	0	0.0040662	0.00445302	0.00483984	0.00522666	0.00561348	0.0060003	0.00638711	0.00677393	0.00716075	0.00754757	0.00793439	0.0136492	0.019364	0.0250787	0.0307935	0.0365083	0.0422231	0.0479379	0.0536526	0.0593674
	13	Turkey	0	0	0	0.000551559	0.00165468	0.0104796	0.0171715	0.0233702	0.0448996	0.0639477	0.0792738	0.0850946	0.0907581	0.0834187	0.0761728	0.0690259	0.0619843	0.0672898	0.0723709	0.0786861	0.0846691	0.060755	0.0701736	0.0789648	0.0619147	0.0646254	0.0795626	0.0803993	0.0866317	0.0928641	0.0990965	0.105329	0.111561	0.117794	0.124026	0.130259	0.136491	0.142723	0.16795	0.193176	0.218402	0.243629	0.268855	0.294081	0.319308	0.344534	0.36976
	14	Ukraine +	0	0	0	0	0	0	0	0	0	0	0	0	0	0	0	0	0	0	0	0	0	0	0	0	0	0	0	0.000681551	0.000846867	0.00101218	0.0011775	0.00134281	0.00150813	0.00167345	0.00183876	0.00200408	0.00216939	0.00233471	0.00471335	0.00709198	0.00947062	0.0118493	0.0142279	0.0166065	0.0189852	0.0213638	0.0237424
	15	Asia-Stan	0	0	0	0	0	0	0	0	0	0	0.0439192	0.0582403	0.0621909	0.0663993	0.0708808	0.0756513	0.0807272	0.0861257	0.093355	0.0970189	0.100714	0.108076	0.11576	0.123489	0.131513	0.140922	0.161138	0.180305	0.213973	0.24764	0.281307	0.314974	0.348642	0.382309	0.415976	0.449644	0.483311	0.516978	0.713857	0.910736	1.10762	1.30449	1.50137	1.69825	1.89513	2.09201	2.28889
	16	Russia +	0	0	0	0	0	0	0	0	0	0	0.0105651	0.0113356	0.0121614	0.0130463	0.0139943	0.0150096	0.016097	0.0172611	0.018507	0.01957	0.0206309	0.0315382	0.0421477	0.0524835	0.0421402	0.0526571	0.0631394	0.0737939	0.0816497	0.0895054	0.0973611	0.105217	0.113073	0.120928	0.128784	0.13664	0.144496	0.152351	0.209167	0.265982	0.322797	0.379613	0.436428	0.493244	0.550059	0.606874	0.66369
	17	Middle East	0	0	0	0.000897369	0.00288015	0.0159932	0.125146	0.148746	0.13649	0.151433	0.130794	0.138753	0.148307	0.15711	0.148354	0.138151	0.129213	0.158031	0.18548	0.178516	0.15303	0.13984	0.121569	0.0891951	0.0858347	0.0860921	0.103226	0.0983587	0.120821	0.129078	0.137336	0.145593	0.153851	0.162108	0.170366	0.178623	0.18688	0.195138	0.256323	0.317507	0.378692	0.439877	0.501061	0.562246	0.623431	0.684615	0.7458
	18	India +	0	0	0	0	0	0	0.145842	0.232899	0.374244	0.605321	0.994237	0.96198	0.927588	0.896752	0.863929	0.829732	0.79468	0.779369	0.760296	0.75186	0.738703	0.697303	0.657439	0.602338	0.600345	0.574904	0.635591	0.709472	0.835959	0.962446	1.08893	1.21542	1.34191	1.46839	1.59488	1.72137	1.84785	1.97434	3.41803	4.86173	6.30542	7.74911	9.1928	10.6365	12.0802	13.5239	14.9676
	19	Korea	0	0	0	0	0	0	0	0	0	0	0	0.00180378	0.00401819	0.0052066	0.00674707	0.00874277	0.011326	0.0146653	0.0189746	0.0207284	0.0223013	0.0258237	0.0330829	0.0237106	0.0262451	0.0281773	0.032611	0.0368694	0.0471	0.0573305	0.0675611	0.0777916	0.0880221	0.0982527	0.108483	0.118714	0.128944	0.139175	0.17365	0.208124	0.242599	0.277073	0.311548	0.346023	0.380497	0.414972	0.449447
	20	China +	0	0	0	0	0	0	0.0341358	0.0760435	0.152087	0.304174	0.91	0.92125	0.9325	0.94375	0.955	0.96625	0.9775	0.98875	1	1.16071	1.18857	1.21643	1.24587	1.27387	1.30184	1.665	1.71506	1.77158	1.98719	2.2028	2.41841	2.63402	2.84964	3.06525	3.28086	3.49647	3.71208	3.92769	4.62768	5.32766	6.02765	6.72763	7.42762	8.1276	8.82759	9.52757	10.2276
	21	Southeastern Asia	0	0	0	0	0	0	0	0	0	0.00130593	0.00253125	0.00278417	0.00303708	0.00328999	0.0035429	0.00379581	0.00404872	0.00430163	0.00455455	0.00480747	0.00697672	0.0107455	0.0129002	0.0135365	0.0158172	0.0200305	0.0244478	0.0311389	0.038731	0.046323	0.0539151	0.0615072	0.0690993	0.0766914	0.0842834	0.0918755	0.0994676	0.10706	0.205688	0.304316	0.402945	0.501573	0.600201	0.698829	0.797458	0.896086	0.994714
	22	Indonesia +	0	0	0	0	0	0	0	0	0	0	0	0.00188011	0.0022571	0.00269464	0.00320155	0.00378785	0.0044649	0.00524565	0.00614477	0.00717894	0.00836707	0.0103297	0.0126252	0.0153033	0.0216796	0.0277428	0.0314768	0.036082	0.0431232	0.0501644	0.0572056	0.0642468	0.071288	0.0783291	0.0853703	0.0924115	0.0994527	0.106494	0.195845	0.285195	0.374546	0.463896	0.553247	0.642598	0.731948	0.821299	0.910649
	23	Japan	0	0	0	0	0	0	0	0	0	0	0	0.0094816	0.0130469	0.0201321	0.0269288	0.0395754	0.0516296	0.0727663	0.0889366	0.110882	0.110882	0.114578	0.0926187	0.10148	0.123503	0.154908	0.201012	0.292057	0.319963	0.34787	0.375777	0.403683	0.43159	0.459497	0.487403	0.51531	0.543217	0.571123	0.768386	0.965649	1.16291	1.36017	1.55744	1.7547	1.95196	2.14922	2.34649
	24	Oceania	0	0	0	0	0	0	0	0	0	0	0	0	0	0	0	0	0	0	0	0	0	0	0	0	0	0	0	0	0	0	0	0	0	0	0	0	0	0	0.00539837	0.00934123	0.0132841	0.017227	0.0211698	0.0251127	0.0290556	0.0329984	0.0369413
	25	Greenland	0	0	0	0	0	0	0	0	0	0	0	0	0	0	0	0	0	0	0	0	0	0	0	0	0	0	0	0	0	0	0	0	0	0	0	0	0	0	0	0	0	0	0	0	0	0	0
	26	Antarctica	0	0	0	0	0	0	0	0	0	0	0	0	0	0	0	0	0	0	0	0	0	0	0	0	0	0	0	0	0	0	0	0	0	0	0	0	0	0	0	0	0	0	0	0	0	0	0
		total	0	0	0	0.00144893	0.0391012	0.18159	1.0223	1.28106	1.55772	2.06107	3.41004	3.50976	3.64615	3.69823	3.73094	3.75872	3.79138	3.93728	4.08184	4.36137	4.46947	4.55123	4.65424	4.73922	4.82885	5.35523	5.50448	5.96594	6.50512	7.03009	7.55506	8.08003	8.605	9.12997	9.65495	10.1799	10.7049	11.2299	14.9937	18.7571	22.5204	26.2837	30.047	33.8104	37.5737	41.337	45.1003
			-10000	-9000	-8000	-7000	-6000	-5000	-4000	-3000	-2000	-1000	0	100	200	300	400	500	600	700	800	900	1000	1100	1200	1300	1400	1500	1600	1700	1710	1720	1730	1740	1750	1760	1770	1780	1790	1800	1810	1820	1830	1840	1850	1860	1870	1880	1890
	1	North America	0	0	0	0	0	0	0	0	0	0	0	0	0	0	0	0	0	0	0.0041434	0.00467726	0.00521395	0.00565514	0.00629808	0.00686328	0.00767456	0.00843669	0.00398899	0.005057	0.00621987	0.00738274	0.00854561	0.00970849	0.0108714	0.0120342	0.0131971	0.01436	0.0155228	0.0166857	0.333451	0.650216	0.966981	1.28375	1.60051	1.91728	2.23404	2.55081	2.86757
	2	Europe	0	0	0	0	0	0	0	0	0	0	0.0374526	0.0447657	0.107647	0.0985239	0.0884216	0.0653391	0.0468532	0.055623	0.0638309	0.0689039	0.0787126	0.0956803	0.124701	0.144329	0.110393	0.133607	0.161266	0.17326	0.190356	0.207452	0.224547	0.241643	0.258738	0.275834	0.29293	0.310025	0.327121	0.344216	0.598865	0.854412	1.10996	1.36551	1.62105	1.8766	2.13215	2.38769	2.64324
	3	USSR	0	0	0	0	0	0	0	0	0	0	0.0544842	0.0695759	0.0743524	0.0794456	0.0848751	0.0906609	0.0968242	0.103387	0.111862	0.116589	0.121344	0.139615	0.157908	0.175973	0.173653	0.193579	0.224278	0.254781	0.296469	0.338157	0.379846	0.421534	0.463222	0.504911	0.546599	0.588288	0.629976	0.671664	0.927737	1.18381	1.43988	1.69596	1.95203	2.2081	2.46418	2.72025	2.97632
	4	Pacific Dev.	0	0	0	0	0	0	0	0	0	0	0	0.0094816	0.0130469	0.0201321	0.0269288	0.0395754	0.0516296	0.0727663	0.0889366	0.110882	0.110882	0.114578	0.0926187	0.10148	0.123503	0.154908	0.201012	0.292057	0.319963	0.34787	0.375777	0.403683	0.43159	0.459497	0.487403	0.51531	0.543217	0.571123	0.773784	0.97499	1.1762	1.3774	1.57861	1.77981	1.98102	2.18222	2.38343
	5	China	0	0	0	0	0	0	0.0341358	0.0760435	0.152087	0.304174	0.91	0.923054	0.936518	0.948957	0.961747	0.974993	0.988826	1.00342	1.01897	1.18144	1.21087	1.24225	1.27895	1.29758	1.32808	1.69318	1.74767	1.80845	2.03429	2.26013	2.48597	2.71182	2.93766	3.1635	3.38934	3.61518	3.84103	4.06687	4.80133	5.53579	6.27025	7.00471	7.73917	8.47362	9.20808	9.94254	10.677
	6	Latin America	0	0	0	0	0	0	0	0	0	0.03489	0.114679	0.123405	0.131196	0.139487	0.148311	0.157707	0.167712	0.180325	0.193277	0.220788	0.24685	0.273056	0.299171	0.326089	0.352596	0.381976	0.103483	0.134366	0.155286	0.176207	0.197127	0.218048	0.238968	0.259889	0.280809	0.30173	0.32265	0.343571	0.528875	0.714179	0.899483	1.08479	1.27009	1.4554	1.6407	1.826	2.01131
	7	N.Africa_M.East	0	0	0	0.00144893	0.0391012	0.18159	0.842318	0.972117	1.03139	1.11538	1.28448	1.36022	1.43744	1.49541	1.53596	1.57672	1.61893	1.71243	1.80768	1.86987	1.913	1.92867	1.97473	2.01031	2.04282	2.1059	2.29914	2.42643	2.47857	2.51651	2.55445	2.59238	2.63032	2.66825	2.70619	2.74413	2.78206	2.82	2.94499	3.06999	3.19499	3.31998	3.44498	3.56998	3.69497	3.81997	3.94497
	8	Tropical Africa	0	0	0	0	0	0	0	0	0	0	0.0121731	0.012613	0.0130686	0.0135404	0.0140289	0.0164129	0.0174125	0.0204221	0.0221469	0.0243703	0.0285397	0.0333459	0.036896	0.0454183	0.0522837	0.0609617	0.0721183	0.0948512	0.10615	0.117448	0.128747	0.140045	0.151344	0.162642	0.17394	0.185239	0.196537	0.207836	0.26514	0.322443	0.379747	0.437051	0.494355	0.551659	0.608963	0.666266	0.72357
	9	South Asia	0	0	0	0	0	0	0.145842	0.232899	0.374244	0.605321	0.994237	0.96198	0.927588	0.896752	0.863929	0.829732	0.79468	0.779369	0.760296	0.75186	0.738703	0.697303	0.657439	0.602338	0.600345	0.574904	0.635591	0.709472	0.835959	0.962446	1.08893	1.21542	1.34191	1.46839	1.59488	1.72137	1.84785	1.97434	3.41803	4.86173	6.30542	7.74911	9.1928	10.6365	12.0802	13.5239	14.9676
	10	SE Asia	0	0	0	0	0	0	0	0	0	0.00130593	0.00253125	0.00466429	0.00529418	0.00598463	0.00674445	0.00758366	0.00851362	0.00954728	0.0106993	0.0119864	0.0153438	0.0210752	0.0255254	0.0288398	0.0374969	0.0477733	0.0559246	0.0672209	0.0818542	0.0964874	0.111121	0.125754	0.140387	0.155021	0.169654	0.184287	0.19892	0.213554	0.401533	0.589511	0.77749	0.965469	1.15345	1.34143	1.52941	1.71738	1.90536
			0	0	0	0.00144893	0.0391012	0.18159	1.0223	1.28106	1.55772	2.06107	3.41004	3.50976	3.64615	3.69823	3.73094	3.75872	3.79138	3.93728	4.08184	4.36137	4.46947	4.55123	4.65424	4.73922	4.82885	5.35523	5.50448	5.96594	6.50512	7.03009	7.55506	8.08003	8.605	9.12997	9.65495	10.1799	10.7049	11.2299	14.9937	18.7571	22.5204	26.2837	30.047	33.8104	37.5737	41.337	45.1003
		1700 estimate (Mha)	HYDE	Siebert	tuning factor	diff
		North America	0.005057	0.00505656		4.438e-07
		Europe	0.17326			0.17326
		USSR	0.254781	0.324448		-0.0696677
		Pacific Dev.	0.292057			0.292057
		China	1.80845	1.68404		0.124409
		Latin America	0.134366			0.134366
		N.Africa_M.East	2.42643			2.42643
		Tropical Africa	0.0948512			0.0948512
		South Asia	0.709472			0.709472
		SE Asia	0.0672209			0
		total	5.96594	5.13463		0.831319
Best estimate
Total actual irrigated land estimate, in Mkm2			-10000	-9000	-8000	-7000	-6000	-5000	-4000	-3000	-2000	-1000	0	100	200	300	400	500	600	700	800	900	1000	1100	1200	1300	1400	1500	1600	1700	1710	1720	1730	1740	1750	1760	1770	1780	1790	1800	1810	1820	1830	1840	1850	1860	1870	1880	1890
	1	Canada	0	0	0	0	0	0	0	0	0	0	0	0	0	0	0	0	0	0	0	0	0	0	0	0	0	0	0	0	0	0	0	0	0	0	0	0	0	0	3.24e-05	6.48e-05	9.72e-05	0.0001296	0.000162	0.0001944	0.0002268	0.0002592	0.0002916
	2	USA	0	0	0	0	0	0	0	0	0	0	0	0	0	0	0	0	0	0	4.1434e-05	4.67726e-05	5.21395e-05	5.65514e-05	6.29808e-05	6.86328e-05	7.67456e-05	8.43669e-05	3.98899e-05	5.057e-05	6.21987e-05	7.38274e-05	8.54561e-05	9.70849e-05	0.000108714	0.000120342	0.000131971	0.0001436	0.000155228	0.000166857	0.00330211	0.00643736	0.00957261	0.0127079	0.0158431	0.0189784	0.0221136	0.0252489	0.0283841
	3	Mexico	0	0	0	0	0	0	0	0	0	0	0.000533806	0.000574568	0.000618442	0.000665667	0.000716498	0.000771213	0.000830106	0.000893497	0.00096173	0.00113065	0.00130604	0.00151033	0.0017224	0.00194248	0.00217081	0.00240764	9.82673e-05	0.000401076	0.000481506	0.000561935	0.000642364	0.000722793	0.000803223	0.000883652	0.000964081	0.00104451	0.00112494	0.00120537	0.00186383	0.00252229	0.00318075	0.00383922	0.00449768	0.00515614	0.0058146	0.00647306	0.00713153
	4	Rest Central America	0	0	0	0	0	0	0	0	0	0	0	0	0	0	0	0	0	0	1.52414e-05	2.22286e-05	2.87422e-05	2.96392e-05	3.03287e-05	3.07789e-05	3.09471e-05	3.07727e-05	2.15469e-05	3.48865e-05	3.86718e-05	4.2457e-05	4.62422e-05	5.00275e-05	5.38127e-05	5.75979e-05	6.13832e-05	6.51684e-05	6.89536e-05	7.27389e-05	0.000130501	0.000188264	0.000246026	0.000303789	0.000361551	0.000419314	0.000477076	0.000534839	0.000592601
	5	Brazil	0	0	0	0	0	0	0	0	0	0	0	0	0	0	0	0	0	0	0	0	0	0	0	0	0	0	0	1.6e-07	2.09e-07	2.58e-07	3.07e-07	3.56e-07	4.05e-07	4.54e-07	5.03e-07	5.52e-07	6.01e-07	6.5e-07	9.85e-07	1.32e-06	1.655e-06	1.99e-06	2.325e-06	2.66e-06	2.995e-06	3.33e-06	3.665e-06
	6	Rest South America	0	0	0	0	0	0	0	0	0	0.0003489	0.000612988	0.000659487	0.000693523	0.000729203	0.000766615	0.000805854	0.000847018	0.000909751	0.000955801	0.001055	0.00113371	0.00119059	0.00123898	0.00128763	0.00132421	0.00138135	0.000915012	0.000907537	0.00103248	0.00115742	0.00128236	0.0014073	0.00153224	0.00165718	0.00178212	0.00190707	0.00203201	0.00215695	0.00329343	0.00442991	0.0055664	0.00670288	0.00783936	0.00897585	0.0101123	0.0112488	0.0123853
	7	Northern Africa	0	0	0	0	0.000345664	0.00155117	0.007	0.008	0.0085	0.009	0.0107442	0.0113637	0.0119837	0.0125488	0.0131143	0.0136954	0.0142773	0.014871	0.0154982	0.0161267	0.0167531	0.0172807	0.0178299	0.0184215	0.0189507	0.0195518	0.0211635	0.0224768	0.0227112	0.0229457	0.0231801	0.0234146	0.0236491	0.0238835	0.024118	0.0243524	0.0245869	0.0248214	0.0252072	0.0255931	0.0259789	0.0263648	0.0267506	0.0271365	0.0275223	0.0279082	0.028294
	8	Western Africa	0	0	0	0	0	0	0	0	0	0	0	0	0	0	0	1.87818e-05	2.35398e-05	2.95024e-05	3.69745e-05	4.63383e-05	5.80722e-05	9.15798e-05	0.000112577	0.000172854	0.000208256	0.000250932	0.000306985	0.0004403	0.000458892	0.000477485	0.000496078	0.00051467	0.000533263	0.000551856	0.000570449	0.000589041	0.000607634	0.000626227	0.000635161	0.000644096	0.00065303	0.000661964	0.000670899	0.000679833	0.000688768	0.000697702	0.000706637
	9	Eastern Africa	0	0	0	0	0	0	0	0	0	0	0.000121731	0.00012613	0.000130686	0.000135404	0.000140289	0.000145347	0.000150585	0.000174718	0.000184494	0.000197365	0.000210296	0.000217025	0.000223782	0.00024106	0.000258418	0.000293817	0.000317255	0.000357445	0.000425361	0.000493276	0.000561191	0.000629107	0.000697022	0.000764938	0.000832853	0.000900768	0.000968684	0.0010366	0.00118315	0.0013297	0.00147625	0.0016228	0.00176935	0.0019159	0.00206245	0.00220901	0.00235556
	10	Southern Africa	0	0	0	0	0	0	0	0	0	0	0	0	0	0	0	0	0	0	0	0	1.70283e-05	2.4854e-05	3.26012e-05	4.02687e-05	5.61631e-05	6.48682e-05	9.69424e-05	0.000150767	0.000177244	0.00020372	0.000230197	0.000256674	0.00028315	0.000309627	0.000336103	0.00036258	0.000389056	0.000415533	0.000833086	0.00125064	0.00166819	0.00208574	0.0025033	0.00292085	0.0033384	0.00375596	0.00417351
	11	Western Europe	0	0	0	0	0	0	0	0	0	0	0.000374526	0.000447657	0.00107647	0.000985239	0.000884216	0.000653391	0.000468532	0.00055623	0.000638309	0.000689039	0.000787126	0.000956803	0.00124701	0.00144329	0.00110393	0.00133607	0.00161266	0.00169194	0.00185903	0.00202612	0.00219321	0.00236029	0.00252738	0.00269447	0.00286156	0.00302864	0.00319573	0.00336282	0.00585216	0.00835048	0.0108488	0.0133471	0.0158454	0.0183438	0.0208421	0.0233404	0.0258387
	12	Central Europe	0	0	0	0	0	0	0	0	0	0	0	0	0	0	0	0	0	0	0	0	0	0	0	0	0	0	0	4.0662e-05	4.45302e-05	4.83984e-05	5.22666e-05	5.61348e-05	6.0003e-05	6.38711e-05	6.77393e-05	7.16075e-05	7.54757e-05	7.93439e-05	0.000136492	0.00019364	0.000250787	0.000307935	0.000365083	0.000422231	0.000479379	0.000536526	0.000593674
	13	Turkey	0	0	0	5.51559e-06	1.65468e-05	0.000104796	0.000171715	0.000233702	0.000448996	0.000639477	0.000792738	0.000850946	0.000907581	0.000834187	0.000761728	0.000690259	0.000619843	0.000672898	0.000723709	0.000786861	0.000846691	0.00060755	0.000701736	0.000789648	0.000619147	0.000646254	0.000795626	0.000803993	0.000866317	0.000928641	0.000990965	0.00105329	0.00111561	0.00117794	0.00124026	0.00130259	0.00136491	0.00142723	0.0016795	0.00193176	0.00218402	0.00243629	0.00268855	0.00294081	0.00319308	0.00344534	0.0036976
	14	Ukraine +	0	0	0	0	0	0	0	0	0	0	0	0	0	0	0	0	0	0	0	0	0	0	0	0	0	0	0	6.81551e-06	8.46867e-06	1.01218e-05	1.1775e-05	1.34281e-05	1.50813e-05	1.67345e-05	1.83876e-05	2.00408e-05	2.16939e-05	2.33471e-05	4.71335e-05	7.09198e-05	9.47062e-05	0.000118493	0.000142279	0.000166065	0.000189852	0.000213638	0.000237424
	15	Asia-Stan	0	0	0	0	0	0	0	0	0	0	0.000439192	0.000582403	0.000621909	0.000663993	0.000708808	0.000756513	0.000807272	0.000861257	0.00093355	0.000970189	0.00100714	0.00108076	0.0011576	0.00123489	0.00131513	0.00140922	0.00161138	0.00180305	0.00213973	0.0024764	0.00281307	0.00314974	0.00348642	0.00382309	0.00415976	0.00449644	0.00483311	0.00516978	0.00713857	0.00910736	0.0110762	0.0130449	0.0150137	0.0169825	0.0189513	0.0209201	0.0228889
	16	Russia +	0	0	0	0	0	0	0	0	0	0	0.000105651	0.000113356	0.000121614	0.000130463	0.000139943	0.000150096	0.00016097	0.000172611	0.00018507	0.0001957	0.000206309	0.000315382	0.000421477	0.000524835	0.000421402	0.000526571	0.000631394	0.000737939	0.000816497	0.000895054	0.000973611	0.00105217	0.00113073	0.00120928	0.00128784	0.0013664	0.00144496	0.00152351	0.00209167	0.00265982	0.00322797	0.00379613	0.00436428	0.00493244	0.00550059	0.00606874	0.0066369
	17	Middle East	0	0	0	8.97369e-06	2.88015e-05	0.000159932	0.00125146	0.00148746	0.0013649	0.00151433	0.00130794	0.00138753	0.00148307	0.0015711	0.00148354	0.00138151	0.00129213	0.00158031	0.0018548	0.00178516	0.0015303	0.0013984	0.00121569	0.000891951	0.000858347	0.000860921	0.00103226	0.000983587	0.00120821	0.00129078	0.00137336	0.00145593	0.00153851	0.00162108	0.00170366	0.00178623	0.0018688	0.00195138	0.00256323	0.00317507	0.00378692	0.00439877	0.00501061	0.00562246	0.00623431	0.00684615	0.007458
	18	India +	0	0	0	0	0	0	0.00145842	0.00232899	0.00374244	0.00605321	0.00994237	0.0096198	0.00927588	0.00896752	0.00863929	0.00829732	0.0079468	0.00779369	0.00760296	0.0075186	0.00738703	0.00697303	0.00657439	0.00602338	0.00600345	0.00574904	0.00635591	0.00709472	0.00835959	0.00962446	0.0108893	0.0121542	0.0134191	0.0146839	0.0159488	0.0172137	0.0184785	0.0197434	0.0341803	0.0486173	0.0630542	0.0774911	0.091928	0.106365	0.120802	0.135239	0.149676
	19	Korea	0	0	0	0	0	0	0	0	0	0	0	1.80378e-05	4.01819e-05	5.2066e-05	6.74707e-05	8.74277e-05	0.00011326	0.000146653	0.000189746	0.000207284	0.000223013	0.000258237	0.000330829	0.000237106	0.000262451	0.000281773	0.00032611	0.000368694	0.000471	0.000573305	0.000675611	0.000777916	0.000880221	0.000982527	0.00108483	0.00118714	0.00128944	0.00139175	0.0017365	0.00208124	0.00242599	0.00277073	0.00311548	0.00346023	0.00380497	0.00414972	0.00449447
	20	China +	0	0	0	0	0	0	0.000341358	0.000760435	0.00152087	0.00304174	0.0091	0.0092125	0.009325	0.0094375	0.00955	0.0096625	0.009775	0.0098875	0.01	0.0116071	0.0118857	0.0121643	0.0124587	0.0127387	0.0130184	0.01665	0.0171506	0.0177158	0.0198719	0.022028	0.0241841	0.0263402	0.0284964	0.0306525	0.0328086	0.0349647	0.0371208	0.0392769	0.0462768	0.0532766	0.0602765	0.0672763	0.0742762	0.081276	0.0882759	0.0952757	0.102276
	21	Southeastern Asia	0	0	0	0	0	0	0	0	0	1.30593e-05	2.53125e-05	2.78417e-05	3.03708e-05	3.28999e-05	3.5429e-05	3.79581e-05	4.04872e-05	4.30163e-05	4.55455e-05	4.80747e-05	6.97672e-05	0.000107455	0.000129002	0.000135365	0.000158172	0.000200305	0.000244478	0.000311389	0.00038731	0.00046323	0.000539151	0.000615072	0.000690993	0.000766914	0.000842834	0.000918755	0.000994676	0.0010706	0.00205688	0.00304316	0.00402945	0.00501573	0.00600201	0.00698829	0.00797458	0.00896086	0.00994714
	22	Indonesia +	0	0	0	0	0	0	0	0	0	0	0	1.88011e-05	2.2571e-05	2.69464e-05	3.20155e-05	3.78785e-05	4.4649e-05	5.24565e-05	6.14477e-05	7.17894e-05	8.36707e-05	0.000103297	0.000126252	0.000153033	0.000216796	0.000277428	0.000314768	0.00036082	0.000431232	0.000501644	0.000572056	0.000642468	0.00071288	0.000783291	0.000853703	0.000924115	0.000994527	0.00106494	0.00195845	0.00285195	0.00374546	0.00463896	0.00553247	0.00642598	0.00731948	0.00821299	0.00910649
	23	Japan	0	0	0	0	0	0	0	0	0	0	0	9.4816e-05	0.000130469	0.000201321	0.000269288	0.000395754	0.000516296	0.000727663	0.000889366	0.00110882	0.00110882	0.00114578	0.000926187	0.0010148	0.00123503	0.00154908	0.00201012	0.00292057	0.00319963	0.0034787	0.00375777	0.00403683	0.0043159	0.00459497	0.00487403	0.0051531	0.00543217	0.00571123	0.00768386	0.00965649	0.0116291	0.0136017	0.0155744	0.017547	0.0195196	0.0214922	0.0234649
	24	Oceania	0	0	0	0	0	0	0	0	0	0	0	0	0	0	0	0	0	0	0	0	0	0	0	0	0	0	0	0	0	0	0	0	0	0	0	0	0	0	5.39837e-05	9.34123e-05	0.000132841	0.00017227	0.000211698	0.000251127	0.000290556	0.000329984	0.000369413
	25	Greenland	0	0	0	0	0	0	0	0	0	0	0	0	0	0	0	0	0	0	0	0	0	0	0	0	0	0	0	0	0	0	0	0	0	0	0	0	0	0	0	0	0	0	0	0	0	0	0
	26	Antarctica	0	0	0	0	0	0	0	0	0	0	0	0	0	0	0	0	0	0	0	0	0	0	0	0	0	0	0	0	0	0	0	0	0	0	0	0	0	0	0	0	0	0	0	0	0	0	0
		total	0	0	0	1.44893e-05	0.000391012	0.0018159	0.010223	0.0128106	0.0155772	0.0206107	0.0341004	0.0350976	0.0364615	0.0369823	0.0373094	0.0375872	0.0379138	0.0393728	0.0408184	0.0436137	0.0446947	0.0455123	0.0465424	0.0473922	0.0482885	0.0535523	0.0550448	0.0596594	0.0650512	0.0703009	0.0755506	0.0808003	0.08605	0.0912997	0.0965495	0.101799	0.107049	0.112299	0.149937	0.187571	0.225204	0.262837	0.30047	0.338104	0.375737	0.41337	0.451003
	1	North America	0	0	0	0	0	0	0	0	0	0	0	0	0	0	0	0	0	0	4.1434e-05	4.67726e-05	5.21395e-05	5.65514e-05	6.29808e-05	6.86328e-05	7.67456e-05	8.43669e-05	3.98899e-05	5.057e-05	6.21987e-05	7.38274e-05	8.54561e-05	9.70849e-05	0.000108714	0.000120342	0.000131971	0.0001436	0.000155228	0.000166857	0.00333451	0.00650216	0.00966981	0.0128375	0.0160051	0.0191728	0.0223404	0.0255081	0.0286757
	2	Europe	0	0	0	0	0	0	0	0	0	0	0	0	0	0	0	0	0	0	0	0	0	0	0	0	0	0	0	0	0	0	0	0	0	0	0	0	0	0	0	0	0	0	0	0	0	0	0
	3	USSR	0	0	0	0	0	0	0	0	0	0	0.000544842	0.000695759	0.000743524	0.000794456	0.000848751	0.000906609	0.000968242	0.00103387	0.00111862	0.00116589	0.00121344	0.00139615	0.00157908	0.00175973	0.00173653	0.00193579	0.00224278	0.00254099	0.00295622	0.00337145	0.00378668	0.00420191	0.00461714	0.00503237	0.0054476	0.00586283	0.00627806	0.00669329	0.00923024	0.0117672	0.0143041	0.0168411	0.019378	0.021915	0.0244519	0.0269889	0.0295258
	4	Pacific Dev.	0	0	0	0	0	0	0	0	0	0	0	9.4816e-05	0.000130469	0.000201321	0.000269288	0.000395754	0.000516296	0.000727663	0.000889366	0.00110882	0.00110882	0.00114578	0.000926187	0.0010148	0.00123503	0.00154908	0.00201012	0.00292057	0.00319963	0.0034787	0.00375777	0.00403683	0.0043159	0.00459497	0.00487403	0.0051531	0.00543217	0.00571123	0.00773784	0.0097499	0.011762	0.013774	0.0157861	0.0177981	0.0198102	0.0218222	0.0238343
	5	China	0	0	0	0	0	0	0.000341358	0.000760435	0.00152087	0.00304174	0.0091	0.00923054	0.00936518	0.00948957	0.00961747	0.00974993	0.00988826	0.0100342	0.0101897	0.0118144	0.0121087	0.0124225	0.0127895	0.0129758	0.0132808	0.0169318	0.0174767	0.0180845	0.0203429	0.0226013	0.0248597	0.0271182	0.0293766	0.031635	0.0338934	0.0361518	0.0384103	0.0406687	0.0480133	0.0553579	0.0627025	0.0700471	0.0773917	0.0847362	0.0920808	0.0994254	0.10677
	6	Latin America	0	0	0	0	0	0	0	0	0	0	0.000533806	0.000574568	0.000618442	0.000665667	0.000716498	0.000771213	0.000830106	0.000893497	0.000976972	0.00115287	0.00133479	0.00153997	0.00175272	0.00197325	0.00220175	0.00243841	0.000119814	0.000435963	0.000520177	0.000604392	0.000688606	0.000772821	0.000857035	0.00094125	0.00102546	0.00110968	0.00119389	0.00127811	0.00199433	0.00271056	0.00342678	0.00414301	0.00485923	0.00557545	0.00629168	0.0070079	0.00772413
	7	N.Africa_M.East	0	0	0	8.97369e-06	2.88015e-05	0.000159932	0.00125146	0.00148746	0.0013649	0.00151433	0.00130794	0.00138753	0.00148307	0.0015711	0.00148354	0.00138151	0.00129213	0.00158031	0.0018548	0.00178516	0.0015303	0.0013984	0.00121569	0.000891951	0.000858347	0.000860921	0.00103226	0.000983587	0.00120821	0.00129078	0.00137336	0.00145593	0.00153851	0.00162108	0.00170366	0.00178623	0.0018688	0.00195138	0.00256323	0.00317507	0.00378692	0.00439877	0.00501061	0.00562246	0.00623431	0.00684615	0.007458
	8	Tropical Africa	0	0	0	0	0	0	0	0	0	0	0	0	0	0	0	0	0	0	0	0	0	0	0	0	0	0	0	0	0	0	0	0	0	0	0	0	0	0	0	0	0	0	0	0	0	0	0
	9	South Asia	0	0	0	0	0	0	0.00145842	0.00232899	0.00374244	0.00605321	0.00994237	0.0096198	0.00927588	0.00896752	0.00863929	0.00829732	0.0079468	0.00779369	0.00760296	0.0075186	0.00738703	0.00697303	0.00657439	0.00602338	0.00600345	0.00574904	0.00635591	0.00709472	0.00835959	0.00962446	0.0108893	0.0121542	0.0134191	0.0146839	0.0159488	0.0172137	0.0184785	0.0197434	0.0341803	0.0486173	0.0630542	0.0774911	0.091928	0.106365	0.120802	0.135239	0.149676
	10	SE Asia	0	0	0	0	0	0	0	0	0	1.30593e-05	2.53125e-05	4.66429e-05	5.29418e-05	5.98463e-05	6.74445e-05	7.58366e-05	8.51362e-05	9.54728e-05	0.000106993	0.000119864	0.000153438	0.000210752	0.000255254	0.000288398	0.000374969	0.000477733	0.000559246	0.000672209	0.000818542	0.000964874	0.00111121	0.00125754	0.00140387	0.00155021	0.00169654	0.00184287	0.0019892	0.00213554	0.00401533	0.00589511	0.0077749	0.00965469	0.0115345	0.0134143	0.0152941	0.0171738	0.0190536
		total	0	0	0	8.97369e-06	2.88015e-05	0.000159932	0.00305124	0.00457689	0.00662822	0.0106223	0.0214543	0.0216497	0.0216695	0.0217495	0.0216423	0.0215782	0.021527	0.0221587	0.0227809	0.0247124	0.0248887	0.0251431	0.0251558	0.0249959	0.0257677	0.0300272	0.0298368	0.0327831	0.0374675	0.0420098	0.0465521	0.0510945	0.0556368	0.0601792	0.0647215	0.0692638	0.0738062	0.0783485	0.111069	0.143775	0.176481	0.209187	0.241893	0.274599	0.307305	0.340011	0.372717
Voor GEB paper table			-10000	-9000	-8000	-7000	-6000	-5000	-4000	-3000	-2000	-1000	0	100	200	300	400	500	600	700	800	900	1000	1100	1200	1300	1400	1500	1600	1700	1710	1720	1730	1740	1750	1760	1770	1780	1790	1800	1810	1820	1830	1840	1850	1860	1870	1880	1890
		Americas	0	0	0	0	0	0	0	0	0	0	0.000533806	0.000574568	0.000618442	0.000665667	0.000716498	0.000771213	0.000830106	0.000893497	0.00101841	0.00119965	0.00138693	0.00159652	0.00181571	0.00204189	0.0022785	0.00252278	0.000159704	0.000486533	0.000582376	0.000678219	0.000774063	0.000869906	0.000965749	0.00106159	0.00115744	0.00125328	0.00134912	0.00144497	0.00532884	0.00921272	0.0130966	0.0169805	0.0208643	0.0247482	0.0286321	0.032516	0.0363998
		Europe incl. Turkey	0	0	0	0	0	0	0	0	0	0	0	0	0	0	0	0	0	0	0	0	0	0	0	0	0	0	0	0	0	0	0	0	0	0	0	0	0	0	0	0	0	0	0	0	0	0	0
		former USSR	0	0	0	0	0	0	0	0	0	0	0.000544842	0.000695759	0.000743524	0.000794456	0.000848751	0.000906609	0.000968242	0.00103387	0.00111862	0.00116589	0.00121344	0.00139615	0.00157908	0.00175973	0.00173653	0.00193579	0.00224278	0.00254099	0.00295622	0.00337145	0.00378668	0.00420191	0.00461714	0.00503237	0.0054476	0.00586283	0.00627806	0.00669329	0.00923024	0.0117672	0.0143041	0.0168411	0.019378	0.021915	0.0244519	0.0269889	0.0295258
		Asia+Pacific	0	0	0	8.97369e-06	2.88015e-05	0.000159932	0.00305124	0.00457689	0.00662822	0.0106223	0.0203756	0.0203793	0.0203075	0.0202894	0.020077	0.0199003	0.0197286	0.0202313	0.0206439	0.0223469	0.0222883	0.0221505	0.021761	0.0211943	0.0217526	0.0255686	0.0274343	0.0297555	0.0339289	0.0379601	0.0419914	0.0460227	0.0500539	0.0540852	0.0581165	0.0621477	0.066179	0.0702103	0.09651	0.122795	0.14908	0.175366	0.201651	0.227936	0.254221	0.280506	0.306792
		Africa	0	0	0	0	0	0	0	0	0	0	0	0	0	0	0	0	0	0	0	0	0	0	0	0	0	0	0	0	0	0	0	0	0	0	0	0	0	0	0	0	0	0	0	0	0	0	0
		total	0	0	0	8.97369e-06	2.88015e-05	0.000159932	0.00305124	0.00457689	0.00662822	0.0106223	0.0214543	0.0216497	0.0216695	0.0217495	0.0216423	0.0215782	0.021527	0.0221587	0.0227809	0.0247124	0.0248887	0.0251431	0.0251558	0.0249959	0.0257677	0.0300272	0.0298368	0.0327831	0.0374675	0.0420098	0.0465521	0.0510945	0.0556368	0.0601792	0.0647215	0.0692638	0.0738062	0.0783485	0.111069	0.143775	0.176481	0.209187	0.241893	0.274599	0.307305	0.340011	0.372717
Best estimate
Actual irrigated land per capita (ha/cap)			-10000	-9000	-8000	-7000	-6000	-5000	-4000	-3000	-2000	-1000	0	100	200	300	400	500	600	700	800	900	1000	1100	1200	1300	1400	1500	1600	1700	1710	1720	1730	1740	1750	1760	1770	1780	1790	1800	1810	1820	1830	1840	1850	1860	1870	1880	1890
	1	Canada	0	0	0	0	0	0	0	0	0	0	0	0	0	0	0	0	0	0	0	0	0	0	0	0	0	0	0	0	0	0	0	0	0	0	0	0	0	0	0.0028233	0.0047123	0.00588554	0.00651969	0.00675619	0.00572159	0.00582667	0.00571333	0.00571834
	2	USA	0	0	0	0	0	0	0	0	0	0	0	0	0	0	0	0	0	0	0.00425543	0.00426957	0.00428278	0.00431194	0.0043349	0.00436652	0.00441211	0.00446983	0.00511805	0.00544429	0.00452443	0.0040551	0.0037704	0.00357929	0.00344213	0.00333889	0.00325837	0.00319381	0.00314089	0.0026412	0.0403697	0.0607138	0.0691516	0.0705232	0.0665799	0.0595053	0.0567486	0.0499125	0.0449594
	3	Mexico	0	0	0	0	0	0	0	0	0	0	0.00711748	0.00726237	0.00741022	0.00756108	0.00771503	0.00787211	0.00803241	0.00819597	0.00836287	0.00853318	0.00870696	0.00888429	0.00906524	0.00924988	0.00943829	0.00963055	0.00982673	0.0100269	0.0111057	0.0120294	0.0128292	0.0135286	0.0141452	0.014693	0.0151829	0.0156236	0.0160222	0.0163844	0.0242292	0.031418	0.0380298	0.0441313	0.0497794	0.0550229	0.0599037	0.0644582	0.0601857
	4	Rest Central America	0	0	0	0	0	0	0	0	0	0	0	0	0	0	0	0	0	0	0.00124988	0.00147386	0.00157372	0.00142936	0.00127732	0.00111835	0.000953286	0.000783558	0.0011625	0.00209545	0.00222571	0.00232972	0.00240607	0.00245373	0.00247226	0.00246174	0.00242289	0.0023456	0.00224936	0.00213667	0.00341592	0.00444854	0.00503262	0.00553634	0.00582771	0.00613567	0.00628202	0.00632545	0.00628507
	5	Brazil	0	0	0	0	0	0	0	0	0	0	0	0	0	0	0	0	0	0	0	0	0	0	0	0	0	0	0	2.90246e-05	3.29572e-05	3.51835e-05	3.60149e-05	3.57356e-05	3.46013e-05	3.2838e-05	3.06416e-05	2.81774e-05	2.55818e-05	2.29631e-05	2.71762e-05	2.96546e-05	2.92782e-05	2.90007e-05	2.87736e-05	2.85727e-05	2.83795e-05	2.83639e-05	2.51308e-05
	6	Rest South America	0	0	0	0	0	0	0	0	0	0.0114379	0.0164272	0.0166006	0.0163982	0.0161953	0.0159915	0.0157864	0.0155794	0.0157074	0.0154857	0.0154642	0.0151676	0.0145157	0.0138746	0.0133255	0.0127372	0.0124109	0.0166537	0.0169584	0.0189552	0.0208777	0.0227283	0.0245089	0.0262215	0.027868	0.02945	0.0309692	0.0324273	0.0338257	0.0506453	0.0634502	0.0675364	0.071142	0.0715091	0.0696273	0.0705149	0.0671407	0.0595745
	7	Northern Africa	0	0	0	0	0.107743	0.308555	0.78652	0.396099	0.271537	0.195081	0.131024	0.130941	0.130792	0.142565	0.155237	0.171831	0.190379	0.186217	0.179585	0.1686	0.159552	0.181901	0.200334	0.190007	0.22242	0.235555	0.192387	0.241667	0.243607	0.244241	0.244845	0.24542	0.245963	0.246472	0.246944	0.247377	0.247766	0.248107	0.238092	0.228299	0.206319	0.188641	0.174103	0.172221	0.157662	0.144868	0.124053
	8	Western Africa	0	0	0	0	0	0	0	0	0	0	0	0	0	0	0	0.000249532	0.000257349	0.000263703	0.000268476	0.000293439	0.000324447	0.000461417	0.000513771	0.000699549	0.000747094	0.000805698	0.000846464	0.00104008	0.00107956	0.00112054	0.00116043	0.00119913	0.00123654	0.00127256	0.00130707	0.00133995	0.00137106	0.00140023	0.00140592	0.00140909	0.0014103	0.0014093	0.0014058	0.00139941	0.00138684	0.00137011	0.00134816
	9	Eastern Africa	0	0	0	0	0	0	0	0	0	0	0.00415328	0.00396709	0.00376416	0.00354549	0.00331262	0.00306763	0.00281301	0.00285752	0.00260938	0.00258021	0.00255582	0.00243478	0.00233124	0.00230525	0.00228379	0.002397	0.0023664	0.00245552	0.00287978	0.0032992	0.00370682	0.00410225	0.00448506	0.00485469	0.0052105	0.00555171	0.00587625	0.00618465	0.00693707	0.00765407	0.00781068	0.00793426	0.00802903	0.00804845	0.00809439	0.00811116	0.00811289
	10	Southern Africa	0	0	0	0	0	0	0	0	0	0	0	0	0	0	0	0	0	0	0	0	0.000557858	0.000626127	0.000666964	0.000693313	0.000824254	0.00098787	0.00128997	0.00174451	0.00234561	0.00265605	0.0029556	0.00324401	0.00352097	0.0037861	0.00403898	0.00427909	0.00450584	0.00471851	0.00926593	0.013609	0.0177334	0.021213	0.0239838	0.0261629	0.0279468	0.0274518	0.0280938
	11	Western Europe	0	0	0	0	0	0	0	0	0	0	0.00147951	0.00169835	0.00393871	0.00382058	0.00364641	0.00316533	0.00277481	0.00298954	0.00309551	0.00298906	0.00306816	0.00306941	0.00294857	0.00234243	0.00271189	0.00249923	0.00229705	0.00212463	0.00219104	0.0022927	0.0023826	0.00246615	0.00254351	0.0026143	0.00268005	0.0027309	0.00276829	0.0028103	0.00467778	0.0062178	0.00742894	0.0084505	0.00950825	0.0104032	0.011168	0.0116022	0.0120043
	12	Central Europe	0	0	0	0	0	0	0	0	0	0	0	0	0	0	0	0	0	0	0	0	0	0	0	0	0	0	0	0.000212165	0.000218184	0.000225498	0.000231657	0.000236748	0.000240852	0.000244019	0.000246332	0.000247848	0.000248617	0.000248683	0.000406817	0.000547751	0.000650575	0.000735177	0.000807813	0.000849714	0.000882439	0.000885709	0.000887197
	13	Turkey	0	0	0	0.00413669	0.00827338	0.0165468	0.0160982	0.0155801	0.0149665	0.0142106	0.0132123	0.0130915	0.0129654	0.0128336	0.0126955	0.0125502	0.0123969	0.0122345	0.0120618	0.0118772	0.0116785	0.0114632	0.0112278	0.0109673	0.010675	0.0103401	0.00994533	0.00945874	0.0100743	0.0106447	0.0111969	0.0117311	0.0122477	0.0127472	0.0132299	0.0136962	0.0141465	0.0145811	0.0169132	0.0191757	0.0208904	0.0225266	0.0240304	0.025409	0.026669	0.0281586	0.0296159
	14	Ukraine region	0	0	0	0	0	0	0	0	0	0	0	0	0	0	0	0	0	0	0	0	0	0	0	0	0	0	0	0.000112467	0.000128469	0.000144613	0.000158424	0.000170114	0.000179875	0.000187887	0.000194317	0.000199317	0.000203028	0.000205581	0.00039044	0.000546814	0.000678435	0.000780813	0.000886329	0.000919281	0.000943798	0.000920881	0.000887083
	15	Asia-Stan	0	0	0	0	0	0	0	0	0	0	0.0331613	0.0410429	0.0409052	0.0407617	0.0406119	0.0404555	0.040292	0.0401207	0.0405891	0.0407643	0.0409405	0.0416961	0.0423409	0.041635	0.0408425	0.0402633	0.0402846	0.0401571	0.0459853	0.0515856	0.0567477	0.061478	0.0657849	0.0696782	0.0731691	0.0762699	0.0789943	0.0813566	0.108084	0.132573	0.154904	0.17516	0.193426	0.209791	0.224347	0.226158	0.228958
	16	Russia region	0	0	0	0	0	0	0	0	0	0	0.0071946	0.00691837	0.00671843	0.00657596	0.006477	0.00685229	0.00722629	0.00710698	0.00697326	0.00689814	0.00683141	0.00696208	0.006319	0.00737232	0.00613573	0.00597629	0.00576616	0.00592023	0.00609906	0.00600547	0.00592651	0.00585836	0.00579838	0.00574465	0.00569577	0.00565067	0.00560853	0.0055687	0.00722085	0.00859736	0.00975125	0.00976181	0.010358	0.0102434	0.0105377	0.0101489	0.00970021
	17	Middle East	0	0	0	0.00207409	0.003893	0.0131129	0.0597029	0.0475094	0.0297314	0.0234657	0.0131089	0.0121694	0.0112343	0.0101614	0.00997658	0.00947029	0.00883875	0.0110552	0.0131525	0.0122199	0.0117831	0.010837	0.00931869	0.00779833	0.00793173	0.00749546	0.00759046	0.00771262	0.00929598	0.00979634	0.01028	0.0107471	0.0111976	0.0116317	0.0120493	0.0124504	0.0128351	0.0132033	0.0170367	0.0207169	0.0236788	0.0264074	0.0289068	0.0311966	0.0331456	0.0328265	0.0326061
	18	India region	0	0	0	0	0	0	0.0220727	0.0188895	0.0161836	0.0138242	0.0117724	0.0108087	0.00991565	0.00915632	0.00844254	0.00777447	0.00715138	0.00672445	0.00629998	0.00597473	0.00563905	0.00514174	0.00468814	0.00420315	0.00402283	0.00372419	0.00385656	0.00352977	0.00407076	0.00458901	0.00508575	0.00556219	0.00601941	0.00645845	0.00688026	0.00728571	0.00767562	0.00805076	0.013686	0.0194044	0.0239718	0.0297108	0.0325132	0.0358679	0.0388922	0.0431026	0.04408
	19	Korea	0	0	0	0	0	0	0	0	0	0	0	0.00676976	0.0113503	0.011055	0.0107546	0.0104485	0.010136	0.00981601	0.00948731	0.00921264	0.00892053	0.00860791	0.00827074	0.00790355	0.00749859	0.00704431	0.00652219	0.00589911	0.00685599	0.0078383	0.00867536	0.00938098	0.00996783	0.0104476	0.0108309	0.0111277	0.011347	0.0114969	0.0134649	0.0151473	0.0174177	0.0198341	0.022236	0.0244756	0.0266754	0.0289546	0.0311573
	20	China region	0	0	0	0	0	0	0.00709864	0.009533	0.0114827	0.0227205	0.0155897	0.0177745	0.0213927	0.0422482	0.0312867	0.0255963	0.0193003	0.0234439	0.0300269	0.0288871	0.0318057	0.0133102	0.0119208	0.0157284	0.0180694	0.0180836	0.0173472	0.017533	0.0187835	0.0181587	0.0187577	0.0181757	0.015801	0.0153923	0.0147584	0.0125799	0.0123296	0.0133392	0.0134347	0.0149925	0.0154128	0.0162634	0.0171903	0.0191269	0.0244418	0.0260656	0.0271232
	21	Southeastern Asia	0	0	0	0	0	0	0	0	0	0.000859102	0.00096782	0.000978061	0.00098426	0.000986835	0.000986001	0.000981792	0.000974057	0.000962447	0.000946395	0.00094267	0.00129474	0.00163058	0.00165498	0.0016113	0.0016373	0.00183377	0.00190011	0.00208056	0.00249627	0.00287862	0.0032343	0.0035659	0.00387569	0.00416564	0.00443749	0.00469274	0.00493275	0.00515867	0.00940149	0.013221	0.0161608	0.0185536	0.0205263	0.0213457	0.0220097	0.0217378	0.0215093
	22	Indonesia region	0	0	0	0	0	0	0	0	0	0	0	0.000670496	0.00075011	0.000838042	0.000935231	0.0010427	0.00116158	0.00129311	0.00143865	0.0015997	0.0017779	0.00199865	0.00224141	0.002509	0.00288037	0.00309749	0.00322376	0.00333346	0.0039459	0.00454673	0.0051363	0.00571489	0.00628283	0.00660951	0.0069095	0.00718595	0.00744151	0.00767848	0.0134382	0.0186667	0.0234341	0.0277989	0.0318101	0.0294812	0.0279373	0.0268377	0.0260146
	23	Japan	0	0	0	0	0	0	0	0	0	0	0	0.0189632	0.0186384	0.0183019	0.0179526	0.0175891	0.0172099	0.0161703	0.0161703	0.0173253	0.0184803	0.0184803	0.0144717	0.0139013	0.0132799	0.0125941	0.0118243	0.0109385	0.0110332	0.0119955	0.0129578	0.0139201	0.0148824	0.0159547	0.0170421	0.0181447	0.019263	0.0203973	0.0266801	0.0326233	0.0382537	0.0435953	0.0486699	0.0528946	0.0568306	0.0583917	0.0585495
	24	Oceania	0	0	0	0	0	0	0	0	0	0	0	0	0	0	0	0	0	0	0	0	0	0	0	0	0	0	0	0	0	0	0	0	0	0	0	0	0	0	0.00709858	0.0117147	0.0152601	0.0172392	0.0159124	0.0122959	0.0107275	0.00990106	0.00838133
	25	Greenland	0	0	0	0	0	0	0	0	0	0	0	0	0	0	0	0	0	0	0	0	0	0	0	0	0	0	0	0	0	0	0	0	0	0	0	0	0	0	0	0	0	0	0	0	0	0	0
	26	Antarctica	0	0	0	0	0	0	0	0	0	0	0	0	0	0	0	0	0	0	0	0	0	0	0	0	0	0	0	0	0	0	0	0	0	0	0	0	0	0	0	0	0	0	0	0	0	0	0
		total	0	0	0	0.000151493	0.00296651	0.00953509	0.0355834	0.0288355	0.0214818	0.0186765	0.01469	0.0148145	0.015153	0.0162515	0.0154456	0.0148418	0.0139648	0.0141525	0.0142854	0.014024	0.0138186	0.0114364	0.0104637	0.0103828	0.0109113	0.0106383	0.0106687	0.0100774	0.0106033	0.0109325	0.0113597	0.0116141	0.0115341	0.0117006	0.0117851	0.011419	0.0114854	0.011897	0.0147406	0.0178075	0.0198361	0.0219965	0.0236376	0.0254538	0.0283014	0.0294027	0.0296031
		min	0	0	0	0	0	0	0	0	0	0	0	0	0	0	0	0	0	0	0	0	0	0	0	0	0	0	0	0	0	0	0	0	0	0	0	0	0	0	0	0	0	0	0	0	0	0	0
		max	0	0	0	0.00413669	0.107743	0.308555	0.78652	0.396099	0.271537	0.195081	0.131024	0.130941	0.130792	0.142565	0.155237	0.171831	0.190379	0.186217	0.179585	0.1686	0.159552	0.181901	0.200334	0.190007	0.22242	0.235555	0.192387	0.241667	0.243607	0.244241	0.244845	0.24542	0.245963	0.246472	0.246944	0.247377	0.247766	0.248107	0.238092	0.228299	0.206319	0.188641	0.193426	0.209791	0.224347	0.226158	0.228958
			-10000	-9000	-8000	-7000	-6000	-5000	-4000	-3000	-2000	-1000	0	100	200	300	400	500	600	700	800	900	1000	1100	1200	1300	1400	1500	1600	1700	1710	1720	1730	1740	1750	1760	1770	1780	1790	1800	1810	1820	1830	1840	1850	1860	1870	1880	1890
		Canada	0	0	0	0	0	0	0	0	0	0	0	0	0	0	0	0	0	0	0	0	0	0	0	0	0	0	0	0	0	0	0	0	0	0	0	0	0	0	3.24	6.48	9.72	12.96	16.2	19.44	22.68	25.92	29.16
		China	0	0	0	0	0	0	34.1358	76.0435	152.087	304.174	910	921.25	932.5	943.75	955	966.25	977.5	988.75	1000	1160.71	1188.57	1216.43	1244.29	1272.14	1300	1663.09	1713.29	1763.5	1977.04	2190.58	2404.12	2617.66	2831.2	3044.74	3258.28	3471.82	3685.36	3898.9	4589.11	5279.32	5969.53	6659.74	7349.95	8040.16	8730.37	9420.58	10110.8
		Germany	0	0	0	0	0	0	0	0	0	0	0	0	0	0	0	0	0	0	0	0	1.36701	2.18722	3.55423	4.37444	2.32392	3.00743	3.28083	3.00743	3.44713	3.88684	4.32654	4.76624	5.20595	5.64565	6.08536	6.52506	6.96476	7.40447	15.664	23.9236	32.1831	40.4427	48.7022	56.9618	65.2213	73.4809	81.7404
		India	0	0	0	0	0	0	43.1229	77.2634	138.433	248.031	444.398	424.198	403.998	383.965	364.236	344.92	326.106	307.863	290.241	273.279	257.002	241.426	226.558	212.398	198.941	186.174	174.085	193.428	249.203	304.978	360.752	416.527	472.302	528.077	583.852	639.627	695.401	751.176	1859.45	2967.73	4076	5184.28	6292.56	7400.83	8509.11	9617.38	10725.7
		Indonesia	0	0	0	0	0	0	0	0	0	0	0	1.88011	2.2571	2.69464	3.20155	3.78785	4.4649	5.24565	6.14477	7.17894	8.36707	10.3297	12.6252	15.3033	21.6796	27.7428	31.4768	36.082	43.1232	50.1644	57.2056	64.2468	71.288	78.3291	85.3703	92.4115	99.4527	106.494	195.845	285.195	374.546	463.896	553.247	642.598	731.948	821.299	910.649
		Japan	0	0	0	0	0	0	0	0	0	0	0	9.4816	13.0469	20.1321	26.9288	39.5754	51.6296	72.7663	88.9366	110.882	110.882	114.578	92.6187	101.48	123.503	154.908	201.012	292.057	319.963	347.87	375.777	403.683	431.59	459.497	487.403	515.31	543.217	571.123	768.386	965.649	1162.91	1360.17	1557.44	1754.7	1951.96	2149.22	2346.49
		UK	0	0	0	0	0	0	0	0	0	0	0	0	0	0	0	0	0	0	0	0	0	0	0	0	0	0	0	0	0	0	0	0	0	0	0	0	0	0	0	0	0	0	0	0	0	0	0
		USA	0	0	0	0	0	0	0	0	0	0	0	0	0	0	0	0	0	0	4.1434	4.67726	5.21395	5.65514	6.29808	6.86328	7.67456	8.43669	3.98899	5.057	6.21987	7.38274	8.54561	9.70849	10.8714	12.0342	13.1971	14.36	15.5228	16.6857	330.211	643.736	957.261	1270.79	1584.31	1897.84	2211.36	2524.89	2838.41
		Egypt	0	0	0	0	34.5664	155.117	700	800	850	900	1000	1060	1120	1180	1240	1300	1360	1420	1480	1540	1600	1660	1720	1780	1840	1900	2045.22	2190.43	2204.96	2219.48	2234	2248.52	2263.04	2277.57	2292.09	2306.61	2321.13	2335.65	2350.17	2364.7	2379.22	2393.74	2408.26	2422.78	2437.3	2451.83	2466.35
voor grafiek in paper			-10000	-9000	-8000	-7000	-6000	-5000	-4000	-3000	-2000	-1000	0	100	200	300	400	500	600	700	800	900	1000	1100	1200	1300	1400	1500	1600	1700	1710	1720	1730	1740	1750	1760	1770	1780	1790	1800	1810	1820	1830	1840	1850	1860	1870	1880	1890
		HYDE 3.2	0	0	0	0.00144893	0.0391012	0.18159	1.0223	1.28106	1.55772	2.06107	3.41004	3.50976	3.64615	3.69823	3.73094	3.75872	3.79138	3.93728	4.08184	4.36137	4.46947	4.55123	4.65424	4.73922	4.82885	5.35523	5.50448	5.96608	6.50528	7.03028	7.55528	8.08028	8.60529	9.13029	9.65529	10.1803	10.7053	11.2304	14.9946	18.7584	22.5222	26.2859	30.0497	33.8135	37.5772	41.341	45.1048
		Siebert et al (2008)																												4.507										10.524
		Siebert et al (2014)
		Framji et al (1981)
		Michael, A. (2008), Irrigation, theory and practice. Top 20 countries only
		Li, et al (2009)
		Irrigation Museum (http://www.irrigationmuseum.org/item1.aspx?id=30)
		Siebert et al (2015)
		Freydank and Siebert (2008)																												5.13463										10.6494
[truncated: 120 more columns]

## Sheet: lower
ISO1	y-10000	y-9000	y-8000	y-7000	y-6000	y-5000	y-4000	y-3000	y-2000	y-1000	y0	y100	y200	y300	y400	y500	y600	y700	y800	y900	y1000	y1100	y1200	y1300	y1400	y1500	y1600	y1700	y1710	y1720	y1730	y1740	y1750	y1760	y1770	y1780	y1790	y1800	y1810	y1820	y1830	y1840	y1850	y1860	y1870	y1880	y1890	y1900	y1910
4	0	0	0	0	0	0	0	0	0	0	1.9629	2.4381	2.95645	3.19563	3.42618	3.64771	3.85978	3.94004	3.99831	4.07933	4.14253	4.52105	4.90176	3.52103	3.85701	4.1906	5.31508	5.37114	8.56519	11.8414	15.1998	18.6404	22.1631	25.768	29.455	33.2243	37.0757	41.0093	89.1655	138.43	188.804	240.286	292.877	346.577	401.385	457.303	514.328	572.463	683.915
8	0	0	0	0	0	0	0	0	0	0	0	0	0	0	0	0	0	0	0	0	0	0	0	0	0	0	0	0.331197	0.366099	0.401803	0.43831	0.475619	0.51373	0.552643	0.592359	0.632877	0.674197	0.716319	1.35231	2.00289	2.66806	3.34783	4.0422	4.75116	5.47471	6.21286	6.9656	7.73294	14.548
12	0	0	0	0	0	0	0	0	0	0	9.80032	10.4843	11.0855	11.608	12.0556	12.4323	12.7416	12.9871	13.172	14.7699	16.3848	16.3299	16.206	14.5886	12.8765	13.2517	19.9858	15.5819	19.0106	22.5241	26.1224	29.8054	33.5732	37.4257	41.363	45.3851	49.4919	53.6835	64.5596	75.674	87.0267	98.6175	110.447	122.514	134.82	147.364	160.146	173.166	173.916
16	0	0	0	0	0	0	0	0	0	0	0	0	0	0	0	0	0	0	0	0	0	0	0	0	0	0	0	0	0	0	0	0	0	0	0	0	0	0	0	0	0	0	0	0	0	0	0	0	0
20	0	0	0	0	0	0	0	0	0	0	0	0	0	0	0	0	0	0	0	0	0	0	0	0	0	0	0	0	0	0	0	0	0	0	0	0	0	0	0	0	0	0	0	0	0	0	0	0	0
24	0	0	0	0	0	0	0	0	0	0	0	0	0	0	0	0	0	0	0	0	0	0	0	0	0.549774	0.657184	0.729017	0.804556	1.14481	1.49374	1.85133	2.2176	2.59255	2.97616	3.36844	3.7694	4.17903	4.59733	5.59721	6.61909	7.66296	8.72883	9.81669	10.9266	12.0584	13.2123	14.3881	15.5859	18.2602
28	0	0	0	0	0	0	0	0	0	0	0	0	0	0	0	0	0	0	0	0	0	0	0	0	0	0	0	0	0	0	0	0	0	0	0	0	0	0	0	0	0	0	0	0	0	0	0	0	0
31	0	0	0	0	0	0	0	0	0	0	2.39757	2.88053	3.42232	4.029	4.70722	5.46424	6.30802	7.24724	8.29141	9.32263	10.4173	16.5202	23.2255	30.538	25.6415	33.5736	42.1236	51.2959	57.3143	63.473	69.7721	76.2116	82.7914	89.5117	96.3723	103.373	110.515	117.796	162.4	208.009	254.622	302.241	350.865	400.494	451.128	502.767	555.411	609.061	594.094
32	0	0	0	0	0	0	0	0	0	0	0	0	0	0	0	0	0	0	0	1.02595	1.23951	1.49316	1.79397	2.15027	2.57175	3.06977	3.6576	4.35073	8.3343	12.4212	16.6113	20.9048	25.3016	29.8017	34.4051	39.1118	43.9218	48.8351	108.969	170.487	233.391	297.68	363.354	430.413	498.857	568.686	639.901	712.5	715.225
36	0	0	0	0	0	0	0	0	0	0	0	0	0	0	0	0	0	0	0	0	0	0	0	0	0	0	0	0	0	0	0	0	0	0	0	0	0	0	1.8835	2.54452	3.22023	3.91063	4.61573	5.33551	6.06999	6.81917	7.58303	36.2535	130.4
40	0	0	0	0	0	0	0	0	0	0	0	0	0	0	0	0	0	0	0	0	0	0	0	0	0	0	0	0.196564	0.247558	0.299826	0.353366	0.408179	0.464265	0.521625	0.580257	0.640162	0.70134	0.763791	0	0	0	0	0	0	0	0	0	6.61578	0.119062
44	0	0	0	0	0	0	0	0	0	0	0	0	0	0	0	0	0	0	0	0	0	0	0	0	0	0	0	0	0	0	0	0	0	0	0	0	0	0	0	0	0	0	0	0	0	0	0	0	0
48	0	0	0	0	0	0	0	0	0	0	0	0	0	0	0	0	0	0	0	0	0	0	0	0	0	0	0	0.112073	0.130327	0.149022	0.168158	0.187736	0.207754	0.228213	0.249114	0.270455	0.292238	0.314462	0.412765	0.513269	0.615972	0.720876	0.82798	0.937284	1.04879	1.16249	1.2784	1.3965	1.32765
50	0	0	0	0	0	0	0	0	0	0	0	0	0	0	0	0	0	0	0	0	0	0	0	0	0	0	0	0	0	0	0	0	0	0	0	0	0	0	0	0	0	0	0	0	0	0	0	0	67.734
51	0	0	0	0	0	0	0	0	0	0	0	0	0	0	0	0	0	0	0	0	0	0	0	0	0	0	0	0.27482	0.344676	0.416274	0.489614	0.564696	0.641519	0.720085	0.800392	0.882441	0.966233	1.05177	2.14501	3.26339	4.40691	5.57556	6.76935	7.98828	9.23234	10.5015	11.7959	13.1154	24.4658
52	0	0	0	0	0	0	0	0	0	0	0	0	0	0	0	0	0	0	0	0	0	0	0	0	0	0	0	0	0	0	0	0	0	0	0	0	0	0	0	0	0	0	0	0	0	0	0	0	0.159
56	0	0	0	0	0	0	0	0	0	0	0	0	0	0	0	0	0	0	0	0	0	0	0	0	0	0	0	0.0608172	0.0719413	0.0833367	0.0950035	0.106942	0.119151	0.131632	0.144385	0.157409	0.170704	0.18427	0.349611	0.518746	0.691675	0.8684	1.04892	1.23323	1.42134	1.61324	1.80894	2.00843	1.68074
60	0	0	0	0	0	0	0	0	0	0	0	0	0	0	0	0	0	0	0	0	0	0	0	0	0	0	0	0	0	0	0	0	0	0	0	0	0	0	0	0	0	0	0	0	0	0	0	0	0
64	0	0	0	0	0	0	0	0	0	0	0	0	0	0	0	0	0	0	0	0	0	0	0	0	0	0	1.34335	1.58884	1.58143	1.57328	1.56437	1.55471	1.5443	1.53314	1.52122	1.50855	1.49513	1.48096	2.03654	2.60464	3.18526	3.77839	4.38404	5.0022	5.63288	6.27607	6.93178	7.6	7.632
68	0	0	0	0	0	0	0	0	0	0	0	0	0	0	0	0	0	0	0	0	0	0	0	0	0	0	0	0.420586	0.487182	0.555384	0.625191	0.696603	0.769619	0.844241	0.920467	0.998299	1.07774	1.15878	1.31317	1.47083	1.63177	1.79598	1.96347	2.13423	2.30826	2.48557	2.66615	2.85	13.833
70	0	0	0	0	0	0	0	0	0	0	0	0	0	0	0	0	0	0	0	0	0	0	0	0	0	0	0	0.0678831	0.0763413	0.0849982	0.0938539	0.102908	0.112162	0.121614	0.131264	0.141114	0.151162	0.161409	0.318977	0.480166	0.644974	0.813403	0.985452	1.16112	1.34041	1.52332	1.70985	1.9	1.59
72	0	0	0	0	0	0	0	0	0	0	0	0	0	0	0	0	0	0	0	0	0	0	0	0	0	0	0	0	0	0	0	0	0	0	0	0	0	0	0	0	0	0	0	0	0	0	0	0	0.0685059
76	0	0	0	0	0	0	0	0	0	0	0	0	0	0	0	0	0	0	0	0	0	0	0	0	0	0	0	0.012	0.015884	0.019866	0.023946	0.028124	0.0324	0.036774	0.041246	0.045816	0.050484	0.05525	0.08471	0.11484	0.14564	0.17711	0.20925	0.24206	0.27554	0.30969	0.34451	0.38	78.228
84	0	0	0	0	0	0	0	0	0	0	0	0	0	0	0	0	0	0	0	0	0	0	0	0	0	0	0	0	0	0	0	0	0	0	0	0	0	0	0	0	0	0	0	0	0	0	0	0	0
86	0	0	0	0	0	0	0	0	0	0	0	0	0	0	0	0	0	0	0	0	0	0	0	0	0	0	0	0	0	0	0	0	0	0	0	0	0	0	0	0	0	0	0	0	0	0	0	0	0
90	0	0	0	0	0	0	0	0	0	0	0	0	0	0	0	0	0	0	0	0	0	0	0	0	0	0	0	0	0	0	0	0	0	0	0	0	0	0	0	0	0	0	0	0	0	0	0	0	0
92	0	0	0	0	0	0	0	0	0	0	0	0	0	0	0	0	0	0	0	0	0	0	0	0	0	0	0	0	0	0	0	0	0	0	0	0	0	0	0	0	0	0	0	0	0	0	0	0	0
96	0	0	0	0	0	0	0	0	0	0	0	0	0	0	0	0	0	0	0	0	0	0	0	0	0	0	0	0	0	0	0	0	0	0	0	0	0	0	0	0	0	0	0	0	0	0	0	0	0
100	0	0	0	0	0	0	0	0	0	0	0	0	0	0	0	0	0	0	0	0	0	0	0	0	0	0	0	1.25717	1.42328	1.59333	1.76731	1.94522	2.12705	2.31282	2.50252	2.69615	2.89371	3.0952	5.39845	7.75442	10.1631	12.6245	15.1386	17.7055	20.325	22.9973	25.7223	28.5	38.2438
104	0	0	0	0	0	0	0	0	0	0.293834	0.632814	0.777931	0.937923	1.11279	1.30254	1.50716	1.72666	1.96104	2.2103	2.47443	2.75345	3.6278	4.57654	4.63974	5.77635	6.99481	8.20395	9.4875	11.0542	12.6588	14.3013	15.9817	17.7	19.4562	21.2503	23.0823	24.9522	26.86	46.7754	67.1466	87.9736	109.256	130.995	153.189	175.84	198.946	222.507	246.525	291.526
108	0	0	0	0	0	0	0	0	0	0	0	0	0	0	0	0	0	0	0	0	0	0	0	0	0	0	0	0	0	0	0	0	0	0	0	0	0	0	0	0	0	0	0	0	0	0	0	0	2.226
112	0	0	0	0	0	0	0	0	0	0	0	0	0	0	0	0	0	0	0	0	0	0	0	0	0	0	0	0.0969515	0.121595	0.146854	0.172727	0.199214	0.226316	0.254033	0.282364	0.311309	0.340869	0.371044	0.756721	1.15127	1.55468	1.96696	2.38811	2.81812	3.25701	3.70476	4.16137	4.62686	6.82928
116	0	0	0	0	0	0	0	0	0	0	0	0	0	0	0	0	0	0	0	0	0	0	0	0	0	0	0	0.443151	0.562019	0.683859	0.808672	0.936458	1.06722	1.20095	1.33765	1.47733	1.61997	1.7656	2.68798	3.63133	4.59565	5.58094	6.58719	7.61442	8.66261	9.73176	10.8219	11.933	18.8308
120	0	0	0	0	0	0	0	0	0	0	0	0	0	0	0	0	0	0	0	0	0	0	0	0	0	0	0	0	0	0	0	0	0	0	0	0	0	0	0	0	0	0	0	0	0	0	0	0	0.318
124	0	0	0	0	0	0	0	0	0	0	0	0	0	0	0	0	0	0	0	0	0	0	0	0	0	0	0	0	0	0	0	0	0	0	0	0	0	0	2.7864	5.6376	8.5536	11.5344	14.58	17.6904	20.8656	24.1056	27.4104	30.78	64.3885
132	0	0	0	0	0	0	0	0	0	0	0	0	0	0	0	0	0	0	0	0	0	0	0	0	0	0	0	0	0	0	0	0	0	0	0	0	0	0	0	0	0	0	0	0	0	0	0	0	0.208301
136	0	0	0	0	0	0	0	0	0	0	0	0	0	0	0	0	0	0	0	0	0	0	0	0	0	0	0	0	0	0	0	0	0	0	0	0	0	0	0	0	0	0	0	0	0	0	0	0	0
140	0	0	0	0	0	0	0	0	0	0	0	0	0	0	0	0	0	0	0	0	0	0	0	0	0	0	0	0	0	0	0	0	0	0	0	0	0	0	0	0	0	0	0	0	0	0	0	0	0
144	0	0	0	0	0	0	0	0	0	0	0.159992	0.205571	0.255704	0.310021	0.368128	0.429593	0.49395	0.560686	0.629235	0.698964	0.769164	0.88838	1.00846	0.994332	0.96382	1.04154	1.29948	1.54371	1.66089	1.78062	1.90288	2.02769	2.15504	2.28493	2.41736	2.55234	2.68986	2.82992	9.198	15.7134	22.3761	29.1862	36.1435	43.2482	50.5002	57.8996	65.4462	73.1402	102.215
148	0	0	0	0	0	0	0	0	0	0	0	0	0	0	0	0	0	0	0	0	0	0	0	0	0	0	0	0.185888	0.220736	0.256435	0.292986	0.330389	0.368644	0.407751	0.447709	0.488519	0.530181	0.572695	0.595919	0.619526	0.643517	0.66789	0.692648	0.717788	0.743312	0.76922	0.795511	0.822185	1.65129
152	0	0	0	0	0	0	0	0	0	0	6.19559	7.30939	8.52111	9.83497	11.2546	12.7829	14.4213	16.1699	18.0265	19.9665	21.8983	24.633	27.3251	29.9184	32.3436	34.5122	34.0375	33.2535	38.4373	43.7458	49.179	54.737	60.4197	66.2272	72.1594	78.2164	84.3981	90.7046	121.122	152.223	184.006	216.471	249.62	283.45	317.963	353.159	389.038	425.599	357.406
156	0	0	0	0	0	0	5.12038	13.3076	30.4174	68.4392	227.5	257.408	287.978	319.21	351.103	383.658	416.875	450.754	485.294	597.426	646.723	697.658	750.231	804.443	860.294	1149.49	1234.58	1322.62	1502.55	1686.75	1875.21	2067.95	2264.96	2466.24	2671.79	2881.61	3095.7	3314.07	3946.63	4593.01	5253.19	5927.17	6614.96	7316.55	8031.94	8761.14	9504.14	10260.9	11963.9
158	0	0	0	0	0	0	0	0	0	0	0	0	0	0	0	0	0	0	0	0	0	0	0.95364	1.09115	1.2171	1.32424	1.27443	5.96821	7.60216	9.27702	10.9928	12.7494	14.547	16.3855	18.2649	20.1852	22.1463	24.1484	32.6793	41.4019	50.3164	59.4226	68.7206	78.2104	87.8919	97.7653	107.83	118.087	147.999
162	0	0	0	0	0	0	0	0	0	0	0	0	0	0	0	0	0	0	0	0	0	0	0	0	0	0	0	0	0	0	0	0	0	0	0	0	0	0	0	0	0	0	0	0	0	0	0	0	0
166	0	0	0	0	0	0	0	0	0	0	0	0	0	0	0	0	0	0	0	0	0	0	0	0	0	0	0	0	0	0	0	0	0	0	0	0	0	0	0	0	0	0	0	0	0	0	0	0	0
170	0	0	0	0	0	0	0	0	0	0	0	0	0	0	0	0	0	0.89095	0.984317	1.11568	1.2466	1.43805	1.62498	1.80216	1.9629	4.52491	3.57741	2.85	3.04	3.234	3.432	3.634	3.84	4.05	4.264	4.482	4.704	4.93	5.3492	5.7768	6.2128	6.6572	7.11	7.5712	8.0408	8.5188	9.0052	9.5	43.884
174	0	0	0	0	0	0	0	0	0	0	0	0	0	0	0	0	0	0	0	0	0	0	0	0	0	0	0	0	0	0	0	0	0	0	0	0	0	0	0	0	0	0	0	0	0	0	0	0	0
175	0	0	0	0	0	0	0	0	0	0	0	0	0	0	0	0	0	0	0	0	0	0	0	0	0	0	0	0	0	0	0	0	0	0	0	0	0	0	0	0	0	0	0	0	0	0	0	0	0
178	0	0	0	0	0	0	0	0	0	0	0	0	0	0	0	0	0	0	0	0	0	0	0	0	0	0	0	0	0	0	0	0	0	0	0	0	0	0	0	0	0	0	0	0	0	0	0	0	0
180	0	0	0	0	0	0	0	0	0	0	0	0	0	0	0	0	0	0	0	0	0	0	0	0	0	0	0	0	0	0	0	0	0	0	0	0	0	0	0	0	0	0	0	0	0	0	0	0	0
184	0	0	0	0	0	0	0	0	0	0	0	0	0	0	0	0	0	0	0	0	0	0	0	0	0	0	0	0	0	0	0	0	0	0	0	0	0	0	0	0	0	0	0	0	0	0	0	0	0
188	0	0	0	0	0	0	0	0	0	0	0	0	0	0	0	0	0	0	0	0	0	0	0	0	0	0	0	0.146494	0.178189	0.210666	0.243927	0.27797	0.312796	0.348404	0.384795	0.421969	0.459925	0.498665	1.32302	2.16641	3.02884	3.9103	4.8108	5.73033	6.6689	7.6265	8.60313	9.5988	12.1667
191	0	0	0	0	0	0	0	0	0	0	0	0	0	0	0	0	0	0	0	0	0	0	0	0	0	0	0	0.0705197	0.0787926	0.0872585	0.0959173	0.104769	0.113814	0.123052	0.132482	0.142106	0.151923	0.161932	0.319454	0.480594	0.645353	0.813732	0.985729	1.16135	1.34058	1.52343	1.70991	1.9	1.59
192	0	0	0	0	0	0	0	0	0	0	0	0	0	0	0	0	0	0	0	0	0	0	0	0	0	0	0	0.0728047	0.11175	0.151694	0.192638	0.234581	0.277523	0.321465	0.366406	0.412346	0.459286	0.507225	0.998139	1.50033	2.0138	2.53855	3.07457	3.62187	4.18045	4.75031	5.33145	5.92386	12.5586
196	0	0	0	0	0	0	0	0	0	0	0	0	0	0	0	0	0	0	0	0	0	0	0	0	0	0	0	0.864327	0.919924	0.97668	1.0346	1.09367	1.15391	1.2153	1.27786	1.34157	1.40645	1.47248	1.99907	2.5375	3.08777	3.64988	4.22384	4.80964	5.40729	6.01678	6.63811	7.27128	9.60108
203	0	0	0	0	0	0	0	0	0	0	0	0	0	0	0	0	0	0	0	0	0	0	0	0	0	0	0	0.133656	0.133859	0.13402	0.13414	0.134219	0.134255	0.134251	0.134205	0.134117	0.133987	0.133816	0.265656	0.400524	0.538422	0.67935	0.823307	0.970293	1.12031	1.27335	1.42943	1.58853	1.32935
204	0	0	0	0	0	0	0	0	0	0	0	0	0	0	0	0	0	0	0	0	0	0	0	0	0	0	0	0	0	0	0	0	0	0	0	0	0	0	0	0	0	0	0	0	0	0	0	0	0
208	0	0	0	0	0	0	0	0	0	0	0	0	0	0	0	0	0	0	0	0	0	0	0	0	0	0	0	0.151833	0.165316	0.179101	0.193187	0.207575	0.222265	0.237256	0.252548	0.268143	0.284038	0.300235	0.664418	1.03699	1.41795	1.80729	2.20502	2.61114	3.02565	3.44854	3.87982	4.31949	6.50652
212	0	0	0	0	0	0	0	0	0	0	0	0	0	0	0	0	0	0	0	0	0	0	0	0	0	0	0	0	0	0	0	0	0	0	0	0	0	0	0	0	0	0	0	0	0	0	0	0	0
214	0	0	0	0	0	0	0	0	0	0	0	0	0	0	0	0	0	0	0	0	0	0	0	0	0	0	0	0.027826	0.0312012	0.0346554	0.0381887	0.0418011	0.0454925	0.0492629	0.0531125	0.057041	0.0610487	0.0651353	0.142417	0.221478	0.302318	0.384938	0.469338	0.555516	0.643475	0.733212	0.824729	0.918026	17.6696
218	0	0	0	0	0	0	0	0	0	0	0	0	0	0	0	0	0	0	0	0	0	0	0	0	0	0	0	0.139516	0.140762	0.141993	0.143207	0.144405	0.145587	0.146753	0.147902	0.149036	0.150153	0.151254	0.16254	0.174047	0.185774	0.197723	0.209893	0.222284	0.234896	0.247729	0.260783	0.274059	50.685
222	0	0	0	0	0	0	0	0	0	0	0	0	0	0	0	0	0	0	0	0	0	0	0	0	0	0	0	0.0113974	0.0139795	0.0166256	0.0193356	0.0221096	0.0249475	0.0278494	0.0308152	0.033845	0.0369387	0.0400964	0.0909393	0.142954	0.196139	0.250496	0.306025	0.362725	0.420596	0.479639	0.539854	0.601239	2.31445
226	0	0	0	0	0	0	0	0	0	0	0	0	0	0	0	0	0	0	0	0	0	0	0	0	0	0	0	0	0	0	0	0	0	0	0	0	0	0	0	0	0	0	0	0	0	0	0	0	0
231	0	0	0	0	0	0	0	0	0	0	0	0	0	0	0	0	0	0.852976	1.10992	1.17685	1.24374	1.31059	1.37741	1.44418	1.51092	1.57762	1.64427	1.71089	1.92929	2.15283	2.38151	2.61535	2.85433	3.09845	3.34773	3.60215	3.86172	4.12643	5.47748	6.85882	8.27045	9.71237	11.1846	12.6871	14.2199	15.783	17.3763	19	38.1395
232	0	0	0	0	0	0	0	0	0	0	0	0	0	0	0	0	0	0	0	0	0	0	0	0	0	0	0	0.17929	0.209962	0.241379	0.27354	0.306446	0.340096	0.37449	0.409628	0.44551	0.482137	0.519508	0.553661	0.588465	0.623922	0.660031	0.696792	0.734204	0.77227	0.810987	0.850356	0.890377	1.75136
233	0	0	0	0	0	0	0	0	0	0	0	0	0	0	0	0	0	0	0	0	0	0	0	0	0	0	0	0	0	0	0	0	0	0	0	0	0	0	0	0	0	0	0	0	0	0	0	0	0.134735
234	0	0	0	0	0	0	0	0	0	0	0	0	0	0	0	0	0	0	0	0	0	0	0	0	0	0	0	0	0	0	0	0	0	0	0	0	0	0	0	0	0	0	0	0	0	0	0	0	0
238	0	0	0	0	0	0	0	0	0	0	0	0	0	0	0	0	0	0	0	0	0	0	0	0	0	0	0	0	0	0	0	0	0	0	0	0	0	0	0	0	0	0	0	0	0	0	0	0	0
242	0	0	0	0	0	0	0	0	0	0	0	0	0	0	0	0	0	0	0	0	0	0	0	0	0	0	0	0	0	0	0	0	0	0	0	0	0	0	0	0	0	0	0	0	0	0	0	0	0.159
246	0	0	0	0	0	0	0	0	0	0	0	0	0	0	0	0	0	0	0	0	0	0	0	0	0	0	0	0	0	0	0	0	0	0	0	0	0	0	0	0	0	0	0	0	0	0	0	0	0
250	0	0	0	0	0	0	0	0	0	0	1.29627	1.65037	2.03933	1.95435	1.82611	1.85023	1.85765	2.06515	2.27731	2.72882	3.19884	3.93527	5.47214	8.52034	5.95643	8.17881	10.0633	11.8093	12.8664	13.947	15.0514	16.1794	17.3311	18.5065	19.7055	20.9282	22.1746	23.4447	38.5485	53.9971	69.7905	85.9288	102.412	119.24	136.413	153.93	171.793	190	205.689
254	0	0	0	0	0	0	0	0	0	0	0	0	0	0	0	0	0	0	0	0	0	0	0	0	0	0	0	0	0	0	0	0	0	0	0	0	0	0	0	0	0	0	0	0	0	0	0	0	0.158035
258	0	0	0	0	0	0	0	0	0	0	0	0	0	0	0	0	0	0	0	0	0	0	0	0	0	0	0	0	0	0	0	0	0	0	0	0	0	0	0	0	0	0	0	0	0	0	0	0	0
262	0	0	0	0	0	0	0	0	0	0	0	0	0	0	0	0	0	0	0	0	0	0	0	0	0	0	0	0	0	0	0	0	0	0	0	0	0	0	0	0	0	0	0	0	0	0	0	0	0.0609605
266	0	0	0	0	0	0	0	0	0	0	0	0	0	0	0	0	0	0	0	0	0	0	0	0	0	0	0	0	0	0	0	0	0	0	0	0	0	0	0	0	0	0	0	0	0	0	0	0	0.636
268	0	0	0	0	0	0	0	0	0	0	0.243699	0.286781	0.333418	0.383712	0.437724	0.495464	0.556873	0.621796	0.689949	0.750182	0.808294	1.23209	1.65753	2.07532	1.6438	2.01228	2.31907	2.53034	2.81595	3.10819	3.40705	3.71255	4.02467	4.34342	4.6688	5.00081	5.33944	5.68471	7.82397	10.0114	12.2471	14.5309	16.863	19.2432	21.6716	24.1482	26.6731	29.2461	35.4593
270	0	0	0	0	0	0	0	0	0	0	0	0	0	0	0	0	0	0	0	0	0	0	0	0	0	0	0	0.799814	0.780494	0.760384	0.739486	0.717798	0.695321	0.672055	0.648	0.623156	0.597523	0.571101	0.576064	0.580986	0.585867	0.590707	0.595507	0.600266	0.604984	0.609661	0.614297	0.618893	0.621498
275	0	0	0	0	0	0	0	0	0	0	0	0	0	0	0	0	0	0	0	0	0	0	0	0	0	0	0	0.0560866	0.0727863	0.0899059	0.107445	0.125404	0.143783	0.162582	0.1818	0.201438	0.221496	0.241974	0.302209	0.363779	0.426683	0.490921	0.556495	0.623403	0.691645	0.761222	0.832134	0.90438	3.06578
276	0	0	0	0	0	0	0	0	0	0	0	0	0	0	0	0	0	0	0	0	0.743816	1.25444	2.14299	2.76619	1.53789	2.07866	2.36413	2.25557	2.61982	2.99286	3.3747	3.76533	4.16476	4.57298	4.98999	5.4158	5.8504	6.2938	13.4711	20.8135	28.3212	35.994	43.832	51.8352	60.0036	68.3372	76.836	85.5	94.7665
288	0	0	0	0	0	0	0	0	0	0	0	0	0	0	0	0	0	0	0	0	0	0	0	0	0	0	0	0.947167	1.00146	1.05684	1.11332	1.1709	1.22957	1.28935	1.35021	1.41218	1.47523	1.53939	1.565	1.59079	1.61676	1.6429	1.66921	1.6957	1.72236	1.74919	1.7762	1.80339	2.41464
292	0	0	0	0	0	0	0	0	0	0	0	0	0	0	0	0	0	0	0	0	0	0	0	0	0	0	0	0	0	0	0	0	0	0	0	0	0	0	0	0	0	0	0	0	0	0	0	0	0
296	0	0	0	0	0	0	0	0	0	0	0	0	0	0	0	0	0	0	0	0	0	0	0	0	0	0	0	0	0	0	0	0	0	0	0	0	0	0	0	0	0	0	0	0	0	0	0	0	0
300	0	0	0	0	0	0	0	0	0	0	1.13873	1.2727	1.40666	1.34805	1.25595	1.03993	0.777014	0.882514	0.994712	1.11361	1.2392	1.41068	1.60661	1.80019	1.35643	1.57412	2.46166	2.56214	2.85768	3.16011	3.46941	3.7856	4.10866	4.4386	4.77542	5.11911	5.46969	5.82714	12.0213	18.3579	24.8369	31.4584	38.2224	45.1288	52.1776	59.3689	66.7027	74.179	115.461
304	0	0	0	0	0	0	0	0	0	0	0	0	0	0	0	0	0	0	0	0	0	0	0	0	0	0	0	0	0	0	0	0	0	0	0	0	0	0	0	0	0	0	0	0	0	0	0	0	0
308	0	0	0	0	0	0	0	0	0	0	0	0	0	0	0	0	0	0	0	0	0	0	0	0	0	0	0	0	0	0	0	0	0	0	0	0	0	0	0	0	0	0	0	0	0	0	0	0	0
312	0	0	0	0	0	0	0	0	0	0	0	0	0	0	0	0	0	0	0	0	0	0	0	0	0	0	0	0	0	0	0	0	0	0	0	0	0	0	0	0	0	0	0	0	0	0	0	0	0.0858624
316	0	0	0	0	0	0	0	0	0	0	0	0	0	0	0	0	0	0	0	0	0	0	0	0	0	0	0	0	0	0	0	0	0	0	0	0	0	0	0	0	0	0	0	0	0	0	0	0	0
320	0	0	0	0	0	0	0	0	0	0	0	0	0	0	0	0	0	0	0.739657	1.14412	1.56392	1.6999	1.82864	1.94632	2.04797	2.12694	1.55264	1.72823	1.78696	1.84664	1.90725	1.9688	2.03128	2.09471	2.15908	2.22439	2.29063	2.35782	3.61949	4.90986	6.22893	7.5767	8.95316	10.3583	11.7922	13.2547	14.746	16.2659	18.7
324	0	0	0	0	0	0	0	0	0	0	0	0	0	0	0	0	0	0	0	0	0	1.07846	1.28884	1.53648	1.82756	2.1693	2.57002	3.0394	3.14093	3.24405	3.34878	3.45512	3.56306	3.67261	3.78376	3.89652	4.01088	4.12685	4.18786	4.24916	4.31075	4.37263	4.4348	4.49726	4.56001	4.62305	4.68638	4.75	7.155
328	0	0	0	0	0	0	0	0	0	0	0	0.482861	0.657087	0.885428	1.18316	1.56951	2.06859	2.71044	3.53234	4.58021	5.91017	6.67931	7.45058	8.84457	10.2318	11.5858	11.5865	12.7463	13.5915	14.4545	15.3352	16.2338	17.15	18.0841	19.0359	20.0055	20.9928	21.998	22.4675	22.9419	23.4212	23.9054	24.3945	24.8885	25.3874	25.8912	26.3999	26.9135	36.8323
332	0	0	0	0	0	0	0	0	0	0	0	0	0	0	0	0	0	0	0	0	0	0	0	0	0	0	0	0.0300897	0.0664971	0.103852	0.142154	0.181404	0.221602	0.262747	0.304839	0.347879	0.391867	0.436802	0.828474	1.22913	1.63878	2.05742	2.48505	2.92167	3.36727	3.82187	4.28545	4.75803	7.96343
334	0	0	0	0	0	0	0	0	0	0	0	0	0	0	0	0	0	0	0	0	0	0	0	0	0	0	0	0	0	0	0	0	0	0	0	0	0	0	0	0	0	0	0	0	0	0	0	0	0
336	0	0	0	0	0	0	0	0	0	0	0	0	0	0	0	0	0	0	0	0	0	0	0	0	0	0	0	0	0	0	0	0	0	0	0	0	0	0	0	0	0	0	0	0	0	0	0	0	0
340	0	0	0	0	0	0	0	0	0	0	0	0	0	0	0	0	0	0	0	0	0	0	0	0	0	0	0	0.208986	0.231684	0.254906	0.278651	0.302921	0.327715	0.353032	0.378874	0.405239	0.432129	0.459542	0.978607	1.50962	2.05257	2.60748	3.17432	3.75312	4.34385	4.94654	5.56117	6.18774	11.1507
0	0	0	0	0	0	0	0	0	0	0	0	0	0	0	0	0	0	0	0	0	0	0	0	0	0	0	0	0	0	0	0	0	0	0	0	0	0	0	0	0	0	0	0	0	0	0	0	0	0
348	0	0	0	0	0	0	0	0	0	0	0	0	0	0	0	0	0	0	0	0	0	0	0	0	0	0	0	0.148469	0.18403	0.220475	0.257803	0.296016	0.335112	0.375091	0.415955	0.457702	0.500333	0.543848	1.10996	1.68909	2.28123	2.88639	3.50457	4.13576	4.77998	5.4372	6.10745	6.79071	13.2408
352	0	0	0	0	0	0	0	0	0	0	0	0	0	0	0	0	0	0	0	0	0	0	0	0	0	0	0	0	0	0	0	0	0	0	0	0	0	0	0	0	0	0	0	0	0	0	0	0	0
356	0	0	0	0	0	0	6.46843	13.5211	27.6866	55.807	111.099	118.526	124.764	129.871	133.91	136.954	139.075	140.349	140.852	140.658	139.839	138.465	136.601	134.311	131.652	128.679	125.444	145.071	189.394	234.833	281.387	329.057	377.842	427.742	478.758	530.89	584.137	638.5	1599.13	2581.92	3586.88	4614.01	5663.3	6734.76	7828.38	8944.17	10082.1	11242.2	13281.5
360	0	0	0	0	0	0	0	0	0	0	0	0.525326	0.697044	0.911423	1.17704	1.504	1.90415	2.3914	2.98202	3.69504	4.55267	5.92439	7.61226	9.67707	14.3468	19.1752	22.6818	27.0615	32.7736	38.6266	44.6203	50.7549	57.0304	63.4466	70.0037	76.7016	83.5403	90.5198	168.426	248.12	329.6	412.868	497.922	584.764	673.392	763.808	856.01	950	1415.1
364	0	0	0	0	0.135369	0.9578	6.03414	7.58065	6.45926	7.15487	11.9248	13.59	15.2846	17.0011	18.732	20.4701	22.2079	21.0809	19.7208	21.3793	23.036	24.9445	26.8452	19.1513	20.849	22.5316	28.4562	27.0615	31.7997	34.9977	38.2679	41.6103	45.0249	48.5117	52.0707	55.7019	59.4053	63.1809	83.3318	103.934	124.988	146.492	168.449	190.856	213.715	237.025	260.787	285	985.8
368	0	0	0	0.0673027	0.152646	1.04077	11.2403	16.4746	18.8967	24.2958	16.1972	18.5448	20.9366	22.3432	23.6477	23.7205	23.5911	42.8722	63.2821	58.5775	53.3263	47.5983	38.0078	27.9922	28.2495	28.4139	35.6068	19.4229	30.5023	32.5842	34.7096	36.8788	39.0916	41.348	43.6481	45.9918	48.3792	50.8102	71.1562	91.9615	113.226	134.95	157.133	179.775	202.877	226.438	250.458	274.937	372.728
372	0	0	0	0	0	0	0	0	0	0	0	0	0	0	0	0	0	0	0	0	0	0	0	0	0	0	0	0	0	0	0	0	0	0	0	0	0	0	0	0	0	0	0	0	0	0	0	0	0
376	0	0	0	0	0	0	0	0	0	0	0	0	0	0	0	0	0	0	0	0	0	0	0	0	0	0	0	1.12688	1.33873	1.55575	1.77795	2.00534	2.2379	2.47564	2.71856	2.96667	3.21995	3.47841	4.23227	5.00272	5.78975	6.59336	7.41354	8.25031	9.10366	9.97359	10.8601	11.7632	27.6942
380	0	0	0	0	0	0	0	0	0	0	0	1.32275	20.9336	20.6264	20.0668	14.0663	7.4574	11.3986	15.5092	17.8125	20.9379	26.5208	35.0492	51.9465	33.7024	38.1397	56.3403	57.4279	63.9959	70.7166	77.59	84.616	91.7948	99.1262	106.61	114.247	122.037	129.979	230.212	332.74	437.564	544.683	654.098	765.808	879.814	996.115	1114.71	1235.6	1574.71
384	0	0	0	0	0	0	0	0	0	0	0	0	0	0	0	0	0	0	0	0	0	0	0	0	0	0	0	0.108516	0.125737	0.143373	0.161424	0.17989	0.198772	0.218068	0.23778	0.257907	0.278449	0.299406	0.351755	0.40524	0.459861	0.515617	0.572509	0.630536	0.689699	0.749997	0.811431	0.874	1.31652
388	0	0	0	0	0	0	0	0	0	0	0	0	0	0	0	0	0	0	0	0	0	0	0	0	0	0	0	0.115293	0.180862	0.248116	0.317056	0.38768	0.459989	0.533984	0.609663	0.687028	0.766077	0.846812	1.32838	1.82091	2.32441	2.83888	3.36431	3.90071	4.44808	5.00642	5.57573	6.156	8.6496
392	0	0	0	0	0	0	0	0	0	0	0	2.64927	4.02919	6.80939	9.90031	15.7138	22.0185	33.1729	43.1604	57.0716	60.3329	65.7139	55.8436	64.171	81.73	107.069	144.847	219.043	243.172	267.86	293.106	318.91	345.272	372.192	399.671	427.707	456.302	485.455	660.812	840.114	1023.36	1210.55	1401.69	1596.78	1795.8	1998.78	2205.7	2416.56	2459.45
398	0	0	0	0	0	0	0	0	0	0	0	0	0	0	0	0	0	0	0.723491	0.959174	1.26748	1.66999	2.19454	2.87699	3.7635	4.91346	6.40318	8.33066	11.6828	15.1202	18.643	22.251	25.9443	29.7229	33.5868	37.536	41.5704	45.6902	106.7	169.115	232.937	298.166	364.8	432.841	502.288	573.142	645.402	719.068	740.351
400	0	0	0	0	0	0	0	0	0	0	0	0	0	0	0	0	0	0	0	0	0	0	0	0	0	0	0	0.787646	0.846812	0.907258	0.968985	1.03199	1.09628	1.16185	1.2287	1.29683	1.36624	1.43693	2.09374	2.76543	3.452	4.15345	4.86978	5.60099	6.34708	7.10806	7.88392	8.67466	11.7601
404	0	0	0	0	0	0	0	0	0	0	0	0	0	0	0	0	0	0	0	0	0	0	0	0	0	0	0	0.678902	0.813625	0.951656	1.09299	1.23764	1.38559	1.53685	1.69142	1.84929	2.01047	2.17496	2.38469	2.59871	2.81701	3.03959	3.26645	3.4976	3.73303	3.97274	4.21673	4.46501	5.82895
408	0	0	0	0	0	0	0	0	0	0	0	0.503996	0.700006	0.96245	1.31179	1.7742	2.38297	3.18008	4.21795	4.89047	5.56685	6.80147	9.17196	6.9056	8.0169	9.01759	10.9318	12.9661	16.3899	19.8992	23.4941	27.1745	30.9404	34.792	38.729	42.7516	46.8598	51.0535	63.7155	76.658	89.881	103.384	117.168	131.233	145.578	160.203	175.109	190.296	232.268
410	0	0	0	0	0	0	0	0	0	0	0	0	0.540906	0.798606	1.16875	1.69719	2.44721	3.50559	4.99032	5.77859	6.5677	8.00919	10.7751	8.08789	9.35115	10.4579	12.5673	14.686	19.4061	24.2453	29.2036	34.2809	39.4773	44.7927	50.2272	55.7808	61.4534	67.2451	85.6231	104.41	123.606	143.211	163.225	183.648	204.48	225.721	247.371	269.43	328.82
414	0	0	0	0	0	0	0	0	0	0	0	0	0	0	0	0	0	0	0	0	0	0	0	0	0	0	0	0.107765	0.115916	0.124243	0.132746	0.141427	0.150284	0.159318	0.168528	0.177915	0.187479	0.197219	0.228004	0.25945	0.291558	0.324328	0.35776	0.391854	0.42661	0.462028	0.498108	0.53485	0.447585
417	0	0	0	0	0	0	0	0	0	0	0	3.13691	3.66557	4.24211	4.86927	5.54973	6.28604	7.08055	7.93532	8.62106	9.30912	10.3788	11.4618	12.5476	13.6246	14.6791	16.9679	19.2166	23.5204	27.9308	32.4476	37.071	41.8008	46.6372	51.5801	56.6296	61.7855	67.0479	89.7588	112.98	136.71	160.95	185.701	210.96	236.73	263.01	289.799	317.098	343.881
418	0	0	0	0	0	0	0	0	0	0	0	0	0	0	0	0	0	0	0	0	0	0	0	0	0	0	0	0.186917	0.212935	0.239571	0.266827	0.294702	0.323196	0.352309	0.382041	0.412392	0.443363	0.474952	0.70414	0.938527	1.17812	1.4229	1.67289	1.92808	2.18847	2.45405	2.72484	3.00083	4.18537
422	0	0	0	0	0	0	0	0	0	0	1.29917	1.62512	2.0084	2.45692	2.33162	2.19554	2.05286	1.9069	1.76025	1.70528	1.63535	1.75493	1.86462	1.96012	1.5526	1.628	1.82805	1.46382	1.51797	1.57303	1.629	1.68589	1.74369	1.8024	1.86202	1.92255	1.98399	2.04635	2.68195	3.33178	3.99583	4.67411	5.3666	6.07332	6.79426	7.52942	8.2788	9.0424	13.208
426	0	0	0	0	0	0	0	0	0	0	0	0	0	0	0	0	0	0	0	0	0	0	0	0	0	0	0	0	0	0	0	0	0	0	0	0	0	0	0	0	0	0	0	0	0	0	0	0	0.0403829
428	0	0	0	0	0	0	0	0	0	0	0	0	0	0	0	0	0	0	0	0	0	0	0	0	0	0	0	0	0	0	0	0	0	0	0	0	0	0	0	0	0	0	0	0	0	0	0	0	0.024752
430	0	0	0	0	0	0	0	0	0	0	0	0	0	0	0	0	0	0	0	0	0	0	0	0	0	0	0	0	0	0	0	0	0	0	0	0	0	0	0	0	0	0	0	0	0	0	0	0	0
434	0	0	0	0	0	0	0	0	0	0	2.03802	2.59088	3.21661	3.205	3.12979	3.5868	4.07827	4.605	5.16778	5.65205	6.15834	4.58914	2.78405	4.42258	6.23075	8.21255	8.6433	9.08068	10.1905	11.3264	12.4882	13.6761	14.89	16.13	17.3959	18.6879	20.0059	21.3499	22.8809	24.4418	26.0324	27.6527	29.3029	30.9828	32.6924	34.4319	36.201	38	44.7352
438	0	0	0	0	0	0	0	0	0	0	0	0	0	0	0	0	0	0	0	0	0	0	0	0	0	0	0	0	0	0	0	0	0	0	0	0	0	0	0	0	0	0	0	0	0	0	0	0	0
440	0	0	0	0	0	0	0	0	0	0	0	0	0	0	0	0	0	0	0	0	0	0	0	0	0	0	0	0	0	0	0	0	0	0	0	0	0	0	0	0	0	0	0	0	0	0	0	0	0.121292
442	0	0	0	0	0	0	0	0	0	0	0	0	0	0	0	0	0	0	0	0	0	0	0	0	0	0	0	0	0	0	0	0	0	0	0	0	0	0	0	0	0	0	0	0	0	0	0	0	0
446	0	0	0	0	0	0	0	0	0	0	0	0	0	0	0	0	0	0	0	0	0	0	0	0	0	0	0	0	0	0	0	0	0	0	0	0	0	0	0	0	0	0	0	0	0	0	0	0	0
450	0	0	0	0	0	0	0	0	0	0	0	0	0	0	0	0	0	0	0	0	0	0	0	0	0	1.24147	1.56873	1.91731	2.26168	2.61444	2.97559	3.34513	3.72306	4.10938	4.50408	4.90718	5.31867	5.73855	6.08102	6.42989	6.78515	7.14681	7.51486	7.8893	8.27014	8.65738	9.051	9.45103	55.3631
454	0	0	0	0	0	0	0	0	0	0	0	0	0	0	0	0	0	0	0	0	0	0	0	0	0	0	0	0	0	0	0	0	0	0	0	0	0	0	0	0	0	0	0	0	0	0	0	0	0.152639
458	0	0	0	0	0	0	0	0	0	0	0	0	0	0	0	0	0	0	0	0	0	1.10693	1.35438	1.62045	1.90511	2.20837	2.87792	3.59445	4.22157	4.86393	5.52154	6.19439	6.88248	7.58581	8.30438	9.0382	9.78726	10.5516	18.2081	26.0399	34.0468	42.2289	50.5861	59.1185	67.8262	76.7089	85.7669	95	115.752
462	0	0	0	0	0	0	0	0	0	0	0	0	0	0	0	0	0	0	0	0	0	0	0	0	0	0	0	0	0	0	0	0	0	0	0	0	0	0	0	0	0	0	0	0	0	0	0	0	0
466	0	0	0	0	0	0	0	0	0	0	0	0	0	0	0	0	0	0	0	0	0	0	0	0.909098	1.0506	1.18094	1.42724	1.68668	1.96734	2.2548	2.54905	2.85009	3.15793	3.47256	3.79398	4.1222	4.45721	4.79902	5.01493	5.23455	5.45787	5.68491	5.91565	6.1501	6.38826	6.63013	6.87571	7.12499	13.1175
470	0	0	0	0	0	0	0	0	0	0	0	0	0	0	0	0	0	0	0	0	0	0	0	0	0	0	0	0.0072041	0.00803405	0.00888331	0.00975188	0.0106398	0.011547	0.0124735	0.0134193	0.0143844	0.0153689	0.0163727	0.0308375	0.0456342	0.0607628	0.0762233	0.0920157	0.10814	0.124596	0.141384	0.158505	0.175957	0.294496
474	0	0	0	0	0	0	0	0	0	0	0	0	0	0	0	0	0	0	0	0	0	0	0	0	0	0	0	0.0175237	0.0274877	0.0377078	0.048184	0.0589162	0.0699046	0.0811489	0.0926494	0.104406	0.116418	0.128687	0.190929	0.254583	0.31965	0.386129	0.45402	0.523323	0.594039	0.666167	0.739707	0.81466	0.81809
478	0	0	0	0	0	0	0	0	0	0	0	0	0	0	0	0	0	0	0	0	0	0	0	1.25785	1.42582	1.58927	1.9187	2.26498	2.63114	3.00614	3.38997	3.78265	4.18417	4.59453	5.01374	5.44178	5.87866	6.32439	6.61891	6.91856	7.22332	7.5332	7.8482	8.16833	8.49357	8.82392	9.1594	9.5	9.5636
480	0	0	0	0	0	0	0	0	0	0	0	0	0	0	0	0	0	0	0	0	0	0	0	0	0	0	0	0.00241723	0	0	0	0	0	0	0	0	0	0.0471906	0	0	0	0	0	0	0	0	0	0.248611	0
484	0	0	0	0	0	0	0	0	0	0	13.3452	16.0541	19.0989	22.5152	26.3419	30.6217	35.4016	40.733	46.6722	58.195	71.0642	86.6218	103.85	122.833	143.656	166.41	7.08102	30.0807	36.5944	43.269	50.1044	57.1007	64.2578	71.5758	79.0547	86.6944	94.495	102.456	160.289	219.439	279.906	341.69	404.791	469.209	534.943	601.995	670.363	740.049	990.887
492	0	0	0	0	0	0	0	0	0	0	0	0	0	0	0	0	0	0	0	0	0	0	0	0	0	0	0	0	0	0	0	0	0	0	0	0	0	0	0	0	0	0	0	0	0	0	0	0	0
496	0	0	0	0	0	0	0	0	0	0	0	0	0	0	0	0	0	0	0	0	0	0	0	0	0	0	0	0.0892589	0.110565	0.132401	0.154766	0.17766	0.201084	0.225037	0.24952	0.274531	0.300073	0.326143	0.489488	0.656541	0.827305	1.00178	1.17996	1.36185	1.54745	1.73676	1.92978	2.12651	2.37274
498	0	0	0	0	0	0	0	0	0	0	0	0	0	0	0	0	0	0	0	0	0	0	0	0	0	0	0	0.506806	0.638531	0.773544	0.911846	1.05344	1.19832	1.34648	1.49794	1.65268	1.81072	1.97204	4.02314	6.12141	8.26683	10.4594	12.6992	14.9861	17.3201	19.7014	22.1298	24.6053	35.6452
500	0	0	0	0	0	0	0	0	0	0	0	0	0	0	0	0	0	0	0	0	0	0	0	0	0	0	0	0	0	0	0	0	0	0	0	0	0	0	0	0	0	0	0	0	0	0	0	0	0
504	0	0	0	0	0	0	0	0	0	0	2.0697	2.40853	2.76987	3.15425	3.56207	3.99365	4.44914	4.92852	5.43158	6.06793	6.70491	6.48379	6.22829	7.02572	6.33271	5.29281	7.93458	6.14599	7.49608	8.87953	10.2964	11.7466	13.2301	14.7471	16.2974	17.8811	19.4982	21.1486	25.5506	30.0491	34.6442	39.336	44.1243	49.0092	53.9907	59.0687	64.2434	69.5146	193.909
508	0	0	0	0	0	0	0	0	0	0	0	0	0	0	0	0	0	0	0	0	0.926539	1.42545	1.96566	2.54641	3.1669	3.82635	4.96045	6.16267	7.07274	8.00459	8.95824	9.93367	10.9309	11.9499	12.9907	14.0533	15.1376	16.2438	17.7154	19.2168	20.748	22.3089	23.8996	25.5202	27.1704	28.8505	30.5604	32.3	9.59925
512	0	0	0	0	0	0	0	0	0	0	0	0	0	0	0	0	0	0	0	0	0	0	0	0	0	0	0	0	0	0	0	0	0	0	0	0	0	0	1.72	3.48	5.28	7.12	9	10.92	12.88	14.88	16.92	19	19.08
516	0	0	0	0	0	0	0	0	0	0	0	0	0	0	0	0	0	0	0	0	0	0	0	0	0	0	0	0.0669214	0.0915278	0.116758	0.142613	0.169091	0.196194	0.223921	0.252272	0.281246	0.310845	0.341068	0.396573	0.453275	0.511174	0.570271	0.630566	0.692057	0.754747	0.818634	0.883718	0.95	1.431
520	0	0	0	0	0	0	0	0	0	0	0	0	0	0	0	0	0	0	0	0	0	0	0	0	0	0	0	0	0	0	0	0	0	0	0	0	0	0	0	0	0	0	0	0	0	0	0	0	0
524	0	0	0	0	0	0	0	0	0	0	0	0	0	0	0	0	0	0	0	0	0	0	0	0	0	0	0	0.519244	0.665053	0.814516	0.967633	1.12441	1.28483	1.44892	1.61665	1.78805	1.96309	2.14179	3.21449	4.31155	5.43297	6.57875	7.74889	8.94339	10.1623	11.4055	12.6731	13.965	22.8165
528	0	0	0	0	0	0	0	0	0	0	0	0	0	0	0	0	0	0	0	0	0	0	0	0	0.280593	0.443122	0.618422	0.806493	0.840985	0.876103	0.911845	0.948212	0.985203	1.02282	1.06106	1.09993	1.13942	1.17953	2.32188	3.49047	4.6853	5.90637	7.15369	8.42725	9.72706	11.0531	12.4054	13.7839	23.07
530	0	0	0	0	0	0	0	0	0	0	0	0	0	0	0	0	0	0	0	0	0	0	0	0	0	0	0	0	0	0	0	0	0	0	0	0	0	0	0	0	0	0	0	0	0	0	0	0	0
533	0	0	0	0	0	0	0	0	0	0	0	0	0	0	0	0	0	0	0	0	0	0	0	0	0	0	0	0	0	0	0	0	0	0	0	0	0	0	0	0	0	0	0	0	0	0	0	0	0
540	0	0	0	0	0	0	0	0	0	0	0	0	0	0	0	0	0	0	0	0	0	0	0	0	0	0	0	0	0	0	0	0	0	0	0	0	0	0	0	0	0	0	0	0	0	0	0	0	0.318
548	0	0	0	0	0	0	0	0	0	0	0	0	0	0	0	0	0	0	0	0	0	0	0	0	0	0	0	0	0	0	0	0	0	0	0	0	0	0	0	0	0	0	0	0	0	0	0	0	0
554	0	0	0	0	0	0	0	0	0	0	0	0	0	0	0	0	0	0	0	0	0	0	0	0	0	0	0	0	0	0	0	0	0	0	0	0	0	0	2.75909	5.58235	8.46978	11.4214	14.4371	17.517	20.6611	23.8694	27.1418	30.4784	35.5688
558	0	0	0	0	0	0	0	0	0	0	0	0	0	0	0	0	0	0	0	0	0	0	0	0	0	0	0	0.0507524	0.0603946	0.0702727	0.0803867	0.0907367	0.101323	0.112145	0.123202	0.134496	0.146026	0.157791	0.28699	0.41915	0.554272	0.692355	0.8334	0.977406	1.12437	1.2743	1.42719	1.58304	3.70932
562	0	0	0	0	0	0	0	0	0	0	0	0	0	0	0	0	0	0	0	0	0	0	0	0	0	0	0	0.40398	0.469152	0.535898	0.604216	0.674108	0.745573	0.818612	0.893224	0.969409	1.04717	1.1265	1.17899	1.23238	1.28669	1.34192	1.39805	1.4551	1.51306	1.57193	1.63172	1.69242	3.68234
566	0	0	0	0	0	0	0	0	0	0	0	0	0	0	0	0	0	0	0	0	0	0	0	0	0	0	0	0.679403	0.756578	0.835544	0.916304	0.998856	1.0832	1.16934	1.25727	1.34699	1.4385	1.53181	1.58747	1.644	1.70142	1.7597	1.81886	1.8789	1.93981	2.0016	2.06426	2.1278	25.5224
570	0	0	0	0	0	0	0	0	0	0	0	0	0	0	0	0	0	0	0	0	0	0	0	0	0	0	0	0	0	0	0	0	0	0	0	0	0	0	0	0	0	0	0	0	0	0	0	0	0
574	0	0	0	0	0	0	0	0	0	0	0	0	0	0	0	0	0	0	0	0	0	0	0	0	0	0	0	0	0	0	0	0	0	0	0	0	0	0	0	0	0	0	0	0	0	0	0	0	0
578	0	0	0	0	0	0	0	0	0	0	0	0	0	0	0	0	0	0	0	0	0	0	0	0	0	0	0	0	0	0	0	0	0	0	0	0	0	0	0	0	0	0	0	0	0	0	0	0	1.1706
580	0	0	0	0	0	0	0	0	0	0	0	0	0	0	0	0	0	0	0	0	0	0	0	0	0	0	0	0	0	0	0	0	0	0	0	0	0	0	0	0	0	0	0	0	0	0	0	0	0
583	0	0	0	0	0	0	0	0	0	0	0	0	0	0	0	0	0	0	0	0	0	0	0	0	0	0	0	0	0	0	0	0	0	0	0	0	0	0	0	0	0	0	0	0	0	0	0	0	0
584	0	0	0	0	0	0	0	0	0	0	0	0	0	0	0	0	0	0	0	0	0	0	0	0	0	0	0	0	0	0	0	0	0	0	0	0	0	0	0	0	0	0	0	0	0	0	0	0	0
585	0	0	0	0	0	0	0	0	0	0	0	0	0	0	0	0	0	0	0	0	0	0	0	0	0	0	0	0	0	0	0	0	0	0	0	0	0	0	0	0	0	0	0	0	0	0	0	0	0.477
586	0	0	0	0	0	0	15.4079	27.2362	47.1622	80.3902	135.337	147.619	158.485	169.937	179.916	188.421	195.479	210.451	223.487	241.55	257.19	256.049	253.886	242.064	260.814	263.449	324.597	378.01	433.462	490.241	548.346	607.778	668.537	730.622	794.034	858.772	924.837	992.229	1236.77	1486.72	1742.09	2002.87	2269.07	2540.68	2817.71	3100.16	3388.02	3681.29	4447.96
591	0	0	0	0	0	0	0	0	0	0	0	0	0	0	0	0	0	0	0	0	0	0	0	0	0	0	0	0.198424	0.227504	0.25728	0.287751	0.318918	0.350781	0.383339	0.416593	0.450542	0.485188	0.520528	0.962408	1.41442	1.87657	2.34885	2.83127	3.32382	3.8265	4.33932	4.86227	5.39535	6.30776
598	0	0	0	0	0	0	0	0	0	0	0	0	0	0	0	0	0	0	0	0	0	0	0	0	0	0	0	0	0	0	0	0	0	0	0	0	0	0	0	0	0	0	0	0	0	0	0	0	0
600	0	0	0	0	0	0	0	0	0	0	0	0	0	0	0	0	0	0	0	0	0	0	0	0	0	0	0	0	0	0	0	0	0	0	0	0	0	0	0	0	0	0	0	0	0	0	0	0	4.77
604	0	0	0	0	0	0	0	0	0	7.85026	9.1291	10.6346	12.2394	13.9438	15.7466	17.6448	19.6329	21.7027	23.8413	27.6134	31.3926	34.0402	36.5086	38.7083	40.5214	41.7828	13.0757	14.1489	14.2722	14.3938	14.5136	14.6317	14.7481	14.8628	14.9758	15.087	15.1965	15.3043	23.568	32.0197	40.6594	49.487	58.5027	67.7063	77.098	86.6776	96.4452	106.401	229.519
608	0	0	0	0	0	0	0	0	0	0	0	0	0	0	0	0	0	0	0	0	0	0	0	0	0	1.33583	2.22808	3.62319	5.15496	6.72577	8.33562	9.98451	11.6724	13.3994	15.1654	16.9705	18.8145	20.6977	51.4139	82.8387	114.972	147.815	181.365	215.625	250.593	286.27	322.656	359.75	410.764
612	0	0	0	0	0	0	0	0	0	0	0	0	0	0	0	0	0	0	0	0	0	0	0	0	0	0	0	0	0	0	0	0	0	0	0	0	0	0	0	0	0	0	0	0	0	0	0	0	0
616	0	0	0	0	0	0	0	0	0	0	0	0	0	0	0	0	0	0	0	0	0	0	0	0	0	0	0	0.124256	0.140872	0.157882	0.175286	0.193083	0.211273	0.229858	0.248836	0.268208	0.287973	0.308132	0.685644	1.07185	1.46675	1.87035	2.28264	2.70363	3.13331	3.57169	4.01876	4.47453	18.7224
620	0	0	0	0	0	0	0	0	0	0	0.979244	1.19565	1.29817	1.39528	1.48663	1.41465	1.32033	1.37746	1.42834	1.84044	2.26311	2.88104	3.49786	4.87912	3.49775	5.03556	7.79891	7.63388	8.60707	9.6032	10.6223	11.6642	12.7292	13.817	14.9278	16.0615	17.2182	18.3978	33.9528	49.8645	66.133	82.7581	99.74	117.079	134.774	152.826	171.235	190	222.882
624	0	0	0	0	0	0	0	0	0	0	0	0	0	0	0	0	0	0	0	0	0	0	0	0	0	0	0	1.00092	1.05814	1.11651	1.17604	1.23672	1.29855	1.36154	1.42568	1.49098	1.55743	1.62504	1.65174	1.67862	1.70567	1.73291	1.76031	1.7879	1.81566	1.8436	1.87171	1.9	4.293
626	0	0	0	0	0	0	0	0	0	0	0	0	0	0	0	0	0	0	0	0	0	0	0	0	0	0	0	0	0	0	0	0	0	0	0	0	0	0	0	0	0	0	0	0	0	0	0	0	0
630	0	0	0	0	0	0	0	0	0	0	0	0	0	0	0	0	0	0	0	0	0	0	0	0	0	0	0	0.00774192	0.0214113	0.0354376	0.049821	0.0645614	0.0796588	0.0951131	0.110925	0.127093	0.143618	0.160501	0.468859	0.784345	1.10696	1.4367	1.77357	2.11756	2.46868	2.82693	3.19231	3.56481	4.33918
634	0	0	0	0	0	0	0	0	0	0	0	0	0	0	0	0	0	0	0	0	0	0	0	0	0	0	0	0	0	0	0	0	0	0	0	0	0	0	0	0	0	0	0	0	0	0	0	0	0.0777115
638	0	0	0	0	0	0	0	0	0	0	0	0	0	0	0	0	0	0	0	0	0	0	0	0	0	0	0	0	0	0	0	0	0	0	0	0	0	0	0	0	0	0	0	0	0	0	0	0	0
642	0	0	0	0	0	0	0	0	0	0	0	0	0	0	0	0	0	0	0	0	0	0	0	0	0	0	0	0.0254296	0.0311185	0.0369482	0.0429186	0.0490299	0.0552819	0.0616747	0.0682084	0.0748828	0.0816979	0.0886539	0.169174	0.251542	0.335758	0.421822	0.509735	0.599496	0.691106	0.784564	0.87987	0.977024	4.18619
643	0	0	0	0	0	0	0	0	0	0	0	0	0	0	0	0	0	0	0	0	0	0.335844	0.5296	0.57483	0.601566	0.809469	1.05489	1.24434	1.57883	1.92169	2.27291	2.6325	3.00045	3.37677	3.76146	4.15451	4.55592	4.9657	7.51431	10.1208	12.7853	15.5076	18.2878	21.126	24.0221	26.9761	29.988	33.0578	166.982
646	0	0	0	0	0	0	0	0	0	0	0	0	0	0	0	0	0	0	0	0	0	0	0	0	0	0	0	0	0	0	0	0	0	0	0	0	0	0	0	0	0	0	0	0	0	0	0	0	0.636
654	0	0	0	0	0	0	0	0	0	0	0	0	0	0	0	0	0	0	0	0	0	0	0	0	0	0	0	0	0	0	0	0	0	0	0	0	0	0	0	0	0	0	0	0	0	0	0	0	0
659	0	0	0	0	0	0	0	0	0	0	0	0	0	0	0	0	0	0	0	0	0	0	0	0	0	0	0	0.00092595	0.00113061	0.00134034	0.00155512	0.00177497	0.00199988	0.00222985	0.00246488	0.00270497	0.00295012	0.00320033	0.00446219	0.00575251	0.0070713	0.00841856	0.00979429	0.0111985	0.0126312	0.0140923	0.0155819	0.0171	0.01431
660	0	0	0	0	0	0	0	0	0	0	0	0	0	0	0	0	0	0	0	0	0	0	0	0	0	0	0	0	0	0	0	0	0	0	0	0	0	0	0	0	0	0	0	0	0	0	0	0	0
662	0	0	0	0	0	0	0	0	0	0	0	0	0	0	0	0	0	0	0	0	0	0	0	0	0	0	0	0	0	0	0	0	0	0	0	0	0	0	0	0	0	0	0	0	0	0	0	0	0.159
666	0	0	0	0	0	0	0	0	0	0	0	0	0	0	0	0	0	0	0	0	0	0	0	0	0	0	0	0	0	0	0	0	0	0	0	0	0	0	0	0	0	0	0	0	0	0	0	0	0
670	0	0	0	0	0	0	0	0	0	0	0	0	0	0	0	0	0	0	0	0	0	0	0	0	0	0	0	0	0	0	0	0	0	0	0	0	0	0	0	0	0	0	0	0	0	0	0	0	0
674	0	0	0	0	0	0	0	0	0	0	0	0	0	0	0	0	0	0	0	0	0	0	0	0	0	0	0	0	0	0	0	0	0	0	0	0	0	0	0	0	0	0	0	0	0	0	0	0	0
678	0	0	0	0	0	0	0	0	0	0	0	0	0	0	0	0	0	0	0	0	0	0	0	0	0	0	0	0.160589	0.197735	0.235801	0.274789	0.314698	0.355528	0.397279	0.439951	0.483544	0.528059	0.573495	0.694217	0.817591	0.943615	1.07229	1.20361	1.33759	1.47422	1.61349	1.75542	1.9	3.18
682	0	0	0	0	0	0	0	0	0	0	0	0	0	0	0	0	0	0	0	0	0	0	0	0	0	0	0	0.229542	0.330528	0.434091	0.540231	0.648948	0.760242	0.874113	0.990561	1.10959	1.23119	1.35537	2.52418	3.71981	4.94224	6.19149	7.46755	8.77042	10.1001	11.4566	12.8399	14.25	66.462
686	0	0	0	0	0	0	0	0	0	0	0	0	0	0	0	0.745749	1.0039	1.34496	1.79435	2.38506	3.15981	4.17391	5.49888	7.22706	9.47764	12.4043	16.205	21.1346	21.8549	22.5867	23.33	24.0849	24.8513	25.6292	26.4187	27.2197	28.0323	28.8564	29.2863	29.7183	30.1524	30.5886	31.0269	31.4673	31.9098	32.3545	32.8012	33.25	38.955
690	0	0	0	0	0	0	0	0	0	0	0	0	0	0	0	0	0	0	0	0	0	0	0	0	0	0	0	0	0	0	0	0	0	0	0	0	0	0	0	0	0	0	0	0	0	0	0	0	0
694	0	0	0	0	0	0	0	0	0	0	0	0	0	0	0	0	0	0	0	0	0	0	0	0	0	0	0	0.0859358	0.0968622	0.108046	0.119487	0.131186	0.143142	0.155355	0.167826	0.180554	0.193539	0.206782	0.217585	0.228582	0.239774	0.251161	0.262743	0.274519	0.286489	0.298655	0.311015	0.323569	0.324932
702	0	0	0	0	0	0	0	0	0	0	0	0	0	0	0	0	0	0	0	0	0	0	0	0	0	0	0	0	0	0	0	0	0	0	0	0	0	0	0	0	0	0	0	0	0	0	0	0	0
703	0	0	0	0	0	0	0	0	0	0	0	0	0	0	0	0	0	0	0	0	0	0	0	0	0	0	0	0.00397868	0.00446004	0.00495267	0.00545657	0.00597174	0.00649818	0.0070359	0.00758488	0.00814514	0.00871666	0.00929946	0.0161323	0.0231215	0.0302671	0.037569	0.0450273	0.0526419	0.0604129	0.0683402	0.0764239	0.084664	0.0708504
704	0	0	0	0	0	0	0	0	0	0	0	0	0	0	0	0	0	0	0	0	1.0427	1.42814	1.84712	2.29968	2.78583	3.30558	4.30688	5.3782	7.40307	9.47933	11.607	13.786	16.0165	18.2984	20.6316	23.0163	25.4523	27.9398	51.2416	75.0777	99.4481	124.353	149.792	175.765	202.272	229.314	256.89	285	397.5
705	0	0	0	0	0	0	0	0	0	0	0	0	0	0	0	0	0	0	0	0	0	0	0	0	0	0	0	0.0155657	0.0174831	0.0194455	0.0214529	0.0235053	0.0256027	0.027745	0.0299324	0.0321648	0.0344422	0.0367645	0.0726262	0.109312	0.146821	0.185155	0.224312	0.264294	0.305099	0.346728	0.389181	0.432459	0.3619
706	0	0	0	0	0	0	0	0	0	0	0	0	0	0	0	0	0	0	0	0	0	0	0	0	0	0	0	0.39264	0.604768	0.822341	1.04536	1.27382	1.50773	1.74708	1.99187	2.24211	2.4978	2.75892	3.76999	4.80382	5.86041	6.93975	8.04186	9.16672	10.3143	11.4847	12.6779	13.8937	16.2776
710	0	0	0	0	0	0	0	0	0	0	0	0	0	0	0	0	0	0	0	0	0	0	0	0	0	0	1.29608	3.85424	4.66952	5.5049	6.36038	7.23596	8.13164	9.04743	9.98332	10.9393	11.9154	12.9116	46.5012	80.8683	116.013	151.936	188.636	226.113	264.368	303.401	343.212	383.8	449.652
716	0	0	0	0	0	0	0	0	0	0	0	0	0	0	0	0	0	0	0	0	0	0	0	0	0	0	0	0.419161	0.49194	0.566488	0.642803	0.720887	0.800739	0.882359	0.965747	1.0509	1.13783	1.22652	1.43505	1.6481	1.86567	2.08774	2.31433	2.54544	2.78106	3.02119	3.26584	3.515	5.43862
724	0	0	0	0	0	0	0	0	0	0	5.94892	7.06658	7.56603	8.00023	7.87244	7.57235	8.56914	9.63381	10.7672	11.9699	14.446	18.8732	27.4186	21.3545	26.723	36.8962	36.5595	43.3082	48.2633	53.3336	58.5191	63.8198	69.2357	74.7668	80.4131	86.1747	92.0514	98.0433	169.026	241.632	315.863	391.717	469.196	548.298	629.024	711.375	795.349	880.947	1024.73
732	0	0	0	0	0	0	0	0	0	0	0	0	0	0	0	0	0	0	0	0	0	0	0	0	0	0	0	0	0	0	0	0	0	0	0	0	0	0	0	0	0	0	0	0	0	0	0	0	0
736	0	0	0	0	0	0	0	0	0	0	3.04326	3.52423	4.03591	4.57985	5.15769	5.77115	6.42201	7.11213	7.84348	8.98163	10.1989	11.1364	12.1154	13.7993	15.5903	17.4888	19.648	21.9294	26.5081	31.1996	36.0039	40.9211	45.951	51.0937	56.3492	61.7175	67.1986	72.7925	83.484	94.4042	105.553	116.931	128.537	140.372	152.436	164.729	177.25	190	260.05
740	0	0	0	0	0	0	0	0	0	0	0	0	0	0	0	0	0	0	0	0	0	0	0	0	0	0	0	0.0511224	0.0583108	0.0656704	0.0732013	0.0809034	0.0887767	0.0968212	0.105037	0.113424	0.121982	0.130712	0.136225	0.14183	0.147528	0.153318	0.1592	0.165175	0.171243	0.177403	0.183655	0.19	0.159
744	0	0	0	0	0	0	0	0	0	0	0	0	0	0	0	0	0	0	0	0	0	0	0	0	0	0	0	0	0	0	0	0	0	0	0	0	0	0	0	0	0	0	0	0	0	0	0	0	0
748	0	0	0	0	0	0	0	0	0	0	0	0	0	0	0	0	0	0	0	0	0	0	0	0	0	0	0	0	0	0	0	0	0	0	0	0	0	0	0	0	0	0	0	0	0	0	0	0	5.15163
752	0	0	0	0	0	0	0	0	0	0	0	0	0	0	0	0	0	0	0	0	0	0	0	0	0	0	0	0	0	0	0	0	0	0	0	0	0	0	0	0	0	0	0	0	0	0	0	0	0.879912
756	0	0	0	0	0	0	0	0	0	0	0	0	0	0	0	0	0	0	0	0	0	0	0	0	0	0	0	0.682939	0.750354	0.819303	0.889787	0.961805	1.03536	1.11044	1.18707	1.26522	1.34491	1.42614	2.71809	4.0397	5.39097	6.77189	8.18247	9.6227	11.0926	12.5921	14.1213	15.6802	15.7462
760	0	0	0	0	0	0.00057845	1.49748	1.97534	1.94207	2.6218	3.27725	5.0092	7.57116	11.339	9.83066	8.46794	7.25371	6.18369	5.2493	10.2213	5.26843	5.90447	6.58118	7.29925	6.15126	6.93136	8.49226	8.94954	9.51872	10.0997	10.6926	11.2973	11.9138	12.5422	13.1824	13.8344	14.4983	15.1741	19.0852	23.0832	27.1679	31.3395	35.5979	39.943	44.375	48.8938	53.4994	58.1918	132.307
762	0	0	0	0	0	0	0	0	0	0	1.05884	1.24788	1.45322	1.67552	1.91533	2.17305	2.44889	2.74276	3.0542	3.31457	3.56951	3.81511	4.2153	4.59922	4.95624	5.27272	5.86562	6.35534	8.09528	9.87878	11.7058	13.5765	15.4906	17.4484	19.4496	21.4945	23.5829	25.7149	34.7991	44.0875	53.5802	63.2771	73.1782	83.2836	93.5931	104.107	114.825	125.747	155.233
764	0	0	0	0	0	0	0	0	0	0	0	0	0	0	0	0	0	0	0	0	0	0	0	0	0	0	0	0.640757	0.826783	1.01748	1.21285	1.41289	1.61759	1.82697	2.04102	2.25974	2.48313	2.7112	5.86053	9.08236	12.3767	15.7435	19.1828	22.6947	26.279	29.9358	33.6651	37.4669	234.653
768	0	0	0	0	0	0	0	0	0	0	0	0	0	0	0	0	0	0	0	0	0	0	0	0	0	0	0	0.33124	0.362926	0.395329	0.42845	0.462288	0.496844	0.532118	0.568109	0.604818	0.642244	0.680388	0.693514	0.706758	0.720121	0.733604	0.747206	0.760926	0.774766	0.788725	0.802803	0.817	0.82044
772	0	0	0	0	0	0	0	0	0	0	0	0	0	0	0	0	0	0	0	0	0	0	0	0	0	0	0	0	0	0	0	0	0	0	0	0	0	0	0	0	0	0	0	0	0	0	0	0	0
776	0	0	0	0	0	0	0	0	0	0	0	0	0	0	0	0	0	0	0	0	0	0	0	0	0	0	0	0	0	0	0	0	0	0	0	0	0	0	0	0	0	0	0	0	0	0	0	0	0
780	0	0	0	0	0	0	0	0	0	0	0	0	0	0	0	0	0	0	0	0	0	0	0	0	0	0	0	0	0	0	0	0	0	0	0	0	0	0	0	0	0	0	0	0	0	0	0	0	0.2703
784	0	0	0	0	0	0	0	0	0	0	0	0	0	0	0	0	0	0	0	0	0	0	0	0	0	0	0	1.12361	1.14888	1.17442	1.20023	1.22632	1.25267	1.27929	1.30619	1.33336	1.36079	1.3885	1.70939	2.03736	2.37242	2.71456	3.06378	3.42008	3.78347	4.15394	4.53149	4.91612	8.63575
788	0	0	0	0	0	0	0	0	0	0	4.69583	5.85585	7.13188	7.35862	7.51376	7.59899	7.61601	8.07097	10.1138	10.9123	11.7268	11.6376	12.7621	13.2628	11.0017	11.3841	14.6968	12.1217	13.5881	15.0888	16.6238	18.1932	19.7969	21.4349	23.1073	24.814	26.5551	28.3305	33.6808	39.1478	44.7314	50.4317	56.2487	62.1824	68.2328	74.3998	80.6835	87.0839	87.026
792	0	0	0	0.0413669	0.165468	1.30995	2.57572	4.08978	8.97993	14.3882	19.8184	23.7764	28.0282	28.2151	28.0047	27.4073	26.4345	30.6762	35.1212	40.5002	46.07	34.8448	42.3105	49.9336	40.973	44.6676	57.3319	60.2995	65.8401	71.5054	77.2953	83.2099	89.2491	95.4129	101.701	108.115	114.652	121.315	144.437	168.063	192.194	216.83	241.97	267.614	293.763	320.417	347.575	375.237	450.413
795	0	0	0	0	0	0	0	0	0	0	2.7794	3.30808	3.89325	4.53984	5.25314	6.03885	6.90308	7.85239	8.89378	9.65849	10.4435	11.6976	13.0088	14.3749	15.9381	18.0119	21.7252	24.8203	29.2384	33.764	38.3971	43.1378	47.986	52.9418	58.0052	63.1761	68.4546	73.8406	93.8734	114.352	135.276	156.646	178.462	200.723	223.43	246.582	270.181	294.224	387.778
796	0	0	0	0	0	0	0	0	0	0	0	0	0	0	0	0	0	0	0	0	0	0	0	0	0	0	0	0	0	0	0	0	0	0	0	0	0	0	0	0	0	0	0	0	0	0	0	0	0
798	0	0	0	0	0	0	0	0	0	0	0	0	0	0	0	0	0	0	0	0	0	0	0	0	0	0	0	0	0	0	0	0	0	0	0	0	0	0	0	0	0	0	0	0	0	0	0	0	0
800	0	0	0	0	0	0	0	0	0	0	0	0	0	0	0	0	0	0	0	0	0	0	0	0	0	0	0	0	0	0	0	0	0	0	0	0	0	0	0	0	0	0	0	0	0	0	0	0	0.205049
804	0	0	0	0	0	0	0	0	0	0	0	0	0	0	0	0	0	0	0	0	0	0	0	0	0	0	0	0.00435749	0.00508842	0.00583707	0.00660342	0.00738747	0.00818924	0.00900871	0.00984588	0.0107008	0.0115734	0.0124636	0.0303336	0.0486157	0.06731	0.0864164	0.105935	0.125866	0.146209	0.166964	0.188131	0.209711	56.433
807	0	0	0	0	0	0	0	0	0	0	0	0	0	0	0	0	0	0	0	0	0	0	0	0	0	0	0	0	0	0	0	0	0	0	0	0	0	0	0	0	0	0	0	0	0	0	0	0	0
818	0	0	0	0	3.45664	19.3897	105	140	170	202.5	250	296.176	345.882	399.118	455.882	516.176	580	647.353	718.235	792.647	870.588	952.059	1037.06	1125.59	1217.65	1313.24	1473.76	1642.83	1675.77	1709	1742.52	1776.33	1810.43	1844.83	1879.51	1914.49	1949.75	1985.3	2021.15	2057.29	2093.71	2130.43	2167.43	2204.73	2242.32	2280.2	2318.37	2356.83	2380.6
826	0	0	0	0	0	0	0	0	0	0	0	0	0	0	0	0	0	0	0	0	0	0	0	0	0	0	0	0	0	0	0	0	0	0	0	0	0	0	0	0	0	0	0	0	0	0	0	0	9.60925
834	0	0	0	0	0	0	0	0	0	0	0	0	0	0	0	0	0	0	0	0	0	0	0	0	0	0	0	0	0	0	0	0	0	0	0	0	0	0	0	0	0	0	0	0	0	0	0	0	3.18
840	0	0	0	0	0	0	0	0	0	0	0	0	0	0	0	0	0	0	2.01077	2.40741	2.837	3.24339	3.79737	4.34002	5.07875	5.83124	2.87442	3.79275	4.7271	5.68471	6.66558	7.6697	8.69709	9.74773	10.8216	11.9188	13.0392	14.1829	283.981	560.05	842.39	1131	1425.88	1727.03	2034.45	2348.14	2668.11	2994.34	4944.34
850	0	0	0	0	0	0	0	0	0	0	0	0	0	0	0	0	0	0	0	0	0	0	0	0	0	0	0	0	0	0	0	0	0	0	0	0	0	0	0	0	0	0	0	0	0	0	0	0	0
854	0	0	0	0	0	0	0	0	0	0	0	0	0	0	0	0	0	0	0	0	0	0	0	0	0	0	0	0.193322	0.211718	0.23053	0.249758	0.269402	0.289463	0.30994	0.330833	0.352143	0.373869	0.396011	0.403603	0.411263	0.418992	0.426788	0.434653	0.442586	0.450587	0.458657	0.466794	0.475	0.7155
858	0	0	0	0	0	0	0	0	0	0	0	0	0	0	0	0	0	0	0	0	0	0	0	0	0	0	0	0	0	0	0	0	0	0	0	0	0	0	0	0	0	0	0	0	0	0	0	0	2.44322
860	0	0	0	0	0	0	0	0	0	0	7.14155	8.58015	10.194	12.0011	14.0214	16.2764	18.7898	21.5875	24.6978	27.3829	30.2104	34.4234	38.916	43.6902	48.7481	54.5245	65.1524	76.5059	90.0822	103.989	118.226	132.794	147.692	162.92	178.479	194.368	210.588	227.138	288.786	351.807	416.198	481.961	549.096	617.602	687.48	758.729	831.35	905.343	1040.88
862	0	0	0	0	0	0	0	0	0	0	0	0	0	0	0	0	0	0	0	0	0	0	0	0	0	0	0	0.104581	0.106814	0.10907	0.111347	0.113647	0.115969	0.118312	0.120678	0.123066	0.125476	0.127908	0.14741	0.167331	0.18767	0.208427	0.229603	0.251198	0.273211	0.295643	0.318493	0.341762	28.886
876	0	0	0	0	0	0	0	0	0	0	0	0	0	0	0	0	0	0	0	0	0	0	0	0	0	0	0	0	0	0	0	0	0	0	0	0	0	0	0	0	0	0	0	0	0	0	0	0	0
882	0	0	0	0	0	0	0	0	0	0	0	0	0	0	0	0	0	0	0	0	0	0	0	0	0	0	0	0	0	0	0	0	0	0	0	0	0	0	0	0	0	0	0	0	0	0	0	0	0
887	0	0	0	0	0	0	0	0	0	0	0	0	0	0	0	0	0	0	0	0	0	0	0	0	0	0	0	13.3277	14.5013	15.7011	16.9271	18.1793	19.4577	20.7623	22.0932	23.4502	24.8334	26.2429	30.9597	35.7791	40.7009	45.7253	50.8521	56.0815	61.4134	66.8478	72.3848	78.0242	92.3256
891	0	0	0	0	0	0	0	0	0	0	0	0	0	0	0	0	0	0	0	0	0	0	0	0	0	0	0	0	0	0	0	0	0	0	0	0	0	0	0	0	0	0	0	0	0	0	0	0	0
894	0	0	0	0	0	0	0	0	0	0	0	0	0	0	0	0	0	0	0	0	0	0	0	0	0	0	0	0	0	0	0	0	0	0	0	0	0	0	0	0	0	0	0	0	0	0	0	0	0.318
[truncated: 108 more columns]

## Sheet: upper
ISO1	y-10000	y-9000	y-8000	y-7000	y-6000	y-5000	y-4000	y-3000	y-2000	y-1000	y0	y100	y200	y300	y400	y500	y600	y700	y800	y900	y1000	y1100	y1200	y1300	y1400	y1500	y1600	y1700	y1710	y1720	y1730	y1740	y1750	y1760	y1770	y1780	y1790	y1800	y1810	y1820	y1830	y1840	y1850	y1860	y1870	y1880	y1890	y1900	y1910
4	0	0	0	0	0	0	0	0	0	0	13.7403	15.0136	16.1901	15.7003	15.2122	14.7259	14.2413	13.3453	12.4796	11.7718	11.0841	11.2447	11.3577	7.61526	7.79974	7.9354	9.43698	8.9519	13.9748	18.9155	23.774	28.5504	33.2446	37.8567	42.3865	46.8342	51.1998	55.4831	118.196	179.8	240.296	299.683	357.961	415.131	471.192	526.144	579.987	632.722	749.869
8	0	0	0	0	0	0	0	0	0	0	0	0	0	0	0	0	0	0	0	0	0	0	0	0	0	0	0	0.551995	0.597319	0.641841	0.685561	0.728479	0.770595	0.811908	0.852419	0.892127	0.931034	0.969138	1.79259	2.60145	3.39572	4.17539	4.94047	5.69095	6.42684	7.14813	7.85483	8.54693	15.951
12	0	0	0	0	0	0	0	0	0	0	68.6023	64.5613	60.7063	57.0304	53.527	50.1897	47.0122	43.9885	41.1127	42.6216	43.8404	40.6155	37.5506	31.552	26.0392	25.0936	35.485	25.9699	31.0174	35.9801	40.8581	45.6513	50.3598	54.9834	59.5224	63.9765	68.346	72.6306	85.579	98.2892	110.761	122.995	134.99	146.748	158.267	169.547	180.59	191.394	190.687
16	0	0	0	0	0	0	0	0	0	0	0	0	0	0	0	0	0	0	0	0	0	0	0	0	0	0	0	0	0	0	0	0	0	0	0	0	0	0	0	0	0	0	0	0	0	0	0	0	0
20	0	0	0	0	0	0	0	0	0	0	0	0	0	0	0	0	0	0	0	0	0	0	0	0	0	0	0	0	0	0	0	0	0	0	0	0	0	0	0	0	0	0	0	0	0	0	0	0	0
24	0	0	0	0	0	0	0	0	0	0	0	0	0	0	0	0	0	0	0	0	0	0	0	0	1.11176	1.24446	1.29438	1.34093	1.86785	2.3861	2.89568	3.39658	3.88882	4.37238	4.84727	5.31349	5.77104	6.21992	7.41956	8.59721	9.75286	10.8865	11.9982	13.0878	14.1555	15.2012	16.2249	17.2266	20.0211
28	0	0	0	0	0	0	0	0	0	0	0	0	0	0	0	0	0	0	0	0	0	0	0	0	0	0	0	0	0	0	0	0	0	0	0	0	0	0	0	0	0	0	0	0	0	0	0	0	0
31	0	0	0	0	0	0	0	0	0	0	16.783	17.738	18.7413	19.7947	20.9001	22.0594	23.2744	24.5471	25.8792	26.9024	27.8734	41.0886	53.8151	66.0472	51.8529	63.5755	74.7908	85.4932	93.5128	101.392	109.131	116.729	124.187	131.505	138.682	145.719	152.615	159.372	215.274	270.172	324.065	376.953	428.835	479.713	529.585	578.453	626.315	673.172	651.386
32	0	0	0	0	0	0	0	0	0	0	0	0	0	0	0	0	0	0	0	2.96059	3.31653	3.71375	4.15677	4.65058	5.20065	5.81297	6.49411	7.25122	13.5981	19.8416	25.9818	32.0188	37.9524	43.7827	49.5097	55.1334	60.6538	66.0709	144.447	221.438	297.043	371.264	444.099	515.55	585.615	654.295	721.59	787.5	784.199
36	0	0	0	0	0	0	0	0	0	0	0	0	0	0	0	0	0	0	0	0	0	0	0	0	0	0	0	0	0	0	0	0	0	0	0	0	0	0	2.49673	3.30495	4.09847	4.87731	5.64144	6.39089	7.12565	7.84571	8.55108	40.0696	142.976
40	0	0	0	0	0	0	0	0	0	0	0	0	0	0	0	0	0	0	0	0	0	0	0	0	0	0	0	0.327607	0.403911	0.478942	0.5527	0.625186	0.696398	0.766337	0.835004	0.902397	0.968518	1.03336	0	0	0	0	0	0	0	0	0	7.31218	0.130543
44	0	0	0	0	0	0	0	0	0	0	0	0	0	0	0	0	0	0	0	0	0	0	0	0	0	0	0	0	0	0	0	0	0	0	0	0	0	0	0	0	0	0	0	0	0	0	0	0	0
48	0	0	0	0	0	0	0	0	0	0	0	0	0	0	0	0	0	0	0	0	0	0	0	0	0	0	0	0.186787	0.212638	0.238048	0.263017	0.287544	0.311631	0.335276	0.358481	0.381244	0.403567	0.425448	0.547154	0.666659	0.783965	0.89907	1.01198	1.12268	1.23119	1.33749	1.4416	1.5435	1.45568
50	0	0	0	0	0	0	0	0	0	0	0	0	0	0	0	0	0	0	0	0	0	0	0	0	0	0	0	0	0	0	0	0	0	0	0	0	0	0	0	0	0	0	0	0	0	0	0	0	74.266
51	0	0	0	0	0	0	0	0	0	0	0	0	0	0	0	0	0	0	0	0	0	0	0	0	0	0	0	0.458033	0.562366	0.664957	0.765806	0.864913	0.962279	1.0579	1.15178	1.24392	1.33432	1.42298	2.84339	4.23866	5.60879	6.95379	8.27365	9.56838	10.838	12.0824	13.3017	14.4959	26.8252
52	0	0	0	0	0	0	0	0	0	0	0	0	0	0	0	0	0	0	0	0	0	0	0	0	0	0	0	0	0	0	0	0	0	0	0	0	0	0	0	0	0	0	0	0	0	0	0	0	0.174333
56	0	0	0	0	0	0	0	0	0	0	0	0	0	0	0	0	0	0	0	0	0	0	0	0	0	0	0	0.101362	0.117378	0.133122	0.148595	0.163797	0.178727	0.193386	0.207773	0.221889	0.235734	0.249307	0.463437	0.673773	0.880314	1.08306	1.28201	1.47717	1.66853	1.8561	2.03987	2.21985	1.84283
60	0	0	0	0	0	0	0	0	0	0	0	0	0	0	0	0	0	0	0	0	0	0	0	0	0	0	0	0	0	0	0	0	0	0	0	0	0	0	0	0	0	0	0	0	0	0	0	0	0
64	0	0	0	0	0	0	0	0	0	0	0	0	0	0	0	0	0	0	0	0	0	0	0	0	0	0	2.38512	2.64806	2.58024	2.51316	2.44684	2.38127	2.31645	2.25239	2.18907	2.12651	2.06471	2.00365	2.6996	3.38304	4.05397	4.71237	5.35827	5.99164	6.61251	7.22085	7.81668	8.4	8.368
68	0	0	0	0	0	0	0	0	0	0	0	0	0	0	0	0	0	0	0	0	0	0	0	0	0	0	0	0.700976	0.794876	0.887172	0.977863	1.06695	1.15443	1.2403	1.32458	1.40724	1.4883	1.56776	1.74071	1.91039	2.0768	2.23994	2.3998	2.55638	2.7097	2.85974	3.00651	3.15	15.167
70	0	0	0	0	0	0	0	0	0	0	0	0	0	0	0	0	0	0	0	0	0	0	0	0	0	0	0	0.113139	0.124557	0.135776	0.146797	0.157619	0.168242	0.178667	0.188893	0.19892	0.208748	0.218377	0.422831	0.623664	0.820876	1.01447	1.20444	1.39079	1.57353	1.75264	1.92813	2.1	1.74333
72	0	0	0	0	0	0	0	0	0	0	0	0	0	0	0	0	0	0	0	0	0	0	0	0	0	0	0	0	0	0	0	0	0	0	0	0	0	0	0	0	0	0	0	0	0	0	0	0	0.0751123
76	0	0	0	0	0	0	0	0	0	0	0	0	0	0	0	0	0	0	0	0	0	0	0	0	0	0	0	0.02	0.025916	0.031734	0.037454	0.043076	0.0486	0.054026	0.059354	0.064584	0.069716	0.07475	0.11229	0.14916	0.18536	0.22089	0.25575	0.28994	0.32346	0.35631	0.38849	0.42	85.772
84	0	0	0	0	0	0	0	0	0	0	0	0	0	0	0	0	0	0	0	0	0	0	0	0	0	0	0	0	0	0	0	0	0	0	0	0	0	0	0	0	0	0	0	0	0	0	0	0	0
86	0	0	0	0	0	0	0	0	0	0	0	0	0	0	0	0	0	0	0	0	0	0	0	0	0	0	0	0	0	0	0	0	0	0	0	0	0	0	0	0	0	0	0	0	0	0	0	0	0
90	0	0	0	0	0	0	0	0	0	0	0	0	0	0	0	0	0	0	0	0	0	0	0	0	0	0	0	0	0	0	0	0	0	0	0	0	0	0	0	0	0	0	0	0	0	0	0	0	0
92	0	0	0	0	0	0	0	0	0	0	0	0	0	0	0	0	0	0	0	0	0	0	0	0	0	0	0	0	0	0	0	0	0	0	0	0	0	0	0	0	0	0	0	0	0	0	0	0	0
96	0	0	0	0	0	0	0	0	0	0	0	0	0	0	0	0	0	0	0	0	0	0	0	0	0	0	0	0	0	0	0	0	0	0	0	0	0	0	0	0	0	0	0	0	0	0	0	0	0
100	0	0	0	0	0	0	0	0	0	0	0	0	0	0	0	0	0	0	0	0	0	0	0	0	0	0	0	2.09528	2.3222	2.54519	2.76425	2.97938	3.19058	3.39785	3.60119	3.8006	3.99608	4.18763	7.15609	10.0718	12.9349	15.7452	18.5028	21.2077	23.8598	26.4593	29.006	31.5	41.9319
104	0	0	0	0	0	0	0	0	0	2.31802	4.42969	4.79042	5.13625	5.46719	5.78326	6.08446	6.37078	6.64223	6.8988	7.14051	7.36734	9.02298	10.6042	10.0348	11.6811	13.2455	14.5662	15.8125	18.0358	20.2212	22.3687	24.4783	26.55	28.5838	30.5797	32.5377	34.4578	36.34	62.0046	87.2134	111.966	136.264	160.105	183.491	206.42	228.894	250.913	272.475	319.64
108	0	0	0	0	0	0	0	0	0	0	0	0	0	0	0	0	0	0	0	0	0	0	0	0	0	0	0	0	0	0	0	0	0	0	0	0	0	0	0	0	0	0	0	0	0	0	0	0	2.44067
112	0	0	0	0	0	0	0	0	0	0	0	0	0	0	0	0	0	0	0	0	0	0	0	0	0	0	0	0.161586	0.198393	0.234585	0.270163	0.305126	0.339475	0.373209	0.406329	0.438834	0.470724	0.502001	1.0031	1.49532	1.97868	2.45317	2.9188	3.37555	3.82344	4.26246	4.69261	5.1139	7.48787
116	0	0	0	0	0	0	0	0	0	0	0	0	0	0	0	0	0	0	0	0	0	0	0	0	0	0	0	0.738585	0.916978	1.0924	1.26485	1.43432	1.60082	1.76435	1.92491	2.0825	2.23711	2.38875	3.56314	4.71656	5.84901	6.9605	8.05101	9.12056	10.1691	11.1968	12.2034	13.1891	20.6468
120	0	0	0	0	0	0	0	0	0	0	0	0	0	0	0	0	0	0	0	0	0	0	0	0	0	0	0	0	0	0	0	0	0	0	0	0	0	0	0	0	0	0	0	0	0	0	0	0	0.348667
124	0	0	0	0	0	0	0	0	0	0	0	0	0	0	0	0	0	0	0	0	0	0	0	0	0	0	0	0	0	0	0	0	0	0	0	0	0	0	3.6936	7.3224	10.8864	14.3856	17.82	21.1896	24.4944	27.7344	30.9096	34.02	70.5979
132	0	0	0	0	0	0	0	0	0	0	0	0	0	0	0	0	0	0	0	0	0	0	0	0	0	0	0	0	0	0	0	0	0	0	0	0	0	0	0	0	0	0	0	0	0	0	0	0	0.228389
136	0	0	0	0	0	0	0	0	0	0	0	0	0	0	0	0	0	0	0	0	0	0	0	0	0	0	0	0	0	0	0	0	0	0	0	0	0	0	0	0	0	0	0	0	0	0	0	0	0
140	0	0	0	0	0	0	0	0	0	0	0	0	0	0	0	0	0	0	0	0	0	0	0	0	0	0	0	0	0	0	0	0	0	0	0	0	0	0	0	0	0	0	0	0	0	0	0	0	0
144	0	0	0	0	0	0	0	0	0	0	1.11995	1.26589	1.40028	1.52315	1.63449	1.73428	1.82251	1.8991	1.96397	2.01701	2.05803	2.20956	2.33667	2.15053	1.94906	1.97227	2.30724	2.57285	2.70988	2.84436	2.9763	3.1057	3.23256	3.35687	3.47865	3.59788	3.71457	3.82871	12.1927	20.4094	28.4787	36.4007	44.1754	51.8028	59.2829	66.6156	73.801	80.8391	112.073
148	0	0	0	0	0	0	0	0	0	0	0	0	0	0	0	0	0	0	0	0	0	0	0	0	0	0	0	0.309814	0.360148	0.40963	0.458261	0.506039	0.552966	0.599041	0.644264	0.688636	0.732155	0.774823	0.789939	0.804672	0.819021	0.832987	0.846569	0.859768	0.872584	0.885016	0.897065	0.908731	1.81054
152	0	0	0	0	0	0	0	0	0	0	43.3692	45.0105	46.6632	48.3197	49.9706	51.6049	53.2096	54.769	56.2644	57.6175	58.5928	61.2667	63.3143	64.7073	65.4059	65.3528	60.4339	55.4225	62.7134	69.8796	76.921	83.8377	90.6296	97.2968	103.839	110.257	116.55	122.718	160.558	197.715	234.189	269.981	305.091	339.517	373.261	406.323	438.702	470.399	391.872
156	0	0	0	0	0	0	63.1513	138.779	273.757	539.909	1592.5	1585.09	1577.02	1568.29	1558.9	1548.84	1538.12	1526.75	1514.71	1724	1730.42	1735.2	1738.34	1739.84	1739.71	2176.69	2192.01	2204.38	2451.53	2694.41	2933.03	3167.37	3397.44	3623.24	3844.77	4062.03	4275.02	4483.73	5231.59	5965.63	6685.87	7392.31	8084.95	8763.77	9428.8	10080	10717.4	11341.1	13117.7
158	0	0	0	0	0	0	0	0	0	0	0	0	0	0	0	0	0	0	0	0	0	0	2.20965	2.35992	2.46125	2.50761	2.26277	9.94701	12.4035	14.8191	17.1938	19.5276	21.8205	24.0725	26.2836	28.4538	30.583	32.6714	43.3191	53.7749	64.039	74.1113	83.9918	93.6805	103.177	112.483	121.596	130.518	162.272
162	0	0	0	0	0	0	0	0	0	0	0	0	0	0	0	0	0	0	0	0	0	0	0	0	0	0	0	0	0	0	0	0	0	0	0	0	0	0	0	0	0	0	0	0	0	0	0	0	0
166	0	0	0	0	0	0	0	0	0	0	0	0	0	0	0	0	0	0	0	0	0	0	0	0	0	0	0	0	0	0	0	0	0	0	0	0	0	0	0	0	0	0	0	0	0	0	0	0	0
170	0	0	0	0	0	0	0	0	0	0	0	0	0	0	0	0	0	3.01773	3.07226	3.21953	3.33551	3.5767	3.76519	3.89769	3.96942	8.56845	6.35173	4.75	4.96	5.166	5.368	5.566	5.76	5.95	6.136	6.318	6.496	6.67	7.0908	7.5032	7.9072	8.3028	8.69	9.0688	9.4392	9.8012	10.1548	10.5	48.116
174	0	0	0	0	0	0	0	0	0	0	0	0	0	0	0	0	0	0	0	0	0	0	0	0	0	0	0	0	0	0	0	0	0	0	0	0	0	0	0	0	0	0	0	0	0	0	0	0	0
175	0	0	0	0	0	0	0	0	0	0	0	0	0	0	0	0	0	0	0	0	0	0	0	0	0	0	0	0	0	0	0	0	0	0	0	0	0	0	0	0	0	0	0	0	0	0	0	0	0
178	0	0	0	0	0	0	0	0	0	0	0	0	0	0	0	0	0	0	0	0	0	0	0	0	0	0	0	0	0	0	0	0	0	0	0	0	0	0	0	0	0	0	0	0	0	0	0	0	0
180	0	0	0	0	0	0	0	0	0	0	0	0	0	0	0	0	0	0	0	0	0	0	0	0	0	0	0	0	0	0	0	0	0	0	0	0	0	0	0	0	0	0	0	0	0	0	0	0	0
184	0	0	0	0	0	0	0	0	0	0	0	0	0	0	0	0	0	0	0	0	0	0	0	0	0	0	0	0	0	0	0	0	0	0	0	0	0	0	0	0	0	0	0	0	0	0	0	0	0
188	0	0	0	0	0	0	0	0	0	0	0	0	0	0	0	0	0	0	0	0	0	0	0	0	0	0	0	0.244156	0.290729	0.336519	0.381527	0.425751	0.469193	0.511853	0.55373	0.594824	0.635135	0.674664	1.75377	2.81385	3.85489	4.87689	5.87987	6.8638	7.8287	8.77457	9.7014	10.6092	13.34
191	0	0	0	0	0	0	0	0	0	0	0	0	0	0	0	0	0	0	0	0	0	0	0	0	0	0	0	0.117533	0.128556	0.139387	0.150025	0.160469	0.170721	0.18078	0.190645	0.200318	0.209798	0.219085	0.423462	0.62422	0.821359	1.01488	1.20478	1.39106	1.57372	1.75277	1.92819	2.1	1.74333
192	0	0	0	0	0	0	0	0	0	0	0	0	0	0	0	0	0	0	0	0	0	0	0	0	0	0	0	0.121341	0.182329	0.242317	0.301305	0.359295	0.416285	0.472276	0.527267	0.581259	0.634252	0.686246	1.32311	1.9487	2.56302	3.16605	3.75781	4.33829	4.90749	5.46541	6.01206	6.54743	13.7697
196	0	0	0	0	0	0	0	0	0	0	0	0	0	0	0	0	0	0	0	0	0	0	0	0	0	0	0	1.44055	1.50093	1.56015	1.61821	1.67512	1.73086	1.78544	1.83887	1.89113	1.94224	1.99218	2.64993	3.29583	3.92989	4.5521	5.16247	5.761	6.34769	6.92253	7.48553	8.03668	10.527
203	0	0	0	0	0	0	0	0	0	0	0	0	0	0	0	0	0	0	0	0	0	0	0	0	0	0	0	0.222759	0.218401	0.214084	0.209809	0.205575	0.201383	0.197233	0.193124	0.189056	0.18503	0.181046	0.352148	0.520221	0.685265	0.847279	1.00626	1.16222	1.31515	1.46504	1.61191	1.75575	1.45755
204	0	0	0	0	0	0	0	0	0	0	0	0	0	0	0	0	0	0	0	0	0	0	0	0	0	0	0	0	0	0	0	0	0	0	0	0	0	0	0	0	0	0	0	0	0	0	0	0	0
208	0	0	0	0	0	0	0	0	0	0	0	0	0	0	0	0	0	0	0	0	0	0	0	0	0	0	0	0.253055	0.269727	0.286097	0.302165	0.317932	0.333397	0.348561	0.363423	0.377984	0.392243	0.406201	0.880741	1.34689	1.80466	2.25404	2.69503	3.12763	3.55185	3.96768	4.37512	4.77417	7.13398
212	0	0	0	0	0	0	0	0	0	0	0	0	0	0	0	0	0	0	0	0	0	0	0	0	0	0	0	0	0	0	0	0	0	0	0	0	0	0	0	0	0	0	0	0	0	0	0	0	0
214	0	0	0	0	0	0	0	0	0	0	0	0	0	0	0	0	0	0	0	0	0	0	0	0	0	0	0	0.0463767	0.0509072	0.0553587	0.0597311	0.0640244	0.0682387	0.0723739	0.0764301	0.0804072	0.0843053	0.0881243	0.188785	0.287667	0.384769	0.480092	0.573635	0.665399	0.755383	0.843588	0.930014	1.01466	19.3736
218	0	0	0	0	0	0	0	0	0	0	0	0	0	0	0	0	0	0	0	0	0	0	0	0	0	0	0	0.232527	0.229665	0.22682	0.22399	0.221177	0.21838	0.2156	0.212835	0.210087	0.207354	0.204638	0.21546	0.22606	0.23644	0.246599	0.256536	0.266252	0.275748	0.285022	0.294075	0.302907	55.5728
222	0	0	0	0	0	0	0	0	0	0	0	0	0	0	0	0	0	0	0	0	0	0	0	0	0	0	0	0.0189956	0.0228086	0.0265577	0.0302428	0.033864	0.0374213	0.0409145	0.0443439	0.0477092	0.0510107	0.0542481	0.120547	0.185675	0.249632	0.312417	0.374031	0.434473	0.493744	0.551843	0.608771	0.664528	2.53765
226	0	0	0	0	0	0	0	0	0	0	0	0	0	0	0	0	0	0	0	0	0	0	0	0	0	0	0	0	0	0	0	0	0	0	0	0	0	0	0	0	0	0	0	0	0	0	0	0	0
231	0	0	0	0	0	0	0	0	0	0	0	0	0	0	0	0	0	2.88911	3.46429	3.39605	3.32784	3.25968	3.19155	3.12346	3.05541	2.9874	2.91942	2.85149	3.14778	3.43893	3.72493	4.00578	4.28149	4.55205	4.81746	5.07773	5.33285	5.58282	7.26085	8.90858	10.526	12.1132	13.67	15.1966	16.6929	18.1589	19.5946	21	41.8176
232	0	0	0	0	0	0	0	0	0	0	0	0	0	0	0	0	0	0	0	0	0	0	0	0	0	0	0	0.298816	0.34257	0.38558	0.427845	0.469366	0.510143	0.550176	0.589464	0.628009	0.665808	0.702864	0.733922	0.764328	0.794082	0.823184	0.851634	0.879432	0.906577	0.933071	0.958912	0.984101	1.92025
233	0	0	0	0	0	0	0	0	0	0	0	0	0	0	0	0	0	0	0	0	0	0	0	0	0	0	0	0	0	0	0	0	0	0	0	0	0	0	0	0	0	0	0	0	0	0	0	0	0.147728
234	0	0	0	0	0	0	0	0	0	0	0	0	0	0	0	0	0	0	0	0	0	0	0	0	0	0	0	0	0	0	0	0	0	0	0	0	0	0	0	0	0	0	0	0	0	0	0	0	0
238	0	0	0	0	0	0	0	0	0	0	0	0	0	0	0	0	0	0	0	0	0	0	0	0	0	0	0	0	0	0	0	0	0	0	0	0	0	0	0	0	0	0	0	0	0	0	0	0	0
242	0	0	0	0	0	0	0	0	0	0	0	0	0	0	0	0	0	0	0	0	0	0	0	0	0	0	0	0	0	0	0	0	0	0	0	0	0	0	0	0	0	0	0	0	0	0	0	0	0.174333
246	0	0	0	0	0	0	0	0	0	0	0	0	0	0	0	0	0	0	0	0	0	0	0	0	0	0	0	0	0	0	0	0	0	0	0	0	0	0	0	0	0	0	0	0	0	0	0	0	0
250	0	0	0	0	0	0	0	0	0	0	9.07388	10.1628	11.1678	9.6018	8.10792	7.46945	6.85407	6.99486	7.10797	7.87459	8.55907	9.78771	12.6793	18.4277	12.0452	15.4875	17.8675	19.6822	20.9925	22.279	23.5419	24.7811	25.9967	27.1885	28.3567	29.5013	30.6221	31.7193	51.0991	70.1341	88.8243	107.17	125.17	142.826	160.137	177.103	193.724	210	225.525
254	0	0	0	0	0	0	0	0	0	0	0	0	0	0	0	0	0	0	0	0	0	0	0	0	0	0	0	0	0	0	0	0	0	0	0	0	0	0	0	0	0	0	0	0	0	0	0	0	0.173275
258	0	0	0	0	0	0	0	0	0	0	0	0	0	0	0	0	0	0	0	0	0	0	0	0	0	0	0	0	0	0	0	0	0	0	0	0	0	0	0	0	0	0	0	0	0	0	0	0	0
262	0	0	0	0	0	0	0	0	0	0	0	0	0	0	0	0	0	0	0	0	0	0	0	0	0	0	0	0	0	0	0	0	0	0	0	0	0	0	0	0	0	0	0	0	0	0	0	0	0.0668393
266	0	0	0	0	0	0	0	0	0	0	0	0	0	0	0	0	0	0	0	0	0	0	0	0	0	0	0	0	0	0	0	0	0	0	0	0	0	0	0	0	0	0	0	0	0	0	0	0	0.697333
268	0	0	0	0	0	0	0	0	0	0	1.70589	1.76597	1.82586	1.88519	1.94349	2.00021	2.05467	2.10608	2.15348	2.16481	2.16273	3.06443	3.84061	4.48848	3.32412	3.81048	4.11754	4.21723	4.59444	4.96503	5.32898	5.68631	6.03701	6.38108	6.71852	7.04933	7.37352	7.69108	10.3713	13.0033	15.5872	18.1228	20.6103	23.0495	25.4406	27.7835	30.0781	32.3246	38.8789
270	0	0	0	0	0	0	0	0	0	0	0	0	0	0	0	0	0	0	0	0	0	0	0	0	0	0	0	1.33302	1.27344	1.21464	1.15663	1.09941	1.04298	0.98734	0.932488	0.878425	0.825151	0.772666	0.763619	0.754614	0.745649	0.736725	0.727842	0.719	0.710198	0.701438	0.692718	0.684039	0.681433
275	0	0	0	0	0	0	0	0	0	0	0	0	0	0	0	0	0	0	0	0	0	0	0	0	0	0	0	0.0934777	0.118757	0.143616	0.168055	0.192075	0.215675	0.238855	0.261615	0.283955	0.305876	0.327377	0.400603	0.472494	0.543051	0.612273	0.68016	0.746713	0.811931	0.875815	0.938364	0.999578	3.36143
276	0	0	0	0	0	0	0	0	0	0	0	0	0	0	0	0	0	0	0	0	1.99021	3.12001	4.96547	5.98269	3.10995	3.93619	4.19753	3.75928	4.27444	4.78081	5.27838	5.76716	6.24714	6.71833	7.18072	7.63432	8.07913	8.51514	17.857	27.0336	36.0451	44.8914	53.5725	62.0883	70.439	78.6246	86.6449	94.5	103.905
288	0	0	0	0	0	0	0	0	0	0	0	0	0	0	0	0	0	0	0	0	0	0	0	0	0	0	0	1.57861	1.63395	1.6882	1.74135	1.7934	1.84436	1.89422	1.94299	1.99066	2.03723	2.0827	2.07454	2.0662	2.05769	2.049	2.04014	2.03111	2.0219	2.01251	2.00295	1.99322	2.6475
292	0	0	0	0	0	0	0	0	0	0	0	0	0	0	0	0	0	0	0	0	0	0	0	0	0	0	0	0	0	0	0	0	0	0	0	0	0	0	0	0	0	0	0	0	0	0	0	0	0
296	0	0	0	0	0	0	0	0	0	0	0	0	0	0	0	0	0	0	0	0	0	0	0	0	0	0	0	0	0	0	0	0	0	0	0	0	0	0	0	0	0	0	0	0	0	0	0	0	0
300	0	0	0	0	0	0	0	0	0	0	7.9711	7.83713	7.70316	6.62304	5.57642	4.19822	2.86692	2.98916	3.10471	3.21356	3.31571	3.50862	3.72264	3.89344	2.74299	2.98079	4.37071	4.27023	4.66254	5.04797	5.42652	5.79819	6.16299	6.5209	6.87194	7.2161	7.55338	7.88378	15.9352	23.8441	31.6106	39.2346	46.7162	54.0553	61.252	68.3062	75.218	81.9873	126.596
304	0	0	0	0	0	0	0	0	0	0	0	0	0	0	0	0	0	0	0	0	0	0	0	0	0	0	0	0	0	0	0	0	0	0	0	0	0	0	0	0	0	0	0	0	0	0	0	0	0
308	0	0	0	0	0	0	0	0	0	0	0	0	0	0	0	0	0	0	0	0	0	0	0	0	0	0	0	0	0	0	0	0	0	0	0	0	0	0	0	0	0	0	0	0	0	0	0	0	0
312	0	0	0	0	0	0	0	0	0	0	0	0	0	0	0	0	0	0	0	0	0	0	0	0	0	0	0	0	0	0	0	0	0	0	0	0	0	0	0	0	0	0	0	0	0	0	0	0	0.0941426
316	0	0	0	0	0	0	0	0	0	0	0	0	0	0	0	0	0	0	0	0	0	0	0	0	0	0	0	0	0	0	0	0	0	0	0	0	0	0	0	0	0	0	0	0	0	0	0	0	0
320	0	0	0	0	0	0	0	0	0	0	0	0	0	0	0	0	0	0	2.30863	3.3016	4.18453	4.22795	4.2371	4.20947	4.14145	4.02761	2.75673	2.88039	2.91557	2.94982	2.98313	3.0155	3.04693	3.07742	3.10697	3.13558	3.16325	3.18999	4.79793	6.37718	7.92773	9.44959	10.9427	12.4072	13.843	15.25	16.6284	17.9781	20.5033
324	0	0	0	0	0	0	0	0	0	0	0	0	0	0	0	0	0	0	0	0	0	2.68232	2.98635	3.32308	3.69573	4.10781	4.5631	5.06567	5.12467	5.18206	5.23784	5.29202	5.34459	5.39556	5.44493	5.49269	5.53884	5.58339	5.55135	5.51903	5.48641	5.45351	5.42032	5.38683	5.35306	5.319	5.28464	5.25	7.845
328	0	0	0	0	0	0	0	0	0	0	0	2.97341	3.59833	4.35015	5.25323	6.33618	7.63237	9.18052	11.0252	13.2172	15.8137	16.6127	17.2635	19.1289	20.6911	21.9391	20.572	21.2439	22.1757	23.0897	23.9859	24.8644	25.725	26.568	27.3931	28.2005	28.9901	29.762	29.7825	29.7981	29.8088	29.8146	29.8155	29.8115	29.8026	29.7888	29.7701	29.7465	40.3843
332	0	0	0	0	0	0	0	0	0	0	0	0	0	0	0	0	0	0	0	0	0	0	0	0	0	0	0	0.0501495	0.108495	0.165893	0.222344	0.277847	0.332403	0.386011	0.438671	0.490384	0.54115	0.590968	1.09821	1.59646	2.08572	2.566	3.03728	3.49958	3.95289	4.3972	4.83253	5.25887	8.73139
334	0	0	0	0	0	0	0	0	0	0	0	0	0	0	0	0	0	0	0	0	0	0	0	0	0	0	0	0	0	0	0	0	0	0	0	0	0	0	0	0	0	0	0	0	0	0	0	0	0
336	0	0	0	0	0	0	0	0	0	0	0	0	0	0	0	0	0	0	0	0	0	0	0	0	0	0	0	0	0	0	0	0	0	0	0	0	0	0	0	0	0	0	0	0	0	0	0	0	0
340	0	0	0	0	0	0	0	0	0	0	0	0	0	0	0	0	0	0	0	0	0	0	0	0	0	0	0	0.348311	0.378011	0.407187	0.435839	0.463968	0.491572	0.518652	0.545209	0.571241	0.596749	0.621734	1.29722	1.96077	2.61237	3.25202	3.87973	4.49549	5.09931	5.69118	6.2711	6.83908	12.226
0	0	0	0	0	0	0	0	0	0	0	0	0	0	0	0	0	0	0	0	0	0	0	0	0	0	0	0	0	0	0	0	0	0	0	0	0	0	0	0	0	0	0	0	0	0	0	0	0	0
348	0	0	0	0	0	0	0	0	0	0	0	0	0	0	0	0	0	0	0	0	0	0	0	0	0	0	0	0.247448	0.30026	0.352187	0.403231	0.453391	0.502668	0.55106	0.598569	0.645194	0.690936	0.735794	1.47134	2.19387	2.90339	3.59988	4.28336	4.95383	5.61128	6.25571	6.88712	7.50552	14.5177
352	0	0	0	0	0	0	0	0	0	0	0	0	0	0	0	0	0	0	0	0	0	0	0	0	0	0	0	0	0	0	0	0	0	0	0	0	0	0	0	0	0	0	0	0	0	0	0	0	0
356	0	0	0	0	0	0	79.7773	141.006	249.179	440.255	777.696	729.87	683.232	638.06	594.561	552.887	513.138	475.376	439.63	405.899	374.165	344.387	316.515	290.486	266.229	243.669	222.727	241.785	309.011	375.122	440.118	503.998	566.762	628.412	688.945	748.363	806.666	863.853	2119.78	3353.53	4565.12	5754.55	6921.81	8066.91	9189.84	10290.6	11369.2	12425.6	14562.3
360	0	0	0	0	0	0	0	0	0	0	0	3.2349	3.81715	4.47786	5.22607	6.0717	7.02565	8.0999	9.30753	10.6628	12.1815	14.735	17.6382	20.9295	29.0125	36.3104	40.2718	45.1025	53.4728	61.7022	69.7908	77.7386	85.5455	93.2117	100.737	108.121	115.365	122.468	223.263	322.271	419.491	514.925	608.572	700.431	790.504	878.79	965.288	1050	1551.57
364	0	0	0	0	2.57201	14.367	74.4211	79.0554	58.1333	56.444	83.4735	83.6859	83.7013	83.5269	83.1703	82.6387	81.9397	71.4032	61.5528	61.6945	61.6367	62.0414	62.2022	41.4202	42.1614	42.6662	50.5243	45.1025	51.8838	55.9055	59.855	63.7323	67.5374	71.2703	74.931	78.5195	82.0359	85.48	110.463	134.995	159.075	182.704	205.882	228.608	250.883	272.707	294.079	315	1080.87
368	0	0	0	1.72744	2.90028	15.6115	138.63	171.807	170.071	191.667	113.38	114.197	114.653	109.773	104.996	95.7605	87.0431	145.212	197.517	169.038	142.684	118.386	88.0668	60.5412	57.1267	53.805	63.2202	32.3714	49.767	52.05	54.2894	56.4852	58.6373	60.7458	62.8106	64.8318	66.8093	68.7432	94.3234	119.444	144.106	168.308	192.051	215.335	238.16	260.525	282.431	303.878	408.672
372	0	0	0	0	0	0	0	0	0	0	0	0	0	0	0	0	0	0	0	0	0	0	0	0	0	0	0	0	0	0	0	0	0	0	0	0	0	0	0	0	0	0	0	0	0	0	0	0	0
376	0	0	0	0	0	0	0	0	0	0	0	0	0	0	0	0	0	0	0	0	0	0	0	0	0	0	0	1.87814	2.18424	2.48516	2.7809	3.07147	3.35685	3.63706	3.91208	4.18193	4.44659	4.70608	5.61022	6.49779	7.36877	8.22317	9.061	9.88224	10.6869	11.475	12.2465	13.0014	30.365
380	0	0	0	0	0	0	0	0	0	0	0	8.14535	114.637	101.338	89.0966	56.7861	27.5152	38.6082	48.4074	51.4017	56.0231	65.9621	81.2117	112.349	68.1537	72.222	100.033	95.7132	104.414	112.963	121.359	129.602	137.692	145.63	153.415	161.047	168.527	175.854	305.165	432.18	556.9	679.324	799.453	917.287	1032.82	1146.07	1257.01	1365.67	1726.56
384	0	0	0	0	0	0	0	0	0	0	0	0	0	0	0	0	0	0	0	0	0	0	0	0	0	0	0	0.18086	0.20515	0.229024	0.252484	0.275528	0.298158	0.320372	0.342171	0.363555	0.384524	0.405078	0.46628	0.526347	0.585278	0.643073	0.699733	0.755257	0.809646	0.8629	0.915018	0.966	1.44348
388	0	0	0	0	0	0	0	0	0	0	0	0	0	0	0	0	0	0	0	0	0	0	0	0	0	0	0	0.192155	0.295091	0.396342	0.495907	0.593788	0.689984	0.784495	0.87732	0.968461	1.05792	1.14569	1.76087	2.36509	2.95834	3.54062	4.11194	4.67228	5.22166	5.76008	6.28752	6.804	9.48373
392	0	0	0	0	0	0	0	0	0	0	0	16.3139	22.0646	33.4548	43.9574	63.437	81.2407	112.36	134.713	164.692	161.431	163.442	129.394	138.788	165.276	202.747	257.178	365.071	396.755	427.88	458.448	488.457	517.908	546.801	575.136	602.913	630.131	656.792	875.96	1091.18	1302.46	1509.79	1713.18	1912.62	2108.12	2299.67	2487.28	2670.94	2696.63
398	0	0	0	0	0	0	0	0	0	0	0	0	0	0	0	0	0	0	2.25817	2.7679	3.39137	4.15357	5.08491	6.22232	7.61063	9.30421	11.3689	13.8844	19.0614	24.1531	29.1595	34.0806	38.9164	43.667	48.3322	52.9121	57.4068	61.8161	141.439	219.655	296.466	371.869	445.867	518.458	589.643	659.421	727.794	794.759	811.748
400	0	0	0	0	0	0	0	0	0	0	0	0	0	0	0	0	0	0	0	0	0	0	0	0	0	0	0	1.31274	1.38164	1.44926	1.51559	1.58065	1.64442	1.70692	1.76813	1.82806	1.88671	1.94409	2.77542	3.59188	4.39345	5.18014	5.95195	6.70888	7.45092	8.17809	8.89037	9.58778	12.8942
404	0	0	0	0	0	0	0	0	0	0	0	0	0	0	0	0	0	0	0	0	0	0	0	0	0	0	0	1.1315	1.32749	1.52018	1.70955	1.89562	2.07838	2.25784	2.43399	2.60683	2.77636	2.94259	3.1611	3.37533	3.58528	3.79095	3.99233	4.18943	4.38225	4.57078	4.75504	4.93501	6.39107
408	0	0	0	0	0	0	0	0	0	0	0	3.10356	3.83337	4.72856	5.82434	7.16252	8.79235	10.7712	13.1651	14.1125	14.8951	16.9165	21.2521	14.9354	16.212	17.0759	19.4095	21.6102	26.7414	31.787	36.7471	41.6217	46.4107	51.1141	55.732	60.2644	64.7112	69.0724	84.4601	99.5673	114.394	128.94	143.206	157.191	170.896	184.32	197.464	210.327	254.667
410	0	0	0	0	0	0	0	0	0	0	0	0	2.9621	3.92358	5.18926	6.85162	9.02937	11.8738	15.5758	16.6753	17.573	19.9203	24.9667	17.4924	18.9101	19.8032	22.3134	24.4766	31.6626	38.7295	45.6774	52.5062	59.2159	65.8066	72.2782	78.6307	84.8642	90.9787	113.5	135.613	157.317	178.611	199.497	219.974	240.041	259.7	278.95	297.791	360.53
414	0	0	0	0	0	0	0	0	0	0	0	0	0	0	0	0	0	0	0	0	0	0	0	0	0	0	0	0.179609	0.189125	0.198466	0.207629	0.216616	0.225426	0.234059	0.242516	0.250796	0.2589	0.266826	0.302237	0.336987	0.371074	0.404499	0.437263	0.469364	0.500803	0.531581	0.561696	0.59115	0.490748
417	0	0	0	0	0	0	0	0	0	0	0	19.3167	20.0733	20.8417	21.6196	22.4045	23.1933	23.9825	24.7678	24.8779	24.9082	25.814	26.5578	27.1379	27.5519	27.7966	30.1267	32.0277	38.3755	44.6167	50.7514	56.7796	62.7013	68.5164	74.2251	79.8272	85.3228	90.7119	118.983	146.744	173.995	200.736	226.967	252.689	277.901	302.603	326.795	350.477	377.044
418	0	0	0	0	0	0	0	0	0	0	0	0	0	0	0	0	0	0	0	0	0	0	0	0	0	0	0	0.311528	0.34742	0.382692	0.417345	0.451379	0.484794	0.51759	0.549766	0.581324	0.612263	0.642582	0.933394	1.21901	1.49942	1.77463	2.04464	2.30946	2.56907	2.82348	3.07269	3.31671	4.58899
422	0	0	0	0	0	0	0	0	0	0	9.09416	10.0073	10.9984	12.071	10.3524	8.86348	7.57435	6.45884	5.49411	4.92094	4.37568	4.36482	4.32045	4.23933	3.1397	3.0828	3.24571	2.43969	2.47668	2.51276	2.54793	2.58219	2.61553	2.64797	2.67949	2.7101	2.7398	2.76858	3.55515	4.32749	5.08561	5.8295	6.55918	7.27463	7.97587	8.66288	9.33566	9.99423	14.4817
426	0	0	0	0	0	0	0	0	0	0	0	0	0	0	0	0	0	0	0	0	0	0	0	0	0	0	0	0	0	0	0	0	0	0	0	0	0	0	0	0	0	0	0	0	0	0	0	0	0.0442772
428	0	0	0	0	0	0	0	0	0	0	0	0	0	0	0	0	0	0	0	0	0	0	0	0	0	0	0	0	0	0	0	0	0	0	0	0	0	0	0	0	0	0	0	0	0	0	0	0	0.027139
430	0	0	0	0	0	0	0	0	0	0	0	0	0	0	0	0	0	0	0	0	0	0	0	0	0	0	0	0	0	0	0	0	0	0	0	0	0	0	0	0	0	0	0	0	0	0	0	0	0
434	0	0	0	0	0	0	0	0	0	0	14.2662	15.9544	17.6148	15.7463	13.8963	14.48	15.0474	15.5976	16.1297	16.3102	16.4777	11.414	6.45084	9.56511	12.6	15.5514	15.3463	15.1345	16.6266	18.0928	19.5329	20.947	22.335	23.6971	25.0331	26.3431	27.6271	28.8851	30.3305	31.7462	33.1321	34.4883	35.8146	37.1112	38.3781	39.6151	40.8225	42	49.0492
438	0	0	0	0	0	0	0	0	0	0	0	0	0	0	0	0	0	0	0	0	0	0	0	0	0	0	0	0	0	0	0	0	0	0	0	0	0	0	0	0	0	0	0	0	0	0	0	0	0
440	0	0	0	0	0	0	0	0	0	0	0	0	0	0	0	0	0	0	0	0	0	0	0	0	0	0	0	0	0	0	0	0	0	0	0	0	0	0	0	0	0	0	0	0	0	0	0	0	0.132989
442	0	0	0	0	0	0	0	0	0	0	0	0	0	0	0	0	0	0	0	0	0	0	0	0	0	0	0	0	0	0	0	0	0	0	0	0	0	0	0	0	0	0	0	0	0	0	0	0	0
446	0	0	0	0	0	0	0	0	0	0	0	0	0	0	0	0	0	0	0	0	0	0	0	0	0	0	0	0	0	0	0	0	0	0	0	0	0	0	0	0	0	0	0	0	0	0	0	0	0
450	0	0	0	0	0	0	0	0	0	0	0	0	0	0	0	0	0	0	0	0	0	0	0	0	0	2.35087	2.7853	3.19551	3.69011	4.17631	4.65413	5.12355	5.58459	6.03723	6.48149	6.91735	7.34483	7.76392	8.06089	8.35146	8.63565	8.91343	9.18482	9.44982	9.70843	9.96064	10.2065	10.4459	60.7021
454	0	0	0	0	0	0	0	0	0	0	0	0	0	0	0	0	0	0	0	0	0	0	0	0	0	0	0	0	0	0	0	0	0	0	0	0	0	0	0	0	0	0	0	0	0	0	0	0	0.167359
458	0	0	0	0	0	0	0	0	0	0	0	0	0	0	0	0	0	0	0	0	0	2.75313	3.13821	3.50468	3.85255	4.18182	5.10978	5.99074	6.88782	7.76966	8.63625	9.4876	10.3237	11.1446	11.9502	12.7406	13.5157	14.2756	24.1363	33.8219	43.3323	52.6675	61.8275	70.8123	79.622	88.2565	96.7158	105	126.915
462	0	0	0	0	0	0	0	0	0	0	0	0	0	0	0	0	0	0	0	0	0	0	0	0	0	0	0	0	0	0	0	0	0	0	0	0	0	0	0	0	0	0	0	0	0	0	0	0	0
466	0	0	0	0	0	0	0	0	0	0	0	0	0	0	0	0	0	0	0	0	0	0	0	1.96619	2.12455	2.23625	2.53408	2.81114	3.20988	3.60182	3.98697	4.36533	4.73689	5.10166	5.45963	5.81081	6.1552	6.49279	6.6477	6.79889	6.94639	7.09017	7.23024	7.36661	7.49926	7.62821	7.75346	7.87499	14.3825
470	0	0	0	0	0	0	0	0	0	0	0	0	0	0	0	0	0	0	0	0	0	0	0	0	0	0	0	0.0120068	0.0131082	0.0141902	0.0152529	0.0162964	0.0173205	0.0183252	0.0193107	0.0202769	0.0212237	0.0221513	0.0408776	0.0592719	0.0773344	0.095065	0.112464	0.12953	0.146265	0.162668	0.178739	0.194478	0.322896
474	0	0	0	0	0	0	0	0	0	0	0	0	0	0	0	0	0	0	0	0	0	0	0	0	0	0	0	0.0292061	0.0448484	0.0602346	0.0753647	0.0902388	0.104857	0.119219	0.133325	0.147175	0.160768	0.174106	0.253092	0.330666	0.406827	0.481576	0.554913	0.626838	0.69735	0.76645	0.834138	0.900413	0.896983
478	0	0	0	0	0	0	0	0	0	0	0	0	0	0	0	0	0	0	0	0	0	0	0	2.72047	2.88333	3.00946	3.40667	3.77497	4.29291	4.80201	5.30227	5.79368	6.27626	6.74999	7.21489	7.67094	8.11815	8.55652	8.77391	8.98617	9.19332	9.39534	9.59225	9.78404	9.97071	10.1523	10.3287	10.5	10.4859
480	0	0	0	0	0	0	0	0	0	0	0	0	0	0	0	0	0	0	0	0	0	0	0	0	0	0	0	0.00402871	0	0	0	0	0	0	0	0	0	0.0638461	0	0	0	0	0	0	0	0	0	0.27478	0
484	0	0	0	0	0	0	0	0	0	0	93.4161	98.8594	104.589	110.618	116.958	123.621	130.62	137.966	145.674	167.934	190.145	215.444	240.629	265.662	290.505	315.117	12.5724	50.1345	59.7067	69.118	78.3684	87.458	96.3867	105.155	113.762	122.208	130.493	138.617	212.477	285.019	356.245	426.153	494.745	562.019	627.977	692.618	755.942	817.949	1086.44
492	0	0	0	0	0	0	0	0	0	0	0	0	0	0	0	0	0	0	0	0	0	0	0	0	0	0	0	0	0	0	0	0	0	0	0	0	0	0	0	0	0	0	0	0	0	0	0	0	0
496	0	0	0	0	0	0	0	0	0	0	0	0	0	0	0	0	0	0	0	0	0	0	0	0	0	0	0	0.148765	0.180396	0.211497	0.24207	0.272112	0.301626	0.33061	0.359065	0.38699	0.414386	0.441253	0.648856	0.852749	1.05293	1.24941	1.44217	1.63123	1.81657	1.99821	2.17614	2.35036	2.60156
498	0	0	0	0	0	0	0	0	0	0	0	0	0	0	0	0	0	0	0	0	0	0	0	0	0	0	0	0.844677	1.04181	1.23566	1.42622	1.61349	1.79747	1.97817	2.15557	2.32969	2.50051	2.66805	5.333	7.9508	10.5214	13.0449	15.5212	17.9504	20.3323	22.6672	24.9548	27.1953	39.0826
500	0	0	0	0	0	0	0	0	0	0	0	0	0	0	0	0	0	0	0	0	0	0	0	0	0	0	0	0	0	0	0	0	0	0	0	0	0	0	0	0	0	0	0	0	0	0	0	0	0
504	0	0	0	0	0	0	0	0	0	0	14.4879	14.8315	15.1683	15.4969	15.8156	16.1225	16.4158	16.6934	16.9531	17.5103	17.9402	16.1264	14.4314	15.1952	12.8061	10.0225	14.0879	10.2433	12.2304	14.1842	16.1046	17.9916	19.8452	21.6655	23.4524	25.2059	26.926	28.6128	33.8693	39.0293	44.0927	49.0595	53.9297	58.7033	63.3803	67.9608	72.4446	76.8319	212.609
508	0	0	0	0	0	0	0	0	0	0	0	0	0	0	0	0	0	0	0	0	2.47912	3.54534	4.55458	5.50734	6.40418	7.24565	8.80734	10.2711	11.5397	12.7866	14.0116	15.2149	16.3963	17.556	18.6939	19.81	20.9043	21.9769	23.4832	24.9597	26.4065	27.8235	29.2107	30.5681	31.8957	33.1936	34.4617	35.7	10.525
512	0	0	0	0	0	0	0	0	0	0	0	0	0	0	0	0	0	0	0	0	0	0	0	0	0	0	0	0	0	0	0	0	0	0	0	0	0	0	2.28	4.52	6.72	8.88	11	13.08	15.12	17.12	19.08	21	20.92
516	0	0	0	0	0	0	0	0	0	0	0	0	0	0	0	0	0	0	0	0	0	0	0	0	0	0	0	0.111536	0.149335	0.18651	0.223061	0.258988	0.294291	0.32897	0.363025	0.396456	0.429263	0.461445	0.525689	0.588736	0.650585	0.711237	0.770691	0.828948	0.886007	0.941869	0.996533	1.05	1.569
520	0	0	0	0	0	0	0	0	0	0	0	0	0	0	0	0	0	0	0	0	0	0	0	0	0	0	0	0	0	0	0	0	0	0	0	0	0	0	0	0	0	0	0	0	0	0	0	0	0
524	0	0	0	0	0	0	0	0	0	0	0	0	0	0	0	0	0	0	0	0	0	0	0	0	0	0	0	0.865407	1.08509	1.30111	1.51348	1.72219	1.92725	2.12865	2.3264	2.5205	2.71094	2.89772	4.26107	5.60006	6.91469	8.20496	9.47087	10.7124	11.9296	13.1224	14.2909	15.435	25.0168
528	0	0	0	0	0	0	0	0	0	0	0	0	0	0	0	0	0	0	0	0	0	0	0	0	0.567421	0.839103	1.09801	1.34415	1.37213	1.39949	1.42622	1.45232	1.47781	1.50266	1.52689	1.5505	1.57348	1.59584	3.07784	4.53359	5.96311	7.36637	8.7434	10.0942	11.4187	12.717	13.9891	15.2349	25.2947
530	0	0	0	0	0	0	0	0	0	0	0	0	0	0	0	0	0	0	0	0	0	0	0	0	0	0	0	0	0	0	0	0	0	0	0	0	0	0	0	0	0	0	0	0	0	0	0	0	0
533	0	0	0	0	0	0	0	0	0	0	0	0	0	0	0	0	0	0	0	0	0	0	0	0	0	0	0	0	0	0	0	0	0	0	0	0	0	0	0	0	0	0	0	0	0	0	0	0	0
540	0	0	0	0	0	0	0	0	0	0	0	0	0	0	0	0	0	0	0	0	0	0	0	0	0	0	0	0	0	0	0	0	0	0	0	0	0	0	0	0	0	0	0	0	0	0	0	0	0.348667
548	0	0	0	0	0	0	0	0	0	0	0	0	0	0	0	0	0	0	0	0	0	0	0	0	0	0	0	0	0	0	0	0	0	0	0	0	0	0	0	0	0	0	0	0	0	0	0	0	0
554	0	0	0	0	0	0	0	0	0	0	0	0	0	0	0	0	0	0	0	0	0	0	0	0	0	0	0	0	0	0	0	0	0	0	0	0	0	0	3.6574	7.25064	10.7797	14.2446	17.6454	20.982	24.2544	27.4626	30.6067	33.6866	38.9989
558	0	0	0	0	0	0	0	0	0	0	0	0	0	0	0	0	0	0	0	0	0	0	0	0	0	0	0	0.0845873	0.0985385	0.112254	0.125733	0.138977	0.151984	0.164756	0.177291	0.189591	0.201655	0.213482	0.380429	0.544414	0.705437	0.863499	1.0186	1.17074	1.31992	1.46613	1.60939	1.74968	4.06704
562	0	0	0	0	0	0	0	0	0	0	0	0	0	0	0	0	0	0	0	0	0	0	0	0	0	0	0	0.6733	0.765459	0.856044	0.945056	1.03249	1.11836	1.20265	1.28537	1.36652	1.44609	1.52409	1.56284	1.60068	1.63761	1.67363	1.70873	1.74292	1.7762	1.80857	1.84002	1.87057	4.03745
566	0	0	0	0	0	0	0	0	0	0	0	0	0	0	0	0	0	0	0	0	0	0	0	0	0	0	0	1.13234	1.23442	1.3347	1.43319	1.52989	1.6248	1.71791	1.80924	1.89877	1.9865	2.07245	2.10432	2.13532	2.16544	2.19468	2.22305	2.25055	2.27717	2.30291	2.32778	2.35178	27.9837
570	0	0	0	0	0	0	0	0	0	0	0	0	0	0	0	0	0	0	0	0	0	0	0	0	0	0	0	0	0	0	0	0	0	0	0	0	0	0	0	0	0	0	0	0	0	0	0	0	0
574	0	0	0	0	0	0	0	0	0	0	0	0	0	0	0	0	0	0	0	0	0	0	0	0	0	0	0	0	0	0	0	0	0	0	0	0	0	0	0	0	0	0	0	0	0	0	0	0	0
578	0	0	0	0	0	0	0	0	0	0	0	0	0	0	0	0	0	0	0	0	0	0	0	0	0	0	0	0	0	0	0	0	0	0	0	0	0	0	0	0	0	0	0	0	0	0	0	0	1.28349
580	0	0	0	0	0	0	0	0	0	0	0	0	0	0	0	0	0	0	0	0	0	0	0	0	0	0	0	0	0	0	0	0	0	0	0	0	0	0	0	0	0	0	0	0	0	0	0	0	0
583	0	0	0	0	0	0	0	0	0	0	0	0	0	0	0	0	0	0	0	0	0	0	0	0	0	0	0	0	0	0	0	0	0	0	0	0	0	0	0	0	0	0	0	0	0	0	0	0	0
584	0	0	0	0	0	0	0	0	0	0	0	0	0	0	0	0	0	0	0	0	0	0	0	0	0	0	0	0	0	0	0	0	0	0	0	0	0	0	0	0	0	0	0	0	0	0	0	0	0
585	0	0	0	0	0	0	0	0	0	0	0	0	0	0	0	0	0	0	0	0	0	0	0	0	0	0	0	0	0	0	0	0	0	0	0	0	0	0	0	0	0	0	0	0	0	0	0	0	0.523
586	0	0	0	0	0	0	190.031	284.035	424.46	634.189	947.359	909.023	867.892	834.907	798.828	760.664	721.251	712.816	697.551	697.045	688.157	636.841	588.272	523.534	527.424	498.871	576.326	630.016	707.227	783.112	857.669	930.9	1002.8	1073.38	1142.63	1210.56	1277.16	1342.43	1639.43	1931.02	2217.2	2497.96	2773.3	3043.23	3307.75	3566.85	3820.53	4068.8	4876.91
591	0	0	0	0	0	0	0	0	0	0	0	0	0	0	0	0	0	0	0	0	0	0	0	0	0	0	0	0.330706	0.371191	0.410979	0.450072	0.488469	0.526171	0.563177	0.599487	0.635102	0.670021	0.704244	1.27575	1.83712	2.38836	2.92947	3.46044	3.98127	4.49198	4.99255	5.48298	5.96328	6.91606
598	0	0	0	0	0	0	0	0	0	0	0	0	0	0	0	0	0	0	0	0	0	0	0	0	0	0	0	0	0	0	0	0	0	0	0	0	0	0	0	0	0	0	0	0	0	0	0	0	0
600	0	0	0	0	0	0	0	0	0	0	0	0	0	0	0	0	0	0	0	0	0	0	0	0	0	0	0	0	0	0	0	0	0	0	0	0	0	0	0	0	0	0	0	0	0	0	0	0	5.23
604	0	0	0	0	0	0	0	0	0	61.9298	63.9037	65.4867	67.0254	68.5065	69.9149	71.2326	72.4388	73.509	74.4139	79.6843	83.9963	84.6641	84.5931	83.718	81.9432	79.1205	23.2161	23.5815	23.2862	22.9926	22.7008	22.4106	22.1222	21.8355	21.5505	21.2672	20.9857	20.7058	31.2413	41.5888	51.7483	61.7198	71.5033	81.0988	90.5063	99.7258	108.757	117.601	251.653
608	0	0	0	0	0	0	0	0	0	0	0	0	0	0	0	0	0	0	0	0	0	0	0	0	0	2.52956	3.95598	6.03865	8.41073	10.7438	13.0378	15.2927	17.5087	19.6856	21.8234	23.9222	25.982	28.0027	68.1533	107.595	146.328	184.353	221.669	258.276	294.175	329.364	363.846	397.618	450.376
612	0	0	0	0	0	0	0	0	0	0	0	0	0	0	0	0	0	0	0	0	0	0	0	0	0	0	0	0	0	0	0	0	0	0	0	0	0	0	0	0	0	0	0	0	0	0	0	0	0
616	0	0	0	0	0	0	0	0	0	0	0	0	0	0	0	0	0	0	0	0	0	0	0	0	0	0	0	0.207094	0.229844	0.252201	0.274165	0.295734	0.31691	0.337692	0.358081	0.378076	0.397677	0.416885	0.908877	1.39218	1.86678	2.33269	2.7899	3.23842	3.67824	4.10937	4.5318	4.94554	20.5279
620	0	0	0	0	0	0	0	0	0	0	6.85471	7.36271	7.109	6.85505	6.60066	5.71101	4.87158	4.6656	4.45816	5.31099	6.05534	7.16566	8.1048	10.5525	7.07323	9.53543	13.847	12.7231	14.0431	15.3402	16.6143	17.8655	19.0938	20.2991	21.4815	22.6409	23.7775	24.8911	45.0072	64.7665	84.1692	103.215	121.904	140.237	158.213	175.832	193.094	210	244.375
624	0	0	0	0	0	0	0	0	0	0	0	0	0	0	0	0	0	0	0	0	0	0	0	0	0	0	0	1.66821	1.72644	1.78352	1.83944	1.89421	1.94782	2.00028	2.05159	2.10174	2.15074	2.19858	2.18952	2.18028	2.17086	2.16126	2.15149	2.14155	2.13143	2.12113	2.11065	2.1	4.707
626	0	0	0	0	0	0	0	0	0	0	0	0	0	0	0	0	0	0	0	0	0	0	0	0	0	0	0	0	0	0	0	0	0	0	0	0	0	0	0	0	0	0	0	0	0	0	0	0	0
630	0	0	0	0	0	0	0	0	0	0	0	0	0	0	0	0	0	0	0	0	0	0	0	0	0	0	0	0.0129032	0.0349342	0.0566082	0.0779252	0.0988852	0.119488	0.139734	0.159623	0.179155	0.19833	0.217148	0.621511	1.01875	1.40886	1.79184	2.16769	2.53642	2.89802	3.25249	3.59984	3.94006	4.75763
634	0	0	0	0	0	0	0	0	0	0	0	0	0	0	0	0	0	0	0	0	0	0	0	0	0	0	0	0	0	0	0	0	0	0	0	0	0	0	0	0	0	0	0	0	0	0	0	0	0.0852057
638	0	0	0	0	0	0	0	0	0	0	0	0	0	0	0	0	0	0	0	0	0	0	0	0	0	0	0	0	0	0	0	0	0	0	0	0	0	0	0	0	0	0	0	0	0	0	0	0	0
642	0	0	0	0	0	0	0	0	0	0	0	0	0	0	0	0	0	0	0	0	0	0	0	0	0	0	0	0.0423826	0.0507722	0.0590211	0.0671291	0.0750964	0.0829229	0.0906086	0.0981535	0.105558	0.112821	0.119944	0.224253	0.326715	0.427328	0.526093	0.62301	0.718078	0.811298	0.90267	0.992194	1.07987	4.58989
643	0	0	0	0	0	0	0	0	0	0	0	0	0	0	0	0	0	0	0	0	0	0.835303	1.22712	1.24324	1.2165	1.53282	1.87297	2.07391	2.57599	3.06971	3.55507	4.03205	4.50068	4.96093	5.41283	5.85635	6.29151	6.71831	9.96083	13.1454	16.2721	19.3409	22.3518	25.3048	28.1998	31.037	33.8162	36.5375	183.086
646	0	0	0	0	0	0	0	0	0	0	0	0	0	0	0	0	0	0	0	0	0	0	0	0	0	0	0	0	0	0	0	0	0	0	0	0	0	0	0	0	0	0	0	0	0	0	0	0	0.697333
654	0	0	0	0	0	0	0	0	0	0	0	0	0	0	0	0	0	0	0	0	0	0	0	0	0	0	0	0	0	0	0	0	0	0	0	0	0	0	0	0	0	0	0	0	0	0	0	0	0
659	0	0	0	0	0	0	0	0	0	0	0	0	0	0	0	0	0	0	0	0	0	0	0	0	0	0	0	0.00154325	0.00184469	0.00214106	0.00243237	0.00271863	0.00299982	0.00327595	0.00354702	0.00381303	0.00407398	0.00432986	0.00591499	0.00747165	0.00899984	0.0104996	0.0119708	0.0134136	0.0148279	0.0162137	0.0175711	0.0189	0.01569
660	0	0	0	0	0	0	0	0	0	0	0	0	0	0	0	0	0	0	0	0	0	0	0	0	0	0	0	0	0	0	0	0	0	0	0	0	0	0	0	0	0	0	0	0	0	0	0	0	0
662	0	0	0	0	0	0	0	0	0	0	0	0	0	0	0	0	0	0	0	0	0	0	0	0	0	0	0	0	0	0	0	0	0	0	0	0	0	0	0	0	0	0	0	0	0	0	0	0	0.174333
666	0	0	0	0	0	0	0	0	0	0	0	0	0	0	0	0	0	0	0	0	0	0	0	0	0	0	0	0	0	0	0	0	0	0	0	0	0	0	0	0	0	0	0	0	0	0	0	0	0
670	0	0	0	0	0	0	0	0	0	0	0	0	0	0	0	0	0	0	0	0	0	0	0	0	0	0	0	0	0	0	0	0	0	0	0	0	0	0	0	0	0	0	0	0	0	0	0	0	0
674	0	0	0	0	0	0	0	0	0	0	0	0	0	0	0	0	0	0	0	0	0	0	0	0	0	0	0	0	0	0	0	0	0	0	0	0	0	0	0	0	0	0	0	0	0	0	0	0	0
678	0	0	0	0	0	0	0	0	0	0	0	0	0	0	0	0	0	0	0	0	0	0	0	0	0	0	0	0.267649	0.32262	0.376669	0.429798	0.482005	0.533291	0.583656	0.6331	0.681623	0.729224	0.775905	0.920242	1.06193	1.20096	1.33735	1.47108	1.60217	1.7306	1.85639	1.97952	2.1	3.48667
682	0	0	0	0	0	0	0	0	0	0	0	0	0	0	0	0	0	0	0	0	0	0	0	0	0	0	0	0.38257	0.539283	0.693418	0.844977	0.993959	1.14036	1.28419	1.42544	1.56412	1.70021	1.83373	3.34601	4.83147	6.29013	7.72197	9.127	10.5052	11.8566	13.1812	14.479	15.75	72.8713
686	0	0	0	0	0	0	0	0	0	0	0	0	0	0	0	3.01062	3.70405	4.55551	5.60055	6.88259	8.45462	10.3813	12.7413	15.6306	19.1659	23.489	28.7722	35.2244	35.658	36.08	36.4905	36.8895	37.2769	37.6528	38.0172	38.37	38.7113	39.041	38.8214	38.5996	38.3758	38.1498	37.9218	37.6916	37.4594	37.225	36.9886	36.75	42.7117
690	0	0	0	0	0	0	0	0	0	0	0	0	0	0	0	0	0	0	0	0	0	0	0	0	0	0	0	0	0	0	0	0	0	0	0	0	0	0	0	0	0	0	0	0	0	0	0	0	0
694	0	0	0	0	0	0	0	0	0	0	0	0	0	0	0	0	0	0	0	0	0	0	0	0	0	0	0	0.143226	0.158038	0.172593	0.18689	0.20093	0.214713	0.228238	0.241505	0.254516	0.267268	0.279764	0.288426	0.296894	0.305167	0.313246	0.32113	0.328819	0.336314	0.343614	0.350719	0.357629	0.356267
702	0	0	0	0	0	0	0	0	0	0	0	0	0	0	0	0	0	0	0	0	0	0	0	0	0	0	0	0	0	0	0	0	0	0	0	0	0	0	0	0	0	0	0	0	0	0	0	0	0
703	0	0	0	0	0	0	0	0	0	0	0	0	0	0	0	0	0	0	0	0	0	0	0	0	0	0	0	0.00663114	0.00727691	0.00791141	0.00853463	0.00914659	0.00974727	0.0103367	0.0109148	0.0114817	0.0120373	0.0125816	0.0213847	0.0300314	0.0385217	0.0468557	0.0550333	0.0630546	0.0709195	0.078628	0.0861802	0.093576	0.0776829
704	0	0	0	0	0	0	0	0	0	0	0	0	0	0	0	0	0	0	0	0	2.78994	3.55203	4.27992	4.97372	5.63356	6.25951	7.64691	8.96367	12.0787	15.1423	18.1545	21.1153	24.0248	26.8828	29.6894	32.4446	35.1484	37.8009	67.9249	97.5148	126.57	155.092	183.079	210.531	237.45	263.834	289.684	315	435.833
705	0	0	0	0	0	0	0	0	0	0	0	0	0	0	0	0	0	0	0	0	0	0	0	0	0	0	0	0.0259429	0.0285251	0.0310623	0.0335545	0.0360018	0.038404	0.0407612	0.0430735	0.0453407	0.047563	0.0497402	0.096272	0.14198	0.186864	0.230924	0.27416	0.316572	0.35816	0.398924	0.438864	0.477981	0.3968
706	0	0	0	0	0	0	0	0	0	0	0	0	0	0	0	0	0	0	0	0	0	0	0	0	0	0	0	0.654401	0.986727	1.31361	1.63505	1.95104	2.26159	2.56669	2.86635	3.16057	3.44934	3.73266	4.99743	6.23945	7.4587	8.6552	9.82894	10.9799	12.1081	13.2136	14.2963	15.3563	17.8474
710	0	0	0	0	0	0	0	0	0	0	0	0	0	0	0	0	0	0	0	0	0	0	0	0	0	0	2.30121	6.42374	7.61869	8.79353	9.94828	11.0829	12.1975	13.2919	14.3662	15.4205	16.4546	17.4686	61.6411	105.036	147.653	189.493	230.555	270.839	310.346	349.075	387.026	424.2	493.015
716	0	0	0	0	0	0	0	0	0	0	0	0	0	0	0	0	0	0	0	0	0	0	0	0	0	0	0	0.698602	0.80264	0.904909	1.00541	1.10414	1.20111	1.2963	1.38973	1.48139	1.57129	1.65941	1.90228	2.14064	2.37448	2.60381	2.82863	3.04893	3.26472	3.47599	3.68275	3.885	5.9631
724	0	0	0	0	0	0	0	0	0	0	41.6424	43.5152	41.433	39.3055	34.9536	30.5699	31.6172	32.6306	33.6068	34.5418	38.6529	46.9411	63.531	46.1852	54.0398	69.8672	64.9118	72.1804	78.7454	85.1953	91.5299	97.7494	103.854	109.843	115.716	121.475	127.119	132.647	224.058	313.844	402.007	488.546	573.462	656.753	738.42	818.463	896.883	973.678	1123.55
732	0	0	0	0	0	0	0	0	0	0	0	0	0	0	0	0	0	0	0	0	0	0	0	0	0	0	0	0	0	0	0	0	0	0	0	0	0	0	0	0	0	0	0	0	0	0	0	0	0
736	0	0	0	0	0	0	0	0	0	0	21.3028	21.7019	22.1014	22.501	22.9002	23.2983	23.695	24.0895	24.4812	25.9184	27.2888	27.6983	28.0722	29.845	31.527	33.1172	34.8853	36.549	43.2501	49.8384	56.3139	62.6766	68.9265	75.0636	81.0879	86.9994	92.7981	98.484	110.665	122.617	134.34	145.835	157.101	168.138	178.947	189.527	199.878	210	285.128
740	0	0	0	0	0	0	0	0	0	0	0	0	0	0	0	0	0	0	0	0	0	0	0	0	0	0	0	0.085204	0.0951387	0.104902	0.114494	0.123915	0.133165	0.142244	0.151151	0.159887	0.168452	0.176845	0.180577	0.184216	0.187762	0.191216	0.194578	0.197847	0.201024	0.204109	0.207101	0.21	0.174333
744	0	0	0	0	0	0	0	0	0	0	0	0	0	0	0	0	0	0	0	0	0	0	0	0	0	0	0	0	0	0	0	0	0	0	0	0	0	0	0	0	0	0	0	0	0	0	0	0	0
748	0	0	0	0	0	0	0	0	0	0	0	0	0	0	0	0	0	0	0	0	0	0	0	0	0	0	0	0	0	0	0	0	0	0	0	0	0	0	0	0	0	0	0	0	0	0	0	0	5.64844
752	0	0	0	0	0	0	0	0	0	0	0	0	0	0	0	0	0	0	0	0	0	0	0	0	0	0	0	0	0	0	0	0	0	0	0	0	0	0	0	0	0	0	0	0	0	0	0	0	0.964767
756	0	0	0	0	0	0	0	0	0	0	0	0	0	0	0	0	0	0	0	0	0	0	0	0	0	0	0	1.13823	1.22426	1.30876	1.39172	1.47314	1.55304	1.63139	1.70822	1.78351	1.85726	1.92948	3.60305	5.24697	6.86123	8.44584	10.0008	11.5261	13.0217	14.4877	15.9241	17.3307	17.2647
760	0	0	0	0	0	0.00867675	18.4689	20.6	17.4787	20.6831	22.9408	30.8461	41.4611	55.709	43.6481	34.1854	26.7637	20.9448	16.3842	29.4958	14.0966	14.6855	15.2491	15.7867	12.4392	13.1253	15.0781	14.9159	15.5305	16.1334	16.7243	17.3034	17.8707	18.4262	18.9698	19.5016	20.0215	20.5296	25.299	29.9816	34.5774	39.0863	43.5085	47.8439	52.0924	56.2542	60.3291	64.3173	145.066
762	0	0	0	0	0	0	0	0	0	0	7.41185	7.68433	7.95814	8.23191	8.50406	8.7727	9.03557	9.29	9.53279	9.5649	9.55086	9.48886	9.76715	9.94715	10.0226	9.98451	10.4145	10.5922	13.2081	15.7804	18.3091	20.7943	23.2359	25.634	27.9885	30.2995	32.5669	34.7907	46.129	57.2631	68.193	78.9186	89.44	99.7572	109.87	119.779	129.483	138.984	170.203
764	0	0	0	0	0	0	0	0	0	0	0	0	0	0	0	0	0	0	0	0	0	0	0	0	0	0	0	1.06793	1.34896	1.62533	1.89702	2.16404	2.42639	2.68407	2.93708	3.18542	3.42909	3.66809	7.76861	11.7966	15.7521	19.6352	23.4457	27.1837	30.8492	34.4423	37.9628	41.4108	257.282
768	0	0	0	0	0	0	0	0	0	0	0	0	0	0	0	0	0	0	0	0	0	0	0	0	0	0	0	0.552067	0.592142	0.6315	0.670139	0.708062	0.745266	0.781753	0.817523	0.852575	0.886909	0.920525	0.919309	0.917973	0.916518	0.914944	0.913251	0.911439	0.909508	0.907458	0.905288	0.903	0.89956
772	0	0	0	0	0	0	0	0	0	0	0	0	0	0	0	0	0	0	0	0	0	0	0	0	0	0	0	0	0	0	0	0	0	0	0	0	0	0	0	0	0	0	0	0	0	0	0	0	0
776	0	0	0	0	0	0	0	0	0	0	0	0	0	0	0	0	0	0	0	0	0	0	0	0	0	0	0	0	0	0	0	0	0	0	0	0	0	0	0	0	0	0	0	0	0	0	0	0	0
780	0	0	0	0	0	0	0	0	0	0	0	0	0	0	0	0	0	0	0	0	0	0	0	0	0	0	0	0	0	0	0	0	0	0	0	0	0	0	0	0	0	0	0	0	0	0	0	0	0.296367
784	0	0	0	0	0	0	0	0	0	0	0	0	0	0	0	0	0	0	0	0	0	0	0	0	0	0	0	1.87268	1.87449	1.87602	1.87729	1.87828	1.87901	1.87946	1.87964	1.87955	1.87919	1.87856	2.26594	2.64623	3.01944	3.38557	3.74462	4.09658	4.44146	4.77926	5.10998	5.43361	9.46854
788	0	0	0	0	0	0	0	0	0	0	32.8708	36.0597	39.0555	36.1532	33.3611	30.6774	28.1005	27.3372	31.5672	31.4897	31.377	28.9448	29.5708	28.6847	22.2479	21.5572	26.0943	20.2029	22.17	24.1029	26.0014	27.8655	29.6954	31.4908	33.252	34.9788	36.6713	38.3295	44.6466	50.8471	56.9309	62.898	68.7485	74.4822	80.0993	85.5998	90.9835	96.2506	95.4185
792	0	0	0	1.06175	3.14388	19.6493	31.7672	42.6506	80.8194	113.507	138.729	146.413	153.488	138.622	124.341	110.644	97.5341	103.903	109.621	116.872	123.268	86.6653	98.0366	107.996	82.8565	84.5833	101.793	100.499	107.423	114.223	120.898	127.448	133.874	140.175	146.351	152.403	158.33	164.132	191.463	218.289	244.611	270.428	295.741	320.549	344.852	368.651	391.946	414.736	493.849
795	0	0	0	0	0	0	0	0	0	0	19.4558	20.3708	21.3202	22.3044	23.3239	24.3791	25.47	26.5968	27.7594	27.8716	27.9433	29.094	30.1424	31.0898	32.2304	34.1077	38.5734	41.3672	47.7047	53.9346	60.057	66.0718	71.9791	77.7788	83.4709	89.0555	94.5325	99.902	124.437	148.526	172.17	195.368	218.12	240.426	262.287	283.702	304.672	325.195	425.174
796	0	0	0	0	0	0	0	0	0	0	0	0	0	0	0	0	0	0	0	0	0	0	0	0	0	0	0	0	0	0	0	0	0	0	0	0	0	0	0	0	0	0	0	0	0	0	0	0	0
798	0	0	0	0	0	0	0	0	0	0	0	0	0	0	0	0	0	0	0	0	0	0	0	0	0	0	0	0	0	0	0	0	0	0	0	0	0	0	0	0	0	0	0	0	0	0	0	0	0
800	0	0	0	0	0	0	0	0	0	0	0	0	0	0	0	0	0	0	0	0	0	0	0	0	0	0	0	0	0	0	0	0	0	0	0	0	0	0	0	0	0	0	0	0	0	0	0	0	0.224823
804	0	0	0	0	0	0	0	0	0	0	0	0	0	0	0	0	0	0	0	0	0	0	0	0	0	0	0	0.00726248	0.00830217	0.00932415	0.0103284	0.011315	0.0122839	0.013235	0.0141685	0.0150842	0.0159822	0.0168626	0.0402096	0.0631445	0.0856673	0.107778	0.129476	0.150762	0.171636	0.192098	0.212148	0.231786	61.8751
807	0	0	0	0	0	0	0	0	0	0	0	0	0	0	0	0	0	0	0	0	0	0	0	0	0	0	0	0	0	0	0	0	0	0	0	0	0	0	0	0	0	0	0	0	0	0	0	0	0
818	0	0	0	0	65.6761	290.845	1295	1460	1530	1597.5	1750	1823.82	1894.12	1960.88	2024.12	2083.82	2140	2192.65	2241.76	2287.35	2329.41	2367.94	2402.94	2434.41	2462.35	2486.76	2616.68	2738.04	2734.15	2729.96	2725.48	2720.71	2715.65	2710.3	2704.66	2698.73	2692.51	2686	2679.2	2672.11	2664.72	2657.05	2649.09	2640.83	2632.29	2623.45	2614.33	2604.91	2610.18
826	0	0	0	0	0	0	0	0	0	0	0	0	0	0	0	0	0	0	0	0	0	0	0	0	0	0	0	0	0	0	0	0	0	0	0	0	0	0	0	0	0	0	0	0	0	0	0	0	10.5359
834	0	0	0	0	0	0	0	0	0	0	0	0	0	0	0	0	0	0	0	0	0	0	0	0	0	0	0	0	0	0	0	0	0	0	0	0	0	0	0	0	0	0	0	0	0	0	0	0	3.48667
840	0	0	0	0	0	0	0	0	0	0	0	0	0	0	0	0	0	0	6.27603	6.9471	7.59089	8.06689	8.79878	9.38655	10.2704	11.0421	5.10356	6.32125	7.71264	9.08077	10.4256	11.7473	13.0456	14.3207	15.5726	16.8012	18.0065	19.1886	376.44	727.422	1072.13	1410.57	1742.74	2068.64	2388.27	2701.63	3008.72	3309.53	5421.16
850	0	0	0	0	0	0	0	0	0	0	0	0	0	0	0	0	0	0	0	0	0	0	0	0	0	0	0	0	0	0	0	0	0	0	0	0	0	0	0	0	0	0	0	0	0	0	0	0	0
854	0	0	0	0	0	0	0	0	0	0	0	0	0	0	0	0	0	0	0	0	0	0	0	0	0	0	0	0.322203	0.345434	0.368248	0.390647	0.412629	0.434195	0.455344	0.476077	0.496394	0.516295	0.53578	0.535009	0.534169	0.533262	0.532286	0.531242	0.53013	0.52895	0.527702	0.526385	0.525	0.7845
858	0	0	0	0	0	0	0	0	0	0	0	0	0	0	0	0	0	0	0	0	0	0	0	0	0	0	0	0	0	0	0	0	0	0	0	0	0	0	0	0	0	0	0	0	0	0	0	0	2.67884
860	0	0	0	0	0	0	0	0	0	0	49.9909	52.8357	55.8242	58.9621	62.2549	65.7083	69.3277	73.1189	77.0872	79.0193	80.8333	85.6172	90.1712	94.4928	98.5796	103.248	115.679	127.51	146.976	166.112	184.918	203.393	221.537	239.352	256.835	273.989	290.812	307.304	382.81	456.944	529.707	601.098	671.117	739.765	807.042	872.947	937.48	1000.64	1141.26
862	0	0	0	0	0	0	0	0	0	0	0	0	0	0	0	0	0	0	0	0	0	0	0	0	0	0	0	0.174302	0.174276	0.174228	0.174159	0.174067	0.173953	0.173817	0.173659	0.173479	0.173277	0.173053	0.195404	0.217338	0.238852	0.259949	0.280626	0.300885	0.320726	0.340148	0.359151	0.377736	31.6717
876	0	0	0	0	0	0	0	0	0	0	0	0	0	0	0	0	0	0	0	0	0	0	0	0	0	0	0	0	0	0	0	0	0	0	0	0	0	0	0	0	0	0	0	0	0	0	0	0	0
882	0	0	0	0	0	0	0	0	0	0	0	0	0	0	0	0	0	0	0	0	0	0	0	0	0	0	0	0	0	0	0	0	0	0	0	0	0	0	0	0	0	0	0	0	0	0	0	0	0
887	0	0	0	0	0	0	0	0	0	0	0	0	0	0	0	0	0	0	0	0	0	0	0	0	0	0	0	22.2128	23.66	25.0809	26.4757	27.8442	29.1865	30.5027	31.7926	33.0563	34.2938	35.5051	41.0396	46.4716	51.8011	57.0281	62.1526	67.1746	72.094	76.911	81.6254	86.2373	101.229
891	0	0	0	0	0	0	0	0	0	0	0	0	0	0	0	0	0	0	0	0	0	0	0	0	0	0	0	0	0	0	0	0	0	0	0	0	0	0	0	0	0	0	0	0	0	0	0	0	0
894	0	0	0	0	0	0	0	0	0	0	0	0	0	0	0	0	0	0	0	0	0	0	0	0	0	0	0	0	0	0	0	0	0	0	0	0	0	0	0	0	0	0	0	0	0	0	0	0	0.348667
[truncated: 108 more columns]

## Sheet: lower2
ISO1	y-10000	y-9000	y-8000	y-7000	y-6000	y-5000	y-4000	y-3000	y-2000	y-1000	y0	y100	y200	y300	y400	y500	y600	y700	y800	y900	y1000	y1100	y1200	y1300	y1400	y1500	y1600	y1700	y1710	y1720	y1730	y1740	y1750	y1760	y1770	y1780	y1790	y1800	y1810	y1820	y1830	y1840	y1850	y1860	y1870	y1880	y1890	y1900	y1910
4	0	0	0	0	0	0	0	0	0	0	0	0	0	0	0	0	0	0	0	0.233105	0.671761	1.15924	1.67377	1.47392	1.88565	2.31821	3.25413	3.58076	5.86039	8.30436	10.9127	13.6853	16.6223	19.7236	22.9893	26.4193	30.0137	33.7723	74.6502	117.745	163.058	210.588	260.335	312.3	366.482	422.882	481.499	542.333	650.938
8	0	0	0	0	0	0	0	0	0	0	0	0	0	0	0	0	0	0	0	0	0	0	0	0	0	0	0	0.220798	0.250489	0.281784	0.314684	0.349188	0.385297	0.423011	0.462329	0.503251	0.545778	0.58991	1.13216	1.70361	2.30424	2.93406	3.59307	4.28126	4.99865	5.74523	6.52099	7.32594	13.8465
12	0	0	0	0	0	0	0	0	0	0	0	0	0	0	0	0	0	0	0	0.843992	2.65699	4.18716	5.53377	6.10684	6.2952	7.33071	12.2362	10.3879	13.0073	15.7961	18.7545	21.8824	25.1799	28.6468	32.2833	36.0893	40.0649	44.2099	54.0499	64.3664	75.1594	86.4289	98.1748	110.397	123.096	136.272	149.924	164.052	165.53
16	0	0	0	0	0	0	0	0	0	0	0	0	0	0	0	0	0	0	0	0	0	0	0	0	0	0	0	0	0	0	0	0	0	0	0	0	0	0	0	0	0	0	0	0	0	0	0	0	0
20	0	0	0	0	0	0	0	0	0	0	0	0	0	0	0	0	0	0	0	0	0	0	0	0	0	0	0	0	0	0	0	0	0	0	0	0	0	0	0	0	0	0	0	0	0	0	0	0	0
24	0	0	0	0	0	0	0	0	0	0	0	0	0	0	0	0	0	0	0	0	0	0	0	0	0.268778	0.363549	0.446337	0.536371	0.783291	1.04756	1.32916	1.62811	1.94441	2.27805	2.62903	2.99736	3.38302	3.78604	4.68604	5.63003	6.61801	7.64999	8.72595	9.8459	11.0098	12.2178	13.4697	14.7656	17.3797
28	0	0	0	0	0	0	0	0	0	0	0	0	0	0	0	0	0	0	0	0	0	0	0	0	0	0	0	0	0	0	0	0	0	0	0	0	0	0	0	0	0	0	0	0	0	0	0	0	0
31	0	0	0	0	0	0	0	0	0	0	0	0	0	0	0	0	0	0	0	0.532722	1.6893	4.23594	7.93065	12.7833	12.5359	18.5726	25.7899	34.1973	39.215	44.5135	50.0928	55.9528	62.0936	68.5151	75.2174	82.2004	89.4642	97.0088	135.963	176.927	219.901	264.886	311.88	360.885	411.9	464.925	519.96	577.005	565.448
32	0	0	0	0	0	0	0	0	0	0	0	0	0	0	0	0	0	0	0	0.0586255	0.201002	0.38286	0.612577	0.900113	1.2573	1.69817	2.23935	2.90049	5.70241	8.71095	11.9261	15.3478	18.9762	22.8112	26.8527	31.1009	35.5557	40.2171	91.2295	145.012	201.565	260.888	322.981	387.845	455.478	525.882	599.056	675	680.738
36	0	0	0	0	0	0	0	0	0	0	0	0	0	0	0	0	0	0	0	0	0	0	0	0	0	0	0	0	0	0	0	0	0	0	0	0	0	0	1.57688	2.1643	2.78111	3.4273	4.10287	4.80783	5.54217	6.3059	7.09901	34.3454	124.113
40	0	0	0	0	0	0	0	0	0	0	0	0	0	0	0	0	0	0	0	0	0	0	0	0	0	0	0	0.131043	0.169382	0.210267	0.253699	0.299676	0.348199	0.399268	0.452883	0.509045	0.567752	0.629005	0	0	0	0	0	0	0	0	0	6.26758	0.113321
44	0	0	0	0	0	0	0	0	0	0	0	0	0	0	0	0	0	0	0	0	0	0	0	0	0	0	0	0	0	0	0	0	0	0	0	0	0	0	0	0	0	0	0	0	0	0	0	0	0
48	0	0	0	0	0	0	0	0	0	0	0	0	0	0	0	0	0	0	0	0	0	0	0	0	0	0	0	0.074715	0.0891709	0.104509	0.120729	0.137831	0.155815	0.174682	0.19443	0.215061	0.236574	0.258968	0.345571	0.436573	0.531976	0.631779	0.735982	0.844585	0.957589	1.07499	1.1968	1.323	1.26363
50	0	0	0	0	0	0	0	0	0	0	0	0	0	0	0	0	0	0	0	0	0	0	0	0	0	0	0	0	0	0	0	0	0	0	0	0	0	0	0	0	0	0	0	0	0	0	0	0	64.468
51	0	0	0	0	0	0	0	0	0	0	0	0	0	0	0	0	0	0	0	0	0	0	0	0	0	0	0	0.183213	0.235831	0.291932	0.351518	0.414587	0.481139	0.551176	0.624696	0.7017	0.782188	0.86616	1.79582	2.77576	3.80597	4.88645	6.0172	7.19823	8.42953	9.71111	11.043	12.4251	23.2861
52	0	0	0	0	0	0	0	0	0	0	0	0	0	0	0	0	0	0	0	0	0	0	0	0	0	0	0	0	0	0	0	0	0	0	0	0	0	0	0	0	0	0	0	0	0	0	0	0	0.151333
56	0	0	0	0	0	0	0	0	0	0	0	0	0	0	0	0	0	0	0	0	0	0	0	0	0	0	0	0.0405448	0.049223	0.0584439	0.0682077	0.0785142	0.0893635	0.100756	0.112691	0.125168	0.138189	0.151752	0.292697	0.441232	0.597356	0.761069	0.932372	1.11126	1.29775	1.49182	1.69348	1.90273	1.5997
60	0	0	0	0	0	0	0	0	0	0	0	0	0	0	0	0	0	0	0	0	0	0	0	0	0	0	0	0	0	0	0	0	0	0	0	0	0	0	0	0	0	0	0	0	0	0	0	0	0
64	0	0	0	0	0	0	0	0	0	0	0	0	0	0	0	0	0	0	0	0	0	0	0	0	0	0	0.822457	1.05922	1.08203	1.10334	1.12314	1.14143	1.15823	1.17351	1.18729	1.19957	1.21034	1.21961	1.70501	2.21544	2.75091	3.3114	3.89692	4.50748	5.14306	5.80368	6.48932	7.2	7.264
68	0	0	0	0	0	0	0	0	0	0	0	0	0	0	0	0	0	0	0	0	0	0	0	0	0	0	0	0.28039	0.333335	0.38949	0.448855	0.51143	0.577214	0.646209	0.718414	0.793828	0.872453	0.954287	1.0994	1.25105	1.40926	1.57401	1.74531	1.92315	2.10754	2.29848	2.49597	2.7	13.166
70	0	0	0	0	0	0	0	0	0	0	0	0	0	0	0	0	0	0	0	0	0	0	0	0	0	0	0	0.0452554	0.0522335	0.0596091	0.0673823	0.075553	0.0841212	0.093087	0.10245	0.112211	0.122369	0.132925	0.267051	0.408417	0.557023	0.71287	0.875957	1.04629	1.22385	1.40866	1.60071	1.8	1.51333
72	0	0	0	0	0	0	0	0	0	0	0	0	0	0	0	0	0	0	0	0	0	0	0	0	0	0	0	0	0	0	0	0	0	0	0	0	0	0	0	0	0	0	0	0	0	0	0	0	0.0652027
76	0	0	0	0	0	0	0	0	0	0	0	0	0	0	0	0	0	0	0	0	0	0	0	0	0	0	0	0.008	0.010868	0.013932	0.017192	0.020648	0.0243	0.028148	0.032192	0.036432	0.040868	0.0455	0.07092	0.09768	0.12578	0.15522	0.186	0.21812	0.25158	0.28638	0.32252	0.36	74.456
84	0	0	0	0	0	0	0	0	0	0	0	0	0	0	0	0	0	0	0	0	0	0	0	0	0	0	0	0	0	0	0	0	0	0	0	0	0	0	0	0	0	0	0	0	0	0	0	0	0
86	0	0	0	0	0	0	0	0	0	0	0	0	0	0	0	0	0	0	0	0	0	0	0	0	0	0	0	0	0	0	0	0	0	0	0	0	0	0	0	0	0	0	0	0	0	0	0	0	0
90	0	0	0	0	0	0	0	0	0	0	0	0	0	0	0	0	0	0	0	0	0	0	0	0	0	0	0	0	0	0	0	0	0	0	0	0	0	0	0	0	0	0	0	0	0	0	0	0	0
92	0	0	0	0	0	0	0	0	0	0	0	0	0	0	0	0	0	0	0	0	0	0	0	0	0	0	0	0	0	0	0	0	0	0	0	0	0	0	0	0	0	0	0	0	0	0	0	0	0
96	0	0	0	0	0	0	0	0	0	0	0	0	0	0	0	0	0	0	0	0	0	0	0	0	0	0	0	0	0	0	0	0	0	0	0	0	0	0	0	0	0	0	0	0	0	0	0	0	0
100	0	0	0	0	0	0	0	0	0	0	0	0	0	0	0	0	0	0	0	0	0	0	0	0	0	0	0	0.83811	0.973825	1.1174	1.26884	1.42813	1.59529	1.77031	1.95319	2.14393	2.34253	2.54899	4.51964	6.59572	8.77723	11.0642	13.4566	15.9544	18.5576	21.2663	24.0804	27	36.3997
104	0	0	0	0	0	0	0	0	0	0	0	0	0	0	0	0	0	0	0	0.141396	0.446506	0.930205	1.56272	1.94221	2.82399	3.86947	5.02283	6.325	7.5634	8.8776	10.2676	11.7334	13.275	14.8924	16.5856	18.3546	20.1994	22.12	39.1608	57.1132	75.9772	95.7528	116.44	138.039	160.549	183.971	208.305	233.55	277.47
108	0	0	0	0	0	0	0	0	0	0	0	0	0	0	0	0	0	0	0	0	0	0	0	0	0	0	0	0	0	0	0	0	0	0	0	0	0	0	0	0	0	0	0	0	0	0	0	0	2.11867
112	0	0	0	0	0	0	0	0	0	0	0	0	0	0	0	0	0	0	0	0	0	0	0	0	0	0	0	0.0646343	0.0831969	0.102988	0.124009	0.146259	0.169737	0.194445	0.220382	0.247547	0.275942	0.305566	0.633534	0.979238	1.34268	1.72385	2.12276	2.53941	2.97379	3.4259	3.89576	4.38334	6.49999
116	0	0	0	0	0	0	0	0	0	0	0	0	0	0	0	0	0	0	0	0	0	0	0	0	0	0	0	0.295434	0.384539	0.479589	0.580585	0.687526	0.800412	0.919243	1.04402	1.17474	1.31141	1.45402	2.2504	3.08872	3.96897	4.89116	5.85528	6.86134	7.90934	8.99926	10.1311	11.3049	17.9228
120	0	0	0	0	0	0	0	0	0	0	0	0	0	0	0	0	0	0	0	0	0	0	0	0	0	0	0	0	0	0	0	0	0	0	0	0	0	0	0	0	0	0	0	0	0	0	0	0	0.302667
124	0	0	0	0	0	0	0	0	0	0	0	0	0	0	0	0	0	0	0	0	0	0	0	0	0	0	0	0	0	0	0	0	0	0	0	0	0	0	2.3328	4.7952	7.3872	10.1088	12.96	15.9408	19.0512	22.2912	25.6608	29.16	61.2838
132	0	0	0	0	0	0	0	0	0	0	0	0	0	0	0	0	0	0	0	0	0	0	0	0	0	0	0	0	0	0	0	0	0	0	0	0	0	0	0	0	0	0	0	0	0	0	0	0	0.198258
136	0	0	0	0	0	0	0	0	0	0	0	0	0	0	0	0	0	0	0	0	0	0	0	0	0	0	0	0	0	0	0	0	0	0	0	0	0	0	0	0	0	0	0	0	0	0	0	0	0
140	0	0	0	0	0	0	0	0	0	0	0	0	0	0	0	0	0	0	0	0	0	0	0	0	0	0	0	0	0	0	0	0	0	0	0	0	0	0	0	0	0	0	0	0	0	0	0	0	0
144	0	0	0	0	0	0	0	0	0	0	0	0	0	0	0	0	0	0	0	0.0399408	0.124729	0.22779	0.344352	0.416232	0.471201	0.576168	0.795601	1.02914	1.1364	1.24874	1.36617	1.48868	1.61628	1.74896	1.88672	2.02957	2.1775	2.33052	7.70065	13.3654	19.3248	25.5789	32.1276	38.9709	46.1089	53.5415	61.2688	69.2907	97.2867
148	0	0	0	0	0	0	0	0	0	0	0	0	0	0	0	0	0	0	0	0	0	0	0	0	0	0	0	0.123926	0.15103	0.179838	0.210349	0.242564	0.276483	0.312105	0.349432	0.388461	0.429195	0.471631	0.498909	0.526953	0.555764	0.585342	0.615687	0.646798	0.678676	0.711321	0.744733	0.778912	1.57167
152	0	0	0	0	0	0	0	0	0	0	0	0	0	0	0	0	0	0	0	1.14094	3.55108	6.31616	9.33053	12.524	15.8124	19.0918	20.8393	22.169	26.2992	30.6788	35.308	40.1866	45.3148	50.6924	56.3196	62.1962	68.3223	74.6979	101.405	129.477	158.914	189.716	221.884	255.417	290.314	326.577	364.206	403.199	340.172
156	0	0	0	0	0	0	0	0	0	0	0	0	0	0	0	0	0	0	0	34.1387	104.874	178.887	256.176	336.744	420.588	635.887	755.865	881.75	1028.06	1182.91	1346.31	1518.24	1698.72	1887.74	2085.3	2291.4	2506.04	2729.23	3304.16	3906.7	4536.84	5194.6	5879.96	6592.93	7333.51	8101.7	8897.5	9720.9	11387
158	0	0	0	0	0	0	0	0	0	0	0	0	0	0	0	0	0	0	0	0	0	0	0.325633	0.456759	0.595027	0.73256	0.780264	3.9788	5.20148	6.50596	7.89225	9.36035	10.9103	12.542	14.2555	16.0508	17.928	19.887	27.3594	35.2154	43.455	52.0782	61.085	70.4753	80.2491	90.4066	100.948	111.872	140.863
162	0	0	0	0	0	0	0	0	0	0	0	0	0	0	0	0	0	0	0	0	0	0	0	0	0	0	0	0	0	0	0	0	0	0	0	0	0	0	0	0	0	0	0	0	0	0	0	0	0
166	0	0	0	0	0	0	0	0	0	0	0	0	0	0	0	0	0	0	0	0	0	0	0	0	0	0	0	0	0	0	0	0	0	0	0	0	0	0	0	0	0	0	0	0	0	0	0	0	0
170	0	0	0	0	0	0	0	0	0	0	0	0	0	0	0	0	0	0	0	0.0637531	0.202152	0.368732	0.55487	0.754392	0.95964	2.50314	2.19025	1.9	2.08	2.268	2.464	2.668	2.88	3.1	3.328	3.564	3.808	4.06	4.4784	4.9136	5.3656	5.8344	6.32	6.8224	7.3416	7.8776	8.4304	9	41.768
174	0	0	0	0	0	0	0	0	0	0	0	0	0	0	0	0	0	0	0	0	0	0	0	0	0	0	0	0	0	0	0	0	0	0	0	0	0	0	0	0	0	0	0	0	0	0	0	0	0
175	0	0	0	0	0	0	0	0	0	0	0	0	0	0	0	0	0	0	0	0	0	0	0	0	0	0	0	0	0	0	0	0	0	0	0	0	0	0	0	0	0	0	0	0	0	0	0	0	0
178	0	0	0	0	0	0	0	0	0	0	0	0	0	0	0	0	0	0	0	0	0	0	0	0	0	0	0	0	0	0	0	0	0	0	0	0	0	0	0	0	0	0	0	0	0	0	0	0	0
180	0	0	0	0	0	0	0	0	0	0	0	0	0	0	0	0	0	0	0	0	0	0	0	0	0	0	0	0	0	0	0	0	0	0	0	0	0	0	0	0	0	0	0	0	0	0	0	0	0
184	0	0	0	0	0	0	0	0	0	0	0	0	0	0	0	0	0	0	0	0	0	0	0	0	0	0	0	0	0	0	0	0	0	0	0	0	0	0	0	0	0	0	0	0	0	0	0	0	0
188	0	0	0	0	0	0	0	0	0	0	0	0	0	0	0	0	0	0	0	0	0	0	0	0	0	0	0	0.0976625	0.121919	0.14774	0.175127	0.204079	0.234597	0.26668	0.300328	0.335542	0.372321	0.410665	1.10765	1.8427	2.61582	3.42701	4.27627	5.16359	6.08899	7.05246	8.05399	9.0936	11.58
191	0	0	0	0	0	0	0	0	0	0	0	0	0	0	0	0	0	0	0	0	0	0	0	0	0	0	0	0.0470131	0.0539107	0.0611943	0.0688637	0.0769191	0.0853605	0.0941877	0.103401	0.113	0.122985	0.133356	0.26745	0.408781	0.557351	0.713158	0.876203	1.04649	1.22401	1.40877	1.60076	1.8	1.51333
192	0	0	0	0	0	0	0	0	0	0	0	0	0	0	0	0	0	0	0	0	0	0	0	0	0	0	0	0.0485364	0.0764603	0.106383	0.138304	0.172224	0.208142	0.24606	0.285975	0.32789	0.371803	0.417715	0.835651	1.27614	1.73919	2.22479	2.73295	3.26367	3.81694	4.39276	4.99114	5.61208	11.953
196	0	0	0	0	0	0	0	0	0	0	0	0	0	0	0	0	0	0	0	0	0	0	0	0	0	0	0	0.576218	0.629421	0.684944	0.742787	0.802949	0.86543	0.930232	0.997352	1.06679	1.13855	1.21263	1.67364	2.15833	2.66671	3.19877	3.75453	4.33396	4.93709	5.5639	6.2144	6.88858	9.13813
203	0	0	0	0	0	0	0	0	0	0	0	0	0	0	0	0	0	0	0	0	0	0	0	0	0	0	0	0.0891038	0.0915875	0.0939882	0.0963058	0.0985402	0.100692	0.10276	0.104745	0.106647	0.108466	0.110202	0.222409	0.340676	0.465001	0.595385	0.731828	0.87433	1.02289	1.17751	1.33819	1.50493	1.26525
204	0	0	0	0	0	0	0	0	0	0	0	0	0	0	0	0	0	0	0	0	0	0	0	0	0	0	0	0	0	0	0	0	0	0	0	0	0	0	0	0	0	0	0	0	0	0	0	0	0
208	0	0	0	0	0	0	0	0	0	0	0	0	0	0	0	0	0	0	0	0	0	0	0	0	0	0	0	0.101222	0.113111	0.125603	0.138699	0.152397	0.166699	0.181603	0.197111	0.213222	0.229936	0.247253	0.556257	0.882036	1.22459	1.58392	1.96002	2.3529	2.76255	3.18897	3.63217	4.09215	6.19279
212	0	0	0	0	0	0	0	0	0	0	0	0	0	0	0	0	0	0	0	0	0	0	0	0	0	0	0	0	0	0	0	0	0	0	0	0	0	0	0	0	0	0	0	0	0	0	0	0	0
214	0	0	0	0	0	0	0	0	0	0	0	0	0	0	0	0	0	0	0	0	0	0	0	0	0	0	0	0.0185507	0.0213482	0.0243038	0.0274175	0.0306894	0.0341194	0.0377074	0.0414536	0.0453579	0.0494203	0.0536409	0.119233	0.188384	0.261093	0.337362	0.417189	0.500575	0.58752	0.678024	0.772087	0.869708	16.8176
218	0	0	0	0	0	0	0	0	0	0	0	0	0	0	0	0	0	0	0	0	0	0	0	0	0	0	0	0.0930106	0.0963111	0.0995794	0.102815	0.106019	0.10919	0.112329	0.115436	0.11851	0.121553	0.124562	0.13608	0.14804	0.160441	0.173285	0.186572	0.2003	0.21447	0.229083	0.244138	0.259635	48.2411
222	0	0	0	0	0	0	0	0	0	0	0	0	0	0	0	0	0	0	0	0	0	0	0	0	0	0	0	0.00759824	0.00956491	0.0116595	0.013882	0.0162323	0.0187106	0.0213168	0.0240509	0.0269129	0.0299028	0.0330206	0.0761352	0.121593	0.169393	0.219536	0.272022	0.326851	0.384023	0.443537	0.505395	0.569595	2.20286
226	0	0	0	0	0	0	0	0	0	0	0	0	0	0	0	0	0	0	0	0	0	0	0	0	0	0	0	0	0	0	0	0	0	0	0	0	0	0	0	0	0	0	0	0	0	0	0	0	0
231	0	0	0	0	0	0	0	0	0	0	0	0	0	0	0	0	0	0	0	0.0672485	0.201688	0.336049	0.470334	0.604541	0.738671	0.872723	1.0067	1.1406	1.32004	1.50977	1.7098	1.92013	2.14075	2.37166	2.61286	2.86436	3.12615	3.39824	4.5858	5.83394	7.14266	8.51197	9.94185	11.4323	12.9834	14.595	16.2672	18	36.3005
232	0	0	0	0	0	0	0	0	0	0	0	0	0	0	0	0	0	0	0	0	0	0	0	0	0	0	0	0.119526	0.143658	0.169279	0.196388	0.224986	0.255072	0.286646	0.319709	0.354261	0.390301	0.42783	0.46353	0.500534	0.538842	0.578454	0.61937	0.661591	0.705116	0.749945	0.796078	0.843516	1.66691
233	0	0	0	0	0	0	0	0	0	0	0	0	0	0	0	0	0	0	0	0	0	0	0	0	0	0	0	0	0	0	0	0	0	0	0	0	0	0	0	0	0	0	0	0	0	0	0	0	0.128238
234	0	0	0	0	0	0	0	0	0	0	0	0	0	0	0	0	0	0	0	0	0	0	0	0	0	0	0	0	0	0	0	0	0	0	0	0	0	0	0	0	0	0	0	0	0	0	0	0	0
238	0	0	0	0	0	0	0	0	0	0	0	0	0	0	0	0	0	0	0	0	0	0	0	0	0	0	0	0	0	0	0	0	0	0	0	0	0	0	0	0	0	0	0	0	0	0	0	0	0
242	0	0	0	0	0	0	0	0	0	0	0	0	0	0	0	0	0	0	0	0	0	0	0	0	0	0	0	0	0	0	0	0	0	0	0	0	0	0	0	0	0	0	0	0	0	0	0	0	0.151333
246	0	0	0	0	0	0	0	0	0	0	0	0	0	0	0	0	0	0	0	0	0	0	0	0	0	0	0	0	0	0	0	0	0	0	0	0	0	0	0	0	0	0	0	0	0	0	0	0	0
250	0	0	0	0	0	0	0	0	0	0	0	0	0	0	0	0	0	0	0	0.155932	0.518731	1.00904	1.86853	3.56665	2.91203	4.52445	6.16122	7.8729	8.8033	9.78104	10.8061	11.8786	12.9983	14.1655	15.3799	16.6417	17.9509	19.3074	32.2731	45.9285	60.2736	75.3084	91.0328	107.447	124.551	142.344	160.827	180	195.771
254	0	0	0	0	0	0	0	0	0	0	0	0	0	0	0	0	0	0	0	0	0	0	0	0	0	0	0	0	0	0	0	0	0	0	0	0	0	0	0	0	0	0	0	0	0	0	0	0	0.150415
258	0	0	0	0	0	0	0	0	0	0	0	0	0	0	0	0	0	0	0	0	0	0	0	0	0	0	0	0	0	0	0	0	0	0	0	0	0	0	0	0	0	0	0	0	0	0	0	0	0
262	0	0	0	0	0	0	0	0	0	0	0	0	0	0	0	0	0	0	0	0	0	0	0	0	0	0	0	0	0	0	0	0	0	0	0	0	0	0	0	0	0	0	0	0	0	0	0	0	0.0580211
266	0	0	0	0	0	0	0	0	0	0	0	0	0	0	0	0	0	0	0	0	0	0	0	0	0	0	0	0	0	0	0	0	0	0	0	0	0	0	0	0	0	0	0	0	0	0	0	0	0.605333
268	0	0	0	0	0	0	0	0	0	0	0	0	0	0	0	0	0	0	0	0.0428676	0.131075	0.315921	0.565984	0.868739	0.803634	1.11317	1.41984	1.68689	1.9267	2.17977	2.44609	2.72567	3.0185	3.32459	3.64394	3.97655	4.32241	4.68152	6.5503	8.51546	10.577	12.735	14.9893	17.34	19.7871	22.3306	24.9705	27.7068	33.7495
270	0	0	0	0	0	0	0	0	0	0	0	0	0	0	0	0	0	0	0	0	0	0	0	0	0	0	0	0.53321	0.534022	0.533256	0.530913	0.526991	0.521491	0.514412	0.505756	0.495522	0.483709	0.470318	0.482286	0.494172	0.505976	0.517699	0.52934	0.540899	0.552376	0.563772	0.575087	0.586319	0.591531
275	0	0	0	0	0	0	0	0	0	0	0	0	0	0	0	0	0	0	0	0	0	0	0	0	0	0	0	0.0373911	0.0498012	0.0630509	0.0771401	0.0920689	0.107837	0.124445	0.141893	0.16018	0.179307	0.199273	0.253012	0.309421	0.368499	0.430246	0.494662	0.561747	0.631502	0.703926	0.779019	0.856781	2.91795
276	0	0	0	0	0	0	0	0	0	0	0	0	0	0	0	0	0	0	0	0	0.120619	0.32165	0.731754	1.15794	0.751857	1.1499	1.44743	1.50371	1.79251	2.09889	2.42286	2.76442	3.12357	3.5003	3.89463	4.30654	4.73604	5.18313	11.2781	17.7034	24.4592	31.5453	38.9618	46.7087	54.7859	63.1936	71.9316	81	90.197
288	0	0	0	0	0	0	0	0	0	0	0	0	0	0	0	0	0	0	0	0	0	0	0	0	0	0	0	0.631445	0.685207	0.741162	0.799309	0.859649	0.922181	0.986906	1.05382	1.12293	1.19424	1.26773	1.31024	1.35309	1.39629	1.43984	1.48374	1.52799	1.57259	1.61753	1.66283	1.70847	2.29821
292	0	0	0	0	0	0	0	0	0	0	0	0	0	0	0	0	0	0	0	0	0	0	0	0	0	0	0	0	0	0	0	0	0	0	0	0	0	0	0	0	0	0	0	0	0	0	0	0	0
296	0	0	0	0	0	0	0	0	0	0	0	0	0	0	0	0	0	0	0	0	0	0	0	0	0	0	0	0	0	0	0	0	0	0	0	0	0	0	0	0	0	0	0	0	0	0	0	0	0
300	0	0	0	0	0	0	0	0	0	0	0	0	0	0	0	0	0	0	0	0.0636348	0.200952	0.361714	0.548599	0.75357	0.663142	0.870792	1.50714	1.70809	1.95526	2.21618	2.49086	2.7793	3.08149	3.39745	3.72715	4.07062	4.42784	4.79882	10.0643	15.6147	21.4501	27.5703	33.9754	40.6655	47.6404	54.9003	62.4451	70.2748	109.894
304	0	0	0	0	0	0	0	0	0	0	0	0	0	0	0	0	0	0	0	0	0	0	0	0	0	0	0	0	0	0	0	0	0	0	0	0	0	0	0	0	0	0	0	0	0	0	0	0	0
308	0	0	0	0	0	0	0	0	0	0	0	0	0	0	0	0	0	0	0	0	0	0	0	0	0	0	0	0	0	0	0	0	0	0	0	0	0	0	0	0	0	0	0	0	0	0	0	0	0
312	0	0	0	0	0	0	0	0	0	0	0	0	0	0	0	0	0	0	0	0	0	0	0	0	0	0	0	0	0	0	0	0	0	0	0	0	0	0	0	0	0	0	0	0	0	0	0	0	0.0817223
316	0	0	0	0	0	0	0	0	0	0	0	0	0	0	0	0	0	0	0	0	0	0	0	0	0	0	0	0	0	0	0	0	0	0	0	0	0	0	0	0	0	0	0	0	0	0	0	0	0
320	0	0	0	0	0	0	0	0	0	0	0	0	0	0	0	0	0	0	0	0.0653781	0.253608	0.435871	0.624415	0.814737	1.00123	1.1766	0.950597	1.15215	1.22266	1.29504	1.3693	1.44544	1.52346	1.60336	1.68514	1.76879	1.85432	1.94173	3.03027	4.17621	5.37953	6.64025	7.95836	9.33386	10.7668	12.257	13.8047	15.4098	17.7983
324	0	0	0	0	0	0	0	0	0	0	0	0	0	0	0	0	0	0	0	0	0	0.276528	0.440093	0.643176	0.893474	1.20004	1.57348	2.02627	2.14905	2.27505	2.40426	2.53667	2.6723	2.81113	2.95318	3.09844	3.24691	3.39858	3.50612	3.61423	3.72292	3.8322	3.94205	4.05248	4.16349	4.27508	4.38725	4.5	6.81
328	0	0	0	0	0	0	0	0	0	0	0	0	0	0	0	0	0	0	0	0.261726	0.958406	1.71264	2.5441	3.70238	5.00224	6.40918	7.09379	8.49756	9.29947	10.1369	11.0099	11.9185	12.8625	13.8421	14.8573	15.908	16.9942	18.116	18.81	19.5138	20.2274	20.9508	21.684	22.427	23.1798	23.9424	24.7148	25.497	35.0564
332	0	0	0	0	0	0	0	0	0	0	0	0	0	0	0	0	0	0	0	0	0	0	0	0	0	0	0	0.0200598	0.045498	0.0728312	0.10206	0.133183	0.166201	0.201115	0.237923	0.276627	0.317226	0.359719	0.693606	1.04547	1.41531	1.80313	2.20893	2.63271	3.07447	3.5342	4.01191	4.5076	7.57945
334	0	0	0	0	0	0	0	0	0	0	0	0	0	0	0	0	0	0	0	0	0	0	0	0	0	0	0	0	0	0	0	0	0	0	0	0	0	0	0	0	0	0	0	0	0	0	0	0	0
336	0	0	0	0	0	0	0	0	0	0	0	0	0	0	0	0	0	0	0	0	0	0	0	0	0	0	0	0	0	0	0	0	0	0	0	0	0	0	0	0	0	0	0	0	0	0	0	0	0
340	0	0	0	0	0	0	0	0	0	0	0	0	0	0	0	0	0	0	0	0	0	0	0	0	0	0	0	0.139324	0.158521	0.178765	0.200057	0.222398	0.245786	0.270222	0.295706	0.322238	0.349819	0.378447	0.819299	1.28404	1.77268	2.2852	2.82162	3.38193	3.96613	4.57422	5.2062	5.86207	10.613
0	0	0	0	0	0	0	0	0	0	0	0	0	0	0	0	0	0	0	0	0	0	0	0	0	0	0	0	0	0	0	0	0	0	0	0	0	0	0	0	0	0	0	0	0	0	0	0	0	0
348	0	0	0	0	0	0	0	0	0	0	0	0	0	0	0	0	0	0	0	0	0	0	0	0	0	0	0	0.0989793	0.125915	0.154619	0.18509	0.217328	0.251334	0.287107	0.324648	0.363956	0.405031	0.447874	0.929268	1.43669	1.97015	2.52965	3.11517	3.72673	4.36433	5.02795	5.71761	6.4333	12.6024
352	0	0	0	0	0	0	0	0	0	0	0	0	0	0	0	0	0	0	0	0	0	0	0	0	0	0	0	0	0	0	0	0	0	0	0	0	0	0	0	0	0	0	0	0	0	0	0	0	0
356	0	0	0	0	0	0	0	0	0	0	0	0	0	0	0	0	0	0	0	8.03761	22.6766	35.5038	46.6443	56.2231	64.3631	71.1843	76.8022	96.7139	129.585	164.688	202.021	241.586	283.381	327.408	373.665	422.154	472.873	525.823	1338.81	2196.12	3097.76	4043.74	5034.05	6068.68	7147.65	8270.95	9438.58	10650.5	12641.1
360	0	0	0	0	0	0	0	0	0	0	0	0	0	0	0	0	0	0	0	0.211145	0.738271	1.51908	2.59931	4.05087	7.014	10.6075	13.8868	18.041	22.4241	27.0888	32.0351	37.2631	42.7728	48.5641	54.637	60.9916	67.6279	74.5457	141.008	211.044	284.655	361.839	442.598	526.93	614.836	706.317	801.371	900	1346.87
364	0	0	0	0	0	0	0	0	0	0	0	0	0	0	0	0	0	0	0	1.22167	3.73556	6.39602	9.16664	8.01681	10.1929	12.4643	17.4222	18.041	21.7577	24.5439	27.4744	30.5494	33.7687	37.1324	40.6406	44.2931	48.09	52.0313	69.7661	88.4036	107.944	128.387	149.732	171.98	195.131	219.185	244.141	270	938.267
368	0	0	0	0	0	0	0	0	0	0	0	0	0	0	0	0	0	0	0	3.34729	8.64751	12.2047	12.9783	11.7177	13.8108	15.7183	21.8001	12.9486	20.87	22.8512	24.9197	27.0756	29.3187	31.6491	34.0668	36.5718	39.1641	41.8437	59.5726	78.2201	97.7861	118.271	139.674	161.995	185.235	209.394	234.471	260.467	354.756
372	0	0	0	0	0	0	0	0	0	0	0	0	0	0	0	0	0	0	0	0	0	0	0	0	0	0	0	0	0	0	0	0	0	0	0	0	0	0	0	0	0	0	0	0	0	0	0	0	0
376	0	0	0	0	0	0	0	0	0	0	0	0	0	0	0	0	0	0	0	0	0	0	0	0	0	0	0	0.751254	0.91597	1.09105	1.27648	1.47227	1.67843	1.89494	2.12181	2.35904	2.60662	2.86457	3.5433	4.25519	5.00024	5.77845	6.58982	7.43435	8.31204	9.22289	10.1669	11.1441	26.3589
380	0	0	0	0	0	0	0	0	0	0	0	0	0	0	0	0	0	0	0	1.01785	3.39534	6.80021	11.968	21.745	16.4767	21.0986	34.4941	38.2853	43.7867	49.5934	55.7056	62.1232	68.8461	75.8744	83.2081	90.8472	98.7917	107.042	192.736	283.021	377.896	477.363	581.421	690.069	803.308	921.138	1043.56	1170.57	1498.78
384	0	0	0	0	0	0	0	0	0	0	0	0	0	0	0	0	0	0	0	0	0	0	0	0	0	0	0	0.0723439	0.0860305	0.100547	0.115894	0.132071	0.149079	0.166917	0.185584	0.205083	0.225411	0.246569	0.294493	0.344687	0.397153	0.451889	0.508897	0.568175	0.629725	0.693546	0.759637	0.828	1.25304
388	0	0	0	0	0	0	0	0	0	0	0	0	0	0	0	0	0	0	0	0	0	0	0	0	0	0	0	0.0768619	0.123748	0.174004	0.22763	0.284626	0.344992	0.408728	0.475835	0.546311	0.620158	0.697375	1.11213	1.54882	2.00744	2.488	2.9905	3.51493	4.06129	4.62959	5.21983	5.832	8.23253
392	0	0	0	0	0	0	0	0	0	0	0	0	0	0	0	0	0	0	0	3.26124	9.78371	16.8497	19.0686	26.8623	39.9569	59.2295	88.6819	146.028	166.381	187.85	210.435	234.136	258.954	284.888	311.938	340.105	369.387	399.786	553.238	714.58	883.812	1060.94	1245.95	1438.85	1639.65	1848.33	2064.91	2289.37	2340.86
398	0	0	0	0	0	0	0	0	0	0	0	0	0	0	0	0	0	0	0	0.0548099	0.205537	0.428203	0.749355	1.20432	1.83993	2.71808	3.92031	5.55378	7.9935	10.6038	13.3847	16.3362	19.4582	22.7509	26.2141	29.8479	33.6523	37.6272	89.3298	143.845	201.173	261.314	324.267	390.033	458.611	530.002	604.206	681.222	704.653
400	0	0	0	0	0	0	0	0	0	0	0	0	0	0	0	0	0	0	0	0	0	0	0	0	0	0	0	0.525097	0.579397	0.636259	0.695682	0.757666	0.822211	0.889318	0.958986	1.03121	1.10601	1.18336	1.7529	2.3522	2.98127	3.6401	4.32869	5.04705	5.79516	6.57304	7.38069	8.21809	11.193
404	0	0	0	0	0	0	0	0	0	0	0	0	0	0	0	0	0	0	0	0	0	0	0	0	0	0	0	0.452601	0.556691	0.667395	0.784713	0.908646	1.03919	1.17635	1.32013	1.47052	1.62752	1.79114	1.99649	2.21039	2.43287	2.66391	2.90351	3.15168	3.40842	3.67371	3.94758	4.23001	5.54789
408	0	0	0	0	0	0	0	0	0	0	0	0	0	0	0	0	0	0	0	0.279455	0.902732	1.74397	3.13189	2.89071	3.91938	4.98845	6.69293	8.64407	11.2141	13.9553	16.8675	19.9509	23.2053	26.6309	30.2275	33.9953	37.9341	42.0441	53.3432	65.2034	77.6245	90.6066	104.15	118.254	132.919	148.145	163.932	180.28	221.068
410	0	0	0	0	0	0	0	0	0	0	0	0	0	0	0	0	0	0	0	0.330205	1.06503	2.05364	3.6793	3.38563	4.57167	5.7852	7.69426	9.79064	13.2779	17.0032	20.9667	25.1682	29.6079	34.2858	39.2017	44.3558	49.748	55.3783	71.6844	88.8085	106.751	125.511	145.089	165.485	186.699	208.731	231.581	255.249	312.965
414	0	0	0	0	0	0	0	0	0	0	0	0	0	0	0	0	0	0	0	0	0	0	0	0	0	0	0	0.0718435	0.0793107	0.0871312	0.0953051	0.103832	0.112713	0.121947	0.131534	0.141475	0.151769	0.162416	0.190887	0.220682	0.2518	0.284243	0.318009	0.3531	0.389514	0.427252	0.466314	0.5067	0.426003
417	0	0	0	0	0	0	0	0	0	0	0	0	0	0	0	0	0	0	0	0.492632	1.50959	2.66124	3.91378	5.25249	6.6609	8.12035	10.3885	12.8111	16.0929	19.5878	23.2957	27.2167	31.3506	35.6976	40.2577	45.0307	50.0168	55.216	75.1469	96.0975	118.068	141.058	165.067	190.096	216.145	243.213	271.301	300.409	327.3
418	0	0	0	0	0	0	0	0	0	0	0	0	0	0	0	0	0	0	0	0	0	0	0	0	0	0	0	0.124611	0.145692	0.168011	0.191568	0.216363	0.242397	0.269669	0.298178	0.327926	0.358913	0.391137	0.589512	0.798288	1.01746	1.24704	1.48701	1.73739	1.99816	2.26934	2.55092	2.84289	3.98356
422	0	0	0	0	0	0	0	0	0	0	0	0	0	0	0	0	0	0	0	0.0974444	0.265193	0.449981	0.636698	0.820516	0.759048	0.900594	1.11921	0.975877	1.03861	1.10316	1.16954	1.23774	1.30777	1.37961	1.45328	1.52877	1.60609	1.68523	2.24536	2.83393	3.45095	4.09641	4.77031	5.47266	6.20345	6.96269	7.75036	8.56648	12.5711
426	0	0	0	0	0	0	0	0	0	0	0	0	0	0	0	0	0	0	0	0	0	0	0	0	0	0	0	0	0	0	0	0	0	0	0	0	0	0	0	0	0	0	0	0	0	0	0	0	0.0384357
428	0	0	0	0	0	0	0	0	0	0	0	0	0	0	0	0	0	0	0	0	0	0	0	0	0	0	0	0	0	0	0	0	0	0	0	0	0	0	0	0	0	0	0	0	0	0	0	0	0.0235585
430	0	0	0	0	0	0	0	0	0	0	0	0	0	0	0	0	0	0	0	0	0	0	0	0	0	0	0	0	0	0	0	0	0	0	0	0	0	0	0	0	0	0	0	0	0	0	0	0	0
434	0	0	0	0	0	0	0	0	0	0	0	0	0	0	0	0	0	0	0	0.322975	0.99865	1.1767	0.950651	1.85131	3.04615	4.54311	5.29182	6.05379	6.97245	7.94316	8.96591	10.0407	11.1675	12.3464	13.5773	14.8602	16.1952	17.5822	19.1561	20.7896	22.4825	24.235	26.047	27.9185	29.8496	31.8402	33.8903	36	42.5781
438	0	0	0	0	0	0	0	0	0	0	0	0	0	0	0	0	0	0	0	0	0	0	0	0	0	0	0	0	0	0	0	0	0	0	0	0	0	0	0	0	0	0	0	0	0	0	0	0	0
440	0	0	0	0	0	0	0	0	0	0	0	0	0	0	0	0	0	0	0	0	0	0	0	0	0	0	0	0	0	0	0	0	0	0	0	0	0	0	0	0	0	0	0	0	0	0	0	0	0.115444
442	0	0	0	0	0	0	0	0	0	0	0	0	0	0	0	0	0	0	0	0	0	0	0	0	0	0	0	0	0	0	0	0	0	0	0	0	0	0	0	0	0	0	0	0	0	0	0	0	0
446	0	0	0	0	0	0	0	0	0	0	0	0	0	0	0	0	0	0	0	0	0	0	0	0	0	0	0	0	0	0	0	0	0	0	0	0	0	0	0	0	0	0	0	0	0	0	0	0	0
450	0	0	0	0	0	0	0	0	0	0	0	0	0	0	0	0	0	0	0	0	0	0	0	0	0	0.686772	0.960448	1.2782	1.54746	1.8335	2.13632	2.45592	2.79229	3.14545	3.51538	3.9021	4.30559	4.72586	5.09109	5.4691	5.8599	6.26349	6.67987	7.10904	7.551	8.00574	8.47328	8.9536	52.6936
454	0	0	0	0	0	0	0	0	0	0	0	0	0	0	0	0	0	0	0	0	0	0	0	0	0	0	0	0	0	0	0	0	0	0	0	0	0	0	0	0	0	0	0	0	0	0	0	0	0.145279
458	0	0	0	0	0	0	0	0	0	0	0	0	0	0	0	0	0	0	0	0	0	0.283827	0.462473	0.678326	0.931386	1.22165	1.76199	2.3963	2.88844	3.41107	3.96418	4.54778	5.16186	5.80642	6.48147	7.187	7.92302	8.68952	15.244	22.1488	29.404	37.0096	44.9654	53.2717	61.9282	70.9351	80.2924	90	110.171
462	0	0	0	0	0	0	0	0	0	0	0	0	0	0	0	0	0	0	0	0	0	0	0	0	0	0	0	0	0	0	0	0	0	0	0	0	0	0	0	0	0	0	0	0	0	0	0	0	0
466	0	0	0	0	0	0	0	0	0	0	0	0	0	0	0	0	0	0	0	0	0	0	0	0.380553	0.513628	0.653287	0.873822	1.12446	1.34608	1.58129	1.83008	2.09247	2.36844	2.65801	2.96116	3.27789	3.60822	3.95213	4.19855	4.45237	4.71362	4.98228	5.25836	5.54185	5.83276	6.13109	6.43683	6.74999	12.485
470	0	0	0	0	0	0	0	0	0	0	0	0	0	0	0	0	0	0	0	0	0	0	0	0	0	0	0	0.00480273	0.00549698	0.00622985	0.00700135	0.00781148	0.00866023	0.0095476	0.0104736	0.0114382	0.0124415	0.0134834	0.0258174	0.0388153	0.0524769	0.0668024	0.0817917	0.0974449	0.113762	0.130743	0.148387	0.166696	0.280296
474	0	0	0	0	0	0	0	0	0	0	0	0	0	0	0	0	0	0	0	0	0	0	0	0	0	0	0	0.0116824	0.0188074	0.0264444	0.0345936	0.043255	0.0524284	0.062114	0.0723117	0.0830215	0.0942435	0.105978	0.159848	0.216542	0.276061	0.338405	0.403573	0.471566	0.542383	0.616025	0.692492	0.771783	0.778643
478	0	0	0	0	0	0	0	0	0	0	0	0	0	0	0	0	0	0	0	0	0	0	0	0.526543	0.69707	0.879168	1.17471	1.50999	1.80025	2.1082	2.43383	2.77714	3.13813	3.5168	3.91316	4.3272	4.75892	5.20832	5.54141	5.88475	6.23832	6.60213	6.97618	7.36047	7.75499	8.15976	8.57476	9	9.10246
480	0	0	0	0	0	0	0	0	0	0	0	0	0	0	0	0	0	0	0	0	0	0	0	0	0	0	0	0.00161149	0	0	0	0	0	0	0	0	0	0.0388628	0	0	0	0	0	0	0	0	0	0.235526	0
484	0	0	0	0	0	0	0	0	0	0	0	0	0	0	0	0	0	0	0	3.32543	11.5239	22.2107	35.4611	51.4185	70.232	92.0567	4.33532	20.0538	25.0383	30.3445	35.9724	41.922	48.1934	54.7864	61.7012	68.9377	76.4959	84.3758	134.196	186.65	241.737	299.459	359.814	422.804	488.427	556.684	627.574	701.099	943.108
492	0	0	0	0	0	0	0	0	0	0	0	0	0	0	0	0	0	0	0	0	0	0	0	0	0	0	0	0	0	0	0	0	0	0	0	0	0	0	0	0	0	0	0	0	0	0	0	0	0
496	0	0	0	0	0	0	0	0	0	0	0	0	0	0	0	0	0	0	0	0	0	0	0	0	0	0	0	0.0595059	0.0756498	0.0928525	0.111114	0.130434	0.150813	0.172251	0.194747	0.218302	0.242916	0.268589	0.409804	0.558437	0.71449	0.877962	1.04885	1.22716	1.41289	1.60604	1.80661	2.01459	2.25833
498	0	0	0	0	0	0	0	0	0	0	0	0	0	0	0	0	0	0	0	0	0	0	0	0	0	0	0	0.337871	0.436889	0.542485	0.654658	0.773409	0.898736	1.03064	1.16912	1.31418	1.46582	1.62403	3.36821	5.20672	7.13954	9.16668	11.2881	13.5039	15.814	18.2185	20.7172	23.3103	33.9264
500	0	0	0	0	0	0	0	0	0	0	0	0	0	0	0	0	0	0	0	0	0	0	0	0	0	0	0	0	0	0	0	0	0	0	0	0	0	0	0	0	0	0	0	0	0	0	0	0	0
504	0	0	0	0	0	0	0	0	0	0	0	0	0	0	0	0	0	0	0	0.346739	1.08728	1.66251	2.12673	2.941	3.09599	2.92794	4.8579	4.09733	5.12889	6.22721	7.39226	8.62406	9.9226	11.2879	12.7199	14.2187	15.7842	17.4165	21.3912	25.559	29.92	34.4742	39.2216	44.1621	49.2958	54.6227	60.1427	65.8559	184.559
508	0	0	0	0	0	0	0	0	0	0	0	0	0	0	0	0	0	0	0	0	0.15025	0.365499	0.671201	1.06594	1.54826	2.11671	3.03701	4.10844	4.83924	5.61361	6.43155	7.29307	8.19816	9.14683	10.1391	11.1749	12.2543	13.3772	14.8315	16.3453	17.9187	19.5516	21.2441	22.9962	24.8078	26.679	28.6097	30.6	9.13639
512	0	0	0	0	0	0	0	0	0	0	0	0	0	0	0	0	0	0	0	0	0	0	0	0	0	0	0	0	0	0	0	0	0	0	0	0	0	0	1.44	2.96	4.56	6.24	8	9.84	11.76	13.76	15.84	18	18.16
516	0	0	0	0	0	0	0	0	0	0	0	0	0	0	0	0	0	0	0	0	0	0	0	0	0	0	0	0.0446143	0.0626243	0.0818824	0.102389	0.124143	0.147146	0.171396	0.196895	0.223642	0.251637	0.28088	0.332014	0.385544	0.441469	0.499788	0.560503	0.623612	0.689117	0.757016	0.827311	0.9	1.362
520	0	0	0	0	0	0	0	0	0	0	0	0	0	0	0	0	0	0	0	0	0	0	0	0	0	0	0	0	0	0	0	0	0	0	0	0	0	0	0	0	0	0	0	0	0	0	0	0	0
524	0	0	0	0	0	0	0	0	0	0	0	0	0	0	0	0	0	0	0	0	0	0	0	0	0	0	0	0.346163	0.455036	0.571219	0.694711	0.825513	0.963625	1.10905	1.26178	1.42182	1.58917	1.76383	2.6912	3.6673	4.69211	5.76565	6.8879	8.05888	9.27858	10.547	11.8641	13.23	21.7163
528	0	0	0	0	0	0	0	0	0	0	0	0	0	0	0	0	0	0	0	0	0	0	0	0	0.137179	0.245131	0.378626	0.537662	0.575411	0.61441	0.654658	0.696155	0.738903	0.782899	0.828145	0.87464	0.922385	0.971379	1.9439	2.9689	4.04639	5.17637	6.35884	7.59379	8.88123	10.2212	11.6136	13.0585	21.9576
530	0	0	0	0	0	0	0	0	0	0	0	0	0	0	0	0	0	0	0	0	0	0	0	0	0	0	0	0	0	0	0	0	0	0	0	0	0	0	0	0	0	0	0	0	0	0	0	0	0
533	0	0	0	0	0	0	0	0	0	0	0	0	0	0	0	0	0	0	0	0	0	0	0	0	0	0	0	0	0	0	0	0	0	0	0	0	0	0	0	0	0	0	0	0	0	0	0	0	0
540	0	0	0	0	0	0	0	0	0	0	0	0	0	0	0	0	0	0	0	0	0	0	0	0	0	0	0	0	0	0	0	0	0	0	0	0	0	0	0	0	0	0	0	0	0	0	0	0	0.302667
548	0	0	0	0	0	0	0	0	0	0	0	0	0	0	0	0	0	0	0	0	0	0	0	0	0	0	0	0	0	0	0	0	0	0	0	0	0	0	0	0	0	0	0	0	0	0	0	0	0
554	0	0	0	0	0	0	0	0	0	0	0	0	0	0	0	0	0	0	0	0	0	0	0	0	0	0	0	0	0	0	0	0	0	0	0	0	0	0	2.30994	4.74821	7.31481	10.0097	12.833	15.7846	18.8645	22.0728	25.4093	28.8742	33.8537
558	0	0	0	0	0	0	0	0	0	0	0	0	0	0	0	0	0	0	0	0	0	0	0	0	0	0	0	0.0338349	0.0413226	0.0492821	0.0577136	0.0666168	0.075992	0.085839	0.0961579	0.106949	0.118211	0.129946	0.240271	0.356519	0.478689	0.606783	0.7408	0.880739	1.0266	1.17839	1.3361	1.49973	3.53047
562	0	0	0	0	0	0	0	0	0	0	0	0	0	0	0	0	0	0	0	0	0	0	0	0	0	0	0	0.26932	0.320999	0.375824	0.433796	0.494915	0.55918	0.626592	0.69715	0.770856	0.847707	0.927706	0.987058	1.04823	1.11124	1.17606	1.24271	1.31119	1.38149	1.45362	1.52757	1.60334	3.50479
566	0	0	0	0	0	0	0	0	0	0	0	0	0	0	0	0	0	0	0	0	0	0	0	0	0	0	0	0.452935	0.517658	0.585966	0.657859	0.733337	0.8124	0.895048	0.981281	1.0711	1.1645	1.26149	1.32904	1.39835	1.4694	1.54221	1.61677	1.69307	1.77113	1.85094	1.9325	2.01581	24.2917
570	0	0	0	0	0	0	0	0	0	0	0	0	0	0	0	0	0	0	0	0	0	0	0	0	0	0	0	0	0	0	0	0	0	0	0	0	0	0	0	0	0	0	0	0	0	0	0	0	0
574	0	0	0	0	0	0	0	0	0	0	0	0	0	0	0	0	0	0	0	0	0	0	0	0	0	0	0	0	0	0	0	0	0	0	0	0	0	0	0	0	0	0	0	0	0	0	0	0	0
578	0	0	0	0	0	0	0	0	0	0	0	0	0	0	0	0	0	0	0	0	0	0	0	0	0	0	0	0	0	0	0	0	0	0	0	0	0	0	0	0	0	0	0	0	0	0	0	0	1.11416
580	0	0	0	0	0	0	0	0	0	0	0	0	0	0	0	0	0	0	0	0	0	0	0	0	0	0	0	0	0	0	0	0	0	0	0	0	0	0	0	0	0	0	0	0	0	0	0	0	0
583	0	0	0	0	0	0	0	0	0	0	0	0	0	0	0	0	0	0	0	0	0	0	0	0	0	0	0	0	0	0	0	0	0	0	0	0	0	0	0	0	0	0	0	0	0	0	0	0	0
584	0	0	0	0	0	0	0	0	0	0	0	0	0	0	0	0	0	0	0	0	0	0	0	0	0	0	0	0	0	0	0	0	0	0	0	0	0	0	0	0	0	0	0	0	0	0	0	0	0
585	0	0	0	0	0	0	0	0	0	0	0	0	0	0	0	0	0	0	0	0	0	0	0	0	0	0	0	0	0	0	0	0	0	0	0	0	0	0	0	0	0	0	0	0	0	0	0	0	0.454
586	0	0	0	0	0	0	0	0	0	0	0	0	0	0	0	0	0	0	0	13.8029	41.7065	65.6537	86.6927	101.329	127.509	145.738	198.733	252.007	296.579	343.805	393.684	446.217	501.402	559.241	619.734	682.879	748.678	817.13	1035.43	1264.56	1504.53	1755.32	2016.95	2289.4	2572.69	2866.81	3171.76	3487.54	4233.49
591	0	0	0	0	0	0	0	0	0	0	0	0	0	0	0	0	0	0	0	0	0	0	0	0	0	0	0	0.132283	0.155661	0.18043	0.20659	0.234142	0.263085	0.29342	0.325146	0.358263	0.392771	0.42867	0.805737	1.20307	1.62067	2.05854	2.51668	2.99509	3.49376	4.0127	4.55191	5.11139	6.00362
598	0	0	0	0	0	0	0	0	0	0	0	0	0	0	0	0	0	0	0	0	0	0	0	0	0	0	0	0	0	0	0	0	0	0	0	0	0	0	0	0	0	0	0	0	0	0	0	0	0
600	0	0	0	0	0	0	0	0	0	0	0	0	0	0	0	0	0	0	0	0	0	0	0	0	0	0	0	0	0	0	0	0	0	0	0	0	0	0	0	0	0	0	0	0	0	0	0	0	4.54
604	0	0	0	0	0	0	0	0	0	0	0	0	0	0	0	0	0	0	0	1.57791	5.09069	8.72826	12.4663	16.2035	19.8104	23.1139	8.00554	9.43262	9.7652	10.0943	10.42	10.7423	11.0611	11.3765	11.6884	11.9969	12.3019	12.6036	19.7314	27.2351	35.1149	43.3706	52.0024	61.0101	70.3938	80.1535	90.2891	100.801	218.452
608	0	0	0	0	0	0	0	0	0	0	0	0	0	0	0	0	0	0	0	0	0	0	0	0	0	0.738972	1.36413	2.41546	3.52708	4.71678	5.98455	7.3304	8.75433	10.2563	11.8364	13.4946	15.2308	17.0451	43.0442	70.4605	99.2943	129.545	161.214	194.299	228.802	264.723	302.061	340.816	390.958
612	0	0	0	0	0	0	0	0	0	0	0	0	0	0	0	0	0	0	0	0	0	0	0	0	0	0	0	0	0	0	0	0	0	0	0	0	0	0	0	0	0	0	0	0	0	0	0	0	0
616	0	0	0	0	0	0	0	0	0	0	0	0	0	0	0	0	0	0	0	0	0	0	0	0	0	0	0	0.0828375	0.0963863	0.110722	0.125846	0.141757	0.158455	0.175941	0.194213	0.213274	0.233121	0.253756	0.574028	0.91169	1.26674	1.63918	2.02902	2.43624	2.86085	3.30285	3.76225	4.23903	17.8196
620	0	0	0	0	0	0	0	0	0	0	0	0	0	0	0	0	0	0	0	0.105168	0.36699	0.738728	1.19439	2.04242	1.71001	2.78563	4.77484	5.08925	5.88905	6.73471	7.62624	8.56362	9.54688	10.576	11.651	12.7718	13.9385	15.1511	28.4256	42.4135	57.1148	72.5296	88.6578	105.499	123.054	141.323	160.305	180	212.135
624	0	0	0	0	0	0	0	0	0	0	0	0	0	0	0	0	0	0	0	0	0	0	0	0	0	0	0	0.667282	0.72399	0.783007	0.844333	0.907968	0.973912	1.04216	1.11273	1.1856	1.26078	1.33827	1.38285	1.42779	1.47308	1.51873	1.56472	1.61107	1.65778	1.70483	1.75224	1.8	4.086
626	0	0	0	0	0	0	0	0	0	0	0	0	0	0	0	0	0	0	0	0	0	0	0	0	0	0	0	0	0	0	0	0	0	0	0	0	0	0	0	0	0	0	0	0	0	0	0	0	0
630	0	0	0	0	0	0	0	0	0	0	0	0	0	0	0	0	0	0	0	0	0	0	0	0	0	0	0	0.00516128	0.0146498	0.0248524	0.0357689	0.0473995	0.0597441	0.0728027	0.0865752	0.101062	0.116262	0.132177	0.392533	0.667144	0.95601	1.25913	1.5765	1.90813	2.25401	2.61415	2.98854	3.37719	4.12995
634	0	0	0	0	0	0	0	0	0	0	0	0	0	0	0	0	0	0	0	0	0	0	0	0	0	0	0	0	0	0	0	0	0	0	0	0	0	0	0	0	0	0	0	0	0	0	0	0	0.0739644
638	0	0	0	0	0	0	0	0	0	0	0	0	0	0	0	0	0	0	0	0	0	0	0	0	0	0	0	0	0	0	0	0	0	0	0	0	0	0	0	0	0	0	0	0	0	0	0	0	0
642	0	0	0	0	0	0	0	0	0	0	0	0	0	0	0	0	0	0	0	0	0	0	0	0	0	0	0	0.016953	0.0212916	0.0259117	0.0308134	0.0359966	0.0414614	0.0472078	0.0532358	0.0595453	0.0661364	0.0730091	0.141634	0.213955	0.289973	0.369687	0.453098	0.540206	0.63101	0.725511	0.823708	0.925602	3.98434
643	0	0	0	0	0	0	0	0	0	0	0	0	0	0	0	0	0	0	0	0	0	0.0861138	0.180839	0.240626	0.294099	0.447792	0.645853	0.829563	1.08025	1.34768	1.63183	1.93272	2.25034	2.58469	2.93577	3.30358	3.68813	4.0894	6.29105	8.60852	11.0418	13.5909	16.2559	19.0366	21.9332	24.9456	28.0738	31.3179	158.931
646	0	0	0	0	0	0	0	0	0	0	0	0	0	0	0	0	0	0	0	0	0	0	0	0	0	0	0	0	0	0	0	0	0	0	0	0	0	0	0	0	0	0	0	0	0	0	0	0	0.605333
654	0	0	0	0	0	0	0	0	0	0	0	0	0	0	0	0	0	0	0	0	0	0	0	0	0	0	0	0	0	0	0	0	0	0	0	0	0	0	0	0	0	0	0	0	0	0	0	0	0
659	0	0	0	0	0	0	0	0	0	0	0	0	0	0	0	0	0	0	0	0	0	0	0	0	0	0	0	0.0006173	0.000773578	0.000939978	0.0011165	0.00130314	0.00149991	0.0017068	0.00192381	0.00215094	0.00238819	0.00263557	0.00373578	0.00489294	0.00610703	0.00737807	0.00870604	0.010091	0.0115328	0.0130316	0.0145873	0.0162	0.01362
660	0	0	0	0	0	0	0	0	0	0	0	0	0	0	0	0	0	0	0	0	0	0	0	0	0	0	0	0	0	0	0	0	0	0	0	0	0	0	0	0	0	0	0	0	0	0	0	0	0
662	0	0	0	0	0	0	0	0	0	0	0	0	0	0	0	0	0	0	0	0	0	0	0	0	0	0	0	0	0	0	0	0	0	0	0	0	0	0	0	0	0	0	0	0	0	0	0	0	0.151333
666	0	0	0	0	0	0	0	0	0	0	0	0	0	0	0	0	0	0	0	0	0	0	0	0	0	0	0	0	0	0	0	0	0	0	0	0	0	0	0	0	0	0	0	0	0	0	0	0	0
670	0	0	0	0	0	0	0	0	0	0	0	0	0	0	0	0	0	0	0	0	0	0	0	0	0	0	0	0	0	0	0	0	0	0	0	0	0	0	0	0	0	0	0	0	0	0	0	0	0
674	0	0	0	0	0	0	0	0	0	0	0	0	0	0	0	0	0	0	0	0	0	0	0	0	0	0	0	0	0	0	0	0	0	0	0	0	0	0	0	0	0	0	0	0	0	0	0	0	0
678	0	0	0	0	0	0	0	0	0	0	0	0	0	0	0	0	0	0	0	0	0	0	0	0	0	0	0	0.10706	0.135292	0.165367	0.197284	0.231044	0.266646	0.30409	0.343376	0.384505	0.427476	0.47229	0.581205	0.695422	0.81494	0.939759	1.06988	1.2053	1.34602	1.49205	1.64337	1.8	3.02667
682	0	0	0	0	0	0	0	0	0	0	0	0	0	0	0	0	0	0	0	0	0	0	0	0	0	0	0	0.153028	0.226151	0.304428	0.387858	0.476443	0.570182	0.669074	0.773121	0.882322	0.996676	1.11618	2.11327	3.16397	4.2683	5.42625	6.63782	7.90301	9.22183	10.5943	12.0203	13.5	63.2573
686	0	0	0	0	0	0	0	0	0	0	0	0	0	0	0	0	0	0	0	0.136289	0.512401	1.07023	1.87766	3.02528	4.63351	6.86196	9.92144	14.0897	14.9533	15.84	16.7497	17.6826	18.6385	19.6174	20.6195	21.6446	22.6928	23.7641	24.5188	25.2776	26.0407	26.808	27.5795	28.3552	29.1351	29.9192	30.7075	31.5	37.0767
690	0	0	0	0	0	0	0	0	0	0	0	0	0	0	0	0	0	0	0	0	0	0	0	0	0	0	0	0	0	0	0	0	0	0	0	0	0	0	0	0	0	0	0	0	0	0	0	0	0
694	0	0	0	0	0	0	0	0	0	0	0	0	0	0	0	0	0	0	0	0	0	0	0	0	0	0	0	0.0572906	0.0662742	0.0757725	0.0857857	0.0963136	0.107356	0.118914	0.130986	0.143573	0.156675	0.170291	0.182164	0.194426	0.207078	0.220119	0.233549	0.247368	0.261577	0.276175	0.291163	0.30654	0.309264
702	0	0	0	0	0	0	0	0	0	0	0	0	0	0	0	0	0	0	0	0	0	0	0	0	0	0	0	0	0	0	0	0	0	0	0	0	0	0	0	0	0	0	0	0	0	0	0	0	0
703	0	0	0	0	0	0	0	0	0	0	0	0	0	0	0	0	0	0	0	0	0	0	0	0	0	0	0	0.00265246	0.00305161	0.0034733	0.00391754	0.00438432	0.00487364	0.0053855	0.00591991	0.00647686	0.00705635	0.00765838	0.0135061	0.0196666	0.0261397	0.0329256	0.0400242	0.0474355	0.0551596	0.0631963	0.0715458	0.080208	0.0674341
704	0	0	0	0	0	0	0	0	0	0	0	0	0	0	0	0	0	0	0	0	0.169087	0.366189	0.630725	0.962656	1.36196	1.82862	2.63686	3.58547	5.06526	6.64784	8.33322	10.1214	12.0124	14.0062	16.1027	18.3021	20.6043	23.0092	42.9	63.8592	85.887	108.983	133.148	158.381	184.683	212.054	240.493	270	378.333
705	0	0	0	0	0	0	0	0	0	0	0	0	0	0	0	0	0	0	0	0	0	0	0	0	0	0	0	0.0103771	0.0119621	0.0136371	0.0154021	0.017257	0.019202	0.0212369	0.0233619	0.0255768	0.0278817	0.0302767	0.0608033	0.0929779	0.1268	0.162271	0.199389	0.238155	0.278569	0.32063	0.36434	0.409698	0.344449
706	0	0	0	0	0	0	0	0	0	0	0	0	0	0	0	0	0	0	0	0	0	0	0	0	0	0	0	0.26176	0.413789	0.576707	0.750513	0.935209	1.13079	1.33727	1.55463	1.78288	2.02202	2.27206	3.15627	4.08601	5.06126	6.08203	7.14832	8.26012	9.41744	10.6203	11.8686	13.1625	15.4928
710	0	0	0	0	0	0	0	0	0	0	0	0	0	0	0	0	0	0	0	0	0	0	0	0	0	0	0.79352	2.56949	3.19493	3.86058	4.56642	5.31248	6.09873	6.92519	7.79186	8.69873	9.6458	10.6331	38.9312	68.7846	100.193	133.157	167.676	203.75	241.38	280.565	321.305	363.6	427.971
716	0	0	0	0	0	0	0	0	0	0	0	0	0	0	0	0	0	0	0	0	0	0	0	0	0	0	0	0.279441	0.336591	0.397277	0.4615	0.529259	0.600554	0.675386	0.753754	0.835658	0.921098	1.01008	1.20144	1.40184	1.61126	1.82971	2.05719	2.29369	2.53923	2.79379	3.05738	3.33	5.17638
724	0	0	0	0	0	0	0	0	0	0	0	0	0	0	0	0	0	0	0	0.683996	2.3426	4.83929	9.36246	8.93907	13.0646	20.4106	22.3834	28.8722	33.0223	37.4028	42.0137	46.8551	51.9268	57.2289	62.7615	68.5244	74.5178	80.7415	141.51	205.526	272.791	343.303	417.063	494.071	574.327	657.83	744.582	834.581	975.316
732	0	0	0	0	0	0	0	0	0	0	0	0	0	0	0	0	0	0	0	0	0	0	0	0	0	0	0	0	0	0	0	0	0	0	0	0	0	0	0	0	0	0	0	0	0	0	0	0	0
736	0	0	0	0	0	0	0	0	0	0	0	0	0	0	0	0	0	0	0	0.513236	1.65387	2.85549	4.13695	5.77646	7.6219	9.67467	12.0294	14.6196	18.1371	21.8803	25.849	30.0433	34.4632	39.1088	43.9799	49.0766	54.3989	59.9468	69.8936	80.2979	91.1596	102.479	114.255	126.489	139.181	152.33	165.936	180	247.511
740	0	0	0	0	0	0	0	0	0	0	0	0	0	0	0	0	0	0	0	0	0	0	0	0	0	0	0	0.0340816	0.0398969	0.0460546	0.0525548	0.0593974	0.0665825	0.0741101	0.0819801	0.0901926	0.0987475	0.107645	0.114048	0.120637	0.12741	0.134368	0.141511	0.148839	0.156352	0.16405	0.171933	0.18	0.151333
744	0	0	0	0	0	0	0	0	0	0	0	0	0	0	0	0	0	0	0	0	0	0	0	0	0	0	0	0	0	0	0	0	0	0	0	0	0	0	0	0	0	0	0	0	0	0	0	0	0
748	0	0	0	0	0	0	0	0	0	0	0	0	0	0	0	0	0	0	0	0	0	0	0	0	0	0	0	0	0	0	0	0	0	0	0	0	0	0	0	0	0	0	0	0	0	0	0	0	4.90323
752	0	0	0	0	0	0	0	0	0	0	0	0	0	0	0	0	0	0	0	0	0	0	0	0	0	0	0	0	0	0	0	0	0	0	0	0	0	0	0	0	0	0	0	0	0	0	0	0	0.837484
756	0	0	0	0	0	0	0	0	0	0	0	0	0	0	0	0	0	0	0	0	0	0	0	0	0	0	0	0.455293	0.5134	0.574576	0.638821	0.706135	0.776518	0.84997	0.926491	1.00608	1.08874	1.17447	2.27561	3.43607	4.65584	5.93492	7.27331	8.671	10.128	11.6443	13.22	14.8549	14.987
760	0	0	0	0	0	0	0	0	0	0	0	0	0	0	0	0	0	0	0	0.584075	0.854339	1.51397	2.24723	3.0555	3.00728	3.83437	5.19934	5.96636	6.51281	7.08294	7.67674	8.29421	8.93537	9.6002	10.2887	11.0009	11.7367	12.4963	15.9783	19.634	23.4632	27.4661	31.6425	35.9926	40.5163	45.2136	50.0846	55.1291	125.927
762	0	0	0	0	0	0	0	0	0	0	0	0	0	0	0	0	0	0	0	0.189404	0.57884	0.978233	1.43937	1.92525	2.42305	2.91682	3.59119	4.23689	5.53888	6.92798	8.40419	9.96752	11.618	13.3555	15.1802	17.092	19.0909	21.1769	29.1341	37.4997	46.2738	55.4563	65.0473	75.0467	85.4546	96.2709	107.496	119.129	147.748
764	0	0	0	0	0	0	0	0	0	0	0	0	0	0	0	0	0	0	0	0	0	0	0	0	0	0	0	0.427171	0.565694	0.713557	0.870762	1.03731	1.2132	1.39842	1.59299	1.7969	2.01016	2.23275	4.90649	7.72522	10.689	13.7977	17.0514	20.4501	23.9939	27.6826	31.5163	35.495	223.338
768	0	0	0	0	0	0	0	0	0	0	0	0	0	0	0	0	0	0	0	0	0	0	0	0	0	0	0	0.220827	0.248318	0.277244	0.307605	0.339401	0.372633	0.4073	0.443402	0.48094	0.519912	0.56032	0.580616	0.60115	0.621923	0.642934	0.664183	0.68567	0.707395	0.729359	0.75156	0.774	0.78088
772	0	0	0	0	0	0	0	0	0	0	0	0	0	0	0	0	0	0	0	0	0	0	0	0	0	0	0	0	0	0	0	0	0	0	0	0	0	0	0	0	0	0	0	0	0	0	0	0	0
776	0	0	0	0	0	0	0	0	0	0	0	0	0	0	0	0	0	0	0	0	0	0	0	0	0	0	0	0	0	0	0	0	0	0	0	0	0	0	0	0	0	0	0	0	0	0	0	0	0
780	0	0	0	0	0	0	0	0	0	0	0	0	0	0	0	0	0	0	0	0	0	0	0	0	0	0	0	0	0	0	0	0	0	0	0	0	0	0	0	0	0	0	0	0	0	0	0	0	0.257267
784	0	0	0	0	0	0	0	0	0	0	0	0	0	0	0	0	0	0	0	0	0	0	0	0	0	0	0	0.749073	0.786076	0.82362	0.861706	0.900334	0.939503	0.979213	1.01947	1.06026	1.10159	1.14347	1.43112	1.73293	2.04891	2.37905	2.72336	3.08183	3.45447	3.84127	4.24224	4.65738	8.21935
788	0	0	0	0	0	0	0	0	0	0	0	0	0	0	0	0	0	0	0	0.623559	1.90164	2.984	4.3578	5.55187	5.37862	6.2976	8.99805	8.08114	9.29711	10.5817	11.935	13.357	14.8477	16.407	18.035	19.7316	21.497	23.331	28.1979	33.2981	38.6317	44.1986	49.9989	56.0325	62.2995	68.7998	75.5335	82.5005	82.8298
792	0	0	0	0	0	0	0	0	0	0	0	0	0	0	0	0	0	0	0	2.3143	7.47081	8.93456	14.4475	20.9024	20.0312	24.7097	35.1012	40.1996	45.0485	50.1466	55.494	61.0908	66.9368	73.0321	79.3767	85.9707	92.8139	99.9064	120.924	142.95	165.986	190.03	215.084	241.147	268.218	296.299	325.389	355.488	428.695
795	0	0	0	0	0	0	0	0	0	0	0	0	0	0	0	0	0	0	0	0.551913	1.69353	2.99938	4.44204	6.01738	7.79196	9.96403	13.3012	16.5469	20.0052	23.6786	27.5671	31.6708	35.9895	40.5234	45.2723	50.2364	55.4156	60.8099	78.5917	97.2649	116.829	137.285	158.633	180.871	204.001	228.022	252.935	278.739	369.08
796	0	0	0	0	0	0	0	0	0	0	0	0	0	0	0	0	0	0	0	0	0	0	0	0	0	0	0	0	0	0	0	0	0	0	0	0	0	0	0	0	0	0	0	0	0	0	0	0	0
798	0	0	0	0	0	0	0	0	0	0	0	0	0	0	0	0	0	0	0	0	0	0	0	0	0	0	0	0	0	0	0	0	0	0	0	0	0	0	0	0	0	0	0	0	0	0	0	0	0
800	0	0	0	0	0	0	0	0	0	0	0	0	0	0	0	0	0	0	0	0	0	0	0	0	0	0	0	0	0	0	0	0	0	0	0	0	0	0	0	0	0	0	0	0	0	0	0	0	0.195162
804	0	0	0	0	0	0	0	0	0	0	0	0	0	0	0	0	0	0	0	0	0	0	0	0	0	0	0	0.00290499	0.00348155	0.00409353	0.00474092	0.00542372	0.00614193	0.00689555	0.00768459	0.00850904	0.0093689	0.0102642	0.0253956	0.0413513	0.0581314	0.0757358	0.0941645	0.113418	0.133495	0.154397	0.176123	0.198673	53.7119
807	0	0	0	0	0	0	0	0	0	0	0	0	0	0	0	0	0	0	0	0	0	0	0	0	0	0	0	0	0	0	0	0	0	0	0	0	0	0	0	0	0	0	0	0	0	0	0	0	0
818	0	0	0	0	0	0	0	0	0	0	0	0	0	0	0	0	0	0	0	45.2941	141.176	244.118	354.118	471.176	595.294	726.471	902.302	1095.22	1146.58	1198.52	1251.04	1304.14	1357.83	1412.09	1466.94	1522.36	1578.37	1634.96	1692.13	1749.87	1808.21	1867.12	1926.61	1986.68	2047.34	2108.57	2170.39	2232.78	2265.82
826	0	0	0	0	0	0	0	0	0	0	0	0	0	0	0	0	0	0	0	0	0	0	0	0	0	0	0	0	0	0	0	0	0	0	0	0	0	0	0	0	0	0	0	0	0	0	0	0	9.14591
834	0	0	0	0	0	0	0	0	0	0	0	0	0	0	0	0	0	0	0	0	0	0	0	0	0	0	0	0	0	0	0	0	0	0	0	0	0	0	0	0	0	0	0	0	0	0	0	0	3.02667
840	0	0	0	0	0	0	0	0	0	0	0	0	0	0	0	0	0	0	0	0.137566	0.460054	0.831638	1.29666	1.81675	2.48295	3.22579	1.75985	2.5285	3.23433	3.98668	4.78554	5.63092	6.52281	7.46122	8.44614	9.47758	10.5555	11.68	237.752	476.365	727.518	991.213	1267.45	1556.23	1857.54	2171.4	2497.8	2836.74	4705.94
850	0	0	0	0	0	0	0	0	0	0	0	0	0	0	0	0	0	0	0	0	0	0	0	0	0	0	0	0	0	0	0	0	0	0	0	0	0	0	0	0	0	0	0	0	0	0	0	0	0
854	0	0	0	0	0	0	0	0	0	0	0	0	0	0	0	0	0	0	0	0	0	0	0	0	0	0	0	0.128881	0.144859	0.16167	0.179313	0.197789	0.217097	0.237238	0.258211	0.280017	0.302656	0.326127	0.3379	0.34981	0.361856	0.374039	0.386358	0.398814	0.411406	0.424134	0.436999	0.45	0.681
858	0	0	0	0	0	0	0	0	0	0	0	0	0	0	0	0	0	0	0	0	0	0	0	0	0	0	0	0	0	0	0	0	0	0	0	0	0	0	0	0	0	0	0	0	0	0	0	0	2.32542
860	0	0	0	0	0	0	0	0	0	0	0	0	0	0	0	0	0	0	0	1.56474	4.89899	8.82652	13.2884	18.2889	23.8324	30.1625	39.8892	51.0039	61.6352	72.9273	84.8802	97.494	110.769	124.704	139.301	154.558	170.476	187.055	241.775	299.238	359.444	422.393	488.085	556.521	627.699	701.621	778.285	857.693	990.692
862	0	0	0	0	0	0	0	0	0	0	0	0	0	0	0	0	0	0	0	0	0	0	0	0	0	0	0	0.0697206	0.0730835	0.0764905	0.0799417	0.083437	0.0869765	0.0905602	0.094188	0.0978599	0.101576	0.105336	0.123413	0.142327	0.162078	0.182667	0.204092	0.226354	0.249453	0.27339	0.298163	0.323774	27.4932
876	0	0	0	0	0	0	0	0	0	0	0	0	0	0	0	0	0	0	0	0	0	0	0	0	0	0	0	0	0	0	0	0	0	0	0	0	0	0	0	0	0	0	0	0	0	0	0	0	0
882	0	0	0	0	0	0	0	0	0	0	0	0	0	0	0	0	0	0	0	0	0	0	0	0	0	0	0	0	0	0	0	0	0	0	0	0	0	0	0	0	0	0	0	0	0	0	0	0	0
887	0	0	0	0	0	0	0	0	0	0	0	0	0	0	0	0	0	0	0	0	0	0	0	0	0	0	0	8.88512	9.92192	11.0111	12.1528	13.3468	14.5933	15.8922	17.2434	18.6471	20.1033	21.6118	25.9198	30.4328	35.1508	40.0738	45.2019	50.535	56.0731	61.8163	67.7645	73.9177	87.8739
891	0	0	0	0	0	0	0	0	0	0	0	0	0	0	0	0	0	0	0	0	0	0	0	0	0	0	0	0	0	0	0	0	0	0	0	0	0	0	0	0	0	0	0	0	0	0	0	0	0
894	0	0	0	0	0	0	0	0	0	0	0	0	0	0	0	0	0	0	0	0	0	0	0	0	0	0	0	0	0	0	0	0	0	0	0	0	0	0	0	0	0	0	0	0	0	0	0	0	0.302667
[truncated: 107 more columns]

## Sheet: upper2
ISO1	y-10000	y-9000	y-8000	y-7000	y-6000	y-5000	y-4000	y-3000	y-2000	y-1000	y0	y100	y200	y300	y400	y500	y600	y700	y800	y900	y1000	y1100	y1200	y1300	y1400	y1500	y1600	y1700	y1710	y1720	y1730	y1740	y1750	y1760	y1770	y1780	y1790	y1800	y1810	y1820	y1830	y1840	y1850	y1860	y1870	y1880	y1890	y1900	y1910
4	0	0	0	0	0	0	0	0	0	0	19.629	21.3013	22.8069	21.9526	21.1053	20.2651	19.432	18.0479	16.7202	15.618	14.5548	14.6065	14.5857	9.66237	9.7711	9.80779	11.4979	10.7423	16.6796	22.4525	28.0612	33.5055	38.7854	43.901	48.8523	53.6392	58.2618	62.7201	132.711	200.485	266.042	329.381	390.503	449.408	506.095	560.564	612.817	662.852	782.846
8	0	0	0	0	0	0	0	0	0	0	0	0	0	0	0	0	0	0	0	0	0	0	0	0	0	0	0	0.662394	0.712929	0.761861	0.809187	0.854909	0.899027	0.94154	0.982449	1.02175	1.05945	1.09555	2.01274	2.90073	3.75955	4.58917	5.3896	6.16084	6.9029	7.61576	8.29944	8.95393	16.6524
12	0	0	0	0	0	0	0	0	0	0	98.0032	91.5997	85.5167	79.7416	74.2627	69.0684	64.1475	59.4892	55.0831	56.5475	57.5682	52.7582	48.2228	40.0337	32.6206	31.0145	43.2346	31.1638	37.0207	42.7081	48.2259	53.5743	58.753	63.7623	68.6021	73.2723	77.773	82.1042	96.0887	109.597	122.628	135.184	147.262	158.864	169.99	180.639	190.812	200.508	199.073
16	0	0	0	0	0	0	0	0	0	0	0	0	0	0	0	0	0	0	0	0	0	0	0	0	0	0	0	0	0	0	0	0	0	0	0	0	0	0	0	0	0	0	0	0	0	0	0	0	0
20	0	0	0	0	0	0	0	0	0	0	0	0	0	0	0	0	0	0	0	0	0	0	0	0	0	0	0	0	0	0	0	0	0	0	0	0	0	0	0	0	0	0	0	0	0	0	0	0	0
24	0	0	0	0	0	0	0	0	0	0	0	0	0	0	0	0	0	0	0	0	0	0	0	0	1.39276	1.53809	1.57706	1.60911	2.22937	2.83228	3.41785	3.98607	4.53696	5.07049	5.58669	6.08554	6.56705	7.03121	8.33073	9.58627	10.7978	11.9654	13.0889	14.1685	15.2041	16.1957	17.1433	18.0469	20.9016
28	0	0	0	0	0	0	0	0	0	0	0	0	0	0	0	0	0	0	0	0	0	0	0	0	0	0	0	0	0	0	0	0	0	0	0	0	0	0	0	0	0	0	0	0	0	0	0	0	0
31	0	0	0	0	0	0	0	0	0	0	23.9757	25.1668	26.4008	27.6775	28.9965	30.3569	31.7576	33.197	34.6732	35.6924	36.6014	53.3728	69.11	83.8019	64.9585	78.5765	91.1244	102.592	111.612	120.351	128.81	136.988	144.885	152.501	159.837	166.892	173.666	180.159	241.712	301.254	358.786	414.308	467.82	519.322	568.814	616.295	661.767	705.228	680.032
32	0	0	0	0	0	0	0	0	0	0	0	0	0	0	0	0	0	0	0	3.92791	4.35504	4.82404	5.33817	5.90074	6.5151	7.18457	7.91236	8.70147	16.2299	23.5518	30.6671	37.5757	44.2778	50.7732	57.0621	63.1443	69.0199	74.6889	162.186	246.913	328.869	408.056	484.472	558.118	628.994	697.099	762.435	825	818.685
36	0	0	0	0	0	0	0	0	0	0	0	0	0	0	0	0	0	0	0	0	0	0	0	0	0	0	0	0	0	0	0	0	0	0	0	0	0	0	2.80335	3.68517	4.5376	5.36064	6.1543	6.91858	7.65347	8.35898	9.0351	41.9777	149.263
40	0	0	0	0	0	0	0	0	0	0	0	0	0	0	0	0	0	0	0	0	0	0	0	0	0	0	0	0.393128	0.482087	0.5685	0.652368	0.733689	0.812464	0.888694	0.962377	1.03351	1.10211	1.16815	0	0	0	0	0	0	0	0	0	7.66038	0.136284
44	0	0	0	0	0	0	0	0	0	0	0	0	0	0	0	0	0	0	0	0	0	0	0	0	0	0	0	0	0	0	0	0	0	0	0	0	0	0	0	0	0	0	0	0	0	0	0	0	0
48	0	0	0	0	0	0	0	0	0	0	0	0	0	0	0	0	0	0	0	0	0	0	0	0	0	0	0	0.224145	0.253794	0.282561	0.310446	0.337449	0.363569	0.388808	0.413164	0.436639	0.459231	0.480941	0.614348	0.743354	0.867961	0.988167	1.10397	1.21538	1.32238	1.42499	1.52319	1.617	1.5197
50	0	0	0	0	0	0	0	0	0	0	0	0	0	0	0	0	0	0	0	0	0	0	0	0	0	0	0	0	0	0	0	0	0	0	0	0	0	0	0	0	0	0	0	0	0	0	0	0	77.532
51	0	0	0	0	0	0	0	0	0	0	0	0	0	0	0	0	0	0	0	0	0	0	0	0	0	0	0	0.54964	0.671211	0.789299	0.903902	1.01502	1.12266	1.22681	1.32748	1.42466	1.51837	1.60858	3.19257	4.72629	6.20974	7.64291	9.02581	10.3584	11.6408	12.8729	14.0547	15.1862	28.0049
52	0	0	0	0	0	0	0	0	0	0	0	0	0	0	0	0	0	0	0	0	0	0	0	0	0	0	0	0	0	0	0	0	0	0	0	0	0	0	0	0	0	0	0	0	0	0	0	0	0.182
56	0	0	0	0	0	0	0	0	0	0	0	0	0	0	0	0	0	0	0	0	0	0	0	0	0	0	0	0.121634	0.140096	0.158015	0.175391	0.192224	0.208515	0.224263	0.239467	0.25413	0.268249	0.281825	0.520351	0.751287	0.974633	1.19039	1.39856	1.59914	1.79213	1.97753	2.15534	2.32556	1.92387
60	0	0	0	0	0	0	0	0	0	0	0	0	0	0	0	0	0	0	0	0	0	0	0	0	0	0	0	0	0	0	0	0	0	0	0	0	0	0	0	0	0	0	0	0	0	0	0	0	0
64	0	0	0	0	0	0	0	0	0	0	0	0	0	0	0	0	0	0	0	0	0	0	0	0	0	0	2.90601	3.17767	3.07964	2.9831	2.88807	2.79455	2.70253	2.61201	2.523	2.43549	2.34949	2.265	3.03113	3.77224	4.48832	5.17937	5.84538	6.48637	7.10232	7.69325	8.25914	8.8	8.736
68	0	0	0	0	0	0	0	0	0	0	0	0	0	0	0	0	0	0	0	0	0	0	0	0	0	0	0	0.841171	0.948724	1.05307	1.1542	1.25212	1.34683	1.43834	1.52663	1.61171	1.69358	1.77225	1.95448	2.13017	2.29932	2.46191	2.61796	2.76746	2.91042	3.04682	3.17669	3.3	15.834
70	0	0	0	0	0	0	0	0	0	0	0	0	0	0	0	0	0	0	0	0	0	0	0	0	0	0	0	0.135766	0.148665	0.161165	0.173269	0.184975	0.196283	0.207194	0.217707	0.227823	0.237541	0.246861	0.474757	0.695412	0.908827	1.115	1.31394	1.50563	1.69008	1.8673	2.03727	2.2	1.82
72	0	0	0	0	0	0	0	0	0	0	0	0	0	0	0	0	0	0	0	0	0	0	0	0	0	0	0	0	0	0	0	0	0	0	0	0	0	0	0	0	0	0	0	0	0	0	0	0	0.0784156
76	0	0	0	0	0	0	0	0	0	0	0	0	0	0	0	0	0	0	0	0	0	0	0	0	0	0	0	0.024	0.030932	0.037668	0.044208	0.050552	0.0567	0.062652	0.068408	0.073968	0.079332	0.0845	0.12608	0.16632	0.20522	0.24278	0.279	0.31388	0.34742	0.37962	0.41048	0.44	89.544
84	0	0	0	0	0	0	0	0	0	0	0	0	0	0	0	0	0	0	0	0	0	0	0	0	0	0	0	0	0	0	0	0	0	0	0	0	0	0	0	0	0	0	0	0	0	0	0	0	0
86	0	0	0	0	0	0	0	0	0	0	0	0	0	0	0	0	0	0	0	0	0	0	0	0	0	0	0	0	0	0	0	0	0	0	0	0	0	0	0	0	0	0	0	0	0	0	0	0	0
90	0	0	0	0	0	0	0	0	0	0	0	0	0	0	0	0	0	0	0	0	0	0	0	0	0	0	0	0	0	0	0	0	0	0	0	0	0	0	0	0	0	0	0	0	0	0	0	0	0
92	0	0	0	0	0	0	0	0	0	0	0	0	0	0	0	0	0	0	0	0	0	0	0	0	0	0	0	0	0	0	0	0	0	0	0	0	0	0	0	0	0	0	0	0	0	0	0	0	0
96	0	0	0	0	0	0	0	0	0	0	0	0	0	0	0	0	0	0	0	0	0	0	0	0	0	0	0	0	0	0	0	0	0	0	0	0	0	0	0	0	0	0	0	0	0	0	0	0	0
100	0	0	0	0	0	0	0	0	0	0	0	0	0	0	0	0	0	0	0	0	0	0	0	0	0	0	0	2.51433	2.77166	3.02112	3.26272	3.49646	3.72234	3.94036	4.15052	4.35282	4.54726	4.73384	8.03491	11.2305	14.3207	17.3055	20.1848	22.9587	25.6272	28.1902	30.6478	33	43.7759
104	0	0	0	0	0	0	0	0	0	3.33012	6.32814	6.79666	7.23541	7.6444	8.02363	8.37311	8.69284	8.98282	9.24306	9.47355	9.67429	11.7206	13.618	12.7323	14.6334	16.3708	17.7473	18.975	21.5266	24.0024	26.4024	28.7266	30.975	33.1476	35.2444	37.2654	39.2106	41.08	69.6192	97.2468	123.963	149.767	174.66	198.641	221.711	243.869	265.115	285.45	333.697
108	0	0	0	0	0	0	0	0	0	0	0	0	0	0	0	0	0	0	0	0	0	0	0	0	0	0	0	0	0	0	0	0	0	0	0	0	0	0	0	0	0	0	0	0	0	0	0	0	2.548
112	0	0	0	0	0	0	0	0	0	0	0	0	0	0	0	0	0	0	0	0	0	0	0	0	0	0	0	0.193903	0.236791	0.27845	0.31888	0.358082	0.396054	0.432797	0.468311	0.502596	0.535652	0.567479	1.12628	1.66735	2.19068	2.69628	3.18414	3.65427	4.10666	4.54131	4.95823	5.35742	7.81717
116	0	0	0	0	0	0	0	0	0	0	0	0	0	0	0	0	0	0	0	0	0	0	0	0	0	0	0	0.886302	1.09446	1.29667	1.49293	1.68325	1.86763	2.04606	2.21854	2.38508	2.54567	2.70032	4.00071	5.25917	6.47569	7.65027	8.78292	9.87364	10.9224	11.9293	12.8942	13.8171	21.5547
120	0	0	0	0	0	0	0	0	0	0	0	0	0	0	0	0	0	0	0	0	0	0	0	0	0	0	0	0	0	0	0	0	0	0	0	0	0	0	0	0	0	0	0	0	0	0	0	0	0.364
124	0	0	0	0	0	0	0	0	0	0	0	0	0	0	0	0	0	0	0	0	0	0	0	0	0	0	0	0	0	0	0	0	0	0	0	0	0	0	4.1472	8.1648	12.0528	15.8112	19.44	22.9392	26.3088	29.5488	32.6592	35.64	73.7025
132	0	0	0	0	0	0	0	0	0	0	0	0	0	0	0	0	0	0	0	0	0	0	0	0	0	0	0	0	0	0	0	0	0	0	0	0	0	0	0	0	0	0	0	0	0	0	0	0	0.238433
136	0	0	0	0	0	0	0	0	0	0	0	0	0	0	0	0	0	0	0	0	0	0	0	0	0	0	0	0	0	0	0	0	0	0	0	0	0	0	0	0	0	0	0	0	0	0	0	0	0
140	0	0	0	0	0	0	0	0	0	0	0	0	0	0	0	0	0	0	0	0	0	0	0	0	0	0	0	0	0	0	0	0	0	0	0	0	0	0	0	0	0	0	0	0	0	0	0	0	0
144	0	0	0	0	0	0	0	0	0	0	1.59992	1.79604	1.97257	2.12971	2.26767	2.38663	2.48678	2.5683	2.63134	2.67603	2.70247	2.87015	3.00078	2.72863	2.44168	2.43764	2.81112	3.08742	3.23437	3.37623	3.51301	3.64471	3.77132	3.89284	4.00929	4.12065	4.22692	4.32811	13.69	22.7573	31.53	40.008	48.1914	56.0801	63.6742	70.9737	77.9785	84.6886	117.001
148	0	0	0	0	0	0	0	0	0	0	0	0	0	0	0	0	0	0	0	0	0	0	0	0	0	0	0	0.371777	0.429854	0.486228	0.540898	0.593864	0.645127	0.694686	0.742542	0.788694	0.833142	0.875887	0.886949	0.897245	0.906773	0.915535	0.92353	0.930758	0.93722	0.942914	0.947842	0.952003	1.89016
152	0	0	0	0	0	0	0	0	0	0	61.9559	63.861	65.7343	67.562	69.3285	71.0159	72.6038	74.0686	75.3834	76.4431	76.94	79.5836	81.3089	82.1017	81.937	80.7731	73.6321	66.507	74.8515	82.9465	90.792	98.388	105.735	112.832	119.679	126.277	132.626	138.725	180.275	220.461	259.281	296.736	332.826	367.551	400.91	432.905	463.534	492.799	409.106
156	0	0	0	0	0	0	92.1668	201.515	395.426	775.644	2275	2248.93	2221.54	2192.83	2162.79	2131.43	2098.75	2064.74	2029.41	2287.29	2272.27	2253.97	2232.39	2207.54	2179.41	2690.29	2670.72	2645.25	2926.02	3198.25	3461.93	3717.08	3963.68	4201.74	4431.26	4652.24	4864.68	5068.57	5874.06	6651.94	7402.22	8124.88	8819.94	9487.39	10127.2	10739.5	11324.1	11881.1	13694.6
158	0	0	0	0	0	0	0	0	0	0	0	0	0	0	0	0	0	0	0	0	0	0	2.83766	2.99431	3.08332	3.09929	2.75693	11.9364	14.8042	17.5902	20.2944	22.9167	25.4573	27.916	30.293	32.5881	34.8014	36.9329	48.639	59.9614	70.9003	81.4557	91.6274	101.416	110.82	119.841	128.479	136.733	169.408
162	0	0	0	0	0	0	0	0	0	0	0	0	0	0	0	0	0	0	0	0	0	0	0	0	0	0	0	0	0	0	0	0	0	0	0	0	0	0	0	0	0	0	0	0	0	0	0	0	0
166	0	0	0	0	0	0	0	0	0	0	0	0	0	0	0	0	0	0	0	0	0	0	0	0	0	0	0	0	0	0	0	0	0	0	0	0	0	0	0	0	0	0	0	0	0	0	0	0	0
170	0	0	0	0	0	0	0	0	0	0	0	0	0	0	0	0	0	4.08112	4.11623	4.27146	4.37996	4.64602	4.83529	4.94546	4.97268	10.5902	7.73889	5.7	5.92	6.132	6.336	6.532	6.72	6.9	7.072	7.236	7.392	7.54	7.9616	8.3664	8.7544	9.1256	9.48	9.8176	10.1384	10.4424	10.7296	11	50.232
174	0	0	0	0	0	0	0	0	0	0	0	0	0	0	0	0	0	0	0	0	0	0	0	0	0	0	0	0	0	0	0	0	0	0	0	0	0	0	0	0	0	0	0	0	0	0	0	0	0
175	0	0	0	0	0	0	0	0	0	0	0	0	0	0	0	0	0	0	0	0	0	0	0	0	0	0	0	0	0	0	0	0	0	0	0	0	0	0	0	0	0	0	0	0	0	0	0	0	0
178	0	0	0	0	0	0	0	0	0	0	0	0	0	0	0	0	0	0	0	0	0	0	0	0	0	0	0	0	0	0	0	0	0	0	0	0	0	0	0	0	0	0	0	0	0	0	0	0	0
180	0	0	0	0	0	0	0	0	0	0	0	0	0	0	0	0	0	0	0	0	0	0	0	0	0	0	0	0	0	0	0	0	0	0	0	0	0	0	0	0	0	0	0	0	0	0	0	0	0
184	0	0	0	0	0	0	0	0	0	0	0	0	0	0	0	0	0	0	0	0	0	0	0	0	0	0	0	0	0	0	0	0	0	0	0	0	0	0	0	0	0	0	0	0	0	0	0	0	0
188	0	0	0	0	0	0	0	0	0	0	0	0	0	0	0	0	0	0	0	0	0	0	0	0	0	0	0	0.292987	0.346999	0.399445	0.450326	0.499642	0.547392	0.593577	0.638197	0.681251	0.72274	0.762663	1.96915	3.13757	4.26791	5.36019	6.4144	7.43054	8.40861	9.34861	10.2505	11.1144	13.9266
191	0	0	0	0	0	0	0	0	0	0	0	0	0	0	0	0	0	0	0	0	0	0	0	0	0	0	0	0.141039	0.153438	0.165451	0.177078	0.188319	0.199174	0.209644	0.219727	0.229424	0.238736	0.247661	0.475466	0.696033	0.909362	1.11545	1.31431	1.50592	1.6903	1.86744	2.03734	2.2	1.82
192	0	0	0	0	0	0	0	0	0	0	0	0	0	0	0	0	0	0	0	0	0	0	0	0	0	0	0	0.145609	0.217618	0.287628	0.355639	0.421652	0.485666	0.547681	0.607698	0.665716	0.721735	0.775756	1.4856	2.17289	2.83763	3.4798	4.09943	4.6965	5.27101	5.82296	6.35236	6.85921	14.3752
196	0	0	0	0	0	0	0	0	0	0	0	0	0	0	0	0	0	0	0	0	0	0	0	0	0	0	0	1.72865	1.79143	1.85189	1.91002	1.96584	2.01934	2.07052	2.11937	2.16591	2.21013	2.25203	2.97536	3.67499	4.35095	5.00321	5.63179	6.23668	6.81789	7.3754	7.90924	8.41938	10.9899
203	0	0	0	0	0	0	0	0	0	0	0	0	0	0	0	0	0	0	0	0	0	0	0	0	0	0	0	0.267311	0.260672	0.254116	0.247643	0.241254	0.234947	0.228724	0.222583	0.216526	0.210552	0.20466	0.395394	0.58007	0.758686	0.931244	1.09774	1.25818	1.41256	1.56089	1.70315	1.83935	1.52165
204	0	0	0	0	0	0	0	0	0	0	0	0	0	0	0	0	0	0	0	0	0	0	0	0	0	0	0	0	0	0	0	0	0	0	0	0	0	0	0	0	0	0	0	0	0	0	0	0	0
208	0	0	0	0	0	0	0	0	0	0	0	0	0	0	0	0	0	0	0	0	0	0	0	0	0	0	0	0.303666	0.321932	0.339594	0.356654	0.37311	0.388964	0.404214	0.418861	0.432905	0.446346	0.459184	0.988902	1.50185	1.99801	2.47741	2.94003	3.38588	3.81495	4.22724	4.62277	5.00152	7.44771
212	0	0	0	0	0	0	0	0	0	0	0	0	0	0	0	0	0	0	0	0	0	0	0	0	0	0	0	0	0	0	0	0	0	0	0	0	0	0	0	0	0	0	0	0	0	0	0	0	0
214	0	0	0	0	0	0	0	0	0	0	0	0	0	0	0	0	0	0	0	0	0	0	0	0	0	0	0	0.0556521	0.0607602	0.0657103	0.0705023	0.0751361	0.0796118	0.0839295	0.0880889	0.0920903	0.0959336	0.0996188	0.211969	0.320761	0.425994	0.527668	0.625784	0.72034	0.811337	0.898776	0.982656	1.06298	20.2256
218	0	0	0	0	0	0	0	0	0	0	0	0	0	0	0	0	0	0	0	0	0	0	0	0	0	0	0	0.279032	0.274116	0.269233	0.264382	0.259564	0.254777	0.250023	0.245301	0.240612	0.235955	0.23133	0.24192	0.252067	0.261773	0.271036	0.279857	0.288236	0.296173	0.303668	0.310721	0.317331	58.0168
222	0	0	0	0	0	0	0	0	0	0	0	0	0	0	0	0	0	0	0	0	0	0	0	0	0	0	0	0.0227947	0.0272232	0.0315238	0.0356965	0.0397413	0.0436581	0.0474471	0.0511082	0.0546413	0.0580466	0.061324	0.135352	0.207036	0.276378	0.343377	0.408033	0.470347	0.530317	0.587945	0.64323	0.696172	2.64925
226	0	0	0	0	0	0	0	0	0	0	0	0	0	0	0	0	0	0	0	0	0	0	0	0	0	0	0	0	0	0	0	0	0	0	0	0	0	0	0	0	0	0	0	0	0	0	0	0	0
231	0	0	0	0	0	0	0	0	0	0	0	0	0	0	0	0	0	3.90718	4.64147	4.50565	4.3699	4.23422	4.09862	3.9631	3.82766	3.69229	3.557	3.42179	3.75703	4.08198	4.39664	4.701	4.99507	5.27885	5.55233	5.81552	6.06841	6.31101	8.15253	9.93346	11.6538	13.3136	14.9128	16.4514	17.9294	19.3469	20.7037	22	43.6566
232	0	0	0	0	0	0	0	0	0	0	0	0	0	0	0	0	0	0	0	0	0	0	0	0	0	0	0	0.358579	0.408874	0.45768	0.504998	0.550827	0.595167	0.638019	0.679383	0.719258	0.757644	0.794542	0.824053	0.85226	0.879163	0.904761	0.929055	0.952045	0.973731	0.994113	1.01319	1.03096	2.0047
233	0	0	0	0	0	0	0	0	0	0	0	0	0	0	0	0	0	0	0	0	0	0	0	0	0	0	0	0	0	0	0	0	0	0	0	0	0	0	0	0	0	0	0	0	0	0	0	0	0.154225
234	0	0	0	0	0	0	0	0	0	0	0	0	0	0	0	0	0	0	0	0	0	0	0	0	0	0	0	0	0	0	0	0	0	0	0	0	0	0	0	0	0	0	0	0	0	0	0	0	0
238	0	0	0	0	0	0	0	0	0	0	0	0	0	0	0	0	0	0	0	0	0	0	0	0	0	0	0	0	0	0	0	0	0	0	0	0	0	0	0	0	0	0	0	0	0	0	0	0	0
242	0	0	0	0	0	0	0	0	0	0	0	0	0	0	0	0	0	0	0	0	0	0	0	0	0	0	0	0	0	0	0	0	0	0	0	0	0	0	0	0	0	0	0	0	0	0	0	0	0.182
246	0	0	0	0	0	0	0	0	0	0	0	0	0	0	0	0	0	0	0	0	0	0	0	0	0	0	0	0	0	0	0	0	0	0	0	0	0	0	0	0	0	0	0	0	0	0	0	0	0
250	0	0	0	0	0	0	0	0	0	0	12.9627	14.419	15.732	13.4255	11.2488	10.2791	9.35228	9.45971	9.5233	10.4475	11.2392	12.7139	16.2829	23.3814	15.0896	19.1419	21.7697	23.6187	25.0555	26.445	27.7872	29.082	30.3295	31.5296	32.6823	33.7878	34.8459	35.8566	57.3745	78.2027	98.3412	117.79	136.549	154.619	171.999	188.689	204.689	220	235.442
254	0	0	0	0	0	0	0	0	0	0	0	0	0	0	0	0	0	0	0	0	0	0	0	0	0	0	0	0	0	0	0	0	0	0	0	0	0	0	0	0	0	0	0	0	0	0	0	0	0.180895
258	0	0	0	0	0	0	0	0	0	0	0	0	0	0	0	0	0	0	0	0	0	0	0	0	0	0	0	0	0	0	0	0	0	0	0	0	0	0	0	0	0	0	0	0	0	0	0	0	0
262	0	0	0	0	0	0	0	0	0	0	0	0	0	0	0	0	0	0	0	0	0	0	0	0	0	0	0	0	0	0	0	0	0	0	0	0	0	0	0	0	0	0	0	0	0	0	0	0	0.0697787
266	0	0	0	0	0	0	0	0	0	0	0	0	0	0	0	0	0	0	0	0	0	0	0	0	0	0	0	0	0	0	0	0	0	0	0	0	0	0	0	0	0	0	0	0	0	0	0	0	0.728
268	0	0	0	0	0	0	0	0	0	0	2.43699	2.50556	2.57209	2.63593	2.69638	2.75258	2.80357	2.84823	2.88524	2.87213	2.83995	3.9806	4.93215	5.69507	4.16428	4.70958	5.01677	5.06068	5.48369	5.89345	6.28995	6.67319	7.04317	7.3999	7.74338	8.0736	8.39056	8.69426	11.645	14.4993	17.2572	19.9188	22.4839	24.9527	27.3251	29.6011	31.7807	33.8639	40.5887
270	0	0	0	0	0	0	0	0	0	0	0	0	0	0	0	0	0	0	0	0	0	0	0	0	0	0	0	1.59963	1.51991	1.44177	1.3652	1.29022	1.21681	1.14498	1.07473	1.00606	0.938964	0.873448	0.857397	0.841428	0.82554	0.809734	0.794009	0.778367	0.762806	0.747326	0.731928	0.716612	0.711401
275	0	0	0	0	0	0	0	0	0	0	0	0	0	0	0	0	0	0	0	0	0	0	0	0	0	0	0	0.112173	0.141742	0.170471	0.19836	0.22541	0.25162	0.276991	0.301522	0.325214	0.348066	0.370078	0.4498	0.526852	0.601235	0.672948	0.741993	0.808368	0.872074	0.933111	0.991479	1.04718	3.50925
276	0	0	0	0	0	0	0	0	0	0	0	0	0	0	0	0	0	0	0	0	2.61341	4.05279	6.37671	7.59094	3.89599	4.86496	5.11424	4.51114	5.10175	5.67478	6.23022	6.76807	7.28833	7.791	8.27608	8.74358	9.19349	9.62581	20.0499	30.1437	39.9071	49.3401	58.4427	67.2149	75.6568	83.7682	91.5493	99	108.475
288	0	0	0	0	0	0	0	0	0	0	0	0	0	0	0	0	0	0	0	0	0	0	0	0	0	0	0	1.89433	1.9502	2.00388	2.05537	2.10466	2.15176	2.19666	2.23938	2.2799	2.31823	2.35436	2.32931	2.30391	2.27816	2.25206	2.22561	2.19881	2.17167	2.14417	2.11633	2.08814	2.76393
292	0	0	0	0	0	0	0	0	0	0	0	0	0	0	0	0	0	0	0	0	0	0	0	0	0	0	0	0	0	0	0	0	0	0	0	0	0	0	0	0	0	0	0	0	0	0	0	0	0
296	0	0	0	0	0	0	0	0	0	0	0	0	0	0	0	0	0	0	0	0	0	0	0	0	0	0	0	0	0	0	0	0	0	0	0	0	0	0	0	0	0	0	0	0	0	0	0	0	0
300	0	0	0	0	0	0	0	0	0	0	11.3873	11.1193	10.8514	9.26054	7.73665	5.77737	3.91187	4.04248	4.15971	4.26353	4.35396	4.55759	4.78065	4.94007	3.43628	3.68412	5.32523	5.12428	5.56497	5.9919	6.40507	6.80449	7.19015	7.56206	7.9202	8.26459	8.59523	8.9121	17.8921	26.5872	34.9975	43.1228	50.9631	58.5186	65.7892	72.7748	79.4756	85.8914	132.163
304	0	0	0	0	0	0	0	0	0	0	0	0	0	0	0	0	0	0	0	0	0	0	0	0	0	0	0	0	0	0	0	0	0	0	0	0	0	0	0	0	0	0	0	0	0	0	0	0	0
308	0	0	0	0	0	0	0	0	0	0	0	0	0	0	0	0	0	0	0	0	0	0	0	0	0	0	0	0	0	0	0	0	0	0	0	0	0	0	0	0	0	0	0	0	0	0	0	0	0
312	0	0	0	0	0	0	0	0	0	0	0	0	0	0	0	0	0	0	0	0	0	0	0	0	0	0	0	0	0	0	0	0	0	0	0	0	0	0	0	0	0	0	0	0	0	0	0	0	0.0982827
316	0	0	0	0	0	0	0	0	0	0	0	0	0	0	0	0	0	0	0	0	0	0	0	0	0	0	0	0	0	0	0	0	0	0	0	0	0	0	0	0	0	0	0	0	0	0	0	0	0
320	0	0	0	0	0	0	0	0	0	0	0	0	0	0	0	0	0	0	3.09311	4.38034	5.49484	5.49197	5.44133	5.34105	5.18818	4.97794	3.35878	3.45646	3.47988	3.50141	3.52107	3.53885	3.55475	3.56877	3.58091	3.59118	3.59956	3.60607	5.38715	7.11084	8.77713	10.386	11.9375	13.4317	14.8684	16.2477	17.5697	18.8342	21.405
324	0	0	0	0	0	0	0	0	0	0	0	0	0	0	0	0	0	0	0	0	0	3.48425	3.8351	4.21638	4.62982	5.07707	5.55964	6.07881	6.11654	6.15106	6.18237	6.21047	6.23536	6.25704	6.27551	6.29077	6.30282	6.31165	6.2331	6.15396	6.07424	5.99395	5.91307	5.83162	5.74958	5.66697	5.58377	5.5	8.19
328	0	0	0	0	0	0	0	0	0	0	0	4.21868	5.06896	6.08251	7.28826	8.71951	10.4143	12.4156	14.7716	17.5357	20.7655	21.5793	22.17	24.2711	25.9207	27.1158	25.0647	25.4927	26.4677	27.4072	28.3112	29.1797	30.0126	30.8099	31.5717	32.298	32.9888	33.644	33.44	33.2262	33.0026	32.7692	32.526	32.273	32.0102	31.7376	31.4552	31.163	42.1603
332	0	0	0	0	0	0	0	0	0	0	0	0	0	0	0	0	0	0	0	0	0	0	0	0	0	0	0	0.0601794	0.129494	0.196914	0.262439	0.326069	0.387803	0.447643	0.505587	0.561637	0.615791	0.66805	1.23308	1.78012	2.30919	2.82029	3.3134	3.78853	4.24569	4.68487	5.10607	5.50929	9.11538
334	0	0	0	0	0	0	0	0	0	0	0	0	0	0	0	0	0	0	0	0	0	0	0	0	0	0	0	0	0	0	0	0	0	0	0	0	0	0	0	0	0	0	0	0	0	0	0	0	0
336	0	0	0	0	0	0	0	0	0	0	0	0	0	0	0	0	0	0	0	0	0	0	0	0	0	0	0	0	0	0	0	0	0	0	0	0	0	0	0	0	0	0	0	0	0	0	0	0	0
340	0	0	0	0	0	0	0	0	0	0	0	0	0	0	0	0	0	0	0	0	0	0	0	0	0	0	0	0.417973	0.451174	0.483328	0.514433	0.544491	0.573501	0.601462	0.628376	0.654242	0.67906	0.702829	1.45653	2.18634	2.89226	3.57429	4.23243	4.86668	5.47703	6.0635	6.62607	7.16475	12.7637
0	0	0	0	0	0	0	0	0	0	0	0	0	0	0	0	0	0	0	0	0	0	0	0	0	0	0	0	0	0	0	0	0	0	0	0	0	0	0	0	0	0	0	0	0	0	0	0	0	0
348	0	0	0	0	0	0	0	0	0	0	0	0	0	0	0	0	0	0	0	0	0	0	0	0	0	0	0	0.296938	0.358374	0.418043	0.475945	0.532079	0.586445	0.639045	0.689876	0.738941	0.786237	0.831767	1.65203	2.44626	3.21446	3.95663	4.67276	5.36286	6.02693	6.66496	7.27696	7.86293	15.1561
352	0	0	0	0	0	0	0	0	0	0	0	0	0	0	0	0	0	0	0	0	0	0	0	0	0	0	0	0	0	0	0	0	0	0	0	0	0	0	0	0	0	0	0	0	0	0	0	0	0
356	0	0	0	0	0	0	116.432	204.748	359.926	632.479	1110.99	1035.54	962.466	892.154	824.887	760.853	700.17	642.89	589.018	538.52	491.327	447.348	406.472	368.574	333.518	301.164	271.368	290.142	368.82	445.267	519.483	591.469	661.223	728.746	794.038	857.1	917.93	976.529	2380.1	3739.34	5054.25	6324.82	7551.07	8732.98	9870.57	10963.8	12012.7	13017.3	15202.7
360	0	0	0	0	0	0	0	0	0	0	0	4.58969	5.3772	6.26108	7.25058	8.35554	9.58641	10.9541	12.4703	14.1467	15.9959	19.1403	22.6511	26.5557	36.3453	44.878	49.0668	54.123	63.8223	73.24	82.376	91.2304	99.8031	108.094	116.104	123.831	131.278	138.442	250.681	359.346	464.437	565.954	663.896	758.265	849.06	936.281	1019.93	1100	1619.8
364	0	0	0	0	3.79033	21.0716	108.615	114.793	83.9704	81.0886	119.248	118.734	117.91	116.79	115.389	113.723	111.806	96.5643	82.4688	81.8522	80.9371	80.5898	79.8807	52.5546	52.8176	52.7335	61.5583	54.123	61.9258	66.3593	70.6485	74.7933	78.7936	82.6496	86.3612	89.9284	93.3512	96.6296	124.029	150.525	176.119	200.81	224.598	247.484	269.467	290.547	310.725	330	1128.4
368	0	0	0	2.5575	4.27409	22.8969	202.325	249.473	245.658	275.353	161.972	162.023	161.511	153.488	145.67	131.781	118.769	196.382	264.634	224.268	187.363	153.779	113.096	76.8157	71.5653	66.5006	77.027	38.8457	59.3993	61.783	64.0793	66.2884	68.4102	70.4447	72.3919	74.2518	76.0244	77.7097	105.907	133.186	159.546	184.987	209.511	233.115	255.801	277.569	298.418	318.348	426.645
372	0	0	0	0	0	0	0	0	0	0	0	0	0	0	0	0	0	0	0	0	0	0	0	0	0	0	0	0	0	0	0	0	0	0	0	0	0	0	0	0	0	0	0	0	0	0	0	0	0
376	0	0	0	0	0	0	0	0	0	0	0	0	0	0	0	0	0	0	0	0	0	0	0	0	0	0	0	2.25376	2.60699	2.94986	3.28238	3.60453	3.91633	4.21776	4.50884	4.78956	5.05992	5.31992	6.2992	7.24532	8.15828	9.03808	9.88472	10.6982	11.4785	12.2257	12.9397	13.6205	31.7003
380	0	0	0	0	0	0	0	0	0	0	0	11.5567	161.488	141.694	123.612	78.1461	37.5442	52.213	64.8566	68.1963	73.5657	85.6827	104.293	142.551	85.3793	89.2632	121.879	114.856	124.624	134.086	143.243	152.095	160.641	168.882	176.817	184.447	191.772	198.791	342.641	481.9	616.568	746.645	872.131	993.026	1109.33	1221.04	1328.17	1430.7	1802.49
384	0	0	0	0	0	0	0	0	0	0	0	0	0	0	0	0	0	0	0	0	0	0	0	0	0	0	0	0.217032	0.244856	0.27185	0.298014	0.323347	0.347851	0.371524	0.394367	0.41638	0.437562	0.457914	0.523543	0.5869	0.647986	0.706801	0.763345	0.817618	0.86962	0.919351	0.966811	1.012	1.50696
388	0	0	0	0	0	0	0	0	0	0	0	0	0	0	0	0	0	0	0	0	0	0	0	0	0	0	0	0.230586	0.352205	0.470454	0.585333	0.696842	0.804981	0.90975	1.01115	1.10918	1.20384	1.29512	1.97712	2.63718	3.2753	3.89149	4.48575	5.05807	5.60845	6.1369	6.64342	7.128	9.9008
392	0	0	0	0	0	0	0	0	0	0	0	23.1463	31.0823	46.7776	60.9859	87.2986	110.852	151.953	180.489	218.503	211.98	212.306	166.169	176.097	207.049	250.586	313.343	438.085	473.546	507.89	541.118	573.23	604.226	634.105	662.869	690.515	717.046	742.46	983.534	1216.72	1442.01	1659.41	1868.92	2070.54	2264.28	2450.12	2628.06	2798.12	2815.22
398	0	0	0	0	0	0	0	0	0	0	0	0	0	0	0	0	0	0	3.02551	3.67227	4.45331	5.39535	6.53009	7.89499	9.5342	11.4996	13.8518	16.6613	22.7507	28.6695	34.4178	39.9954	45.4025	50.639	55.7049	60.6002	65.325	69.8791	158.809	244.925	328.23	408.721	486.4	561.266	633.32	702.561	768.989	832.605	847.446
400	0	0	0	0	0	0	0	0	0	0	0	0	0	0	0	0	0	0	0	0	0	0	0	0	0	0	0	1.57529	1.64905	1.72026	1.7889	1.85498	1.91849	1.97945	2.03784	2.09368	2.14695	2.19766	3.11626	4.0051	4.86417	5.69349	6.49304	7.26282	8.00285	8.71311	9.3936	10.0443	13.4612
404	0	0	0	0	0	0	0	0	0	0	0	0	0	0	0	0	0	0	0	0	0	0	0	0	0	0	0	1.3578	1.58443	1.80444	2.01783	2.22462	2.42478	2.61834	2.80527	2.9856	3.15931	3.3264	3.54931	3.76364	3.96942	4.16663	4.35527	4.53535	4.70686	4.86981	5.02419	5.17001	6.67213
408	0	0	0	0	0	0	0	0	0	0	0	4.40334	5.40005	6.61162	8.08062	9.85668	11.997	14.5668	17.6387	18.7235	19.5592	21.974	27.2922	18.9502	20.3095	21.105	23.6484	25.9322	31.9171	37.7309	43.3737	48.8453	54.1458	59.2752	64.2335	69.0207	73.6368	78.0819	94.8324	111.022	126.651	141.718	156.225	170.17	183.555	196.378	208.641	220.343	265.866
410	0	0	0	0	0	0	0	0	0	0	0	0	4.1727	5.48607	7.19952	9.42884	12.3204	16.0579	20.8686	22.1237	23.0757	25.8758	32.0625	22.1947	23.6896	24.4758	27.1864	29.3719	37.7908	45.9716	53.9143	61.6188	69.0852	76.3135	83.3037	90.0557	96.5696	102.845	127.439	151.214	174.172	196.312	217.633	238.137	257.822	276.69	294.739	311.971	376.385
414	0	0	0	0	0	0	0	0	0	0	0	0	0	0	0	0	0	0	0	0	0	0	0	0	0	0	0	0.21553	0.22573	0.235577	0.24507	0.25421	0.262997	0.27143	0.27951	0.287237	0.29461	0.30163	0.339354	0.375755	0.410832	0.444585	0.477014	0.508119	0.5379	0.566357	0.593491	0.6193	0.51233
417	0	0	0	0	0	0	0	0	0	0	0	27.4067	28.2772	29.1415	29.9947	30.8318	31.647	32.4335	33.1841	33.0063	32.7077	33.5316	34.1058	34.433	34.5156	34.3553	36.7061	38.4333	45.803	52.9596	59.9033	66.6339	73.1515	79.456	85.5476	91.426	97.0915	102.544	133.595	163.626	192.637	220.629	247.601	273.553	298.486	322.399	345.293	367.167	393.625
418	0	0	0	0	0	0	0	0	0	0	0	0	0	0	0	0	0	0	0	0	0	0	0	0	0	0	0	0.373834	0.414662	0.454252	0.492604	0.529717	0.565593	0.60023	0.633629	0.66579	0.696713	0.726397	1.04802	1.35925	1.66007	1.9505	2.23052	2.50015	2.75937	3.00819	3.24662	3.47464	4.7908
422	0	0	0	0	0	0	0	0	0	0	12.9917	14.1984	15.4934	16.878	14.3628	12.1975	10.3351	8.73481	7.36104	6.52878	5.74584	5.66976	5.54837	5.37894	3.93325	3.81021	3.95455	2.92763	2.95604	2.98263	3.00739	3.03034	3.05145	3.07075	3.08822	3.10387	3.1177	3.1297	3.99174	4.82534	5.63049	6.4072	7.15547	7.87529	8.56667	9.22961	9.8641	10.4701	15.1185
426	0	0	0	0	0	0	0	0	0	0	0	0	0	0	0	0	0	0	0	0	0	0	0	0	0	0	0	0	0	0	0	0	0	0	0	0	0	0	0	0	0	0	0	0	0	0	0	0	0.0462244
428	0	0	0	0	0	0	0	0	0	0	0	0	0	0	0	0	0	0	0	0	0	0	0	0	0	0	0	0	0	0	0	0	0	0	0	0	0	0	0	0	0	0	0	0	0	0	0	0	0.0283325
430	0	0	0	0	0	0	0	0	0	0	0	0	0	0	0	0	0	0	0	0	0	0	0	0	0	0	0	0	0	0	0	0	0	0	0	0	0	0	0	0	0	0	0	0	0	0	0	0	0
434	0	0	0	0	0	0	0	0	0	0	20.3802	22.6361	24.8139	22.0169	19.2795	19.9267	20.532	21.0939	21.6107	21.6393	21.6374	14.8265	8.28424	12.1364	15.7846	19.2209	18.6977	18.1614	19.8447	21.476	23.0552	24.5824	26.0575	27.4807	28.8517	30.1708	31.4378	32.6527	34.0554	35.3984	36.682	37.906	39.0705	40.1755	41.2209	42.2068	43.1332	44	51.2063
438	0	0	0	0	0	0	0	0	0	0	0	0	0	0	0	0	0	0	0	0	0	0	0	0	0	0	0	0	0	0	0	0	0	0	0	0	0	0	0	0	0	0	0	0	0	0	0	0	0
440	0	0	0	0	0	0	0	0	0	0	0	0	0	0	0	0	0	0	0	0	0	0	0	0	0	0	0	0	0	0	0	0	0	0	0	0	0	0	0	0	0	0	0	0	0	0	0	0	0.138838
442	0	0	0	0	0	0	0	0	0	0	0	0	0	0	0	0	0	0	0	0	0	0	0	0	0	0	0	0	0	0	0	0	0	0	0	0	0	0	0	0	0	0	0	0	0	0	0	0	0
446	0	0	0	0	0	0	0	0	0	0	0	0	0	0	0	0	0	0	0	0	0	0	0	0	0	0	0	0	0	0	0	0	0	0	0	0	0	0	0	0	0	0	0	0	0	0	0	0	0
450	0	0	0	0	0	0	0	0	0	0	0	0	0	0	0	0	0	0	0	0	0	0	0	0	0	2.90558	3.39358	3.83461	4.40432	4.95725	5.49339	6.01276	6.51535	7.00116	7.47019	7.92244	8.35791	8.7766	9.05082	9.31225	9.56089	9.79675	10.0198	10.2301	10.4276	10.6123	10.7842	10.9433	63.3716
454	0	0	0	0	0	0	0	0	0	0	0	0	0	0	0	0	0	0	0	0	0	0	0	0	0	0	0	0	0	0	0	0	0	0	0	0	0	0	0	0	0	0	0	0	0	0	0	0	0.174719
458	0	0	0	0	0	0	0	0	0	0	0	0	0	0	0	0	0	0	0	0	0	3.57623	4.03012	4.4468	4.82627	5.16854	6.2257	7.18889	8.22095	9.22252	10.1936	11.1342	12.0443	12.924	13.7731	14.5918	15.38	16.1377	27.1005	37.7129	47.975	57.8868	67.4482	76.6592	85.5199	94.0303	102.19	110	132.496
462	0	0	0	0	0	0	0	0	0	0	0	0	0	0	0	0	0	0	0	0	0	0	0	0	0	0	0	0	0	0	0	0	0	0	0	0	0	0	0	0	0	0	0	0	0	0	0	0	0
466	0	0	0	0	0	0	0	0	0	0	0	0	0	0	0	0	0	0	0	0	0	0	0	2.49473	2.66153	2.76391	3.0875	3.37337	3.83114	4.27533	4.70593	5.12295	5.52637	5.91621	6.29246	6.65512	7.00419	7.33968	7.46408	7.58107	7.69064	7.7928	7.88754	7.97486	8.05477	8.12726	8.19233	8.24999	15.015
470	0	0	0	0	0	0	0	0	0	0	0	0	0	0	0	0	0	0	0	0	0	0	0	0	0	0	0	0.0144082	0.0156453	0.0168437	0.0180035	0.0191247	0.0202072	0.0212511	0.0222564	0.0232231	0.0241511	0.0250405	0.0458976	0.0660908	0.0856203	0.104486	0.122688	0.140226	0.1571	0.17331	0.188856	0.203739	0.337096
474	0	0	0	0	0	0	0	0	0	0	0	0	0	0	0	0	0	0	0	0	0	0	0	0	0	0	0	0.0350473	0.0535287	0.0714979	0.0889551	0.1059	0.122333	0.138254	0.153662	0.168559	0.182943	0.196815	0.284173	0.368707	0.450416	0.5293	0.60536	0.678595	0.749006	0.816592	0.881353	0.94329	0.93643
478	0	0	0	0	0	0	0	0	0	0	0	0	0	0	0	0	0	0	0	0	0	0	0	3.45178	3.61209	3.71956	4.15066	4.52997	5.1238	5.69995	6.25841	6.7992	7.3223	7.82772	8.31546	8.78552	9.2379	9.67259	9.8514	10.02	10.1783	10.3264	10.4643	10.5919	10.7093	10.8164	10.9133	11	10.947
480	0	0	0	0	0	0	0	0	0	0	0	0	0	0	0	0	0	0	0	0	0	0	0	0	0	0	0	0.00483446	0	0	0	0	0	0	0	0	0	0.0721738	0	0	0	0	0	0	0	0	0	0.287865	0
484	0	0	0	0	0	0	0	0	0	0	133.452	140.262	147.335	154.67	162.266	170.12	178.229	186.583	195.175	222.804	249.685	279.855	309.018	337.077	363.929	389.471	15.3181	60.1615	71.2628	82.0425	92.5004	102.637	112.451	121.944	131.115	139.964	148.492	156.698	238.57	317.809	394.414	468.384	539.721	608.425	674.494	737.929	798.731	856.899	1134.22
492	0	0	0	0	0	0	0	0	0	0	0	0	0	0	0	0	0	0	0	0	0	0	0	0	0	0	0	0	0	0	0	0	0	0	0	0	0	0	0	0	0	0	0	0	0	0	0	0	0
496	0	0	0	0	0	0	0	0	0	0	0	0	0	0	0	0	0	0	0	0	0	0	0	0	0	0	0	0.178518	0.215311	0.251046	0.285721	0.319339	0.351897	0.383396	0.413837	0.443219	0.471543	0.498807	0.72854	0.950853	1.16575	1.37322	1.57328	1.76592	1.95114	2.12894	2.29932	2.46228	2.71597
498	0	0	0	0	0	0	0	0	0	0	0	0	0	0	0	0	0	0	0	0	0	0	0	0	0	0	0	1.01361	1.24345	1.46672	1.68341	1.89352	2.09705	2.29401	2.48439	2.66819	2.84541	3.01606	5.98794	8.86549	11.6487	14.3376	16.9322	19.4325	21.8384	24.1501	26.3674	28.4904	40.8014
500	0	0	0	0	0	0	0	0	0	0	0	0	0	0	0	0	0	0	0	0	0	0	0	0	0	0	0	0	0	0	0	0	0	0	0	0	0	0	0	0	0	0	0	0	0	0	0	0	0
504	0	0	0	0	0	0	0	0	0	0	20.697	21.043	21.3676	21.6683	21.9424	22.187	22.3991	22.5758	22.7139	23.2315	23.5578	20.9476	18.533	19.2799	16.0429	12.3874	17.1646	12.292	14.5976	16.8365	19.0087	21.1141	23.1527	25.1247	27.0298	28.8683	30.64	32.3449	38.0287	43.5194	48.8169	53.9212	58.8324	63.5504	68.0752	72.4068	76.5453	80.4906	221.959
508	0	0	0	0	0	0	0	0	0	0	0	0	0	0	0	0	0	0	0	0	3.25541	4.60529	5.84903	6.98781	8.02282	8.9553	10.7308	12.3253	13.7732	15.1775	16.5383	17.8555	19.129	20.3591	21.5455	22.6884	23.7877	24.8434	26.3671	27.8312	29.2358	30.5808	31.8662	33.0921	34.2584	35.3652	36.4124	37.4	10.9878
512	0	0	0	0	0	0	0	0	0	0	0	0	0	0	0	0	0	0	0	0	0	0	0	0	0	0	0	0	0	0	0	0	0	0	0	0	0	0	2.56	5.04	7.44	9.76	12	14.16	16.24	18.24	20.16	22	21.84
516	0	0	0	0	0	0	0	0	0	0	0	0	0	0	0	0	0	0	0	0	0	0	0	0	0	0	0	0.133843	0.178238	0.221386	0.263285	0.303936	0.34334	0.381495	0.418402	0.45406	0.488471	0.521634	0.590248	0.656467	0.720291	0.78172	0.840754	0.897393	0.951637	1.00349	1.05294	1.1	1.638
520	0	0	0	0	0	0	0	0	0	0	0	0	0	0	0	0	0	0	0	0	0	0	0	0	0	0	0	0	0	0	0	0	0	0	0	0	0	0	0	0	0	0	0	0	0	0	0	0	0
524	0	0	0	0	0	0	0	0	0	0	0	0	0	0	0	0	0	0	0	0	0	0	0	0	0	0	0	1.03849	1.2951	1.54441	1.7864	2.02108	2.24846	2.46852	2.68128	2.88672	3.08486	3.27569	4.78436	6.24432	7.65555	9.01806	10.3319	11.5969	12.8133	13.9809	15.0998	16.17	26.117
528	0	0	0	0	0	0	0	0	0	0	0	0	0	0	0	0	0	0	0	0	0	0	0	0	0.710835	1.03709	1.33781	1.61299	1.63771	1.66118	1.68341	1.70438	1.72411	1.74258	1.75981	1.77578	1.79051	1.80399	3.45582	5.05516	6.60201	8.09638	9.53825	10.9276	12.2646	13.549	14.7809	15.9603	26.4071
530	0	0	0	0	0	0	0	0	0	0	0	0	0	0	0	0	0	0	0	0	0	0	0	0	0	0	0	0	0	0	0	0	0	0	0	0	0	0	0	0	0	0	0	0	0	0	0	0	0
533	0	0	0	0	0	0	0	0	0	0	0	0	0	0	0	0	0	0	0	0	0	0	0	0	0	0	0	0	0	0	0	0	0	0	0	0	0	0	0	0	0	0	0	0	0	0	0	0	0
540	0	0	0	0	0	0	0	0	0	0	0	0	0	0	0	0	0	0	0	0	0	0	0	0	0	0	0	0	0	0	0	0	0	0	0	0	0	0	0	0	0	0	0	0	0	0	0	0	0.364
548	0	0	0	0	0	0	0	0	0	0	0	0	0	0	0	0	0	0	0	0	0	0	0	0	0	0	0	0	0	0	0	0	0	0	0	0	0	0	0	0	0	0	0	0	0	0	0	0	0
554	0	0	0	0	0	0	0	0	0	0	0	0	0	0	0	0	0	0	0	0	0	0	0	0	0	0	0	0	0	0	0	0	0	0	0	0	0	0	4.10656	8.08479	11.9347	15.6563	19.2495	22.7144	26.051	29.2592	32.3392	35.2907	40.7139
558	0	0	0	0	0	0	0	0	0	0	0	0	0	0	0	0	0	0	0	0	0	0	0	0	0	0	0	0.101505	0.11761	0.133244	0.148406	0.163096	0.177315	0.191061	0.204336	0.217138	0.229469	0.241328	0.427148	0.607045	0.78102	0.949071	1.1112	1.26741	1.41769	1.56205	1.70048	1.833	4.24589
562	0	0	0	0	0	0	0	0	0	0	0	0	0	0	0	0	0	0	0	0	0	0	0	0	0	0	0	0.80796	0.913612	1.01612	1.11548	1.21169	1.30475	1.39467	1.48144	1.56507	1.64555	1.72288	1.75477	1.78483	1.81307	1.83948	1.86407	1.88683	1.90777	1.92689	1.94418	1.95964	4.21501
566	0	0	0	0	0	0	0	0	0	0	0	0	0	0	0	0	0	0	0	0	0	0	0	0	0	0	0	1.35881	1.47334	1.58428	1.69164	1.79541	1.8956	1.9922	2.08522	2.17466	2.2605	2.34277	2.36275	2.38097	2.39745	2.41218	2.42515	2.43637	2.44585	2.45357	2.45954	2.46377	29.2143
570	0	0	0	0	0	0	0	0	0	0	0	0	0	0	0	0	0	0	0	0	0	0	0	0	0	0	0	0	0	0	0	0	0	0	0	0	0	0	0	0	0	0	0	0	0	0	0	0	0
574	0	0	0	0	0	0	0	0	0	0	0	0	0	0	0	0	0	0	0	0	0	0	0	0	0	0	0	0	0	0	0	0	0	0	0	0	0	0	0	0	0	0	0	0	0	0	0	0	0
578	0	0	0	0	0	0	0	0	0	0	0	0	0	0	0	0	0	0	0	0	0	0	0	0	0	0	0	0	0	0	0	0	0	0	0	0	0	0	0	0	0	0	0	0	0	0	0	0	1.33993
580	0	0	0	0	0	0	0	0	0	0	0	0	0	0	0	0	0	0	0	0	0	0	0	0	0	0	0	0	0	0	0	0	0	0	0	0	0	0	0	0	0	0	0	0	0	0	0	0	0
583	0	0	0	0	0	0	0	0	0	0	0	0	0	0	0	0	0	0	0	0	0	0	0	0	0	0	0	0	0	0	0	0	0	0	0	0	0	0	0	0	0	0	0	0	0	0	0	0	0
584	0	0	0	0	0	0	0	0	0	0	0	0	0	0	0	0	0	0	0	0	0	0	0	0	0	0	0	0	0	0	0	0	0	0	0	0	0	0	0	0	0	0	0	0	0	0	0	0	0
585	0	0	0	0	0	0	0	0	0	0	0	0	0	0	0	0	0	0	0	0	0	0	0	0	0	0	0	0	0	0	0	0	0	0	0	0	0	0	0	0	0	0	0	0	0	0	0	0	0.546
586	0	0	0	0	0	0	277.342	412.434	613.109	911.089	1353.37	1289.72	1222.6	1167.39	1108.28	1046.79	984.137	963.999	934.583	924.792	903.641	827.236	755.465	664.269	660.73	616.582	702.19	756.02	844.11	929.547	1012.33	1092.46	1169.94	1244.76	1316.93	1386.45	1453.32	1517.53	1840.77	2153.18	2454.76	2745.51	3025.42	3294.51	3552.77	3800.19	4036.78	4262.55	5091.38
591	0	0	0	0	0	0	0	0	0	0	0	0	0	0	0	0	0	0	0	0	0	0	0	0	0	0	0	0.396848	0.443034	0.487829	0.531232	0.573245	0.613866	0.653096	0.690934	0.727382	0.762438	0.796102	1.43242	2.04847	2.64426	3.21977	3.77502	4.31	4.82472	5.31916	5.79334	6.24725	7.22021
598	0	0	0	0	0	0	0	0	0	0	0	0	0	0	0	0	0	0	0	0	0	0	0	0	0	0	0	0	0	0	0	0	0	0	0	0	0	0	0	0	0	0	0	0	0	0	0	0	0
600	0	0	0	0	0	0	0	0	0	0	0	0	0	0	0	0	0	0	0	0	0	0	0	0	0	0	0	0	0	0	0	0	0	0	0	0	0	0	0	0	0	0	0	0	0	0	0	0	5.46
604	0	0	0	0	0	0	0	0	0	88.9696	91.291	92.9127	94.4183	95.7879	96.999	98.0265	98.8417	99.4122	99.7001	105.72	110.298	109.976	108.635	106.223	102.654	97.7894	28.2862	28.2979	27.7932	27.2921	26.7944	26.3001	25.8092	25.3218	24.8379	24.3573	23.8802	23.4066	35.078	46.3733	57.2927	67.8361	78.0036	87.795	97.2105	106.25	114.913	123.201	262.719
608	0	0	0	0	0	0	0	0	0	0	0	0	0	0	0	0	0	0	0	0	0	0	0	0	0	3.12642	4.81993	7.24637	10.0386	12.7528	15.3888	17.9468	20.4268	22.8286	25.1524	27.3981	29.5657	31.6552	76.523	119.973	162.006	202.622	241.821	279.602	315.965	350.912	384.441	416.552	470.182
612	0	0	0	0	0	0	0	0	0	0	0	0	0	0	0	0	0	0	0	0	0	0	0	0	0	0	0	0	0	0	0	0	0	0	0	0	0	0	0	0	0	0	0	0	0	0	0	0	0
616	0	0	0	0	0	0	0	0	0	0	0	0	0	0	0	0	0	0	0	0	0	0	0	0	0	0	0	0.248512	0.27433	0.299361	0.323604	0.34706	0.369728	0.39161	0.412703	0.43301	0.452529	0.471261	1.02049	1.55234	2.06679	2.56385	3.04353	3.50581	3.9507	4.3782	4.78831	5.18104	21.4307
620	0	0	0	0	0	0	0	0	0	0	9.79244	10.4462	10.0144	9.58494	9.15767	7.85918	6.6472	6.30967	5.97307	7.04627	7.95146	9.30797	10.4083	13.3892	8.86097	11.7854	16.8711	15.2678	16.7611	18.2087	19.6103	20.9661	22.276	23.5401	24.7583	25.9306	27.0571	28.1377	50.5344	72.2176	93.1873	113.444	132.987	151.816	169.932	187.335	204.024	220	255.122
624	0	0	0	0	0	0	0	0	0	0	0	0	0	0	0	0	0	0	0	0	0	0	0	0	0	0	0	2.00185	2.06059	2.11702	2.17114	2.22296	2.27246	2.31966	2.36454	2.40712	2.44739	2.48535	2.4584	2.4311	2.40345	2.37544	2.34709	2.31837	2.28931	2.25989	2.23012	2.2	4.914
626	0	0	0	0	0	0	0	0	0	0	0	0	0	0	0	0	0	0	0	0	0	0	0	0	0	0	0	0	0	0	0	0	0	0	0	0	0	0	0	0	0	0	0	0	0	0	0	0	0
630	0	0	0	0	0	0	0	0	0	0	0	0	0	0	0	0	0	0	0	0	0	0	0	0	0	0	0	0.0154838	0.0416957	0.0671935	0.0919773	0.116047	0.139403	0.162045	0.183972	0.205186	0.225686	0.245472	0.697837	1.13595	1.5598	1.96941	2.36476	2.74585	3.11269	3.46527	3.8036	4.12768	4.96686
634	0	0	0	0	0	0	0	0	0	0	0	0	0	0	0	0	0	0	0	0	0	0	0	0	0	0	0	0	0	0	0	0	0	0	0	0	0	0	0	0	0	0	0	0	0	0	0	0	0.0889528
638	0	0	0	0	0	0	0	0	0	0	0	0	0	0	0	0	0	0	0	0	0	0	0	0	0	0	0	0	0	0	0	0	0	0	0	0	0	0	0	0	0	0	0	0	0	0	0	0	0
642	0	0	0	0	0	0	0	0	0	0	0	0	0	0	0	0	0	0	0	0	0	0	0	0	0	0	0	0.0508591	0.0605991	0.0700575	0.0792344	0.0881297	0.0967434	0.105075	0.113126	0.120895	0.128382	0.135588	0.251793	0.364302	0.473113	0.578228	0.679647	0.777369	0.871394	0.961723	1.04836	1.13129	4.79174
643	0	0	0	0	0	0	0	0	0	0	0	0	0	0	0	0	0	0	0	0	0	1.08503	1.57588	1.57744	1.52397	1.8945	2.28201	2.48869	3.07457	3.64372	4.19614	4.73183	5.25079	5.75302	6.23851	6.70727	7.15931	7.59461	11.1841	14.6577	18.0156	21.2576	24.3838	27.3942	30.2887	33.0674	35.7303	38.2774	191.137
646	0	0	0	0	0	0	0	0	0	0	0	0	0	0	0	0	0	0	0	0	0	0	0	0	0	0	0	0	0	0	0	0	0	0	0	0	0	0	0	0	0	0	0	0	0	0	0	0	0.728
654	0	0	0	0	0	0	0	0	0	0	0	0	0	0	0	0	0	0	0	0	0	0	0	0	0	0	0	0	0	0	0	0	0	0	0	0	0	0	0	0	0	0	0	0	0	0	0	0	0
659	0	0	0	0	0	0	0	0	0	0	0	0	0	0	0	0	0	0	0	0	0	0	0	0	0	0	0	0.0018519	0.00220172	0.00254142	0.002871	0.00319046	0.00349979	0.003799	0.00408809	0.00436706	0.00463591	0.00489463	0.0066414	0.00833122	0.00996411	0.0115401	0.0130591	0.0145211	0.0159263	0.0172744	0.0185657	0.0198	0.01638
660	0	0	0	0	0	0	0	0	0	0	0	0	0	0	0	0	0	0	0	0	0	0	0	0	0	0	0	0	0	0	0	0	0	0	0	0	0	0	0	0	0	0	0	0	0	0	0	0	0
662	0	0	0	0	0	0	0	0	0	0	0	0	0	0	0	0	0	0	0	0	0	0	0	0	0	0	0	0	0	0	0	0	0	0	0	0	0	0	0	0	0	0	0	0	0	0	0	0	0.182
666	0	0	0	0	0	0	0	0	0	0	0	0	0	0	0	0	0	0	0	0	0	0	0	0	0	0	0	0	0	0	0	0	0	0	0	0	0	0	0	0	0	0	0	0	0	0	0	0	0
670	0	0	0	0	0	0	0	0	0	0	0	0	0	0	0	0	0	0	0	0	0	0	0	0	0	0	0	0	0	0	0	0	0	0	0	0	0	0	0	0	0	0	0	0	0	0	0	0	0
674	0	0	0	0	0	0	0	0	0	0	0	0	0	0	0	0	0	0	0	0	0	0	0	0	0	0	0	0	0	0	0	0	0	0	0	0	0	0	0	0	0	0	0	0	0	0	0	0	0
678	0	0	0	0	0	0	0	0	0	0	0	0	0	0	0	0	0	0	0	0	0	0	0	0	0	0	0	0.321179	0.385062	0.447104	0.507302	0.565659	0.622173	0.676845	0.729675	0.780662	0.829807	0.877109	1.03325	1.1841	1.32964	1.46988	1.60482	1.73446	1.8588	1.97783	2.09157	2.2	3.64
682	0	0	0	0	0	0	0	0	0	0	0	0	0	0	0	0	0	0	0	0	0	0	0	0	0	0	0	0.459084	0.64366	0.823082	0.99735	1.16646	1.33042	1.48923	1.64288	1.79138	1.93472	2.07291	3.75692	5.38731	6.96407	8.48721	9.95673	11.3726	12.7349	14.0436	15.2986	16.5	76.076
686	0	0	0	0	0	0	0	0	0	0	0	0	0	0	0	4.14305	5.05412	6.16079	7.50365	9.13136	11.102	13.4849	16.3625	19.8324	24.01	29.0314	35.0557	42.2692	42.5595	42.8267	43.0708	43.2918	43.4897	43.6646	43.8164	43.9451	44.0508	44.1333	43.5889	43.0403	42.4875	41.9305	41.3692	40.8038	40.2342	39.6603	39.0823	38.5	44.59
690	0	0	0	0	0	0	0	0	0	0	0	0	0	0	0	0	0	0	0	0	0	0	0	0	0	0	0	0	0	0	0	0	0	0	0	0	0	0	0	0	0	0	0	0	0	0	0	0	0
694	0	0	0	0	0	0	0	0	0	0	0	0	0	0	0	0	0	0	0	0	0	0	0	0	0	0	0	0.171872	0.188626	0.204866	0.220592	0.235802	0.250498	0.264679	0.278345	0.291496	0.304133	0.316255	0.323847	0.33105	0.337864	0.344288	0.350324	0.355969	0.361226	0.366093	0.370571	0.374659	0.371935
702	0	0	0	0	0	0	0	0	0	0	0	0	0	0	0	0	0	0	0	0	0	0	0	0	0	0	0	0	0	0	0	0	0	0	0	0	0	0	0	0	0	0	0	0	0	0	0	0	0
703	0	0	0	0	0	0	0	0	0	0	0	0	0	0	0	0	0	0	0	0	0	0	0	0	0	0	0	0.00795737	0.00868534	0.00939078	0.0100737	0.010734	0.0113718	0.0119871	0.0125798	0.01315	0.0136976	0.0142227	0.0240109	0.0334863	0.042649	0.051499	0.0600363	0.0682609	0.0761728	0.0837719	0.0910583	0.098032	0.0810992
704	0	0	0	0	0	0	0	0	0	0	0	0	0	0	0	0	0	0	0	0	3.66356	4.61398	5.49631	6.31075	7.05743	7.73647	9.31692	10.7564	14.4165	17.9738	21.4283	24.78	28.0289	31.175	34.2183	37.1588	39.9965	42.7314	76.2666	108.733	140.131	170.461	199.722	227.915	255.039	281.094	306.081	330	455
705	0	0	0	0	0	0	0	0	0	0	0	0	0	0	0	0	0	0	0	0	0	0	0	0	0	0	0	0.0311314	0.0340461	0.0368707	0.0396053	0.04225	0.0448047	0.0472693	0.049644	0.0519287	0.0541234	0.0562281	0.108095	0.158314	0.206885	0.253808	0.299083	0.342711	0.38469	0.425022	0.463706	0.500742	0.41425
706	0	0	0	0	0	0	0	0	0	0	0	0	0	0	0	0	0	0	0	0	0	0	0	0	0	0	0	0.785281	1.17771	1.55924	1.92989	2.28965	2.63852	2.9765	3.30359	3.61979	3.92511	4.21953	5.61115	6.95726	8.25785	9.51292	10.7225	11.8865	13.005	14.078	15.1055	16.0875	18.6323
710	0	0	0	0	0	0	0	0	0	0	0	0	0	0	0	0	0	0	0	0	0	0	0	0	0	0	2.80377	7.70848	9.09327	10.4379	11.7422	13.0064	14.2304	15.4141	16.5577	17.6611	18.7242	19.7472	69.211	117.12	163.473	208.271	251.514	293.202	333.334	371.911	408.933	444.4	514.696
716	0	0	0	0	0	0	0	0	0	0	0	0	0	0	0	0	0	0	0	0	0	0	0	0	0	0	0	0.838322	0.957989	1.07412	1.18671	1.29577	1.40129	1.50328	1.60173	1.69664	1.78801	1.87585	2.1359	2.38691	2.62889	2.86185	3.08578	3.30068	3.50655	3.7034	3.89121	4.07	6.22534
724	0	0	0	0	0	0	0	0	0	0	59.4892	61.7396	58.3666	54.9581	48.4942	42.0686	43.1412	44.1291	45.0265	45.8277	50.7564	60.9751	81.5871	58.6006	67.6982	86.3527	79.088	86.6165	93.9865	101.126	108.035	114.714	121.163	127.381	133.368	139.125	144.652	149.949	251.573	349.95	445.08	536.961	625.594	710.98	793.118	872.007	947.649	1020.04	1172.96
732	0	0	0	0	0	0	0	0	0	0	0	0	0	0	0	0	0	0	0	0	0	0	0	0	0	0	0	0	0	0	0	0	0	0	0	0	0	0	0	0	0	0	0	0	0	0	0	0	0
736	0	0	0	0	0	0	0	0	0	0	30.4326	30.7907	31.1341	31.4616	31.7714	32.0619	32.3315	32.5781	32.8	34.3868	35.8338	35.9792	36.0506	37.8679	39.4953	40.9313	42.5039	43.8587	51.621	59.1577	66.4688	73.5543	80.4142	87.0485	93.4572	99.6403	105.598	111.33	124.255	136.723	148.734	160.287	171.383	182.021	192.202	201.926	211.191	220	297.667
740	0	0	0	0	0	0	0	0	0	0	0	0	0	0	0	0	0	0	0	0	0	0	0	0	0	0	0	0.102245	0.113553	0.124518	0.135141	0.145421	0.155359	0.164955	0.174208	0.183118	0.191686	0.199912	0.202753	0.205409	0.20788	0.210166	0.212267	0.214183	0.215915	0.217461	0.218823	0.22	0.182
744	0	0	0	0	0	0	0	0	0	0	0	0	0	0	0	0	0	0	0	0	0	0	0	0	0	0	0	0	0	0	0	0	0	0	0	0	0	0	0	0	0	0	0	0	0	0	0	0	0
748	0	0	0	0	0	0	0	0	0	0	0	0	0	0	0	0	0	0	0	0	0	0	0	0	0	0	0	0	0	0	0	0	0	0	0	0	0	0	0	0	0	0	0	0	0	0	0	0	5.89684
752	0	0	0	0	0	0	0	0	0	0	0	0	0	0	0	0	0	0	0	0	0	0	0	0	0	0	0	0	0	0	0	0	0	0	0	0	0	0	0	0	0	0	0	0	0	0	0	0	1.00719
756	0	0	0	0	0	0	0	0	0	0	0	0	0	0	0	0	0	0	0	0	0	0	0	0	0	0	0	1.36588	1.46122	1.55348	1.64268	1.72881	1.81188	1.89187	1.96879	2.04265	2.11343	2.18115	4.04553	5.85061	7.59637	9.28282	10.91	12.4778	13.9863	15.4355	16.8254	18.156	18.024
760	0	0	0	0	0	0.0127259	26.9547	29.9123	25.247	29.7137	32.7725	43.7646	58.4061	77.894	60.5568	47.0441	36.5187	28.3253	21.9516	39.133	18.5107	19.076	19.583	20.0305	15.5832	16.2223	18.371	17.8991	18.5365	19.1502	19.7402	20.3065	20.8492	21.3682	21.8635	22.3351	22.7831	23.2074	28.4059	33.4308	38.2821	42.9598	47.4638	51.7943	55.9511	59.9344	63.744	67.38	151.446
762	0	0	0	0	0	0	0	0	0	0	10.5884	10.9026	11.2106	11.5101	11.7984	12.0725	12.3289	12.5636	12.7721	12.6901	12.5415	12.3257	12.5431	12.6211	12.5558	12.3404	12.6889	12.7107	15.7645	18.7312	21.6108	24.4032	27.1086	29.7268	32.2579	34.702	37.0588	39.3286	51.794	63.8509	75.4994	86.7394	97.571	107.994	118.009	127.615	136.813	145.602	177.688
764	0	0	0	0	0	0	0	0	0	0	0	0	0	0	0	0	0	0	0	0	0	0	0	0	0	0	0	1.28151	1.61005	1.92925	2.2391	2.53962	2.83079	3.11262	3.38511	3.64826	3.90207	4.14654	8.72265	13.1538	17.4399	21.581	25.5771	29.4282	33.1344	36.6955	40.1116	43.3828	268.596
768	0	0	0	0	0	0	0	0	0	0	0	0	0	0	0	0	0	0	0	0	0	0	0	0	0	0	0	0.66248	0.70675	0.749585	0.790984	0.830948	0.869477	0.906571	0.94223	0.976453	1.00924	1.04059	1.03221	1.02358	1.01472	1.00561	0.996274	0.986696	0.976879	0.966824	0.956531	0.946	0.93912
772	0	0	0	0	0	0	0	0	0	0	0	0	0	0	0	0	0	0	0	0	0	0	0	0	0	0	0	0	0	0	0	0	0	0	0	0	0	0	0	0	0	0	0	0	0	0	0	0	0
776	0	0	0	0	0	0	0	0	0	0	0	0	0	0	0	0	0	0	0	0	0	0	0	0	0	0	0	0	0	0	0	0	0	0	0	0	0	0	0	0	0	0	0	0	0	0	0	0	0
780	0	0	0	0	0	0	0	0	0	0	0	0	0	0	0	0	0	0	0	0	0	0	0	0	0	0	0	0	0	0	0	0	0	0	0	0	0	0	0	0	0	0	0	0	0	0	0	0	0.3094
784	0	0	0	0	0	0	0	0	0	0	0	0	0	0	0	0	0	0	0	0	0	0	0	0	0	0	0	2.24722	2.23729	2.22682	2.21582	2.20426	2.19217	2.17954	2.16636	2.15265	2.13839	2.12359	2.54421	2.95066	3.34295	3.72108	4.08504	4.43483	4.77046	5.09192	5.39922	5.69235	9.88494
788	0	0	0	0	0	0	0	0	0	0	46.9583	51.1616	55.0173	50.5505	46.2848	42.2166	38.3427	36.9702	42.2939	41.7785	41.2022	37.5985	37.9751	36.3956	27.871	26.6437	31.7931	24.2434	26.461	28.6099	30.6901	32.7017	34.6446	36.5188	38.3243	40.0612	41.7294	43.329	50.1295	56.6968	63.0306	69.1311	74.9983	80.6321	86.0326	91.1997	96.1335	100.834	99.6147
792	0	0	0	1.57194	4.63309	28.8189	46.3629	61.9309	116.739	163.067	198.184	207.731	216.218	193.826	172.509	152.263	133.084	140.517	146.87	155.058	161.867	112.575	125.9	137.027	103.798	104.541	124.024	120.599	128.215	135.582	142.699	149.567	156.186	162.555	168.676	174.546	180.168	185.54	214.976	243.402	270.819	297.227	322.626	347.016	370.397	392.769	414.132	434.485	515.568
795	0	0	0	0	0	0	0	0	0	0	27.794	28.9021	30.0336	31.1867	32.3594	33.5492	34.7535	35.969	37.1922	36.9782	36.6933	37.7922	38.7092	39.4473	40.3765	42.1555	46.9974	49.6407	56.9379	64.02	70.8869	77.5388	83.9756	90.1972	96.2037	101.995	107.571	112.933	139.719	165.613	190.616	214.728	237.949	260.278	281.716	302.262	321.917	340.681	443.872
796	0	0	0	0	0	0	0	0	0	0	0	0	0	0	0	0	0	0	0	0	0	0	0	0	0	0	0	0	0	0	0	0	0	0	0	0	0	0	0	0	0	0	0	0	0	0	0	0	0
798	0	0	0	0	0	0	0	0	0	0	0	0	0	0	0	0	0	0	0	0	0	0	0	0	0	0	0	0	0	0	0	0	0	0	0	0	0	0	0	0	0	0	0	0	0	0	0	0	0
800	0	0	0	0	0	0	0	0	0	0	0	0	0	0	0	0	0	0	0	0	0	0	0	0	0	0	0	0	0	0	0	0	0	0	0	0	0	0	0	0	0	0	0	0	0	0	0	0	0.23471
804	0	0	0	0	0	0	0	0	0	0	0	0	0	0	0	0	0	0	0	0	0	0	0	0	0	0	0	0.00871497	0.00990904	0.0110677	0.0121909	0.0132788	0.0143312	0.0153482	0.0163298	0.0172759	0.0181867	0.019062	0.0451477	0.070409	0.0948459	0.118458	0.141247	0.163211	0.18435	0.204666	0.224156	0.242823	64.5962
807	0	0	0	0	0	0	0	0	0	0	0	0	0	0	0	0	0	0	0	0	0	0	0	0	0	0	0	0	0	0	0	0	0	0	0	0	0	0	0	0	0	0	0	0	0	0	0	0	0
818	0	0	0	0	96.7859	426.573	1890	2120	2210	2295	2500	2587.65	2668.24	2741.76	2808.24	2867.65	2920	2965.29	3003.53	3034.71	3058.82	3075.88	3085.88	3088.82	3084.71	3073.53	3188.13	3285.65	3263.34	3240.44	3216.96	3192.9	3168.26	3143.04	3117.24	3090.86	3063.89	3036.35	3008.22	2979.52	2950.23	2920.36	2889.91	2858.88	2827.27	2795.08	2762.31	2728.96	2724.97
826	0	0	0	0	0	0	0	0	0	0	0	0	0	0	0	0	0	0	0	0	0	0	0	0	0	0	0	0	0	0	0	0	0	0	0	0	0	0	0	0	0	0	0	0	0	0	0	0	10.9993
834	0	0	0	0	0	0	0	0	0	0	0	0	0	0	0	0	0	0	0	0	0	0	0	0	0	0	0	0	0	0	0	0	0	0	0	0	0	0	0	0	0	0	0	0	0	0	0	0	3.64
840	0	0	0	0	0	0	0	0	0	0	0	0	0	0	0	0	0	0	8.40866	9.21695	9.96784	10.4786	11.2995	11.9098	12.8662	13.6476	6.21813	7.5855	9.20541	10.7788	12.3057	13.7861	15.2199	16.6072	17.9481	19.2424	20.4902	21.6914	422.67	811.107	1187	1550.36	1901.17	2239.45	2565.18	2878.37	3179.02	3467.13	5659.56
850	0	0	0	0	0	0	0	0	0	0	0	0	0	0	0	0	0	0	0	0	0	0	0	0	0	0	0	0	0	0	0	0	0	0	0	0	0	0	0	0	0	0	0	0	0	0	0	0	0
854	0	0	0	0	0	0	0	0	0	0	0	0	0	0	0	0	0	0	0	0	0	0	0	0	0	0	0	0.386644	0.412292	0.437108	0.461091	0.484242	0.50656	0.528046	0.548699	0.56852	0.587508	0.605664	0.600711	0.595622	0.590397	0.585035	0.579537	0.573903	0.568132	0.562224	0.55618	0.55	0.819
858	0	0	0	0	0	0	0	0	0	0	0	0	0	0	0	0	0	0	0	0	0	0	0	0	0	0	0	0	0	0	0	0	0	0	0	0	0	0	0	0	0	0	0	0	0	0	0	0	2.79665
860	0	0	0	0	0	0	0	0	0	0	71.4155	74.9634	78.6393	82.4426	86.3717	90.4242	94.5967	98.8846	103.282	104.837	106.145	111.214	115.799	119.894	123.495	127.61	140.942	153.012	175.423	197.174	218.263	238.692	258.46	277.567	296.014	313.799	330.924	347.387	429.822	509.513	586.461	660.666	732.128	800.847	866.823	930.055	990.545	1048.29	1191.45
862	0	0	0	0	0	0	0	0	0	0	0	0	0	0	0	0	0	0	0	0	0	0	0	0	0	0	0	0.209162	0.208007	0.206808	0.205564	0.204277	0.202945	0.201569	0.200149	0.198685	0.197177	0.195625	0.219401	0.242341	0.264444	0.285709	0.306138	0.325729	0.344483	0.362401	0.379481	0.395724	33.0645
876	0	0	0	0	0	0	0	0	0	0	0	0	0	0	0	0	0	0	0	0	0	0	0	0	0	0	0	0	0	0	0	0	0	0	0	0	0	0	0	0	0	0	0	0	0	0	0	0	0
882	0	0	0	0	0	0	0	0	0	0	0	0	0	0	0	0	0	0	0	0	0	0	0	0	0	0	0	0	0	0	0	0	0	0	0	0	0	0	0	0	0	0	0	0	0	0	0	0	0
887	0	0	0	0	0	0	0	0	0	0	0	0	0	0	0	0	0	0	0	0	0	0	0	0	0	0	0	26.6554	28.2393	29.7709	31.25	32.6767	34.051	35.3729	36.6423	37.8594	39.024	40.1362	46.0796	51.8179	57.3513	62.6796	67.8028	72.7211	77.4343	81.9425	86.2457	90.3438	105.681
891	0	0	0	0	0	0	0	0	0	0	0	0	0	0	0	0	0	0	0	0	0	0	0	0	0	0	0	0	0	0	0	0	0	0	0	0	0	0	0	0	0	0	0	0	0	0	0	0	0
894	0	0	0	0	0	0	0	0	0	0	0	0	0	0	0	0	0	0	0	0	0	0	0	0	0	0	0	0	0	0	0	0	0	0	0	0	0	0	0	0	0	0	0	0	0	0	0	0	0.364
[truncated: 107 more columns]

## Sheet: 2grid
ISO1	y-10000	y-9000	y-8000	y-7000	y-6000	y-5000	y-4000	y-3000	y-2000	y-1000	y0	y100	y200	y300	y400	y500	y600	y700	y800	y900	y1000	y1100	y1200	y1300	y1400	y1500	y1600	y1700	y1710	y1720	y1730	y1740	y1750	y1760	y1770	y1780	y1790	y1800	y1810	y1820	y1830	y1840	y1850	y1860	y1870	y1880	y1890	y1900	y1910
4	0	0	0	0	0	0	0	0	0	0	7.85159	8.72583	9.57326	9.44794	9.31922	9.18683	9.05052	8.64267	8.23895	7.92556	7.61329	7.88286	8.12975	5.56815	5.82837	6.063	7.37603	7.16152	11.27	15.3785	19.4869	23.5954	27.7039	31.8123	35.9208	40.0293	44.1377	48.2462	103.681	159.115	214.55	269.985	325.419	380.854	436.289	491.723	547.158	602.592	716.892
8	0	0	0	0	0	0	0	0	0	0	0	0	0	0	0	0	0	0	0	0	0	0	0	0	0	0	0	0.441596	0.481709	0.521822	0.561936	0.602049	0.642162	0.682276	0.722389	0.762502	0.802615	0.842729	1.57245	2.30217	3.03189	3.76161	4.49133	5.22105	5.95077	6.6805	7.41022	8.13994	15.2495
12	0	0	0	0	0	0	0	0	0	0	39.2013	37.5228	35.8959	34.3192	32.7913	31.311	29.8769	28.4878	27.1424	28.6957	30.1126	28.4727	26.8783	23.0703	19.4579	19.1726	27.7354	20.7759	25.014	29.2521	33.4902	37.7283	41.9665	46.2046	50.4427	54.6808	58.9189	63.157	75.0693	86.9816	98.8939	110.806	122.719	134.631	146.543	158.455	170.368	182.28	182.301
16	0	0	0	0	0	0	0	0	0	0	0	0	0	0	0	0	0	0	0	0	0	0	0	0	0	0	0	0	0	0	0	0	0	0	0	0	0	0	0	0	0	0	0	0	0	0	0	0	0
20	0	0	0	0	0	0	0	0	0	0	0	0	0	0	0	0	0	0	0	0	0	0	0	0	0	0	0	0	0	0	0	0	0	0	0	0	0	0	0	0	0	0	0	0	0	0	0	0	0
24	0	0	0	0	0	0	0	0	0	0	0	0	0	0	0	0	0	0	0	0	0	0	0	0	0.830769	0.95082	1.0117	1.07274	1.50633	1.93992	2.37351	2.80709	3.24068	3.67427	4.10786	4.54145	4.97504	5.40862	6.50839	7.60815	8.70791	9.80767	10.9074	12.0072	13.107	14.2067	15.3065	16.4062	19.1406
28	0	0	0	0	0	0	0	0	0	0	0	0	0	0	0	0	0	0	0	0	0	0	0	0	0	0	0	0	0	0	0	0	0	0	0	0	0	0	0	0	0	0	0	0	0	0	0	0	0
31	0	0	0	0	0	0	0	0	0	0	9.59029	10.3093	11.0818	11.9118	12.8036	13.7618	14.7912	15.8972	17.0853	18.1125	19.1454	28.8044	38.5203	48.2926	38.7472	48.5746	58.4572	68.3946	75.4135	82.4325	89.4514	96.4703	103.489	110.508	117.527	124.546	131.565	138.584	188.837	239.09	289.344	339.597	389.85	440.103	490.357	540.61	590.863	641.116	622.74
32	0	0	0	0	0	0	0	0	0	0	0	0	0	0	0	0	0	0	0	1.99327	2.27802	2.60345	2.97537	3.40043	3.8862	4.44137	5.07585	5.80098	10.9662	16.1314	21.2966	26.4618	31.627	36.7922	41.9574	47.1226	52.2878	57.453	126.708	195.962	265.217	334.472	403.726	472.981	542.236	611.491	680.745	750	749.712
36	0	0	0	0	0	0	0	0	0	0	0	0	0	0	0	0	0	0	0	0	0	0	0	0	0	0	0	0	0	0	0	0	0	0	0	0	0	0	2.19012	2.92473	3.65935	4.39397	5.12859	5.8632	6.59782	7.33244	8.06705	38.1615	136.688
40	0	0	0	0	0	0	0	0	0	0	0	0	0	0	0	0	0	0	0	0	0	0	0	0	0	0	0	0.262085	0.325735	0.389384	0.453033	0.516682	0.580332	0.643981	0.70763	0.77128	0.834929	0.898578	0	0	0	0	0	0	0	0	0	6.96398	0.124803
44	0	0	0	0	0	0	0	0	0	0	0	0	0	0	0	0	0	0	0	0	0	0	0	0	0	0	0	0	0	0	0	0	0	0	0	0	0	0	0	0	0	0	0	0	0	0	0	0	0
48	0	0	0	0	0	0	0	0	0	0	0	0	0	0	0	0	0	0	0	0	0	0	0	0	0	0	0	0.14943	0.171482	0.193535	0.215587	0.23764	0.259692	0.281745	0.303797	0.32585	0.347902	0.369955	0.479959	0.589964	0.699968	0.809973	0.919977	1.02998	1.13999	1.24999	1.36	1.47	1.39167
50	0	0	0	0	0	0	0	0	0	0	0	0	0	0	0	0	0	0	0	0	0	0	0	0	0	0	0	0	0	0	0	0	0	0	0	0	0	0	0	0	0	0	0	0	0	0	0	0	71
51	0	0	0	0	0	0	0	0	0	0	0	0	0	0	0	0	0	0	0	0	0	0	0	0	0	0	0	0.366427	0.453521	0.540616	0.62771	0.714804	0.801899	0.888993	0.976088	1.06318	1.15028	1.23737	2.4942	3.75102	5.00785	6.26468	7.5215	8.77833	10.0352	11.292	12.5488	13.8056	25.6455
52	0	0	0	0	0	0	0	0	0	0	0	0	0	0	0	0	0	0	0	0	0	0	0	0	0	0	0	0	0	0	0	0	0	0	0	0	0	0	0	0	0	0	0	0	0	0	0	0	0.166667
56	0	0	0	0	0	0	0	0	0	0	0	0	0	0	0	0	0	0	0	0	0	0	0	0	0	0	0	0.0810896	0.0946596	0.108229	0.121799	0.135369	0.148939	0.162509	0.176079	0.189649	0.203219	0.216789	0.406524	0.596259	0.785995	0.97573	1.16547	1.3552	1.54494	1.73467	1.92441	2.11414	1.76178
60	0	0	0	0	0	0	0	0	0	0	0	0	0	0	0	0	0	0	0	0	0	0	0	0	0	0	0	0	0	0	0	0	0	0	0	0	0	0	0	0	0	0	0	0	0	0	0	0	0
64	0	0	0	0	0	0	0	0	0	0	0	0	0	0	0	0	0	0	0	0	0	0	0	0	0	0	1.86424	2.11845	2.08083	2.04322	2.00561	1.96799	1.93038	1.89276	1.85515	1.81753	1.77992	1.7423	2.36807	2.99384	3.61961	4.24538	4.87115	5.49692	6.12269	6.74846	7.37423	8	8
68	0	0	0	0	0	0	0	0	0	0	0	0	0	0	0	0	0	0	0	0	0	0	0	0	0	0	0	0.560781	0.641029	0.721278	0.801527	0.881775	0.962024	1.04227	1.12252	1.20277	1.28302	1.36327	1.52694	1.69061	1.85429	2.01796	2.18163	2.34531	2.50898	2.67265	2.83633	3	14.5
70	0	0	0	0	0	0	0	0	0	0	0	0	0	0	0	0	0	0	0	0	0	0	0	0	0	0	0	0.0905108	0.100449	0.110387	0.120326	0.130264	0.140202	0.15014	0.160079	0.170017	0.179955	0.189893	0.370904	0.551915	0.732925	0.913936	1.09495	1.27596	1.45697	1.63798	1.81899	2	1.66667
72	0	0	0	0	0	0	0	0	0	0	0	0	0	0	0	0	0	0	0	0	0	0	0	0	0	0	0	0	0	0	0	0	0	0	0	0	0	0	0	0	0	0	0	0	0	0	0	0	0.0718091
76	0	0	0	0	0	0	0	0	0	0	0	0	0	0	0	0	0	0	0	0	0	0	0	0	0	0	0	0.016	0.0209	0.0258	0.0307	0.0356	0.0405	0.0454	0.0503	0.0552	0.0601	0.065	0.0985	0.132	0.1655	0.199	0.2325	0.266	0.2995	0.333	0.3665	0.4	82
84	0	0	0	0	0	0	0	0	0	0	0	0	0	0	0	0	0	0	0	0	0	0	0	0	0	0	0	0	0	0	0	0	0	0	0	0	0	0	0	0	0	0	0	0	0	0	0	0	0
86	0	0	0	0	0	0	0	0	0	0	0	0	0	0	0	0	0	0	0	0	0	0	0	0	0	0	0	0	0	0	0	0	0	0	0	0	0	0	0	0	0	0	0	0	0	0	0	0	0
90	0	0	0	0	0	0	0	0	0	0	0	0	0	0	0	0	0	0	0	0	0	0	0	0	0	0	0	0	0	0	0	0	0	0	0	0	0	0	0	0	0	0	0	0	0	0	0	0	0
92	0	0	0	0	0	0	0	0	0	0	0	0	0	0	0	0	0	0	0	0	0	0	0	0	0	0	0	0	0	0	0	0	0	0	0	0	0	0	0	0	0	0	0	0	0	0	0	0	0
96	0	0	0	0	0	0	0	0	0	0	0	0	0	0	0	0	0	0	0	0	0	0	0	0	0	0	0	0	0	0	0	0	0	0	0	0	0	0	0	0	0	0	0	0	0	0	0	0	0
100	0	0	0	0	0	0	0	0	0	0	0	0	0	0	0	0	0	0	0	0	0	0	0	0	0	0	0	1.67622	1.87274	2.06926	2.26578	2.4623	2.65882	2.85534	3.05186	3.24838	3.44489	3.64141	6.27727	8.91313	11.549	14.1848	16.8207	19.4566	22.0924	24.7283	27.3641	30	40.0878
104	0	0	0	0	0	0	0	0	0	1.30593	2.53125	2.78417	3.03708	3.28999	3.5429	3.79581	4.04872	4.30163	4.55455	4.80747	5.0604	6.32539	7.59036	7.33726	8.72871	10.1202	11.3851	12.65	14.545	16.44	18.335	20.23	22.125	24.02	25.915	27.81	29.705	31.6	54.39	77.18	99.97	122.76	145.55	168.34	191.13	213.92	236.71	259.5	305.583
108	0	0	0	0	0	0	0	0	0	0	0	0	0	0	0	0	0	0	0	0	0	0	0	0	0	0	0	0	0	0	0	0	0	0	0	0	0	0	0	0	0	0	0	0	0	0	0	0	2.33333
112	0	0	0	0	0	0	0	0	0	0	0	0	0	0	0	0	0	0	0	0	0	0	0	0	0	0	0	0.129269	0.159994	0.190719	0.221445	0.25217	0.282896	0.313621	0.344346	0.375072	0.405797	0.436522	0.879908	1.32329	1.76668	2.21007	2.65345	3.09684	3.54022	3.98361	4.42699	4.87038	7.15858
116	0	0	0	0	0	0	0	0	0	0	0	0	0	0	0	0	0	0	0	0	0	0	0	0	0	0	0	0.590868	0.739498	0.888129	1.03676	1.18539	1.33402	1.48265	1.63128	1.77991	1.92854	2.07717	3.12556	4.17394	5.22233	6.27072	7.3191	8.36749	9.41588	10.4643	11.5126	12.561	19.7388
120	0	0	0	0	0	0	0	0	0	0	0	0	0	0	0	0	0	0	0	0	0	0	0	0	0	0	0	0	0	0	0	0	0	0	0	0	0	0	0	0	0	0	0	0	0	0	0	0	0.333333
124	0	0	0	0	0	0	0	0	0	0	0	0	0	0	0	0	0	0	0	0	0	0	0	0	0	0	0	0	0	0	0	0	0	0	0	0	0	0	3.24	6.48	9.72	12.96	16.2	19.44	22.68	25.92	29.16	32.4	67.4932
132	0	0	0	0	0	0	0	0	0	0	0	0	0	0	0	0	0	0	0	0	0	0	0	0	0	0	0	0	0	0	0	0	0	0	0	0	0	0	0	0	0	0	0	0	0	0	0	0	0.218345
136	0	0	0	0	0	0	0	0	0	0	0	0	0	0	0	0	0	0	0	0	0	0	0	0	0	0	0	0	0	0	0	0	0	0	0	0	0	0	0	0	0	0	0	0	0	0	0	0	0
140	0	0	0	0	0	0	0	0	0	0	0	0	0	0	0	0	0	0	0	0	0	0	0	0	0	0	0	0	0	0	0	0	0	0	0	0	0	0	0	0	0	0	0	0	0	0	0	0	0
144	0	0	0	0	0	0	0	0	0	0	0.639969	0.735729	0.827993	0.916585	1.00131	1.08194	1.15823	1.22989	1.2966	1.35799	1.4136	1.54897	1.67257	1.57243	1.45644	1.5069	1.80336	2.05828	2.18538	2.31249	2.43959	2.56669	2.6938	2.8209	2.94801	3.07511	3.20221	3.32932	10.6953	18.0614	25.4274	32.7935	40.1595	47.5255	54.8916	62.2576	69.6236	76.9897	107.144
148	0	0	0	0	0	0	0	0	0	0	0	0	0	0	0	0	0	0	0	0	0	0	0	0	0	0	0	0.247851	0.290442	0.333033	0.375624	0.418214	0.460805	0.503396	0.545987	0.588578	0.631168	0.673759	0.692929	0.712099	0.731269	0.750439	0.769608	0.788778	0.807948	0.827118	0.846288	0.865458	1.73092
152	0	0	0	0	0	0	0	0	0	0	24.7824	26.1599	27.5922	29.0773	30.6126	32.1939	33.8155	35.4695	37.1454	38.792	40.2456	42.9499	45.3197	47.3128	48.8747	49.9325	47.2357	44.338	50.5753	56.8127	63.05	69.2873	75.5247	81.762	87.9993	94.2366	100.474	106.711	140.84	174.969	209.098	243.226	277.355	311.484	345.612	379.741	413.87	447.999	374.639
156	0	0	0	0	0	0	34.1358	76.0435	152.087	304.174	910	921.25	932.5	943.75	955	966.25	977.5	988.75	1000	1160.71	1188.57	1216.43	1244.29	1272.14	1300	1663.09	1713.29	1763.5	1977.04	2190.58	2404.12	2617.66	2831.2	3044.74	3258.28	3471.82	3685.36	3898.9	4589.11	5279.32	5969.53	6659.74	7349.95	8040.16	8730.37	9420.58	10110.8	10801	12540.8
158	0	0	0	0	0	0	0	0	0	0	0	0	0	0	0	0	0	0	0	0	0	0	1.58165	1.72553	1.83917	1.91593	1.7686	7.95761	10.0028	12.0481	14.0933	16.1385	18.1838	20.229	22.2742	24.3195	26.3647	28.4099	37.9992	47.5884	57.1777	66.7669	76.3562	85.9454	95.5347	105.124	114.713	124.302	155.136
162	0	0	0	0	0	0	0	0	0	0	0	0	0	0	0	0	0	0	0	0	0	0	0	0	0	0	0	0	0	0	0	0	0	0	0	0	0	0	0	0	0	0	0	0	0	0	0	0	0
166	0	0	0	0	0	0	0	0	0	0	0	0	0	0	0	0	0	0	0	0	0	0	0	0	0	0	0	0	0	0	0	0	0	0	0	0	0	0	0	0	0	0	0	0	0	0	0	0	0
170	0	0	0	0	0	0	0	0	0	0	0	0	0	0	0	0	0	1.95434	2.02829	2.16761	2.29106	2.50738	2.69508	2.84992	2.96616	6.54668	4.96457	3.8	4	4.2	4.4	4.6	4.8	5	5.2	5.4	5.6	5.8	6.22	6.64	7.06	7.48	7.9	8.32	8.74	9.16	9.58	10	46
174	0	0	0	0	0	0	0	0	0	0	0	0	0	0	0	0	0	0	0	0	0	0	0	0	0	0	0	0	0	0	0	0	0	0	0	0	0	0	0	0	0	0	0	0	0	0	0	0	0
175	0	0	0	0	0	0	0	0	0	0	0	0	0	0	0	0	0	0	0	0	0	0	0	0	0	0	0	0	0	0	0	0	0	0	0	0	0	0	0	0	0	0	0	0	0	0	0	0	0
178	0	0	0	0	0	0	0	0	0	0	0	0	0	0	0	0	0	0	0	0	0	0	0	0	0	0	0	0	0	0	0	0	0	0	0	0	0	0	0	0	0	0	0	0	0	0	0	0	0
180	0	0	0	0	0	0	0	0	0	0	0	0	0	0	0	0	0	0	0	0	0	0	0	0	0	0	0	0	0	0	0	0	0	0	0	0	0	0	0	0	0	0	0	0	0	0	0	0	0
184	0	0	0	0	0	0	0	0	0	0	0	0	0	0	0	0	0	0	0	0	0	0	0	0	0	0	0	0	0	0	0	0	0	0	0	0	0	0	0	0	0	0	0	0	0	0	0	0	0
188	0	0	0	0	0	0	0	0	0	0	0	0	0	0	0	0	0	0	0	0	0	0	0	0	0	0	0	0.195325	0.234459	0.273593	0.312727	0.351861	0.390995	0.430128	0.469262	0.508396	0.54753	0.586664	1.5384	2.49013	3.44186	4.3936	5.34533	6.29707	7.2488	8.20053	9.15227	10.104	12.7533
191	0	0	0	0	0	0	0	0	0	0	0	0	0	0	0	0	0	0	0	0	0	0	0	0	0	0	0	0.0940262	0.103674	0.113323	0.122971	0.132619	0.142267	0.151916	0.161564	0.171212	0.18086	0.190509	0.371458	0.552407	0.733356	0.914305	1.09525	1.2762	1.45715	1.6381	1.81905	2	1.66667
192	0	0	0	0	0	0	0	0	0	0	0	0	0	0	0	0	0	0	0	0	0	0	0	0	0	0	0	0.0970729	0.147039	0.197005	0.246972	0.296938	0.346904	0.39687	0.446837	0.496803	0.546769	0.596735	1.16063	1.72452	2.28841	2.8523	3.41619	3.98008	4.54397	5.10786	5.67175	6.23564	13.1641
196	0	0	0	0	0	0	0	0	0	0	0	0	0	0	0	0	0	0	0	0	0	0	0	0	0	0	0	1.15244	1.21043	1.26842	1.3264	1.38439	1.44238	1.50037	1.55836	1.61635	1.67434	1.73233	2.3245	2.91666	3.50883	4.10099	4.69316	5.28532	5.87749	6.46965	7.06182	7.65398	10.064
203	0	0	0	0	0	0	0	0	0	0	0	0	0	0	0	0	0	0	0	0	0	0	0	0	0	0	0	0.178208	0.17613	0.174052	0.171975	0.169897	0.167819	0.165742	0.163664	0.161586	0.159509	0.157431	0.308902	0.460373	0.611844	0.763314	0.914785	1.06626	1.21773	1.3692	1.52067	1.67214	1.39345
204	0	0	0	0	0	0	0	0	0	0	0	0	0	0	0	0	0	0	0	0	0	0	0	0	0	0	0	0	0	0	0	0	0	0	0	0	0	0	0	0	0	0	0	0	0	0	0	0	0
208	0	0	0	0	0	0	0	0	0	0	0	0	0	0	0	0	0	0	0	0	0	0	0	0	0	0	0	0.202444	0.217521	0.232599	0.247676	0.262754	0.277831	0.292909	0.307986	0.323063	0.338141	0.353218	0.77258	1.19194	1.6113	2.03066	2.45003	2.86939	3.28875	3.70811	4.12747	4.54683	6.82025
212	0	0	0	0	0	0	0	0	0	0	0	0	0	0	0	0	0	0	0	0	0	0	0	0	0	0	0	0	0	0	0	0	0	0	0	0	0	0	0	0	0	0	0	0	0	0	0	0	0
214	0	0	0	0	0	0	0	0	0	0	0	0	0	0	0	0	0	0	0	0	0	0	0	0	0	0	0	0.0371014	0.0410542	0.0450071	0.0489599	0.0529128	0.0568656	0.0608184	0.0647713	0.0687241	0.072677	0.0766298	0.165601	0.254572	0.343544	0.432515	0.521486	0.610458	0.699429	0.7884	0.877371	0.966343	18.5216
218	0	0	0	0	0	0	0	0	0	0	0	0	0	0	0	0	0	0	0	0	0	0	0	0	0	0	0	0.186021	0.185214	0.184406	0.183599	0.182791	0.181984	0.181176	0.180369	0.179561	0.178754	0.177946	0.189	0.200054	0.211107	0.222161	0.233215	0.244268	0.255322	0.266375	0.277429	0.288483	53.1289
222	0	0	0	0	0	0	0	0	0	0	0	0	0	0	0	0	0	0	0	0	0	0	0	0	0	0	0	0.0151965	0.0183941	0.0215916	0.0247892	0.0279868	0.0311844	0.034382	0.0375795	0.0407771	0.0439747	0.0471723	0.105743	0.164315	0.222886	0.281457	0.340028	0.398599	0.45717	0.515741	0.574312	0.632883	2.42605
226	0	0	0	0	0	0	0	0	0	0	0	0	0	0	0	0	0	0	0	0	0	0	0	0	0	0	0	0	0	0	0	0	0	0	0	0	0	0	0	0	0	0	0	0	0	0	0	0	0
231	0	0	0	0	0	0	0	0	0	0	0	0	0	0	0	0	0	1.87104	2.2871	2.28645	2.28579	2.28514	2.28448	2.28382	2.28316	2.28251	2.28185	2.28119	2.53853	2.79588	3.05322	3.31056	3.56791	3.82525	4.0826	4.33994	4.59728	4.85463	6.36916	7.8837	9.39824	10.9128	12.4273	13.9419	15.4564	16.9709	18.4855	20	39.9786
232	0	0	0	0	0	0	0	0	0	0	0	0	0	0	0	0	0	0	0	0	0	0	0	0	0	0	0	0.239053	0.276266	0.313479	0.350693	0.387906	0.425119	0.462333	0.499546	0.536759	0.573973	0.611186	0.643791	0.676397	0.709002	0.741607	0.774213	0.806818	0.839423	0.872029	0.904634	0.937239	1.8358
233	0	0	0	0	0	0	0	0	0	0	0	0	0	0	0	0	0	0	0	0	0	0	0	0	0	0	0	0	0	0	0	0	0	0	0	0	0	0	0	0	0	0	0	0	0	0	0	0	0.141232
234	0	0	0	0	0	0	0	0	0	0	0	0	0	0	0	0	0	0	0	0	0	0	0	0	0	0	0	0	0	0	0	0	0	0	0	0	0	0	0	0	0	0	0	0	0	0	0	0	0
238	0	0	0	0	0	0	0	0	0	0	0	0	0	0	0	0	0	0	0	0	0	0	0	0	0	0	0	0	0	0	0	0	0	0	0	0	0	0	0	0	0	0	0	0	0	0	0	0	0
242	0	0	0	0	0	0	0	0	0	0	0	0	0	0	0	0	0	0	0	0	0	0	0	0	0	0	0	0	0	0	0	0	0	0	0	0	0	0	0	0	0	0	0	0	0	0	0	0	0.166667
246	0	0	0	0	0	0	0	0	0	0	0	0	0	0	0	0	0	0	0	0	0	0	0	0	0	0	0	0	0	0	0	0	0	0	0	0	0	0	0	0	0	0	0	0	0	0	0	0	0
250	0	0	0	0	0	0	0	0	0	0	5.18507	5.9066	6.60355	5.77807	4.96702	4.65984	4.35586	4.53	4.69264	5.3017	5.87896	6.86149	9.07574	13.474	9.00082	11.8332	13.9654	15.7458	16.9294	18.113	19.2967	20.4803	21.6639	22.8475	24.0311	25.2148	26.3984	27.582	44.8238	62.0656	79.3074	96.5492	113.791	131.033	148.275	165.516	182.758	200	215.607
254	0	0	0	0	0	0	0	0	0	0	0	0	0	0	0	0	0	0	0	0	0	0	0	0	0	0	0	0	0	0	0	0	0	0	0	0	0	0	0	0	0	0	0	0	0	0	0	0	0.165655
258	0	0	0	0	0	0	0	0	0	0	0	0	0	0	0	0	0	0	0	0	0	0	0	0	0	0	0	0	0	0	0	0	0	0	0	0	0	0	0	0	0	0	0	0	0	0	0	0	0
262	0	0	0	0	0	0	0	0	0	0	0	0	0	0	0	0	0	0	0	0	0	0	0	0	0	0	0	0	0	0	0	0	0	0	0	0	0	0	0	0	0	0	0	0	0	0	0	0	0.0638999
266	0	0	0	0	0	0	0	0	0	0	0	0	0	0	0	0	0	0	0	0	0	0	0	0	0	0	0	0	0	0	0	0	0	0	0	0	0	0	0	0	0	0	0	0	0	0	0	0	0.666667
268	0	0	0	0	0	0	0	0	0	0	0.974795	1.02637	1.07964	1.13445	1.19061	1.24784	1.30577	1.36394	1.42171	1.4575	1.48551	2.14826	2.74907	3.2819	2.48396	2.91138	3.21831	3.37379	3.7052	4.03661	4.36802	4.69943	5.03084	5.36225	5.69366	6.02507	6.35648	6.68789	9.09764	11.5074	13.9171	16.3269	18.7366	21.1464	23.5561	25.9659	28.3756	30.7853	37.1691
270	0	0	0	0	0	0	0	0	0	0	0	0	0	0	0	0	0	0	0	0	0	0	0	0	0	0	0	1.06642	1.02697	0.987512	0.948058	0.908605	0.869151	0.829698	0.790244	0.75079	0.711337	0.671883	0.669841	0.6678	0.665758	0.663716	0.661674	0.659633	0.657591	0.655549	0.653508	0.651466	0.651466
275	0	0	0	0	0	0	0	0	0	0	0	0	0	0	0	0	0	0	0	0	0	0	0	0	0	0	0	0.0747822	0.0957715	0.116761	0.13775	0.15874	0.179729	0.200718	0.221708	0.242697	0.263686	0.284676	0.351406	0.418136	0.484867	0.551597	0.618327	0.685058	0.751788	0.818518	0.885249	0.951979	3.2136
276	0	0	0	0	0	0	0	0	0	0	0	0	0	0	0	0	0	0	0	0	1.36701	2.18722	3.55423	4.37444	2.32392	3.00743	3.28083	3.00743	3.44713	3.88684	4.32654	4.76624	5.20595	5.64565	6.08536	6.52506	6.96476	7.40447	15.664	23.9236	32.1831	40.4427	48.7022	56.9618	65.2213	73.4809	81.7404	90	99.3359
288	0	0	0	0	0	0	0	0	0	0	0	0	0	0	0	0	0	0	0	0	0	0	0	0	0	0	0	1.26289	1.31771	1.37252	1.42734	1.48215	1.53697	1.59178	1.6466	1.70142	1.75623	1.81105	1.81977	1.8285	1.83722	1.84595	1.85468	1.8634	1.87213	1.88085	1.88958	1.89831	2.53107
292	0	0	0	0	0	0	0	0	0	0	0	0	0	0	0	0	0	0	0	0	0	0	0	0	0	0	0	0	0	0	0	0	0	0	0	0	0	0	0	0	0	0	0	0	0	0	0	0	0
296	0	0	0	0	0	0	0	0	0	0	0	0	0	0	0	0	0	0	0	0	0	0	0	0	0	0	0	0	0	0	0	0	0	0	0	0	0	0	0	0	0	0	0	0	0	0	0	0	0
300	0	0	0	0	0	0	0	0	0	0	4.55491	4.55491	4.55491	3.98555	3.41618	2.61907	1.82196	1.93584	2.04971	2.16358	2.27746	2.45965	2.66462	2.84682	2.04971	2.27746	3.41618	3.41618	3.76011	4.10404	4.44797	4.7919	5.13582	5.47975	5.82368	6.16761	6.51153	6.85546	13.9782	21.101	28.2238	35.3465	42.4693	49.592	56.7148	63.8376	70.9603	78.0831	121.029
304	0	0	0	0	0	0	0	0	0	0	0	0	0	0	0	0	0	0	0	0	0	0	0	0	0	0	0	0	0	0	0	0	0	0	0	0	0	0	0	0	0	0	0	0	0	0	0	0	0
308	0	0	0	0	0	0	0	0	0	0	0	0	0	0	0	0	0	0	0	0	0	0	0	0	0	0	0	0	0	0	0	0	0	0	0	0	0	0	0	0	0	0	0	0	0	0	0	0	0
312	0	0	0	0	0	0	0	0	0	0	0	0	0	0	0	0	0	0	0	0	0	0	0	0	0	0	0	0	0	0	0	0	0	0	0	0	0	0	0	0	0	0	0	0	0	0	0	0	0.0900025
316	0	0	0	0	0	0	0	0	0	0	0	0	0	0	0	0	0	0	0	0	0	0	0	0	0	0	0	0	0	0	0	0	0	0	0	0	0	0	0	0	0	0	0	0	0	0	0	0	0
320	0	0	0	0	0	0	0	0	0	0	0	0	0	0	0	0	0	0	1.52414	2.22286	2.87422	2.96392	3.03287	3.07789	3.09471	3.07727	2.15469	2.30431	2.35127	2.39823	2.44519	2.49215	2.53911	2.58606	2.63302	2.67998	2.72694	2.7739	4.20871	5.64352	7.07833	8.51314	9.94795	11.3828	12.8176	14.2524	15.6872	17.122	19.6017
324	0	0	0	0	0	0	0	0	0	0	0	0	0	0	0	0	0	0	0	0	0	1.88039	2.1376	2.42978	2.76165	3.13855	3.56656	4.05254	4.1328	4.21305	4.29331	4.37357	4.45383	4.53409	4.61435	4.6946	4.77486	4.85512	4.86961	4.8841	4.89858	4.91307	4.92756	4.94205	4.95654	4.97102	4.98551	5	7.5
328	0	0	0	0	0	0	0	0	0	0	0	1.72814	2.12771	2.61779	3.21819	3.95284	4.85048	5.94548	7.27876	8.8987	10.8619	11.646	12.3571	13.9868	15.4615	16.7625	16.0793	16.9951	17.8836	18.7721	19.6606	20.5491	21.4375	22.326	23.2145	24.103	24.9915	25.88	26.125	26.37	26.615	26.86	27.105	27.35	27.595	27.84	28.085	28.33	38.6083
332	0	0	0	0	0	0	0	0	0	0	0	0	0	0	0	0	0	0	0	0	0	0	0	0	0	0	0	0.0401196	0.0874961	0.134873	0.182249	0.229626	0.277002	0.324379	0.371755	0.419132	0.466508	0.513885	0.963341	1.4128	1.86225	2.31171	2.76117	3.21062	3.66008	4.10954	4.55899	5.00845	8.34741
334	0	0	0	0	0	0	0	0	0	0	0	0	0	0	0	0	0	0	0	0	0	0	0	0	0	0	0	0	0	0	0	0	0	0	0	0	0	0	0	0	0	0	0	0	0	0	0	0	0
336	0	0	0	0	0	0	0	0	0	0	0	0	0	0	0	0	0	0	0	0	0	0	0	0	0	0	0	0	0	0	0	0	0	0	0	0	0	0	0	0	0	0	0	0	0	0	0	0	0
340	0	0	0	0	0	0	0	0	0	0	0	0	0	0	0	0	0	0	0	0	0	0	0	0	0	0	0	0.278649	0.304847	0.331046	0.357245	0.383444	0.409643	0.435842	0.462041	0.48824	0.514439	0.540638	1.13792	1.73519	2.33247	2.92975	3.52703	4.1243	4.72158	5.31886	5.91614	6.51341	11.6883
0	0	0	0	0	0	0	0	0	0	0	0	0	0	0	0	0	0	0	0	0	0	0	0	0	0	0	0	0	0	0	0	0	0	0	0	0	0	0	0	0	0	0	0	0	0	0	0	0	0
348	0	0	0	0	0	0	0	0	0	0	0	0	0	0	0	0	0	0	0	0	0	0	0	0	0	0	0	0.197959	0.242145	0.286331	0.330517	0.374703	0.41889	0.463076	0.507262	0.551448	0.595634	0.639821	1.29065	1.94148	2.59231	3.24314	3.89397	4.5448	5.19563	5.84646	6.49728	7.14811	13.8793
352	0	0	0	0	0	0	0	0	0	0	0	0	0	0	0	0	0	0	0	0	0	0	0	0	0	0	0	0	0	0	0	0	0	0	0	0	0	0	0	0	0	0	0	0	0	0	0	0	0
356	0	0	0	0	0	0	43.1229	77.2634	138.433	248.031	444.398	424.198	403.998	383.965	364.236	344.92	326.106	307.863	290.241	273.279	257.002	241.426	226.558	212.398	198.941	186.174	174.085	193.428	249.203	304.978	360.752	416.527	472.302	528.077	583.852	639.627	695.401	751.176	1859.45	2967.73	4076	5184.28	6292.56	7400.83	8509.11	9617.38	10725.7	11833.9	13921.9
360	0	0	0	0	0	0	0	0	0	0	0	1.88011	2.2571	2.69464	3.20155	3.78785	4.4649	5.24565	6.14477	7.17894	8.36707	10.3297	12.6252	15.3033	21.6796	27.7428	31.4768	36.082	43.1232	50.1644	57.2056	64.2468	71.288	78.3291	85.3703	92.4115	99.4527	106.494	195.845	285.195	374.546	463.896	553.247	642.598	731.948	821.299	910.649	1000	1483.33
364	0	0	0	0	1.35369	7.6624	40.2276	43.318	32.2963	31.7994	47.6992	48.638	49.4929	50.264	50.9511	51.5544	52.0738	46.2421	40.6368	41.5369	42.3363	43.4929	44.5237	30.2857	31.5052	32.5989	39.4902	36.082	41.8417	45.4516	49.0615	52.6713	56.2812	59.891	63.5009	67.1107	70.7206	74.3304	96.8974	119.464	142.031	164.598	187.165	209.732	232.299	254.866	277.433	300	1033.33
368	0	0	0	0.897369	1.52646	8.32615	74.9354	94.1408	94.4837	107.981	64.7888	66.3707	67.7947	66.0583	64.3218	59.7405	55.3171	94.0423	130.4	113.808	98.0052	82.9919	63.0373	44.2667	42.6881	41.1094	49.4135	25.8972	40.1346	42.3171	44.4995	46.682	48.8644	51.0469	53.2293	55.4118	57.5942	59.7767	82.7398	105.703	128.666	151.629	174.592	197.555	220.518	243.481	266.445	289.408	390.7
372	0	0	0	0	0	0	0	0	0	0	0	0	0	0	0	0	0	0	0	0	0	0	0	0	0	0	0	0	0	0	0	0	0	0	0	0	0	0	0	0	0	0	0	0	0	0	0	0	0
376	0	0	0	0	0	0	0	0	0	0	0	0	0	0	0	0	0	0	0	0	0	0	0	0	0	0	0	1.50251	1.76148	2.02046	2.27943	2.5384	2.79738	3.05635	3.31532	3.5743	3.83327	4.09224	4.92125	5.75025	6.57926	7.40827	8.23727	9.06628	9.89528	10.7243	11.5533	12.3823	29.0296
380	0	0	0	0	0	0	0	0	0	0	0	4.73405	67.7851	60.9823	54.5817	35.4262	17.4863	25.0034	31.9583	34.6071	38.4805	46.2414	58.1305	82.1479	50.928	55.1809	78.1865	76.5705	84.2051	91.8397	99.4743	107.109	114.743	122.378	130.013	137.647	145.282	152.916	267.688	382.46	497.232	612.004	726.776	841.548	956.319	1071.09	1185.86	1300.63	1650.63
384	0	0	0	0	0	0	0	0	0	0	0	0	0	0	0	0	0	0	0	0	0	0	0	0	0	0	0	0.144688	0.165443	0.186199	0.206954	0.227709	0.248465	0.26922	0.289976	0.310731	0.331486	0.352242	0.409018	0.465793	0.522569	0.579345	0.636121	0.692897	0.749673	0.806448	0.863224	0.92	1.38
388	0	0	0	0	0	0	0	0	0	0	0	0	0	0	0	0	0	0	0	0	0	0	0	0	0	0	0	0.153724	0.237976	0.322229	0.406482	0.490734	0.574987	0.659239	0.743492	0.827744	0.911997	0.99625	1.54462	2.093	2.64137	3.18975	3.73812	4.2865	4.83487	5.38325	5.93162	6.48	9.06667
392	0	0	0	0	0	0	0	0	0	0	0	9.4816	13.0469	20.1321	26.9288	39.5754	51.6296	72.7663	88.9366	110.882	110.882	114.578	92.6187	101.48	123.503	154.908	201.012	292.057	319.963	347.87	375.777	403.683	431.59	459.497	487.403	515.31	543.217	571.123	768.386	965.649	1162.91	1360.17	1557.44	1754.7	1951.96	2149.22	2346.49	2543.75	2578.04
398	0	0	0	0	0	0	0	0	0	0	0	0	0	0	0	0	0	0	1.49083	1.86354	2.32942	2.91178	3.63972	4.54965	5.68707	7.10883	8.88604	11.1076	15.3721	19.6367	23.9012	28.1658	32.4304	36.6949	40.9595	45.224	49.4886	53.7532	124.069	194.385	264.701	335.017	405.333	475.65	545.966	616.282	686.598	756.914	776.05
400	0	0	0	0	0	0	0	0	0	0	0	0	0	0	0	0	0	0	0	0	0	0	0	0	0	0	0	1.05019	1.11423	1.17826	1.24229	1.30632	1.37035	1.43438	1.49842	1.56245	1.62648	1.69051	2.43458	3.17865	3.92272	4.66679	5.41086	6.15493	6.899	7.64308	8.38715	9.13122	12.3271
404	0	0	0	0	0	0	0	0	0	0	0	0	0	0	0	0	0	0	0	0	0	0	0	0	0	0	0	0.905203	1.07056	1.23592	1.40127	1.56663	1.73199	1.89734	2.0627	2.22806	2.39342	2.55877	2.7729	2.98702	3.20114	3.41527	3.62939	3.84351	4.05764	4.27176	4.48589	4.70001	6.11001
408	0	0	0	0	0	0	0	0	0	0	0	1.80378	2.26669	2.84551	3.56807	4.46836	5.58766	6.97565	8.69154	9.50148	10.231	11.859	15.212	10.9205	12.1144	13.0467	15.1706	17.2881	21.5656	25.8431	30.1206	34.3981	38.6756	42.953	47.2305	51.508	55.7855	60.063	74.0878	88.1127	102.138	116.162	130.187	144.212	158.237	172.262	186.287	200.311	243.467
410	0	0	0	0	0	0	0	0	0	0	0	0	1.7515	2.3611	3.17901	4.27441	5.73829	7.68968	10.2831	11.227	12.0704	13.9647	17.8709	12.7902	14.1306	15.1305	17.4403	19.5813	25.5343	31.4874	37.4405	43.3935	49.3466	55.2996	61.2527	67.2058	73.1588	79.1119	99.5617	120.011	140.461	160.911	181.361	201.811	222.261	242.71	263.16	283.61	344.675
414	0	0	0	0	0	0	0	0	0	0	0	0	0	0	0	0	0	0	0	0	0	0	0	0	0	0	0	0.143687	0.152521	0.161354	0.170188	0.179021	0.187855	0.196689	0.205522	0.214356	0.223189	0.232023	0.265121	0.298218	0.331316	0.364414	0.397511	0.430609	0.463707	0.496805	0.529902	0.563	0.469167
417	0	0	0	0	0	0	0	0	0	0	0	11.2268	11.8695	12.5419	13.2444	13.9771	14.7397	15.5315	16.3516	16.7495	17.1087	18.0964	19.0098	19.8428	20.5882	21.2378	23.5473	25.6222	30.948	36.2737	41.5995	46.9253	52.2511	57.5768	62.9026	68.2284	73.5542	78.8799	104.371	129.862	155.352	180.843	206.334	231.825	257.315	282.806	308.297	333.788	360.462
418	0	0	0	0	0	0	0	0	0	0	0	0	0	0	0	0	0	0	0	0	0	0	0	0	0	0	0	0.249223	0.280177	0.311132	0.342086	0.37304	0.403995	0.434949	0.465904	0.496858	0.527813	0.558767	0.818767	1.07877	1.33877	1.59877	1.85877	2.11877	2.37877	2.63877	2.89877	3.15877	4.38718
422	0	0	0	0	0	0	0	0	0	0	5.19666	5.81622	6.50338	7.26394	6.342	5.52951	4.81361	4.18287	3.62718	3.31311	3.00552	3.05987	3.09253	3.09973	2.34615	2.3554	2.53688	1.95175	1.99733	2.0429	2.08847	2.13404	2.17961	2.22518	2.27075	2.31632	2.36189	2.40747	3.11855	3.82964	4.54072	5.25181	5.96289	6.67398	7.38506	8.09615	8.80723	9.51832	13.8448
426	0	0	0	0	0	0	0	0	0	0	0	0	0	0	0	0	0	0	0	0	0	0	0	0	0	0	0	0	0	0	0	0	0	0	0	0	0	0	0	0	0	0	0	0	0	0	0	0	0.04233
428	0	0	0	0	0	0	0	0	0	0	0	0	0	0	0	0	0	0	0	0	0	0	0	0	0	0	0	0	0	0	0	0	0	0	0	0	0	0	0	0	0	0	0	0	0	0	0	0	0.0259455
430	0	0	0	0	0	0	0	0	0	0	0	0	0	0	0	0	0	0	0	0	0	0	0	0	0	0	0	0	0	0	0	0	0	0	0	0	0	0	0	0	0	0	0	0	0	0	0	0	0
434	0	0	0	0	0	0	0	0	0	0	8.15209	9.27262	10.4157	9.47564	8.51303	9.03342	9.56284	10.1013	10.6488	10.9811	11.318	8.00158	4.61745	6.99384	9.41536	11.882	11.9948	12.1076	13.4086	14.7096	16.0105	17.3115	18.6125	19.9135	21.2145	22.5155	23.8165	25.1175	26.6057	28.094	29.5822	31.0705	32.5587	34.047	35.5352	37.0235	38.5117	40	46.8922
438	0	0	0	0	0	0	0	0	0	0	0	0	0	0	0	0	0	0	0	0	0	0	0	0	0	0	0	0	0	0	0	0	0	0	0	0	0	0	0	0	0	0	0	0	0	0	0	0	0
440	0	0	0	0	0	0	0	0	0	0	0	0	0	0	0	0	0	0	0	0	0	0	0	0	0	0	0	0	0	0	0	0	0	0	0	0	0	0	0	0	0	0	0	0	0	0	0	0	0.127141
442	0	0	0	0	0	0	0	0	0	0	0	0	0	0	0	0	0	0	0	0	0	0	0	0	0	0	0	0	0	0	0	0	0	0	0	0	0	0	0	0	0	0	0	0	0	0	0	0	0
446	0	0	0	0	0	0	0	0	0	0	0	0	0	0	0	0	0	0	0	0	0	0	0	0	0	0	0	0	0	0	0	0	0	0	0	0	0	0	0	0	0	0	0	0	0	0	0	0	0
450	0	0	0	0	0	0	0	0	0	0	0	0	0	0	0	0	0	0	0	0	0	0	0	0	0	1.79617	2.17702	2.55641	2.97589	3.39537	3.81486	4.23434	4.65382	5.0733	5.49279	5.91227	6.33175	6.75123	7.07095	7.39068	7.7104	8.03012	8.34984	8.66956	8.98928	9.30901	9.62873	9.94845	58.0326
454	0	0	0	0	0	0	0	0	0	0	0	0	0	0	0	0	0	0	0	0	0	0	0	0	0	0	0	0	0	0	0	0	0	0	0	0	0	0	0	0	0	0	0	0	0	0	0	0	0.159999
458	0	0	0	0	0	0	0	0	0	0	0	0	0	0	0	0	0	0	0	0	0	1.93003	2.2463	2.56256	2.87883	3.19509	3.99385	4.7926	5.55469	6.31679	7.07889	7.84099	8.60309	9.36519	10.1273	10.8894	11.6515	12.4136	21.1722	29.9309	38.6895	47.4482	56.2068	64.9654	73.7241	82.4827	91.2414	100	121.333
462	0	0	0	0	0	0	0	0	0	0	0	0	0	0	0	0	0	0	0	0	0	0	0	0	0	0	0	0	0	0	0	0	0	0	0	0	0	0	0	0	0	0	0	0	0	0	0	0	0
466	0	0	0	0	0	0	0	0	0	0	0	0	0	0	0	0	0	0	0	0	0	0	0	1.43764	1.58758	1.7086	1.98066	2.24891	2.58861	2.92831	3.26801	3.60771	3.94741	4.28711	4.62681	4.96651	5.3062	5.6459	5.83131	6.01672	6.20213	6.38754	6.57295	6.75836	6.94376	7.12917	7.31458	7.49999	13.75
470	0	0	0	0	0	0	0	0	0	0	0	0	0	0	0	0	0	0	0	0	0	0	0	0	0	0	0	0.00960547	0.0105711	0.0115368	0.0125024	0.0134681	0.0144337	0.0153994	0.016365	0.0173307	0.0182963	0.019262	0.0358575	0.052453	0.0690486	0.0856441	0.10224	0.118835	0.135431	0.152026	0.168622	0.185217	0.308696
474	0	0	0	0	0	0	0	0	0	0	0	0	0	0	0	0	0	0	0	0	0	0	0	0	0	0	0	0.0233649	0.036168	0.0489712	0.0617744	0.0745775	0.0873807	0.100184	0.112987	0.12579	0.138593	0.151397	0.222011	0.292625	0.363239	0.433852	0.504466	0.57508	0.645694	0.716308	0.786922	0.857536	0.857536
478	0	0	0	0	0	0	0	0	0	0	0	0	0	0	0	0	0	0	0	0	0	0	0	1.98916	2.15458	2.29936	2.66269	3.01998	3.46202	3.90407	4.34612	4.78817	5.23022	5.67226	6.11431	6.55636	6.99841	7.44045	7.69641	7.95236	8.20832	8.46427	8.72023	8.97618	9.23214	9.48809	9.74405	10	10.0247
480	0	0	0	0	0	0	0	0	0	0	0	0	0	0	0	0	0	0	0	0	0	0	0	0	0	0	0	0.00322297	0	0	0	0	0	0	0	0	0	0.0555183	0	0	0	0	0	0	0	0	0	0.261695	0
484	0	0	0	0	0	0	0	0	0	0	53.3806	57.4568	61.8442	66.5667	71.6498	77.1213	83.0106	89.3497	96.173	113.065	130.604	151.033	172.24	194.248	217.081	240.764	9.82673	40.1076	48.1506	56.1935	64.2364	72.2793	80.3223	88.3652	96.4081	104.451	112.494	120.537	186.383	252.229	318.075	383.922	449.768	515.614	581.46	647.306	713.153	778.999	1038.67
492	0	0	0	0	0	0	0	0	0	0	0	0	0	0	0	0	0	0	0	0	0	0	0	0	0	0	0	0	0	0	0	0	0	0	0	0	0	0	0	0	0	0	0	0	0	0	0	0	0
496	0	0	0	0	0	0	0	0	0	0	0	0	0	0	0	0	0	0	0	0	0	0	0	0	0	0	0	0.119012	0.14548	0.171949	0.198418	0.224886	0.251355	0.277823	0.304292	0.330761	0.357229	0.383698	0.569172	0.754645	0.940119	1.12559	1.31107	1.49654	1.68201	1.86749	2.05296	2.23843	2.48715
498	0	0	0	0	0	0	0	0	0	0	0	0	0	0	0	0	0	0	0	0	0	0	0	0	0	0	0	0.675741	0.840172	1.0046	1.16903	1.33346	1.49789	1.66232	1.82675	1.99119	2.15562	2.32005	4.67807	7.0361	9.39413	11.7522	14.1102	16.4682	18.8262	21.1843	23.5423	25.9003	37.3639
500	0	0	0	0	0	0	0	0	0	0	0	0	0	0	0	0	0	0	0	0	0	0	0	0	0	0	0	0	0	0	0	0	0	0	0	0	0	0	0	0	0	0	0	0	0	0	0	0	0
504	0	0	0	0	0	0	0	0	0	0	8.27881	8.62001	8.96911	9.32559	9.68884	10.0581	10.4325	10.811	11.1923	11.7891	12.3225	11.3051	10.3299	11.1104	9.56943	7.65768	11.0113	8.19465	9.86326	11.5319	13.2005	14.8691	16.5377	18.2063	19.8749	21.5435	23.2121	24.8807	29.71	34.5392	39.3685	44.1977	49.027	53.8562	58.6855	63.5147	68.344	73.1733	203.259
508	0	0	0	0	0	0	0	0	0	0	0	0	0	0	0	0	0	0	0	0	1.70283	2.4854	3.26012	4.02687	4.78554	5.536	6.8839	8.21689	9.30623	10.3956	11.4849	12.5743	13.6636	14.7529	15.8423	16.9316	18.021	19.1103	20.5993	22.0883	23.5772	25.0662	26.5552	28.0441	29.5331	31.0221	32.511	34	10.0621
512	0	0	0	0	0	0	0	0	0	0	0	0	0	0	0	0	0	0	0	0	0	0	0	0	0	0	0	0	0	0	0	0	0	0	0	0	0	0	2	4	6	8	10	12	14	16	18	20	20
516	0	0	0	0	0	0	0	0	0	0	0	0	0	0	0	0	0	0	0	0	0	0	0	0	0	0	0	0.0892285	0.120431	0.151634	0.182837	0.21404	0.245243	0.276445	0.307648	0.338851	0.370054	0.401257	0.461131	0.521005	0.58088	0.640754	0.700628	0.760503	0.820377	0.880251	0.940126	1	1.5
520	0	0	0	0	0	0	0	0	0	0	0	0	0	0	0	0	0	0	0	0	0	0	0	0	0	0	0	0	0	0	0	0	0	0	0	0	0	0	0	0	0	0	0	0	0	0	0	0	0
524	0	0	0	0	0	0	0	0	0	0	0	0	0	0	0	0	0	0	0	0	0	0	0	0	0	0	0	0.692326	0.875069	1.05781	1.24056	1.4233	1.60604	1.78879	1.97153	2.15427	2.33701	2.51976	3.73778	4.95581	6.17383	7.39185	8.60988	9.8279	11.0459	12.264	13.482	14.7	23.9167
528	0	0	0	0	0	0	0	0	0	0	0	0	0	0	0	0	0	0	0	0	0	0	0	0	0.424007	0.641112	0.858218	1.07532	1.10656	1.1378	1.16903	1.20027	1.2315	1.26274	1.29398	1.32521	1.35645	1.38768	2.69986	4.01203	5.3242	6.63637	7.94855	9.26072	10.5729	11.8851	13.1972	14.5094	24.1823
530	0	0	0	0	0	0	0	0	0	0	0	0	0	0	0	0	0	0	0	0	0	0	0	0	0	0	0	0	0	0	0	0	0	0	0	0	0	0	0	0	0	0	0	0	0	0	0	0	0
533	0	0	0	0	0	0	0	0	0	0	0	0	0	0	0	0	0	0	0	0	0	0	0	0	0	0	0	0	0	0	0	0	0	0	0	0	0	0	0	0	0	0	0	0	0	0	0	0	0
540	0	0	0	0	0	0	0	0	0	0	0	0	0	0	0	0	0	0	0	0	0	0	0	0	0	0	0	0	0	0	0	0	0	0	0	0	0	0	0	0	0	0	0	0	0	0	0	0	0.333333
548	0	0	0	0	0	0	0	0	0	0	0	0	0	0	0	0	0	0	0	0	0	0	0	0	0	0	0	0	0	0	0	0	0	0	0	0	0	0	0	0	0	0	0	0	0	0	0	0	0
554	0	0	0	0	0	0	0	0	0	0	0	0	0	0	0	0	0	0	0	0	0	0	0	0	0	0	0	0	0	0	0	0	0	0	0	0	0	0	3.20825	6.4165	9.62475	12.833	16.0412	19.2495	22.4577	25.666	28.8742	32.0825	37.2838
558	0	0	0	0	0	0	0	0	0	0	0	0	0	0	0	0	0	0	0	0	0	0	0	0	0	0	0	0.0676698	0.0794665	0.0912632	0.10306	0.114857	0.126653	0.13845	0.150247	0.162043	0.17384	0.185637	0.333709	0.481782	0.629855	0.777927	0.926	1.07407	1.22214	1.37022	1.51829	1.66636	3.88818
562	0	0	0	0	0	0	0	0	0	0	0	0	0	0	0	0	0	0	0	0	0	0	0	0	0	0	0	0.53864	0.617305	0.695971	0.774636	0.853302	0.931967	1.01063	1.0893	1.16796	1.24663	1.32529	1.37091	1.41653	1.46215	1.50777	1.55339	1.59901	1.64463	1.69025	1.73587	1.78149	3.8599
566	0	0	0	0	0	0	0	0	0	0	0	0	0	0	0	0	0	0	0	0	0	0	0	0	0	0	0	0.905871	0.995497	1.08512	1.17475	1.26437	1.354	1.44363	1.53325	1.62288	1.7125	1.80213	1.84589	1.88966	1.93343	1.97719	2.02096	2.06472	2.10849	2.15226	2.19602	2.23979	26.753
570	0	0	0	0	0	0	0	0	0	0	0	0	0	0	0	0	0	0	0	0	0	0	0	0	0	0	0	0	0	0	0	0	0	0	0	0	0	0	0	0	0	0	0	0	0	0	0	0	0
574	0	0	0	0	0	0	0	0	0	0	0	0	0	0	0	0	0	0	0	0	0	0	0	0	0	0	0	0	0	0	0	0	0	0	0	0	0	0	0	0	0	0	0	0	0	0	0	0	0
578	0	0	0	0	0	0	0	0	0	0	0	0	0	0	0	0	0	0	0	0	0	0	0	0	0	0	0	0	0	0	0	0	0	0	0	0	0	0	0	0	0	0	0	0	0	0	0	0	1.22705
580	0	0	0	0	0	0	0	0	0	0	0	0	0	0	0	0	0	0	0	0	0	0	0	0	0	0	0	0	0	0	0	0	0	0	0	0	0	0	0	0	0	0	0	0	0	0	0	0	0
583	0	0	0	0	0	0	0	0	0	0	0	0	0	0	0	0	0	0	0	0	0	0	0	0	0	0	0	0	0	0	0	0	0	0	0	0	0	0	0	0	0	0	0	0	0	0	0	0	0
584	0	0	0	0	0	0	0	0	0	0	0	0	0	0	0	0	0	0	0	0	0	0	0	0	0	0	0	0	0	0	0	0	0	0	0	0	0	0	0	0	0	0	0	0	0	0	0	0	0
585	0	0	0	0	0	0	0	0	0	0	0	0	0	0	0	0	0	0	0	0	0	0	0	0	0	0	0	0	0	0	0	0	0	0	0	0	0	0	0	0	0	0	0	0	0	0	0	0	0.5
586	0	0	0	0	0	0	102.719	155.635	235.811	357.29	541.348	528.321	513.188	502.422	489.372	474.543	458.365	461.633	460.519	469.297	472.674	446.445	421.079	382.799	394.119	381.16	450.462	504.013	570.345	636.676	703.008	769.339	835.671	902.002	968.334	1034.67	1101	1167.33	1438.1	1708.87	1979.64	2250.41	2521.19	2791.96	3062.73	3333.5	3604.27	3875.04	4662.43
591	0	0	0	0	0	0	0	0	0	0	0	0	0	0	0	0	0	0	0	0	0	0	0	0	0	0	0	0.264565	0.299347	0.334129	0.368911	0.403694	0.438476	0.473258	0.50804	0.542822	0.577604	0.612386	1.11908	1.62577	2.13247	2.63916	3.14585	3.65255	4.15924	4.66593	5.17263	5.67932	6.61191
598	0	0	0	0	0	0	0	0	0	0	0	0	0	0	0	0	0	0	0	0	0	0	0	0	0	0	0	0	0	0	0	0	0	0	0	0	0	0	0	0	0	0	0	0	0	0	0	0	0
600	0	0	0	0	0	0	0	0	0	0	0	0	0	0	0	0	0	0	0	0	0	0	0	0	0	0	0	0	0	0	0	0	0	0	0	0	0	0	0	0	0	0	0	0	0	0	0	0	5
604	0	0	0	0	0	0	0	0	0	34.89	36.5164	38.0606	39.6324	41.2252	42.8307	44.4387	46.0359	47.6058	49.1276	53.6489	57.6944	59.3521	60.5508	61.2132	61.2323	60.4517	18.1459	18.8652	18.7792	18.6932	18.6072	18.5212	18.4352	18.3491	18.2631	18.1771	18.0911	18.0051	27.4047	36.8042	46.2038	55.6034	65.003	74.4026	83.8021	93.2017	102.601	112.001	240.586
608	0	0	0	0	0	0	0	0	0	0	0	0	0	0	0	0	0	0	0	0	0	0	0	0	0	1.9327	3.09203	4.83092	6.78284	8.73477	10.6867	12.6386	14.5906	16.5425	18.4944	20.4463	22.3983	24.3502	59.7836	95.217	130.65	166.084	201.517	236.95	272.384	307.817	343.251	378.684	430.57
612	0	0	0	0	0	0	0	0	0	0	0	0	0	0	0	0	0	0	0	0	0	0	0	0	0	0	0	0	0	0	0	0	0	0	0	0	0	0	0	0	0	0	0	0	0	0	0	0	0
616	0	0	0	0	0	0	0	0	0	0	0	0	0	0	0	0	0	0	0	0	0	0	0	0	0	0	0	0.165675	0.185358	0.205042	0.224725	0.244408	0.264092	0.283775	0.303458	0.323142	0.342825	0.362508	0.797261	1.23201	1.66677	2.10152	2.53627	2.97102	3.40578	3.84053	4.27528	4.71003	19.6251
620	0	0	0	0	0	0	0	0	0	0	3.91698	4.27918	4.20358	4.12516	4.04365	3.56283	3.09595	3.02153	2.94325	3.57572	4.15922	5.02335	5.80133	7.71581	5.28549	7.28549	10.823	10.1785	11.3251	12.4717	13.6183	14.7649	15.9115	17.058	18.2046	19.3512	20.4978	21.6444	39.48	57.3155	75.1511	92.9866	110.822	128.658	146.493	164.329	182.164	200	233.629
624	0	0	0	0	0	0	0	0	0	0	0	0	0	0	0	0	0	0	0	0	0	0	0	0	0	0	0	1.33456	1.39229	1.45001	1.50774	1.56546	1.62319	1.68091	1.73864	1.79636	1.85408	1.91181	1.92063	1.92945	1.93827	1.94709	1.9559	1.96472	1.97354	1.98236	1.99118	2	4.5
626	0	0	0	0	0	0	0	0	0	0	0	0	0	0	0	0	0	0	0	0	0	0	0	0	0	0	0	0	0	0	0	0	0	0	0	0	0	0	0	0	0	0	0	0	0	0	0	0	0
630	0	0	0	0	0	0	0	0	0	0	0	0	0	0	0	0	0	0	0	0	0	0	0	0	0	0	0	0.0103226	0.0281727	0.0460229	0.0638731	0.0817233	0.0995735	0.117424	0.135274	0.153124	0.170974	0.188824	0.545185	0.901546	1.25791	1.61427	1.97063	2.32699	2.68335	3.03971	3.39607	3.75243	4.5484
634	0	0	0	0	0	0	0	0	0	0	0	0	0	0	0	0	0	0	0	0	0	0	0	0	0	0	0	0	0	0	0	0	0	0	0	0	0	0	0	0	0	0	0	0	0	0	0	0	0.0814586
638	0	0	0	0	0	0	0	0	0	0	0	0	0	0	0	0	0	0	0	0	0	0	0	0	0	0	0	0	0	0	0	0	0	0	0	0	0	0	0	0	0	0	0	0	0	0	0	0	0
642	0	0	0	0	0	0	0	0	0	0	0	0	0	0	0	0	0	0	0	0	0	0	0	0	0	0	0	0.0339061	0.0409454	0.0479846	0.0550239	0.0620631	0.0691024	0.0761417	0.0831809	0.0902202	0.0972594	0.104299	0.196713	0.289128	0.381543	0.473958	0.566373	0.658787	0.751202	0.843617	0.936032	1.02845	4.38804
643	0	0	0	0	0	0	0	0	0	0	0	0	0	0	0	0	0	0	0	0	0	0.585574	0.87836	0.909033	0.909033	1.17115	1.46393	1.65913	2.07741	2.4957	2.91399	3.33228	3.75056	4.16885	4.58714	5.00543	5.42372	5.842	8.73757	11.6331	14.5287	17.4243	20.3198	23.2154	26.111	29.0065	31.9021	34.7976	175.034
646	0	0	0	0	0	0	0	0	0	0	0	0	0	0	0	0	0	0	0	0	0	0	0	0	0	0	0	0	0	0	0	0	0	0	0	0	0	0	0	0	0	0	0	0	0	0	0	0	0.666667
654	0	0	0	0	0	0	0	0	0	0	0	0	0	0	0	0	0	0	0	0	0	0	0	0	0	0	0	0	0	0	0	0	0	0	0	0	0	0	0	0	0	0	0	0	0	0	0	0	0
659	0	0	0	0	0	0	0	0	0	0	0	0	0	0	0	0	0	0	0	0	0	0	0	0	0	0	0	0.0012346	0.00148765	0.0017407	0.00199375	0.0022468	0.00249985	0.0027529	0.00300595	0.003259	0.00351205	0.0037651	0.00518859	0.00661208	0.00803557	0.00945906	0.0108825	0.012306	0.0137295	0.015153	0.0165765	0.018	0.015
660	0	0	0	0	0	0	0	0	0	0	0	0	0	0	0	0	0	0	0	0	0	0	0	0	0	0	0	0	0	0	0	0	0	0	0	0	0	0	0	0	0	0	0	0	0	0	0	0	0
662	0	0	0	0	0	0	0	0	0	0	0	0	0	0	0	0	0	0	0	0	0	0	0	0	0	0	0	0	0	0	0	0	0	0	0	0	0	0	0	0	0	0	0	0	0	0	0	0	0.166667
666	0	0	0	0	0	0	0	0	0	0	0	0	0	0	0	0	0	0	0	0	0	0	0	0	0	0	0	0	0	0	0	0	0	0	0	0	0	0	0	0	0	0	0	0	0	0	0	0	0
670	0	0	0	0	0	0	0	0	0	0	0	0	0	0	0	0	0	0	0	0	0	0	0	0	0	0	0	0	0	0	0	0	0	0	0	0	0	0	0	0	0	0	0	0	0	0	0	0	0
674	0	0	0	0	0	0	0	0	0	0	0	0	0	0	0	0	0	0	0	0	0	0	0	0	0	0	0	0	0	0	0	0	0	0	0	0	0	0	0	0	0	0	0	0	0	0	0	0	0
678	0	0	0	0	0	0	0	0	0	0	0	0	0	0	0	0	0	0	0	0	0	0	0	0	0	0	0	0.214119	0.260177	0.306235	0.352293	0.398351	0.444409	0.490467	0.536525	0.582584	0.628642	0.6747	0.80723	0.93976	1.07229	1.20482	1.33735	1.46988	1.60241	1.73494	1.86747	2	3.33333
682	0	0	0	0	0	0	0	0	0	0	0	0	0	0	0	0	0	0	0	0	0	0	0	0	0	0	0	0.306056	0.434905	0.563755	0.692604	0.821453	0.950303	1.07915	1.208	1.33685	1.4657	1.59455	2.93509	4.27564	5.61618	6.95673	8.29727	9.63782	10.9784	12.3189	13.6595	15	69.6667
686	0	0	0	0	0	0	0	0	0	0	0	0	0	0	0	1.87818	2.35398	2.95024	3.69745	4.63383	5.80722	7.27759	9.12009	11.4288	14.3218	17.9467	22.4886	28.1795	28.7564	29.3333	29.9103	30.4872	31.0641	31.641	32.2179	32.7949	33.3718	33.9487	34.0538	34.159	34.2641	34.3692	34.4744	34.5795	34.6846	34.7897	34.8949	35	40.8333
690	0	0	0	0	0	0	0	0	0	0	0	0	0	0	0	0	0	0	0	0	0	0	0	0	0	0	0	0	0	0	0	0	0	0	0	0	0	0	0	0	0	0	0	0	0	0	0	0	0
694	0	0	0	0	0	0	0	0	0	0	0	0	0	0	0	0	0	0	0	0	0	0	0	0	0	0	0	0.114581	0.12745	0.14032	0.153189	0.166058	0.178927	0.191796	0.204665	0.217535	0.230404	0.243273	0.253006	0.262738	0.272471	0.282204	0.291936	0.301669	0.311402	0.321134	0.330867	0.340599	0.340599
702	0	0	0	0	0	0	0	0	0	0	0	0	0	0	0	0	0	0	0	0	0	0	0	0	0	0	0	0	0	0	0	0	0	0	0	0	0	0	0	0	0	0	0	0	0	0	0	0	0
703	0	0	0	0	0	0	0	0	0	0	0	0	0	0	0	0	0	0	0	0	0	0	0	0	0	0	0	0.00530491	0.00586848	0.00643204	0.0069956	0.00755917	0.00812273	0.00868629	0.00924986	0.00981342	0.010377	0.0109405	0.0187585	0.0265764	0.0343944	0.0422123	0.0500303	0.0578482	0.0656662	0.0734841	0.0813021	0.08912	0.0742667
704	0	0	0	0	0	0	0	0	0	0	0	0	0	0	0	0	0	0	0	0	1.91632	2.49009	3.06352	3.6367	4.20969	4.78255	5.97689	7.17094	9.74088	12.3108	14.8808	17.4507	20.0206	22.5906	25.1605	27.7304	30.3004	32.8703	59.5833	86.2963	113.009	139.722	166.435	193.148	219.861	246.574	273.287	300	416.667
705	0	0	0	0	0	0	0	0	0	0	0	0	0	0	0	0	0	0	0	0	0	0	0	0	0	0	0	0.0207543	0.0230041	0.0252539	0.0275037	0.0297535	0.0320033	0.0342531	0.0365029	0.0387528	0.0410026	0.0432524	0.0844491	0.125646	0.166843	0.208039	0.249236	0.290433	0.331629	0.372826	0.414023	0.45522	0.37935
706	0	0	0	0	0	0	0	0	0	0	0	0	0	0	0	0	0	0	0	0	0	0	0	0	0	0	0	0.52352	0.795748	1.06798	1.3402	1.61243	1.88466	2.15688	2.42911	2.70134	2.97357	3.24579	4.38371	5.52163	6.65956	7.79748	8.9354	10.0733	11.2112	12.3492	13.4871	14.625	17.0625
710	0	0	0	0	0	0	0	0	0	0	0	0	0	0	0	0	0	0	0	0	0	0	0	0	0	0	1.79865	5.13899	6.1441	7.14921	8.15433	9.15944	10.1646	11.1697	12.1748	13.1799	14.185	15.1901	54.0711	92.9521	131.833	170.714	209.595	248.476	287.357	326.238	365.119	404	471.333
716	0	0	0	0	0	0	0	0	0	0	0	0	0	0	0	0	0	0	0	0	0	0	0	0	0	0	0	0.558882	0.64729	0.735698	0.824107	0.912515	1.00092	1.08933	1.17774	1.26615	1.35456	1.44296	1.66867	1.89437	2.12008	2.34578	2.57148	2.79719	3.02289	3.24859	3.4743	3.7	5.70086
724	0	0	0	0	0	0	0	0	0	0	23.7957	25.2909	24.4995	23.6529	21.413	19.0711	20.0932	21.1322	22.187	23.2559	26.5495	32.9072	45.4748	33.7698	40.3814	53.3817	50.7357	57.7443	63.5044	69.2645	75.0245	80.7846	86.5447	92.3047	98.0648	103.825	109.585	115.345	196.542	277.738	358.935	440.132	521.329	602.525	683.722	764.919	846.116	927.312	1074.14
732	0	0	0	0	0	0	0	0	0	0	0	0	0	0	0	0	0	0	0	0	0	0	0	0	0	0	0	0	0	0	0	0	0	0	0	0	0	0	0	0	0	0	0	0	0	0	0	0	0
736	0	0	0	0	0	0	0	0	0	0	12.1731	12.613	13.0686	13.5404	14.0289	14.5347	15.0585	15.6008	16.1623	17.45	18.7438	19.4174	20.0938	21.8222	23.5586	25.303	27.2666	29.2392	34.8791	40.519	46.1589	51.7988	57.4387	63.0786	68.7185	74.3585	79.9984	85.6383	97.0745	108.511	119.947	131.383	142.819	154.255	165.691	177.128	188.564	200	272.589
740	0	0	0	0	0	0	0	0	0	0	0	0	0	0	0	0	0	0	0	0	0	0	0	0	0	0	0	0.0681632	0.0767247	0.0852863	0.0938478	0.102409	0.110971	0.119532	0.128094	0.136655	0.145217	0.153779	0.158401	0.163023	0.167645	0.172267	0.176889	0.181511	0.186134	0.190756	0.195378	0.2	0.166667
744	0	0	0	0	0	0	0	0	0	0	0	0	0	0	0	0	0	0	0	0	0	0	0	0	0	0	0	0	0	0	0	0	0	0	0	0	0	0	0	0	0	0	0	0	0	0	0	0	0
748	0	0	0	0	0	0	0	0	0	0	0	0	0	0	0	0	0	0	0	0	0	0	0	0	0	0	0	0	0	0	0	0	0	0	0	0	0	0	0	0	0	0	0	0	0	0	0	0	5.40004
752	0	0	0	0	0	0	0	0	0	0	0	0	0	0	0	0	0	0	0	0	0	0	0	0	0	0	0	0	0	0	0	0	0	0	0	0	0	0	0	0	0	0	0	0	0	0	0	0	0.92234
756	0	0	0	0	0	0	0	0	0	0	0	0	0	0	0	0	0	0	0	0	0	0	0	0	0	0	0	0.910586	0.987308	1.06403	1.14075	1.21747	1.2942	1.37092	1.44764	1.52436	1.60109	1.67781	3.16057	4.64334	6.1261	7.60887	9.09163	10.5744	12.0572	13.5399	15.0227	16.5055	16.5055
760	0	0	0	0	0	0.0046276	9.98321	11.2877	9.71037	11.6524	13.109	17.9277	24.5161	33.524	26.7394	21.3267	17.0087	13.5642	10.8167	19.8586	9.68251	10.295	10.9151	11.543	9.29524	10.0283	11.7852	11.9327	12.5246	13.1165	13.7085	14.3004	14.8923	15.4842	16.0761	16.668	17.2599	17.8518	22.1921	26.5324	30.8726	35.2129	39.5532	43.8935	48.2337	52.574	56.9143	61.2545	138.687
762	0	0	0	0	0	0	0	0	0	0	4.23534	4.46611	4.70568	4.95372	5.2097	5.47288	5.74223	6.01638	6.2935	6.43974	6.56019	6.65199	6.99122	7.27318	7.48942	7.62862	8.14004	8.47379	10.6517	12.8296	15.0075	17.1854	19.3633	21.5412	23.7191	25.897	28.0749	30.2528	40.464	50.6753	60.8866	71.0979	81.3091	91.5204	101.732	111.943	122.154	132.365	162.718
764	0	0	0	0	0	0	0	0	0	0	0	0	0	0	0	0	0	0	0	0	0	0	0	0	0	0	0	0.854343	1.08787	1.3214	1.55493	1.78846	2.02199	2.25552	2.48905	2.72258	2.95611	3.18964	6.81457	10.4395	14.0644	17.6893	21.3143	24.9392	28.5641	32.189	35.814	39.4389	245.967
768	0	0	0	0	0	0	0	0	0	0	0	0	0	0	0	0	0	0	0	0	0	0	0	0	0	0	0	0.441654	0.477534	0.513414	0.549295	0.585175	0.621055	0.656936	0.692816	0.728696	0.764577	0.800457	0.806411	0.812365	0.81832	0.824274	0.830228	0.836183	0.842137	0.848091	0.854046	0.86	0.86
772	0	0	0	0	0	0	0	0	0	0	0	0	0	0	0	0	0	0	0	0	0	0	0	0	0	0	0	0	0	0	0	0	0	0	0	0	0	0	0	0	0	0	0	0	0	0	0	0	0
776	0	0	0	0	0	0	0	0	0	0	0	0	0	0	0	0	0	0	0	0	0	0	0	0	0	0	0	0	0	0	0	0	0	0	0	0	0	0	0	0	0	0	0	0	0	0	0	0	0
780	0	0	0	0	0	0	0	0	0	0	0	0	0	0	0	0	0	0	0	0	0	0	0	0	0	0	0	0	0	0	0	0	0	0	0	0	0	0	0	0	0	0	0	0	0	0	0	0	0.283333
784	0	0	0	0	0	0	0	0	0	0	0	0	0	0	0	0	0	0	0	0	0	0	0	0	0	0	0	1.49815	1.51168	1.52522	1.53876	1.5523	1.56584	1.57938	1.59291	1.60645	1.61999	1.63353	1.98766	2.3418	2.69593	3.05006	3.4042	3.75833	4.11246	4.4666	4.82073	5.17487	9.05214
788	0	0	0	0	0	0	0	0	0	0	18.7833	20.9578	23.0937	21.7559	20.4374	19.1382	17.8582	17.7041	20.8405	21.201	21.5519	20.2912	21.1665	20.9737	16.6248	16.4706	20.3956	16.1623	17.879	19.5958	21.3126	23.0294	24.7461	26.4629	28.1797	29.8964	31.6132	33.33	39.1637	44.9974	50.8311	56.6649	62.4986	68.3323	74.166	79.9998	85.8335	91.6672	91.2222
792	0	0	0	0.551559	1.65468	10.4796	17.1715	23.3702	44.8996	63.9477	79.2738	85.0946	90.7581	83.4187	76.1728	69.0259	61.9843	67.2898	72.3709	78.6861	84.6691	60.755	70.1736	78.9648	61.9147	64.6254	79.5626	80.3993	86.6317	92.8641	99.0965	105.329	111.561	117.794	124.026	130.259	136.491	142.723	167.95	193.176	218.402	243.629	268.855	294.081	319.308	344.534	369.76	394.987	472.131
795	0	0	0	0	0	0	0	0	0	0	11.1176	11.8394	12.6067	13.4221	14.2885	15.209	16.1865	17.2246	18.3266	18.7651	19.1934	20.3958	21.5756	22.7323	24.0843	26.0598	30.1493	33.0938	38.4715	43.8493	49.227	54.6048	59.9825	65.3603	70.738	76.1158	81.4935	86.8713	109.155	131.439	153.723	176.007	198.291	220.575	242.858	265.142	287.426	309.71	406.476
796	0	0	0	0	0	0	0	0	0	0	0	0	0	0	0	0	0	0	0	0	0	0	0	0	0	0	0	0	0	0	0	0	0	0	0	0	0	0	0	0	0	0	0	0	0	0	0	0	0
798	0	0	0	0	0	0	0	0	0	0	0	0	0	0	0	0	0	0	0	0	0	0	0	0	0	0	0	0	0	0	0	0	0	0	0	0	0	0	0	0	0	0	0	0	0	0	0	0	0
800	0	0	0	0	0	0	0	0	0	0	0	0	0	0	0	0	0	0	0	0	0	0	0	0	0	0	0	0	0	0	0	0	0	0	0	0	0	0	0	0	0	0	0	0	0	0	0	0	0.214936
804	0	0	0	0	0	0	0	0	0	0	0	0	0	0	0	0	0	0	0	0	0	0	0	0	0	0	0	0.00580998	0.00669529	0.00758061	0.00846592	0.00935123	0.0102365	0.0111219	0.0120072	0.0128925	0.0137778	0.0146631	0.0352716	0.0558801	0.0764886	0.0970971	0.117706	0.138314	0.158923	0.179531	0.20014	0.220748	59.154
807	0	0	0	0	0	0	0	0	0	0	0	0	0	0	0	0	0	0	0	0	0	0	0	0	0	0	0	0	0	0	0	0	0	0	0	0	0	0	0	0	0	0	0	0	0	0	0	0	0
818	0	0	0	0	34.5664	155.117	700	800	850	900	1000	1060	1120	1180	1240	1300	1360	1420	1480	1540	1600	1660	1720	1780	1840	1900	2045.22	2190.43	2204.96	2219.48	2234	2248.52	2263.04	2277.57	2292.09	2306.61	2321.13	2335.65	2350.17	2364.7	2379.22	2393.74	2408.26	2422.78	2437.3	2451.83	2466.35	2480.87	2495.39
826	0	0	0	0	0	0	0	0	0	0	0	0	0	0	0	0	0	0	0	0	0	0	0	0	0	0	0	0	0	0	0	0	0	0	0	0	0	0	0	0	0	0	0	0	0	0	0	0	10.0726
834	0	0	0	0	0	0	0	0	0	0	0	0	0	0	0	0	0	0	0	0	0	0	0	0	0	0	0	0	0	0	0	0	0	0	0	0	0	0	0	0	0	0	0	0	0	0	0	0	3.33333
840	0	0	0	0	0	0	0	0	0	0	0	0	0	0	0	0	0	0	4.1434	4.67726	5.21395	5.65514	6.29808	6.86328	7.67456	8.43669	3.98899	5.057	6.21987	7.38274	8.54561	9.70849	10.8714	12.0342	13.1971	14.36	15.5228	16.6857	330.211	643.736	957.261	1270.79	1584.31	1897.84	2211.36	2524.89	2838.41	3151.94	5182.75
850	0	0	0	0	0	0	0	0	0	0	0	0	0	0	0	0	0	0	0	0	0	0	0	0	0	0	0	0	0	0	0	0	0	0	0	0	0	0	0	0	0	0	0	0	0	0	0	0	0
854	0	0	0	0	0	0	0	0	0	0	0	0	0	0	0	0	0	0	0	0	0	0	0	0	0	0	0	0.257762	0.278576	0.299389	0.320202	0.341016	0.361829	0.382642	0.403455	0.424269	0.445082	0.465895	0.469306	0.472716	0.476127	0.479537	0.482948	0.486358	0.489769	0.493179	0.49659	0.5	0.75
858	0	0	0	0	0	0	0	0	0	0	0	0	0	0	0	0	0	0	0	0	0	0	0	0	0	0	0	0	0	0	0	0	0	0	0	0	0	0	0	0	0	0	0	0	0	0	0	0	2.56103
860	0	0	0	0	0	0	0	0	0	0	28.5662	30.7079	33.0091	35.4816	38.1381	40.9923	44.0588	47.3532	50.8925	53.2011	55.5219	60.0203	64.5436	69.0915	73.6639	78.8865	90.4156	102.008	118.529	135.051	151.572	168.093	184.614	201.136	217.657	234.178	250.7	267.221	335.798	404.375	472.952	541.53	610.107	678.684	747.261	815.838	884.415	952.992	1091.07
862	0	0	0	0	0	0	0	0	0	0	0	0	0	0	0	0	0	0	0	0	0	0	0	0	0	0	0	0.139441	0.140545	0.141649	0.142753	0.143857	0.144961	0.146065	0.147169	0.148273	0.149377	0.15048	0.171407	0.192334	0.213261	0.234188	0.255115	0.276042	0.296968	0.317895	0.338822	0.359749	30.2789
876	0	0	0	0	0	0	0	0	0	0	0	0	0	0	0	0	0	0	0	0	0	0	0	0	0	0	0	0	0	0	0	0	0	0	0	0	0	0	0	0	0	0	0	0	0	0	0	0	0
882	0	0	0	0	0	0	0	0	0	0	0	0	0	0	0	0	0	0	0	0	0	0	0	0	0	0	0	0	0	0	0	0	0	0	0	0	0	0	0	0	0	0	0	0	0	0	0	0	0
887	0	0	0	0	0	0	0	0	0	0	0	0	0	0	0	0	0	0	0	0	0	0	0	0	0	0	0	17.7702	19.0806	20.391	21.7014	23.0117	24.3221	25.6325	26.9429	28.2533	29.5636	30.874	35.9997	41.1253	46.251	51.3767	56.5024	61.628	66.7537	71.8794	77.0051	82.1307	96.7774
891	0	0	0	0	0	0	0	0	0	0	0	0	0	0	0	0	0	0	0	0	0	0	0	0	0	0	0	0	0	0	0	0	0	0	0	0	0	0	0	0	0	0	0	0	0	0	0	0	0
894	0	0	0	0	0	0	0	0	0	0	0	0	0	0	0	0	0	0	0	0	0	0	0	0	0	0	0	0	0	0	0	0	0	0	0	0	0	0	0	0	0	0	0	0	0	0	0	0	0.333333
[truncated: 29 more columns]

## Sheet: lower2grid
ISO1	y-10000	y-9000	y-8000	y-7000	y-6000	y-5000	y-4000	y-3000	y-2000	y-1000	y0	y100	y200	y300	y400	y500	y600	y700	y800	y900	y1000	y1100	y1200	y1300	y1400	y1500	y1600	y1700	y1710	y1720	y1730	y1740	y1750	y1760	y1770	y1780	y1790	y1800	y1810	y1820	y1830	y1840	y1850	y1860	y1870	y1880	y1890	y1900	y1910
4	0	0	0	0	0	0	0	0	0	0	1.9629	2.4381	2.95645	3.19563	3.42618	3.64771	3.85978	3.94004	3.99831	4.07933	4.14253	4.52105	4.90176	3.52103	3.85701	4.1906	5.31508	5.37114	8.56519	11.8414	15.1998	18.6404	22.1631	25.768	29.455	33.2243	37.0757	41.0093	89.1655	138.43	188.804	240.286	292.877	346.577	401.385	457.303	514.328	572.463	683.915
8	0	0	0	0	0	0	0	0	0	0	0	0	0	0	0	0	0	0	0	0	0	0	0	0	0	0	0	0.331197	0.366099	0.401803	0.43831	0.475619	0.51373	0.552643	0.592359	0.632877	0.674197	0.716319	1.35231	2.00289	2.66806	3.34783	4.0422	4.75116	5.47471	6.21286	6.9656	7.73294	14.548
12	0	0	0	0	0	0	0	0	0	0	9.80032	10.4843	11.0855	11.608	12.0556	12.4323	12.7416	12.9871	13.172	14.7699	16.3848	16.3299	16.206	14.5886	12.8765	13.2517	19.9858	15.5819	19.0106	22.5241	26.1224	29.8054	33.5732	37.4257	41.363	45.3851	49.4919	53.6835	64.5596	75.674	87.0267	98.6175	110.447	122.514	134.82	147.364	160.146	173.166	173.916
16	0	0	0	0	0	0	0	0	0	0	0	0	0	0	0	0	0	0	0	0	0	0	0	0	0	0	0	0	0	0	0	0	0	0	0	0	0	0	0	0	0	0	0	0	0	0	0	0	0
20	0	0	0	0	0	0	0	0	0	0	0	0	0	0	0	0	0	0	0	0	0	0	0	0	0	0	0	0	0	0	0	0	0	0	0	0	0	0	0	0	0	0	0	0	0	0	0	0	0
24	0	0	0	0	0	0	0	0	0	0	0	0	0	0	0	0	0	0	0	0	0	0	0	0	0.549774	0.657184	0.729017	0.804556	1.14481	1.49374	1.85133	2.2176	2.59255	2.97616	3.36844	3.7694	4.17903	4.59733	5.59721	6.61909	7.66296	8.72883	9.81669	10.9266	12.0584	13.2123	14.3881	15.5859	18.2602
28	0	0	0	0	0	0	0	0	0	0	0	0	0	0	0	0	0	0	0	0	0	0	0	0	0	0	0	0	0	0	0	0	0	0	0	0	0	0	0	0	0	0	0	0	0	0	0	0	0
31	0	0	0	0	0	0	0	0	0	0	2.39757	2.88053	3.42232	4.029	4.70722	5.46424	6.30802	7.24724	8.29141	9.32263	10.4173	16.5202	23.2255	30.538	25.6415	33.5736	42.1236	51.2959	57.3143	63.473	69.7721	76.2116	82.7914	89.5117	96.3723	103.373	110.515	117.796	162.4	208.009	254.622	302.241	350.865	400.494	451.128	502.767	555.411	609.061	594.094
32	0	0	0	0	0	0	0	0	0	0	0	0	0	0	0	0	0	0	0	1.02595	1.23951	1.49316	1.79397	2.15027	2.57175	3.06977	3.6576	4.35073	8.3343	12.4212	16.6113	20.9048	25.3016	29.8017	34.4051	39.1118	43.9218	48.8351	108.969	170.487	233.391	297.68	363.354	430.413	498.857	568.686	639.901	712.5	715.225
36	0	0	0	0	0	0	0	0	0	0	0	0	0	0	0	0	0	0	0	0	0	0	0	0	0	0	0	0	0	0	0	0	0	0	0	0	0	0	1.8835	2.54452	3.22023	3.91063	4.61573	5.33551	6.06999	6.81917	7.58303	36.2535	130.4
40	0	0	0	0	0	0	0	0	0	0	0	0	0	0	0	0	0	0	0	0	0	0	0	0	0	0	0	0.196564	0.247558	0.299826	0.353366	0.408179	0.464265	0.521625	0.580257	0.640162	0.70134	0.763791	0	0	0	0	0	0	0	0	0	6.61578	0.119062
44	0	0	0	0	0	0	0	0	0	0	0	0	0	0	0	0	0	0	0	0	0	0	0	0	0	0	0	0	0	0	0	0	0	0	0	0	0	0	0	0	0	0	0	0	0	0	0	0	0
48	0	0	0	0	0	0	0	0	0	0	0	0	0	0	0	0	0	0	0	0	0	0	0	0	0	0	0	0.112073	0.130327	0.149022	0.168158	0.187736	0.207754	0.228213	0.249114	0.270455	0.292238	0.314462	0.412765	0.513269	0.615972	0.720876	0.82798	0.937284	1.04879	1.16249	1.2784	1.3965	1.32765
50	0	0	0	0	0	0	0	0	0	0	0	0	0	0	0	0	0	0	0	0	0	0	0	0	0	0	0	0	0	0	0	0	0	0	0	0	0	0	0	0	0	0	0	0	0	0	0	0	67.734
51	0	0	0	0	0	0	0	0	0	0	0	0	0	0	0	0	0	0	0	0	0	0	0	0	0	0	0	0.27482	0.344676	0.416274	0.489614	0.564696	0.641519	0.720085	0.800392	0.882441	0.966233	1.05177	2.14501	3.26339	4.40691	5.57556	6.76935	7.98828	9.23234	10.5015	11.7959	13.1154	24.4658
52	0	0	0	0	0	0	0	0	0	0	0	0	0	0	0	0	0	0	0	0	0	0	0	0	0	0	0	0	0	0	0	0	0	0	0	0	0	0	0	0	0	0	0	0	0	0	0	0	0.159
56	0	0	0	0	0	0	0	0	0	0	0	0	0	0	0	0	0	0	0	0	0	0	0	0	0	0	0	0.0608172	0.0719413	0.0833367	0.0950035	0.106942	0.119151	0.131632	0.144385	0.157409	0.170704	0.18427	0.349611	0.518746	0.691675	0.8684	1.04892	1.23323	1.42134	1.61324	1.80894	2.00843	1.68074
60	0	0	0	0	0	0	0	0	0	0	0	0	0	0	0	0	0	0	0	0	0	0	0	0	0	0	0	0	0	0	0	0	0	0	0	0	0	0	0	0	0	0	0	0	0	0	0	0	0
64	0	0	0	0	0	0	0	0	0	0	0	0	0	0	0	0	0	0	0	0	0	0	0	0	0	0	1.34335	1.58884	1.58143	1.57328	1.56437	1.55471	1.5443	1.53314	1.52122	1.50855	1.49513	1.48096	2.03654	2.60464	3.18526	3.77839	4.38404	5.0022	5.63288	6.27607	6.93178	7.6	7.632
68	0	0	0	0	0	0	0	0	0	0	0	0	0	0	0	0	0	0	0	0	0	0	0	0	0	0	0	0.420586	0.487182	0.555384	0.625191	0.696603	0.769619	0.844241	0.920467	0.998299	1.07774	1.15878	1.31317	1.47083	1.63177	1.79598	1.96347	2.13423	2.30826	2.48557	2.66615	2.85	13.833
70	0	0	0	0	0	0	0	0	0	0	0	0	0	0	0	0	0	0	0	0	0	0	0	0	0	0	0	0.0678831	0.0763413	0.0849982	0.0938539	0.102908	0.112162	0.121614	0.131264	0.141114	0.151162	0.161409	0.318977	0.480166	0.644974	0.813403	0.985452	1.16112	1.34041	1.52332	1.70985	1.9	1.59
72	0	0	0	0	0	0	0	0	0	0	0	0	0	0	0	0	0	0	0	0	0	0	0	0	0	0	0	0	0	0	0	0	0	0	0	0	0	0	0	0	0	0	0	0	0	0	0	0	0.0685059
76	0	0	0	0	0	0	0	0	0	0	0	0	0	0	0	0	0	0	0	0	0	0	0	0	0	0	0	0.012	0.015884	0.019866	0.023946	0.028124	0.0324	0.036774	0.041246	0.045816	0.050484	0.05525	0.08471	0.11484	0.14564	0.17711	0.20925	0.24206	0.27554	0.30969	0.34451	0.38	78.228
84	0	0	0	0	0	0	0	0	0	0	0	0	0	0	0	0	0	0	0	0	0	0	0	0	0	0	0	0	0	0	0	0	0	0	0	0	0	0	0	0	0	0	0	0	0	0	0	0	0
86	0	0	0	0	0	0	0	0	0	0	0	0	0	0	0	0	0	0	0	0	0	0	0	0	0	0	0	0	0	0	0	0	0	0	0	0	0	0	0	0	0	0	0	0	0	0	0	0	0
90	0	0	0	0	0	0	0	0	0	0	0	0	0	0	0	0	0	0	0	0	0	0	0	0	0	0	0	0	0	0	0	0	0	0	0	0	0	0	0	0	0	0	0	0	0	0	0	0	0
92	0	0	0	0	0	0	0	0	0	0	0	0	0	0	0	0	0	0	0	0	0	0	0	0	0	0	0	0	0	0	0	0	0	0	0	0	0	0	0	0	0	0	0	0	0	0	0	0	0
96	0	0	0	0	0	0	0	0	0	0	0	0	0	0	0	0	0	0	0	0	0	0	0	0	0	0	0	0	0	0	0	0	0	0	0	0	0	0	0	0	0	0	0	0	0	0	0	0	0
100	0	0	0	0	0	0	0	0	0	0	0	0	0	0	0	0	0	0	0	0	0	0	0	0	0	0	0	1.25717	1.42328	1.59333	1.76731	1.94522	2.12705	2.31282	2.50252	2.69615	2.89371	3.0952	5.39845	7.75442	10.1631	12.6245	15.1386	17.7055	20.325	22.9973	25.7223	28.5	38.2438
104	0	0	0	0	0	0	0	0	0	0.293834	0.632814	0.777931	0.937923	1.11279	1.30254	1.50716	1.72666	1.96104	2.2103	2.47443	2.75345	3.6278	4.57654	4.63974	5.77635	6.99481	8.20395	9.4875	11.0542	12.6588	14.3013	15.9817	17.7	19.4562	21.2503	23.0823	24.9522	26.86	46.7754	67.1466	87.9736	109.256	130.995	153.189	175.84	198.946	222.507	246.525	291.526
108	0	0	0	0	0	0	0	0	0	0	0	0	0	0	0	0	0	0	0	0	0	0	0	0	0	0	0	0	0	0	0	0	0	0	0	0	0	0	0	0	0	0	0	0	0	0	0	0	2.226
112	0	0	0	0	0	0	0	0	0	0	0	0	0	0	0	0	0	0	0	0	0	0	0	0	0	0	0	0.0969515	0.121595	0.146854	0.172727	0.199214	0.226316	0.254033	0.282364	0.311309	0.340869	0.371044	0.756721	1.15127	1.55468	1.96696	2.38811	2.81812	3.25701	3.70476	4.16137	4.62686	6.82928
116	0	0	0	0	0	0	0	0	0	0	0	0	0	0	0	0	0	0	0	0	0	0	0	0	0	0	0	0.443151	0.562019	0.683859	0.808672	0.936458	1.06722	1.20095	1.33765	1.47733	1.61997	1.7656	2.68798	3.63133	4.59565	5.58094	6.58719	7.61442	8.66261	9.73176	10.8219	11.933	18.8308
120	0	0	0	0	0	0	0	0	0	0	0	0	0	0	0	0	0	0	0	0	0	0	0	0	0	0	0	0	0	0	0	0	0	0	0	0	0	0	0	0	0	0	0	0	0	0	0	0	0.318
124	0	0	0	0	0	0	0	0	0	0	0	0	0	0	0	0	0	0	0	0	0	0	0	0	0	0	0	0	0	0	0	0	0	0	0	0	0	0	2.7864	5.6376	8.5536	11.5344	14.58	17.6904	20.8656	24.1056	27.4104	30.78	64.3885
132	0	0	0	0	0	0	0	0	0	0	0	0	0	0	0	0	0	0	0	0	0	0	0	0	0	0	0	0	0	0	0	0	0	0	0	0	0	0	0	0	0	0	0	0	0	0	0	0	0.208301
136	0	0	0	0	0	0	0	0	0	0	0	0	0	0	0	0	0	0	0	0	0	0	0	0	0	0	0	0	0	0	0	0	0	0	0	0	0	0	0	0	0	0	0	0	0	0	0	0	0
140	0	0	0	0	0	0	0	0	0	0	0	0	0	0	0	0	0	0	0	0	0	0	0	0	0	0	0	0	0	0	0	0	0	0	0	0	0	0	0	0	0	0	0	0	0	0	0	0	0
144	0	0	0	0	0	0	0	0	0	0	0.159992	0.205571	0.255704	0.310021	0.368128	0.429593	0.49395	0.560686	0.629235	0.698964	0.769164	0.88838	1.00846	0.994332	0.96382	1.04154	1.29948	1.54371	1.66089	1.78062	1.90288	2.02769	2.15504	2.28493	2.41736	2.55234	2.68986	2.82992	9.198	15.7134	22.3761	29.1862	36.1435	43.2482	50.5002	57.8996	65.4462	73.1402	102.215
148	0	0	0	0	0	0	0	0	0	0	0	0	0	0	0	0	0	0	0	0	0	0	0	0	0	0	0	0.185888	0.220736	0.256435	0.292986	0.330389	0.368644	0.407751	0.447709	0.488519	0.530181	0.572695	0.595919	0.619526	0.643517	0.66789	0.692648	0.717788	0.743312	0.76922	0.795511	0.822185	1.65129
152	0	0	0	0	0	0	0	0	0	0	6.19559	7.30939	8.52111	9.83497	11.2546	12.7829	14.4213	16.1699	18.0265	19.9665	21.8983	24.633	27.3251	29.9184	32.3436	34.5122	34.0375	33.2535	38.4373	43.7458	49.179	54.737	60.4197	66.2272	72.1594	78.2164	84.3981	90.7046	121.122	152.223	184.006	216.471	249.62	283.45	317.963	353.159	389.038	425.599	357.406
156	0	0	0	0	0	0	5.12038	13.3076	30.4174	68.4392	227.5	257.408	287.978	319.21	351.103	383.658	416.875	450.754	485.294	597.426	646.723	697.658	750.231	804.443	860.294	1149.49	1234.58	1322.62	1502.55	1686.75	1875.21	2067.95	2264.96	2466.24	2671.79	2881.61	3095.7	3314.07	3946.63	4593.01	5253.19	5927.17	6614.96	7316.55	8031.94	8761.14	9504.14	10260.9	11963.9
158	0	0	0	0	0	0	0	0	0	0	0	0	0	0	0	0	0	0	0	0	0	0	0.95364	1.09115	1.2171	1.32424	1.27443	5.96821	7.60216	9.27702	10.9928	12.7494	14.547	16.3855	18.2649	20.1852	22.1463	24.1484	32.6793	41.4019	50.3164	59.4226	68.7206	78.2104	87.8919	97.7653	107.83	118.087	147.999
162	0	0	0	0	0	0	0	0	0	0	0	0	0	0	0	0	0	0	0	0	0	0	0	0	0	0	0	0	0	0	0	0	0	0	0	0	0	0	0	0	0	0	0	0	0	0	0	0	0
166	0	0	0	0	0	0	0	0	0	0	0	0	0	0	0	0	0	0	0	0	0	0	0	0	0	0	0	0	0	0	0	0	0	0	0	0	0	0	0	0	0	0	0	0	0	0	0	0	0
170	0	0	0	0	0	0	0	0	0	0	0	0	0	0	0	0	0	0.89095	0.984317	1.11568	1.2466	1.43805	1.62498	1.80216	1.9629	4.52491	3.57741	2.85	3.04	3.234	3.432	3.634	3.84	4.05	4.264	4.482	4.704	4.93	5.3492	5.7768	6.2128	6.6572	7.11	7.5712	8.0408	8.5188	9.0052	9.5	43.884
174	0	0	0	0	0	0	0	0	0	0	0	0	0	0	0	0	0	0	0	0	0	0	0	0	0	0	0	0	0	0	0	0	0	0	0	0	0	0	0	0	0	0	0	0	0	0	0	0	0
175	0	0	0	0	0	0	0	0	0	0	0	0	0	0	0	0	0	0	0	0	0	0	0	0	0	0	0	0	0	0	0	0	0	0	0	0	0	0	0	0	0	0	0	0	0	0	0	0	0
178	0	0	0	0	0	0	0	0	0	0	0	0	0	0	0	0	0	0	0	0	0	0	0	0	0	0	0	0	0	0	0	0	0	0	0	0	0	0	0	0	0	0	0	0	0	0	0	0	0
180	0	0	0	0	0	0	0	0	0	0	0	0	0	0	0	0	0	0	0	0	0	0	0	0	0	0	0	0	0	0	0	0	0	0	0	0	0	0	0	0	0	0	0	0	0	0	0	0	0
184	0	0	0	0	0	0	0	0	0	0	0	0	0	0	0	0	0	0	0	0	0	0	0	0	0	0	0	0	0	0	0	0	0	0	0	0	0	0	0	0	0	0	0	0	0	0	0	0	0
188	0	0	0	0	0	0	0	0	0	0	0	0	0	0	0	0	0	0	0	0	0	0	0	0	0	0	0	0.146494	0.178189	0.210666	0.243927	0.27797	0.312796	0.348404	0.384795	0.421969	0.459925	0.498665	1.32302	2.16641	3.02884	3.9103	4.8108	5.73033	6.6689	7.6265	8.60313	9.5988	12.1667
191	0	0	0	0	0	0	0	0	0	0	0	0	0	0	0	0	0	0	0	0	0	0	0	0	0	0	0	0.0705197	0.0787926	0.0872585	0.0959173	0.104769	0.113814	0.123052	0.132482	0.142106	0.151923	0.161932	0.319454	0.480594	0.645353	0.813732	0.985729	1.16135	1.34058	1.52343	1.70991	1.9	1.59
192	0	0	0	0	0	0	0	0	0	0	0	0	0	0	0	0	0	0	0	0	0	0	0	0	0	0	0	0.0728047	0.11175	0.151694	0.192638	0.234581	0.277523	0.321465	0.366406	0.412346	0.459286	0.507225	0.998139	1.50033	2.0138	2.53855	3.07457	3.62187	4.18045	4.75031	5.33145	5.92386	12.5586
196	0	0	0	0	0	0	0	0	0	0	0	0	0	0	0	0	0	0	0	0	0	0	0	0	0	0	0	0.864327	0.919924	0.97668	1.0346	1.09367	1.15391	1.2153	1.27786	1.34157	1.40645	1.47248	1.99907	2.5375	3.08777	3.64988	4.22384	4.80964	5.40729	6.01678	6.63811	7.27128	9.60108
203	0	0	0	0	0	0	0	0	0	0	0	0	0	0	0	0	0	0	0	0	0	0	0	0	0	0	0	0.133656	0.133859	0.13402	0.13414	0.134219	0.134255	0.134251	0.134205	0.134117	0.133987	0.133816	0.265656	0.400524	0.538422	0.67935	0.823307	0.970293	1.12031	1.27335	1.42943	1.58853	1.32935
204	0	0	0	0	0	0	0	0	0	0	0	0	0	0	0	0	0	0	0	0	0	0	0	0	0	0	0	0	0	0	0	0	0	0	0	0	0	0	0	0	0	0	0	0	0	0	0	0	0
208	0	0	0	0	0	0	0	0	0	0	0	0	0	0	0	0	0	0	0	0	0	0	0	0	0	0	0	0.151833	0.165316	0.179101	0.193187	0.207575	0.222265	0.237256	0.252548	0.268143	0.284038	0.300235	0.664418	1.03699	1.41795	1.80729	2.20502	2.61114	3.02565	3.44854	3.87982	4.31949	6.50652
212	0	0	0	0	0	0	0	0	0	0	0	0	0	0	0	0	0	0	0	0	0	0	0	0	0	0	0	0	0	0	0	0	0	0	0	0	0	0	0	0	0	0	0	0	0	0	0	0	0
214	0	0	0	0	0	0	0	0	0	0	0	0	0	0	0	0	0	0	0	0	0	0	0	0	0	0	0	0.027826	0.0312012	0.0346554	0.0381887	0.0418011	0.0454925	0.0492629	0.0531125	0.057041	0.0610487	0.0651353	0.142417	0.221478	0.302318	0.384938	0.469338	0.555516	0.643475	0.733212	0.824729	0.918026	17.6696
218	0	0	0	0	0	0	0	0	0	0	0	0	0	0	0	0	0	0	0	0	0	0	0	0	0	0	0	0.139516	0.140762	0.141993	0.143207	0.144405	0.145587	0.146753	0.147902	0.149036	0.150153	0.151254	0.16254	0.174047	0.185774	0.197723	0.209893	0.222284	0.234896	0.247729	0.260783	0.274059	50.685
222	0	0	0	0	0	0	0	0	0	0	0	0	0	0	0	0	0	0	0	0	0	0	0	0	0	0	0	0.0113974	0.0139795	0.0166256	0.0193356	0.0221096	0.0249475	0.0278494	0.0308152	0.033845	0.0369387	0.0400964	0.0909393	0.142954	0.196139	0.250496	0.306025	0.362725	0.420596	0.479639	0.539854	0.601239	2.31445
226	0	0	0	0	0	0	0	0	0	0	0	0	0	0	0	0	0	0	0	0	0	0	0	0	0	0	0	0	0	0	0	0	0	0	0	0	0	0	0	0	0	0	0	0	0	0	0	0	0
231	0	0	0	0	0	0	0	0	0	0	0	0	0	0	0	0	0	0.852976	1.10992	1.17685	1.24374	1.31059	1.37741	1.44418	1.51092	1.57762	1.64427	1.71089	1.92929	2.15283	2.38151	2.61535	2.85433	3.09845	3.34773	3.60215	3.86172	4.12643	5.47748	6.85882	8.27045	9.71237	11.1846	12.6871	14.2199	15.783	17.3763	19	38.1395
232	0	0	0	0	0	0	0	0	0	0	0	0	0	0	0	0	0	0	0	0	0	0	0	0	0	0	0	0.17929	0.209962	0.241379	0.27354	0.306446	0.340096	0.37449	0.409628	0.44551	0.482137	0.519508	0.553661	0.588465	0.623922	0.660031	0.696792	0.734204	0.77227	0.810987	0.850356	0.890377	1.75136
233	0	0	0	0	0	0	0	0	0	0	0	0	0	0	0	0	0	0	0	0	0	0	0	0	0	0	0	0	0	0	0	0	0	0	0	0	0	0	0	0	0	0	0	0	0	0	0	0	0.134735
234	0	0	0	0	0	0	0	0	0	0	0	0	0	0	0	0	0	0	0	0	0	0	0	0	0	0	0	0	0	0	0	0	0	0	0	0	0	0	0	0	0	0	0	0	0	0	0	0	0
238	0	0	0	0	0	0	0	0	0	0	0	0	0	0	0	0	0	0	0	0	0	0	0	0	0	0	0	0	0	0	0	0	0	0	0	0	0	0	0	0	0	0	0	0	0	0	0	0	0
242	0	0	0	0	0	0	0	0	0	0	0	0	0	0	0	0	0	0	0	0	0	0	0	0	0	0	0	0	0	0	0	0	0	0	0	0	0	0	0	0	0	0	0	0	0	0	0	0	0.159
246	0	0	0	0	0	0	0	0	0	0	0	0	0	0	0	0	0	0	0	0	0	0	0	0	0	0	0	0	0	0	0	0	0	0	0	0	0	0	0	0	0	0	0	0	0	0	0	0	0
250	0	0	0	0	0	0	0	0	0	0	1.29627	1.65037	2.03933	1.95435	1.82611	1.85023	1.85765	2.06515	2.27731	2.72882	3.19884	3.93527	5.47214	8.52034	5.95643	8.17881	10.0633	11.8093	12.8664	13.947	15.0514	16.1794	17.3311	18.5065	19.7055	20.9282	22.1746	23.4447	38.5485	53.9971	69.7905	85.9288	102.412	119.24	136.413	153.93	171.793	190	205.689
254	0	0	0	0	0	0	0	0	0	0	0	0	0	0	0	0	0	0	0	0	0	0	0	0	0	0	0	0	0	0	0	0	0	0	0	0	0	0	0	0	0	0	0	0	0	0	0	0	0.158035
258	0	0	0	0	0	0	0	0	0	0	0	0	0	0	0	0	0	0	0	0	0	0	0	0	0	0	0	0	0	0	0	0	0	0	0	0	0	0	0	0	0	0	0	0	0	0	0	0	0
262	0	0	0	0	0	0	0	0	0	0	0	0	0	0	0	0	0	0	0	0	0	0	0	0	0	0	0	0	0	0	0	0	0	0	0	0	0	0	0	0	0	0	0	0	0	0	0	0	0.0609605
266	0	0	0	0	0	0	0	0	0	0	0	0	0	0	0	0	0	0	0	0	0	0	0	0	0	0	0	0	0	0	0	0	0	0	0	0	0	0	0	0	0	0	0	0	0	0	0	0	0.636
268	0	0	0	0	0	0	0	0	0	0	0.243699	0.286781	0.333418	0.383712	0.437724	0.495464	0.556873	0.621796	0.689949	0.750182	0.808294	1.23209	1.65753	2.07532	1.6438	2.01228	2.31907	2.53034	2.81595	3.10819	3.40705	3.71255	4.02467	4.34342	4.6688	5.00081	5.33944	5.68471	7.82397	10.0114	12.2471	14.5309	16.863	19.2432	21.6716	24.1482	26.6731	29.2461	35.4593
270	0	0	0	0	0	0	0	0	0	0	0	0	0	0	0	0	0	0	0	0	0	0	0	0	0	0	0	0.799814	0.780494	0.760384	0.739486	0.717798	0.695321	0.672055	0.648	0.623156	0.597523	0.571101	0.576064	0.580986	0.585867	0.590707	0.595507	0.600266	0.604984	0.609661	0.614297	0.618893	0.621498
275	0	0	0	0	0	0	0	0	0	0	0	0	0	0	0	0	0	0	0	0	0	0	0	0	0	0	0	0.0560866	0.0727863	0.0899059	0.107445	0.125404	0.143783	0.162582	0.1818	0.201438	0.221496	0.241974	0.302209	0.363779	0.426683	0.490921	0.556495	0.623403	0.691645	0.761222	0.832134	0.90438	3.06578
276	0	0	0	0	0	0	0	0	0	0	0	0	0	0	0	0	0	0	0	0	0.743816	1.25444	2.14299	2.76619	1.53789	2.07866	2.36413	2.25557	2.61982	2.99286	3.3747	3.76533	4.16476	4.57298	4.98999	5.4158	5.8504	6.2938	13.4711	20.8135	28.3212	35.994	43.832	51.8352	60.0036	68.3372	76.836	85.5	94.7665
288	0	0	0	0	0	0	0	0	0	0	0	0	0	0	0	0	0	0	0	0	0	0	0	0	0	0	0	0.947167	1.00146	1.05684	1.11332	1.1709	1.22957	1.28935	1.35021	1.41218	1.47523	1.53939	1.565	1.59079	1.61676	1.6429	1.66921	1.6957	1.72236	1.74919	1.7762	1.80339	2.41464
292	0	0	0	0	0	0	0	0	0	0	0	0	0	0	0	0	0	0	0	0	0	0	0	0	0	0	0	0	0	0	0	0	0	0	0	0	0	0	0	0	0	0	0	0	0	0	0	0	0
296	0	0	0	0	0	0	0	0	0	0	0	0	0	0	0	0	0	0	0	0	0	0	0	0	0	0	0	0	0	0	0	0	0	0	0	0	0	0	0	0	0	0	0	0	0	0	0	0	0
300	0	0	0	0	0	0	0	0	0	0	1.13873	1.2727	1.40666	1.34805	1.25595	1.03993	0.777014	0.882514	0.994712	1.11361	1.2392	1.41068	1.60661	1.80019	1.35643	1.57412	2.46166	2.56214	2.85768	3.16011	3.46941	3.7856	4.10866	4.4386	4.77542	5.11911	5.46969	5.82714	12.0213	18.3579	24.8369	31.4584	38.2224	45.1288	52.1776	59.3689	66.7027	74.179	115.461
304	0	0	0	0	0	0	0	0	0	0	0	0	0	0	0	0	0	0	0	0	0	0	0	0	0	0	0	0	0	0	0	0	0	0	0	0	0	0	0	0	0	0	0	0	0	0	0	0	0
308	0	0	0	0	0	0	0	0	0	0	0	0	0	0	0	0	0	0	0	0	0	0	0	0	0	0	0	0	0	0	0	0	0	0	0	0	0	0	0	0	0	0	0	0	0	0	0	0	0
312	0	0	0	0	0	0	0	0	0	0	0	0	0	0	0	0	0	0	0	0	0	0	0	0	0	0	0	0	0	0	0	0	0	0	0	0	0	0	0	0	0	0	0	0	0	0	0	0	0.0858624
316	0	0	0	0	0	0	0	0	0	0	0	0	0	0	0	0	0	0	0	0	0	0	0	0	0	0	0	0	0	0	0	0	0	0	0	0	0	0	0	0	0	0	0	0	0	0	0	0	0
320	0	0	0	0	0	0	0	0	0	0	0	0	0	0	0	0	0	0	0.739657	1.14412	1.56392	1.6999	1.82864	1.94632	2.04797	2.12694	1.55264	1.72823	1.78696	1.84664	1.90725	1.9688	2.03128	2.09471	2.15908	2.22439	2.29063	2.35782	3.61949	4.90986	6.22893	7.5767	8.95316	10.3583	11.7922	13.2547	14.746	16.2659	18.7
324	0	0	0	0	0	0	0	0	0	0	0	0	0	0	0	0	0	0	0	0	0	1.07846	1.28884	1.53648	1.82756	2.1693	2.57002	3.0394	3.14093	3.24405	3.34878	3.45512	3.56306	3.67261	3.78376	3.89652	4.01088	4.12685	4.18786	4.24916	4.31075	4.37263	4.4348	4.49726	4.56001	4.62305	4.68638	4.75	7.155
328	0	0	0	0	0	0	0	0	0	0	0	0.482861	0.657087	0.885428	1.18316	1.56951	2.06859	2.71044	3.53234	4.58021	5.91017	6.67931	7.45058	8.84457	10.2318	11.5858	11.5865	12.7463	13.5915	14.4545	15.3352	16.2338	17.15	18.0841	19.0359	20.0055	20.9928	21.998	22.4675	22.9419	23.4212	23.9054	24.3945	24.8885	25.3874	25.8912	26.3999	26.9135	36.8323
332	0	0	0	0	0	0	0	0	0	0	0	0	0	0	0	0	0	0	0	0	0	0	0	0	0	0	0	0.0300897	0.0664971	0.103852	0.142154	0.181404	0.221602	0.262747	0.304839	0.347879	0.391867	0.436802	0.828474	1.22913	1.63878	2.05742	2.48505	2.92167	3.36727	3.82187	4.28545	4.75803	7.96343
334	0	0	0	0	0	0	0	0	0	0	0	0	0	0	0	0	0	0	0	0	0	0	0	0	0	0	0	0	0	0	0	0	0	0	0	0	0	0	0	0	0	0	0	0	0	0	0	0	0
336	0	0	0	0	0	0	0	0	0	0	0	0	0	0	0	0	0	0	0	0	0	0	0	0	0	0	0	0	0	0	0	0	0	0	0	0	0	0	0	0	0	0	0	0	0	0	0	0	0
340	0	0	0	0	0	0	0	0	0	0	0	0	0	0	0	0	0	0	0	0	0	0	0	0	0	0	0	0.208986	0.231684	0.254906	0.278651	0.302921	0.327715	0.353032	0.378874	0.405239	0.432129	0.459542	0.978607	1.50962	2.05257	2.60748	3.17432	3.75312	4.34385	4.94654	5.56117	6.18774	11.1507
0	0	0	0	0	0	0	0	0	0	0	0	0	0	0	0	0	0	0	0	0	0	0	0	0	0	0	0	0	0	0	0	0	0	0	0	0	0	0	0	0	0	0	0	0	0	0	0	0	0
348	0	0	0	0	0	0	0	0	0	0	0	0	0	0	0	0	0	0	0	0	0	0	0	0	0	0	0	0.148469	0.18403	0.220475	0.257803	0.296016	0.335112	0.375091	0.415955	0.457702	0.500333	0.543848	1.10996	1.68909	2.28123	2.88639	3.50457	4.13576	4.77998	5.4372	6.10745	6.79071	13.2408
352	0	0	0	0	0	0	0	0	0	0	0	0	0	0	0	0	0	0	0	0	0	0	0	0	0	0	0	0	0	0	0	0	0	0	0	0	0	0	0	0	0	0	0	0	0	0	0	0	0
356	0	0	0	0	0	0	6.46843	13.5211	27.6866	55.807	111.099	118.526	124.764	129.871	133.91	136.954	139.075	140.349	140.852	140.658	139.839	138.465	136.601	134.311	131.652	128.679	125.444	145.071	189.394	234.833	281.387	329.057	377.842	427.742	478.758	530.89	584.137	638.5	1599.13	2581.92	3586.88	4614.01	5663.3	6734.76	7828.38	8944.17	10082.1	11242.2	13281.5
360	0	0	0	0	0	0	0	0	0	0	0	0.525326	0.697044	0.911423	1.17704	1.504	1.90415	2.3914	2.98202	3.69504	4.55267	5.92439	7.61226	9.67707	14.3468	19.1752	22.6818	27.0615	32.7736	38.6266	44.6203	50.7549	57.0304	63.4466	70.0037	76.7016	83.5403	90.5198	168.426	248.12	329.6	412.868	497.922	584.764	673.392	763.808	856.01	950	1415.1
364	0	0	0	0	0.135369	0.9578	6.03414	7.58065	6.45926	7.15487	11.9248	13.59	15.2846	17.0011	18.732	20.4701	22.2079	21.0809	19.7208	21.3793	23.036	24.9445	26.8452	19.1513	20.849	22.5316	28.4562	27.0615	31.7997	34.9977	38.2679	41.6103	45.0249	48.5117	52.0707	55.7019	59.4053	63.1809	83.3318	103.934	124.988	146.492	168.449	190.856	213.715	237.025	260.787	285	985.8
368	0	0	0	0.0673027	0.152646	1.04077	11.2403	16.4746	18.8967	24.2958	16.1972	18.5448	20.9366	22.3432	23.6477	23.7205	23.5911	42.8722	63.2821	58.5775	53.3263	47.5983	38.0078	27.9922	28.2495	28.4139	35.6068	19.4229	30.5023	32.5842	34.7096	36.8788	39.0916	41.348	43.6481	45.9918	48.3792	50.8102	71.1562	91.9615	113.226	134.95	157.133	179.775	202.877	226.438	250.458	274.937	372.728
372	0	0	0	0	0	0	0	0	0	0	0	0	0	0	0	0	0	0	0	0	0	0	0	0	0	0	0	0	0	0	0	0	0	0	0	0	0	0	0	0	0	0	0	0	0	0	0	0	0
376	0	0	0	0	0	0	0	0	0	0	0	0	0	0	0	0	0	0	0	0	0	0	0	0	0	0	0	1.12688	1.33873	1.55575	1.77795	2.00534	2.2379	2.47564	2.71856	2.96667	3.21995	3.47841	4.23227	5.00272	5.78975	6.59336	7.41354	8.25031	9.10366	9.97359	10.8601	11.7632	27.6942
380	0	0	0	0	0	0	0	0	0	0	0	1.32275	20.9336	20.6264	20.0668	14.0663	7.4574	11.3986	15.5092	17.8125	20.9379	26.5208	35.0492	51.9465	33.7024	38.1397	56.3403	57.4279	63.9959	70.7166	77.59	84.616	91.7948	99.1262	106.61	114.247	122.037	129.979	230.212	332.74	437.564	544.683	654.098	765.808	879.814	996.115	1114.71	1235.6	1574.71
384	0	0	0	0	0	0	0	0	0	0	0	0	0	0	0	0	0	0	0	0	0	0	0	0	0	0	0	0.108516	0.125737	0.143373	0.161424	0.17989	0.198772	0.218068	0.23778	0.257907	0.278449	0.299406	0.351755	0.40524	0.459861	0.515617	0.572509	0.630536	0.689699	0.749997	0.811431	0.874	1.31652
388	0	0	0	0	0	0	0	0	0	0	0	0	0	0	0	0	0	0	0	0	0	0	0	0	0	0	0	0.115293	0.180862	0.248116	0.317056	0.38768	0.459989	0.533984	0.609663	0.687028	0.766077	0.846812	1.32838	1.82091	2.32441	2.83888	3.36431	3.90071	4.44808	5.00642	5.57573	6.156	8.6496
392	0	0	0	0	0	0	0	0	0	0	0	2.64927	4.02919	6.80939	9.90031	15.7138	22.0185	33.1729	43.1604	57.0716	60.3329	65.7139	55.8436	64.171	81.73	107.069	144.847	219.043	243.172	267.86	293.106	318.91	345.272	372.192	399.671	427.707	456.302	485.455	660.812	840.114	1023.36	1210.55	1401.69	1596.78	1795.8	1998.78	2205.7	2416.56	2459.45
398	0	0	0	0	0	0	0	0	0	0	0	0	0	0	0	0	0	0	0.723491	0.959174	1.26748	1.66999	2.19454	2.87699	3.7635	4.91346	6.40318	8.33066	11.6828	15.1202	18.643	22.251	25.9443	29.7229	33.5868	37.536	41.5704	45.6902	106.7	169.115	232.937	298.166	364.8	432.841	502.288	573.142	645.402	719.068	740.351
400	0	0	0	0	0	0	0	0	0	0	0	0	0	0	0	0	0	0	0	0	0	0	0	0	0	0	0	0.787646	0.846812	0.907258	0.968985	1.03199	1.09628	1.16185	1.2287	1.29683	1.36624	1.43693	2.09374	2.76543	3.452	4.15345	4.86978	5.60099	6.34708	7.10806	7.88392	8.67466	11.7601
404	0	0	0	0	0	0	0	0	0	0	0	0	0	0	0	0	0	0	0	0	0	0	0	0	0	0	0	0.678902	0.813625	0.951656	1.09299	1.23764	1.38559	1.53685	1.69142	1.84929	2.01047	2.17496	2.38469	2.59871	2.81701	3.03959	3.26645	3.4976	3.73303	3.97274	4.21673	4.46501	5.82895
408	0	0	0	0	0	0	0	0	0	0	0	0.503996	0.700006	0.96245	1.31179	1.7742	2.38297	3.18008	4.21795	4.89047	5.56685	6.80147	9.17196	6.9056	8.0169	9.01759	10.9318	12.9661	16.3899	19.8992	23.4941	27.1745	30.9404	34.792	38.729	42.7516	46.8598	51.0535	63.7155	76.658	89.881	103.384	117.168	131.233	145.578	160.203	175.109	190.296	232.268
410	0	0	0	0	0	0	0	0	0	0	0	0	0.540906	0.798606	1.16875	1.69719	2.44721	3.50559	4.99032	5.77859	6.5677	8.00919	10.7751	8.08789	9.35115	10.4579	12.5673	14.686	19.4061	24.2453	29.2036	34.2809	39.4773	44.7927	50.2272	55.7808	61.4534	67.2451	85.6231	104.41	123.606	143.211	163.225	183.648	204.48	225.721	247.371	269.43	328.82
414	0	0	0	0	0	0	0	0	0	0	0	0	0	0	0	0	0	0	0	0	0	0	0	0	0	0	0	0.107765	0.115916	0.124243	0.132746	0.141427	0.150284	0.159318	0.168528	0.177915	0.187479	0.197219	0.228004	0.25945	0.291558	0.324328	0.35776	0.391854	0.42661	0.462028	0.498108	0.53485	0.447585
417	0	0	0	0	0	0	0	0	0	0	0	3.13691	3.66557	4.24211	4.86927	5.54973	6.28604	7.08055	7.93532	8.62106	9.30912	10.3788	11.4618	12.5476	13.6246	14.6791	16.9679	19.2166	23.5204	27.9308	32.4476	37.071	41.8008	46.6372	51.5801	56.6296	61.7855	67.0479	89.7588	112.98	136.71	160.95	185.701	210.96	236.73	263.01	289.799	317.098	343.881
418	0	0	0	0	0	0	0	0	0	0	0	0	0	0	0	0	0	0	0	0	0	0	0	0	0	0	0	0.186917	0.212935	0.239571	0.266827	0.294702	0.323196	0.352309	0.382041	0.412392	0.443363	0.474952	0.70414	0.938527	1.17812	1.4229	1.67289	1.92808	2.18847	2.45405	2.72484	3.00083	4.18537
422	0	0	0	0	0	0	0	0	0	0	1.29917	1.62512	2.0084	2.45692	2.33162	2.19554	2.05286	1.9069	1.76025	1.70528	1.63535	1.75493	1.86462	1.96012	1.5526	1.628	1.82805	1.46382	1.51797	1.57303	1.629	1.68589	1.74369	1.8024	1.86202	1.92255	1.98399	2.04635	2.68195	3.33178	3.99583	4.67411	5.3666	6.07332	6.79426	7.52942	8.2788	9.0424	13.208
426	0	0	0	0	0	0	0	0	0	0	0	0	0	0	0	0	0	0	0	0	0	0	0	0	0	0	0	0	0	0	0	0	0	0	0	0	0	0	0	0	0	0	0	0	0	0	0	0	0.0403829
428	0	0	0	0	0	0	0	0	0	0	0	0	0	0	0	0	0	0	0	0	0	0	0	0	0	0	0	0	0	0	0	0	0	0	0	0	0	0	0	0	0	0	0	0	0	0	0	0	0.024752
430	0	0	0	0	0	0	0	0	0	0	0	0	0	0	0	0	0	0	0	0	0	0	0	0	0	0	0	0	0	0	0	0	0	0	0	0	0	0	0	0	0	0	0	0	0	0	0	0	0
434	0	0	0	0	0	0	0	0	0	0	2.03802	2.59088	3.21661	3.205	3.12979	3.5868	4.07827	4.605	5.16778	5.65205	6.15834	4.58914	2.78405	4.42258	6.23075	8.21255	8.6433	9.08068	10.1905	11.3264	12.4882	13.6761	14.89	16.13	17.3959	18.6879	20.0059	21.3499	22.8809	24.4418	26.0324	27.6527	29.3029	30.9828	32.6924	34.4319	36.201	38	44.7352
438	0	0	0	0	0	0	0	0	0	0	0	0	0	0	0	0	0	0	0	0	0	0	0	0	0	0	0	0	0	0	0	0	0	0	0	0	0	0	0	0	0	0	0	0	0	0	0	0	0
440	0	0	0	0	0	0	0	0	0	0	0	0	0	0	0	0	0	0	0	0	0	0	0	0	0	0	0	0	0	0	0	0	0	0	0	0	0	0	0	0	0	0	0	0	0	0	0	0	0.121292
442	0	0	0	0	0	0	0	0	0	0	0	0	0	0	0	0	0	0	0	0	0	0	0	0	0	0	0	0	0	0	0	0	0	0	0	0	0	0	0	0	0	0	0	0	0	0	0	0	0
446	0	0	0	0	0	0	0	0	0	0	0	0	0	0	0	0	0	0	0	0	0	0	0	0	0	0	0	0	0	0	0	0	0	0	0	0	0	0	0	0	0	0	0	0	0	0	0	0	0
450	0	0	0	0	0	0	0	0	0	0	0	0	0	0	0	0	0	0	0	0	0	0	0	0	0	1.24147	1.56873	1.91731	2.26168	2.61444	2.97559	3.34513	3.72306	4.10938	4.50408	4.90718	5.31867	5.73855	6.08102	6.42989	6.78515	7.14681	7.51486	7.8893	8.27014	8.65738	9.051	9.45103	55.3631
454	0	0	0	0	0	0	0	0	0	0	0	0	0	0	0	0	0	0	0	0	0	0	0	0	0	0	0	0	0	0	0	0	0	0	0	0	0	0	0	0	0	0	0	0	0	0	0	0	0.152639
458	0	0	0	0	0	0	0	0	0	0	0	0	0	0	0	0	0	0	0	0	0	1.10693	1.35438	1.62045	1.90511	2.20837	2.87792	3.59445	4.22157	4.86393	5.52154	6.19439	6.88248	7.58581	8.30438	9.0382	9.78726	10.5516	18.2081	26.0399	34.0468	42.2289	50.5861	59.1185	67.8262	76.7089	85.7669	95	115.752
462	0	0	0	0	0	0	0	0	0	0	0	0	0	0	0	0	0	0	0	0	0	0	0	0	0	0	0	0	0	0	0	0	0	0	0	0	0	0	0	0	0	0	0	0	0	0	0	0	0
466	0	0	0	0	0	0	0	0	0	0	0	0	0	0	0	0	0	0	0	0	0	0	0	0.909098	1.0506	1.18094	1.42724	1.68668	1.96734	2.2548	2.54905	2.85009	3.15793	3.47256	3.79398	4.1222	4.45721	4.79902	5.01493	5.23455	5.45787	5.68491	5.91565	6.1501	6.38826	6.63013	6.87571	7.12499	13.1175
470	0	0	0	0	0	0	0	0	0	0	0	0	0	0	0	0	0	0	0	0	0	0	0	0	0	0	0	0.0072041	0.00803405	0.00888331	0.00975188	0.0106398	0.011547	0.0124735	0.0134193	0.0143844	0.0153689	0.0163727	0.0308375	0.0456342	0.0607628	0.0762233	0.0920157	0.10814	0.124596	0.141384	0.158505	0.175957	0.294496
474	0	0	0	0	0	0	0	0	0	0	0	0	0	0	0	0	0	0	0	0	0	0	0	0	0	0	0	0.0175237	0.0274877	0.0377078	0.048184	0.0589162	0.0699046	0.0811489	0.0926494	0.104406	0.116418	0.128687	0.190929	0.254583	0.31965	0.386129	0.45402	0.523323	0.594039	0.666167	0.739707	0.81466	0.81809
478	0	0	0	0	0	0	0	0	0	0	0	0	0	0	0	0	0	0	0	0	0	0	0	1.25785	1.42582	1.58927	1.9187	2.26498	2.63114	3.00614	3.38997	3.78265	4.18417	4.59453	5.01374	5.44178	5.87866	6.32439	6.61891	6.91856	7.22332	7.5332	7.8482	8.16833	8.49357	8.82392	9.1594	9.5	9.5636
480	0	0	0	0	0	0	0	0	0	0	0	0	0	0	0	0	0	0	0	0	0	0	0	0	0	0	0	0.00241723	0	0	0	0	0	0	0	0	0	0.0471906	0	0	0	0	0	0	0	0	0	0.248611	0
484	0	0	0	0	0	0	0	0	0	0	13.3452	16.0541	19.0989	22.5152	26.3419	30.6217	35.4016	40.733	46.6722	58.195	71.0642	86.6218	103.85	122.833	143.656	166.41	7.08102	30.0807	36.5944	43.269	50.1044	57.1007	64.2578	71.5758	79.0547	86.6944	94.495	102.456	160.289	219.439	279.906	341.69	404.791	469.209	534.943	601.995	670.363	740.049	990.887
492	0	0	0	0	0	0	0	0	0	0	0	0	0	0	0	0	0	0	0	0	0	0	0	0	0	0	0	0	0	0	0	0	0	0	0	0	0	0	0	0	0	0	0	0	0	0	0	0	0
496	0	0	0	0	0	0	0	0	0	0	0	0	0	0	0	0	0	0	0	0	0	0	0	0	0	0	0	0.0892589	0.110565	0.132401	0.154766	0.17766	0.201084	0.225037	0.24952	0.274531	0.300073	0.326143	0.489488	0.656541	0.827305	1.00178	1.17996	1.36185	1.54745	1.73676	1.92978	2.12651	2.37274
498	0	0	0	0	0	0	0	0	0	0	0	0	0	0	0	0	0	0	0	0	0	0	0	0	0	0	0	0.506806	0.638531	0.773544	0.911846	1.05344	1.19832	1.34648	1.49794	1.65268	1.81072	1.97204	4.02314	6.12141	8.26683	10.4594	12.6992	14.9861	17.3201	19.7014	22.1298	24.6053	35.6452
500	0	0	0	0	0	0	0	0	0	0	0	0	0	0	0	0	0	0	0	0	0	0	0	0	0	0	0	0	0	0	0	0	0	0	0	0	0	0	0	0	0	0	0	0	0	0	0	0	0
504	0	0	0	0	0	0	0	0	0	0	2.0697	2.40853	2.76987	3.15425	3.56207	3.99365	4.44914	4.92852	5.43158	6.06793	6.70491	6.48379	6.22829	7.02572	6.33271	5.29281	7.93458	6.14599	7.49608	8.87953	10.2964	11.7466	13.2301	14.7471	16.2974	17.8811	19.4982	21.1486	25.5506	30.0491	34.6442	39.336	44.1243	49.0092	53.9907	59.0687	64.2434	69.5146	193.909
508	0	0	0	0	0	0	0	0	0	0	0	0	0	0	0	0	0	0	0	0	0.926539	1.42545	1.96566	2.54641	3.1669	3.82635	4.96045	6.16267	7.07274	8.00459	8.95824	9.93367	10.9309	11.9499	12.9907	14.0533	15.1376	16.2438	17.7154	19.2168	20.748	22.3089	23.8996	25.5202	27.1704	28.8505	30.5604	32.3	9.59925
512	0	0	0	0	0	0	0	0	0	0	0	0	0	0	0	0	0	0	0	0	0	0	0	0	0	0	0	0	0	0	0	0	0	0	0	0	0	0	1.72	3.48	5.28	7.12	9	10.92	12.88	14.88	16.92	19	19.08
516	0	0	0	0	0	0	0	0	0	0	0	0	0	0	0	0	0	0	0	0	0	0	0	0	0	0	0	0.0669214	0.0915278	0.116758	0.142613	0.169091	0.196194	0.223921	0.252272	0.281246	0.310845	0.341068	0.396573	0.453275	0.511174	0.570271	0.630566	0.692057	0.754747	0.818634	0.883718	0.95	1.431
520	0	0	0	0	0	0	0	0	0	0	0	0	0	0	0	0	0	0	0	0	0	0	0	0	0	0	0	0	0	0	0	0	0	0	0	0	0	0	0	0	0	0	0	0	0	0	0	0	0
524	0	0	0	0	0	0	0	0	0	0	0	0	0	0	0	0	0	0	0	0	0	0	0	0	0	0	0	0.519244	0.665053	0.814516	0.967633	1.12441	1.28483	1.44892	1.61665	1.78805	1.96309	2.14179	3.21449	4.31155	5.43297	6.57875	7.74889	8.94339	10.1623	11.4055	12.6731	13.965	22.8165
528	0	0	0	0	0	0	0	0	0	0	0	0	0	0	0	0	0	0	0	0	0	0	0	0	0.280593	0.443122	0.618422	0.806493	0.840985	0.876103	0.911845	0.948212	0.985203	1.02282	1.06106	1.09993	1.13942	1.17953	2.32188	3.49047	4.6853	5.90637	7.15369	8.42725	9.72706	11.0531	12.4054	13.7839	23.07
530	0	0	0	0	0	0	0	0	0	0	0	0	0	0	0	0	0	0	0	0	0	0	0	0	0	0	0	0	0	0	0	0	0	0	0	0	0	0	0	0	0	0	0	0	0	0	0	0	0
533	0	0	0	0	0	0	0	0	0	0	0	0	0	0	0	0	0	0	0	0	0	0	0	0	0	0	0	0	0	0	0	0	0	0	0	0	0	0	0	0	0	0	0	0	0	0	0	0	0
540	0	0	0	0	0	0	0	0	0	0	0	0	0	0	0	0	0	0	0	0	0	0	0	0	0	0	0	0	0	0	0	0	0	0	0	0	0	0	0	0	0	0	0	0	0	0	0	0	0.318
548	0	0	0	0	0	0	0	0	0	0	0	0	0	0	0	0	0	0	0	0	0	0	0	0	0	0	0	0	0	0	0	0	0	0	0	0	0	0	0	0	0	0	0	0	0	0	0	0	0
554	0	0	0	0	0	0	0	0	0	0	0	0	0	0	0	0	0	0	0	0	0	0	0	0	0	0	0	0	0	0	0	0	0	0	0	0	0	0	2.75909	5.58235	8.46978	11.4214	14.4371	17.517	20.6611	23.8694	27.1418	30.4784	35.5688
558	0	0	0	0	0	0	0	0	0	0	0	0	0	0	0	0	0	0	0	0	0	0	0	0	0	0	0	0.0507524	0.0603946	0.0702727	0.0803867	0.0907367	0.101323	0.112145	0.123202	0.134496	0.146026	0.157791	0.28699	0.41915	0.554272	0.692355	0.8334	0.977406	1.12437	1.2743	1.42719	1.58304	3.70932
562	0	0	0	0	0	0	0	0	0	0	0	0	0	0	0	0	0	0	0	0	0	0	0	0	0	0	0	0.40398	0.469152	0.535898	0.604216	0.674108	0.745573	0.818612	0.893224	0.969409	1.04717	1.1265	1.17899	1.23238	1.28669	1.34192	1.39805	1.4551	1.51306	1.57193	1.63172	1.69242	3.68234
566	0	0	0	0	0	0	0	0	0	0	0	0	0	0	0	0	0	0	0	0	0	0	0	0	0	0	0	0.679403	0.756578	0.835544	0.916304	0.998856	1.0832	1.16934	1.25727	1.34699	1.4385	1.53181	1.58747	1.644	1.70142	1.7597	1.81886	1.8789	1.93981	2.0016	2.06426	2.1278	25.5224
570	0	0	0	0	0	0	0	0	0	0	0	0	0	0	0	0	0	0	0	0	0	0	0	0	0	0	0	0	0	0	0	0	0	0	0	0	0	0	0	0	0	0	0	0	0	0	0	0	0
574	0	0	0	0	0	0	0	0	0	0	0	0	0	0	0	0	0	0	0	0	0	0	0	0	0	0	0	0	0	0	0	0	0	0	0	0	0	0	0	0	0	0	0	0	0	0	0	0	0
578	0	0	0	0	0	0	0	0	0	0	0	0	0	0	0	0	0	0	0	0	0	0	0	0	0	0	0	0	0	0	0	0	0	0	0	0	0	0	0	0	0	0	0	0	0	0	0	0	1.1706
580	0	0	0	0	0	0	0	0	0	0	0	0	0	0	0	0	0	0	0	0	0	0	0	0	0	0	0	0	0	0	0	0	0	0	0	0	0	0	0	0	0	0	0	0	0	0	0	0	0
583	0	0	0	0	0	0	0	0	0	0	0	0	0	0	0	0	0	0	0	0	0	0	0	0	0	0	0	0	0	0	0	0	0	0	0	0	0	0	0	0	0	0	0	0	0	0	0	0	0
584	0	0	0	0	0	0	0	0	0	0	0	0	0	0	0	0	0	0	0	0	0	0	0	0	0	0	0	0	0	0	0	0	0	0	0	0	0	0	0	0	0	0	0	0	0	0	0	0	0
585	0	0	0	0	0	0	0	0	0	0	0	0	0	0	0	0	0	0	0	0	0	0	0	0	0	0	0	0	0	0	0	0	0	0	0	0	0	0	0	0	0	0	0	0	0	0	0	0	0.477
586	0	0	0	0	0	0	15.4079	27.2362	47.1622	80.3902	135.337	147.619	158.485	169.937	179.916	188.421	195.479	210.451	223.487	241.55	257.19	256.049	253.886	242.064	260.814	263.449	324.597	378.01	433.462	490.241	548.346	607.778	668.537	730.622	794.034	858.772	924.837	992.229	1236.77	1486.72	1742.09	2002.87	2269.07	2540.68	2817.71	3100.16	3388.02	3681.29	4447.96
591	0	0	0	0	0	0	0	0	0	0	0	0	0	0	0	0	0	0	0	0	0	0	0	0	0	0	0	0.198424	0.227504	0.25728	0.287751	0.318918	0.350781	0.383339	0.416593	0.450542	0.485188	0.520528	0.962408	1.41442	1.87657	2.34885	2.83127	3.32382	3.8265	4.33932	4.86227	5.39535	6.30776
598	0	0	0	0	0	0	0	0	0	0	0	0	0	0	0	0	0	0	0	0	0	0	0	0	0	0	0	0	0	0	0	0	0	0	0	0	0	0	0	0	0	0	0	0	0	0	0	0	0
600	0	0	0	0	0	0	0	0	0	0	0	0	0	0	0	0	0	0	0	0	0	0	0	0	0	0	0	0	0	0	0	0	0	0	0	0	0	0	0	0	0	0	0	0	0	0	0	0	4.77
604	0	0	0	0	0	0	0	0	0	7.85026	9.1291	10.6346	12.2394	13.9438	15.7466	17.6448	19.6329	21.7027	23.8413	27.6134	31.3926	34.0402	36.5086	38.7083	40.5214	41.7828	13.0757	14.1489	14.2722	14.3938	14.5136	14.6317	14.7481	14.8628	14.9758	15.087	15.1965	15.3043	23.568	32.0197	40.6594	49.487	58.5027	67.7063	77.098	86.6776	96.4452	106.401	229.519
608	0	0	0	0	0	0	0	0	0	0	0	0	0	0	0	0	0	0	0	0	0	0	0	0	0	1.33583	2.22808	3.62319	5.15496	6.72577	8.33562	9.98451	11.6724	13.3994	15.1654	16.9705	18.8145	20.6977	51.4139	82.8387	114.972	147.815	181.365	215.625	250.593	286.27	322.656	359.75	410.764
612	0	0	0	0	0	0	0	0	0	0	0	0	0	0	0	0	0	0	0	0	0	0	0	0	0	0	0	0	0	0	0	0	0	0	0	0	0	0	0	0	0	0	0	0	0	0	0	0	0
616	0	0	0	0	0	0	0	0	0	0	0	0	0	0	0	0	0	0	0	0	0	0	0	0	0	0	0	0.124256	0.140872	0.157882	0.175286	0.193083	0.211273	0.229858	0.248836	0.268208	0.287973	0.308132	0.685644	1.07185	1.46675	1.87035	2.28264	2.70363	3.13331	3.57169	4.01876	4.47453	18.7224
620	0	0	0	0	0	0	0	0	0	0	0.979244	1.19565	1.29817	1.39528	1.48663	1.41465	1.32033	1.37746	1.42834	1.84044	2.26311	2.88104	3.49786	4.87912	3.49775	5.03556	7.79891	7.63388	8.60707	9.6032	10.6223	11.6642	12.7292	13.817	14.9278	16.0615	17.2182	18.3978	33.9528	49.8645	66.133	82.7581	99.74	117.079	134.774	152.826	171.235	190	222.882
624	0	0	0	0	0	0	0	0	0	0	0	0	0	0	0	0	0	0	0	0	0	0	0	0	0	0	0	1.00092	1.05814	1.11651	1.17604	1.23672	1.29855	1.36154	1.42568	1.49098	1.55743	1.62504	1.65174	1.67862	1.70567	1.73291	1.76031	1.7879	1.81566	1.8436	1.87171	1.9	4.293
626	0	0	0	0	0	0	0	0	0	0	0	0	0	0	0	0	0	0	0	0	0	0	0	0	0	0	0	0	0	0	0	0	0	0	0	0	0	0	0	0	0	0	0	0	0	0	0	0	0
630	0	0	0	0	0	0	0	0	0	0	0	0	0	0	0	0	0	0	0	0	0	0	0	0	0	0	0	0.00774192	0.0214113	0.0354376	0.049821	0.0645614	0.0796588	0.0951131	0.110925	0.127093	0.143618	0.160501	0.468859	0.784345	1.10696	1.4367	1.77357	2.11756	2.46868	2.82693	3.19231	3.56481	4.33918
634	0	0	0	0	0	0	0	0	0	0	0	0	0	0	0	0	0	0	0	0	0	0	0	0	0	0	0	0	0	0	0	0	0	0	0	0	0	0	0	0	0	0	0	0	0	0	0	0	0.0777115
638	0	0	0	0	0	0	0	0	0	0	0	0	0	0	0	0	0	0	0	0	0	0	0	0	0	0	0	0	0	0	0	0	0	0	0	0	0	0	0	0	0	0	0	0	0	0	0	0	0
642	0	0	0	0	0	0	0	0	0	0	0	0	0	0	0	0	0	0	0	0	0	0	0	0	0	0	0	0.0254296	0.0311185	0.0369482	0.0429186	0.0490299	0.0552819	0.0616747	0.0682084	0.0748828	0.0816979	0.0886539	0.169174	0.251542	0.335758	0.421822	0.509735	0.599496	0.691106	0.784564	0.87987	0.977024	4.18619
643	0	0	0	0	0	0	0	0	0	0	0	0	0	0	0	0	0	0	0	0	0	0.335844	0.5296	0.57483	0.601566	0.809469	1.05489	1.24434	1.57883	1.92169	2.27291	2.6325	3.00045	3.37677	3.76146	4.15451	4.55592	4.9657	7.51431	10.1208	12.7853	15.5076	18.2878	21.126	24.0221	26.9761	29.988	33.0578	166.982
646	0	0	0	0	0	0	0	0	0	0	0	0	0	0	0	0	0	0	0	0	0	0	0	0	0	0	0	0	0	0	0	0	0	0	0	0	0	0	0	0	0	0	0	0	0	0	0	0	0.636
654	0	0	0	0	0	0	0	0	0	0	0	0	0	0	0	0	0	0	0	0	0	0	0	0	0	0	0	0	0	0	0	0	0	0	0	0	0	0	0	0	0	0	0	0	0	0	0	0	0
659	0	0	0	0	0	0	0	0	0	0	0	0	0	0	0	0	0	0	0	0	0	0	0	0	0	0	0	0.00092595	0.00113061	0.00134034	0.00155512	0.00177497	0.00199988	0.00222985	0.00246488	0.00270497	0.00295012	0.00320033	0.00446219	0.00575251	0.0070713	0.00841856	0.00979429	0.0111985	0.0126312	0.0140923	0.0155819	0.0171	0.01431
660	0	0	0	0	0	0	0	0	0	0	0	0	0	0	0	0	0	0	0	0	0	0	0	0	0	0	0	0	0	0	0	0	0	0	0	0	0	0	0	0	0	0	0	0	0	0	0	0	0
662	0	0	0	0	0	0	0	0	0	0	0	0	0	0	0	0	0	0	0	0	0	0	0	0	0	0	0	0	0	0	0	0	0	0	0	0	0	0	0	0	0	0	0	0	0	0	0	0	0.159
666	0	0	0	0	0	0	0	0	0	0	0	0	0	0	0	0	0	0	0	0	0	0	0	0	0	0	0	0	0	0	0	0	0	0	0	0	0	0	0	0	0	0	0	0	0	0	0	0	0
670	0	0	0	0	0	0	0	0	0	0	0	0	0	0	0	0	0	0	0	0	0	0	0	0	0	0	0	0	0	0	0	0	0	0	0	0	0	0	0	0	0	0	0	0	0	0	0	0	0
674	0	0	0	0	0	0	0	0	0	0	0	0	0	0	0	0	0	0	0	0	0	0	0	0	0	0	0	0	0	0	0	0	0	0	0	0	0	0	0	0	0	0	0	0	0	0	0	0	0
678	0	0	0	0	0	0	0	0	0	0	0	0	0	0	0	0	0	0	0	0	0	0	0	0	0	0	0	0.160589	0.197735	0.235801	0.274789	0.314698	0.355528	0.397279	0.439951	0.483544	0.528059	0.573495	0.694217	0.817591	0.943615	1.07229	1.20361	1.33759	1.47422	1.61349	1.75542	1.9	3.18
682	0	0	0	0	0	0	0	0	0	0	0	0	0	0	0	0	0	0	0	0	0	0	0	0	0	0	0	0.229542	0.330528	0.434091	0.540231	0.648948	0.760242	0.874113	0.990561	1.10959	1.23119	1.35537	2.52418	3.71981	4.94224	6.19149	7.46755	8.77042	10.1001	11.4566	12.8399	14.25	66.462
686	0	0	0	0	0	0	0	0	0	0	0	0	0	0	0	0.745749	1.0039	1.34496	1.79435	2.38506	3.15981	4.17391	5.49888	7.22706	9.47764	12.4043	16.205	21.1346	21.8549	22.5867	23.33	24.0849	24.8513	25.6292	26.4187	27.2197	28.0323	28.8564	29.2863	29.7183	30.1524	30.5886	31.0269	31.4673	31.9098	32.3545	32.8012	33.25	38.955
690	0	0	0	0	0	0	0	0	0	0	0	0	0	0	0	0	0	0	0	0	0	0	0	0	0	0	0	0	0	0	0	0	0	0	0	0	0	0	0	0	0	0	0	0	0	0	0	0	0
694	0	0	0	0	0	0	0	0	0	0	0	0	0	0	0	0	0	0	0	0	0	0	0	0	0	0	0	0.0859358	0.0968622	0.108046	0.119487	0.131186	0.143142	0.155355	0.167826	0.180554	0.193539	0.206782	0.217585	0.228582	0.239774	0.251161	0.262743	0.274519	0.286489	0.298655	0.311015	0.323569	0.324932
702	0	0	0	0	0	0	0	0	0	0	0	0	0	0	0	0	0	0	0	0	0	0	0	0	0	0	0	0	0	0	0	0	0	0	0	0	0	0	0	0	0	0	0	0	0	0	0	0	0
703	0	0	0	0	0	0	0	0	0	0	0	0	0	0	0	0	0	0	0	0	0	0	0	0	0	0	0	0.00397868	0.00446004	0.00495267	0.00545657	0.00597174	0.00649818	0.0070359	0.00758488	0.00814514	0.00871666	0.00929946	0.0161323	0.0231215	0.0302671	0.037569	0.0450273	0.0526419	0.0604129	0.0683402	0.0764239	0.084664	0.0708504
704	0	0	0	0	0	0	0	0	0	0	0	0	0	0	0	0	0	0	0	0	1.0427	1.42814	1.84712	2.29968	2.78583	3.30558	4.30688	5.3782	7.40307	9.47933	11.607	13.786	16.0165	18.2984	20.6316	23.0163	25.4523	27.9398	51.2416	75.0777	99.4481	124.353	149.792	175.765	202.272	229.314	256.89	285	397.5
705	0	0	0	0	0	0	0	0	0	0	0	0	0	0	0	0	0	0	0	0	0	0	0	0	0	0	0	0.0155657	0.0174831	0.0194455	0.0214529	0.0235053	0.0256027	0.027745	0.0299324	0.0321648	0.0344422	0.0367645	0.0726262	0.109312	0.146821	0.185155	0.224312	0.264294	0.305099	0.346728	0.389181	0.432459	0.3619
706	0	0	0	0	0	0	0	0	0	0	0	0	0	0	0	0	0	0	0	0	0	0	0	0	0	0	0	0.39264	0.604768	0.822341	1.04536	1.27382	1.50773	1.74708	1.99187	2.24211	2.4978	2.75892	3.76999	4.80382	5.86041	6.93975	8.04186	9.16672	10.3143	11.4847	12.6779	13.8937	16.2776
710	0	0	0	0	0	0	0	0	0	0	0	0	0	0	0	0	0	0	0	0	0	0	0	0	0	0	1.29608	3.85424	4.66952	5.5049	6.36038	7.23596	8.13164	9.04743	9.98332	10.9393	11.9154	12.9116	46.5012	80.8683	116.013	151.936	188.636	226.113	264.368	303.401	343.212	383.8	449.652
716	0	0	0	0	0	0	0	0	0	0	0	0	0	0	0	0	0	0	0	0	0	0	0	0	0	0	0	0.419161	0.49194	0.566488	0.642803	0.720887	0.800739	0.882359	0.965747	1.0509	1.13783	1.22652	1.43505	1.6481	1.86567	2.08774	2.31433	2.54544	2.78106	3.02119	3.26584	3.515	5.43862
724	0	0	0	0	0	0	0	0	0	0	5.94892	7.06658	7.56603	8.00023	7.87244	7.57235	8.56914	9.63381	10.7672	11.9699	14.446	18.8732	27.4186	21.3545	26.723	36.8962	36.5595	43.3082	48.2633	53.3336	58.5191	63.8198	69.2357	74.7668	80.4131	86.1747	92.0514	98.0433	169.026	241.632	315.863	391.717	469.196	548.298	629.024	711.375	795.349	880.947	1024.73
732	0	0	0	0	0	0	0	0	0	0	0	0	0	0	0	0	0	0	0	0	0	0	0	0	0	0	0	0	0	0	0	0	0	0	0	0	0	0	0	0	0	0	0	0	0	0	0	0	0
736	0	0	0	0	0	0	0	0	0	0	3.04326	3.52423	4.03591	4.57985	5.15769	5.77115	6.42201	7.11213	7.84348	8.98163	10.1989	11.1364	12.1154	13.7993	15.5903	17.4888	19.648	21.9294	26.5081	31.1996	36.0039	40.9211	45.951	51.0937	56.3492	61.7175	67.1986	72.7925	83.484	94.4042	105.553	116.931	128.537	140.372	152.436	164.729	177.25	190	260.05
740	0	0	0	0	0	0	0	0	0	0	0	0	0	0	0	0	0	0	0	0	0	0	0	0	0	0	0	0.0511224	0.0583108	0.0656704	0.0732013	0.0809034	0.0887767	0.0968212	0.105037	0.113424	0.121982	0.130712	0.136225	0.14183	0.147528	0.153318	0.1592	0.165175	0.171243	0.177403	0.183655	0.19	0.159
744	0	0	0	0	0	0	0	0	0	0	0	0	0	0	0	0	0	0	0	0	0	0	0	0	0	0	0	0	0	0	0	0	0	0	0	0	0	0	0	0	0	0	0	0	0	0	0	0	0
748	0	0	0	0	0	0	0	0	0	0	0	0	0	0	0	0	0	0	0	0	0	0	0	0	0	0	0	0	0	0	0	0	0	0	0	0	0	0	0	0	0	0	0	0	0	0	0	0	5.15163
752	0	0	0	0	0	0	0	0	0	0	0	0	0	0	0	0	0	0	0	0	0	0	0	0	0	0	0	0	0	0	0	0	0	0	0	0	0	0	0	0	0	0	0	0	0	0	0	0	0.879912
756	0	0	0	0	0	0	0	0	0	0	0	0	0	0	0	0	0	0	0	0	0	0	0	0	0	0	0	0.682939	0.750354	0.819303	0.889787	0.961805	1.03536	1.11044	1.18707	1.26522	1.34491	1.42614	2.71809	4.0397	5.39097	6.77189	8.18247	9.6227	11.0926	12.5921	14.1213	15.6802	15.7462
760	0	0	0	0	0	0.00057845	1.49748	1.97534	1.94207	2.6218	3.27725	5.0092	7.57116	11.339	9.83066	8.46794	7.25371	6.18369	5.2493	10.2213	5.26843	5.90447	6.58118	7.29925	6.15126	6.93136	8.49226	8.94954	9.51872	10.0997	10.6926	11.2973	11.9138	12.5422	13.1824	13.8344	14.4983	15.1741	19.0852	23.0832	27.1679	31.3395	35.5979	39.943	44.375	48.8938	53.4994	58.1918	132.307
762	0	0	0	0	0	0	0	0	0	0	1.05884	1.24788	1.45322	1.67552	1.91533	2.17305	2.44889	2.74276	3.0542	3.31457	3.56951	3.81511	4.2153	4.59922	4.95624	5.27272	5.86562	6.35534	8.09528	9.87878	11.7058	13.5765	15.4906	17.4484	19.4496	21.4945	23.5829	25.7149	34.7991	44.0875	53.5802	63.2771	73.1782	83.2836	93.5931	104.107	114.825	125.747	155.233
764	0	0	0	0	0	0	0	0	0	0	0	0	0	0	0	0	0	0	0	0	0	0	0	0	0	0	0	0.640757	0.826783	1.01748	1.21285	1.41289	1.61759	1.82697	2.04102	2.25974	2.48313	2.7112	5.86053	9.08236	12.3767	15.7435	19.1828	22.6947	26.279	29.9358	33.6651	37.4669	234.653
768	0	0	0	0	0	0	0	0	0	0	0	0	0	0	0	0	0	0	0	0	0	0	0	0	0	0	0	0.33124	0.362926	0.395329	0.42845	0.462288	0.496844	0.532118	0.568109	0.604818	0.642244	0.680388	0.693514	0.706758	0.720121	0.733604	0.747206	0.760926	0.774766	0.788725	0.802803	0.817	0.82044
772	0	0	0	0	0	0	0	0	0	0	0	0	0	0	0	0	0	0	0	0	0	0	0	0	0	0	0	0	0	0	0	0	0	0	0	0	0	0	0	0	0	0	0	0	0	0	0	0	0
776	0	0	0	0	0	0	0	0	0	0	0	0	0	0	0	0	0	0	0	0	0	0	0	0	0	0	0	0	0	0	0	0	0	0	0	0	0	0	0	0	0	0	0	0	0	0	0	0	0
780	0	0	0	0	0	0	0	0	0	0	0	0	0	0	0	0	0	0	0	0	0	0	0	0	0	0	0	0	0	0	0	0	0	0	0	0	0	0	0	0	0	0	0	0	0	0	0	0	0.2703
784	0	0	0	0	0	0	0	0	0	0	0	0	0	0	0	0	0	0	0	0	0	0	0	0	0	0	0	1.12361	1.14888	1.17442	1.20023	1.22632	1.25267	1.27929	1.30619	1.33336	1.36079	1.3885	1.70939	2.03736	2.37242	2.71456	3.06378	3.42008	3.78347	4.15394	4.53149	4.91612	8.63575
788	0	0	0	0	0	0	0	0	0	0	4.69583	5.85585	7.13188	7.35862	7.51376	7.59899	7.61601	8.07097	10.1138	10.9123	11.7268	11.6376	12.7621	13.2628	11.0017	11.3841	14.6968	12.1217	13.5881	15.0888	16.6238	18.1932	19.7969	21.4349	23.1073	24.814	26.5551	28.3305	33.6808	39.1478	44.7314	50.4317	56.2487	62.1824	68.2328	74.3998	80.6835	87.0839	87.026
792	0	0	0	0.0413669	0.165468	1.30995	2.57572	4.08978	8.97993	14.3882	19.8184	23.7764	28.0282	28.2151	28.0047	27.4073	26.4345	30.6762	35.1212	40.5002	46.07	34.8448	42.3105	49.9336	40.973	44.6676	57.3319	60.2995	65.8401	71.5054	77.2953	83.2099	89.2491	95.4129	101.701	108.115	114.652	121.315	144.437	168.063	192.194	216.83	241.97	267.614	293.763	320.417	347.575	375.237	450.413
795	0	0	0	0	0	0	0	0	0	0	2.7794	3.30808	3.89325	4.53984	5.25314	6.03885	6.90308	7.85239	8.89378	9.65849	10.4435	11.6976	13.0088	14.3749	15.9381	18.0119	21.7252	24.8203	29.2384	33.764	38.3971	43.1378	47.986	52.9418	58.0052	63.1761	68.4546	73.8406	93.8734	114.352	135.276	156.646	178.462	200.723	223.43	246.582	270.181	294.224	387.778
796	0	0	0	0	0	0	0	0	0	0	0	0	0	0	0	0	0	0	0	0	0	0	0	0	0	0	0	0	0	0	0	0	0	0	0	0	0	0	0	0	0	0	0	0	0	0	0	0	0
798	0	0	0	0	0	0	0	0	0	0	0	0	0	0	0	0	0	0	0	0	0	0	0	0	0	0	0	0	0	0	0	0	0	0	0	0	0	0	0	0	0	0	0	0	0	0	0	0	0
800	0	0	0	0	0	0	0	0	0	0	0	0	0	0	0	0	0	0	0	0	0	0	0	0	0	0	0	0	0	0	0	0	0	0	0	0	0	0	0	0	0	0	0	0	0	0	0	0	0.205049
804	0	0	0	0	0	0	0	0	0	0	0	0	0	0	0	0	0	0	0	0	0	0	0	0	0	0	0	0.00435749	0.00508842	0.00583707	0.00660342	0.00738747	0.00818924	0.00900871	0.00984588	0.0107008	0.0115734	0.0124636	0.0303336	0.0486157	0.06731	0.0864164	0.105935	0.125866	0.146209	0.166964	0.188131	0.209711	56.433
807	0	0	0	0	0	0	0	0	0	0	0	0	0	0	0	0	0	0	0	0	0	0	0	0	0	0	0	0	0	0	0	0	0	0	0	0	0	0	0	0	0	0	0	0	0	0	0	0	0
818	0	0	0	0	3.45664	19.3897	105	140	170	202.5	250	296.176	345.882	399.118	455.882	516.176	580	647.353	718.235	792.647	870.588	952.059	1037.06	1125.59	1217.65	1313.24	1473.76	1642.83	1675.77	1709	1742.52	1776.33	1810.43	1844.83	1879.51	1914.49	1949.75	1985.3	2021.15	2057.29	2093.71	2130.43	2167.43	2204.73	2242.32	2280.2	2318.37	2356.83	2380.6
826	0	0	0	0	0	0	0	0	0	0	0	0	0	0	0	0	0	0	0	0	0	0	0	0	0	0	0	0	0	0	0	0	0	0	0	0	0	0	0	0	0	0	0	0	0	0	0	0	9.60925
834	0	0	0	0	0	0	0	0	0	0	0	0	0	0	0	0	0	0	0	0	0	0	0	0	0	0	0	0	0	0	0	0	0	0	0	0	0	0	0	0	0	0	0	0	0	0	0	0	3.18
840	0	0	0	0	0	0	0	0	0	0	0	0	0	0	0	0	0	0	2.01077	2.40741	2.837	3.24339	3.79737	4.34002	5.07875	5.83124	2.87442	3.79275	4.7271	5.68471	6.66558	7.6697	8.69709	9.74773	10.8216	11.9188	13.0392	14.1829	283.981	560.05	842.39	1131	1425.88	1727.03	2034.45	2348.14	2668.11	2994.34	4944.34
850	0	0	0	0	0	0	0	0	0	0	0	0	0	0	0	0	0	0	0	0	0	0	0	0	0	0	0	0	0	0	0	0	0	0	0	0	0	0	0	0	0	0	0	0	0	0	0	0	0
854	0	0	0	0	0	0	0	0	0	0	0	0	0	0	0	0	0	0	0	0	0	0	0	0	0	0	0	0.193322	0.211718	0.23053	0.249758	0.269402	0.289463	0.30994	0.330833	0.352143	0.373869	0.396011	0.403603	0.411263	0.418992	0.426788	0.434653	0.442586	0.450587	0.458657	0.466794	0.475	0.7155
858	0	0	0	0	0	0	0	0	0	0	0	0	0	0	0	0	0	0	0	0	0	0	0	0	0	0	0	0	0	0	0	0	0	0	0	0	0	0	0	0	0	0	0	0	0	0	0	0	2.44322
860	0	0	0	0	0	0	0	0	0	0	7.14155	8.58015	10.194	12.0011	14.0214	16.2764	18.7898	21.5875	24.6978	27.3829	30.2104	34.4234	38.916	43.6902	48.7481	54.5245	65.1524	76.5059	90.0822	103.989	118.226	132.794	147.692	162.92	178.479	194.368	210.588	227.138	288.786	351.807	416.198	481.961	549.096	617.602	687.48	758.729	831.35	905.343	1040.88
862	0	0	0	0	0	0	0	0	0	0	0	0	0	0	0	0	0	0	0	0	0	0	0	0	0	0	0	0.104581	0.106814	0.10907	0.111347	0.113647	0.115969	0.118312	0.120678	0.123066	0.125476	0.127908	0.14741	0.167331	0.18767	0.208427	0.229603	0.251198	0.273211	0.295643	0.318493	0.341762	28.886
876	0	0	0	0	0	0	0	0	0	0	0	0	0	0	0	0	0	0	0	0	0	0	0	0	0	0	0	0	0	0	0	0	0	0	0	0	0	0	0	0	0	0	0	0	0	0	0	0	0
882	0	0	0	0	0	0	0	0	0	0	0	0	0	0	0	0	0	0	0	0	0	0	0	0	0	0	0	0	0	0	0	0	0	0	0	0	0	0	0	0	0	0	0	0	0	0	0	0	0
887	0	0	0	0	0	0	0	0	0	0	0	0	0	0	0	0	0	0	0	0	0	0	0	0	0	0	0	13.3277	14.5013	15.7011	16.9271	18.1793	19.4577	20.7623	22.0932	23.4502	24.8334	26.2429	30.9597	35.7791	40.7009	45.7253	50.8521	56.0815	61.4134	66.8478	72.3848	78.0242	92.3256
891	0	0	0	0	0	0	0	0	0	0	0	0	0	0	0	0	0	0	0	0	0	0	0	0	0	0	0	0	0	0	0	0	0	0	0	0	0	0	0	0	0	0	0	0	0	0	0	0	0
894	0	0	0	0	0	0	0	0	0	0	0	0	0	0	0	0	0	0	0	0	0	0	0	0	0	0	0	0	0	0	0	0	0	0	0	0	0	0	0	0	0	0	0	0	0	0	0	0	0.318
[truncated: 29 more columns]

## Sheet: upper2grid
ISO1	y-10000	y-9000	y-8000	y-7000	y-6000	y-5000	y-4000	y-3000	y-2000	y-1000	y0	y100	y200	y300	y400	y500	y600	y700	y800	y900	y1000	y1100	y1200	y1300	y1400	y1500	y1600	y1700	y1710	y1720	y1730	y1740	y1750	y1760	y1770	y1780	y1790	y1800	y1810	y1820	y1830	y1840	y1850	y1860	y1870	y1880	y1890	y1900	y1910
4	0	0	0	0	0	0	0	0	0	0	13.7403	15.0136	16.1901	15.7003	15.2122	14.7259	14.2413	13.3453	12.4796	11.7718	11.0841	11.2447	11.3577	7.61526	7.79974	7.9354	9.43698	8.9519	13.9748	18.9155	23.774	28.5504	33.2446	37.8567	42.3865	46.8342	51.1998	55.4831	118.196	179.8	240.296	299.683	357.961	415.131	471.192	526.144	579.987	632.722	749.869
8	0	0	0	0	0	0	0	0	0	0	0	0	0	0	0	0	0	0	0	0	0	0	0	0	0	0	0	0.551995	0.597319	0.641841	0.685561	0.728479	0.770595	0.811908	0.852419	0.892127	0.931034	0.969138	1.79259	2.60145	3.39572	4.17539	4.94047	5.69095	6.42684	7.14813	7.85483	8.54693	15.951
12	0	0	0	0	0	0	0	0	0	0	68.6023	64.5613	60.7063	57.0304	53.527	50.1897	47.0122	43.9885	41.1127	42.6216	43.8404	40.6155	37.5506	31.552	26.0392	25.0936	35.485	25.9699	31.0174	35.9801	40.8581	45.6513	50.3598	54.9834	59.5224	63.9765	68.346	72.6306	85.579	98.2892	110.761	122.995	134.99	146.748	158.267	169.547	180.59	191.394	190.687
16	0	0	0	0	0	0	0	0	0	0	0	0	0	0	0	0	0	0	0	0	0	0	0	0	0	0	0	0	0	0	0	0	0	0	0	0	0	0	0	0	0	0	0	0	0	0	0	0	0
20	0	0	0	0	0	0	0	0	0	0	0	0	0	0	0	0	0	0	0	0	0	0	0	0	0	0	0	0	0	0	0	0	0	0	0	0	0	0	0	0	0	0	0	0	0	0	0	0	0
24	0	0	0	0	0	0	0	0	0	0	0	0	0	0	0	0	0	0	0	0	0	0	0	0	1.11176	1.24446	1.29438	1.34093	1.86785	2.3861	2.89568	3.39658	3.88882	4.37238	4.84727	5.31349	5.77104	6.21992	7.41956	8.59721	9.75286	10.8865	11.9982	13.0878	14.1555	15.2012	16.2249	17.2266	20.0211
28	0	0	0	0	0	0	0	0	0	0	0	0	0	0	0	0	0	0	0	0	0	0	0	0	0	0	0	0	0	0	0	0	0	0	0	0	0	0	0	0	0	0	0	0	0	0	0	0	0
31	0	0	0	0	0	0	0	0	0	0	16.783	17.738	18.7413	19.7947	20.9001	22.0594	23.2744	24.5471	25.8792	26.9024	27.8734	41.0886	53.8151	66.0472	51.8529	63.5755	74.7908	85.4932	93.5128	101.392	109.131	116.729	124.187	131.505	138.682	145.719	152.615	159.372	215.274	270.172	324.065	376.953	428.835	479.713	529.585	578.453	626.315	673.172	651.386
32	0	0	0	0	0	0	0	0	0	0	0	0	0	0	0	0	0	0	0	2.96059	3.31653	3.71375	4.15677	4.65058	5.20065	5.81297	6.49411	7.25122	13.5981	19.8416	25.9818	32.0188	37.9524	43.7827	49.5097	55.1334	60.6538	66.0709	144.447	221.438	297.043	371.264	444.099	515.55	585.615	654.295	721.59	787.5	784.199
36	0	0	0	0	0	0	0	0	0	0	0	0	0	0	0	0	0	0	0	0	0	0	0	0	0	0	0	0	0	0	0	0	0	0	0	0	0	0	2.49673	3.30495	4.09847	4.87731	5.64144	6.39089	7.12565	7.84571	8.55108	40.0696	142.976
40	0	0	0	0	0	0	0	0	0	0	0	0	0	0	0	0	0	0	0	0	0	0	0	0	0	0	0	0.327607	0.403911	0.478942	0.5527	0.625186	0.696398	0.766337	0.835004	0.902397	0.968518	1.03336	0	0	0	0	0	0	0	0	0	7.31218	0.130543
44	0	0	0	0	0	0	0	0	0	0	0	0	0	0	0	0	0	0	0	0	0	0	0	0	0	0	0	0	0	0	0	0	0	0	0	0	0	0	0	0	0	0	0	0	0	0	0	0	0
48	0	0	0	0	0	0	0	0	0	0	0	0	0	0	0	0	0	0	0	0	0	0	0	0	0	0	0	0.186787	0.212638	0.238048	0.263017	0.287544	0.311631	0.335276	0.358481	0.381244	0.403567	0.425448	0.547154	0.666659	0.783965	0.89907	1.01198	1.12268	1.23119	1.33749	1.4416	1.5435	1.45568
50	0	0	0	0	0	0	0	0	0	0	0	0	0	0	0	0	0	0	0	0	0	0	0	0	0	0	0	0	0	0	0	0	0	0	0	0	0	0	0	0	0	0	0	0	0	0	0	0	74.266
51	0	0	0	0	0	0	0	0	0	0	0	0	0	0	0	0	0	0	0	0	0	0	0	0	0	0	0	0.458033	0.562366	0.664957	0.765806	0.864913	0.962279	1.0579	1.15178	1.24392	1.33432	1.42298	2.84339	4.23866	5.60879	6.95379	8.27365	9.56838	10.838	12.0824	13.3017	14.4959	26.8252
52	0	0	0	0	0	0	0	0	0	0	0	0	0	0	0	0	0	0	0	0	0	0	0	0	0	0	0	0	0	0	0	0	0	0	0	0	0	0	0	0	0	0	0	0	0	0	0	0	0.174333
56	0	0	0	0	0	0	0	0	0	0	0	0	0	0	0	0	0	0	0	0	0	0	0	0	0	0	0	0.101362	0.117378	0.133122	0.148595	0.163797	0.178727	0.193386	0.207773	0.221889	0.235734	0.249307	0.463437	0.673773	0.880314	1.08306	1.28201	1.47717	1.66853	1.8561	2.03987	2.21985	1.84283
60	0	0	0	0	0	0	0	0	0	0	0	0	0	0	0	0	0	0	0	0	0	0	0	0	0	0	0	0	0	0	0	0	0	0	0	0	0	0	0	0	0	0	0	0	0	0	0	0	0
64	0	0	0	0	0	0	0	0	0	0	0	0	0	0	0	0	0	0	0	0	0	0	0	0	0	0	2.38512	2.64806	2.58024	2.51316	2.44684	2.38127	2.31645	2.25239	2.18907	2.12651	2.06471	2.00365	2.6996	3.38304	4.05397	4.71237	5.35827	5.99164	6.61251	7.22085	7.81668	8.4	8.368
68	0	0	0	0	0	0	0	0	0	0	0	0	0	0	0	0	0	0	0	0	0	0	0	0	0	0	0	0.700976	0.794876	0.887172	0.977863	1.06695	1.15443	1.2403	1.32458	1.40724	1.4883	1.56776	1.74071	1.91039	2.0768	2.23994	2.3998	2.55638	2.7097	2.85974	3.00651	3.15	15.167
70	0	0	0	0	0	0	0	0	0	0	0	0	0	0	0	0	0	0	0	0	0	0	0	0	0	0	0	0.113139	0.124557	0.135776	0.146797	0.157619	0.168242	0.178667	0.188893	0.19892	0.208748	0.218377	0.422831	0.623664	0.820876	1.01447	1.20444	1.39079	1.57353	1.75264	1.92813	2.1	1.74333
72	0	0	0	0	0	0	0	0	0	0	0	0	0	0	0	0	0	0	0	0	0	0	0	0	0	0	0	0	0	0	0	0	0	0	0	0	0	0	0	0	0	0	0	0	0	0	0	0	0.0751123
76	0	0	0	0	0	0	0	0	0	0	0	0	0	0	0	0	0	0	0	0	0	0	0	0	0	0	0	0.02	0.025916	0.031734	0.037454	0.043076	0.0486	0.054026	0.059354	0.064584	0.069716	0.07475	0.11229	0.14916	0.18536	0.22089	0.25575	0.28994	0.32346	0.35631	0.38849	0.42	85.772
84	0	0	0	0	0	0	0	0	0	0	0	0	0	0	0	0	0	0	0	0	0	0	0	0	0	0	0	0	0	0	0	0	0	0	0	0	0	0	0	0	0	0	0	0	0	0	0	0	0
86	0	0	0	0	0	0	0	0	0	0	0	0	0	0	0	0	0	0	0	0	0	0	0	0	0	0	0	0	0	0	0	0	0	0	0	0	0	0	0	0	0	0	0	0	0	0	0	0	0
90	0	0	0	0	0	0	0	0	0	0	0	0	0	0	0	0	0	0	0	0	0	0	0	0	0	0	0	0	0	0	0	0	0	0	0	0	0	0	0	0	0	0	0	0	0	0	0	0	0
92	0	0	0	0	0	0	0	0	0	0	0	0	0	0	0	0	0	0	0	0	0	0	0	0	0	0	0	0	0	0	0	0	0	0	0	0	0	0	0	0	0	0	0	0	0	0	0	0	0
96	0	0	0	0	0	0	0	0	0	0	0	0	0	0	0	0	0	0	0	0	0	0	0	0	0	0	0	0	0	0	0	0	0	0	0	0	0	0	0	0	0	0	0	0	0	0	0	0	0
100	0	0	0	0	0	0	0	0	0	0	0	0	0	0	0	0	0	0	0	0	0	0	0	0	0	0	0	2.09528	2.3222	2.54519	2.76425	2.97938	3.19058	3.39785	3.60119	3.8006	3.99608	4.18763	7.15609	10.0718	12.9349	15.7452	18.5028	21.2077	23.8598	26.4593	29.006	31.5	41.9319
104	0	0	0	0	0	0	0	0	0	2.31802	4.42969	4.79042	5.13625	5.46719	5.78326	6.08446	6.37078	6.64223	6.8988	7.14051	7.36734	9.02298	10.6042	10.0348	11.6811	13.2455	14.5662	15.8125	18.0358	20.2212	22.3687	24.4783	26.55	28.5838	30.5797	32.5377	34.4578	36.34	62.0046	87.2134	111.966	136.264	160.105	183.491	206.42	228.894	250.913	272.475	319.64
108	0	0	0	0	0	0	0	0	0	0	0	0	0	0	0	0	0	0	0	0	0	0	0	0	0	0	0	0	0	0	0	0	0	0	0	0	0	0	0	0	0	0	0	0	0	0	0	0	2.44067
112	0	0	0	0	0	0	0	0	0	0	0	0	0	0	0	0	0	0	0	0	0	0	0	0	0	0	0	0.161586	0.198393	0.234585	0.270163	0.305126	0.339475	0.373209	0.406329	0.438834	0.470724	0.502001	1.0031	1.49532	1.97868	2.45317	2.9188	3.37555	3.82344	4.26246	4.69261	5.1139	7.48787
116	0	0	0	0	0	0	0	0	0	0	0	0	0	0	0	0	0	0	0	0	0	0	0	0	0	0	0	0.738585	0.916978	1.0924	1.26485	1.43432	1.60082	1.76435	1.92491	2.0825	2.23711	2.38875	3.56314	4.71656	5.84901	6.9605	8.05101	9.12056	10.1691	11.1968	12.2034	13.1891	20.6468
120	0	0	0	0	0	0	0	0	0	0	0	0	0	0	0	0	0	0	0	0	0	0	0	0	0	0	0	0	0	0	0	0	0	0	0	0	0	0	0	0	0	0	0	0	0	0	0	0	0.348667
124	0	0	0	0	0	0	0	0	0	0	0	0	0	0	0	0	0	0	0	0	0	0	0	0	0	0	0	0	0	0	0	0	0	0	0	0	0	0	3.6936	7.3224	10.8864	14.3856	17.82	21.1896	24.4944	27.7344	30.9096	34.02	70.5979
132	0	0	0	0	0	0	0	0	0	0	0	0	0	0	0	0	0	0	0	0	0	0	0	0	0	0	0	0	0	0	0	0	0	0	0	0	0	0	0	0	0	0	0	0	0	0	0	0	0.228389
136	0	0	0	0	0	0	0	0	0	0	0	0	0	0	0	0	0	0	0	0	0	0	0	0	0	0	0	0	0	0	0	0	0	0	0	0	0	0	0	0	0	0	0	0	0	0	0	0	0
140	0	0	0	0	0	0	0	0	0	0	0	0	0	0	0	0	0	0	0	0	0	0	0	0	0	0	0	0	0	0	0	0	0	0	0	0	0	0	0	0	0	0	0	0	0	0	0	0	0
144	0	0	0	0	0	0	0	0	0	0	1.11995	1.26589	1.40028	1.52315	1.63449	1.73428	1.82251	1.8991	1.96397	2.01701	2.05803	2.20956	2.33667	2.15053	1.94906	1.97227	2.30724	2.57285	2.70988	2.84436	2.9763	3.1057	3.23256	3.35687	3.47865	3.59788	3.71457	3.82871	12.1927	20.4094	28.4787	36.4007	44.1754	51.8028	59.2829	66.6156	73.801	80.8391	112.073
148	0	0	0	0	0	0	0	0	0	0	0	0	0	0	0	0	0	0	0	0	0	0	0	0	0	0	0	0.309814	0.360148	0.40963	0.458261	0.506039	0.552966	0.599041	0.644264	0.688636	0.732155	0.774823	0.789939	0.804672	0.819021	0.832987	0.846569	0.859768	0.872584	0.885016	0.897065	0.908731	1.81054
152	0	0	0	0	0	0	0	0	0	0	43.3692	45.0105	46.6632	48.3197	49.9706	51.6049	53.2096	54.769	56.2644	57.6175	58.5928	61.2667	63.3143	64.7073	65.4059	65.3528	60.4339	55.4225	62.7134	69.8796	76.921	83.8377	90.6296	97.2968	103.839	110.257	116.55	122.718	160.558	197.715	234.189	269.981	305.091	339.517	373.261	406.323	438.702	470.399	391.872
156	0	0	0	0	0	0	63.1513	138.779	273.757	539.909	1592.5	1585.09	1577.02	1568.29	1558.9	1548.84	1538.12	1526.75	1514.71	1724	1730.42	1735.2	1738.34	1739.84	1739.71	2176.69	2192.01	2204.38	2451.53	2694.41	2933.03	3167.37	3397.44	3623.24	3844.77	4062.03	4275.02	4483.73	5231.59	5965.63	6685.87	7392.31	8084.95	8763.77	9428.8	10080	10717.4	11341.1	13117.7
158	0	0	0	0	0	0	0	0	0	0	0	0	0	0	0	0	0	0	0	0	0	0	2.20965	2.35992	2.46125	2.50761	2.26277	9.94701	12.4035	14.8191	17.1938	19.5276	21.8205	24.0725	26.2836	28.4538	30.583	32.6714	43.3191	53.7749	64.039	74.1113	83.9918	93.6805	103.177	112.483	121.596	130.518	162.272
162	0	0	0	0	0	0	0	0	0	0	0	0	0	0	0	0	0	0	0	0	0	0	0	0	0	0	0	0	0	0	0	0	0	0	0	0	0	0	0	0	0	0	0	0	0	0	0	0	0
166	0	0	0	0	0	0	0	0	0	0	0	0	0	0	0	0	0	0	0	0	0	0	0	0	0	0	0	0	0	0	0	0	0	0	0	0	0	0	0	0	0	0	0	0	0	0	0	0	0
170	0	0	0	0	0	0	0	0	0	0	0	0	0	0	0	0	0	3.01773	3.07226	3.21953	3.33551	3.5767	3.76519	3.89769	3.96942	8.56845	6.35173	4.75	4.96	5.166	5.368	5.566	5.76	5.95	6.136	6.318	6.496	6.67	7.0908	7.5032	7.9072	8.3028	8.69	9.0688	9.4392	9.8012	10.1548	10.5	48.116
174	0	0	0	0	0	0	0	0	0	0	0	0	0	0	0	0	0	0	0	0	0	0	0	0	0	0	0	0	0	0	0	0	0	0	0	0	0	0	0	0	0	0	0	0	0	0	0	0	0
175	0	0	0	0	0	0	0	0	0	0	0	0	0	0	0	0	0	0	0	0	0	0	0	0	0	0	0	0	0	0	0	0	0	0	0	0	0	0	0	0	0	0	0	0	0	0	0	0	0
178	0	0	0	0	0	0	0	0	0	0	0	0	0	0	0	0	0	0	0	0	0	0	0	0	0	0	0	0	0	0	0	0	0	0	0	0	0	0	0	0	0	0	0	0	0	0	0	0	0
180	0	0	0	0	0	0	0	0	0	0	0	0	0	0	0	0	0	0	0	0	0	0	0	0	0	0	0	0	0	0	0	0	0	0	0	0	0	0	0	0	0	0	0	0	0	0	0	0	0
184	0	0	0	0	0	0	0	0	0	0	0	0	0	0	0	0	0	0	0	0	0	0	0	0	0	0	0	0	0	0	0	0	0	0	0	0	0	0	0	0	0	0	0	0	0	0	0	0	0
188	0	0	0	0	0	0	0	0	0	0	0	0	0	0	0	0	0	0	0	0	0	0	0	0	0	0	0	0.244156	0.290729	0.336519	0.381527	0.425751	0.469193	0.511853	0.55373	0.594824	0.635135	0.674664	1.75377	2.81385	3.85489	4.87689	5.87987	6.8638	7.8287	8.77457	9.7014	10.6092	13.34
191	0	0	0	0	0	0	0	0	0	0	0	0	0	0	0	0	0	0	0	0	0	0	0	0	0	0	0	0.117533	0.128556	0.139387	0.150025	0.160469	0.170721	0.18078	0.190645	0.200318	0.209798	0.219085	0.423462	0.62422	0.821359	1.01488	1.20478	1.39106	1.57372	1.75277	1.92819	2.1	1.74333
192	0	0	0	0	0	0	0	0	0	0	0	0	0	0	0	0	0	0	0	0	0	0	0	0	0	0	0	0.121341	0.182329	0.242317	0.301305	0.359295	0.416285	0.472276	0.527267	0.581259	0.634252	0.686246	1.32311	1.9487	2.56302	3.16605	3.75781	4.33829	4.90749	5.46541	6.01206	6.54743	13.7697
196	0	0	0	0	0	0	0	0	0	0	0	0	0	0	0	0	0	0	0	0	0	0	0	0	0	0	0	1.44055	1.50093	1.56015	1.61821	1.67512	1.73086	1.78544	1.83887	1.89113	1.94224	1.99218	2.64993	3.29583	3.92989	4.5521	5.16247	5.761	6.34769	6.92253	7.48553	8.03668	10.527
203	0	0	0	0	0	0	0	0	0	0	0	0	0	0	0	0	0	0	0	0	0	0	0	0	0	0	0	0.222759	0.218401	0.214084	0.209809	0.205575	0.201383	0.197233	0.193124	0.189056	0.18503	0.181046	0.352148	0.520221	0.685265	0.847279	1.00626	1.16222	1.31515	1.46504	1.61191	1.75575	1.45755
204	0	0	0	0	0	0	0	0	0	0	0	0	0	0	0	0	0	0	0	0	0	0	0	0	0	0	0	0	0	0	0	0	0	0	0	0	0	0	0	0	0	0	0	0	0	0	0	0	0
208	0	0	0	0	0	0	0	0	0	0	0	0	0	0	0	0	0	0	0	0	0	0	0	0	0	0	0	0.253055	0.269727	0.286097	0.302165	0.317932	0.333397	0.348561	0.363423	0.377984	0.392243	0.406201	0.880741	1.34689	1.80466	2.25404	2.69503	3.12763	3.55185	3.96768	4.37512	4.77417	7.13398
212	0	0	0	0	0	0	0	0	0	0	0	0	0	0	0	0	0	0	0	0	0	0	0	0	0	0	0	0	0	0	0	0	0	0	0	0	0	0	0	0	0	0	0	0	0	0	0	0	0
214	0	0	0	0	0	0	0	0	0	0	0	0	0	0	0	0	0	0	0	0	0	0	0	0	0	0	0	0.0463767	0.0509072	0.0553587	0.0597311	0.0640244	0.0682387	0.0723739	0.0764301	0.0804072	0.0843053	0.0881243	0.188785	0.287667	0.384769	0.480092	0.573635	0.665399	0.755383	0.843588	0.930014	1.01466	19.3736
218	0	0	0	0	0	0	0	0	0	0	0	0	0	0	0	0	0	0	0	0	0	0	0	0	0	0	0	0.232527	0.229665	0.22682	0.22399	0.221177	0.21838	0.2156	0.212835	0.210087	0.207354	0.204638	0.21546	0.22606	0.23644	0.246599	0.256536	0.266252	0.275748	0.285022	0.294075	0.302907	55.5728
222	0	0	0	0	0	0	0	0	0	0	0	0	0	0	0	0	0	0	0	0	0	0	0	0	0	0	0	0.0189956	0.0228086	0.0265577	0.0302428	0.033864	0.0374213	0.0409145	0.0443439	0.0477092	0.0510107	0.0542481	0.120547	0.185675	0.249632	0.312417	0.374031	0.434473	0.493744	0.551843	0.608771	0.664528	2.53765
226	0	0	0	0	0	0	0	0	0	0	0	0	0	0	0	0	0	0	0	0	0	0	0	0	0	0	0	0	0	0	0	0	0	0	0	0	0	0	0	0	0	0	0	0	0	0	0	0	0
231	0	0	0	0	0	0	0	0	0	0	0	0	0	0	0	0	0	2.88911	3.46429	3.39605	3.32784	3.25968	3.19155	3.12346	3.05541	2.9874	2.91942	2.85149	3.14778	3.43893	3.72493	4.00578	4.28149	4.55205	4.81746	5.07773	5.33285	5.58282	7.26085	8.90858	10.526	12.1132	13.67	15.1966	16.6929	18.1589	19.5946	21	41.8176
232	0	0	0	0	0	0	0	0	0	0	0	0	0	0	0	0	0	0	0	0	0	0	0	0	0	0	0	0.298816	0.34257	0.38558	0.427845	0.469366	0.510143	0.550176	0.589464	0.628009	0.665808	0.702864	0.733922	0.764328	0.794082	0.823184	0.851634	0.879432	0.906577	0.933071	0.958912	0.984101	1.92025
233	0	0	0	0	0	0	0	0	0	0	0	0	0	0	0	0	0	0	0	0	0	0	0	0	0	0	0	0	0	0	0	0	0	0	0	0	0	0	0	0	0	0	0	0	0	0	0	0	0.147728
234	0	0	0	0	0	0	0	0	0	0	0	0	0	0	0	0	0	0	0	0	0	0	0	0	0	0	0	0	0	0	0	0	0	0	0	0	0	0	0	0	0	0	0	0	0	0	0	0	0
238	0	0	0	0	0	0	0	0	0	0	0	0	0	0	0	0	0	0	0	0	0	0	0	0	0	0	0	0	0	0	0	0	0	0	0	0	0	0	0	0	0	0	0	0	0	0	0	0	0
242	0	0	0	0	0	0	0	0	0	0	0	0	0	0	0	0	0	0	0	0	0	0	0	0	0	0	0	0	0	0	0	0	0	0	0	0	0	0	0	0	0	0	0	0	0	0	0	0	0.174333
246	0	0	0	0	0	0	0	0	0	0	0	0	0	0	0	0	0	0	0	0	0	0	0	0	0	0	0	0	0	0	0	0	0	0	0	0	0	0	0	0	0	0	0	0	0	0	0	0	0
250	0	0	0	0	0	0	0	0	0	0	9.07388	10.1628	11.1678	9.6018	8.10792	7.46945	6.85407	6.99486	7.10797	7.87459	8.55907	9.78771	12.6793	18.4277	12.0452	15.4875	17.8675	19.6822	20.9925	22.279	23.5419	24.7811	25.9967	27.1885	28.3567	29.5013	30.6221	31.7193	51.0991	70.1341	88.8243	107.17	125.17	142.826	160.137	177.103	193.724	210	225.525
254	0	0	0	0	0	0	0	0	0	0	0	0	0	0	0	0	0	0	0	0	0	0	0	0	0	0	0	0	0	0	0	0	0	0	0	0	0	0	0	0	0	0	0	0	0	0	0	0	0.173275
258	0	0	0	0	0	0	0	0	0	0	0	0	0	0	0	0	0	0	0	0	0	0	0	0	0	0	0	0	0	0	0	0	0	0	0	0	0	0	0	0	0	0	0	0	0	0	0	0	0
262	0	0	0	0	0	0	0	0	0	0	0	0	0	0	0	0	0	0	0	0	0	0	0	0	0	0	0	0	0	0	0	0	0	0	0	0	0	0	0	0	0	0	0	0	0	0	0	0	0.0668393
266	0	0	0	0	0	0	0	0	0	0	0	0	0	0	0	0	0	0	0	0	0	0	0	0	0	0	0	0	0	0	0	0	0	0	0	0	0	0	0	0	0	0	0	0	0	0	0	0	0.697333
268	0	0	0	0	0	0	0	0	0	0	1.70589	1.76597	1.82586	1.88519	1.94349	2.00021	2.05467	2.10608	2.15348	2.16481	2.16273	3.06443	3.84061	4.48848	3.32412	3.81048	4.11754	4.21723	4.59444	4.96503	5.32898	5.68631	6.03701	6.38108	6.71852	7.04933	7.37352	7.69108	10.3713	13.0033	15.5872	18.1228	20.6103	23.0495	25.4406	27.7835	30.0781	32.3246	38.8789
270	0	0	0	0	0	0	0	0	0	0	0	0	0	0	0	0	0	0	0	0	0	0	0	0	0	0	0	1.33302	1.27344	1.21464	1.15663	1.09941	1.04298	0.98734	0.932488	0.878425	0.825151	0.772666	0.763619	0.754614	0.745649	0.736725	0.727842	0.719	0.710198	0.701438	0.692718	0.684039	0.681433
275	0	0	0	0	0	0	0	0	0	0	0	0	0	0	0	0	0	0	0	0	0	0	0	0	0	0	0	0.0934777	0.118757	0.143616	0.168055	0.192075	0.215675	0.238855	0.261615	0.283955	0.305876	0.327377	0.400603	0.472494	0.543051	0.612273	0.68016	0.746713	0.811931	0.875815	0.938364	0.999578	3.36143
276	0	0	0	0	0	0	0	0	0	0	0	0	0	0	0	0	0	0	0	0	1.99021	3.12001	4.96547	5.98269	3.10995	3.93619	4.19753	3.75928	4.27444	4.78081	5.27838	5.76716	6.24714	6.71833	7.18072	7.63432	8.07913	8.51514	17.857	27.0336	36.0451	44.8914	53.5725	62.0883	70.439	78.6246	86.6449	94.5	103.905
288	0	0	0	0	0	0	0	0	0	0	0	0	0	0	0	0	0	0	0	0	0	0	0	0	0	0	0	1.57861	1.63395	1.6882	1.74135	1.7934	1.84436	1.89422	1.94299	1.99066	2.03723	2.0827	2.07454	2.0662	2.05769	2.049	2.04014	2.03111	2.0219	2.01251	2.00295	1.99322	2.6475
292	0	0	0	0	0	0	0	0	0	0	0	0	0	0	0	0	0	0	0	0	0	0	0	0	0	0	0	0	0	0	0	0	0	0	0	0	0	0	0	0	0	0	0	0	0	0	0	0	0
296	0	0	0	0	0	0	0	0	0	0	0	0	0	0	0	0	0	0	0	0	0	0	0	0	0	0	0	0	0	0	0	0	0	0	0	0	0	0	0	0	0	0	0	0	0	0	0	0	0
300	0	0	0	0	0	0	0	0	0	0	7.9711	7.83713	7.70316	6.62304	5.57642	4.19822	2.86692	2.98916	3.10471	3.21356	3.31571	3.50862	3.72264	3.89344	2.74299	2.98079	4.37071	4.27023	4.66254	5.04797	5.42652	5.79819	6.16299	6.5209	6.87194	7.2161	7.55338	7.88378	15.9352	23.8441	31.6106	39.2346	46.7162	54.0553	61.252	68.3062	75.218	81.9873	126.596
304	0	0	0	0	0	0	0	0	0	0	0	0	0	0	0	0	0	0	0	0	0	0	0	0	0	0	0	0	0	0	0	0	0	0	0	0	0	0	0	0	0	0	0	0	0	0	0	0	0
308	0	0	0	0	0	0	0	0	0	0	0	0	0	0	0	0	0	0	0	0	0	0	0	0	0	0	0	0	0	0	0	0	0	0	0	0	0	0	0	0	0	0	0	0	0	0	0	0	0
312	0	0	0	0	0	0	0	0	0	0	0	0	0	0	0	0	0	0	0	0	0	0	0	0	0	0	0	0	0	0	0	0	0	0	0	0	0	0	0	0	0	0	0	0	0	0	0	0	0.0941426
316	0	0	0	0	0	0	0	0	0	0	0	0	0	0	0	0	0	0	0	0	0	0	0	0	0	0	0	0	0	0	0	0	0	0	0	0	0	0	0	0	0	0	0	0	0	0	0	0	0
320	0	0	0	0	0	0	0	0	0	0	0	0	0	0	0	0	0	0	2.30863	3.3016	4.18453	4.22795	4.2371	4.20947	4.14145	4.02761	2.75673	2.88039	2.91557	2.94982	2.98313	3.0155	3.04693	3.07742	3.10697	3.13558	3.16325	3.18999	4.79793	6.37718	7.92773	9.44959	10.9427	12.4072	13.843	15.25	16.6284	17.9781	20.5033
324	0	0	0	0	0	0	0	0	0	0	0	0	0	0	0	0	0	0	0	0	0	2.68232	2.98635	3.32308	3.69573	4.10781	4.5631	5.06567	5.12467	5.18206	5.23784	5.29202	5.34459	5.39556	5.44493	5.49269	5.53884	5.58339	5.55135	5.51903	5.48641	5.45351	5.42032	5.38683	5.35306	5.319	5.28464	5.25	7.845
328	0	0	0	0	0	0	0	0	0	0	0	2.97341	3.59833	4.35015	5.25323	6.33618	7.63237	9.18052	11.0252	13.2172	15.8137	16.6127	17.2635	19.1289	20.6911	21.9391	20.572	21.2439	22.1757	23.0897	23.9859	24.8644	25.725	26.568	27.3931	28.2005	28.9901	29.762	29.7825	29.7981	29.8088	29.8146	29.8155	29.8115	29.8026	29.7888	29.7701	29.7465	40.3843
332	0	0	0	0	0	0	0	0	0	0	0	0	0	0	0	0	0	0	0	0	0	0	0	0	0	0	0	0.0501495	0.108495	0.165893	0.222344	0.277847	0.332403	0.386011	0.438671	0.490384	0.54115	0.590968	1.09821	1.59646	2.08572	2.566	3.03728	3.49958	3.95289	4.3972	4.83253	5.25887	8.73139
334	0	0	0	0	0	0	0	0	0	0	0	0	0	0	0	0	0	0	0	0	0	0	0	0	0	0	0	0	0	0	0	0	0	0	0	0	0	0	0	0	0	0	0	0	0	0	0	0	0
336	0	0	0	0	0	0	0	0	0	0	0	0	0	0	0	0	0	0	0	0	0	0	0	0	0	0	0	0	0	0	0	0	0	0	0	0	0	0	0	0	0	0	0	0	0	0	0	0	0
[truncated: 141 more rows]
[truncated: 29 more columns]

## Sheet: for paper
Regional actual irrigated area estimates (million ha)
[truncated: 19 more rows]
