# Supplementary material for: New anthropogenic land use estimates for the Holocene; HYDE 3.2
Source: Copernicus journal article supplement (doi:10.5194/essd-2016-58), 2016-12-07
Supplement: Supplementary file 13 [file Table S6.xlsx]

## Sheet: Note
Total Grazing land estimates
Sheetname
data	= baseline (or best estimate) data
lower	= baseline data * first lower uncertainty ratio estimate
upper	= baseline data * first upper uncertainty ratio estimate
lower2	= baseline data * second lower uncertainty ratio estimate
upper2	= baseline data * upper lower uncertainty ratio estimate
2grid	= for export of baseline data to .csv file for computional grid
lower2grid	= for export of lower estimate to .csv file for computional grid
upper2grid	= for export of upper estimate to .csv file for computional grid
for paper	= HYDE 3.2 results and literature estimates

## Sheet: data
Total grazing land estimate, in 1000 ha				Let op, before 1500 no pasture in the Americas !								= based on sub-national data							Wsurplus gebruiken voor pasture distribution ? See Australia																			0
			53	52	51	50	49	48	47	46	45	44	43	42	41	40	39	38	37	36	35	34	33	32	31	30	29	28	27	26	25	24	23	22	21	20	19	18	17	16	15	14	13	12	11	10	9	8	7
IM22	ISO1	Country	-10000	-9000	-8000	-7000	-6000	-5000	-4000	-3000	-2000	-1000	0	100	200	300	400	500	600	700	800	900	1000	1100	1200	1300	1400	1500	1600	1700	1710	1720	1730	1740	1750	1760	1770	1780	1790	1800	1810	1820	1830	1840	1850	1860	1870	1880	1890
18	4	Afghanistan	0	0	0	0	0.0790221	0.21883	1.78712	6.27314	17.9441	46.6838	186.735	420.154	933.677	1867.35	3734.71	7469.41	7492.94	7290.83	7087.18	6957.64	6827.04	7228	7631.1	5357.55	5757.04	6158.67	7720.49	7742.52	7935.62	8118.28	8305.14	8496.29	8691.85	8891.9	9096.55	9305.92	9520.1	9739.2	9963.35	10192.7	10533.8	11122.1	11743.3	12399.1	13091.7	14028.5	15201.8
12	8	Albania	0	0	0	0	0	0	5.84274	11.6855	23.371	46.7419	78.4261	82.6364	87.0728	91.7473	96.6728	101.863	107.331	206.282	347.457	477.983	507.003	645.277	510.844	376.412	434.321	313.676	255.422	372.275	356.873	339.303	319.566	297.66	273.586	270.052	265.757	260.701	254.885	248.307	251.641	254.786	255.486	267.081	279.143	303.345	326.697	354.535	381.358
7	12	Algeria	0	0	0	0	0	0	485.199	970.398	1940.8	3881.59	6699.74	6586.94	6475.84	6366.4	6258.62	6152.48	6047.96	5945.03	5843.69	6378.82	6916.98	6764.37	6610.6	5879.9	5144.69	5264.94	7920.17	6177.74	6455.8	6734.02	7012.4	7290.93	7569.62	7848.47	8127.47	8406.62	8685.93	8965.39	9245.01	9524.78	11180.2	12836.5	14493.8	16152	17811.1	19471.1	21132.1
24	16	American Samoa	0	0	0	0	0	0	0	0	0	0	0	0	0	0	0	0	0	0	0	0	0	0	0	0	0	0	0	0	0	0	0	0	0	0	0	0	0	0	0	0	0	0	0	0	0	0	0
11	20	Andorra	0	0	0	0	0	0	0.126863	0.253727	0.507454	1.01491	2.14945	2.20044	2.25257	2.30586	2.36034	2.41604	2.47298	2.53119	2.59069	2.65153	2.71372	2.77729	2.84228	2.90872	2.97663	3.04606	3.11703	3.18957	3.35838	3.53613	3.72328	3.92033	4.12781	4.34627	4.5763	4.81849	5.0735	5.34201	5.62473	5.9224	6.23583	6.56585	6.91332	7.27919	7.66442	8.07003	8.4971
10	24	Angola	0	0	0	0	0	0	0	0	3.05759	6.11517	19.5396	28.1787	40.7678	59.1865	86.2526	126.217	185.539	274.111	407.218	593.496	824.617	1094.6	1436.07	1873.69	2565.48	3489.29	4485.92	23218.3	11904.7	12960.1	14051.1	15181.2	16354.2	17574.9	18848.6	20181.7	21581.6	23057.7	24620.8	26284.9	28067.1	27784.9	27535.1	27327.8	27177.4	27104.8	27142.5
4	28	Antigua & Barb.	0	0	0	0	0	0	0	0	0	0	0	0	0	0	0	0	0	0	0	0	0	0	0	0	0	0	1.2008	1.17963	1.29361	1.41788	1.55322	1.70046	1.86045	2.03402	2.22202	2.42527	2.64454	2.88049	3.13365	3.40432	3.69248	3.99768	4.05093	3.78885	3.5322	3.35661	3.37865
16	31	Azerbaijan	0	0	0	0	0	0	0	0	55.4262	110.852	258.656	554.262	583.026	612.624	642.947	673.848	705.132	736.54	767.734	787.435	802.916	1161.12	1485.83	1772.23	1342.5	1572.07	1739.25	1821.98	1171.77	1252.41	1337.85	1428.23	1523.68	1624.31	1730.18	1841.28	1957.55	2078.81	2204.79	2335.04	2468.9	2605.45	2743.4	2880.99	3015.81	3144.52	3262.48
6	32	Argentina	0	0	0	0	0	0	0	0	0	0	0	0	0	0	0	0	0	0	0	0	0	0	0	0	0	0	275.194	306.261	340.849	379.361	422.242	469.993	523.169	582.389	648.345	721.808	803.637	894.79	1384.92	1970.56	2804.01	3990.21	5678.55	8081.76	12002.9	17569	24280.4
24	36	Australia	0	0	0	0	0	0	0	0	0	0	0	0	0	0	0	0	0	0	0	0	0	0	0	0	0	0	0	0	0	0	0	0	0	0	0	0	2746.01	5493.82	7426.26	8864.39	9912.06	10728.3	12472.8	18469.5	29506.1	42502.3	65434.8
11	40	Austria	0	0	0	0	0	0	4.23819	8.47637	16.9527	33.9055	169.527	186.48	203.433	186.48	169.527	152.575	135.622	152.575	169.527	203.433	237.338	305.149	423.819	678.11	423.819	678.11	712.015	1467.18	1520.39	1575.54	1632.68	1691.9	1753.26	1816.85	1882.75	1951.03	2021.79	2095.12	2171.11	2249.86	2331.46	2416.02	2503.65	2511.18	2518.74	2526.32	2533.92
4	44	Bahamas	0	0	0	0	0	0	0	0	0	0	0	0	0	0	0	0	0	0	0	0	0	0	0	0	0	0	0.516852	0.845757	0.95963	1.0877	1.23166	1.3934	1.575	1.77883	2.00748	2.26387	2.55123	2.87318	3.23374	3.42303	3.62135	3.46512	3.29446	3.10858	3.21471	3.28773	3.31601
17	48	Bahrain	0	0	0	0	0	0	0	0	0.466445	0.93289	1.21978	1.33188	1.45288	1.58317	1.72306	1.87274	2.03224	2.20135	2.37954	2.56577	2.75838	2.95471	3.15074	3.34036	3.51422	3.65763	3.74638	3.73687	3.87306	4.01211	4.15378	4.29777	4.44373	4.59123	4.73973	4.88859	5.03702	5.18408	5.32861	5.4759	5.61789	5.75244	5.87692	5.98797	6.08917	6.16739	6.21519
18	50	Bangladesh	0	0	0	0	0	0	0.178184	0.593948	3.29971	6.59942	21.9981	47.2311	50.4661	54.3482	58.2302	62.1122	65.9942	73.1112	80.2282	89.9333	99.6383	103.52	107.402	107.402	121.636	129.4	168.22	207.041	212.546	216.883	221.31	225.826	230.435	235.138	239.936	244.833	249.83	254.928	260.131	269.101	278.38	287.979	277.975	292.605	308.005	324.216	341.28
16	51	Armenia	0	0	0	0	0	0	0	0	1.91408	3.82816	8.93237	19.1408	20.441	21.8288	23.3101	24.8911	26.5783	28.379	30.3005	31.9362	33.5589	50.1579	66.6351	83.1797	66.1454	82.5616	98.4724	116.025	122.084	128.46	135.169	142.228	149.655	157.471	165.694	174.347	183.452	193.032	203.112	213.719	224.879	236.622	248.978	261.979	275.659	290.053	305.199
4	52	Barbados	0	0	0	0	0	0	0	0	0	0	0	0	0	0	0	0	0	0	0	0	0	0	0	0	0	0	0.295998	1.16078	1.13802	1.1157	1.09383	1.07238	1.05135	1.03074	1.01053	0.990711	0.971285	0.952241	1.0736	1.18984	1.30111	1.40756	1.50933	1.56429	1.61652	1.66609	1.7131
11	56	Belgium	0	0	0	0	0	0	8.44831	16.8966	33.7933	67.5865	204.179	204.025	203.871	203.717	203.563	195.734	112.923	289.084	521.185	836.47	1014.01	1935.83	2298.8	2352.57	1737.28	1960.48	1915.67	2171.61	2195.36	2187.65	2148.46	2077.8	1975.67	2011.18	2035.65	2049.07	2051.45	2042.78	2020.97	1987.91	2020.07	1898.25	1884.66	1860.66	1809.35	1811.82	1786.21
4	60	Bermuda	0	0	0	0	0	0	0	0	0	0	0	0	0	0	0	0	0	0	0	0	0	0	0	0	0	0	0.127346	0.208384	0.239255	0.274415	0.314433	0.359957	0.411716	0.470533	0.537337	0.613177	0.699237	0.796851	0.907525	1.03296	1.17505	1.2253	1.2722	1.3144	1.35027	1.37789	1.39497
18	64	Bhutan	0	0	0	0	0	0	0	0.0793746	0.158749	0.317499	0.409425	0.615958	0.926651	1.39402	2.09707	3.15461	4.74535	7.13805	10.7369	10.7667	10.7962	10.8256	10.8548	11.9723	13.0954	16.4124	21.9404	27.4966	30.0409	30.6051	31.1799	31.7655	32.362	32.9698	33.589	34.2198	34.8624	35.5171	36.1841	39.3406	42.7725	46.5037	50.5604	54.971	61.0945	67.9	75.4637
6	68	Bolivia	0	0	0	0	0	0	0	0	0	0	0	0	0	0	0	0	0	0	0	0	0	0	0	0	0	0	3388.6	6777.2	6908.26	7041.85	7178.02	7316.82	7458.3	7602.52	7749.53	7899.37	8052.11	8207.81	8366.51	9936.07	11800.1	11953.5	12106.9	14458.9	12435.2	10410.4	16985.9
12	70	Bsnia.&Hrzgvna.	0	0	0	0	0	0	0	19.4751	38.9502	77.9004	124.124	125.992	128.002	130.043	132.118	134.225	136.366	138.541	140.75	142.995	145.276	153.626	161.982	170.342	178.708	187.08	228.725	228.798	242.502	252.408	262.719	273.451	284.621	296.247	308.349	320.945	334.055	347.701	361.904	383.85	407.127	431.814	458	485.772	538.305	596.519	661.029
10	72	Botswana	0	0	0	0	0	0	0	0	0.0551451	0.11029	0.22058	0.441161	0.882322	1.76464	3.52929	7.05857	14.1171	28.2343	56.4686	112.937	225.874	276.031	340.345	423.958	534.418	683.113	887.794	4661.24	5133.34	5590.77	6064.09	6554.81	7064.73	7595.91	8150.77	8732.17	9343.51	9988.91	10673.4	11403.1	12185.9	12073.7	11976.4	11898.5	11846.7	11830.5	11864.7
5	76	Brazil	0	0	0	0	0	0	0	0	0	0	0	0	0	0	0	0	0	0	0	0	0	0	0	0	0	0	275.905	551.81	603.273	660.342	723.804	794.593	873.826	962.842	1063.26	1177.06	1306.65	1629.75	1993.44	2411.58	2850.21	3639.85	4664.83	6002.21	7758.71	10086.2	13204.8
4	84	Belize	0	0	0	0	0	0	0	0	0	0	0	0	0	0	0	0	0	0	0	0	0	0	0	0	0	0	5.11099	5.4663	5.79839	6.15066	6.52432	6.92069	7.34113	7.78712	8.26021	8.76204	9.29435	9.859	10.458	10.5947	10.7332	10.8735	11.0156	11.1596	12.3084	13.5754	14.9729
18	86	British Indian Ocean Territory	0	0	0	0	0	0	0	0	0	0	0	0	0	0	0	0	0	0	0	0	0	0	0	0	0	0	0	0	0	0	0	0	0	0	0	0	0	0	0	0	0	0	0	0	0	0	0
24	90	Solomon Islands	0	0	0	0	0	0	0	0	0.000166806	0.000333611	0.000364395	0.00053735	0.000791666	0.00116515	0.00171286	0.00251479	0.00368671	0.00539561	0.00788116	0.0114852	0.0166916	0.0241777	0.0348782	0.0500543	0.0713486	0.100767	0.14043	0.191642	0.236905	0.292745	0.3616	0.446452	0.550953	0.679566	0.837735	1.0321	1.27071	1.56336	1.92188	1.99335	2.06546	2.13785	2.21006	2.28153	2.30462	2.32367	2.33787
4	92	Br.Virgin Is.	0	0	0	0	0	0	0	0	0	0	0	0	0	0	0	0	0	0	0	0	0	0	0	0	0	0	0.947033	1.85693	1.96974	2.08941	2.21634	2.35099	2.49382	2.64532	2.80603	2.9765	3.15733	3.34915	3.55262	3.59906	3.6461	3.69376	3.74205	3.79096	3.84479	3.89938	3.95475
21	96	Brunei Dar El Salaam	0	0	0	0	0	0	0	0	0.00393443	0.00786885	0.00859494	0.0126744	0.0186729	0.0274823	0.0404012	0.059316	0.0869579	0.127266	0.185892	0.1806	0.174979	0.202765	0.325005	0.342041	0.354584	0.278215	0.323102	0.352745	0.361991	0.390384	0.420832	0.453455	0.488374	0.525712	0.56559	0.608126	0.653429	0.701601	0.752725	0.778554	0.804484	0.830372	0.85604	0.881275	0.878083	0.873297	0.907218
12	100	Bulgaria	0	0	0	0	0	0	0	46.0817	92.1634	184.327	340.201	425.251	503.255	438.534	378.046	321.563	268.865	516.222	868.642	1553.44	2028.01	2806.95	2375.43	1882.06	1194.38	1254.71	1596.39	673.522	697.95	723.264	749.497	776.68	804.85	834.042	864.292	895.639	928.124	961.786	996.67	1032.82	1070.28	1109.1	1149.32	1152.78	1156.25	1159.73	1163.22
21	104	Myanmar	0	0	0	0	0	0	5.91469	6.18471	32.4563	64.9126	110.14	119.105	127.618	135.651	143.172	150.144	156.524	162.264	167.303	171.57	174.979	211.214	243.753	225.436	254.858	278.215	290.792	21.8951	23.4172	25.0451	26.7862	28.6484	30.64	32.77	35.0482	37.4847	40.0905	42.8776	45.8584	49.0464	52.456	56.1027	60.0029	66.6699	74.0777	82.3085	91.4539
9	108	Burundi	0	0	0	0	0	0	0	0	1.32956	2.65913	3.23907	4.66194	6.70753	9.64715	13.8696	19.9318	28.6306	41.1058	58.9855	72.6976	85.9598	102.983	119.374	135.102	150.127	164.409	177.253	189.278	191.916	193.749	195.697	197.772	199.989	202.365	204.918	207.673	210.658	213.905	217.458	221.366	225.695	230.528	235.972	242.173	249.331	257.73	267.794
14	112	Belarus	0	0	0	0	0	0	0	0	11.1327	22.2654	51.9525	116.893	127.564	137.676	147.191	144.063	140.793	148.81	156.045	162.421	167.843	243.096	350.642	335.422	318.679	399.951	464.276	562.781	657.55	704.127	753.688	806.373	862.324	921.673	984.547	1051.06	1121.31	1195.37	1273.28	1355.04	1440.61	1529.85	1622.57	1718.43	1816.94	1917.44	2018.97
21	116	Cambodia	0	0	0	0	0	0	16.1531	22.4862	21.0145	42.0289	55.0305	58.2297	61.5582	65.0103	68.5772	72.2461	75.9991	79.8118	83.6514	85.7851	87.4894	92.934	97.5014	101.058	103.42	104.331	107.593	107.587	107.658	107.672	107.628	107.523	107.352	107.114	106.804	106.417	105.95	105.396	104.751	104.006	104.041	104.448	104.729	104.864	33.5266	44.7026	59.8695
8	120	Cameroon	0	0	0	0	0	0	0	230.986	331.222	468.738	647.463	732.248	827.657	934.892	1055.25	1190.13	1340.98	1509.32	1696.65	1904.38	2133.73	2385.48	2659.69	2955.09	3268.07	3590.86	3907.51	4184.36	4119.77	4125.81	4132.17	4138.87	4145.95	4153.46	4161.45	4169.99	4179.14	4189	4199.68	4211.32	4224.11	4238.27	4254.12	4272.08	4292.72	4316.93	4346
1	124	Canada	0	0	0	0	0	0	0	0	0	0	0	0	0	0	0	0	0	0	0	0	0	0	0	0	0	0	0	0	0	0	0	0	0	0	40.9169	61.3753	92.063	138.095	225.502	338.253	507.38	761.07	1141.61	1712.41	2574.71	3137.2	4012.63
8	132	Cape Verde	0	0	0	0	0	0	0	0	0	0	0	0	0	0	0	0	0	0	0	0	0	0	0	0	0	0	1.79302	3.3588	3.56812	3.83667	4.12472	4.4336	4.76471	5.11954	5.49966	5.90671	6.34242	6.80863	7.30723	7.84022	8.40967	9.01773	9.66663	10.3586	11.0961	11.8814	12.7169
4	136	Cayman Islands	0	0	0	0	0	0	0	0	0	0	0	0	0	0	0	0	0	0	0	0	0	0	0	0	0	0	0.725473	0.775907	0.823045	0.873046	0.926086	0.982348	1.04203	1.10533	1.17248	1.24372	1.31927	1.39942	1.48444	1.50384	1.5235	1.54342	1.56359	1.58403	1.60652	1.62933	1.65247
8	140	Central African Rep.	0	0	0	0	0	0	104.437	148.53	209.105	290.011	392.567	408.199	424.255	440.72	457.574	474.791	492.337	510.171	528.241	546.481	564.813	583.139	601.342	619.275	636.76	653.578	669.455	684.05	684.198	692.137	700.599	709.64	719.33	729.746	740.985	753.157	766.396	780.868	796.772	814.361	833.952	855.957	880.914	909.552	942.883	982.365	1030.19
18	144	Sri Lanka	0	0	0	0	0	0	0	0	10.5723	21.1446	23.0733	26.4596	29.6958	32.7728	35.6802	38.4062	40.9369	43.2563	45.345	47.18	48.7329	52.9077	56.4899	52.3701	47.6475	48.1445	55.7473	60.5613	60.1786	58.2813	56.4175	54.5858	52.7849	51.0131	49.2691	47.5512	45.8576	44.1865	42.5359	40.9036	46.8744	57.3259	203.848	214.577	225.871	237.758	250.272
8	148	Chad	0	0	0	0	0	0	610.536	1221.07	2442.14	4884.28	6003.27	6790.52	7676.72	8673.14	9792.04	11046.5	12450.5	14018.4	15764.7	16351.1	16883.9	17768.1	18560.4	19777.4	21359.1	22006.3	24530.4	26425.6	27093.3	27112.2	27133	27156.2	27182.1	27211	27243.4	27280	27321.5	27368.8	27423.1	27485.8	27558.9	27645	27747.5	27871.2	28023	28213	28456.7
6	152	Chile	0	0	0	0	0	0	0	0	0	0	0	0	0	0	0	0	0	0	0	0	0	0	0	0	0	0	373.352	746.704	766.558	786.939	807.863	829.343	851.393	874.03	897.269	921.125	945.615	970.756	996.565	1101.21	1216.84	1344.61	1663.52	2091.57	2465.77	2869.82	3253.98
20	156	China	0	0	0	0	5489.15	9148.58	15247.6	25412.7	42354.5	42354.5	75586.5	26803.1	22500.2	11414	15638.6	19417	26166	21715.4	17053	20648.8	19167.6	47239.5	53990.5	41892	37325.8	47809.5	51370.2	52091.4	54510.4	62606.5	66565.1	74907.9	93432.8	103241	115337	144445	156519	152999	179153	184809	203495	215278	224876	221054	181712	177919	177384
20	158	Taiwan	0	0	0	0	0	0	0	0	11.7807	23.5614	27.3952	26.9233	26.4341	25.9262	25.3976	24.846	24.2688	23.6627	23.0238	22.3474	21.6274	25.0271	28.0317	30.5819	32.5959	33.9562	31.3451	141.034	158.424	164.584	170.891	177.337	183.907	190.589	197.361	204.201	211.08	217.963	224.806	231.556	232.55	234.638	236.267	236.991	236.803	236.062	234.08
24	162	Christmas Isl.	0	0	0	0	0	0	0	0	0	0	0	0	0	0	0	0	0	0	0	0	0	0	0	0	0	0	0	0	0	0	0	0	0	0	0	0	0	0	0	0	0	0	0	0	0	0	0
24	166	Cocos (Keeling) Isl.	0	0	0	0	0	0	0	0	0	0	0	0	0	0	0	0	0	0	0	0	0	0	0	0	0	0	0	0	0	0	0	0	0	0	0	0	0	0	0	0	0	0	0	0	0	0	0
6	170	Colombia	0	0	0	0	0	0	0	0	0	0	0	0	0	0	0	0	0	0	0	0	0	0	0	0	0	0	1883.6	3767.19	4050.75	4355.64	4683.48	5036.01	5415.06	5822.64	6260.91	6732.16	7238.88	7783.74	8369.62	8999.59	9676.98	10405.3	11188.5	12295.1	13511.1	14847.4	16315.8
9	174	Comoros	0	0	0	0	0	0	0	0	0	0	0	0	0	0	0	0	0	0	0	1.12879	2.18732	2.53467	2.84393	3.10964	3.32445	3.47796	4.03918	4.4099	4.33929	4.59611	4.86613	5.14975	5.44731	5.75911	6.08537	6.42623	6.78172	7.15171	7.53591	7.93378	8.34452	8.76696	9.19951	9.64	10.0855	10.5324	10.9755
9	175	Mayotte	0	0	0	0	0	0	0	0	0	0	0	0	0	0	0	0	0	0	0	0	0	0	0	0	0	0	0	0	0	0	0	0	0	0	0	0	0	0	0	0	0	0	0	0	0	0	0
8	178	Congo	0	0	0	0	0	0	273.33	546.659	677.225	821.594	959.743	1078.74	1211.44	1359.14	1523.19	1704.96	1905.77	2126.88	2369.3	2633.75	2920.35	3228.38	3555.76	3898.32	4248.62	4593.94	4912.63	5166.74	5143.23	5139.9	5137.1	5134.91	5133.45	5132.84	5133.25	5134.87	5137.93	5142.73	5149.64	5159.15	5171.85	5188.55	5210.34	5238.68	5275.65	5324.28	5389.15
8	180	Zaire	0	0	0	0	0	0	426.492	852.985	1021.62	1198.47	1352.26	1731.79	2218.66	2842.99	3643.07	4667.39	5977.07	7648.65	9777.23	10678.1	11484.7	12924.3	14185.1	15240.3	16855.3	18075.2	17750.4	16949.8	16874.2	16766.8	16656.3	16542.5	16425	16303.6	16178.1	16048.1	15913.3	15773.2	15627.6	15475.8	15317.3	15151.6	14978	14795.8	14604.4	14403.3	14192.2
24	184	Cook Islands	0	0	0	0	0	0	0	0	0	0	0	0	0	0	0	0	0	0	0	0	0	0	0	0	0	0	0	0	0	0	0	0	0	0	0	0	0	0	0	0	0	0	0	0	0	0	0
4	188	Costa Rica	0	0	0	0	0	0	0	0	0	0	0	0	0	0	0	0	0	0	0	0	0	0	0	0	0	0	3.88355	14.6074	16.1907	17.9354	19.8573	21.9739	24.304	26.8684	29.69	32.7935	36.2064	39.9585	46.0305	52.9463	64.3651	79.2091	95.1831	102.354	120.831	143.732	161.705
12	191	Croatia	0	0	0	0	0	0	0	43.351	77.2127	137.524	244.944	238.99	233.389	227.919	222.577	217.361	212.266	413.919	707.381	988.322	1064.71	1432.51	1195.38	925.972	1120.55	846.926	842.893	819.005	773.172	738.054	698.78	655.071	606.63	603.927	599.992	594.729	588.038	579.809	572.205	573.718	573.313	570.752	565.775	558.098	571.929	582.229	588.07
4	192	Cuba	0	0	0	0	0	0	0	0	0	0	0	0	0	0	0	0	0	0	0	0	0	0	0	0	0	0	36.2432	44.4157	50.6023	57.6506	65.6807	74.8293	85.2522	97.1269	110.656	126.069	143.629	163.634	186.427	212.394	261.247	320.156	392.348	408.168	423.218	443.961	466.345
12	196	Cyprus	0	0	0	0	0	1.98	3.13374	4.91279	7.59607	11.4899	16.6921	16.969	17.2339	17.4841	17.7165	17.9274	18.1124	18.2664	18.3829	15.6093	12.9451	12.4795	13.5732	15.236	10.8189	13.5115	7.47232	6.14766	6.06812	5.98644	5.90247	5.81603	5.72695	5.635	5.53996	5.44153	5.33941	5.23323	5.4951	5.73515	5.95153	6.14209	6.30422	6.79701	7.22942	7.59355	7.87904
12	203	Czech Rep.	0	0	0	0	0	14.6875	29.572	59.541	119.881	241.372	485.983	467.759	450.219	433.336	417.086	401.446	386.392	742.616	1250.84	1935.83	2281.52	3484.5	3678.08	4065.24	3908.89	3387.7	4137.84	4020.57	3815.55	3593.53	3354.5	3098.46	2825.42	2768.14	2704.9	2635.69	2560.5	2479.35	2401.79	2318.66	2559.14	2753.66	2699.67	2699.75	2691.83	2644.84	2547.63
8	204	Benin	0	0	0	0	0	13.9216	22.153	34.9884	54.6903	84.1826	126.365	142.619	160.886	181.396	204.403	230.185	259.043	291.299	327.303	367.42	412.036	461.542	516.333	576.783	633.181	685.179	687.977	640.166	588.969	541.848	498.481	458.568	421.836	388.033	356.925	328.298	301.956	277.717	255.413	238.561	222.812	208.093	194.339	181.485	184.461	187.477	190.533
11	208	Denmark	0	0	0	0	0	3.50987	3.92603	4.39153	4.91222	5.49466	136.08	143.931	150.977	157.267	162.851	167.772	172.074	351.031	625.422	902.403	1014.01	1506.6	1367.59	1129.23	868.642	941.029	893.977	992.734	934.447	874.177	811.567	746.471	678.713	674.214	657.543	639.54	620.204	599.535	610.666	616.715	637.978	635.578	652.932	683.127	698.552	701.723	698.324
4	212	Dominica	0	0	0	0	0	0	0	0	0	0	0	0	0	0	0	0	0	0	0	0	0	0	0	0	0	0	0.0982315	0.120382	0.137692	0.15749	0.180136	0.206038	0.235664	0.269551	0.308309	0.352642	0.403348	0.461346	0.527683	0.603559	0.690346	0.789611	0.883718	1.03459	1.10813	1.11451	0.776309
4	214	Dominican Rep.	0	0	0	0	0	0	0	0	0	0	0	0	0	0	0	0	0	0	0	0	0	0	0	0	0	59.9123	59.9123	61.1849	62.4846	63.8119	65.1673	66.5516	67.9653	69.409	70.8834	72.3891	73.9268	75.4971	77.1008	80.9882	85.0717	89.361	93.8666	98.5994	126.874	163.257	211.16
6	218	Ecuador	0	0	0	0	0	0	0	0	0	0	0	0	0	0	0	0	0	0	0	0	0	0	0	0	0	0	175.359	231.714	237.399	243.085	248.773	254.462	260.153	265.844	271.537	277.231	282.926	288.623	297.585	306.549	394.192	463.258	544.013	571.189	590.072	625.266	634.221
4	222	El Salvador	0	0	0	0	0	0	0	0	0	0	0	0	0	0	0	0	0	0	0	0	0	0	0	0	0	0	15.4254	22.2653	23.0636	23.9477	24.952	26.1256	27.5408	29.3028	31.5669	37.8708	44.4054	51.1706	58.8116	66.8162	79.6688	93.1387	107.226	117.748	125.939	139.93	150.323
8	226	Eq. Guinea	0	0	0	0	0	2.95355	3.63588	4.47256	5.49732	6.75081	8.28185	9.18429	10.1849	11.2945	12.5248	13.8889	15.4014	17.0784	18.9378	21.2619	23.5762	23.5279	23.4794	35.1459	40.918	46.6651	49.4768	52.2757	52.5275	52.7802	53.0481	53.333	53.6371	53.9629	54.3134	54.6924	55.1045	55.5556	56.0532	56.6072	57.2309	57.9429	58.7699	59.7531	60.9594	62.509	64.6504
9	231	Ethiopia	0	0	0	0	0	732.38	973.997	1283.23	1667.81	2121.58	2595.08	3119.33	3746.02	4494.01	5385.14	6444.59	7701.06	9186.89	10937.8	10625.8	10294.3	9939.97	9558.39	9143.64	8687.4	8177.43	7594.42	6904.78	6976.69	7043.39	7104.66	7160.25	7209.88	7253.25	7290.04	7319.87	7342.34	7357	7363.33	7360.75	10115.8	12751.4	15259.9	17632.4	19858.5	21926.1	23820.5
9	232	Eritrea	0	0	0	0	0	199.121	237.198	280.263	327.365	375.786	418.81	444.761	472.032	500.64	530.592	561.883	594.488	628.361	663.426	685.692	705.739	792.272	872.642	1000.67	1117.99	1223.44	1325.37	1411.22	1429.8	1451.99	1475.73	1501.2	1528.61	1558.22	1590.33	1625.3	1663.57	1705.67	1752.28	1804.23	1862.6	1928.79	2004.68	2092.83	2196.83	2321.97	2476.36
12	233	Estonia	0	0	0	0	0	0	0	1.82775	7.311	29.244	116.976	246.265	254.495	262.717	270.875	278.904	286.721	294.226	301.291	307.76	313.432	318.05	321.275	322.649	321.53	316.972	307.477	290.389	334.387	384.845	442.662	508.843	584.516	670.934	769.487	881.701	1009.24	1153.89	1317.55	1471.54	1640.73	1825.75	2026.92	2244.05	2253.27	2253.18	2241.3
11	234	Faeroe Islands	0	0	0	0	0	0.979166	1.38736	1.94734	2.71464	3.76445	3.97858	4.07326	4.17006	4.26903	4.3702	4.47364	4.57938	4.68749	4.798	4.91099	5.02649	5.14457	5.26528	5.38867	5.51482	5.64377	5.7756	5.91035	7.39004	9.24018	11.5535	14.446	18.0626	22.5847	28.2388	35.3086	44.1482	55.2008	69.0205	86.3	107.905	134.92	168.697	210.931	263.737	329.764	412.321
6	238	Falkland Is.	0	0	0	0	0	0	0	0	0	0	0	0	0	0	0	0	0	0	0	0	0	0	0	0	0	0	0	0	0	0	0	0	0	0	0	0	0	0	0	0	0	0	0	0	0	0	0
24	242	Fiji	0	0	0	0	0	0	0	0	0	2.87574	3.22528	3.53712	3.87705	4.24718	4.64972	5.0869	5.56099	6.07419	6.62864	7.22625	7.86865	8.55702	9.29181	10.0725	10.8973	11.7624	12.6611	13.583	14.2448	14.9382	15.6647	16.4259	17.2232	18.0584	18.9332	19.8495	20.809	21.8139	22.866	24.0343	25.2608	26.5484	27.9001	29.3188	30.1928	31.0909	32.4644
11	246	Finland	0	0	0	0	0	0.834902	1.18926	1.49153	1.72964	2.19767	5.47322	4.03392	5.28045	6.47319	7.60871	8.68309	9.69177	10.6294	11.4896	13.8258	15.9662	17.888	19.5623	20.9505	18.0327	16.8906	31.1376	55.912	60.3467	65.0988	70.1847	75.6207	81.4222	87.6031	94.1755	101.148	108.527	116.311	124.494	133.057	151.494	156.859	172.547	176.651	183.357	192.188	212.225
11	250	France	0	0	0	0	0	68.1313	135.314	269.632	670.109	1342.8	3360.16	3725.34	4044.85	3445.88	2887.02	2639.86	2407.46	4876.55	8633.57	13635.5	16329	24736.3	26464.7	29748.8	23737.2	23317.7	23389.5	27290.4	25890.4	24376.3	22748.1	21006	19149.8	18739.3	18290.3	17802.8	17277	16712.7	17320.9	17710.3	17782.1	18003	18150.1	17843.2	17408.3	17224.4	16863.9
6	254	French Guiana	0	0	0	0	0	0	0	0	0	0	0	0	0	0	0	0	0	0	0	0	0	0	0	0	0	0	0.109637	0.158252	0.18013	0.204916	0.232986	0.264764	0.300727	0.341414	0.387429	0.439455	0.498259	0.564705	0.646861	0.740303	0.846522	0.967207	1.10426	1.14949	1.19114	1.22785	1.25802
24	258	French Polynesia	0	0	0	0	0	0	0	0	0	0	0.00342939	0.00509756	0.00757523	0.0112542	0.016715	0.0248181	0.0368375	0.0546591	0.081073	0.120204	0.178148	0.263905	0.390752	0.578264	0.855272	1.26419	1.86735	2.75624	2.89651	3.04389	3.19874	3.36144	3.53238	3.71199	3.9007	4.09896	4.30726	4.52611	4.75603	5.01147	5.28058	5.56409	5.86276	6.17741	6.37894	6.58699	6.80175
9	262	Djibouti	0	0	0	0	0	13.9109	21.5663	33.3353	51.3993	79.0853	121.465	124.226	127.048	129.932	132.879	135.891	138.97	142.116	145.331	153.736	162.175	195.024	228.01	261.131	294.387	327.776	348.981	370.268	369.866	373.521	377.371	381.435	385.738	390.305	395.168	400.364	405.938	411.942	418.442	425.517	433.269	441.825	451.352	462.071	474.285	488.423	505.119
8	266	Gabon	0	0	0	0	0	0	0	0	80.0332	124.856	193.977	222.425	255.036	292.419	335.271	384.391	440.694	505.229	579.197	663.976	761.143	872.506	1000.13	1146.4	1314.03	1506.12	1726.26	1978.52	2019.47	2038.73	2059.01	2080.4	2103.02	2127.01	2152.54	2179.79	2208.99	2240.42	2274.42	2311.38	2351.83	2396.43	2446.02	2501.75	2565.16	2638.43	2724.81
16	268	Georgia	0	0	0	0	0	4.5672	10.6568	24.8659	58.0204	135.381	315.889	676.904	712.022	748.156	785.172	822.89	861.07	899.397	937.456	961.005	979.42	1416.28	1812.21	2163.2	1636.99	1918.23	2119.71	2220.72	1395.26	1491.17	1592.74	1700.17	1813.6	1933.14	2058.86	2190.75	2328.69	2472.49	2621.78	2775.99	2934.32	3095.61	3258.28	3420.14	3578.2	3728.33	3864.78
8	270	Gambia	0	0	0	0	0	0.103454	0.14545	0.203007	0.281782	0.389432	0.536335	0.61484	0.704817	0.807938	0.926122	1.06157	1.21679	1.39467	1.59851	1.83211	2.09978	2.40651	2.75798	3.16071	3.62216	4.15089	4.7567	5.4508	4.92291	4.44614	4.01555	3.62665	3.27542	2.9582	2.67171	2.41296	2.17927	1.96821	1.77759	2.66709	4.00169	6.00412	9.00856	13.5164	20.2799	30.4279	45.6538
17	275	Occupied Palestinian Territory	0	0	0	0	0	11.3766	14.4403	18.173	22.5944	27.5719	32.5727	32.8035	33.0129	33.1981	31.9367	30.6944	29.4695	28.2602	27.0645	25.8801	24.7045	23.5346	22.3668	21.1965	20.0182	18.8246	17.6058	16.3481	18.0604	19.9501	22.0352	24.3356	26.8731	29.6718	32.7579	36.1605	39.9113	44.0452	46.8646	49.8571	53.0326	56.4011	59.9736	63.7611	63.8959	64.0185	64.1284
11	276	Germany	0	0	0	0	0	29.571	57.903	107.444	212.6	422.419	2041.2	2126.25	2201.74	2117.06	2035.63	1817.53	1613.19	3226.38	5646.17	8065.96	8872.56	12905.5	15325.3	16938.5	14115.4	14115.4	15325.3	16131.9	16019	15720.7	15236.8	14567.3	13712.1	13844.8	13911.1	13911.1	13844.8	13712.1	13170.3	12530.5	12758.6	12659.9	12098.9	11676.3	11348.3	11076.8	10474
8	288	Ghana	0	0	0	0	0	0	0	72.0644	112.507	174.895	270.94	310.595	356.044	408.131	467.827	536.239	614.64	704.486	807.445	925.428	1060.63	1215.54	1393.06	1596.46	1829.52	2096.56	2402.52	2753.07	2776.01	2800.08	2825.39	2852.07	2880.26	2910.12	2941.86	2975.7	3011.92	3050.85	3092.89	3138.54	3188.42	3243.31	3304.24	3372.56	3450.11	3539.5	3644.56
11	292	Gibraltar	0	0	0	0	0	0	0	0	0	0	0	0	0	0	0	0	0	0	0	0	0	0	0	0	0	0	0	0	0	0	0	0	0	0	0	0	0	0	0	0	0	0	0	0	0	0	0
24	296	Kiribati	0	0	0	0	0	0	0	0	0	0	0	0	0	0	0	0	0	0	0	0	0	0	0	0	0	0	0	0	0	0	0	0	0	0	0	0	0	0	0	0	0	0	0	0	0	0	0
11	300	Greece	0	0	0	0	0	13.9809	28.4839	57.975	176.845	598.905	1216.08	1217.88	1219.67	1068.77	917.427	704.382	490.713	522.133	553.639	585.231	616.908	667.203	723.822	774.399	558.346	621.248	933.163	934.45	976.739	1019.04	1061.35	1103.67	1146.01	1188.35	1230.71	1273.08	1315.46	1357.85	1400.26	1442.67	1581.42	1733.3	1900.22	2082.78	2283.51	2528.62	2799.42
25	304	Greenland	0	0	0	0	0	0	0	0	0	0	0	0	0	0	0	0	0	0	0	0	0	0	0	0	0	0	0	0	0	0	0	0	0	0	0	0	0	0	0	0	0	0	0	0	0	0	0
4	308	Grenada	0	0	0	0	0	0	0	0	0	0	0	0	0	0	0	0	0	0	0	0	0	0	0	0	0	0	0.496302	0.716371	0.794019	0.879584	0.97384	1.07764	1.19191	1.31768	1.45605	1.60826	1.77563	1.95964	2.18586	2.3265	2.47409	2.62893	2.79135	2.70228	2.60708	2.50209	2.38677
4	312	Guadaloupe	0	0	0	0	0	0	0	0	0	0	0	0	0	0	0	0	0	0	0	0	0	0	0	0	0	0	4.99591	5.34322	5.66783	6.01216	6.37742	6.76486	7.17584	7.61179	8.07422	8.56474	9.08507	9.63701	10.2225	10.3561	10.4915	10.6286	10.7676	10.9083	11.0632	11.2203	11.3796
24	316	Guam	0	0	0	0	0	0.0243552	0.0289203	0.0340207	0.0394807	0.0448444	0.0489824	0.0601926	0.0739004	0.090637	0.111036	0.135851	0.165966	0.202413	0.246381	0.299209	0.36237	0.43741	0.525831	0.628857	0.746991	0.879159	1.021	1.16112	1.20872	1.25779	1.30832	1.36027	1.41362	1.4683	1.52426	1.58138	1.63957	1.69867	1.7585	1.8239	1.88988	1.95611	2.02218	2.08757	2.1087	2.12614	2.13913
4	320	Guatemala	0	0	0	0	0	0	0	0	0	0	0	0	0	0	0	0	0	0	0	0	0	0	0	0	0	0	113.84	175.668	177.543	179.335	181.048	182.682	184.24	185.723	187.133	188.471	189.74	190.941	194.206	197.349	229.247	265.204	306.567	326.07	340.336	343.005	332.936
8	324	Guinea	0	0	0	0	0	0	0	0	162.156	252.93	392.902	450.517	516.564	592.275	679.062	778.541	892.567	1023.26	1173.06	1344.75	1541.53	1767.06	2025.52	2321.72	2661.18	3050.18	3495.97	4006.8	4040.26	4075.37	4112.28	4151.19	4192.29	4235.83	4282.1	4331.44	4384.24	4440.99	4502.27	4568.8	4641.49	4721.49	4810.27	4909.82	5022.81	5153.04	5306.09
6	328	Guyana	0	0	0	0	0	0	0	0	0	0	0	0	0	0	0	0	0	0	0	0	0	0	0	0	0	0	111.935	164.166	176.184	188.973	202.582	217.058	232.453	248.822	266.223	284.718	304.369	325.247	351.276	380.86	412.585	446.595	483.042	476.363	481.282	483.713	483.207
4	332	Haiti	0	0	0	0	0	0	0	0	0	0	0	0	0	0	0	0	0	0	0	0	0	0	0	0	0	0	3.63517	6.01227	7.69887	9.85301	12.603	16.1123	20.5884	26.2957	33.5697	42.8373	54.6406	69.6682	89.7794	115.592	134.443	148.123	163.073	170.042	174.684	172.715	179.681
24	334	Heard and McDonald Isl.	0	0	0	0	0	0	0	0	0	0	0	0	0	0	0	0	0	0	0	0	0	0	0	0	0	0	0	0	0	0	0	0	0	0	0	0	0	0	0	0	0	0	0	0	0	0	0
11	336	Holy See	0	0	0	0	0	0	0	0	0	0	0	0	0	0	0	0	0	0	0	0	0	0	0	0	0	0	0	0	0	0	0	0	0	0	0	0	0	0	0	0	0	0	0	0	0	0	0
4	340	Honduras	0	0	0	0	0	0	0	0	0	0	0	0	0	0	0	0	0	0	0	0	0	0	0	0	0	0	166.738	63.0334	66.7994	70.7502	74.8941	79.2396	83.7957	88.5719	93.5778	98.8236	104.32	110.078	117.396	125.089	245.206	294.172	352.649	367.832	369.432	369.101	366.533
20	344	Hong Kong	0	0	0	0	0	0	0	0	0	0	0	0	0	0	0	0	0	0	0	0	0	0	0	0	0	0	0	0	0	0	0	0	0	0	0	0	0	0	0	0	0	0	0	0	0	0	0
12	348	Hungary	0	0	0	0	0	37.0137	49.6828	66.6884	134.272	202.76	204.12	196.27	188.721	181.462	174.483	139.81	107.546	258.111	521.185	955.966	1267.51	1935.83	2043.38	2352.57	2171.61	1960.48	1596.39	1861.38	1904.49	1916.86	1898.48	1849.36	1769.49	1811.17	1842.07	1862.17	1871.47	1869.99	1874.08	1869	2001.73	2109.1	2112.29	2074.2	2045.54	2041.84	2035.68
11	352	Iceland	0	0	0	0	0	2.57539	5.47349	11.5241	24.0972	50.124	103.831	106.302	108.828	111.411	114.051	116.751	119.51	122.332	125.216	314.002	629.919	884.551	887.2	889.832	764.956	767.186	641.17	637.202	650.391	663.853	677.594	691.619	705.934	720.545	735.458	750.68	766.217	782.075	798.261	831.756	866.657	903.022	940.912	980.393	990.574	1000.86	1011.25
18	356	India	0	0	0	0	0	0	0	85.9503	171.901	343.801	687.602	1375.2	1440.69	1506.18	1571.66	1637.15	1702.63	1768.12	1833.61	1899.09	1964.58	2030.06	2095.55	2161.04	2226.52	2292.01	2357.49	2881.38	2945.41	3009.44	3073.47	3137.5	3201.53	3265.57	3329.6	3393.63	3457.66	3521.69	3585.72	3579.9	3771.99	3702.14	4051.4	4260.95	4470.51	4491.46	4883.09
22	360	Indonesia	0	0	0	0	0	19.6372	24.7112	31.0963	229.57	430.707	634.533	676.524	716.624	754.892	791.383	826.154	859.256	890.743	920.665	949.07	976.008	1063.19	1146.58	1226.29	1532.86	1826.93	1964.45	2152.51	2132.51	2112.48	2092.41	2072.31	2052.2	2112.56	2169.76	2223.91	2275.1	2323.43	2405.43	2483.33	2557.24	2627.3	2693.63	3367.04	4013.01	4632.34	5225.85
17	364	Iran, Isl.Rep.of	0	0	0	194.67	532.442	1005.75	1762.07	2520.09	3279.81	4041.23	8091.53	8429.61	8767.78	9106.02	9444.33	9782.72	10121.2	9211.31	8301.23	8707.14	9113.13	9620.49	10128	7090.36	7597.66	8105.08	10132.5	10133.6	10562.3	10785.7	11013.8	11246.8	11484.7	11727.6	11975.7	12229	12487.7	12751.9	13021.6	13297.1	14049.2	14801.4	15553.6	16305.8	17058.1	19672.2	22286.5
17	368	Iraq	0	0	0	25.3395	28.4151	52.0634	157.371	264.223	465.734	670.044	539.75	567.124	594.535	594.94	595.344	568.668	541.954	949.06	1356.71	1221.86	1086.83	951.612	748.194	544.504	544.866	545.228	681.987	545.95	546.079	546.207	546.336	546.464	546.593	546.722	546.85	546.979	547.107	547.236	576.076	606.436	638.395	672.039	707.456	744.74	851.187	972.85	1111.9
11	372	Ireland	0	0	0	0	0	0.0491772	0.196709	0.786835	3.14734	12.5894	50.3574	102.77	109.237	116.111	123.417	131.183	139.438	273.184	469.067	681.126	760.505	1290.55	1532.53	1505.65	1302.96	1254.71	1596.39	3102.29	3502.25	3322.83	3126.87	2913.45	2681.59	2583.26	2483.28	2664.75	3037.73	3117.58	3907.89	4992.68	5908.41	6734.77	5904.32	5298.37	5213.06	5274.68	5027.3
17	376	Israel	0	0	0	9.16037	13.21	18.9496	26.9953	38.0947	53.0238	72.2125	94.4926	139.305	205.175	301.871	221.805	162.756	119.243	87.2097	63.6506	56.6419	49.8437	49.6805	49.25	48.5033	33.4393	39.2203	36.2486	26.1508	28.1382	30.0586	31.9091	33.6866	35.3877	37.0084	38.5445	39.9913	41.3434	42.5949	43.4801	44.7673	46.0285	47.2501	48.4153	49.5032	49.005	48.3648	47.5561
11	380	Italy	0	0	0	0	0	33.6534	65.2523	125.801	400.891	756.498	2597.61	2440.92	2285.89	2132.6	1981.12	1307.79	647.748	956.942	1255.07	1386.82	1571.23	1921.51	2451.7	3505.74	2171.65	2349.64	3301.12	3144.45	3216.27	3300.59	3385.98	3472.32	3559.44	3647.16	3735.25	3823.44	3911.41	3998.76	4085.03	4169.65	4382.58	4601.33	4824.84	5051.27	5068.44	5259.63	5487.13
8	384	Cote d'Ivoire	0	0	0	0	0	69.5504	103.44	152.418	223.06	324.747	470.849	539.896	619.048	709.781	813.788	933.007	1069.66	1226.29	1405.82	1611.58	1847.4	2117.68	2427.44	2782.42	3189.24	3655.45	4189.7	4801.92	4835.97	4871.65	4909.1	4948.51	4990.07	5034.02	5080.63	5130.23	5183.21	5240.02	5301.22	5367.51	5439.73	5518.99	5606.68	5704.66	5815.46	5942.62	6091.35
4	388	Jamaica	0	0	0	0	0	0	0	0	0	0	0	0	0	0	0	0	0	0	0	0	0	0	0	0	0	0	15.9924	10.5801	12.6449	15.104	18.0317	21.5156	25.66	30.5883	36.4464	43.4077	51.6769	61.4968	73.9658	78.2444	82.7003	87.3399	92.1698	88.6844	93.7356	98.5573	102.998
23	392	Japan	0	0	0	0	0	16.4916	23.4909	33.1439	46.1212	62.7855	82.0873	134.445	184.788	284.774	380.369	558.093	726.734	1062.7	1263.55	1426.79	1294.17	1289.17	1277.04	1389.73	1676.14	2076.18	2644.46	3726.61	3995.09	3941.13	3885.65	3828.54	3769.68	3683.33	3595.79	3506.93	3416.57	3324.54	3346.82	3361.67	3368.38	3366.12	3353.86	3368.29	3367.29	3469.79	3613.91
15	398	Kazakhstan	0	0	0	0	22.863	53.347	124.476	290.445	677.704	1581.31	3689.72	7906.55	8499.16	9135.89	9820.02	10555.1	11344.8	12193.2	13104.7	13443.8	13784.4	14126.6	14470.3	16176.3	18194.9	20376.9	23333.4	26306.1	26063.3	25820.4	25577.3	25334.1	25090.7	24847.2	24603.6	24359.7	24115.8	23871.7	23627.4	23383.1	23138.5	22893.8	22649	22404	22158.9	28525.2	33698.6
17	400	Jordan	0	0	0	15.1174	20.3659	27.2544	36.299	48.1756	63.7714	84.2513	111.146	159.889	230.004	330.858	254.565	195.861	150.691	115.937	89.196	82.1082	74.9834	77.4698	79.9663	82.4731	60.0441	75.8868	76.0649	60.4679	61.9238	62.0622	62.201	62.3401	62.4795	62.6191	62.7591	62.8994	63.04	63.1809	63.3221	63.4636	66.8191	70.3521	74.0719	77.9883	82.1118	102.663	128.358
9	404	Kenya	0	0	0	0	0	473.626	578.349	703.777	851.242	1018.43	1191.97	1474.44	1822.81	2252.02	2780.29	3429.65	4226.7	5203.35	6397.6	7330.62	8213.62	9441.24	10582.8	11622.6	12538.2	13296.5	14772.3	15822.4	16074.9	16126.1	16180	16236.7	16296.6	16360	16427.4	16499.2	16576.1	16658.7	16747.9	16844.9	16951.1	17068.1	17198.5	17345.3	17512.9	17707.8	17939.5
19	408	Dem.Rep.,Korea	0	0	0	0	0	13.7252	16.292	19.1556	22.2132	25.1992	27.4548	34.516	43.3513	54.3897	68.1561	85.2897	106.563	132.903	165.404	180.571	194.116	224.552	287.317	205.589	227.071	243.04	279.965	313.982	340.404	353.477	366.84	380.468	394.331	408.389	422.596	436.893	451.209	465.455	479.526	493.289	489.722	479.225	467.866	455.514	442.006	426.902	412.444
19	410	Rep. of Korea	0	0	0	0	0	13.741	16.3107	19.1776	22.2387	25.2281	27.4863	37.127	50.1008	67.5354	90.9268	122.252	164.112	219.907	294.051	321.014	345.093	399.203	510.784	365.49	403.68	432.068	497.711	558.184	605.816	640.316	676.389	714.044	753.275	794.061	836.357	880.091	925.159	971.412	1018.65	1066.59	1052.96	1027.29	999.923	979.209	955.606	923.29	887.375
17	414	Kuwait	0	0	0	0	0	3.4131	5.10411	7.63272	11.4137	17.0671	25.52	26.3916	27.293	28.2251	29.1891	30.186	31.217	32.2831	33.3857	33.375	33.3643	33.3537	33.343	33.3323	33.3216	33.3109	65.1525	56.4473	57.7092	58.2903	58.8771	59.4699	60.0687	60.6735	61.2844	61.9014	62.5247	63.1542	63.7901	64.4323	65.0811	65.7363	66.3982	67.0667	67.742	68.424	69.113
15	417	Kyrgyzstan	0	0	0	0	5.54516	12.9387	30.1903	70.4441	164.37	383.529	894.901	1917.64	2017.82	2121.02	2226.91	2335.02	2444.71	2555.17	2665.29	2701.3	2725.41	2841.29	2933.52	2998.34	3030.61	3022.92	3204.19	3270.1	3414.69	3561.67	3713.34	3869.62	4030.4	4195.52	4364.76	4537.83	4714.34	4893.81	5075.63	5259.06	5443.15	5626.74	5808.4	5986.35	6158.37	6321.71	6472.86
21	418	Lao	0	0	0	0	0	15.4921	19.1091	23.5576	29.0243	35.7361	43.9684	47.2225	50.7171	54.4698	58.4997	62.8272	67.4744	72.4646	77.8233	91.2569	104.644	117.984	131.278	144.524	157.723	170.873	213.217	255.41	259.621	263.831	268.038	272.245	276.45	280.653	284.855	289.055	293.254	297.451	331.386	365.31	399.221	433.12	467.007	500.882	534.745	568.595	602.434
17	422	Lebanon	0	0	0	25.6499	34.582	46.4009	61.8732	81.8183	106.921	137.227	170.748	191.672	215.019	241.038	211.297	185.065	161.932	141.538	123.562	113.747	104.139	107.192	109.793	111.892	86.5091	89.3378	100.099	81.7572	77.1888	75.2829	73.4181	71.5933	69.8078	68.0607	66.351	64.6781	63.041	61.4389	59.8711	58.3368	63.0715	67.1459	71.4745	76.0723	80.9548	95.9787	96.2649
10	426	Lesotho	0	0	0	0	0	0	0.019425	0.0404728	0.0899736	0.220352	0.633675	0.783294	0.971347	1.20874	1.50986	1.8938	2.38619	3.02169	3.84772	4.92995	6.36052	8.2707	10.8508	14.3821	19.2903	26.2366	36.2814	202.69	225.115	248.964	274.4	301.619	330.848	362.358	396.477	433.596	474.199	518.883	568.396	623.694	686.016	701.355	720.018	743.027	771.877	808.834	857.529
12	428	Latvia	0	0	0	0	0	0	0.0428408	0.171363	0.685452	2.74181	10.9672	23.0889	23.8968	24.7107	25.5267	26.3399	27.1446	27.9336	28.6982	29.4274	30.1077	30.7221	31.2488	31.6597	31.9173	31.9704	31.746	31.1341	36.0345	41.6981	48.2418	55.8005	64.5288	74.6044	86.2315	99.6439	115.11	132.936	153.474	173.51	196.09	221.523	250.15	282.349	309.692	339.505	371.977
8	430	Liberia	0	0	0	0	0	26.1574	41.5942	65.5673	102.693	160.045	248.446	262.371	277.069	292.581	308.952	326.23	344.464	363.707	384.014	405.443	428.057	451.921	477.102	503.673	531.711	561.296	592.513	625.451	631.307	637.46	643.937	650.772	658.004	665.675	673.84	682.559	691.906	701.97	712.857	724.702	737.669	751.973	767.887	785.779	806.15	829.707	857.498
7	434	Libyan A.J.	0	0	0	0	0	268.661	428.219	676.171	1060.39	1654.24	2570.01	2900.87	3233.78	2919.88	2603.82	2742.74	2882.43	3022.9	3164.12	3239.97	3316.17	2328.33	1334.46	2007.62	2684.7	3365.65	3375.37	3385.04	3150.11	3172.46	3194.82	3217.19	3239.57	3261.97	3284.37	3306.79	3329.22	3351.66	3374.11	3654.71	3688.15	3721.6	3755.07	3788.56	3822.07	3855.6	4083.91
11	438	Liechtenstein	0	0	0	0	0	1.74889	2.01215	2.31503	2.6635	3.06444	3.52572	3.4593	3.39413	3.33019	3.26746	3.2059	3.14551	6.16263	10.5814	14.8535	16.0769	20.8791	16.8666	12.6817	14.9313	11.0038	9.14311	9.0653	8.58631	8.07681	7.53553	6.96118	6.35243	6.23191	6.10103	5.95935	5.80639	5.64166	5.60681	5.56645	5.52034	5.4682	5.40977	5.34473	5.27281	5.19369	5.10704
12	440	Lithuania	0	0	0	0	0	0	0.7318	2.9272	11.7088	46.8352	187.341	394.402	407.582	420.75	433.816	446.675	459.194	471.213	482.528	492.888	501.973	509.369	514.534	516.735	514.943	507.644	492.438	465.072	535.537	616.35	708.946	814.939	936.134	1074.54	1232.38	1412.1	1616.36	1848.03	2110.15	2356.77	2627.74	2924.07	3246.27	3594.02	3855.56	4119.05	4377.5
11	442	Luxembourg	0	0	0	0	0	3.95729	5.97577	9.02382	13.6266	20.577	31.0727	30.4874	29.913	29.3495	28.7966	28.2541	27.7219	54.3122	93.2559	130.907	141.688	184.011	148.648	111.766	131.592	96.9783	80.5797	79.8939	77.9968	75.622	72.7211	69.2417	65.1273	65.8541	66.4513	66.9017	67.1866	67.2856	68.2198	72.8159	77.5673	82.4489	87.428	92.4623	88.3308	88.6601	88.333
20	446	Macau	0	0	0	0	0	0	0	0	0	0	0	0	0	0	0	0	0	0	0	0	0	0	0	0	0	0	0	0	0	0	0	0	0	0	0	0	0	0	0	0	0	0	0	0	0	0	0
9	450	Madagascar	0	0	0	0	0	1.0781	1.53818	2.17522	3.03726	4.15803	5.49701	10.8225	21.2909	41.8489	82.1791	161.204	315.842	617.984	1207.29	1765.78	2290.92	3150.3	3945.76	4670.17	5314.44	6659.42	7662.72	8454.24	8553.23	8612.18	8675.49	8743.7	8817.42	8897.35	8984.37	9079.48	9183.94	9299.26	9427.3	9570.41	9731.58	9914.68	10124.8	10368.9	10656.7	11002	11426.1
10	454	Malawi	0	0	0	0	0	4.34837	5.4716	6.88608	8.6677	10.9123	13.7409	16.8001	20.5403	25.1133	30.7043	37.54	45.8975	56.1157	68.6087	80.6885	92.7762	111.368	129.973	148.59	167.219	185.86	201.725	217.601	221.06	225.292	229.795	234.602	239.747	245.273	251.232	257.682	264.697	272.366	280.799	290.134	300.547	312.267	325.597	340.951	358.908	380.312	406.454
21	458	Malaysia	0	0	0	0	0	0.960738	1.14043	1.34091	1.55499	1.76411	1.92222	2.83349	4.17274	6.13838	9.01905	13.2335	19.3869	28.3503	41.3711	42.3789	43.1627	49.7678	55.5908	60.5126	64.3692	66.9234	77.12	83.0862	84.8592	86.5272	88.0849	89.5266	90.846	92.0358	93.0881	93.9939	94.7429	95.3233	97.9847	100.347	102.383	104.063	105.349	132.746	157.85	180.384	199.992
18	462	Maldives	0	0	0	0	0	0.0015556	0.00184652	0.00217108	0.00251763	0.00285607	0.00311174	0.00458684	0.00675468	0.00993639	0.0145991	0.0214204	0.0313796	0.0458864	0.0669584	0.0974646	0.141447	0.204533	0.294416	0.42134	0.598333	0.840549	1.16192	1.56378	1.57206	1.57954	1.58614	1.59176	1.5963	1.59965	1.60166	1.6022	1.60109	1.59814	1.59311	1.63886	1.68306	1.72503	1.76396	1.79879	1.92975	2.06171	2.19119
8	466	Mali	0	0	0	0	0	7.03047	17.9109	44.4299	107.589	254.89	591.917	705.969	841.845	1003.69	1196.44	1425.95	1699.2	2024.44	2411.53	2652.75	2909.51	3258.39	3630.74	4098.57	4741.87	5346.46	6492.79	7722.74	7890.91	8010.86	8136.58	8268.63	8407.7	8554.56	8710.13	8875.49	9051.93	9241	9444.62	9665.12	9905.46	10169.4	10461.8	10789.3	11160.7	11588.9	12092.6
12	470	Malta	0	0	0	0	0	0	0	0	0	0	0	0	0	0	0	0	0	0	0	0	0	0	0	0	0	0	0	0	0	0	0	0	0	0	0	0	0	0	0	0	0	0	0	0	0	0	0
4	474	Martinique	0	0	0	0	0	0	0	0	0	0	0	0	0	0	0	0	0	0	0	0	0	0	0	0	0	0	1.46668	0.970307	1.15967	1.3852	1.6537	1.97322	2.35331	2.80528	3.34254	3.98096	4.73934	5.63993	6.78348	7.22796	7.69504	8.18574	8.70113	8.43287	8.42633	8.37583	8.27512
8	478	Mauritania	0	0	0	0	0	6.68369e-08	1.78232e-07	4.75285e-07	1.26743e-06	3.3798e-06	9.01281e-06	2.06007e-05	4.70873e-05	0.000107628	0.000246007	0.000562302	0.00128526	0.00293774	0.00671484	0.0141758	0.0298437	0.064164	0.137281	0.305378	0.666279	1.4325	3.3425	7.64	15.4466	31.1005	62.6367	126.191	254.32	512.742	1034.19	2086.94	4213.53	8512.18	17207.9	17411.8	17633.7	17877	18146	18446.2	18785.4	19174.2	19628.2
9	480	Mauritius	0	0	0	0	0	0	0	0	0	0	0	0	0	0	0	0	0	0	0	0	0	0	0	0	0	0	2.96355	3.87392	4.74746	5.81796	7.12985	8.73757	10.7078	13.1223	16.0813	19.7074	24.1513	29.5971	36.271	44.4497	54.4727	85.8376	72.9332	66.1339	61.48	62.1028	56.5107
3	484	Mexico	0	0	0	0	0	0	0	0	0	0	0	0	0	0	0	0	0	0	0	0	0	0	0	0	0	0	5903.48	11807	12546.9	13253.2	13927.1	14569.4	15181.1	15763.3	16316.8	16842.5	17341.4	17814.2	18261.8	18685	19084.6	19461.3	19815.9	20149.2	20461.7	20754.2	24947.7
11	492	Monaco	0	0	0	0	0	0	0	0	0	0	0	0	0	0	0	0	0	0	0	0	0	0	0	0	0	0	0	0	0	0	0	0	0	0	0	0	0	0	0	0	0	0	0	0	0	0	0
20	496	Mongolia	0	0	0	0	0	3582.14	4912.93	6747.83	9287.89	12824.7	17790.8	18801.3	19869.4	20998.6	22192.5	23454.9	24789.9	26201.9	27695.7	29640.9	31667.6	42223.5	53299.9	58083.2	42051.2	43129.4	44235.3	45369.6	46275.2	47620.5	49004.9	50429.5	51895.6	53404.3	54956.8	56554.4	58198.6	59890.5	61631.5	63423.3	65634.6	68458.5	71403.9	74476.1	77680.4	81813.1	92302
14	498	Rep. of Moldova	0	0	0	0	0	10.1433	11.2477	12.3587	13.4013	14.234	14.5653	15.3507	16.1647	17.0057	17.8715	18.759	19.6641	20.5812	21.5029	22.4198	23.2155	33.7075	48.769	46.8342	44.7249	56.527	66.2948	81.6872	53.3757	57.2899	61.4748	65.9469	70.7233	75.8216	81.2599	87.0571	93.2319	99.8035	106.791	114.213	122.089	130.434	139.265	148.596	158.437	168.795	179.672
4	500	Montserrat	0	0	0	0	0	4.02497e-07	7.64762e-07	1.43956e-06	2.67338e-06	4.85977e-06	8.49751e-06	1.6709e-05	3.28256e-05	6.44222e-05	0.000126289	0.00024725	0.000483367	0.000943389	0.00183766	0.00357152	0.00692263	0.0133744	0.0257357	0.0492717	0	0	0	0.599608	0.641801	0.686716	0.734491	0.785265	0.839178	0.896363	0.956952	1.02106	1.08881	1.16028	1.23555	1.25555	1.27475	1.29297	1.31001	1.32563	1.34105	1.35447	1.36549
7	504	Morocco	0	0	0	0	0	141.803	224.765	353.482	552.648	860.081	1333.63	1429.46	1532.13	1642.13	1759.98	1886.23	2021.48	2166.37	2321.58	2533.82	2747.21	2617.36	2486.67	2784.63	2500.69	2089.7	3143.2	2451.39	2561.7	2672.07	2782.5	2892.98	3003.53	3114.13	3224.8	3335.52	3446.3	3557.14	3668.04	3778.99	4457.36	5136.08	5815.18	6494.63	7174.45	7854.63	8535.17
10	508	Mozambique	0	0	0	0	0	0.14945	0.418459	0.813753	1.68842	3.8594	10.3587	12.6045	15.3863	18.8475	23.1749	28.6139	35.4902	44.2398	55.4534	89.3682	131.593	219.595	332.296	478.408	670.639	928.042	1403.66	8233.78	9183.03	10175.7	11211.7	12291	13413.8	14579.9	15789.4	17042.2	18338.4	19678	21061	22487.3	23971.1	25641.7	27387.6	29204.9	29727.9	30202.1	30619.5
17	512	Oman	0	0	0	0	0	26.8382	42.6549	67.2145	105.244	163.984	254.514	264.142	274.125	284.477	295.211	306.342	317.882	329.849	342.256	343.283	344.304	345.318	346.327	347.33	348.328	349.319	411.608	474.235	481.395	488.559	495.726	502.897	510.072	517.251	524.433	531.62	538.81	546.004	553.202	560.403	576.107	593.214	610.829	628.968	647.645	665.907	701.147
10	516	Namibia	0	0	0	0	0	0.197705	0.79082	2.19695	6.51193	21.2643	81.534	94.7196	110.39	129.102	151.557	178.656	211.559	251.778	301.311	362.824	439.934	537.625	662.888	825.741	1040.88	1330.5	1729.15	9078.68	10248	11507.1	12862.2	14320.2	15888.1	17573.7	19385.2	21331.3	23421.5	25665.7	28074.8	30660.2	33434.2	33733.5	33990.4	34199.9	34356.2	34453.1	34483.9
24	520	Nauru	0	0	0	0	0	0	0	0	0	0	0	0	0	0	0	0	0	0	0	0	0	0	0	0	0	0	0	0	0	0	0	0	0	0	0	0	0	0	0	0	0	0	0	0	0	0	0
18	524	Nepal	0	0	0	0	0	0.554538	1.38635	3.46586	8.66466	21.6617	54.1541	112.957	115.706	118.401	121.02	123.536	125.918	128.13	130.124	130.935	131.234	135.177	138.127	139.926	140.356	139.107	161.551	176.373	178.692	180.869	182.897	184.771	186.482	188.024	189.386	190.56	191.534	192.297	192.835	193.133	195.928	200.126	65.5751	85.2273	110.607	145.528	190.996
11	528	Netherlands	0	0	0	0	0	4.40591	8.87095	17.861	35.9617	72.4061	145.784	133.502	122.254	111.955	102.523	93.8852	85.9754	157.212	448.366	801.735	935.453	1428.69	1272.43	1658.79	1367.14	1703.84	1970.82	2481.83	2329.37	2170.7	2005.83	1834.75	1657.48	1609.32	1558.98	1506.47	1451.78	1394.92	1342.62	1288.33	1327.85	1366.11	1377.54	1390.24	1399.53	1445.53	1487.11
4	530	Neth.Antilles	0	0	0	0	0	0	0	0	0	0	0	0	0	0	0	0	0	0	0	0	0	0	0	0	0	0	0	0	0	0	0	0	0	0	0	0	0	0	0	0	0	0	0	0	0	0	0
4	533	Aruba	0	0	0	0	0	0	0	0	0	0	0	0	0	0	0	0	0	0	0	0	0	0	0	0	0	0	0.0233199	0.0464077	0.0499618	0.0537881	0.0579075	0.0623423	0.0671167	0.0722568	0.0777905	0.0837481	0.0901618	0.0970668	0.104501	0.107447	0.110476	0.11359	0.116793	0.132447	0.161547	0.262265	0.313874
24	540	New Caledonia	0	0	0	0	0	0.268536	0.570438	1.2006	2.50981	5.21953	10.8104	12.0513	13.4341	14.9752	16.6926	18.6063	20.7388	23.1151	25.7628	28.7131	32.0003	35.6628	39.7435	44.29	49.3552	54.9984	61.2853	68.2891	71.9036	75.7095	79.7168	83.9362	88.3788	93.0566	97.982	103.168	108.629	114.378	120.432	127.158	134.26	141.759	149.676	158.036	163.531	169.218	175.102
24	548	Vanuatu	0	0	0	0	0	0	0	0	0	0	0	0	0	0	0	0	0	0	0	0	0	0	0.0274135	0.041004	0.0613309	0.091732	0.137199	0.205197	0.215933	0.227231	0.23912	0.251632	0.264797	0.278651	0.293231	0.308572	0.324717	0.341706	0.359584	0.379448	0.400409	0.422528	0.445869	0.470499	0.486578	0.503207	0.520403
24	554	New Zealand	0	0	0	0	0	0	0	0	0	0	0	0	0	0	0	0	0	0	0	0	0	0	84.1894	105.549	105.859	424.669	745.317	1067.79	1002.62	992.971	983.419	973.958	964.589	955.309	946.118	937.016	928.001	919.072	910.229	1062.23	1239.62	1446.63	1688.21	1970.13	2299.14	2683.08	3578.44
4	558	Nicaragua	0	0	0	0	0	0	0	0	0	0	0	0	0	0	0	0	0	0	0	0	0	0	0	0	0	0	145.869	96.5018	105.92	116.191	127.389	139.594	152.893	167.379	183.154	200.33	219.024	239.367	264.399	291.785	355.836	426.894	511.754	509.009	502.28	531.157	559.755
8	562	Niger	0	0	0	0	0	295.354	385.972	503.743	656.486	854.106	1109.05	1263.98	1440.53	1641.69	1870.9	2132.06	2429.61	2768.63	3154.86	3320.28	3484.59	3734.65	3983.06	4410.64	4711.04	5147.16	5986.07	6819.43	6942.49	6998.59	7057.71	7120.17	7186.32	7256.57	7331.4	7411.38	7497.18	7589.63	7689.7	7798.62	7917.9	8049.49	8195.88	8360.43	8547.65	8763.96	9018.78
8	566	Nigeria	0	0	0	0	0	389.039	517.486	681.964	886.707	1128.71	1382.47	1812.47	2374.08	3106.6	4060.58	5300.83	6909.98	8992.85	11681.4	13625.9	15412.1	15958.5	16386.8	17659.9	18677.6	19389.1	23005.2	27060.5	27098.3	27010.6	26922.3	26833.7	26745	26656.3	26568.1	26480.7	26394.6	26310.6	26229.5	26152.6	26081.4	26018.2	25965.8	25928.6	25912.6	25926.8	25985.5
24	570	Niue	0	0	0	0	0	0	0	0	0	0	0.000457871	0.000678813	0.00100594	0.00149003	0.00220599	0.00326422	0.00482729	0.00713433	0.0105367	0.0155497	0.0229287	0.033778	0.0497095	0.0730705	0.10727	0.15724	0.230096	0.33604	0.352739	0.370259	0.38864	0.407924	0.428153	0.449375	0.471636	0.494987	0.519481	0.545171	0.572116	0.602044	0.633519	0.66662	0.70143	0.738035	0.776527	0.817	0.842395
24	574	Norfolk Isl.	0	0	0	0	0	0	0	0	0	0	0	0	0	0	0	0	0	0	0	0	0	0	0	0	0	0	0	0	0	0	0	0	0	0	0	0	0	0	0	0	0	0	0	0	0	0	0
11	578	Norway	0	0	0	0	0	0.417538	0.396536	0.746072	1.73065	3.1423	27.4067	29.6288	31.7361	33.7213	35.5761	37.291	38.8548	40.2545	41.4745	42.4958	43.2953	56.3703	68.1589	76.5613	36.2776	68.0498	78.566	84.9301	86.8916	88.8551	90.8151	92.7653	94.6984	96.6061	98.4788	100.305	102.073	103.766	105.369	112.904	125.379	137.75	152.574	167.904	178.893	184.385	189.671
24	580	Northern Mariana	0	0	0	0	0	0	0	0	0	0	0	0	0	0	0	0	0	0	0	0	0	0	0	0	0	0	0	0	0	0	0	0	0	0	0	0	0	0	0	0	0	0	0	0	0	0	0
24	583	Micr.,Fed.St.of	0	0	0	0	0	0	0	0	0	0	0	0	0	0	0	0	0	0	0	0	0	0	0	0	0	0	0	0	0	0	0	0	0	0	0	0	0	0	0	0	0	0	0	0	0	0	0
24	584	Marshall Islands	0	0	0	0	0	0	0	0	0	0	0	0	0	0	0	0	0	0	0	0	0	0	0	0	0	0	0	0	0	0	0	0	0	0	0	0	0	0	0	0	0	0	0	0	0	0	0
24	585	Palau	0	0	0	0	0	0	0	0	0	0	0.0348497	0.043634	0.054632	0.0684016	0.085641	0.107224	0.134246	0.168077	0.210431	0.263456	0.32984	0.412948	0.516993	0.647247	0.810313	1.01445	1.27001	1.58995	1.67388	1.76225	1.85528	1.95323	2.05634	2.1649	2.27918	2.39951	2.52618	2.65954	2.79994	2.95594	3.12063	3.2945	3.47805	3.67184	3.79902	3.93062	4.06677
18	586	Pakistan	0	0	0	0	0.287594	0.958645	3.19548	10.6516	35.5054	118.351	394.504	847.024	889.41	940.381	988.14	1032.46	1073.09	1161.11	1242.21	1354.74	1456.66	1464.43	1464.87	1406.02	1519.61	1530.99	1864.92	2116.87	2118.79	2141.48	2163.8	2185.69	2207.11	2227.98	2248.24	2267.81	2286.6	2304.52	2321.47	2337.34	2351.99	2365.3	2377.1	2387.22	2395.45	2401.59	2405.36
4	591	Panama	0	0	0	0	0	0	0	0	0	0	0	0	0	0	0	0	0	0	0	0	0	0	0	0	0	0	65.5437	43.3615	46.7584	50.3927	54.2801	58.4371	62.8813	67.6314	72.7074	78.1303	83.9227	90.1083	97.7852	112.569	129.478	148.807	170.892	184.415	194.66	198.268	213.296
22	598	Papua New Guinea	0	0	0	0	0	33.0113	47.0232	66.3488	92.3328	125.706	164.385	169.238	174.067	178.842	183.527	188.077	192.439	196.55	200.328	203.674	206.465	208.54	209.69	209.635	207.981	204.152	197.236	185.626	183.861	182.019	180.094	178.081	175.973	173.763	171.442	169.002	166.432	163.719	160.85	157.808	154.573	151.121	147.423	143.444	138.952	134.087	128.772
6	600	Paraguay	0	0	0	0	0	0	0	0	0	0	0	0	0	0	0	0	0	0	0	0	0	0	0	0	0	0	953.818	955.73	1005.53	1055.52	1105.71	1156.1	1206.68	1257.46	1308.44	1359.62	1411	1462.58	1660.92	1860.04	2059.95	2260.66	2462.16	2565.78	2669.81	2774.24	2879.07
6	604	Peru	0	0	0	0	0	0	0	0	0	0	0	0	0	0	0	0	0	0	0	0	0	0	0	0	0	0	1389.66	2122.28	2150.6	2178.07	2204.69	2230.48	2255.45	2279.63	2303.01	2325.63	2347.49	2368.6	2415.48	2461.06	2946.27	3462.48	4066.06	4381.7	4620.19	5070.28	6162.02
21	608	Philippines	0	0	0	0	0	16.7769	19.1183	21.5801	24.0247	26.166	27.3719	26.8989	26.4086	25.8994	25.3694	24.8162	24.2372	23.6292	22.9881	22.3092	21.5861	37.4601	51.9316	64.802	75.8008	84.5401	124.716	174.996	183.41	191.479	199.186	206.513	213.442	219.949	226.011	231.601	236.686	241.231	245.195	248.531	279.628	326.896	381.304	443.913	500.748	549.292	590.592
24	612	Pitcairn	0	0	0	0	0	0	0	0	0	0	0	0	0	0	0	0	0	0	0	0	0	0	0	0	0	0	0	0	0	0	0	0	0	0	0	0	0	0	0	0	0	0	0	0	0	0	0
12	616	Poland	0	0	0	0	0	15.0291	23.7872	37.2927	86.4964	125.613	547.555	591.91	633.96	725.372	812.047	695.063	581.884	756.403	919.883	1004.34	1079.82	1249.34	1798.74	2670.23	2528.84	2708.1	3122.08	3366.21	3462.3	3578.96	3697.46	3817.57	3938.97	4061.26	4184	4306.63	4428.49	4548.78	4666.55	4780.64	4957.84	5234.01	5513.59	6142.49	6707.75	7608.4	8393.83
11	620	Portugal	0	0	0	0	0	45.4076	64.6845	91.2753	127.035	172.984	226.292	247.108	242.622	237.965	233.117	205.253	178.213	173.767	169.082	205.151	238.261	287.22	330.92	438.789	299.36	410.286	604.274	560.124	719.681	733.783	739.381	744.579	749.33	754.622	759.322	763.362	766.664	769.14	768.984	768.044	791.071	815.003	814.745	850.912	893.119	935.73	990.191
8	624	Guinea-Bissau	0	0	0	0	0	1.96113	3.11759	4.91341	7.69432	11.9899	18.6107	21.3383	24.4648	28.0487	32.1566	36.865	42.2616	48.4468	55.5358	63.6603	72.9714	83.6422	95.8709	109.885	125.944	144.346	165.434	189.597	192.577	195.73	199.073	202.629	206.42	210.477	214.832	219.526	224.607	230.135	236.182	242.838	250.219	258.473	267.796	278.451	290.806	305.392	323.01
21	626	East Timor	0	0	0	0	0	0.517888	0.625566	0.752673	0.901142	1.072	1.26424	1.57019	1.94993	2.42119	3.00594	3.73138	4.63121	5.74715	7.13083	8.84615	10.9721	13.6066	16.8702	20.9125	25.9177	32.1136	39.7812	49.2672	50.1323	51.0124	51.9079	52.8189	53.7458	54.6888	55.6482	56.6243	57.6173	58.6276	59.6554	64.7798	70.3442	76.3863	82.9472	90.0713	93.8947	97.8801	102.034
4	630	Puerto Rico	0	0	0	0	0	0	0	0	0	0	0	0	0	0	0	0	0	0	0	0	0	0	0	0	0	0	1.55737	2.29024	2.92574	3.73758	4.77469	6.09957	7.79208	9.95424	12.7163	16.2449	20.7525	26.511	33.8672	43.2647	51.2124	58.8318	72.4675	86.6506	101.874	116.801	130.867
17	634	Qatar	0	0	0	0	0	0.21082	0.332394	0.520683	0.811567	1.25995	1.94978	2.023	2.09892	2.17762	2.25922	2.34383	2.43154	2.52247	2.61674	2.71447	2.81579	2.92082	3.02971	3.14258	3.2596	3.38089	3.50663	8.84361	9.28819	9.75512	10.2455	10.7606	11.3015	11.8696	12.4663	13.093	13.7512	14.4424	15.1684	15.9504	16.7727	17.6373	18.5465	19.5026	19.7046	19.9087	20.115
9	638	Reunion	0	0	0	0	0	0.0111702	0.0159112	0.0224499	0.0312406	0.0425296	0.055608	0.0683079	0.0838275	0.102763	0.125822	0.153846	0.187816	0.228875	0.278324	0.337618	0.408328	0.492059	0.590284	0.704021	0.833223	0.97559	1.1241	1.26127	1.49396	1.76865	2.09265	2.47445	2.92393	3.45247	4.07319	4.80113	6.04683	7.23593	8.2948	9.24662	9.88989	11.2471	11.4737	16.7094	17.9864	17.1242	15.1464
12	642	Romania	0	0	0	0	0	23.6888	39.7463	66.6884	201.408	337.933	544.321	523.385	503.255	423.412	348.966	307.582	268.865	567.844	1042.37	1672.94	2028.01	2903.75	2554.22	2823.09	2714.51	3136.76	2554.22	3102.29	3427.75	3368.3	3282.86	3168.03	3020.05	3095.02	3165.29	3229.81	3287.39	3336.73	3436.82	3534.2	3755.75	3815.93	3868.96	3954.93	4013.56	4047.96	4054.69
16	643	Russian Fed.	0	0	0	0	0	47.0458	109.775	256.148	597.703	1394.74	3254.77	7324.86	7993.66	8629.96	9234.6	9060.68	8902.81	9498.39	10138.9	10542.3	10880.9	15735.6	22654	22372.6	21185.9	25572.3	29475.1	30002.9	33550.5	36982.8	40294.6	43480.4	46534.1	49448.6	52216.4	54828.8	57276.1	59547.3	61629.5	64302.3	67116	77458.8	81629.3	90921.9	95312.4	105651	116357
9	646	Rwanda	0	0	0	0	0	0.974494	1.24622	1.58422	1.99786	2.49141	3.05486	4.40069	6.33759	9.12421	13.1318	18.8931	27.1719	39.063	56.1339	69.2898	82.0673	98.4983	114.404	129.759	144.538	158.711	171.62	183.876	185.751	187.513	189.385	191.376	193.5	195.774	198.214	200.844	203.689	206.78	210.156	213.865	217.967	222.537	227.678	233.522	240.253	248.135	257.557
8	654	St. Helena	0	0	0	0	0	0.000452602	0.000719033	0.00113269	0.00177313	0.00276227	0.00428661	0.00537551	0.00674082	0.00845264	0.0105989	0.0132897	0.0166631	0.0208923	0.0261941	0.0328405	0.0411722	0.0516164	0.0647083	0.0811188	0.101689	0.127471	0.159787	0.200291	0.250433	0.313128	0.391519	0.489534	0.612086	0.765319	0.956913	1.19647	1.496	1.87051	2.33879	2.92429	3.65636	4.57171	5.7162	7.1472	7.94351	8.82854	9.53048
4	659	St.Kitts & Nevis	0	0	0	0	0	0	0	0	0	0	0	0	0	0	0	0	0	0	0	0	0	0	0	0	0	0	0.787514	1.54415	1.63796	1.73747	1.84302	1.95499	2.07376	2.19974	2.33338	2.47514	2.62551	2.78501	2.95421	2.99283	3.03195	3.07158	3.24449	3.17135	3.66938	3.74298	3.92176
4	660	Anguilla	0	0	0	0	0	0	0	0	0	0	0	0	0	0	0	0	0	0	0	0	0	0	0	0	0	0	0	0	0	0	0	0	0	0	0	0	0	0	0	0	0	0	0	0	0	0	0
4	662	Saint Lucia	0	0	0	0	0	0	0	0	0	0	0	0	0	0	0	0	0	0	0	0	0	0	0	0	0	0	0.0798036	0.0853514	0.0905367	0.096037	0.101871	0.10806	0.114625	0.121589	0.128976	0.136811	0.145123	0.153939	0.163292	0.165426	0.167589	0.169779	0.171999	0.174247	0.176721	0.17923	0.181775
2	666	St.Pierre & Miq.	0	0	0	0	0	0	0	0	0	0	0	0	0	0	0	0	0	0	0	0	0	0	0	0	0	0	0	0	0	0	0	0	0	0	0	0	0	0	0	0	0	0	0	0	0	0	0
4	670	St.Vin. & Gren.	0	0	0	0	0	0	0	0	0	0	0	0	0	0	0	0	0	0	0	0	0	0	0	0	0	0	0.211058	0.41384	0.438982	0.465651	0.49394	0.523948	0.555779	0.589544	0.62536	0.663352	0.703652	0.7464	0.791746	0.802095	0.81258	0.823202	0.833963	0.844864	0.85686	0.869027	0.881366
11	674	San Marino	0	0	0	0	0	0.0517116	0.104117	0.209632	0.422079	0.849823	1.71105	1.67882	1.64719	1.61616	1.58572	1.55584	1.52653	2.99076	5.13524	7.20852	7.80222	10.1328	8.18547	6.15449	7.24626	5.34022	4.43721	4.39944	4.27665	4.12874	3.95342	3.7482	3.51043	3.53446	3.55129	3.5601	3.56001	3.55004	3.52861	3.4951	3.44828	3.38686	3.30941	3.21444	3.10029	2.96523	2.80737
8	678	Sao Tome & Pr.	0	0	0	0	0	0	0	0	0	0	0	0	0	0	0	0	0	0	0	0	0	0	0	0	0	0	0	0	0	0	0	0	0	0	0	0	0	0	0	0	0	0	0	0	0	0	0
17	682	Saudi Arabia	0	0	0	0	0	0.709799	1.33087	2.49539	4.67885	8.77285	16.4491	23.9543	34.884	50.8005	73.9793	107.734	156.89	192.19	235.334	269.654	306.425	397.076	513.9	664.32	729.405	935.135	1315.03	1461.15	1833.36	2300.36	2886.27	3621.36	4543.61	5700.64	7152.22	8973.3	11257.9	14124	17719.5	22230	28657.8	36553.4	46624.2	47595.8	48587.6	50142.4	51893.2
8	686	Senegal	0	0	0	0	0	62.7989	79.5158	99.7304	123.369	149.304	173.561	213.206	261.656	320.772	392.771	480.274	586.358	714.591	869.05	1054.29	1275.25	1536.97	1844.11	2199.95	2604.5	3050.9	3517.8	3951.93	3956.95	3962.28	3967.97	3974.05	3980.59	3987.63	3995.25	4003.54	4012.61	4022.6	4033.68	4046.06	4060.02	4075.95	4094.36	4115.95	4141.77	4173.35	4213.14
9	690	Seychelles	0	0	0	0	0	0	0	0	0	0	0	0	0	0	0	0	0	0	0	0	0	0	0	0	0	0	0	0	0	0	0	0	0	0	0	0	0	0	0	0	0	0	0	0	0	0	0
8	694	Sierra Leone	0	0	0	0	0	0.239145	0.333676	0.463042	0.639817	0.881032	1.20974	1.34793	1.50186	1.67334	1.86435	2.07713	2.31413	2.57812	2.87217	3.19968	3.56447	3.97077	4.4233	4.9273	5.48862	6.11376	6.80999	7.58536	8.43025	9.36925	10.4128	11.5727	12.8617	14.2942	15.8864	17.6558	19.6224	21.808	24.237	26.9366	29.9368	33.2713	36.9771	41.0956	63.942	99.4896	154.799
21	702	Singapore	0	0	0	0	0	0	0	0	0	0	0	0	0	0	0	0	0	0	0	0	0	0	0	0	0	0	0	0	0	0	0	0	0	0	0	0	0	0	0	0	0	0	0	0	0	0	0
12	703	Slovakia	0	0	0	0	0	14.2128	23.8469	40.0116	67.1335	112.64	188.994	181.906	175.085	168.52	162.2	156.118	150.264	288.795	486.44	752.823	887.256	1355.08	1430.36	1580.93	1520.12	1317.44	1609.16	1416.57	1361.57	1299.73	1230.57	1153.59	1068.29	1063.53	1056.6	1047.33	1035.55	1021.06	1019.85	1036.18	1050.74	1063.26	1073.43	1080.94	1064.32	1044.65	1021.7
21	704	Viet Nam	0	0	0	0	0	15.3635	19.556	24.6749	30.7338	37.4951	44.0244	46.5837	49.2466	52.0083	54.8618	57.7969	60.7993	63.8495	66.9211	68.6281	69.9915	87.8648	104.001	118.16	130.014	139.107	161.551	176.373	191.628	206.446	220.808	234.699	248.097	260.981	273.329	285.113	296.307	306.877	316.788	326.002	358.872	389.999	419.266	446.538	471.656	555.843	634.1
12	705	Slovenia	0	0	0	0	0	8.70221	13.9139	22.2469	35.5704	56.8734	90.9345	90.6755	90.4171	90.1595	89.9027	89.6465	89.3911	177.988	310.591	443.093	487.402	643.305	528.146	403.573	482.908	361.684	305.422	307.758	295.81	282.374	267.348	250.625	232.092	231.058	229.552	227.539	224.979	221.831	224.14	230.571	236.958	243.272	249.482	255.55	273.147	291.562	310.765
9	706	Somalia	0	0	0	0	0	578.559	839.294	1213	1744.92	2495.04	3539.03	3772.23	4020.34	4284.25	4564.92	4863.34	5180.58	5517.73	5875.97	6157.87	6434.4	7663.33	8871.92	10059.7	11226	12370.5	13032.5	13679.4	13829	13978.2	14127.2	14275.9	14424.2	14572.2	14719.9	14867.3	15014.4	15161.2	15307.7	15453.8	16345.3	17010.7	17703.2	18423.9	19375.7	20376.6	21429.1
10	710	South Africa	0	0	0	0	0	0	0.132792	0.368903	1.09346	3.57062	13.6909	16.4534	19.8368	23.9991	29.1449	35.5408	43.5375	53.6011	66.358	81.8339	100.781	137.6	184.286	244.26	322.5	426.446	602	4203.91	4452.56	4688.58	4911.97	5122.72	5320.83	5506.31	5679.16	5839.37	5986.95	6121.89	6244.2	6353.87	6450.91	6054.92	6851.28	8106.61	10301.2	19493.9	22832.4
10	716	Zimbabwe	0	0	0	0	0	0	0	0	0.520486	1.04097	2.99356	3.70039	4.58877	5.71025	7.13276	8.94657	11.2727	14.2749	18.1771	23.9585	31.0885	35.3717	40.6053	47.0926	55.2684	131.548	172.703	910.353	999.57	1093.73	1192.11	1295.16	1403.38	1517.39	1637.89	1765.71	1901.89	2047.65	2204.5	2374.34	2559.57	2560.16	2566	2578.68	2600.48	2634.76	2686.76
11	724	Spain	0	0	0	0	0	95.2018	190.404	380.807	761.614	1523.23	3240.99	3349.07	3453.03	3245.11	3039.39	2669.14	2305.57	2355.2	2400.6	2441.25	2476.56	2733.58	3271.44	4357.31	3111.26	3565.47	4495.87	4047.1	4543.97	4646.05	4749.77	4855.1	4962.01	5070.44	5180.35	5291.68	5404.35	5518.27	5633.36	5749.48	6099.93	6044.53	6548.34	7157.8	7478.2	7808.27	8094.35
7	732	Western Sahara	0	0	0	0	0	0	0	0	3.17235e-05	6.34469e-05	0.000118963	0.000223056	0.000418229	0.00078418	0.00147034	0.00275688	0.00516915	0.00969216	0.0181728	0.034074	0.0638888	0.119791	0.224609	0.421142	0.789641	1.48058	2.77608	5.20515	6.5282	8.18754	10.2687	12.8788	16.1523	20.2579	25.407	31.865	39.9645	50.1227	62.8629	79.2389	99.881	125.9	158.698	157.704	158.398	158.88	159.106
9	736	Sudan	0	0	0	0	0	506.525	1013.05	2026.1	4052.2	8104.41	27117.4	56042.7	56885.6	57682.9	58425.1	59101.2	59698.5	60201.5	60591.7	63413.7	65851.4	65738.2	65295.8	67723.6	69369.9	70068.7	70112.7	68448.7	68289.3	68032.2	67772	67508.7	67242.7	66974.4	66704.1	66432.7	66161	65890.2	65622.1	65358.8	65103.5	64860.5	64635.8	64438.1	64280.2	64181.5	64172.2
6	740	Suriname	0	0	0	0	0	0	0	0	0	0	0	0	0	0	0	0	0	0	0	0	0	0	0	0	0	0	0.233048	0.336386	0.375928	0.41988	0.468716	0.522962	0.583197	0.650061	0.724264	0.806584	0.897887	0.999124	1.12367	1.24006	1.36735	1.50649	1.65853	1.6648	1.72512	1.77829	1.82198
11	744	Svalbard & Jan Mayen Isl.	0	0	0	0	0	0	0	0	0	0	0	0	0	0	0	0	0	0	0	0	0	0	0	0	0	0	0	0	0	0	0	0	0	0	0	0	0	0	0	0	0	0	0	0	0	0	0
10	748	Swaziland	0	0	0	0	0	0	0.0173864	0.0362253	0.0805311	0.197227	0.567172	0.615505	0.670099	0.732076	0.802817	0.884043	0.977917	1.08719	1.21539	1.49885	1.84588	2.52024	3.37532	4.4738	5.90682	7.81066	11.0261	76.9976	96.7867	112.764	130.768	151.032	173.812	199.393	228.091	260.256	296.273	336.571	381.625	431.957	488.149	510.349	532.791	555.351	577.882	600.208	622.124
11	752	Sweden	0	0	0	0	0	0.418052	0.794439	1.49575	3.47325	15.7929	55.2871	59.8022	64.0942	68.1494	71.9525	75.4857	78.7285	81.657	84.2429	86.4523	88.2437	100.229	110.888	216.464	81.2637	89.8655	126.543	207.042	213.117	215.234	237.532	249.391	254.123	271.335	284.915	290.572	298.209	316.082	317.212	335.626	369.118	394.157	429.319	465.407	496.878	534.293	546.137
11	756	Switzerland	0	0	0	0	0	1.30555	3.28578	6.61567	13.3201	40.2286	202.493	194.9	187.591	180.557	173.786	167.269	160.997	309.423	521.185	716.974	760.505	1290.55	1277.11	1505.65	1302.96	1254.71	1277.11	1551.46	1473.57	1389.98	1300.43	1204.65	1102.36	1084.45	1064.62	1042.79	1018.84	992.689	991.977	1073.67	1129.5	1180.84	1230.46	1248.63	1282.36	1312.07	1308.39
17	760	Syrian Arab Rep.	0	0	0	108.217	177.554	285.81	454.416	716.248	1121.72	1748.06	2713.47	3694.52	5030.1	6848.29	5438.65	4319.05	3429.83	2723.6	2162.74	3953.89	1919.75	2032.7	2146.24	2260.37	1812.77	1947.8	2279.79	2299.07	2313.05	2327.03	2341.03	2355.03	2369.04	2383.05	2397.07	2411.1	2425.14	2439.18	2453.23	2467.29	2571.95	2655.65	2742.07	2831.3	2923.44	3301.33	3679.42
15	762	Tajikistan	0	0	0	0	0	11.1971	26.1265	60.9619	142.244	331.904	774.442	1659.52	1745.65	1834.27	1925.07	2017.59	2111.27	2205.32	2298.73	2342.37	2374.37	2393.16	2496.57	2572.85	2616.73	2620.49	2727.82	2729.47	2890.42	3010.17	3133.1	3259.04	3387.76	3518.96	3652.26	3787.2	3923.18	4059.49	4195.23	4329.27	4460.24	4586.43	4705.68	4815.27	4911.72	4990.47	5045.51
21	764	Thailand	0	0	0	0	0	4.21984	11.0238	16.9762	21.8897	25.4603	55.6192	60.1466	64.4456	68.5021	72.3	75.8208	79.043	81.9413	84.486	86.641	88.3623	102.394	114.887	125.619	134.296	140.495	146.847	148.444	147.967	148.984	149.947	150.849	151.685	152.447	153.127	153.718	154.209	154.59	162.169	169.306	175.974	182.141	187.772	211.188	233.112	253.421	271.967
8	768	Togo	0	0	0	0	0	8.38762	11.5588	15.8817	21.7672	29.7709	40.6442	46.5562	53.3275	61.0826	69.9644	80.1366	91.7863	105.128	120.408	137.906	157.945	180.893	207.173	237.267	271.729	311.193	356.384	408.132	409.581	411.034	412.493	413.957	415.426	416.901	418.38	419.865	421.355	422.85	424.35	428.003	431.687	435.403	439.151	442.931	452.062	461.381	470.892
24	772	Tokelau	0	0	0	0	0	0	0	0	0	0	0	0	0	0	0	0	0	0	0	0	0	0	0	0	0	0	0	0	0	0	0	0	0	0	0	0	0	0	0	0	0	0	0	0	0	0	0
24	776	Tonga	0	0	0	0	0	0	0	0	0	0.331793	0.30442	0.314898	0.325422	0.335936	0.34637	0.356638	0.366636	0.376234	0.385271	0.393546	0.400803	0.406714	0.410844	0.587968	0.834971	1.17301	1.62157	2.18254	2.26761	2.35474	2.4438	2.53463	2.62704	2.72076	2.81548	2.91081	3.00629	3.10132	3.1952	3.29619	3.3946	3.48907	3.5779	3.6589	3.65485	3.63581	3.59808
4	780	Trin. & Tobago	0	0	0	0	0	0	0	0	0	0	0	0	0	0	0	0	0	0	0	0	0	0	0	0	0	0	0.00234083	0.00458987	0.00674981	0.00992619	0.0145973	0.0214667	0.0315686	0.0464245	0.0682713	0.100399	0.147646	0.217126	0.319303	0.469563	0.484984	0.534908	0.589972	0.737466	0.878948	1.19194	1.46072
17	784	U.Arab Emirates	0	0	0	0	0	5.18586	8.25376	13.0194	20.4014	31.8073	49.3913	51.2619	53.2016	55.213	57.2987	59.4614	61.7039	64.0292	66.4402	66.642	66.8426	67.0421	67.2403	67.4374	67.6334	67.8282	92.1587	116.625	106.82	103.882	101.024	98.2457	95.5435	92.9155	90.3599	87.8744	85.4574	83.1068	80.8208	84.9892	89.3725	93.9818	98.8289	103.926	109.426	115.217	121.315
7	788	Tunisia	0	0	0	0	0	50.8361	88.8751	154.448	267.151	460.379	790.955	892.399	994.399	947.366	900.036	852.412	804.495	806.708	960.579	988.525	1016.59	968.335	1021.99	1024.67	821.868	823.989	1032.62	828.197	828.911	841.711	855.273	869.681	885.03	901.433	919.025	937.963	958.439	980.683	1004.98	1031.69	1061.25	1094.26	1131.46	1173.88	1222.96	1280.74	1350.31
13	792	Turkey	0	0	0	0	94.3309	293.873	486.513	671.876	1318.25	1937.6	2528.14	2732.68	2936.24	2720.32	2505.32	2291.25	2078.12	2280.6	2482.07	2734.13	2984.93	2176.84	2560.81	2942.87	2364.82	2541.99	3245.64	3439.83	3479.14	3528.67	3578.9	3629.85	3681.53	3733.93	3787.09	3841	3895.68	3951.13	4007.37	4064.42	4216.92	4361.22	4510.45	4664.8	4824.42	4928.93	5028.23
15	795	Turkmenistan	0	0	0	0	8.229	19.201	44.8023	104.539	243.924	569.155	1328.03	2845.78	3006	3173.24	3347.47	3528.57	3716.35	3910.5	4110.52	4153.91	4188.4	4381.76	4556.28	4710.22	4885.9	5162.6	5814.08	6187.73	6575.59	6911.3	7263.75	7633.73	8022.09	8429.7	8857.47	9306.37	9777.37	10271.5	10789.9	11333.6	11903.9	12501.9	13129	13786.4	14475.5	15197.7	15954.6
4	796	Turks & Caicos	0	0	0	0	0	0	0	0	0	0	0	0	0	0	0	0	0	0	0	0	0	0	0	0	0	0	0	0	0	0	0	0	0	0	0	0	0	0	0	0	0	0	0	0	0	0	0
24	798	Tuvalu	0	0	0	0	0	0	0	0	0	0	0	0	0	0	0	0	0	0	0	0	0	0	0	0	0	0	0	0	0	0	0	0	0	0	0	0	0	0	0	0	0	0	0	0	0	0	0
9	800	Uganda	0	0	0	0	0	22.2929	28.1882	35.5924	44.8934	56.5782	71.2592	89.2659	111.821	140.074	175.462	219.788	275.309	344.85	431.95	504.974	578.288	680.863	783.842	887.221	990.999	1095.17	1280.21	1465.95	1480.37	1495.3	1511.03	1527.64	1545.22	1563.9	1583.79	1605.05	1627.87	1652.45	1679.08	1708.07	1739.85	1774.95	1814.05	1858.06	1908.24	1966.37	2035.07
14	804	Ukraine	0	0	0	0	0	1.80597	4.21394	9.83252	22.9425	53.5326	124.909	267.663	281.67	296.105	310.923	326.058	341.426	356.912	372.367	387.595	400.551	580.171	836.893	800.635	760.756	954.921	1108.77	1344.54	1484.88	1549.38	1616.01	1684.76	1755.59	1828.44	1903.25	1979.92	2058.29	2138.21	2219.44	2335.41	2461.1	2626.61	2695.66	3009.81	3305.01	3795.08	4342.72
12	807	TFYR Macedonia	0	0	0	0	0	6.14013	10.3022	17.2856	29.0027	48.6623	81.6481	79.6635	77.7964	75.973	74.1924	72.4535	70.7554	137.973	235.794	329.441	354.902	477.505	398.459	308.657	373.516	282.309	280.964	273.002	254.612	241.568	227.322	211.806	194.95	192.9	190.477	187.658	184.417	180.73	189.585	209.682	231.865	256.349	283.369	313.183	356.89	406.63	463.23
7	818	Egypt	0	0	0	0	0	0	0	0	0	0	0	0	0	0	0	0	0	0	0	0	0	0	0	0	0	0	0	0	0	0	0	0	0	0	0	0	0	0	0	0	0	0	0	0	0	0	0
11	826	United Kingdom	0	0	0	0	0	3.94813	3.97463	18.0059	54.3801	143.283	530.713	553.256	562.55	572	581.61	419.43	268.865	516.222	1268.22	2903.75	4309.53	8258.3	11568.7	11899.2	6297.66	6587.2	6385.55	8380.33	8297.31	8128.4	7872.59	7528.69	7095.21	7173.59	7224.98	7249.26	7246.22	7215.56	6961.92	8471.39	9327.15	10771.4	10801.7	11276.9	11986	12850.9	13476.1
10	834	U.R. Tanzania	0	0	0	0	0	141.131	189.968	257.977	353.522	488.915	682.394	811.489	965.027	1147.64	1364.85	1623.2	1930.51	2296.06	2730.91	3186.06	3641.21	5803.18	7965.15	10127.1	12289.1	7965.15	9671.96	11378.8	11532.1	11665.2	11805.9	11850.7	11898	11948.2	12001.6	12058.6	12119.7	12185.4	12256.7	12334.3	12419.4	12513.5	12618.6	12737.3	12873.5	13032.5	13222.6
2	840	United States	0	0	0	0	0	0	0	0	0	0	0	0	0	0	0	0	0	0	0	0	0	0	0	0	0	0	0	0	0	0	0	0	0	0	0	0	0	0	0	0	0	0	0	0	0	0	0
4	850	U.S. Virgin Is.	0	0	0	0	0	0	0	0	0	0	0	0	0	0	0	0	0	0	0	0	0	0	0	0	0	0	2.0626	4.04431	4.46064	4.91982	5.42627	5.98486	6.60095	7.28046	8.02991	8.85652	9.76822	10.7738	11.8828	11.6732	11.4672	11.2649	11.0662	10.8709	10.1503	9.47737	8.84908
8	854	Burkina Faso	0	0	0	0	0	222.2	316.567	446.775	621.964	847.274	1109.29	1235.71	1375.25	1528.94	1697.82	1882.83	2084.85	2304.52	2542.17	2797.67	3070.08	3357.4	3655.91	3959.28	4257.11	4532.25	4755.7	4875.08	4833.41	4818.18	4802.64	4786.79	4770.63	4754.16	4737.38	4720.32	4702.99	4685.44	4667.72	4649.93	4632.18	4614.68	4597.71	4581.71	4567.36	4555.74	4548.64
6	858	Uruguay	0	0	0	0	0	0	0	0	0	0	0	0	0	0	0	0	0	0	0	0	0	0	0	0	0	0	41.3245	60.8574	65.6249	70.7257	76.1816	82.0159	88.2533	94.92	102.044	109.655	117.785	126.466	137.241	148.799	206.731	283.444	388.329	654.586	881.651	1106.49	1508.47
15	860	Uzbekistan	0	0	0	0	8.11105	18.9258	44.1602	103.04	240.427	560.997	1308.99	2804.99	2954.04	3108.1	3266.78	3429.53	3595.61	3764.04	3933.51	3990.29	4031.66	4207.61	4353.36	4464.65	4535.86	4595.76	4935	5141.95	5427.2	5677.53	5937.94	6208.66	6489.93	6781.93	7084.86	7398.85	7724.02	8060.42	8408.05	8766.85	9136.67	9517.26	9908.26	10309.2	10719.3	11137.9	11563.7
6	862	Venezuela	0	0	0	0	0	0	0	0	0	0	0	0	0	0	0	0	0	0	0	0	0	0	0	0	0	0	588.226	973.486	1009.88	1047.05	1084.99	1123.73	1163.27	1203.63	1244.83	1286.88	1329.79	1373.58	1434	1812.72	2289.52	2889.41	3643.72	4189.5	4395.56	4587.68	4805.11
24	876	Wallis & Futuna	0	0	0	0	0	0	0	0	0	0	0	0	0	0	0	0	0	0	0	0	0	0	0	0	0	0	0	0	0	0	0	0	0	0	0	0	0	0	0	0	0	0	0	0	0	0	0
24	882	Samoa, Western	0	0	0	0	0	0	0	0	0	0	0.0023346	0.0034413	0.00506773	0.00745482	0.010953	0.0160707	0.0235427	0.0344264	0.0502358	0.0731231	0.106121	0.153451	0.220886	0.31611	0.448897	0.630617	0.871722	1.1732	1.21891	1.26572	1.31358	1.36238	1.41203	1.46238	1.51326	1.56447	1.61574	1.66677	1.71717	1.77138	1.82419	1.87487	1.92249	1.96588	2.13534	2.30985	2.48556
17	887	Yemen	0	0	0	0	0	0.0621222	0.248489	0.993956	3.97582	15.9033	63.6132	148.083	344.718	802.458	1868.02	4348.5	10122.7	10357.1	10592.5	9909.46	9221.97	8221.71	8658.27	9097.1	8501.43	9357.66	10427	9410.85	9446.67	9568.94	9692.78	9818.22	9945.29	10074	10204.4	10336.4	10470.2	10605.7	10742.9	10881.9	10996.3	11223.8	11456.1	11693.1	11935.1	12400.8	12866.7
12	891	Union of Serbia and Montenegro	0	0	0	0	0	13.5717	27.3256	55.0179	110.774	223.035	449.065	428.779	412.701	397.225	382.329	367.992	354.193	680.731	1146.61	1708.79	1951.96	2719.84	6273.17	1863.24	1672.14	1552.7	1545.3	1501.51	1442.45	1374.14	1296.58	1209.76	1113.7	1100.96	1084.97	1065.73	1043.25	1017.52	1023.64	1028.47	1032.01	1034.27	1263.28	1479.69	1683.51	1874.73	2053.35
10	894	Zambia	0	0	0	0	0	91.066	132.439	191.517	274.679	388.843	537.452	607.893	687.177	776.31	876.381	988.557	1114.07	1254.19	1410.21	1628.82	1836.14	2156.38	2455.73	2730.47	2975.43	3182.98	3295.48	3342.39	3363.88	3402.27	3442.93	3486.11	3532.11	3581.27	3634	3690.79	3752.22	3819.03	3892.11	3972.57	4061.86	4161.83	4274.98	4404.68	4555.74	4735.15	4953.69
		Total	0	0	0	378.155	6435.16	19611.3	32841.1	52889.9	85958.6	112083	204170	207917	215812	216155	230855	248838	271308	289529	314365	349543	368293	449748	500775	512012	486368	518001	581908	663592	665775	684762	699446	718281	747254	772563	800889	847561	881895	903545	961952	997252	1.05709e+06	1.11233e+06	1.16266e+06	1.20552e+06	1.21066e+06	1.28122e+06	1.38128e+06
Total grazing land estimate, in 1000 ha			-10000	-9000	-8000	-7000	-6000	-5000	-4000	-3000	-2000	-1000	0	100	200	300	400	500	600	700	800	900	1000	1100	1200	1300	1400	1500	1600	1700	1710	1720	1730	1740	1750	1760	1770	1780	1790	1800	1810	1820	1830	1840	1850	1860	1870	1880	1890
	1	Canada	0	0	0	0	0	0	0	0	0	0	0	0	0	0	0	0	0	0	0	0	0	0	0	0	0	0	0	0	0	0	0	0	0	0	40.9169	61.3753	92.063	138.095	225.502	338.253	507.38	761.07	1141.61	1712.41	2574.71	3137.2	4012.63
	2	USA	0	0	0	0	0	0	0	0	0	0	0	0	0	0	0	0	0	0	0	0	0	0	0	0	0	0	0	0	0	0	0	0	0	0	0	0	0	0	0	0	0	0	0	0	0	0	0
	3	Mexico	0	0	0	0	0	0	0	0	0	0	0	0	0	0	0	0	0	0	0	0	0	0	0	0	0	0	5903.48	11807	12546.9	13253.2	13927.1	14569.4	15181.1	15763.3	16316.8	16842.5	17341.4	17814.2	18261.8	18685	19084.6	19461.3	19815.9	20149.2	20461.7	20754.2	24947.7
	4	Rest Central America	0	0	0	0	0	4.02497e-07	7.64762e-07	1.43956e-06	2.67338e-06	4.85977e-06	8.49751e-06	1.6709e-05	3.28256e-05	6.44222e-05	0.000126289	0.00024725	0.000483367	0.000943389	0.00183766	0.00357152	0.00692263	0.0133744	0.0257357	0.0492717	0	59.9123	647.788	565.303	599.938	638.122	680.395	727.404	779.927	838.913	905.518	984.486	1073.45	1174.17	1300.78	1439.77	1782.87	2076.95	2425.12	2526.22	2641.78	2789.57	2945.77
	5	Brazil	0	0	0	0	0	0	0	0	0	0	0	0	0	0	0	0	0	0	0	0	0	0	0	0	0	0	275.905	551.81	603.273	660.342	723.804	794.593	873.826	962.842	1063.26	1177.06	1306.65	1629.75	1993.44	2411.58	2850.21	3639.85	4664.83	6002.21	7758.71	10086.2	13204.8
	6	Rest South America	0	0	0	0	0	0	0	0	0	0	0	0	0	0	0	0	0	0	0	0	0	0	0	0	0	0	9181.41	16106.1	16712.2	17347.8	18015.2	18716.8	19455.1	20232.9	21053.3	21919.4	22835	23803.8	25415.9	28979.4	33809.4	37501.9	42227.6	49769.2	54056.5	60347.3	77311.2
	7	Northern Africa	0	0	0	0	0	461.3	1227.06	2154.5	3820.99	6856.29	11394.3	11809.7	12236.2	11875.8	11522.5	11633.9	11756.4	11941	12290	13141.2	13997	12678.5	11453.9	11697.2	11152.7	11545.8	15474.1	12847.6	13003.1	13428.5	13855.3	14283.7	14713.9	15146.3	15581.1	16018.8	16459.8	16905	17355	18069.4	20486.8	22914.4	25354.2	27766.8	30189	32621	35260.6
	8	Western Africa	0	0	0	0	0	1099.7	2918.23	5127.85	7848.45	12068.8	15494.4	17980.3	20926.9	24432.1	28616.4	33628.4	39650.7	46907.4	55671.3	61111.3	66450	71916.1	77236.4	84137	91967.3	98454.6	109211	119320	120216	120311	120441	120623	120893	121318	122034	123314	125704	130309	139361	139988	140704	141529	142489	143619	145005	146693	148797
	9	Eastern Africa	0	0	0	0	0	2528.47	3694.43	5579.05	8746.2	14260.2	35066.8	65086.8	67220	69544.4	72103.5	74956.4	78187.2	81922.9	86366.2	90781.3	94701.1	97805.2	100376	105637	109837	113546	116485	116938	117390	117505	117621	117739	117860	117987	118120	118264	118420	118594	118790	119014	122789	126299	129738	133173	136825	140549	144397
	10	Southern Africa	0	0	0	0	0	236.893	329.257	459.837	649.967	925.049	1363.12	1593.68	1866.24	2189.62	2575.04	3037.11	3595.35	4276.72	5119.78	6166.41	7332.22	10382.5	13561.6	16918.2	20646.1	18357	22497.7	65524.7	57360.1	61670.5	66176.9	70789.1	75619.6	80684.6	86002.3	91593.3	97480.9	103692	110258	117216	124625	126048	128779	132098	135148	145276	149692
	11	Western Europe	0	0	0	0	0	310.148	592.442	1134.98	2562.53	5292.86	14355.9	14867.1	15239	14036.1	12880.6	10949.9	9005.02	14485.3	23059.9	33983.2	40086.6	60549	69576.5	77835.4	58356.5	59823.9	63781.3	73343.5	72731.1	70579.3	67995.5	64954.4	61456.4	61476.1	61336.7	61327.6	61368.5	60982.4	61883.3	64638.7	67791.4	70684.6	70659.6	71040.9	71605.2	73102.9	73502.6
	12	Central Europe	0	0	0	0	0	135.026	227.928	495.205	1043.54	1885.69	3712.29	4113.94	4187.08	4109.36	4038.55	3774.97	3525.29	5697.06	8808.85	12811.7	14941.8	20678.1	23828.8	20308.6	19179.7	18179.7	18913.9	18735.6	18947.1	18757.4	18491.4	18147.5	17723.5	18154	18589.9	19033.4	19487.2	19953.7	20605.6	21260.1	22602.7	23866.1	25046	26627.9	27855.5	29373	30673.2
	13	Turkey	0	0	0	0	94.3309	293.873	486.513	671.876	1318.25	1937.6	2528.14	2732.68	2936.24	2720.32	2505.32	2291.25	2078.12	2280.6	2482.07	2734.13	2984.93	2176.84	2560.81	2942.87	2364.82	2541.99	3245.64	3439.83	3479.14	3528.67	3578.9	3629.85	3681.53	3733.93	3787.09	3841	3895.68	3951.13	4007.37	4064.42	4216.92	4361.22	4510.45	4664.8	4824.42	4928.93	5028.23
	14	Ukraine +	0	0	0	0	0	11.9493	15.4617	22.1912	47.4765	90.032	191.427	399.907	425.399	450.787	475.986	488.881	501.883	526.303	549.915	572.436	591.61	856.975	1236.3	1182.89	1124.16	1411.4	1639.34	1989.01	2195.81	2310.8	2431.17	2557.08	2688.63	2825.94	2969.06	3118.03	3272.83	3433.38	3599.51	3804.66	4023.8	4286.9	4457.5	4876.83	5280.39	5881.31	6541.37
	15	Asia-Stan	0	0	0	0	44.7482	115.61	269.756	629.43	1468.67	3426.89	7996.09	17134.5	18222.7	19372.5	20586.2	21865.8	23212.7	24628.2	26112.8	26631.6	27104.2	27950.4	28810.1	30922.3	33264	35778.7	40014.5	43635.4	44371.3	44981.1	45625.5	46305.2	47020.9	47773.3	48562.9	49390	50254.7	51156.9	52096.3	53071.9	54082.5	55126.2	56200.3	57301.2	58423.8	66173	72735.3
	16	Russia +	0	0	0	0	0	51.613	120.432	281.014	713.064	1644.8	3838.25	8575.17	9309.15	10012.6	10686	10582.3	10495.6	11162.7	11874.3	12322.7	12696.8	18363.1	26018.7	26391.2	24231.5	29145.2	33432.6	34161.7	36239.6	39854.8	43360.4	46751.1	50021	53163.5	56171.1	59035.2	61745.8	64291.6	66659.2	69627.1	72744.1	83396.5	87880	97485	102182	112814	123789
	17	Middle East	0	0	0	378.155	806.569	1484.03	2571.39	3778.7	5260.57	7020.33	12166.4	13732.1	15813.4	18681.1	18525.6	20101.3	25249.2	24237.1	23399	24789	22351.9	21933.1	22909	20375.3	19842.2	21571.7	25642.5	24695.2	25545.8	26380.1	27339.8	28455.5	29765.2	31316.7	33169.9	35399.9	38101	41391.1	45445.2	50430.3	57895.6	66923.8	78137.8	80263.5	82481.9	87676.2	93092
	18	India +	0	0	0	0	0.366616	1.73357	6.54898	107.016	248.048	558.562	1368.48	2829.65	3460.58	4520.84	6511.55	10366.3	10506.3	10471.7	10429.5	10490.4	10538.8	11025.1	11504.7	9236.7	9826.51	10315.6	12351.5	13213.8	13482.9	13757.4	14035.8	14318	14604.2	14894.2	15188.2	15486.1	15788	16093.9	16403.8	16654	17223.4	17783.2	18771.5	19696.5	20665.1	21699	23350.5
	19	Korea	0	0	0	0	0	27.4662	32.6027	38.3333	44.4519	50.4273	54.9411	71.643	93.4522	121.925	159.083	207.542	270.675	352.809	459.455	501.585	539.209	623.755	798.101	571.079	630.751	675.108	777.675	872.166	946.22	993.793	1043.23	1094.51	1147.61	1202.45	1258.95	1316.98	1376.37	1436.87	1498.17	1559.88	1542.68	1506.52	1467.79	1434.72	1397.61	1350.19	1299.82
	20	China +	0	0	0	0	5489.15	12730.7	20160.6	32160.5	51654.2	55202.7	93404.8	45631.3	42396.1	32438.6	37856.5	42896.7	50980.1	47941	44771.7	50312	50856.8	89488	107318	100006	79409.6	90972.9	95636.8	97602	100944	110392	115741	125515	145512	156836	170491	201204	214929	213107	241009	248463	269362	283971	296516	295767	259629	259968	269920
	21	Southeastern Asia	0	0	0	0	0	53.331	92.641	117.553	161.603	234.643	339.349	362.602	386.135	410.128	434.845	460.675	488.182	518.185	551.861	577.596	601.362	713.428	816.138	861.366	946.753	1016.88	1161.94	1017.41	1049.06	1081.39	1112.81	1143.28	1172.75	1201.16	1228.48	1254.62	1279.51	1303.07	1364.54	1428.11	1543.72	1673.99	1809.23	1997.75	2100.49	2333.3	2553.35
	22	Indonesia +	0	0	0	0	0	52.6485	71.7344	97.4451	321.903	556.413	798.917	845.762	890.691	933.734	974.91	1014.23	1051.7	1087.29	1120.99	1152.74	1182.47	1271.73	1356.27	1435.92	1740.84	2031.09	2161.68	2338.13	2316.38	2294.5	2272.5	2250.39	2228.17	2286.32	2341.21	2392.91	2441.53	2487.15	2566.28	2641.13	2711.81	2778.42	2841.06	3510.48	4151.96	4766.43	5354.62
	23	Japan	0	0	0	0	0	16.4916	23.4909	33.1439	46.1212	62.7855	82.0873	134.445	184.788	284.774	380.369	558.093	726.734	1062.7	1263.55	1426.79	1294.17	1289.17	1277.04	1389.73	1676.14	2076.18	2644.46	3726.61	3995.09	3941.13	3885.65	3828.54	3769.68	3683.33	3595.79	3506.93	3416.57	3324.54	3346.82	3361.67	3368.38	3366.12	3353.86	3368.29	3367.29	3469.79	3613.91
	24	Oceania	0	0	0	0	0	0.292891	0.599358	1.23462	2.54946	8.47224	14.4305	16.0169	17.7796	19.7387	21.9169	24.3396	27.0355	30.0376	33.3833	37.1159	41.2858	45.9522	135.402	162.834	170.048	496.741	826.423	1159.26	1098.84	1094.19	1089.91	1086	1082.48	1079.36	1076.67	1074.42	3818.66	6565.19	8496.87	10095.6	11329.8	12362.6	14358.8	20648	32020.6	45408	69243.6
	25	Greenland	0	0	0	0	0	0	0	0	0	0	0	0	0	0	0	0	0	0	0	0	0	0	0	0	0	0	0	0	0	0	0	0	0	0	0	0	0	0	0	0	0	0	0	0	0	0	0
	26	Antarctica	0	0	0	0	0	0	0	0	0	0	0	0	0	0	0	0	0	0	0	0	0	0	0	0	0	0	0	0	0	0	0	0	0	0	0	0	0	0	0	0	0	0	0	0	0	0	0
		HYDE																			314365			449747			486367			663591
		HYDE lower
		HYDE upper
		Williams' theory
		Williams' theory - 50%
		Williams' theory + 50%
		FAO
		Pongratz et al (2008), lower																			80000
		Pongratz et al (2008)																			140000			198000			227000			370000
		Pongratz et al (2008), upper																			210000
Total grazing land estimate, in Mha			-10000	-9000	-8000	-7000	-6000	-5000	-4000	-3000	-2000	-1000	0	100	200	300	400	500	600	700	800	900	1000	1100	1200	1300	1400	1500	1600	1700	1710	1720	1730	1740	1750	1760	1770	1780	1790	1800	1810	1820	1830	1840	1850	1860	1870	1880	1890
	1	Canada	0	0	0	0	0	0	0	0	0	0	0	0	0	0	0	0	0	0	0	0	0	0	0	0	0	0	0	0	0	0	0	0	0	0	0.0409169	0.0613753	0.092063	0.138095	0.225502	0.338253	0.50738	0.76107	1.14161	1.71241	2.57471	3.1372	4.01263
	2	USA	0	0	0	0	0	0	0	0	0	0	0	0	0	0	0	0	0	0	0	0	0	0	0	0	0	0	0	0	0	0	0	0	0	0	0	0	0	0	0	0	0	0	0	0	0	0	0
	3	Mexico	0	0	0	0	0	0	0	0	0	0	0	0	0	0	0	0	0	0	0	0	0	0	0	0	0	0	5.90348	11.807	12.5469	13.2532	13.9271	14.5694	15.1811	15.7633	16.3168	16.8425	17.3414	17.8142	18.2618	18.685	19.0846	19.4613	19.8159	20.1492	20.4617	20.7542	24.9477
	4	Rest Central America	0	0	0	0	0	4.02497e-10	7.64762e-10	1.43956e-09	2.67338e-09	4.85977e-09	8.49751e-09	1.6709e-08	3.28256e-08	6.44222e-08	1.26289e-07	2.4725e-07	4.83367e-07	9.43389e-07	1.83766e-06	3.57152e-06	6.92263e-06	1.33744e-05	2.57357e-05	4.92717e-05	0	0.0599123	0.647788	0.565303	0.599938	0.638122	0.680395	0.727404	0.779927	0.838913	0.905518	0.984486	1.07345	1.17417	1.30078	1.43977	1.78287	2.07695	2.42512	2.52622	2.64178	2.78957	2.94577
	5	Brazil	0	0	0	0	0	0	0	0	0	0	0	0	0	0	0	0	0	0	0	0	0	0	0	0	0	0	0.275905	0.55181	0.603273	0.660342	0.723804	0.794593	0.873826	0.962842	1.06326	1.17706	1.30665	1.62975	1.99344	2.41158	2.85021	3.63985	4.66483	6.00221	7.75871	10.0862	13.2048
	6	Rest South America	0	0	0	0	0	0	0	0	0	0	0	0	0	0	0	0	0	0	0	0	0	0	0	0	0	0	9.18141	16.1061	16.7122	17.3478	18.0152	18.7168	19.4551	20.2329	21.0533	21.9194	22.835	23.8038	25.4159	28.9794	33.8094	37.5019	42.2276	49.7692	54.0565	60.3473	77.3112
	7	Northern Africa	0	0	0	0	0	0.4613	1.22706	2.1545	3.82099	6.85629	11.3943	11.8097	12.2362	11.8758	11.5225	11.6339	11.7564	11.941	12.29	13.1412	13.997	12.6785	11.4539	11.6972	11.1527	11.5458	15.4741	12.8476	13.0031	13.4285	13.8553	14.2837	14.7139	15.1463	15.5811	16.0188	16.4598	16.905	17.355	18.0694	20.4868	22.9144	25.3542	27.7668	30.189	32.621	35.2606
	8	Western Africa	0	0	0	0	0	1.0997	2.91823	5.12785	7.84845	12.0688	15.4944	17.9803	20.9269	24.4321	28.6164	33.6284	39.6507	46.9074	55.6713	61.1113	66.45	71.9161	77.2364	84.137	91.9673	98.4546	109.211	119.32	120.216	120.311	120.441	120.623	120.893	121.318	122.034	123.314	125.704	130.309	139.361	139.988	140.704	141.529	142.489	143.619	145.005	146.693	148.797
	9	Eastern Africa	0	0	0	0	0	2.52847	3.69443	5.57905	8.7462	14.2602	35.0668	65.0868	67.22	69.5444	72.1035	74.9564	78.1872	81.9229	86.3662	90.7813	94.7011	97.8052	100.376	105.637	109.837	113.546	116.485	116.938	117.39	117.505	117.621	117.739	117.86	117.987	118.12	118.264	118.42	118.594	118.79	119.014	122.789	126.299	129.738	133.173	136.825	140.549	144.397
	10	Southern Africa	0	0	0	0	0	0.236893	0.329257	0.459837	0.649967	0.925049	1.36312	1.59368	1.86624	2.18962	2.57504	3.03711	3.59535	4.27672	5.11978	6.16641	7.33222	10.3825	13.5616	16.9182	20.6461	18.357	22.4977	65.5247	57.3601	61.6705	66.1769	70.7891	75.6196	80.6846	86.0023	91.5933	97.4809	103.692	110.258	117.216	124.625	126.048	128.779	132.098	135.148	145.276	149.692
	11	Western Europe	0	0	0	0	0	0.310148	0.592442	1.13498	2.56253	5.29286	14.3559	14.8671	15.239	14.0361	12.8806	10.9499	9.00502	14.4853	23.0599	33.9832	40.0866	60.549	69.5765	77.8354	58.3565	59.8239	63.7813	73.3435	72.7311	70.5793	67.9955	64.9544	61.4564	61.4761	61.3367	61.3276	61.3685	60.9824	61.8833	64.6387	67.7914	70.6846	70.6596	71.0409	71.6052	73.1029	73.5026
	12	Central Europe	0	0	0	0	0	0.135026	0.227928	0.495205	1.04354	1.88569	3.71229	4.11394	4.18708	4.10936	4.03855	3.77497	3.52529	5.69706	8.80885	12.8117	14.9418	20.6781	23.8288	20.3086	19.1797	18.1797	18.9139	18.7356	18.9471	18.7574	18.4914	18.1475	17.7235	18.154	18.5899	19.0334	19.4872	19.9537	20.6056	21.2601	22.6027	23.8661	25.046	26.6279	27.8555	29.373	30.6732
	13	Turkey	0	0	0	0	0.0943309	0.293873	0.486513	0.671876	1.31825	1.9376	2.52814	2.73268	2.93624	2.72032	2.50532	2.29125	2.07812	2.2806	2.48207	2.73413	2.98493	2.17684	2.56081	2.94287	2.36482	2.54199	3.24564	3.43983	3.47914	3.52867	3.5789	3.62985	3.68153	3.73393	3.78709	3.841	3.89568	3.95113	4.00737	4.06442	4.21692	4.36122	4.51045	4.6648	4.82442	4.92893	5.02823
	14	Ukraine +	0	0	0	0	0	0.0119493	0.0154617	0.0221912	0.0474765	0.090032	0.191427	0.399907	0.425399	0.450787	0.475986	0.488881	0.501883	0.526303	0.549915	0.572436	0.59161	0.856975	1.2363	1.18289	1.12416	1.4114	1.63934	1.98901	2.19581	2.3108	2.43117	2.55708	2.68863	2.82594	2.96906	3.11803	3.27283	3.43338	3.59951	3.80466	4.0238	4.2869	4.4575	4.87683	5.28039	5.88131	6.54137
	15	Asia-Stan	0	0	0	0	0.0447482	0.11561	0.269756	0.62943	1.46867	3.42689	7.99609	17.1345	18.2227	19.3725	20.5862	21.8658	23.2127	24.6282	26.1128	26.6316	27.1042	27.9504	28.8101	30.9223	33.264	35.7787	40.0145	43.6354	44.3713	44.9811	45.6255	46.3052	47.0209	47.7733	48.5629	49.39	50.2547	51.1569	52.0963	53.0719	54.0825	55.1262	56.2003	57.3012	58.4238	66.173	72.7353
	16	Russia +	0	0	0	0	0	0.051613	0.120432	0.281014	0.713064	1.6448	3.83825	8.57517	9.30915	10.0126	10.686	10.5823	10.4956	11.1627	11.8743	12.3227	12.6968	18.3631	26.0187	26.3912	24.2315	29.1452	33.4326	34.1617	36.2396	39.8548	43.3604	46.7511	50.021	53.1635	56.1711	59.0352	61.7458	64.2916	66.6592	69.6271	72.7441	83.3965	87.88	97.485	102.182	112.814	123.789
	17	Middle East	0	0	0	0.378155	0.806569	1.48403	2.57139	3.7787	5.26057	7.02033	12.1664	13.7321	15.8134	18.6811	18.5256	20.1013	25.2492	24.2371	23.399	24.789	22.3519	21.9331	22.909	20.3753	19.8422	21.5717	25.6425	24.6952	25.5458	26.3801	27.3398	28.4555	29.7652	31.3167	33.1699	35.3999	38.101	41.3911	45.4452	50.4303	57.8956	66.9238	78.1378	80.2635	82.4819	87.6762	93.092
	18	India +	0	0	0	0	0.000366616	0.00173357	0.00654898	0.107016	0.248048	0.558562	1.36848	2.82965	3.46058	4.52084	6.51155	10.3663	10.5063	10.4717	10.4295	10.4904	10.5388	11.0251	11.5047	9.2367	9.82651	10.3156	12.3515	13.2138	13.4829	13.7574	14.0358	14.318	14.6042	14.8942	15.1882	15.4861	15.788	16.0939	16.4038	16.654	17.2234	17.7832	18.7715	19.6965	20.6651	21.699	23.3505
	19	Korea	0	0	0	0	0	0.0274662	0.0326027	0.0383333	0.0444519	0.0504273	0.0549411	0.071643	0.0934522	0.121925	0.159083	0.207542	0.270675	0.352809	0.459455	0.501585	0.539209	0.623755	0.798101	0.571079	0.630751	0.675108	0.777675	0.872166	0.94622	0.993793	1.04323	1.09451	1.14761	1.20245	1.25895	1.31698	1.37637	1.43687	1.49817	1.55988	1.54268	1.50652	1.46779	1.43472	1.39761	1.35019	1.29982
	20	China +	0	0	0	0	5.48915	12.7307	20.1606	32.1605	51.6542	55.2027	93.4048	45.6313	42.3961	32.4386	37.8565	42.8967	50.9801	47.941	44.7717	50.312	50.8568	89.488	107.318	100.006	79.4096	90.9729	95.6368	97.602	100.944	110.392	115.741	125.515	145.512	156.836	170.491	201.204	214.929	213.107	241.009	248.463	269.362	283.971	296.516	295.767	259.629	259.968	269.92
	21	Southeastern Asia	0	0	0	0	0	0.053331	0.092641	0.117553	0.161603	0.234643	0.339349	0.362602	0.386135	0.410128	0.434845	0.460675	0.488182	0.518185	0.551861	0.577596	0.601362	0.713428	0.816138	0.861366	0.946753	1.01688	1.16194	1.01741	1.04906	1.08139	1.11281	1.14328	1.17275	1.20116	1.22848	1.25462	1.27951	1.30307	1.36454	1.42811	1.54372	1.67399	1.80923	1.99775	2.10049	2.3333	2.55335
	22	Indonesia +	0	0	0	0	0	0.0526485	0.0717344	0.0974451	0.321903	0.556413	0.798917	0.845762	0.890691	0.933734	0.97491	1.01423	1.0517	1.08729	1.12099	1.15274	1.18247	1.27173	1.35627	1.43592	1.74084	2.03109	2.16168	2.33813	2.31638	2.2945	2.2725	2.25039	2.22817	2.28632	2.34121	2.39291	2.44153	2.48715	2.56628	2.64113	2.71181	2.77842	2.84106	3.51048	4.15196	4.76643	5.35462
	23	Japan	0	0	0	0	0	0.0164916	0.0234909	0.0331439	0.0461212	0.0627855	0.0820873	0.134445	0.184788	0.284774	0.380369	0.558093	0.726734	1.0627	1.26355	1.42679	1.29417	1.28917	1.27704	1.38973	1.67614	2.07618	2.64446	3.72661	3.99509	3.94113	3.88565	3.82854	3.76968	3.68333	3.59579	3.50693	3.41657	3.32454	3.34682	3.36167	3.36838	3.36612	3.35386	3.36829	3.36729	3.46979	3.61391
	24	Oceania	0	0	0	0	0	0.000292891	0.000599358	0.00123462	0.00254946	0.00847224	0.0144305	0.0160169	0.0177796	0.0197387	0.0219169	0.0243396	0.0270355	0.0300376	0.0333833	0.0371159	0.0412858	0.0459522	0.135402	0.162834	0.170048	0.496741	0.826423	1.15926	1.09884	1.09419	1.08991	1.086	1.08248	1.07936	1.07667	1.07442	3.81866	6.56519	8.49687	10.0956	11.3298	12.3626	14.3588	20.648	32.0206	45.408	69.2436
	25	Greenland	0	0	0	0	0	0	0	0	0	0	0	0	0	0	0	0	0	0	0	0	0	0	0	0	0	0	0	0	0	0	0	0	0	0	0	0	0	0	0	0	0	0	0	0	0	0	0
	26	Antarctica	0	0	0	0	0	0	0	0	0	0	0	0	0	0	0	0	0	0	0	0	0	0	0	0	0	0	0	0	0	0	0	0	0	0	0	0	0	0	0	0	0	0	0	0	0	0	0
		total	0	0	0	0.378155	6.43516	19.6113	32.8411	52.8899	85.9586	112.083	204.17	207.917	215.812	216.154	230.855	248.838	271.308	289.529	314.365	349.543	368.292	449.747	500.774	512.011	486.367	518	581.907	663.591	665.774	684.76	699.444	718.279	747.251	772.56	800.884	847.556	881.889	903.538	961.944	997.243	1057.08	1112.32	1162.65	1205.5	1210.65	1281.2	1381.27
		Houghton et al (1983)																												526
HYDE 3.1 Baseline scenario
	1	North America	0	0	0	0	0	0	0	0	0	0	0	0	0	0	0	0	0	0	0	0	0	0	0	0	0	0	0	0	0	0	0	0	0	0	0.0409169	0.0613753	0.092063	0.138095	0.225502	0.338253	0.50738	0.76107	1.14161	1.71241	2.57471	3.1372	4.01263
	2	Europe	0	0	0	0	0	0.445173	0.82037	1.63018	3.60606	7.17855	18.0682	18.981	19.4261	18.1455	16.9191	14.7249	12.5303	20.1823	31.8687	46.7948	55.0284	81.2271	93.4053	98.144	77.5362	78.0035	82.6952	92.0791	91.6782	89.3367	86.4869	83.1019	79.1799	79.6301	79.9266	80.3611	80.8557	80.936	82.4889	85.8988	90.3942	94.5507	95.7055	97.6689	99.4607	102.476	104.176
	3	USSR	0	0	0	0	0.0447482	0.179172	0.405649	0.932635	2.22921	5.16173	12.0258	26.1095	27.9572	29.8359	31.7483	32.9369	34.2102	36.3172	38.537	39.5268	40.3926	47.1705	56.0651	58.4964	58.6197	66.3352	75.0864	79.786	82.8067	87.1467	91.417	95.6133	99.7306	103.763	107.703	111.543	115.273	118.882	122.355	126.504	130.85	142.81	148.538	159.663	165.886	184.869	203.066
	4	Pacific Dev.	0	0	0	0	0	0.0167845	0.0240903	0.0343785	0.0486707	0.0712577	0.0965178	0.150462	0.202567	0.304513	0.402286	0.582433	0.753769	1.09274	1.29693	1.46391	1.33545	1.33512	1.41245	1.55256	1.84619	2.57292	3.47089	4.88587	5.09393	5.03533	4.97556	4.91454	4.85215	4.76269	4.67246	4.58135	7.23523	9.88973	11.8437	13.4573	14.6982	15.7288	17.7127	24.0163	35.3879	48.8777	72.8575
	5	China	0	0	0	0	5.48915	12.7582	20.1932	32.1989	51.6986	55.2532	93.4597	45.703	42.4896	32.5605	38.0156	43.1043	51.2508	48.2938	45.2312	50.8136	51.3961	90.1118	108.117	100.577	80.0403	91.648	96.4145	98.4741	101.89	111.385	116.784	126.609	146.66	158.039	171.75	202.521	216.305	214.544	242.508	250.023	270.905	285.478	297.984	297.202	261.026	261.318	271.219
	6	Latin America	0	0	0	0	0	4.02497e-10	7.64762e-10	1.43956e-09	2.67338e-09	4.85977e-09	8.49751e-09	1.6709e-08	3.28256e-08	6.44222e-08	1.26289e-07	2.4725e-07	4.83367e-07	9.43389e-07	1.83766e-06	3.57152e-06	6.92263e-06	1.33744e-05	2.57357e-05	4.92717e-05	0	0.0599123	16.0086	29.0302	30.4623	31.8995	33.3465	34.8081	36.2899	37.7979	39.3388	40.9235	42.5565	44.4219	46.9719	51.5158	57.527	62.6801	69.1335	78.4468	84.9187	93.9773	118.409
	7	N.Africa_M.East	0	0	0	0.378155	0.9009	2.2392	4.28496	6.60507	10.3998	15.8142	26.0888	28.2745	30.9858	33.2772	32.5534	34.0264	39.0837	38.4587	38.1711	40.6643	39.3338	36.7884	36.9238	35.0154	33.3598	35.6594	44.3623	40.9826	42.028	43.3372	44.774	46.369	48.1606	50.1969	52.5381	55.2597	58.4565	62.2472	66.8075	72.5642	82.5994	94.1994	108.002	112.695	117.495	125.226	133.381
	8	Tropical Africa	0	0	0	0	0	3.86506	6.94191	11.1667	17.2446	27.2541	51.9243	84.6608	90.0132	96.1661	103.295	111.622	121.433	133.107	147.157	158.059	168.483	180.104	191.174	206.692	222.451	230.357	248.194	301.783	294.966	299.486	304.238	309.151	314.372	319.989	326.157	333.171	341.605	352.595	368.409	376.218	388.118	393.876	401.006	408.89	416.978	432.519	442.886
	9	South Asia	0	0	0	0	0.000366616	0.00173357	0.00654898	0.107016	0.248048	0.558562	1.36848	2.82965	3.46058	4.52084	6.51155	10.3663	10.5063	10.4717	10.4295	10.4904	10.5388	11.0251	11.5047	9.2367	9.82651	10.3156	12.3515	13.2138	13.4829	13.7574	14.0358	14.318	14.6042	14.8942	15.1882	15.4861	15.788	16.0939	16.4038	16.654	17.2234	17.7832	18.7715	19.6965	20.6651	21.699	23.3505
	10	SE Asia	0	0	0	0	0	0.105979	0.164375	0.214998	0.483506	0.791056	1.13827	1.20836	1.27683	1.34386	1.40976	1.47491	1.53988	1.60548	1.67285	1.73034	1.78384	1.98516	2.17241	2.29729	2.68759	3.04796	3.32362	3.35554	3.36543	3.37588	3.38531	3.39367	3.40092	3.48749	3.56968	3.64753	3.72104	3.79022	3.93082	4.06924	4.25554	4.45241	4.65029	5.50824	6.25244	7.09973	7.90797
			0	0	0	0.378155	6.43516	19.6113	32.8411	52.8899	85.9586	112.083	204.17	207.917	215.812	216.154	230.855	248.838	271.308	289.529	314.365	349.543	368.292	449.747	500.774	512.011	486.367	518	581.907	663.591	665.774	684.76	699.444	718.279	747.251	772.56	800.884	847.556	881.889	903.538	961.944	997.243	1057.08	1112.32	1162.65	1205.5	1210.65	1281.2	1381.27
HYDE 3.1 Baseline scenario
		1700 estimate (Mha)	HYDE	HOUGHTON
		North America	0	4	-4
		Europe	92.0791	75	17.0791
		USSR	79.786	53	26.786
		Pacific Dev.	4.88587	24	-19.1141
		China	98.4741	83	15.4741
		Latin America	29.0302	37	-7.96984
		N.Africa_M.East	40.9826	54	-13.0174
		Tropical Africa	301.783	187	114.783
		South Asia	13.2138	7	6.2138
		SE Asia	3.35554	2	1.35554
					0
		total	663.591	526	137.591
						Cereals cultivated in South/Central Asia 8,500 B.C.
						Rice, Millet culitvated in N. China around 7,000 B.C.
						Maize in Central/South America around 4,000 B.C.
HYDE 3.1 Baseline scenario
Total grazing land estimate, in Mkm2			-10000	-9000	-8000	-7000	-6000	-5000	-4000	-3000	-2000	-1000	0	100	200	300	400	500	600	700	800	900	1000	1100	1200	1300	1400	1500	1600	1700	1710	1720	1730	1740	1750	1760	1770	1780	1790	1800	1810	1820	1830	1840	1850	1860	1870	1880	1890
	1	Canada	0	0	0	0	0	0	0	0	0	0	0	0	0	0	0	0	0	0	0	0	0	0	0	0	0	0	0	0	0	0	0	0	0	0	0.000409169	0.000613753	0.00092063	0.00138095	0.00225502	0.00338253	0.0050738	0.0076107	0.0114161	0.0171241	0.0257471	0.031372	0.0401263
	2	USA	0	0	0	0	0	0	0	0	0	0	0	0	0	0	0	0	0	0	0	0	0	0	0	0	0	0	0	0	0	0	0	0	0	0	0	0	0	0	0	0	0	0	0	0	0	0	0
	3	Mexico	0	0	0	0	0	0	0	0	0	0	0	0	0	0	0	0	0	0	0	0	0	0	0	0	0	0	0.0590348	0.11807	0.125469	0.132532	0.139271	0.145694	0.151811	0.157633	0.163168	0.168425	0.173414	0.178142	0.182618	0.18685	0.190846	0.194613	0.198159	0.201492	0.204617	0.207542	0.249477
	4	Rest Central America	0	0	0	0	0	4.02497e-12	7.64762e-12	1.43956e-11	2.67338e-11	4.85977e-11	8.49751e-11	1.6709e-10	3.28256e-10	6.44222e-10	1.26289e-09	2.4725e-09	4.83367e-09	9.43389e-09	1.83766e-08	3.57152e-08	6.92263e-08	1.33744e-07	2.57357e-07	4.92717e-07	0	0.000599123	0.00647788	0.00565303	0.00599938	0.00638122	0.00680395	0.00727404	0.00779927	0.00838913	0.00905518	0.00984486	0.0107345	0.0117417	0.0130078	0.0143977	0.0178287	0.0207695	0.0242512	0.0252622	0.0264178	0.0278957	0.0294577
	5	Brazil	0	0	0	0	0	0	0	0	0	0	0	0	0	0	0	0	0	0	0	0	0	0	0	0	0	0	0.00275905	0.0055181	0.00603273	0.00660342	0.00723804	0.00794593	0.00873826	0.00962842	0.0106326	0.0117706	0.0130665	0.0162975	0.0199344	0.0241158	0.0285021	0.0363985	0.0466483	0.0600221	0.0775871	0.100862	0.132048
	6	Rest South America	0	0	0	0	0	0	0	0	0	0	0	0	0	0	0	0	0	0	0	0	0	0	0	0	0	0	0.0918141	0.161061	0.167122	0.173478	0.180152	0.187168	0.194551	0.202329	0.210533	0.219194	0.22835	0.238038	0.254159	0.289794	0.338094	0.375019	0.422276	0.497692	0.540565	0.603473	0.773112
	7	Northern Africa	0	0	0	0	0	0.004613	0.0122706	0.021545	0.0382099	0.0685629	0.113943	0.118097	0.122362	0.118758	0.115225	0.116339	0.117564	0.11941	0.1229	0.131412	0.13997	0.126785	0.114539	0.116972	0.111527	0.115458	0.154741	0.128476	0.130031	0.134285	0.138553	0.142837	0.147139	0.151463	0.155811	0.160188	0.164598	0.16905	0.17355	0.180694	0.204868	0.229144	0.253542	0.277668	0.30189	0.32621	0.352606
	8	Western Africa	0	0	0	0	0	0.010997	0.0291823	0.0512785	0.0784845	0.120688	0.154944	0.179803	0.209269	0.244321	0.286164	0.336284	0.396507	0.469074	0.556713	0.611113	0.6645	0.719161	0.772364	0.84137	0.919673	0.984546	1.09211	1.1932	1.20216	1.20311	1.20441	1.20623	1.20893	1.21318	1.22034	1.23314	1.25704	1.30309	1.39361	1.39988	1.40704	1.41529	1.42489	1.43619	1.45005	1.46693	1.48797
	9	Eastern Africa	0	0	0	0	0	0.0252847	0.0369443	0.0557905	0.087462	0.142602	0.350668	0.650868	0.6722	0.695444	0.721035	0.749564	0.781872	0.819229	0.863662	0.907813	0.947011	0.978052	1.00376	1.05637	1.09837	1.13546	1.16485	1.16938	1.1739	1.17505	1.17621	1.17739	1.1786	1.17987	1.1812	1.18264	1.1842	1.18594	1.1879	1.19014	1.22789	1.26299	1.29738	1.33173	1.36825	1.40549	1.44397
	10	Southern Africa	0	0	0	0	0	0.00236893	0.00329257	0.00459837	0.00649967	0.00925049	0.0136312	0.0159368	0.0186624	0.0218962	0.0257504	0.0303711	0.0359535	0.0427672	0.0511978	0.0616641	0.0733222	0.103825	0.135616	0.169182	0.206461	0.18357	0.224977	0.655247	0.573601	0.616705	0.661769	0.707891	0.756196	0.806846	0.860023	0.915933	0.974809	1.03692	1.10258	1.17216	1.24625	1.26048	1.28779	1.32098	1.35148	1.45276	1.49692
	11	Western Europe	0	0	0	0	0	0.00310148	0.00592442	0.0113498	0.0256253	0.0529286	0.143559	0.148671	0.15239	0.140361	0.128806	0.109499	0.0900502	0.144853	0.230599	0.339832	0.400866	0.60549	0.695765	0.778354	0.583565	0.598239	0.637813	0.733435	0.727311	0.705793	0.679955	0.649544	0.614564	0.614761	0.613367	0.613276	0.613685	0.609824	0.618833	0.646387	0.677914	0.706846	0.706596	0.710409	0.716052	0.731029	0.735026
	12	Central Europe	0	0	0	0	0	0.00135026	0.00227928	0.00495205	0.0104354	0.0188569	0.0371229	0.0411394	0.0418708	0.0410936	0.0403855	0.0377497	0.0352529	0.0569706	0.0880885	0.128117	0.149418	0.206781	0.238288	0.203086	0.191797	0.181797	0.189139	0.187356	0.189471	0.187574	0.184914	0.181475	0.177235	0.18154	0.185899	0.190334	0.194872	0.199537	0.206056	0.212601	0.226027	0.238661	0.25046	0.266279	0.278555	0.29373	0.306732
	13	Turkey	0	0	0	0	0.000943309	0.00293873	0.00486513	0.00671876	0.0131825	0.019376	0.0252814	0.0273268	0.0293624	0.0272032	0.0250532	0.0229125	0.0207812	0.022806	0.0248207	0.0273413	0.0298493	0.0217684	0.0256081	0.0294287	0.0236482	0.0254199	0.0324564	0.0343983	0.0347914	0.0352867	0.035789	0.0362985	0.0368153	0.0373393	0.0378709	0.03841	0.0389568	0.0395113	0.0400737	0.0406442	0.0421692	0.0436122	0.0451045	0.046648	0.0482442	0.0492893	0.0502823
	14	Ukraine +	0	0	0	0	0	0.000119493	0.000154617	0.000221912	0.000474765	0.00090032	0.00191427	0.00399907	0.00425399	0.00450787	0.00475986	0.00488881	0.00501883	0.00526303	0.00549915	0.00572436	0.0059161	0.00856975	0.012363	0.0118289	0.0112416	0.014114	0.0163934	0.0198901	0.0219581	0.023108	0.0243117	0.0255708	0.0268863	0.0282594	0.0296906	0.0311803	0.0327283	0.0343338	0.0359951	0.0380466	0.040238	0.042869	0.044575	0.0487683	0.0528039	0.0588131	0.0654137
	15	Asia-Stan	0	0	0	0	0.000447482	0.0011561	0.00269756	0.0062943	0.0146867	0.0342689	0.0799609	0.171345	0.182227	0.193725	0.205862	0.218658	0.232127	0.246282	0.261128	0.266316	0.271042	0.279504	0.288101	0.309223	0.33264	0.357787	0.400145	0.436354	0.443713	0.449811	0.456255	0.463052	0.470209	0.477733	0.485629	0.4939	0.502547	0.511569	0.520963	0.530719	0.540825	0.551262	0.562003	0.573012	0.584238	0.66173	0.727353
	16	Russia +	0	0	0	0	0	0.00051613	0.00120432	0.00281014	0.00713064	0.016448	0.0383825	0.0857517	0.0930915	0.100126	0.10686	0.105823	0.104956	0.111627	0.118743	0.123227	0.126968	0.183631	0.260187	0.263912	0.242315	0.291452	0.334326	0.341617	0.362396	0.398548	0.433604	0.467511	0.50021	0.531635	0.561711	0.590352	0.617458	0.642916	0.666592	0.696271	0.727441	0.833965	0.8788	0.97485	1.02182	1.12814	1.23789
	17	Middle East	0	0	0	0.00378155	0.00806569	0.0148403	0.0257139	0.037787	0.0526057	0.0702033	0.121664	0.137321	0.158134	0.186811	0.185256	0.201013	0.252492	0.242371	0.23399	0.24789	0.223519	0.219331	0.22909	0.203753	0.198422	0.215717	0.256425	0.246952	0.255458	0.263801	0.273398	0.284555	0.297652	0.313167	0.331699	0.353999	0.38101	0.413911	0.454452	0.504303	0.578956	0.669238	0.781378	0.802635	0.824819	0.876762	0.93092
	18	India +	0	0	0	0	3.66616e-06	1.73357e-05	6.54898e-05	0.00107016	0.00248048	0.00558562	0.0136848	0.0282965	0.0346058	0.0452084	0.0651155	0.103663	0.105063	0.104717	0.104295	0.104904	0.105388	0.110251	0.115047	0.092367	0.0982651	0.103156	0.123515	0.132138	0.134829	0.137574	0.140358	0.14318	0.146042	0.148942	0.151882	0.154861	0.15788	0.160939	0.164038	0.16654	0.172234	0.177832	0.187715	0.196965	0.206651	0.21699	0.233505
	19	Korea	0	0	0	0	0	0.000274662	0.000326027	0.000383333	0.000444519	0.000504273	0.000549411	0.00071643	0.000934522	0.00121925	0.00159083	0.00207542	0.00270675	0.00352809	0.00459455	0.00501585	0.00539209	0.00623755	0.00798101	0.00571079	0.00630751	0.00675108	0.00777675	0.00872166	0.0094622	0.00993793	0.0104323	0.0109451	0.0114761	0.0120245	0.0125895	0.0131698	0.0137637	0.0143687	0.0149817	0.0155988	0.0154268	0.0150652	0.0146779	0.0143472	0.0139761	0.0135019	0.0129982
	20	China +	0	0	0	0	0.0548915	0.127307	0.201606	0.321605	0.516542	0.552027	0.934048	0.456313	0.423961	0.324386	0.378565	0.428967	0.509801	0.47941	0.447717	0.50312	0.508568	0.89488	1.07318	1.00006	0.794096	0.909729	0.956368	0.97602	1.00944	1.10392	1.15741	1.25515	1.45512	1.56836	1.70491	2.01204	2.14929	2.13107	2.41009	2.48463	2.69362	2.83971	2.96516	2.95767	2.59629	2.59968	2.6992
	21	Southeastern Asia	0	0	0	0	0	0.00053331	0.00092641	0.00117553	0.00161603	0.00234643	0.00339349	0.00362602	0.00386135	0.00410128	0.00434845	0.00460675	0.00488182	0.00518185	0.00551861	0.00577596	0.00601362	0.00713428	0.00816138	0.00861366	0.00946753	0.0101688	0.0116194	0.0101741	0.0104906	0.0108139	0.0111281	0.0114328	0.0117275	0.0120116	0.0122848	0.0125462	0.0127951	0.0130307	0.0136454	0.0142811	0.0154372	0.0167399	0.0180923	0.0199775	0.0210049	0.023333	0.0255335
	22	Indonesia +	0	0	0	0	0	0.000526485	0.000717344	0.000974451	0.00321903	0.00556413	0.00798917	0.00845762	0.00890691	0.00933734	0.0097491	0.0101423	0.010517	0.0108729	0.0112099	0.0115274	0.0118247	0.0127173	0.0135627	0.0143592	0.0174084	0.0203109	0.0216168	0.0233813	0.0231638	0.022945	0.022725	0.0225039	0.0222817	0.0228632	0.0234121	0.0239291	0.0244153	0.0248715	0.0256628	0.0264113	0.0271181	0.0277842	0.0284106	0.0351048	0.0415196	0.0476643	0.0535462
	23	Japan	0	0	0	0	0	0.000164916	0.000234909	0.000331439	0.000461212	0.000627855	0.000820873	0.00134445	0.00184788	0.00284774	0.00380369	0.00558093	0.00726734	0.010627	0.0126355	0.0142679	0.0129417	0.0128917	0.0127704	0.0138973	0.0167614	0.0207618	0.0264446	0.0372661	0.0399509	0.0394113	0.0388565	0.0382854	0.0376968	0.0368333	0.0359579	0.0350693	0.0341657	0.0332454	0.0334682	0.0336167	0.0336838	0.0336612	0.0335386	0.0336829	0.0336729	0.0346979	0.0361391
	24	Oceania	0	0	0	0	0	2.92891e-06	5.99358e-06	1.23462e-05	2.54946e-05	8.47224e-05	0.000144305	0.000160169	0.000177796	0.000197387	0.000219169	0.000243396	0.000270355	0.000300376	0.000333833	0.000371159	0.000412858	0.000459522	0.00135402	0.00162834	0.00170048	0.00496741	0.00826423	0.0115926	0.0109884	0.0109419	0.0108991	0.01086	0.0108248	0.0107936	0.0107667	0.0107442	0.0381866	0.0656519	0.0849687	0.100956	0.113298	0.123626	0.143588	0.20648	0.320206	0.45408	0.692436
	25	Greenland	0	0	0	0	0	0	0	0	0	0	0	0	0	0	0	0	0	0	0	0	0	0	0	0	0	0	0	0	0	0	0	0	0	0	0	0	0	0	0	0	0	0	0	0	0	0	0
	26	Antarctica	0	0	0	0	0	0	0	0	0	0	0	0	0	0	0	0	0	0	0	0	0	0	0	0	0	0	0	0	0	0	0	0	0	0	0	0	0	0	0	0	0	0	0	0	0	0	0
		total	0	0	0	0.00378155	0.0643516	0.196113	0.328411	0.528899	0.859586	1.12083	2.0417	2.07917	2.15812	2.16154	2.30855	2.48838	2.71308	2.89529	3.14365	3.49543	3.68292	4.49747	5.00774	5.12011	4.86367	5.18	5.81907	6.63591	6.65774	6.8476	6.99444	7.18279	7.47251	7.7256	8.00884	8.47556	8.81889	9.03538	9.61944	9.97243	10.5708	11.1232	11.6265	12.055	12.1065	12.812	13.8127
	HYDE 3.1 Baseline scenario
	1	North America	0	0	0	0	0	0	0	0	0	0	0	0	0	0	0	0	0	0	0	0	0	0	0	0	0	0	0	0	0	0	0	0	0	0	0.000409169	0.000613753	0.00092063	0.00138095	0.00225502	0.00338253	0.0050738	0.0076107	0.0114161	0.0171241	0.0257471	0.031372	0.0401263
	2	Europe	0	0	0	0	0	0.00445173	0.0082037	0.0163018	0.0360606	0.0717855	0.180682	0.18981	0.194261	0.181455	0.169191	0.147249	0.125303	0.201823	0.318687	0.467948	0.550284	0.812271	0.934053	0.98144	0.775362	0.780035	0.826952	0.920791	0.916782	0.893367	0.864869	0.831019	0.791799	0.796301	0.799266	0.803611	0.808557	0.80936	0.824889	0.858988	0.903942	0.945507	0.957055	0.976689	0.994607	1.02476	1.04176
	3	USSR	0	0	0	0	0.000447482	0.00179172	0.00405649	0.00932635	0.0222921	0.0516173	0.120258	0.261095	0.279572	0.298359	0.317483	0.329369	0.342102	0.363172	0.38537	0.395268	0.403926	0.471705	0.560651	0.584964	0.586197	0.663352	0.750864	0.79786	0.828067	0.871467	0.91417	0.956133	0.997306	1.03763	1.07703	1.11543	1.15273	1.18882	1.22355	1.26504	1.3085	1.4281	1.48538	1.59663	1.65886	1.84869	2.03066
	4	Pacific Dev.	0	0	0	0	0	0.000167845	0.000240903	0.000343785	0.000486707	0.000712577	0.000965178	0.00150462	0.00202567	0.00304513	0.00402286	0.00582433	0.00753769	0.0109274	0.0129693	0.0146391	0.0133545	0.0133512	0.0141245	0.0155256	0.0184619	0.0257292	0.0347089	0.0488587	0.0509393	0.0503533	0.0497556	0.0491454	0.0485215	0.0476269	0.0467246	0.0458135	0.0723523	0.0988973	0.118437	0.134573	0.146982	0.157288	0.177127	0.240163	0.353879	0.488777	0.728575
	5	China	0	0	0	0	0.0548915	0.127582	0.201932	0.321989	0.516986	0.552532	0.934597	0.45703	0.424896	0.325605	0.380156	0.431043	0.512508	0.482938	0.452312	0.508136	0.513961	0.901118	1.08117	1.00577	0.800403	0.91648	0.964145	0.984741	1.0189	1.11385	1.16784	1.26609	1.4666	1.58039	1.7175	2.02521	2.16305	2.14544	2.42508	2.50023	2.70905	2.85478	2.97984	2.97202	2.61026	2.61318	2.71219
	6	Latin America	0	0	0	0	0	4.02497e-12	7.64762e-12	1.43956e-11	2.67338e-11	4.85977e-11	8.49751e-11	1.6709e-10	3.28256e-10	6.44222e-10	1.26289e-09	2.4725e-09	4.83367e-09	9.43389e-09	1.83766e-08	3.57152e-08	6.92263e-08	1.33744e-07	2.57357e-07	4.92717e-07	0	0.000599123	0.160086	0.290302	0.304623	0.318995	0.333465	0.348081	0.362899	0.377979	0.393388	0.409235	0.425565	0.444219	0.469719	0.515158	0.57527	0.626801	0.691335	0.784468	0.849187	0.939773	1.18409
	7	N.Africa_M.East	0	0	0	0.00378155	0.009009	0.022392	0.0428496	0.0660507	0.103998	0.158142	0.260888	0.282745	0.309858	0.332772	0.325534	0.340264	0.390837	0.384587	0.381711	0.406643	0.393338	0.367884	0.369238	0.350154	0.333598	0.356594	0.443623	0.409826	0.42028	0.433372	0.44774	0.46369	0.481606	0.501969	0.525381	0.552597	0.584565	0.622472	0.668075	0.725642	0.825994	0.941994	1.08002	1.12695	1.17495	1.25226	1.33381
	8	Tropical Africa	0	0	0	0	0	0.0386506	0.0694191	0.111667	0.172446	0.272541	0.519243	0.846608	0.900132	0.961661	1.03295	1.11622	1.21433	1.33107	1.47157	1.58059	1.68483	1.80104	1.91174	2.06692	2.22451	2.30357	2.48194	3.01783	2.94966	2.99486	3.04238	3.09151	3.14372	3.19989	3.26157	3.33171	3.41605	3.52595	3.68409	3.76218	3.88118	3.93876	4.01006	4.0889	4.16978	4.32519	4.42886
	9	South Asia	0	0	0	0	3.66616e-06	1.73357e-05	6.54898e-05	0.00107016	0.00248048	0.00558562	0.0136848	0.0282965	0.0346058	0.0452084	0.0651155	0.103663	0.105063	0.104717	0.104295	0.104904	0.105388	0.110251	0.115047	0.092367	0.0982651	0.103156	0.123515	0.132138	0.134829	0.137574	0.140358	0.14318	0.146042	0.148942	0.151882	0.154861	0.15788	0.160939	0.164038	0.16654	0.172234	0.177832	0.187715	0.196965	0.206651	0.21699	0.233505
	10	SE Asia	0	0	0	0	0	0.00105979	0.00164375	0.00214998	0.00483506	0.00791056	0.0113827	0.0120836	0.0127683	0.0134386	0.0140976	0.0147491	0.0153988	0.0160548	0.0167285	0.0173034	0.0178384	0.0198516	0.0217241	0.0229729	0.0268759	0.0304796	0.0332362	0.0335554	0.0336543	0.0337588	0.0338531	0.0339367	0.0340092	0.0348749	0.0356968	0.0364753	0.0372104	0.0379022	0.0393082	0.0406924	0.0425554	0.0445241	0.0465029	0.0550824	0.0625244	0.0709973	0.0790797
		total	0	0	0	0.00378155	0.0643516	0.196113	0.328411	0.528899	0.859586	1.12083	2.0417	2.07917	2.15812	2.16154	2.30855	2.48838	2.71308	2.89529	3.14365	3.49543	3.68292	4.49747	5.00774	5.12011	4.86367	5.18	5.81907	6.63591	6.65774	6.8476	6.99444	7.18279	7.47251	7.7256	8.00884	8.47556	8.81889	9.03538	9.61944	9.97243	10.5708	11.1232	11.6265	12.055	12.1065	12.812	13.8127
		global share											0.0140807	0.0143391	0.0148836	0.0149072	0.015921	0.0171612	0.0187109	0.0199675	0.0216803	0.0241064	0.0253995	0.031017	0.0345361	0.0353111	0.0335426	0.0357241	0.0401315	0.0457649	0.0459154	0.0472248	0.0482375	0.0495365	0.0515345	0.05328	0.0552334	0.0584521	0.0608199	0.062313	0.066341	0.0687754	0.072902	0.0767116	0.0801824	0.0831379	0.0834928	0.0883585	0.0952597
									4000 BC: see maps of Olofsson and Hickler (2007): Europe, Indochina
										3000 BC: see maps of Olofsson and Hickler (2007): Europe, Indochina, indonesia, S.western Africa, India
	HYDE 3.1 Baseline scenario		-10000	-9000	-8000	-7000	-6000	-5000	-4000	-3000	-2000	-1000	0	100	200	300	400	500	600	700	800	900	1000	1100	1200	1300	1400	1500	1600	1700	1710	1720	1730	1740	1750	1760	1770	1780	1790	1800	1810	1820	1830	1840	1850	1860	1870	1880	1890
		Americas	0	0	0	0	0	4.02497e-12	7.64762e-12	1.43956e-11	2.67338e-11	4.85977e-11	8.49751e-11	1.6709e-10	3.28256e-10	6.44222e-10	1.26289e-09	2.4725e-09	4.83367e-09	9.43389e-09	1.83766e-08	3.57152e-08	6.92263e-08	1.33744e-07	2.57357e-07	4.92717e-07	0	0.000599123	0.160086	0.290302	0.304623	0.318995	0.333465	0.348081	0.362899	0.377979	0.393798	0.409849	0.426486	0.4456	0.471974	0.51854	0.580344	0.634411	0.702751	0.801592	0.874934	0.971145	1.22422
		Europe incl. Turkey	0	0	0	0	0.000943309	0.00739047	0.0130688	0.0230206	0.0492432	0.0911614	0.205963	0.217137	0.223624	0.208658	0.194244	0.170161	0.146084	0.224629	0.343508	0.495289	0.580133	0.83404	0.959661	1.01087	0.799011	0.805455	0.859409	0.955189	0.951573	0.928653	0.900658	0.867318	0.828615	0.83364	0.837137	0.842021	0.847513	0.848872	0.864963	0.899632	0.946111	0.989119	1.00216	1.02334	1.04285	1.07405	1.09204
		former USSR	0	0	0	0	0.000447482	0.00179172	0.00405649	0.00932635	0.0222921	0.0516173	0.120258	0.261095	0.279572	0.298359	0.317483	0.329369	0.342102	0.363172	0.38537	0.395268	0.403926	0.471705	0.560651	0.584964	0.586197	0.663352	0.750864	0.79786	0.828067	0.871467	0.91417	0.956133	0.997306	1.03763	1.07703	1.11543	1.15273	1.18882	1.22355	1.26504	1.3085	1.4281	1.48538	1.59663	1.65886	1.84869	2.03066
		Asia+Pacific	0	0	0	0.00378155	0.0629608	0.143667	0.229596	0.36334	0.577394	0.636944	1.08229	0.636236	0.632429	0.574109	0.648648	0.756291	0.893	0.857008	0.820295	0.892872	0.87406	1.2639	1.46115	1.34039	1.14243	1.29156	1.41203	1.44625	1.49378	1.59934	1.66521	1.77691	1.99282	2.125	2.2835	2.61636	2.81151	2.85709	3.20131	3.34634	3.64978	3.90366	4.17256	4.26686	4.05814	4.26671	4.68427
		Africa	0	0	0	0	0	0.0432636	0.0816897	0.133212	0.210656	0.341104	0.633187	0.964705	1.02249	1.08042	1.14817	1.23256	1.3319	1.45048	1.59447	1.712	1.8248	1.92782	2.02628	2.18389	2.33604	2.41903	2.63668	3.14631	3.07969	3.12915	3.18094	3.23435	3.29086	3.35135	3.41738	3.4919	3.58065	3.695	3.85764	3.94288	4.08605	4.1679	4.2636	4.36657	4.47167	4.6514	4.78147
		World	0	0	0	0.00378155	0.0643516	0.196113	0.328411	0.528899	0.859586	1.12083	2.0417	2.07917	2.15812	2.16154	2.30855	2.48838	2.71308	2.89529	3.14365	3.49543	3.68292	4.49747	5.00774	5.12011	4.86367	5.18	5.81907	6.63591	6.65774	6.8476	6.99444	7.18279	7.47251	7.7256	8.00884	8.47556	8.81889	9.03538	9.61944	9.97243	10.5708	11.1232	11.6265	12.055	12.1065	12.812	13.8127
	HYDE 3.1 Baseline scenario		-10000	-9000	-8000	-7000	-6000	-5000	-4000	-3000	-2000	-1000	0	100	200	300	400	500	600	700	800	900	1000	1100	1200	1300	1400	1500	1600	1700	1710	1720	1730	1740	1750	1760	1770	1780	1790	1800	1810	1820	1830	1840	1850	1860	1870	1880	1890
		North America	0	0	0	0	0	0	0	0	0	0	0	0	0	0	0	0	0	0	0	0	0	0	0	0	0	0	0	0	0	0	0	0	0	0	0.000409169	0.000613753	0.00092063	0.00138095	0.00225502	0.00338253	0.0050738	0.0076107	0.0114161	0.0171241	0.0257471	0.031372	0.0401263
		Latin America	0	0	0	0	0	4.02497e-12	7.64762e-12	1.43956e-11	2.67338e-11	4.85977e-11	8.49751e-11	1.6709e-10	3.28256e-10	6.44222e-10	1.26289e-09	2.4725e-09	4.83367e-09	9.43389e-09	1.83766e-08	3.57152e-08	6.92263e-08	1.33744e-07	2.57357e-07	4.92717e-07	0	0.000599123	0.160086	0.290302	0.304623	0.318995	0.333465	0.348081	0.362899	0.377979	0.393388	0.409235	0.425565	0.444219	0.469719	0.515158	0.57527	0.626801	0.691335	0.784468	0.849187	0.939773	1.18409
		Europe	0	0	0	0	0.000943309	0.00739047	0.0130688	0.0230206	0.0492432	0.0911614	0.205963	0.217137	0.223624	0.208658	0.194244	0.170161	0.146084	0.224629	0.343508	0.495289	0.580133	0.83404	0.959661	1.01087	0.799011	0.805455	0.859409	0.955189	0.951573	0.928653	0.900658	0.867318	0.828615	0.83364	0.837137	0.842021	0.847513	0.848872	0.864963	0.899632	0.946111	0.989119	1.00216	1.02334	1.04285	1.07405	1.09204
		Africa	0	0	0	0	0	0.0432636	0.0816897	0.133212	0.210656	0.341104	0.633187	0.964705	1.02249	1.08042	1.14817	1.23256	1.3319	1.45048	1.59447	1.712	1.8248	1.92782	2.02628	2.18389	2.33604	2.41903	2.63668	3.14631	3.07969	3.12915	3.18094	3.23435	3.29086	3.35135	3.41738	3.4919	3.58065	3.695	3.85764	3.94288	4.08605	4.1679	4.2636	4.36657	4.47167	4.6514	4.78147
		CIS	0	0	0	0	0.000447482	0.00179172	0.00405649	0.00932635	0.0222921	0.0516173	0.120258	0.261095	0.279572	0.298359	0.317483	0.329369	0.342102	0.363172	0.38537	0.395268	0.403926	0.471705	0.560651	0.584964	0.586197	0.663352	0.750864	0.79786	0.828067	0.871467	0.91417	0.956133	0.997306	1.03763	1.07703	1.11543	1.15273	1.18882	1.22355	1.26504	1.3085	1.4281	1.48538	1.59663	1.65886	1.84869	2.03066
		Middle East	0	0	0	0.00378155	0.00806569	0.0148403	0.0257139	0.037787	0.0526057	0.0702033	0.121664	0.137321	0.158134	0.186811	0.185256	0.201013	0.252492	0.242371	0.23399	0.24789	0.223519	0.219331	0.22909	0.203753	0.198422	0.215717	0.256425	0.246952	0.255458	0.263801	0.273398	0.284555	0.297652	0.313167	0.331699	0.353999	0.38101	0.413911	0.454452	0.504303	0.578956	0.669238	0.781378	0.802635	0.824819	0.876762	0.93092
		Asia	0	0	0	0	0.0548951	0.128824	0.203876	0.32554	0.524763	0.566656	0.960485	0.498754	0.474117	0.3871	0.463173	0.555035	0.640237	0.614337	0.585971	0.644611	0.650129	1.04411	1.23071	1.13501	0.942306	1.07088	1.14734	1.1877	1.22734	1.3246	1.38091	1.4815	1.68435	1.80104	1.94103	2.25162	2.39231	2.37753	2.66189	2.74108	2.95752	3.1108	3.2476	3.25775	2.91311	2.93587	3.06092
		Oceania	0	0	0	0	0	2.92891e-06	5.99358e-06	1.23462e-05	2.54946e-05	8.47224e-05	0.000144305	0.000160169	0.000177796	0.000197387	0.000219169	0.000243396	0.000270355	0.000300376	0.000333833	0.000371159	0.000412858	0.000459522	0.00135402	0.00162834	0.00170048	0.00496741	0.00826423	0.0115926	0.0109884	0.0109419	0.0108991	0.01086	0.0108248	0.0107936	0.0107667	0.0107442	0.0381866	0.0656519	0.0849687	0.100956	0.113298	0.123626	0.143588	0.20648	0.320206	0.45408	0.692436
		World	0	0	0	0.00378155	0.0643516	0.196113	0.328411	0.528899	0.859586	1.12083	2.0417	2.07917	2.15812	2.16154	2.30855	2.48838	2.71308	2.89529	3.14365	3.49543	3.68292	4.49747	5.00774	5.12011	4.86367	5.18	5.81907	6.63591	6.65774	6.8476	6.99444	7.18279	7.47251	7.7256	8.00884	8.47556	8.81889	9.03538	9.61944	9.97243	10.5708	11.1232	11.6265	12.055	12.1065	12.812	13.8127
			-10000	-9000	-8000	-7000	-6000	-5000	-4000	-3000	-2000	-1000	0	100	200	300	400	500	600	700	800	900	1000	1100	1200	1300	1400	1500	1600	1700	1710	1720	1730	1740	1750	1760	1770	1780	1790	1800	1810	1820	1830	1840	1850	1860	1870	1880	1890
		Argentina	0	0	0	0	0	0	0	0	0	0	0	0	0	0	0	0	0	0	0	0	0	0	0	0	0	0	275.194	306.261	340.849	379.361	422.242	469.993	523.169	582.389	648.345	721.808	803.637	894.79	1384.92	1970.56	2804.01	3990.21	5678.55	8081.76	12002.9	17569	24280.4
		Australia	0	0	0	0	0	0	0	0	0	0	0	0	0	0	0	0	0	0	0	0	0	0	0	0	0	0	0	0	0	0	0	0	0	0	0	0	2746.01	5493.82	7426.26	8864.39	9912.06	10728.3	12472.8	18469.5	29506.1	42502.3	65434.8
		Brazil	0	0	0	0	0	0	0	0	0	0	0	0	0	0	0	0	0	0	0	0	0	0	0	0	0	0	275.905	551.81	603.273	660.342	723.804	794.593	873.826	962.842	1063.26	1177.06	1306.65	1629.75	1993.44	2411.58	2850.21	3639.85	4664.83	6002.21	7758.71	10086.2	13204.8
		China	0	0	0	0	5489.15	9148.58	15247.6	25412.7	42354.5	42354.5	75586.5	26803.1	22500.2	11414	15638.6	19417	26166	21715.4	17053	20648.8	19167.6	47239.5	53990.5	41892	37325.8	47809.5	51370.2	52091.4	54510.4	62606.5	66565.1	74907.9	93432.8	103241	115337	144445	156519	152999	179153	184809	203495	215278	224876	221054	181712	177919	177384
		Colombia	0	0	0	0	0	0	0	0	0	0	0	0	0	0	0	0	0	0	0	0	0	0	0	0	0	0	1883.6	3767.19	4050.75	4355.64	4683.48	5036.01	5415.06	5822.64	6260.91	6732.16	7238.88	7783.74	8369.62	8999.59	9676.98	10405.3	11188.5	12295.1	13511.1	14847.4	16315.8
		India	0	0	0	0	0	0	0	85.9503	171.901	343.801	687.602	1375.2	1440.69	1506.18	1571.66	1637.15	1702.63	1768.12	1833.61	1899.09	1964.58	2030.06	2095.55	2161.04	2226.52	2292.01	2357.49	2881.38	2945.41	3009.44	3073.47	3137.5	3201.53	3265.57	3329.6	3393.63	3457.66	3521.69	3585.72	3579.9	3771.99	3702.14	4051.4	4260.95	4470.51	4491.46	4883.09
		Indonesia	0	0	0	0	0	19.6372	24.7112	31.0963	229.57	430.707	634.533	676.524	716.624	754.892	791.383	826.154	859.256	890.743	920.665	949.07	976.008	1063.19	1146.58	1226.29	1532.86	1826.93	1964.45	2152.51	2132.51	2112.48	2092.41	2072.31	2052.2	2112.56	2169.76	2223.91	2275.1	2323.43	2405.43	2483.33	2557.24	2627.3	2693.63	3367.04	4013.01	4632.34	5225.85
		Mexico	0	0	0	0	0	0	0	0	0	0	0	0	0	0	0	0	0	0	0	0	0	0	0	0	0	0	5903.48	11807	12546.9	13253.2	13927.1	14569.4	15181.1	15763.3	16316.8	16842.5	17341.4	17814.2	18261.8	18685	19084.6	19461.3	19815.9	20149.2	20461.7	20754.2	24947.7
		South Africa	0	0	0	0	0	0	0.132792	0.368903	1.09346	3.57062	13.6909	16.4534	19.8368	23.9991	29.1449	35.5408	43.5375	53.6011	66.358	81.8339	100.781	137.6	184.286	244.26	322.5	426.446	602	4203.91	4452.56	4688.58	4911.97	5122.72	5320.83	5506.31	5679.16	5839.37	5986.95	6121.89	6244.2	6353.87	6450.91	6054.92	6851.28	8106.61	10301.2	19493.9	22832.4
		Russian Fed.	0	0	0	0	0	47.0458	109.775	256.148	597.703	1394.74	3254.77	7324.86	7993.66	8629.96	9234.6	9060.68	8902.81	9498.39	10138.9	10542.3	10880.9	15735.6	22654	22372.6	21185.9	25572.3	29475.1	30002.9	33550.5	36982.8	40294.6	43480.4	46534.1	49448.6	52216.4	54828.8	57276.1	59547.3	61629.5	64302.3	67116	77458.8	81629.3	90921.9	95312.4	105651	116357
		United States	0	0	0	0	0	0	0	0	0	0	0	0	0	0	0	0	0	0	0	0	0	0	0	0	0	0	0	0	0	0	0	0	0	0	0	0	0	0	0	0	0	0	0	0	0	0	0
Total grazing land estimate, in Mkm2			-10000	-9000	-8000	-7000	-6000	-5000	-4000	-3000	-2000	-1000	0	100	200	300	400	500	600	700	800	900	1000	1100	1200	1300	1400	1500	1600	1700	1710	1720	1730	1740	1750	1760	1770	1780	1790	1800	1810	1820	1830	1840	1850	1860	1870	1880	1890
		baseline	0	0	0	0.00378155	0.0643516	0.196113	0.328411	0.528899	0.859586	1.12083	2.0417	2.07917	2.15812	2.16154	2.30855	2.48838	2.71308	2.89529	3.14365	3.49543	3.68292	4.49747	5.00774	5.12011	4.86367	5.18	5.81907	6.63591	6.65774	6.8476	6.99444	7.18279	7.47251	7.7256	8.00884	8.47556	8.81889	9.03538	9.61944	9.97243	10.5708	11.1232	11.6265	12.055	12.1065	12.812	13.8127
		1st lower	0	0	0	0.000283616	0.00643516	0.0245141	0.0492616	0.0925574	0.171917	0.252186	0.510425	0.580946	0.666478	0.731111	0.848732	0.988034	1.15705	1.31991	1.52559	1.79912	2.00395	2.57943	3.01938	3.23772	3.21861	3.5803	4.19316	4.97694	5.05989	5.27267	5.45568	5.67442	5.97803	6.25776	6.56729	7.03475	7.40792	7.68013	8.27279	8.67609	9.30238	9.89974	10.4639	10.9702	11.1381	11.9153	12.984
		1st upper	0	0	0	0.00727948	0.122268	0.367712	0.60756	0.965241	1.54725	1.98947	3.57298	3.5774	3.64976	3.59198	3.76837	3.98873	4.26912	4.47067	4.7617	5.19175	5.36191	6.41552	6.99612	7.00251	6.50875	6.77971	7.445	8.2949	8.25561	8.42257	8.53324	8.6912	8.96704	9.1935	9.45048	9.91646	10.23	10.3908	10.9663	11.2689	11.8394	12.3469	12.7892	13.1401	13.0752	13.709	14.6416
		2nd lower	0	0	0	0	0	0	0	0	0	0	0	0	0	0	0	0	0	0	0	0.102807	0.324964	0.661393	1.03101	1.35533	1.57354	1.98059	2.56724	3.31796	3.46203	3.69772	3.9169	4.16603	4.48352	4.78989	5.12569	5.5939	5.99689	6.32482	6.92605	7.37966	8.03387	8.67617	9.30126	9.88523	10.1696	11.0185	12.1553
		2nd upper	0	0	0	0.0107774	0.180184	0.53931	0.886709	1.40158	2.23492	2.85811	5.10425	5.07563	5.1414	5.02241	5.22819	5.48908	5.82515	6.04605	6.37976	6.88806	7.04089	8.33356	8.98449	8.88491	8.15382	8.37942	9.07092	9.95388	9.85347	9.99753	10.072	10.1996	10.4615	10.6614	10.8921	11.3573	11.641	11.7461	12.313	12.5654	13.1079	13.5704	13.9519	14.2251	14.0437	14.6059	15.4704
Grazing land per capita (ha/cap)			-10000	-9000	-8000	-7000	-6000	-5000	-4000	-3000	-2000	-1000	0	100	200	300	400	500	600	700	800	900	1000	1100	1200	1300	1400	1500	1600	1700	1710	1720	1730	1740	1750	1760	1770	1780	1790	1800	1810	1820	1830	1840	1850	1860	1870	1880	1890
	1	Canada	0	0	0	0	0	0	0	0	0	0	#DIV/0!	0	0	0	0	0	0	0	0	0	0	0	0	0	0	0	0	0	0	0	0	0	0	0	2.31169e-05	3.44805e-05	5.14319e-05	7.67192e-05	0.000124587	0.000185854	0.000277257	0.000413625	0.000617084	0.00092065	0.00137685	0.00166872	0.00212309
	2	USA	0	0	0	0	0	0	0	0	0	0	0	0	0	0	0	0	0	0	0	0	0	0	0	0	0	0	0	0	0	0	0	0	0	0	0	0	0	0	0	0	0	0	0	0	0	0	0
	3	Mexico	0	0	0	0	0	0	0	0	0	0	0	0	0	0	0	0	0	0	0	0	0	0	0	0	0	0	7.57443	12.7112	9.1268	7.27956	6.14474	5.37138	4.8067	4.37352	4.02863	3.74596	3.50885	2.81983	2.23259	1.76227	1.37865	1.08002	0.832754	0.631763	0.525094	0.410274	0.395162
	4	Rest Central America	0	0	0	0	0	1.63778e-10	2.48948e-10	3.7489e-10	5.56959e-10	8.09969e-10	1.13301e-09	2.11197e-09	3.93319e-09	7.3175e-09	1.35984e-08	2.5238e-08	4.67723e-08	8.65363e-08	1.59796e-07	2.69549e-07	4.61508e-07	7.8673e-07	1.35451e-06	2.34627e-06	0	0.00239649	0.647788	0.141326	0.138372	0.136603	0.135888	0.136148	0.13735	0.139491	0.142606	0.147258	0.152889	0.159603	0.169098	0.179339	0.213163	0.238742	0.268407	0.269581	0.272163	0.277783	0.248605
	5	Brazil	0	0	0	0	0	0	0	0	0	0	0	0	0	0	0	0	0	0	0	0	0	0	0	0	0	0	0.148857	0.331443	0.347207	0.362345	0.376608	0.389729	0.401453	0.411519	0.419687	0.42366	0.426248	0.478733	0.521792	0.569838	0.583028	0.663338	0.751907	0.878283	1.02165	1.19288	1.40048
	6	Rest South America	0	0	0	0	0	0	0	0	0	0	0	0	0	0	0	0	0	0	0	0	0	0	0	0	0	0	10.3423	29.217	26.3535	23.6573	21.1341	18.7881	16.6215	14.6345	12.8251	11.189	9.71981	8.40935	7.01225	6.5104	5.98113	5.46524	5.22597	5.34602	5.1222	5.14018	5.30122
	7	Northern Africa	0	0	0	0	0	0.304873	0.685861	1.01583	1.51573	2.24767	3.05352	2.97274	2.89321	2.63756	2.40357	2.27903	2.16238	2.06168	1.99119	1.92622	1.87263	1.54577	1.28266	1.21053	1.07276	1.03734	2.81637	2.40072	2.38722	2.42225	2.45568	2.48758	2.51802	2.54706	2.5748	2.60132	2.62671	2.65108	2.6688	2.5881	2.48564	2.43205	2.31276	2.15392	2.10512	1.94705	1.69607
	8	Western Africa	0	0	0	0	0	2.18749	3.27892	2.53892	2.50723	2.616	1.88952	2.07181	2.284	2.77571	3.38738	4.21924	5.28716	5.87379	6.45089	6.38903	6.32855	7.57006	8.67816	8.67826	10.794	11.8615	9.92785	12.8292	12.8947	12.8063	12.7218	12.6431	12.5735	12.5197	12.4951	12.5264	12.6674	13.0253	13.1632	12.4874	11.1744	10.1264	9.27371	9.11474	8.30665	7.61465	6.52388
	9	Eastern Africa	0	0	0	0	0	4.87741	5.03471	5.34233	5.8523	6.62999	11.2632	17.726	15.4371	13.3892	11.5678	9.95858	8.54784	7.32257	6.27114	5.74876	5.29092	4.92783	4.58089	4.27516	3.94029	3.64575	3.2119	2.76232	2.76164	2.75755	2.75139	2.74318	2.73295	2.72072	2.70649	2.69026	2.67202	2.65174	2.62938	2.60367	2.65178	2.68886	2.71854	2.74132	2.75497	2.76003	2.75488
	10	Southern Africa	0	0	0	0	0	0.677336	0.631414	0.583337	0.538434	0.49448	0.46508	0.501248	0.537533	0.57334	0.608038	0.640997	0.671633	0.699458	0.724112	0.806155	0.891115	1.16481	1.41277	1.61788	1.82462	1.49759	1.6781	4.50131	3.8834	4.12473	4.37116	4.61598	4.86582	5.12066	5.38048	5.64518	5.91341	6.18658	6.46469	6.74725	6.59375	6.16279	5.84377	5.54925	5.30406	5.33434	5.15563
	11	Western Europe	0	0	0	0	0	4.20292	5.58495	7.29838	10.9958	14.7923	25.4575	22.6769	19.9119	15.6436	12.1901	8.7583	6.05767	8.15379	10.8053	13.1074	13.1326	15.2536	14.2341	13.401	8.56445	9.1105	8.48709	8.48648	9.62508	9.20193	8.73025	8.20938	7.64209	7.51726	7.37088	7.23776	7.10737	6.92474	6.88292	7.03377	7.20646	7.18894	6.76982	6.36334	5.99429	5.34299	4.94781
	12	Central Europe	0	0	0	0	0	0.299852	0.265976	0.299103	0.250535	0.216809	0.146648	0.156078	0.153202	0.159354	0.166546	0.182877	0.20878	0.306197	0.427189	0.55577	0.582421	0.663353	0.563434	0.329605	0.471163	0.340065	0.269408	0.23527	0.223309	0.212253	0.200882	0.189614	0.178366	0.176139	0.174108	0.171623	0.168807	0.166752	0.164705	0.158304	0.154777	0.151104	0.150291	0.151013	0.14926	0.146009	0.142503
	13	Turkey	0	0	0	0	0.537246	1.02071	1.01382	0.827033	0.815506	0.690547	0.498358	0.515924	0.531232	0.496067	0.460423	0.440625	0.41899	0.430634	0.440605	0.434443	0.429188	0.276843	0.229214	0.224938	0.207063	0.181319	0.186626	0.179482	0.170467	0.164408	0.158625	0.153089	0.147776	0.142654	0.137716	0.132945	0.128323	0.123838	0.119441	0.114971	0.109392	0.104122	0.099802	0.0938762	0.0888077	0.0813677	0.0751427
	14	Ukraine +	0	0	0	0	0	0.0188673	0.0144953	0.0147941	0.0158255	0.0200071	0.0319045	0.0615242	0.0607713	0.0693519	0.079331	0.0888874	0.100377	0.0956914	0.0916525	0.0864054	0.0816013	0.161693	0.197809	0.16429	0.193821	0.225824	0.204917	0.234001	0.255347	0.26488	0.274698	0.284796	0.29517	0.305812	0.31671	0.327849	0.33921	0.350766	0.362485	0.377672	0.384881	0.396378	0.398414	0.421365	0.441025	0.480676	0.52393
	15	Asia-Stan	0	0	0	0	0.185002	0.409684	0.819368	1.63874	3.27747	6.55494	13.1099	26.015	25.6669	25.3531	25.0667	25.1436	25.191	24.9021	24.6231	23.4382	22.3632	15.3743	10.5647	11.3393	12.198	9.84012	8.80406	7.20056	6.73107	6.42655	6.1386	5.86614	5.60819	5.36378	5.13204	4.91212	4.70322	4.50458	4.3155	4.09201	3.87424	3.63257	3.50101	3.172	2.90439	2.85237	2.71759
	16	Russia +	0	0	0	0	0	0.0842309	0.168464	0.336935	0.732824	1.4489	2.89808	6.04307	6.12296	6.14658	6.12268	5.65903	5.23848	5.20002	5.16276	5.17761	5.16128	7.08454	9.51671	8.8979	7.52533	8.32719	8.35814	7.60839	7.78834	8.30212	8.74702	9.12507	9.43842	9.68939	9.88035	10.0137	10.092	10.1175	10.0927	10.1354	10.1735	11.198	11.3218	12.0427	12.0964	12.1958	12.3827
	17	Middle East	0	0	0	0.757757	1.38533	2.18476	3.24473	4.08693	4.87671	5.57802	8.28503	8.38098	8.73591	9.4162	8.57427	9.17674	11.3349	9.97922	8.81651	8.73774	7.40128	4.84173	3.43464	2.8621	2.88908	2.44827	2.34178	1.98121	1.90822	1.77	1.66421	1.58437	1.52636	1.48769	1.46701	1.46395	1.47887	1.51292	1.56886	1.63006	1.74894	1.72096	1.85449	1.66687	1.58014	1.46623	1.36059
	18	India +	0	0	0	0	0.000495542	0.00142137	0.00312429	0.0341809	0.0540317	0.0865533	0.137156	0.248176	0.262138	0.292395	0.437891	0.710609	0.718676	0.732557	0.739562	0.718093	0.811474	0.854405	0.881877	0.807564	0.908039	0.898107	0.90824	1.03614	1.03737	1.04411	1.05062	1.0569	1.06293	1.0687	1.0742	1.07941	1.08433	1.08894	1.0903	1.08665	1.07694	1.06759	1.08295	1.09287	1.09869	1.04044	1.02087
	19	Korea	0	0	0	0	0	0.00784328	0.0049343	0.00310906	0.00192225	0.00115165	0.00065054	0.000804974	0.000998977	0.00124492	0.0015546	0.00194464	0.00243582	0.00304406	0.00380714	0.0039859	0.00411617	0.00459942	0.00569119	0.00398502	0.00422658	0.00437331	0.00471868	0.00433921	0.00460769	0.00473847	0.0048723	0.00500887	0.00514783	0.00528875	0.00543108	0.00557415	0.00571716	0.0058591	0.00599878	0.0062259	0.00586494	0.00577611	0.0051913	0.0048381	0.00449962	0.00430326	0.00382801
	20	China +	0	0	0	0	104.283	193.486	245.126	312.825	401.951	343.652	465.175	171.259	119.757	68.8755	60.3418	51.266	45.6239	32.0886	22.3858	22.3609	20.3427	29.8293	26.8296	33.3353	22.6884	22.7432	19.1274	15.6163	14.6937	15.0929	14.862	15.136	16.4781	16.677	17.0218	18.86	18.9135	17.6042	18.6881	18.0832	19.3392	20.3278	21.1631	20.9208	18.2017	18.1392	18.7118
	21	Southeastern Asia	0	0	0	0	0	0.0183749	0.019265	0.0147368	0.0122012	0.0175268	0.00581357	0.00699602	0.00885843	0.0183599	0.0142459	0.0122034	0.00963892	0.0122865	0.0165706	0.0143749	0.0160922	0.00780633	0.00780906	0.0106353	0.0131408	0.0110443	0.0117526	0.0100692	0.00991598	0.00891438	0.00863116	0.00788901	0.00650276	0.00603172	0.00552609	0.00451398	0.00424985	0.0044255	0.00396141	0.00401881	0.00394732	0.00404671	0.00418724	0.00470138	0.00581582	0.00638346	0.00677143
	22	Indonesia +	0	0	0	0	0	0.177662	0.168654	0.166457	0.407762	0.366035	0.305465	0.29711	0.288656	0.280074	0.271321	0.262332	0.253021	0.243271	0.232932	0.226035	0.219443	0.192979	0.173997	0.170922	0.1802	0.185944	0.168008	0.156224	0.149294	0.142585	0.136324	0.130467	0.124975	0.124186	0.123263	0.122223	0.121079	0.119843	0.117298	0.114744	0.108762	0.102776	0.0971616	0.107228	0.114593	0.115627	0.115786
	23	Japan	0	0	0	0	0	0.115266	0.118276	0.119258	0.0461116	0.0355327	0.0315663	0.0479464	0.0614113	0.0885656	0.111113	0.15363	0.189066	0.261969	0.29583	0.317935	0.274995	0.249435	0.226719	0.227849	0.222693	0.231806	0.270838	0.344286	0.365563	0.357211	0.34888	0.340557	0.332233	0.310804	0.291028	0.2727	0.255644	0.239708	0.229648	0.220029	0.210749	0.201714	0.192837	0.154531	0.128524	0.113383	0.103239
	24	Oceania	0	0	0	0	0	0.00741381	0.0101142	0.0138895	0.019121	0.0423612	0.0481017	0.0320337	0.0253994	0.0179443	0.0146113	0.0108176	0.00901185	0.00667502	0.00606968	0.00579936	0.00688097	0.00741165	0.0211566	0.022306	0.0182847	0.0403855	0.0486131	0.0434178	0.0378909	0.0377308	0.0375831	0.0374482	0.0373268	0.0374778	0.0376458	0.0378318	0.135413	0.234471	0.29503	0.341069	0.372691	0.396238	0.448713	0.622424	0.932269	1.23368	1.72776
	25	Greenland	0	0	0	0	0	0	0	0	0	0	0	0	0	0	0	0	0	0	0	0	0	0	0	0	0	0	0	0	0	0	0	0	0	0	0	0	0	0	0	0	0	0	0	0	0	0	0
	26	Antarctica	0	0	0	0	0	0	0	0	0	0	0	0	0	0	0	0	0	0	0	0	0	0	0	0	0	0	0	0	0	0	0	0	0	0	0	0	0	0	0	0	0	0	0	0	0	0	0
		total	0	0	0	0.0395381	0.488218	1.02977	1.14311	1.1905	1.18541	1.01564	0.879539	0.877606	0.896889	0.949872	0.955709	0.98257	0.999309	1.04071	1.10019	1.12395	1.13868	1.13013	1.12584	1.12173	1.099	1.02902	1.12785	1.1209	1.08521	1.06487	1.05167	1.03244	1.00161	0.990084	0.977578	0.950718	0.946185	0.957212	0.945704	0.946759	0.93108	0.930885	0.914636	0.907548	0.911885	0.911305	0.906639
Grazing land per capita (ha/cap)			-10000	-9000	-8000	-7000	-6000	-5000	-4000	-3000	-2000	-1000	0	100	200	300	400	500	600	700	800	900	1000	1100	1200	1300	1400	1500	1600	1700	1710	1720	1730	1740	1750	1760	1770	1780	1790	1800	1810	1820	1830	1840	1850	1860	1870	1880	1890
		baseline	0	0	0	0.0395381	0.488218	1.02977	1.14311	1.1905	1.18541	1.01564	0.879539	0.877606	0.896889	0.949872	0.955709	0.98257	0.999309	1.04071	1.10019	1.12395	1.13868	1.13013	1.12584	1.12173	1.099	1.02902	1.12785	1.1209	1.08521	1.06487	1.05167	1.03244	1.00161	0.990084	0.977578	0.950718	0.946185	0.957212	0.945704	0.946759	0.93108	0.930885	0.914636	0.907548	0.911885	0.911305	0.906639
		1st lower	0	0	0	0.00296536	0.0488218	0.128721	0.171466	0.208338	0.237083	0.228519	0.219885	0.245213	0.276981	0.32128	0.351364	0.390138	0.426176	0.47444	0.533918	0.578507	0.619577	0.648165	0.678816	0.709328	0.727281	0.711234	0.812714	0.840678	0.824758	0.819954	0.820306	0.815633	0.801295	0.801972	0.801618	0.789101	0.794801	0.813637	0.813312	0.823688	0.819358	0.828496	0.82318	0.82588	0.838947	0.847525	0.85225
		1st upper	0	0	0	0.0761109	0.927615	1.93081	2.11475	2.17267	2.13375	1.80276	1.53919	1.51	1.5168	1.57847	1.56006	1.575	1.57244	1.60697	1.66647	1.6694	1.65779	1.6121	1.57287	1.53413	1.47072	1.34681	1.44298	1.40113	1.34566	1.3098	1.28304	1.24926	1.20194	1.17821	1.15355	1.11235	1.09758	1.1008	1.07811	1.06985	1.04282	1.03329	1.00611	0.989241	0.984851	0.97511	0.961048
		2nd lower	0	0	0	0	0	0	0	0	0	0	0	0	0	0	0	0	0	0	0	0.0330575	0.100472	0.166196	0.231791	0.296928	0.35556	0.393449	0.49758	0.560452	0.564308	0.575032	0.588938	0.598819	0.600971	0.613855	0.625653	0.627478	0.64341	0.670054	0.680913	0.700608	0.707627	0.726097	0.731716	0.7442	0.765995	0.783733	0.797851
		2nd upper	0	0	0	0.112684	1.36701	2.83186	3.0864	3.15483	3.08208	2.58988	2.19885	2.14239	2.13671	2.20706	2.1644	2.16744	2.14558	2.17324	2.23275	2.21485	2.17689	2.09407	2.01989	1.94653	1.84244	1.66459	1.75812	1.68136	1.60611	1.55472	1.51441	1.46607	1.40227	1.36632	1.32951	1.27397	1.24897	1.24439	1.21051	1.19293	1.15455	1.13569	1.09757	1.07092	1.0578	1.0389	1.01545
[truncated: 123 more columns]

## Sheet: pivot
Sum of -10000
IM22	Total
1	0.624195
2	232.561
3	38.6738
4	38.0153
5	0
6	336.688
7	82.1818
8	239.422
9	290.157
10	65.0876
11	277.214
12	229.947
13	12.1064
14	2.19956
15	473.623
16	8.83189
17	103.819
18	93.2503
19	0.0380376
20	580.376
21	32.1626
22	2.84311
23	0.133287
24	0.626441
25	0.0117868
Grand Total	3140.59

## Sheet: Williams
Theory based on Michael Williams (History Today, 2001)
Neolithic agriculture
Typically village should have:
6 households					-0.5	+50%
30 persons					lower	upper
13 ha cropland (wheat)	=	0.433333	ha/cap		0.216667	0.65
40 pieces of cattle	=	1.33333	cattle/cap		0.666667	2
40 pieces of sheep/goats	=	1.33333	sheep/cap		0.666667	2
20 ha of woodland	=	0.666667	forest/cap		0.333333	1
Assumption: woodland used as pasture ?
Sheep and goats, cattle and pigs: 9000-7000 BC
Draught animals: from 4000 BC

## Sheet: 2grid
ISO1	y-10000	y-9000	y-8000	y-7000	y-6000	y-5000	y-4000	y-3000	y-2000	y-1000	y0	y100	y200	y300	y400	y500	y600	y700	y800	y900	y1000	y1100	y1200	y1300	y1400	y1500	y1600	y1700	y1710	y1720	y1730	y1740	y1750	y1760	y1770	y1780	y1790	y1800	y1810	y1820	y1830	y1840	y1850	y1860	y1870	y1880	y1890	y1900	y1910
4	0	0	0	0	0.0790221	0.21883	1.78712	6.27314	17.9441	46.6838	186.735	420.154	933.677	1867.35	3734.71	7469.41	7492.94	7290.83	7087.18	6957.64	6827.04	7228	7631.1	5357.55	5757.04	6158.67	7720.49	7742.52	7935.62	8118.28	8305.14	8496.29	8691.85	8891.9	9096.55	9305.92	9520.1	9739.2	9963.35	10192.7	10533.8	11122.1	11743.3	12399.1	13091.7	14028.5	15201.8	16473.2	17851
8	0	0	0	0	0	0	5.84274	11.6855	23.371	46.7419	78.4261	82.6364	87.0728	91.7473	96.6728	101.863	107.331	206.282	347.457	477.983	507.003	645.277	510.844	376.412	434.321	313.676	255.422	372.275	356.873	339.303	319.566	297.66	273.586	270.052	265.757	260.701	254.885	248.307	251.641	254.786	255.486	267.081	279.143	303.345	326.697	354.535	381.358	413.629	444.68
12	0	0	0	0	0	0	485.199	970.398	1940.8	3881.59	6699.74	6586.94	6475.84	6366.4	6258.62	6152.48	6047.96	5945.03	5843.69	6378.82	6916.98	6764.37	6610.6	5879.9	5144.69	5264.94	7920.17	6177.74	6455.8	6734.02	7012.4	7290.93	7569.62	7848.47	8127.47	8406.62	8685.93	8965.39	9245.01	9524.78	11180.2	12836.5	14493.8	16152	17811.1	19471.1	21132.1	22794	24456.8
16	0	0	0	0	0	0	0	0	0	0	0	0	0	0	0	0	0	0	0	0	0	0	0	0	0	0	0	0	0	0	0	0	0	0	0	0	0	0	0	0	0	0	0	0	0	0	0	0	0
20	0	0	0	0	0	0	0.126863	0.253727	0.507454	1.01491	2.14945	2.20044	2.25257	2.30586	2.36034	2.41604	2.47298	2.53119	2.59069	2.65153	2.71372	2.77729	2.84228	2.90872	2.97663	3.04606	3.11703	3.18957	3.35838	3.53613	3.72328	3.92033	4.12781	4.34627	4.5763	4.81849	5.0735	5.34201	5.62473	5.9224	6.23583	6.56585	6.91332	7.27919	7.66442	8.07003	8.4971	8.94678	9.42025
24	0	0	0	0	0	0	0	0	3.05759	6.11517	19.5396	28.1787	40.7678	59.1865	86.2526	126.217	185.539	274.111	407.218	593.496	824.617	1094.6	1436.07	1873.69	2565.48	3489.29	4485.92	23218.3	11904.7	12960.1	14051.1	15181.2	16354.2	17574.9	18848.6	20181.7	21581.6	23057.7	24620.8	26284.9	28067.1	27784.9	27535.1	27327.8	27177.4	27104.8	27142.5	27343.1	27798.7
28	0	0	0	0	0	0	0	0	0	0	0	0	0	0	0	0	0	0	0	0	0	0	0	0	0	0	1.2008	1.17963	1.29361	1.41788	1.55322	1.70046	1.86045	2.03402	2.22202	2.42527	2.64454	2.88049	3.13365	3.40432	3.69248	3.99768	4.05093	3.78885	3.5322	3.35661	3.37865	3.18461	2.96749
31	0	0	0	0	0	0	0	0	55.4262	110.852	258.656	554.262	583.026	612.624	642.947	673.848	705.132	736.54	767.734	787.435	802.916	1161.12	1485.83	1772.23	1342.5	1572.07	1739.25	1821.98	1171.77	1252.41	1337.85	1428.23	1523.68	1624.31	1730.18	1841.28	1957.55	2078.81	2204.79	2335.04	2468.9	2605.45	2743.4	2880.99	3015.81	3144.52	3262.48	3363.11	3436.74
32	0	0	0	0	0	0	0	0	0	0	0	0	0	0	0	0	0	0	0	0	0	0	0	0	0	0	275.194	306.261	340.849	379.361	422.242	469.993	523.169	582.389	648.345	721.808	803.637	894.79	1384.92	1970.56	2804.01	3990.21	5678.55	8081.76	12002.9	17569	24280.4	39659.6	54020
36	0	0	0	0	0	0	0	0	0	0	0	0	0	0	0	0	0	0	0	0	0	0	0	0	0	0	0	0	0	0	0	0	0	0	0	0	2746.01	5493.82	7426.26	8864.39	9912.06	10728.3	12472.8	18469.5	29506.1	42502.3	65434.8	94092.7	128147
40	0	0	0	0	0	0	4.23819	8.47637	16.9527	33.9055	169.527	186.48	203.433	186.48	169.527	152.575	135.622	152.575	169.527	203.433	237.338	305.149	423.819	678.11	423.819	678.11	712.015	1467.18	1520.39	1575.54	1632.68	1691.9	1753.26	1816.85	1882.75	1951.03	2021.79	2095.12	2171.11	2249.86	2331.46	2416.02	2503.65	2511.18	2518.74	2526.32	2533.92	2541.54	2549.19
44	0	0	0	0	0	0	0	0	0	0	0	0	0	0	0	0	0	0	0	0	0	0	0	0	0	0	0.516852	0.845757	0.95963	1.0877	1.23166	1.3934	1.575	1.77883	2.00748	2.26387	2.55123	2.87318	3.23374	3.42303	3.62135	3.46512	3.29446	3.10858	3.21471	3.28773	3.31601	3.28526	3.17806
48	0	0	0	0	0	0	0	0	0.466445	0.93289	1.21978	1.33188	1.45288	1.58317	1.72306	1.87274	2.03224	2.20135	2.37954	2.56577	2.75838	2.95471	3.15074	3.34036	3.51422	3.65763	3.74638	3.73687	3.87306	4.01211	4.15378	4.29777	4.44373	4.59123	4.73973	4.88859	5.03702	5.18408	5.32861	5.4759	5.61789	5.75244	5.87692	5.98797	6.08917	6.16739	6.21519	6.22238	6.17439
50	0	0	0	0	0	0	0.178184	0.593948	3.29971	6.59942	21.9981	47.2311	50.4661	54.3482	58.2302	62.1122	65.9942	73.1112	80.2282	89.9333	99.6383	103.52	107.402	107.402	121.636	129.4	168.22	207.041	212.546	216.883	221.31	225.826	230.435	235.138	239.936	244.833	249.83	254.928	260.131	269.101	278.38	287.979	277.975	292.605	308.005	324.216	341.28	359.242	378.15
51	0	0	0	0	0	0	0	0	1.91408	3.82816	8.93237	19.1408	20.441	21.8288	23.3101	24.8911	26.5783	28.379	30.3005	31.9362	33.5589	50.1579	66.6351	83.1797	66.1454	82.5616	98.4724	116.025	122.084	128.46	135.169	142.228	149.655	157.471	165.694	174.347	183.452	193.032	203.112	213.719	224.879	236.622	248.978	261.979	275.659	290.053	305.199	321.135	337.903
52	0	0	0	0	0	0	0	0	0	0	0	0	0	0	0	0	0	0	0	0	0	0	0	0	0	0	0.295998	1.16078	1.13802	1.1157	1.09383	1.07238	1.05135	1.03074	1.01053	0.990711	0.971285	0.952241	1.0736	1.18984	1.30111	1.40756	1.50933	1.56429	1.61652	1.66609	1.7131	1.75763	1.78061
56	0	0	0	0	0	0	8.44831	16.8966	33.7933	67.5865	204.179	204.025	203.871	203.717	203.563	195.734	112.923	289.084	521.185	836.47	1014.01	1935.83	2298.8	2352.57	1737.28	1960.48	1915.67	2171.61	2195.36	2187.65	2148.46	2077.8	1975.67	2011.18	2035.65	2049.07	2051.45	2042.78	2020.97	1987.91	2020.07	1898.25	1884.66	1860.66	1809.35	1811.82	1786.21	1743.02	1681.31
60	0	0	0	0	0	0	0	0	0	0	0	0	0	0	0	0	0	0	0	0	0	0	0	0	0	0	0.127346	0.208384	0.239255	0.274415	0.314433	0.359957	0.411716	0.470533	0.537337	0.613177	0.699237	0.796851	0.907525	1.03296	1.17505	1.2253	1.2722	1.3144	1.35027	1.37789	1.39497	1.39884	1.38634
64	0	0	0	0	0	0	0	0.0793746	0.158749	0.317499	0.409425	0.615958	0.926651	1.39402	2.09707	3.15461	4.74535	7.13805	10.7369	10.7667	10.7962	10.8256	10.8548	11.9723	13.0954	16.4124	21.9404	27.4966	30.0409	30.6051	31.1799	31.7655	32.362	32.9698	33.589	34.2198	34.8624	35.5171	36.1841	39.3406	42.7725	46.5037	50.5604	54.971	61.0945	67.9	75.4637	83.8699	93.2124
68	0	0	0	0	0	0	0	0	0	0	0	0	0	0	0	0	0	0	0	0	0	0	0	0	0	0	3388.6	6777.2	6908.26	7041.85	7178.02	7316.82	7458.3	7602.52	7749.53	7899.37	8052.11	8207.81	8366.51	9936.07	11800.1	11953.5	12106.9	14458.9	12435.2	10410.4	16985.9	14853.7	17115.7
70	0	0	0	0	0	0	0	19.4751	38.9502	77.9004	124.124	125.992	128.002	130.043	132.118	134.225	136.366	138.541	140.75	142.995	145.276	153.626	161.982	170.342	178.708	187.08	228.725	228.798	242.502	252.408	262.719	273.451	284.621	296.247	308.349	320.945	334.055	347.701	361.904	383.85	407.127	431.814	458	485.772	538.305	596.519	661.029	732.514	811.731
72	0	0	0	0	0	0	0	0	0.0551451	0.11029	0.22058	0.441161	0.882322	1.76464	3.52929	7.05857	14.1171	28.2343	56.4686	112.937	225.874	276.031	340.345	423.958	534.418	683.113	887.794	4661.24	5133.34	5590.77	6064.09	6554.81	7064.73	7595.91	8150.77	8732.17	9343.51	9988.91	10673.4	11403.1	12185.9	12073.7	11976.4	11898.5	11846.7	11830.5	11864.7	11973.5	12199.1
76	0	0	0	0	0	0	0	0	0	0	0	0	0	0	0	0	0	0	0	0	0	0	0	0	0	0	275.905	551.81	603.273	660.342	723.804	794.593	873.826	962.842	1063.26	1177.06	1306.65	1629.75	1993.44	2411.58	2850.21	3639.85	4664.83	6002.21	7758.71	10086.2	13204.8	17449	23346.6
84	0	0	0	0	0	0	0	0	0	0	0	0	0	0	0	0	0	0	0	0	0	0	0	0	0	0	5.11099	5.4663	5.79839	6.15066	6.52432	6.92069	7.34113	7.78712	8.26021	8.76204	9.29435	9.859	10.458	10.5947	10.7332	10.8735	11.0156	11.1596	12.3084	13.5754	14.9729	16.5142	18.2142
86	0	0	0	0	0	0	0	0	0	0	0	0	0	0	0	0	0	0	0	0	0	0	0	0	0	0	0	0	0	0	0	0	0	0	0	0	0	0	0	0	0	0	0	0	0	0	0	0	0
90	0	0	0	0	0	0	0	0	0.000166806	0.000333611	0.000364395	0.00053735	0.000791666	0.00116515	0.00171286	0.00251479	0.00368671	0.00539561	0.00788116	0.0114852	0.0166916	0.0241777	0.0348782	0.0500543	0.0713486	0.100767	0.14043	0.191642	0.236905	0.292745	0.3616	0.446452	0.550953	0.679566	0.837735	1.0321	1.27071	1.56336	1.92188	1.99335	2.06546	2.13785	2.21006	2.28153	2.30462	2.32367	2.33787	2.3462	2.34742
92	0	0	0	0	0	0	0	0	0	0	0	0	0	0	0	0	0	0	0	0	0	0	0	0	0	0	0.947033	1.85693	1.96974	2.08941	2.21634	2.35099	2.49382	2.64532	2.80603	2.9765	3.15733	3.34915	3.55262	3.59906	3.6461	3.69376	3.74205	3.79096	3.84479	3.89938	3.95475	4.0109	4.06785
96	0	0	0	0	0	0	0	0	0.00393443	0.00786885	0.00859494	0.0126744	0.0186729	0.0274823	0.0404012	0.059316	0.0869579	0.127266	0.185892	0.1806	0.174979	0.202765	0.325005	0.342041	0.354584	0.278215	0.323102	0.352745	0.361991	0.390384	0.420832	0.453455	0.488374	0.525712	0.56559	0.608126	0.653429	0.701601	0.752725	0.778554	0.804484	0.830372	0.85604	0.881275	0.878083	0.873297	0.907218	0.936246	0.959805
100	0	0	0	0	0	0	0	46.0817	92.1634	184.327	340.201	425.251	503.255	438.534	378.046	321.563	268.865	516.222	868.642	1553.44	2028.01	2806.95	2375.43	1882.06	1194.38	1254.71	1596.39	673.522	697.95	723.264	749.497	776.68	804.85	834.042	864.292	895.639	928.124	961.786	996.67	1032.82	1070.28	1109.1	1149.32	1152.78	1156.25	1159.73	1163.22	1166.72	1170.23
104	0	0	0	0	0	0	5.91469	6.18471	32.4563	64.9126	110.14	119.105	127.618	135.651	143.172	150.144	156.524	162.264	167.303	171.57	174.979	211.214	243.753	225.436	254.858	278.215	290.792	21.8951	23.4172	25.0451	26.7862	28.6484	30.64	32.77	35.0482	37.4847	40.0905	42.8776	45.8584	49.0464	52.456	56.1027	60.0029	66.6699	74.0777	82.3085	91.4539	101.615	112.906
108	0	0	0	0	0	0	0	0	1.32956	2.65913	3.23907	4.66194	6.70753	9.64715	13.8696	19.9318	28.6306	41.1058	58.9855	72.6976	85.9598	102.983	119.374	135.102	150.127	164.409	177.253	189.278	191.916	193.749	195.697	197.772	199.989	202.365	204.918	207.673	210.658	213.905	217.458	221.366	225.695	230.528	235.972	242.173	249.331	257.73	267.794	280.192	296.056
112	0	0	0	0	0	0	0	0	11.1327	22.2654	51.9525	116.893	127.564	137.676	147.191	144.063	140.793	148.81	156.045	162.421	167.843	243.096	350.642	335.422	318.679	399.951	464.276	562.781	657.55	704.127	753.688	806.373	862.324	921.673	984.547	1051.06	1121.31	1195.37	1273.28	1355.04	1440.61	1529.85	1622.57	1718.43	1816.94	1917.44	2018.97	2120.25	2219.48
116	0	0	0	0	0	0	16.1531	22.4862	21.0145	42.0289	55.0305	58.2297	61.5582	65.0103	68.5772	72.2461	75.9991	79.8118	83.6514	85.7851	87.4894	92.934	97.5014	101.058	103.42	104.331	107.593	107.587	107.658	107.672	107.628	107.523	107.352	107.114	106.804	106.417	105.95	105.396	104.751	104.006	104.041	104.448	104.729	104.864	33.5266	44.7026	59.8695	80.1824	107.387
120	0	0	0	0	0	0	0	230.986	331.222	468.738	647.463	732.248	827.657	934.892	1055.25	1190.13	1340.98	1509.32	1696.65	1904.38	2133.73	2385.48	2659.69	2955.09	3268.07	3590.86	3907.51	4184.36	4119.77	4125.81	4132.17	4138.87	4145.95	4153.46	4161.45	4169.99	4179.14	4189	4199.68	4211.32	4224.11	4238.27	4254.12	4272.08	4292.72	4316.93	4346	4382.09	4428.99
124	0	0	0	0	0	0	0	0	0	0	0	0	0	0	0	0	0	0	0	0	0	0	0	0	0	0	0	0	0	0	0	0	0	0	40.9169	61.3753	92.063	138.095	225.502	338.253	507.38	761.07	1141.61	1712.41	2574.71	3137.2	4012.63	4046.69	5858.63
132	0	0	0	0	0	0	0	0	0	0	0	0	0	0	0	0	0	0	0	0	0	0	0	0	0	0	1.79302	3.3588	3.56812	3.83667	4.12472	4.4336	4.76471	5.11954	5.49966	5.90671	6.34242	6.80863	7.30723	7.84022	8.40967	9.01773	9.66663	10.3586	11.0961	11.8814	12.7169	13.6049	14.5478
136	0	0	0	0	0	0	0	0	0	0	0	0	0	0	0	0	0	0	0	0	0	0	0	0	0	0	0.725473	0.775907	0.823045	0.873046	0.926086	0.982348	1.04203	1.10533	1.17248	1.24372	1.31927	1.39942	1.48444	1.50384	1.5235	1.54342	1.56359	1.58403	1.60652	1.62933	1.65247	1.67593	1.69973
140	0	0	0	0	0	0	104.437	148.53	209.105	290.011	392.567	408.199	424.255	440.72	457.574	474.791	492.337	510.171	528.241	546.481	564.813	583.139	601.342	619.275	636.76	653.578	669.455	684.05	684.198	692.137	700.599	709.64	719.33	729.746	740.985	753.157	766.396	780.868	796.772	814.361	833.952	855.957	880.914	909.552	942.883	982.365	1030.19	1089.86	1167.39
144	0	0	0	0	0	0	0	0	10.5723	21.1446	23.0733	26.4596	29.6958	32.7728	35.6802	38.4062	40.9369	43.2563	45.345	47.18	48.7329	52.9077	56.4899	52.3701	47.6475	48.1445	55.7473	60.5613	60.1786	58.2813	56.4175	54.5858	52.7849	51.0131	49.2691	47.5512	45.8576	44.1865	42.5359	40.9036	46.8744	57.3259	203.848	214.577	225.871	237.758	250.272	263.444	277.31
148	0	0	0	0	0	0	610.536	1221.07	2442.14	4884.28	6003.27	6790.52	7676.72	8673.14	9792.04	11046.5	12450.5	14018.4	15764.7	16351.1	16883.9	17768.1	18560.4	19777.4	21359.1	22006.3	24530.4	26425.6	27093.3	27112.2	27133	27156.2	27182.1	27211	27243.4	27280	27321.5	27368.8	27423.1	27485.8	27558.9	27645	27747.5	27871.2	28023	28213	28456.7	28779.6	29226.4
152	0	0	0	0	0	0	0	0	0	0	0	0	0	0	0	0	0	0	0	0	0	0	0	0	0	0	373.352	746.704	766.558	786.939	807.863	829.343	851.393	874.03	897.269	921.125	945.615	970.756	996.565	1101.21	1216.84	1344.61	1663.52	2091.57	2465.77	2869.82	3253.98	3655.06	4221.26
156	0	0	0	0	5489.15	9148.58	15247.6	25412.7	42354.5	42354.5	75586.5	26803.1	22500.2	11414	15638.6	19417	26166	21715.4	17053	20648.8	19167.6	47239.5	53990.5	41892	37325.8	47809.5	51370.2	52091.4	54510.4	62606.5	66565.1	74907.9	93432.8	103241	115337	144445	156519	152999	179153	184809	203495	215278	224876	221054	181712	177919	177384	182470	186076
158	0	0	0	0	0	0	0	0	11.7807	23.5614	27.3952	26.9233	26.4341	25.9262	25.3976	24.846	24.2688	23.6627	23.0238	22.3474	21.6274	25.0271	28.0317	30.5819	32.5959	33.9562	31.3451	141.034	158.424	164.584	170.891	177.337	183.907	190.589	197.361	204.201	211.08	217.963	224.806	231.556	232.55	234.638	236.267	236.991	236.803	236.062	234.08	256.27	278.052
162	0	0	0	0	0	0	0	0	0	0	0	0	0	0	0	0	0	0	0	0	0	0	0	0	0	0	0	0	0	0	0	0	0	0	0	0	0	0	0	0	0	0	0	0	0	0	0	0	0
166	0	0	0	0	0	0	0	0	0	0	0	0	0	0	0	0	0	0	0	0	0	0	0	0	0	0	0	0	0	0	0	0	0	0	0	0	0	0	0	0	0	0	0	0	0	0	0	0	0
170	0	0	0	0	0	0	0	0	0	0	0	0	0	0	0	0	0	0	0	0	0	0	0	0	0	0	1883.6	3767.19	4050.75	4355.64	4683.48	5036.01	5415.06	5822.64	6260.91	6732.16	7238.88	7783.74	8369.62	8999.59	9676.98	10405.3	11188.5	12295.1	13511.1	14847.4	16315.8	17929.4	19702.7
174	0	0	0	0	0	0	0	0	0	0	0	0	0	0	0	0	0	0	0	1.12879	2.18732	2.53467	2.84393	3.10964	3.32445	3.47796	4.03918	4.4099	4.33929	4.59611	4.86613	5.14975	5.44731	5.75911	6.08537	6.42623	6.78172	7.15171	7.53591	7.93378	8.34452	8.76696	9.19951	9.64	10.0855	10.5324	10.9755	11.4084	11.8224
175	0	0	0	0	0	0	0	0	0	0	0	0	0	0	0	0	0	0	0	0	0	0	0	0	0	0	0	0	0	0	0	0	0	0	0	0	0	0	0	0	0	0	0	0	0	0	0	0	0
178	0	0	0	0	0	0	273.33	546.659	677.225	821.594	959.743	1078.74	1211.44	1359.14	1523.19	1704.96	1905.77	2126.88	2369.3	2633.75	2920.35	3228.38	3555.76	3898.32	4248.62	4593.94	4912.63	5166.74	5143.23	5139.9	5137.1	5134.91	5133.45	5132.84	5133.25	5134.87	5137.93	5142.73	5149.64	5159.15	5171.85	5188.55	5210.34	5238.68	5275.65	5324.28	5389.15	5477.6	5602.23
180	0	0	0	0	0	0	426.492	852.985	1021.62	1198.47	1352.26	1731.79	2218.66	2842.99	3643.07	4667.39	5977.07	7648.65	9777.23	10678.1	11484.7	12924.3	14185.1	15240.3	16855.3	18075.2	17750.4	16949.8	16874.2	16766.8	16656.3	16542.5	16425	16303.6	16178.1	16048.1	15913.3	15773.2	15627.6	15475.8	15317.3	15151.6	14978	14795.8	14604.4	14403.3	14192.2	13972.1	13746.3
184	0	0	0	0	0	0	0	0	0	0	0	0	0	0	0	0	0	0	0	0	0	0	0	0	0	0	0	0	0	0	0	0	0	0	0	0	0	0	0	0	0	0	0	0	0	0	0	0	0
188	0	0	0	0	0	0	0	0	0	0	0	0	0	0	0	0	0	0	0	0	0	0	0	0	0	0	3.88355	14.6074	16.1907	17.9354	19.8573	21.9739	24.304	26.8684	29.69	32.7935	36.2064	39.9585	46.0305	52.9463	64.3651	79.2091	95.1831	102.354	120.831	143.732	161.705	190.19	214.402
191	0	0	0	0	0	0	0	43.351	77.2127	137.524	244.944	238.99	233.389	227.919	222.577	217.361	212.266	413.919	707.381	988.322	1064.71	1432.51	1195.38	925.972	1120.55	846.926	842.893	819.005	773.172	738.054	698.78	655.071	606.63	603.927	599.992	594.729	588.038	579.809	572.205	573.718	573.313	570.752	565.775	558.098	571.929	582.229	588.07	588.371	581.863
192	0	0	0	0	0	0	0	0	0	0	0	0	0	0	0	0	0	0	0	0	0	0	0	0	0	0	36.2432	44.4157	50.6023	57.6506	65.6807	74.8293	85.2522	97.1269	110.656	126.069	143.629	163.634	186.427	212.394	261.247	320.156	392.348	408.168	423.218	443.961	466.345	489.858	631.524
196	0	0	0	0	0	1.98	3.13374	4.91279	7.59607	11.4899	16.6921	16.969	17.2339	17.4841	17.7165	17.9274	18.1124	18.2664	18.3829	15.6093	12.9451	12.4795	13.5732	15.236	10.8189	13.5115	7.47232	6.14766	6.06812	5.98644	5.90247	5.81603	5.72695	5.635	5.53996	5.44153	5.33941	5.23323	5.4951	5.73515	5.95153	6.14209	6.30422	6.79701	7.22942	7.59355	7.87904	8.07186	8.76204
203	0	0	0	0	0	14.6875	29.572	59.541	119.881	241.372	485.983	467.759	450.219	433.336	417.086	401.446	386.392	742.616	1250.84	1935.83	2281.52	3484.5	3678.08	4065.24	3908.89	3387.7	4137.84	4020.57	3815.55	3593.53	3354.5	3098.46	2825.42	2768.14	2704.9	2635.69	2560.5	2479.35	2401.79	2318.66	2559.14	2753.66	2699.67	2699.75	2691.83	2644.84	2547.63	2480.27	2403.17
204	0	0	0	0	0	13.9216	22.153	34.9884	54.6903	84.1826	126.365	142.619	160.886	181.396	204.403	230.185	259.043	291.299	327.303	367.42	412.036	461.542	516.333	576.783	633.181	685.179	687.977	640.166	588.969	541.848	498.481	458.568	421.836	388.033	356.925	328.298	301.956	277.717	255.413	238.561	222.812	208.093	194.339	181.485	184.461	187.477	190.533	193.629	196.766
208	0	0	0	0	0	3.50987	3.92603	4.39153	4.91222	5.49466	136.08	143.931	150.977	157.267	162.851	167.772	172.074	351.031	625.422	902.403	1014.01	1506.6	1367.59	1129.23	868.642	941.029	893.977	992.734	934.447	874.177	811.567	746.471	678.713	674.214	657.543	639.54	620.204	599.535	610.666	616.715	637.978	635.578	652.932	683.127	698.552	701.723	698.324	695.624	689.791
212	0	0	0	0	0	0	0	0	0	0	0	0	0	0	0	0	0	0	0	0	0	0	0	0	0	0	0.0982315	0.120382	0.137692	0.15749	0.180136	0.206038	0.235664	0.269551	0.308309	0.352642	0.403348	0.461346	0.527683	0.603559	0.690346	0.789611	0.883718	1.03459	1.10813	1.11451	0.776309	1.06898	1.24983
214	0	0	0	0	0	0	0	0	0	0	0	0	0	0	0	0	0	0	0	0	0	0	0	0	0	59.9123	59.9123	61.1849	62.4846	63.8119	65.1673	66.5516	67.9653	69.409	70.8834	72.3891	73.9268	75.4971	77.1008	80.9882	85.0717	89.361	93.8666	98.5994	126.874	163.257	211.16	271.378	335.94
218	0	0	0	0	0	0	0	0	0	0	0	0	0	0	0	0	0	0	0	0	0	0	0	0	0	0	175.359	231.714	237.399	243.085	248.773	254.462	260.153	265.844	271.537	277.231	282.926	288.623	297.585	306.549	394.192	463.258	544.013	571.189	590.072	625.266	634.221	638.715	669.654
222	0	0	0	0	0	0	0	0	0	0	0	0	0	0	0	0	0	0	0	0	0	0	0	0	0	0	15.4254	22.2653	23.0636	23.9477	24.952	26.1256	27.5408	29.3028	31.5669	37.8708	44.4054	51.1706	58.8116	66.8162	79.6688	93.1387	107.226	117.748	125.939	139.93	150.323	157.119	182.379
226	0	0	0	0	0	2.95355	3.63588	4.47256	5.49732	6.75081	8.28185	9.18429	10.1849	11.2945	12.5248	13.8889	15.4014	17.0784	18.9378	21.2619	23.5762	23.5279	23.4794	35.1459	40.918	46.6651	49.4768	52.2757	52.5275	52.7802	53.0481	53.333	53.6371	53.9629	54.3134	54.6924	55.1045	55.5556	56.0532	56.6072	57.2309	57.9429	58.7699	59.7531	60.9594	62.509	64.6504	68.0384	75.5818
231	0	0	0	0	0	732.38	973.997	1283.23	1667.81	2121.58	2595.08	3119.33	3746.02	4494.01	5385.14	6444.59	7701.06	9186.89	10937.8	10625.8	10294.3	9939.97	9558.39	9143.64	8687.4	8177.43	7594.42	6904.78	6976.69	7043.39	7104.66	7160.25	7209.88	7253.25	7290.04	7319.87	7342.34	7357	7363.33	7360.75	10115.8	12751.4	15259.9	17632.4	19858.5	21926.1	23820.5	25524.2	27015.3
232	0	0	0	0	0	199.121	237.198	280.263	327.365	375.786	418.81	444.761	472.032	500.64	530.592	561.883	594.488	628.361	663.426	685.692	705.739	792.272	872.642	1000.67	1117.99	1223.44	1325.37	1411.22	1429.8	1451.99	1475.73	1501.2	1528.61	1558.22	1590.33	1625.3	1663.57	1705.67	1752.28	1804.23	1862.6	1928.79	2004.68	2092.83	2196.83	2321.97	2476.36	2673.25	2936.07
233	0	0	0	0	0	0	0	1.82775	7.311	29.244	116.976	246.265	254.495	262.717	270.875	278.904	286.721	294.226	301.291	307.76	313.432	318.05	321.275	322.649	321.53	316.972	307.477	290.389	334.387	384.845	442.662	508.843	584.516	670.934	769.487	881.701	1009.24	1153.89	1317.55	1471.54	1640.73	1825.75	2026.92	2244.05	2253.27	2253.18	2241.3	2214.21	2167
234	0	0	0	0	0	0.979166	1.38736	1.94734	2.71464	3.76445	3.97858	4.07326	4.17006	4.26903	4.3702	4.47364	4.57938	4.68749	4.798	4.91099	5.02649	5.14457	5.26528	5.38867	5.51482	5.64377	5.7756	5.91035	7.39004	9.24018	11.5535	14.446	18.0626	22.5847	28.2388	35.3086	44.1482	55.2008	69.0205	86.3	107.905	134.92	168.697	210.931	263.737	329.764	412.321	515.546	644.613
238	0	0	0	0	0	0	0	0	0	0	0	0	0	0	0	0	0	0	0	0	0	0	0	0	0	0	0	0	0	0	0	0	0	0	0	0	0	0	0	0	0	0	0	0	0	0	0	0	0
242	0	0	0	0	0	0	0	0	0	2.87574	3.22528	3.53712	3.87705	4.24718	4.64972	5.0869	5.56099	6.07419	6.62864	7.22625	7.86865	8.55702	9.29181	10.0725	10.8973	11.7624	12.6611	13.583	14.2448	14.9382	15.6647	16.4259	17.2232	18.0584	18.9332	19.8495	20.809	21.8139	22.866	24.0343	25.2608	26.5484	27.9001	29.3188	30.1928	31.0909	32.4644	33.8236	35.1685
246	0	0	0	0	0	0.834902	1.18926	1.49153	1.72964	2.19767	5.47322	4.03392	5.28045	6.47319	7.60871	8.68309	9.69177	10.6294	11.4896	13.8258	15.9662	17.888	19.5623	20.9505	18.0327	16.8906	31.1376	55.912	60.3467	65.0988	70.1847	75.6207	81.4222	87.6031	94.1755	101.148	108.527	116.311	124.494	133.057	151.494	156.859	172.547	176.651	183.357	192.188	212.225	230.274	249.234
250	0	0	0	0	0	68.1313	135.314	269.632	670.109	1342.8	3360.16	3725.34	4044.85	3445.88	2887.02	2639.86	2407.46	4876.55	8633.57	13635.5	16329	24736.3	26464.7	29748.8	23737.2	23317.7	23389.5	27290.4	25890.4	24376.3	22748.1	21006	19149.8	18739.3	18290.3	17802.8	17277	16712.7	17320.9	17710.3	17782.1	18003	18150.1	17843.2	17408.3	17224.4	16863.9	16392.1	15894.8
254	0	0	0	0	0	0	0	0	0	0	0	0	0	0	0	0	0	0	0	0	0	0	0	0	0	0	0.109637	0.158252	0.18013	0.204916	0.232986	0.264764	0.300727	0.341414	0.387429	0.439455	0.498259	0.564705	0.646861	0.740303	0.846522	0.967207	1.10426	1.14949	1.19114	1.22785	1.25802	1.27973	1.29074
258	0	0	0	0	0	0	0	0	0	0	0.00342939	0.00509756	0.00757523	0.0112542	0.016715	0.0248181	0.0368375	0.0546591	0.081073	0.120204	0.178148	0.263905	0.390752	0.578264	0.855272	1.26419	1.86735	2.75624	2.89651	3.04389	3.19874	3.36144	3.53238	3.71199	3.9007	4.09896	4.30726	4.52611	4.75603	5.01147	5.28058	5.56409	5.86276	6.17741	6.37894	6.58699	6.80175	7.02344	7.25228
262	0	0	0	0	0	13.9109	21.5663	33.3353	51.3993	79.0853	121.465	124.226	127.048	129.932	132.879	135.891	138.97	142.116	145.331	153.736	162.175	195.024	228.01	261.131	294.387	327.776	348.981	370.268	369.866	373.521	377.371	381.435	385.738	390.305	395.168	400.364	405.938	411.942	418.442	425.517	433.269	441.825	451.352	462.071	474.285	488.423	505.119	525.359	550.802
266	0	0	0	0	0	0	0	0	80.0332	124.856	193.977	222.425	255.036	292.419	335.271	384.391	440.694	505.229	579.197	663.976	761.143	872.506	1000.13	1146.4	1314.03	1506.12	1726.26	1978.52	2019.47	2038.73	2059.01	2080.4	2103.02	2127.01	2152.54	2179.79	2208.99	2240.42	2274.42	2311.38	2351.83	2396.43	2446.02	2501.75	2565.16	2638.43	2724.81	2829.31	2960.36
268	0	0	0	0	0	4.5672	10.6568	24.8659	58.0204	135.381	315.889	676.904	712.022	748.156	785.172	822.89	861.07	899.397	937.456	961.005	979.42	1416.28	1812.21	2163.2	1636.99	1918.23	2119.71	2220.72	1395.26	1491.17	1592.74	1700.17	1813.6	1933.14	2058.86	2190.75	2328.69	2472.49	2621.78	2775.99	2934.32	3095.61	3258.28	3420.14	3578.2	3728.33	3864.78	3979.32	4059.84
270	0	0	0	0	0	0.103454	0.14545	0.203007	0.281782	0.389432	0.536335	0.61484	0.704817	0.807938	0.926122	1.06157	1.21679	1.39467	1.59851	1.83211	2.09978	2.40651	2.75798	3.16071	3.62216	4.15089	4.7567	5.4508	4.92291	4.44614	4.01555	3.62665	3.27542	2.9582	2.67171	2.41296	2.17927	1.96821	1.77759	2.66709	4.00169	6.00412	9.00856	13.5164	20.2799	30.4279	45.6538	68.4988	102.775
275	0	0	0	0	0	11.3766	14.4403	18.173	22.5944	27.5719	32.5727	32.8035	33.0129	33.1981	31.9367	30.6944	29.4695	28.2602	27.0645	25.8801	24.7045	23.5346	22.3668	21.1965	20.0182	18.8246	17.6058	16.3481	18.0604	19.9501	22.0352	24.3356	26.8731	29.6718	32.7579	36.1605	39.9113	44.0452	46.8646	49.8571	53.0326	56.4011	59.9736	63.7611	63.8959	64.0185	64.1284	64.2247	64.3066
276	0	0	0	0	0	29.571	57.903	107.444	212.6	422.419	2041.2	2126.25	2201.74	2117.06	2035.63	1817.53	1613.19	3226.38	5646.17	8065.96	8872.56	12905.5	15325.3	16938.5	14115.4	14115.4	15325.3	16131.9	16019	15720.7	15236.8	14567.3	13712.1	13844.8	13911.1	13911.1	13844.8	13712.1	13170.3	12530.5	12758.6	12659.9	12098.9	11676.3	11348.3	11076.8	10474	10082.5	11398.3
288	0	0	0	0	0	0	0	72.0644	112.507	174.895	270.94	310.595	356.044	408.131	467.827	536.239	614.64	704.486	807.445	925.428	1060.63	1215.54	1393.06	1596.46	1829.52	2096.56	2402.52	2753.07	2776.01	2800.08	2825.39	2852.07	2880.26	2910.12	2941.86	2975.7	3011.92	3050.85	3092.89	3138.54	3188.42	3243.31	3304.24	3372.56	3450.11	3539.5	3644.56	3771.22	3929.38
292	0	0	0	0	0	0	0	0	0	0	0	0	0	0	0	0	0	0	0	0	0	0	0	0	0	0	0	0	0	0	0	0	0	0	0	0	0	0	0	0	0	0	0	0	0	0	0	0	0
296	0	0	0	0	0	0	0	0	0	0	0	0	0	0	0	0	0	0	0	0	0	0	0	0	0	0	0	0	0	0	0	0	0	0	0	0	0	0	0	0	0	0	0	0	0	0	0	0	0
300	0	0	0	0	0	13.9809	28.4839	57.975	176.845	598.905	1216.08	1217.88	1219.67	1068.77	917.427	704.382	490.713	522.133	553.639	585.231	616.908	667.203	723.822	774.399	558.346	621.248	933.163	934.45	976.739	1019.04	1061.35	1103.67	1146.01	1188.35	1230.71	1273.08	1315.46	1357.85	1400.26	1442.67	1581.42	1733.3	1900.22	2082.78	2283.51	2528.62	2799.42	3099.64	3323.73
304	0	0	0	0	0	0	0	0	0	0	0	0	0	0	0	0	0	0	0	0	0	0	0	0	0	0	0	0	0	0	0	0	0	0	0	0	0	0	0	0	0	0	0	0	0	0	0	0	0
308	0	0	0	0	0	0	0	0	0	0	0	0	0	0	0	0	0	0	0	0	0	0	0	0	0	0	0.496302	0.716371	0.794019	0.879584	0.97384	1.07764	1.19191	1.31768	1.45605	1.60826	1.77563	1.95964	2.18586	2.3265	2.47409	2.62893	2.79135	2.70228	2.60708	2.50209	2.38677	2.26051	2.12271
312	0	0	0	0	0	0	0	0	0	0	0	0	0	0	0	0	0	0	0	0	0	0	0	0	0	0	4.99591	5.34322	5.66783	6.01216	6.37742	6.76486	7.17584	7.61179	8.07422	8.56474	9.08507	9.63701	10.2225	10.3561	10.4915	10.6286	10.7676	10.9083	11.0632	11.2203	11.3796	11.5412	11.705
316	0	0	0	0	0	0.0243552	0.0289203	0.0340207	0.0394807	0.0448444	0.0489824	0.0601926	0.0739004	0.090637	0.111036	0.135851	0.165966	0.202413	0.246381	0.299209	0.36237	0.43741	0.525831	0.628857	0.746991	0.879159	1.021	1.16112	1.20872	1.25779	1.30832	1.36027	1.41362	1.4683	1.52426	1.58138	1.63957	1.69867	1.7585	1.8239	1.88988	1.95611	2.02218	2.08757	2.1087	2.12614	2.13913	2.14675	2.14786
320	0	0	0	0	0	0	0	0	0	0	0	0	0	0	0	0	0	0	0	0	0	0	0	0	0	0	113.84	175.668	177.543	179.335	181.048	182.682	184.24	185.723	187.133	188.471	189.74	190.941	194.206	197.349	229.247	265.204	306.567	326.07	340.336	343.005	332.936	320.856	322.844
324	0	0	0	0	0	0	0	0	162.156	252.93	392.902	450.517	516.564	592.275	679.062	778.541	892.567	1023.26	1173.06	1344.75	1541.53	1767.06	2025.52	2321.72	2661.18	3050.18	3495.97	4006.8	4040.26	4075.37	4112.28	4151.19	4192.29	4235.83	4282.1	4331.44	4384.24	4440.99	4502.27	4568.8	4641.49	4721.49	4810.27	4909.82	5022.81	5153.04	5306.09	5490.59	5720.96
328	0	0	0	0	0	0	0	0	0	0	0	0	0	0	0	0	0	0	0	0	0	0	0	0	0	0	111.935	164.166	176.184	188.973	202.582	217.058	232.453	248.822	266.223	284.718	304.369	325.247	351.276	380.86	412.585	446.595	483.042	476.363	481.282	483.713	483.207	479.258	471.295
332	0	0	0	0	0	0	0	0	0	0	0	0	0	0	0	0	0	0	0	0	0	0	0	0	0	0	3.63517	6.01227	7.69887	9.85301	12.603	16.1123	20.5884	26.2957	33.5697	42.8373	54.6406	69.6682	89.7794	115.592	134.443	148.123	163.073	170.042	174.684	172.715	179.681	185.594	195.361
334	0	0	0	0	0	0	0	0	0	0	0	0	0	0	0	0	0	0	0	0	0	0	0	0	0	0	0	0	0	0	0	0	0	0	0	0	0	0	0	0	0	0	0	0	0	0	0	0	0
336	0	0	0	0	0	0	0	0	0	0	0	0	0	0	0	0	0	0	0	0	0	0	0	0	0	0	0	0	0	0	0	0	0	0	0	0	0	0	0	0	0	0	0	0	0	0	0	0	0
340	0	0	0	0	0	0	0	0	0	0	0	0	0	0	0	0	0	0	0	0	0	0	0	0	0	0	166.738	63.0334	66.7994	70.7502	74.8941	79.2396	83.7957	88.5719	93.5778	98.8236	104.32	110.078	117.396	125.089	245.206	294.172	352.649	367.832	369.432	369.101	366.533	361.386	353.279
344	0	0	0	0	0	0	0	0	0	0	0	0	0	0	0	0	0	0	0	0	0	0	0	0	0	0	0	0	0	0	0	0	0	0	0	0	0	0	0	0	0	0	0	0	0	0	0	0	0
348	0	0	0	0	0	37.0137	49.6828	66.6884	134.272	202.76	204.12	196.27	188.721	181.462	174.483	139.81	107.546	258.111	521.185	955.966	1267.51	1935.83	2043.38	2352.57	2171.61	1960.48	1596.39	1861.38	1904.49	1916.86	1898.48	1849.36	1769.49	1811.17	1842.07	1862.17	1871.47	1869.99	1874.08	1869	2001.73	2109.1	2112.29	2074.2	2045.54	2041.84	2035.68	2065.21	2048.72
352	0	0	0	0	0	2.57539	5.47349	11.5241	24.0972	50.124	103.831	106.302	108.828	111.411	114.051	116.751	119.51	122.332	125.216	314.002	629.919	884.551	887.2	889.832	764.956	767.186	641.17	637.202	650.391	663.853	677.594	691.619	705.934	720.545	735.458	750.68	766.217	782.075	798.261	831.756	866.657	903.022	940.912	980.393	990.574	1000.86	1011.25	1021.75	1032.36
356	0	0	0	0	0	0	0	85.9503	171.901	343.801	687.602	1375.2	1440.69	1506.18	1571.66	1637.15	1702.63	1768.12	1833.61	1899.09	1964.58	2030.06	2095.55	2161.04	2226.52	2292.01	2357.49	2881.38	2945.41	3009.44	3073.47	3137.5	3201.53	3265.57	3329.6	3393.63	3457.66	3521.69	3585.72	3579.9	3771.99	3702.14	4051.4	4260.95	4470.51	4491.46	4883.09	4968.2	4610.99
360	0	0	0	0	0	19.6372	24.7112	31.0963	229.57	430.707	634.533	676.524	716.624	754.892	791.383	826.154	859.256	890.743	920.665	949.07	976.008	1063.19	1146.58	1226.29	1532.86	1826.93	1964.45	2152.51	2132.51	2112.48	2092.41	2072.31	2052.2	2112.56	2169.76	2223.91	2275.1	2323.43	2405.43	2483.33	2557.24	2627.3	2693.63	3367.04	4013.01	4632.34	5225.85	5794.3	6846.72
364	0	0	0	194.67	532.442	1005.75	1762.07	2520.09	3279.81	4041.23	8091.53	8429.61	8767.78	9106.02	9444.33	9782.72	10121.2	9211.31	8301.23	8707.14	9113.13	9620.49	10128	7090.36	7597.66	8105.08	10132.5	10133.6	10562.3	10785.7	11013.8	11246.8	11484.7	11727.6	11975.7	12229	12487.7	12751.9	13021.6	13297.1	14049.2	14801.4	15553.6	16305.8	17058.1	19672.2	22286.5	24286.5	26286.6
368	0	0	0	25.3395	28.4151	52.0634	157.371	264.223	465.734	670.044	539.75	567.124	594.535	594.94	595.344	568.668	541.954	949.06	1356.71	1221.86	1086.83	951.612	748.194	544.504	544.866	545.228	681.987	545.95	546.079	546.207	546.336	546.464	546.593	546.722	546.85	546.979	547.107	547.236	576.076	606.436	638.395	672.039	707.456	744.74	851.187	972.85	1111.9	1270.83	1452.47
372	0	0	0	0	0	0.0491772	0.196709	0.786835	3.14734	12.5894	50.3574	102.77	109.237	116.111	123.417	131.183	139.438	273.184	469.067	681.126	760.505	1290.55	1532.53	1505.65	1302.96	1254.71	1596.39	3102.29	3502.25	3322.83	3126.87	2913.45	2681.59	2583.26	2483.28	2664.75	3037.73	3117.58	3907.89	4992.68	5908.41	6734.77	5904.32	5298.37	5213.06	5274.68	5027.3	4993.38	5126.58
376	0	0	0	9.16037	13.21	18.9496	26.9953	38.0947	53.0238	72.2125	94.4926	139.305	205.175	301.871	221.805	162.756	119.243	87.2097	63.6506	56.6419	49.8437	49.6805	49.25	48.5033	33.4393	39.2203	36.2486	26.1508	28.1382	30.0586	31.9091	33.6866	35.3877	37.0084	38.5445	39.9913	41.3434	42.5949	43.4801	44.7673	46.0285	47.2501	48.4153	49.5032	49.005	48.3648	47.5561	46.5442	45.2825
380	0	0	0	0	0	33.6534	65.2523	125.801	400.891	756.498	2597.61	2440.92	2285.89	2132.6	1981.12	1307.79	647.748	956.942	1255.07	1386.82	1571.23	1921.51	2451.7	3505.74	2171.65	2349.64	3301.12	3144.45	3216.27	3300.59	3385.98	3472.32	3559.44	3647.16	3735.25	3823.44	3911.41	3998.76	4085.03	4169.65	4382.58	4601.33	4824.84	5051.27	5068.44	5259.63	5487.13	5670.05	5862.22
384	0	0	0	0	0	69.5504	103.44	152.418	223.06	324.747	470.849	539.896	619.048	709.781	813.788	933.007	1069.66	1226.29	1405.82	1611.58	1847.4	2117.68	2427.44	2782.42	3189.24	3655.45	4189.7	4801.92	4835.97	4871.65	4909.1	4948.51	4990.07	5034.02	5080.63	5130.23	5183.21	5240.02	5301.22	5367.51	5439.73	5518.99	5606.68	5704.66	5815.46	5942.62	6091.35	6269.65	6490.79
388	0	0	0	0	0	0	0	0	0	0	0	0	0	0	0	0	0	0	0	0	0	0	0	0	0	0	15.9924	10.5801	12.6449	15.104	18.0317	21.5156	25.66	30.5883	36.4464	43.4077	51.6769	61.4968	73.9658	78.2444	82.7003	87.3399	92.1698	88.6844	93.7356	98.5573	102.998	106.871	109.946
392	0	0	0	0	0	16.4916	23.4909	33.1439	46.1212	62.7855	82.0873	134.445	184.788	284.774	380.369	558.093	726.734	1062.7	1263.55	1426.79	1294.17	1289.17	1277.04	1389.73	1676.14	2076.18	2644.46	3726.61	3995.09	3941.13	3885.65	3828.54	3769.68	3683.33	3595.79	3506.93	3416.57	3324.54	3346.82	3361.67	3368.38	3366.12	3353.86	3368.29	3367.29	3469.79	3613.91	3835.74	4061.24
398	0	0	0	0	22.863	53.347	124.476	290.445	677.704	1581.31	3689.72	7906.55	8499.16	9135.89	9820.02	10555.1	11344.8	12193.2	13104.7	13443.8	13784.4	14126.6	14470.3	16176.3	18194.9	20376.9	23333.4	26306.1	26063.3	25820.4	25577.3	25334.1	25090.7	24847.2	24603.6	24359.7	24115.8	23871.7	23627.4	23383.1	23138.5	22893.8	22649	22404	22158.9	28525.2	33698.6	45731	57770.1
400	0	0	0	15.1174	20.3659	27.2544	36.299	48.1756	63.7714	84.2513	111.146	159.889	230.004	330.858	254.565	195.861	150.691	115.937	89.196	82.1082	74.9834	77.4698	79.9663	82.4731	60.0441	75.8868	76.0649	60.4679	61.9238	62.0622	62.201	62.3401	62.4795	62.6191	62.7591	62.8994	63.04	63.1809	63.3221	63.4636	66.8191	70.3521	74.0719	77.9883	82.1118	102.663	128.358	160.485	200.652
404	0	0	0	0	0	473.626	578.349	703.777	851.242	1018.43	1191.97	1474.44	1822.81	2252.02	2780.29	3429.65	4226.7	5203.35	6397.6	7330.62	8213.62	9441.24	10582.8	11622.6	12538.2	13296.5	14772.3	15822.4	16074.9	16126.1	16180	16236.7	16296.6	16360	16427.4	16499.2	16576.1	16658.7	16747.9	16844.9	16951.1	17068.1	17198.5	17345.3	17512.9	17707.8	17939.5	18223.6	18586.9
408	0	0	0	0	0	13.7252	16.292	19.1556	22.2132	25.1992	27.4548	34.516	43.3513	54.3897	68.1561	85.2897	106.563	132.903	165.404	180.571	194.116	224.552	287.317	205.589	227.071	243.04	279.965	313.982	340.404	353.477	366.84	380.468	394.331	408.389	422.596	436.893	451.209	465.455	479.526	493.289	489.722	479.225	467.866	455.514	442.006	426.902	412.444	395.747	376.177
410	0	0	0	0	0	13.741	16.3107	19.1776	22.2387	25.2281	27.4863	37.127	50.1008	67.5354	90.9268	122.252	164.112	219.907	294.051	321.014	345.093	399.203	510.784	365.49	403.68	432.068	497.711	558.184	605.816	640.316	676.389	714.044	753.275	794.061	836.357	880.091	925.159	971.412	1018.65	1066.59	1052.96	1027.29	999.923	979.209	955.606	923.29	887.375	847.038	813.203
414	0	0	0	0	0	3.4131	5.10411	7.63272	11.4137	17.0671	25.52	26.3916	27.293	28.2251	29.1891	30.186	31.217	32.2831	33.3857	33.375	33.3643	33.3537	33.343	33.3323	33.3216	33.3109	65.1525	56.4473	57.7092	58.2903	58.8771	59.4699	60.0687	60.6735	61.2844	61.9014	62.5247	63.1542	63.7901	64.4323	65.0811	65.7363	66.3982	67.0667	67.742	68.424	69.113	69.8088	70.5117
417	0	0	0	0	5.54516	12.9387	30.1903	70.4441	164.37	383.529	894.901	1917.64	2017.82	2121.02	2226.91	2335.02	2444.71	2555.17	2665.29	2701.3	2725.41	2841.29	2933.52	2998.34	3030.61	3022.92	3204.19	3270.1	3414.69	3561.67	3713.34	3869.62	4030.4	4195.52	4364.76	4537.83	4714.34	4893.81	5075.63	5259.06	5443.15	5626.74	5808.4	5986.35	6158.37	6321.71	6472.86	6607.36	6719.43
418	0	0	0	0	0	15.4921	19.1091	23.5576	29.0243	35.7361	43.9684	47.2225	50.7171	54.4698	58.4997	62.8272	67.4744	72.4646	77.8233	91.2569	104.644	117.984	131.278	144.524	157.723	170.873	213.217	255.41	259.621	263.831	268.038	272.245	276.45	280.653	284.855	289.055	293.254	297.451	331.386	365.31	399.221	433.12	467.007	500.882	534.745	568.595	602.434	636.26	617.041
422	0	0	0	25.6499	34.582	46.4009	61.8732	81.8183	106.921	137.227	170.748	191.672	215.019	241.038	211.297	185.065	161.932	141.538	123.562	113.747	104.139	107.192	109.793	111.892	86.5091	89.3378	100.099	81.7572	77.1888	75.2829	73.4181	71.5933	69.8078	68.0607	66.351	64.6781	63.041	61.4389	59.8711	58.3368	63.0715	67.1459	71.4745	76.0723	80.9548	95.9787	96.2649	106.319	106.603
426	0	0	0	0	0	0	0.019425	0.0404728	0.0899736	0.220352	0.633675	0.783294	0.971347	1.20874	1.50986	1.8938	2.38619	3.02169	3.84772	4.92995	6.36052	8.2707	10.8508	14.3821	19.2903	26.2366	36.2814	202.69	225.115	248.964	274.4	301.619	330.848	362.358	396.477	433.596	474.199	518.883	568.396	623.694	686.016	701.355	720.018	743.027	771.877	808.834	857.529	924.173	1020.42
428	0	0	0	0	0	0	0.0428408	0.171363	0.685452	2.74181	10.9672	23.0889	23.8968	24.7107	25.5267	26.3399	27.1446	27.9336	28.6982	29.4274	30.1077	30.7221	31.2488	31.6597	31.9173	31.9704	31.746	31.1341	36.0345	41.6981	48.2418	55.8005	64.5288	74.6044	86.2315	99.6439	115.11	132.936	153.474	173.51	196.09	221.523	250.15	282.349	309.692	339.505	371.977	407.305	445.688
430	0	0	0	0	0	26.1574	41.5942	65.5673	102.693	160.045	248.446	262.371	277.069	292.581	308.952	326.23	344.464	363.707	384.014	405.443	428.057	451.921	477.102	503.673	531.711	561.296	592.513	625.451	631.307	637.46	643.937	650.772	658.004	665.675	673.84	682.559	691.906	701.97	712.857	724.702	737.669	751.973	767.887	785.779	806.15	829.707	857.498	891.152	933.4
434	0	0	0	0	0	268.661	428.219	676.171	1060.39	1654.24	2570.01	2900.87	3233.78	2919.88	2603.82	2742.74	2882.43	3022.9	3164.12	3239.97	3316.17	2328.33	1334.46	2007.62	2684.7	3365.65	3375.37	3385.04	3150.11	3172.46	3194.82	3217.19	3239.57	3261.97	3284.37	3306.79	3329.22	3351.66	3374.11	3654.71	3688.15	3721.6	3755.07	3788.56	3822.07	3855.6	4083.91	4660.68	4848.28
438	0	0	0	0	0	1.74889	2.01215	2.31503	2.6635	3.06444	3.52572	3.4593	3.39413	3.33019	3.26746	3.2059	3.14551	6.16263	10.5814	14.8535	16.0769	20.8791	16.8666	12.6817	14.9313	11.0038	9.14311	9.0653	8.58631	8.07681	7.53553	6.96118	6.35243	6.23191	6.10103	5.95935	5.80639	5.64166	5.60681	5.56645	5.52034	5.4682	5.40977	5.34473	5.27281	5.19369	5.10704	5.01253	4.90982
440	0	0	0	0	0	0	0.7318	2.9272	11.7088	46.8352	187.341	394.402	407.582	420.75	433.816	446.675	459.194	471.213	482.528	492.888	501.973	509.369	514.534	516.735	514.943	507.644	492.438	465.072	535.537	616.35	708.946	814.939	936.134	1074.54	1232.38	1412.1	1616.36	1848.03	2110.15	2356.77	2627.74	2924.07	3246.27	3594.02	3855.56	4119.05	4377.5	4620.32	4831.05
442	0	0	0	0	0	3.95729	5.97577	9.02382	13.6266	20.577	31.0727	30.4874	29.913	29.3495	28.7966	28.2541	27.7219	54.3122	93.2559	130.907	141.688	184.011	148.648	111.766	131.592	96.9783	80.5797	79.8939	77.9968	75.622	72.7211	69.2417	65.1273	65.8541	66.4513	66.9017	67.1866	67.2856	68.2198	72.8159	77.5673	82.4489	87.428	92.4623	88.3308	88.6601	88.333	87.3495	85.7096
446	0	0	0	0	0	0	0	0	0	0	0	0	0	0	0	0	0	0	0	0	0	0	0	0	0	0	0	0	0	0	0	0	0	0	0	0	0	0	0	0	0	0	0	0	0	0	0	0	0
450	0	0	0	0	0	1.0781	1.53818	2.17522	3.03726	4.15803	5.49701	10.8225	21.2909	41.8489	82.1791	161.204	315.842	617.984	1207.29	1765.78	2290.92	3150.3	3945.76	4670.17	5314.44	6659.42	7662.72	8454.24	8553.23	8612.18	8675.49	8743.7	8817.42	8897.35	8984.37	9079.48	9183.94	9299.26	9427.3	9570.41	9731.58	9914.68	10124.8	10368.9	10656.7	11002	11426.1	11962.7	12670
454	0	0	0	0	0	4.34837	5.4716	6.88608	8.6677	10.9123	13.7409	16.8001	20.5403	25.1133	30.7043	37.54	45.8975	56.1157	68.6087	80.6885	92.7762	111.368	129.973	148.59	167.219	185.86	201.725	217.601	221.06	225.292	229.795	234.602	239.747	245.273	251.232	257.682	264.697	272.366	280.799	290.134	300.547	312.267	325.597	340.951	358.908	380.312	406.454	439.424	482.899
458	0	0	0	0	0	0.960738	1.14043	1.34091	1.55499	1.76411	1.92222	2.83349	4.17274	6.13838	9.01905	13.2335	19.3869	28.3503	41.3711	42.3789	43.1627	49.7678	55.5908	60.5126	64.3692	66.9234	77.12	83.0862	84.8592	86.5272	88.0849	89.5266	90.846	92.0358	93.0881	93.9939	94.7429	95.3233	97.9847	100.347	102.383	104.063	105.349	132.746	157.85	180.384	199.992	212.287	234.03
462	0	0	0	0	0	0.0015556	0.00184652	0.00217108	0.00251763	0.00285607	0.00311174	0.00458684	0.00675468	0.00993639	0.0145991	0.0214204	0.0313796	0.0458864	0.0669584	0.0974646	0.141447	0.204533	0.294416	0.42134	0.598333	0.840549	1.16192	1.56378	1.57206	1.57954	1.58614	1.59176	1.5963	1.59965	1.60166	1.6022	1.60109	1.59814	1.59311	1.63886	1.68306	1.72503	1.76396	1.79879	1.92975	2.06171	2.19119	2.3129	2.41863
466	0	0	0	0	0	7.03047	17.9109	44.4299	107.589	254.89	591.917	705.969	841.845	1003.69	1196.44	1425.95	1699.2	2024.44	2411.53	2652.75	2909.51	3258.39	3630.74	4098.57	4741.87	5346.46	6492.79	7722.74	7890.91	8010.86	8136.58	8268.63	8407.7	8554.56	8710.13	8875.49	9051.93	9241	9444.62	9665.12	9905.46	10169.4	10461.8	10789.3	11160.7	11588.9	12092.6	12701.5	13465.5
470	0	0	0	0	0	0	0	0	0	0	0	0	0	0	0	0	0	0	0	0	0	0	0	0	0	0	0	0	0	0	0	0	0	0	0	0	0	0	0	0	0	0	0	0	0	0	0	0	0
474	0	0	0	0	0	0	0	0	0	0	0	0	0	0	0	0	0	0	0	0	0	0	0	0	0	0	1.46668	0.970307	1.15967	1.3852	1.6537	1.97322	2.35331	2.80528	3.34254	3.98096	4.73934	5.63993	6.78348	7.22796	7.69504	8.18574	8.70113	8.43287	8.42633	8.37583	8.27512	8.1173	7.8947
478	0	0	0	0	0	6.68369e-08	1.78232e-07	4.75285e-07	1.26743e-06	3.3798e-06	9.01281e-06	2.06007e-05	4.70873e-05	0.000107628	0.000246007	0.000562302	0.00128526	0.00293774	0.00671484	0.0141758	0.0298437	0.064164	0.137281	0.305378	0.666279	1.4325	3.3425	7.64	15.4466	31.1005	62.6367	126.191	254.32	512.742	1034.19	2086.94	4213.53	8512.18	17207.9	17411.8	17633.7	17877	18146	18446.2	18785.4	19174.2	19628.2	20171.6	20844.2
480	0	0	0	0	0	0	0	0	0	0	0	0	0	0	0	0	0	0	0	0	0	0	0	0	0	0	2.96355	3.87392	4.74746	5.81796	7.12985	8.73757	10.7078	13.1223	16.0813	19.7074	24.1513	29.5971	36.271	44.4497	54.4727	85.8376	72.9332	66.1339	61.48	62.1028	56.5107	49.057	41.2866
484	0	0	0	0	0	0	0	0	0	0	0	0	0	0	0	0	0	0	0	0	0	0	0	0	0	0	5903.48	11807	12546.9	13253.2	13927.1	14569.4	15181.1	15763.3	16316.8	16842.5	17341.4	17814.2	18261.8	18685	19084.6	19461.3	19815.9	20149.2	20461.7	20754.2	24947.7	28089.7	31568
492	0	0	0	0	0	0	0	0	0	0	0	0	0	0	0	0	0	0	0	0	0	0	0	0	0	0	0	0	0	0	0	0	0	0	0	0	0	0	0	0	0	0	0	0	0	0	0	0	0
496	0	0	0	0	0	3582.14	4912.93	6747.83	9287.89	12824.7	17790.8	18801.3	19869.4	20998.6	22192.5	23454.9	24789.9	26201.9	27695.7	29640.9	31667.6	42223.5	53299.9	58083.2	42051.2	43129.4	44235.3	45369.6	46275.2	47620.5	49004.9	50429.5	51895.6	53404.3	54956.8	56554.4	58198.6	59890.5	61631.5	63423.3	65634.6	68458.5	71403.9	74476.1	77680.4	81813.1	92302	104136	117486
498	0	0	0	0	0	10.1433	11.2477	12.3587	13.4013	14.234	14.5653	15.3507	16.1647	17.0057	17.8715	18.759	19.6641	20.5812	21.5029	22.4198	23.2155	33.7075	48.769	46.8342	44.7249	56.527	66.2948	81.6872	53.3757	57.2899	61.4748	65.9469	70.7233	75.8216	81.2599	87.0571	93.2319	99.8035	106.791	114.213	122.089	130.434	139.265	148.596	158.437	168.795	179.672	191.062	202.951
500	0	0	0	0	0	4.02497e-07	7.64762e-07	1.43956e-06	2.67338e-06	4.85977e-06	8.49751e-06	1.6709e-05	3.28256e-05	6.44222e-05	0.000126289	0.00024725	0.000483367	0.000943389	0.00183766	0.00357152	0.00692263	0.0133744	0.0257357	0.0492717	0	0	0	0.599608	0.641801	0.686716	0.734491	0.785265	0.839178	0.896363	0.956952	1.02106	1.08881	1.16028	1.23555	1.25555	1.27475	1.29297	1.31001	1.32563	1.34105	1.35447	1.36549	1.37363	1.37828
504	0	0	0	0	0	141.803	224.765	353.482	552.648	860.081	1333.63	1429.46	1532.13	1642.13	1759.98	1886.23	2021.48	2166.37	2321.58	2533.82	2747.21	2617.36	2486.67	2784.63	2500.69	2089.7	3143.2	2451.39	2561.7	2672.07	2782.5	2892.98	3003.53	3114.13	3224.8	3335.52	3446.3	3557.14	3668.04	3778.99	4457.36	5136.08	5815.18	6494.63	7174.45	7854.63	8535.17	9216.07	9897.34
508	0	0	0	0	0	0.14945	0.418459	0.813753	1.68842	3.8594	10.3587	12.6045	15.3863	18.8475	23.1749	28.6139	35.4902	44.2398	55.4534	89.3682	131.593	219.595	332.296	478.408	670.639	928.042	1403.66	8233.78	9183.03	10175.7	11211.7	12291	13413.8	14579.9	15789.4	17042.2	18338.4	19678	21061	22487.3	23971.1	25641.7	27387.6	29204.9	29727.9	30202.1	30619.5	30971.1	31247
512	0	0	0	0	0	26.8382	42.6549	67.2145	105.244	163.984	254.514	264.142	274.125	284.477	295.211	306.342	317.882	329.849	342.256	343.283	344.304	345.318	346.327	347.33	348.328	349.319	411.608	474.235	481.395	488.559	495.726	502.897	510.072	517.251	524.433	531.62	538.81	546.004	553.202	560.403	576.107	593.214	610.829	628.968	647.645	665.907	701.147	738.251	777.319
516	0	0	0	0	0	0.197705	0.79082	2.19695	6.51193	21.2643	81.534	94.7196	110.39	129.102	151.557	178.656	211.559	251.778	301.311	362.824	439.934	537.625	662.888	825.741	1040.88	1330.5	1729.15	9078.68	10248	11507.1	12862.2	14320.2	15888.1	17573.7	19385.2	21331.3	23421.5	25665.7	28074.8	30660.2	33434.2	33733.5	33990.4	34199.9	34356.2	34453.1	34483.9	34441.3	34317.3
520	0	0	0	0	0	0	0	0	0	0	0	0	0	0	0	0	0	0	0	0	0	0	0	0	0	0	0	0	0	0	0	0	0	0	0	0	0	0	0	0	0	0	0	0	0	0	0	0	0
524	0	0	0	0	0	0.554538	1.38635	3.46586	8.66466	21.6617	54.1541	112.957	115.706	118.401	121.02	123.536	125.918	128.13	130.124	130.935	131.234	135.177	138.127	139.926	140.356	139.107	161.551	176.373	178.692	180.869	182.897	184.771	186.482	188.024	189.386	190.56	191.534	192.297	192.835	193.133	195.928	200.126	65.5751	85.2273	110.607	145.528	190.996	242.93	323.608
528	0	0	0	0	0	4.40591	8.87095	17.861	35.9617	72.4061	145.784	133.502	122.254	111.955	102.523	93.8852	85.9754	157.212	448.366	801.735	935.453	1428.69	1272.43	1658.79	1367.14	1703.84	1970.82	2481.83	2329.37	2170.7	2005.83	1834.75	1657.48	1609.32	1558.98	1506.47	1451.78	1394.92	1342.62	1288.33	1327.85	1366.11	1377.54	1390.24	1399.53	1445.53	1487.11	1527.19	1573.23
530	0	0	0	0	0	0	0	0	0	0	0	0	0	0	0	0	0	0	0	0	0	0	0	0	0	0	0	0	0	0	0	0	0	0	0	0	0	0	0	0	0	0	0	0	0	0	0	0	0
533	0	0	0	0	0	0	0	0	0	0	0	0	0	0	0	0	0	0	0	0	0	0	0	0	0	0	0.0233199	0.0464077	0.0499618	0.0537881	0.0579075	0.0623423	0.0671167	0.0722568	0.0777905	0.0837481	0.0901618	0.0970668	0.104501	0.107447	0.110476	0.11359	0.116793	0.132447	0.161547	0.262265	0.313874	0.402058	0.392556
540	0	0	0	0	0	0.268536	0.570438	1.2006	2.50981	5.21953	10.8104	12.0513	13.4341	14.9752	16.6926	18.6063	20.7388	23.1151	25.7628	28.7131	32.0003	35.6628	39.7435	44.29	49.3552	54.9984	61.2853	68.2891	71.9036	75.7095	79.7168	83.9362	88.3788	93.0566	97.982	103.168	108.629	114.378	120.432	127.158	134.26	141.759	149.676	158.036	163.531	169.218	175.102	181.19	187.49
548	0	0	0	0	0	0	0	0	0	0	0	0	0	0	0	0	0	0	0	0	0	0	0.0274135	0.041004	0.0613309	0.091732	0.137199	0.205197	0.215933	0.227231	0.23912	0.251632	0.264797	0.278651	0.293231	0.308572	0.324717	0.341706	0.359584	0.379448	0.400409	0.422528	0.445869	0.470499	0.486578	0.503207	0.520403	0.538187	0.556578
554	0	0	0	0	0	0	0	0	0	0	0	0	0	0	0	0	0	0	0	0	0	0	84.1894	105.549	105.859	424.669	745.317	1067.79	1002.62	992.971	983.419	973.958	964.589	955.309	946.118	937.016	928.001	919.072	910.229	1062.23	1239.62	1446.63	1688.21	1970.13	2299.14	2683.08	3578.44	4474.3	5370.66
558	0	0	0	0	0	0	0	0	0	0	0	0	0	0	0	0	0	0	0	0	0	0	0	0	0	0	145.869	96.5018	105.92	116.191	127.389	139.594	152.893	167.379	183.154	200.33	219.024	239.367	264.399	291.785	355.836	426.894	511.754	509.009	502.28	531.157	559.755	585.684	607.599
562	0	0	0	0	0	295.354	385.972	503.743	656.486	854.106	1109.05	1263.98	1440.53	1641.69	1870.9	2132.06	2429.61	2768.63	3154.86	3320.28	3484.59	3734.65	3983.06	4410.64	4711.04	5147.16	5986.07	6819.43	6942.49	6998.59	7057.71	7120.17	7186.32	7256.57	7331.4	7411.38	7497.18	7589.63	7689.7	7798.62	7917.9	8049.49	8195.88	8360.43	8547.65	8763.96	9018.78	9326.72	9712.16
566	0	0	0	0	0	389.039	517.486	681.964	886.707	1128.71	1382.47	1812.47	2374.08	3106.6	4060.58	5300.83	6909.98	8992.85	11681.4	13625.9	15412.1	15958.5	16386.8	17659.9	18677.6	19389.1	23005.2	27060.5	27098.3	27010.6	26922.3	26833.7	26745	26656.3	26568.1	26480.7	26394.6	26310.6	26229.5	26152.6	26081.4	26018.2	25965.8	25928.6	25912.6	25926.8	25985.5	26111.4	26344.6
570	0	0	0	0	0	0	0	0	0	0	0.000457871	0.000678813	0.00100594	0.00149003	0.00220599	0.00326422	0.00482729	0.00713433	0.0105367	0.0155497	0.0229287	0.033778	0.0497095	0.0730705	0.10727	0.15724	0.230096	0.33604	0.352739	0.370259	0.38864	0.407924	0.428153	0.449375	0.471636	0.494987	0.519481	0.545171	0.572116	0.602044	0.633519	0.66662	0.70143	0.738035	0.776527	0.817	0.842395	0.868551	0.895489
574	0	0	0	0	0	0	0	0	0	0	0	0	0	0	0	0	0	0	0	0	0	0	0	0	0	0	0	0	0	0	0	0	0	0	0	0	0	0	0	0	0	0	0	0	0	0	0	0	0
578	0	0	0	0	0	0.417538	0.396536	0.746072	1.73065	3.1423	27.4067	29.6288	31.7361	33.7213	35.5761	37.291	38.8548	40.2545	41.4745	42.4958	43.2953	56.3703	68.1589	76.5613	36.2776	68.0498	78.566	84.9301	86.8916	88.8551	90.8151	92.7653	94.6984	96.6061	98.4788	100.305	102.073	103.766	105.369	112.904	125.379	137.75	152.574	167.904	178.893	184.385	189.671	203.268	206.405
580	0	0	0	0	0	0	0	0	0	0	0	0	0	0	0	0	0	0	0	0	0	0	0	0	0	0	0	0	0	0	0	0	0	0	0	0	0	0	0	0	0	0	0	0	0	0	0	0	0
583	0	0	0	0	0	0	0	0	0	0	0	0	0	0	0	0	0	0	0	0	0	0	0	0	0	0	0	0	0	0	0	0	0	0	0	0	0	0	0	0	0	0	0	0	0	0	0	0	0
584	0	0	0	0	0	0	0	0	0	0	0	0	0	0	0	0	0	0	0	0	0	0	0	0	0	0	0	0	0	0	0	0	0	0	0	0	0	0	0	0	0	0	0	0	0	0	0	0	0
585	0	0	0	0	0	0	0	0	0	0	0.0348497	0.043634	0.054632	0.0684016	0.085641	0.107224	0.134246	0.168077	0.210431	0.263456	0.32984	0.412948	0.516993	0.647247	0.810313	1.01445	1.27001	1.58995	1.67388	1.76225	1.85528	1.95323	2.05634	2.1649	2.27918	2.39951	2.52618	2.65954	2.79994	2.95594	3.12063	3.2945	3.47805	3.67184	3.79902	3.93062	4.06677	4.20764	4.35339
586	0	0	0	0	0.287594	0.958645	3.19548	10.6516	35.5054	118.351	394.504	847.024	889.41	940.381	988.14	1032.46	1073.09	1161.11	1242.21	1354.74	1456.66	1464.43	1464.87	1406.02	1519.61	1530.99	1864.92	2116.87	2118.79	2141.48	2163.8	2185.69	2207.11	2227.98	2248.24	2267.81	2286.6	2304.52	2321.47	2337.34	2351.99	2365.3	2377.1	2387.22	2395.45	2401.59	2405.36	2406.49	2404.62
591	0	0	0	0	0	0	0	0	0	0	0	0	0	0	0	0	0	0	0	0	0	0	0	0	0	0	65.5437	43.3615	46.7584	50.3927	54.2801	58.4371	62.8813	67.6314	72.7074	78.1303	83.9227	90.1083	97.7852	112.569	129.478	148.807	170.892	184.415	194.66	198.268	213.296	227.826	265.252
598	0	0	0	0	0	33.0113	47.0232	66.3488	92.3328	125.706	164.385	169.238	174.067	178.842	183.527	188.077	192.439	196.55	200.328	203.674	206.465	208.54	209.69	209.635	207.981	204.152	197.236	185.626	183.861	182.019	180.094	178.081	175.973	173.763	171.442	169.002	166.432	163.719	160.85	157.808	154.573	151.121	147.423	143.444	138.952	134.087	128.772	122.904	116.33
600	0	0	0	0	0	0	0	0	0	0	0	0	0	0	0	0	0	0	0	0	0	0	0	0	0	0	953.818	955.73	1005.53	1055.52	1105.71	1156.1	1206.68	1257.46	1308.44	1359.62	1411	1462.58	1660.92	1860.04	2059.95	2260.66	2462.16	2565.78	2669.81	2774.24	2879.07	2984.32	3860.72
604	0	0	0	0	0	0	0	0	0	0	0	0	0	0	0	0	0	0	0	0	0	0	0	0	0	0	1389.66	2122.28	2150.6	2178.07	2204.69	2230.48	2255.45	2279.63	2303.01	2325.63	2347.49	2368.6	2415.48	2461.06	2946.27	3462.48	4066.06	4381.7	4620.19	5070.28	6162.02	6724.71	6730.1
608	0	0	0	0	0	16.7769	19.1183	21.5801	24.0247	26.166	27.3719	26.8989	26.4086	25.8994	25.3694	24.8162	24.2372	23.6292	22.9881	22.3092	21.5861	37.4601	51.9316	64.802	75.8008	84.5401	124.716	174.996	183.41	191.479	199.186	206.513	213.442	219.949	226.011	231.601	236.686	241.231	245.195	248.531	279.628	326.896	381.304	443.913	500.748	549.292	590.592	635.727	722.091
612	0	0	0	0	0	0	0	0	0	0	0	0	0	0	0	0	0	0	0	0	0	0	0	0	0	0	0	0	0	0	0	0	0	0	0	0	0	0	0	0	0	0	0	0	0	0	0	0	0
616	0	0	0	0	0	15.0291	23.7872	37.2927	86.4964	125.613	547.555	591.91	633.96	725.372	812.047	695.063	581.884	756.403	919.883	1004.34	1079.82	1249.34	1798.74	2670.23	2528.84	2708.1	3122.08	3366.21	3462.3	3578.96	3697.46	3817.57	3938.97	4061.26	4184	4306.63	4428.49	4548.78	4666.55	4780.64	4957.84	5234.01	5513.59	6142.49	6707.75	7608.4	8393.83	8661.33	8811.56
620	0	0	0	0	0	45.4076	64.6845	91.2753	127.035	172.984	226.292	247.108	242.622	237.965	233.117	205.253	178.213	173.767	169.082	205.151	238.261	287.22	330.92	438.789	299.36	410.286	604.274	560.124	719.681	733.783	739.381	744.579	749.33	754.622	759.322	763.362	766.664	769.14	768.984	768.044	791.071	815.003	814.745	850.912	893.119	935.73	990.191	1015.02	1048.92
624	0	0	0	0	0	1.96113	3.11759	4.91341	7.69432	11.9899	18.6107	21.3383	24.4648	28.0487	32.1566	36.865	42.2616	48.4468	55.5358	63.6603	72.9714	83.6422	95.8709	109.885	125.944	144.346	165.434	189.597	192.577	195.73	199.073	202.629	206.42	210.477	214.832	219.526	224.607	230.135	236.182	242.838	250.219	258.473	267.796	278.451	290.806	305.392	323.01	344.946	373.42
626	0	0	0	0	0	0.517888	0.625566	0.752673	0.901142	1.072	1.26424	1.57019	1.94993	2.42119	3.00594	3.73138	4.63121	5.74715	7.13083	8.84615	10.9721	13.6066	16.8702	20.9125	25.9177	32.1136	39.7812	49.2672	50.1323	51.0124	51.9079	52.8189	53.7458	54.6888	55.6482	56.6243	57.6173	58.6276	59.6554	64.7798	70.3442	76.3863	82.9472	90.0713	93.8947	97.8801	102.034	106.365	110.879
630	0	0	0	0	0	0	0	0	0	0	0	0	0	0	0	0	0	0	0	0	0	0	0	0	0	0	1.55737	2.29024	2.92574	3.73758	4.77469	6.09957	7.79208	9.95424	12.7163	16.2449	20.7525	26.511	33.8672	43.2647	51.2124	58.8318	72.4675	86.6506	101.874	116.801	130.867	146.127	176.548
634	0	0	0	0	0	0.21082	0.332394	0.520683	0.811567	1.25995	1.94978	2.023	2.09892	2.17762	2.25922	2.34383	2.43154	2.52247	2.61674	2.71447	2.81579	2.92082	3.02971	3.14258	3.2596	3.38089	3.50663	8.84361	9.28819	9.75512	10.2455	10.7606	11.3015	11.8696	12.4663	13.093	13.7512	14.4424	15.1684	15.9504	16.7727	17.6373	18.5465	19.5026	19.7046	19.9087	20.115	20.3233	20.5338
638	0	0	0	0	0	0.0111702	0.0159112	0.0224499	0.0312406	0.0425296	0.055608	0.0683079	0.0838275	0.102763	0.125822	0.153846	0.187816	0.228875	0.278324	0.337618	0.408328	0.492059	0.590284	0.704021	0.833223	0.97559	1.1241	1.26127	1.49396	1.76865	2.09265	2.47445	2.92393	3.45247	4.07319	4.80113	6.04683	7.23593	8.2948	9.24662	9.88989	11.2471	11.4737	16.7094	17.9864	17.1242	15.1464	14.8791	14.1142
642	0	0	0	0	0	23.6888	39.7463	66.6884	201.408	337.933	544.321	523.385	503.255	423.412	348.966	307.582	268.865	567.844	1042.37	1672.94	2028.01	2903.75	2554.22	2823.09	2714.51	3136.76	2554.22	3102.29	3427.75	3368.3	3282.86	3168.03	3020.05	3095.02	3165.29	3229.81	3287.39	3336.73	3436.82	3534.2	3755.75	3815.93	3868.96	3954.93	4013.56	4047.96	4054.69	4044.76	4088.11
643	0	0	0	0	0	47.0458	109.775	256.148	597.703	1394.74	3254.77	7324.86	7993.66	8629.96	9234.6	9060.68	8902.81	9498.39	10138.9	10542.3	10880.9	15735.6	22654	22372.6	21185.9	25572.3	29475.1	30002.9	33550.5	36982.8	40294.6	43480.4	46534.1	49448.6	52216.4	54828.8	57276.1	59547.3	61629.5	64302.3	67116	77458.8	81629.3	90921.9	95312.4	105651	116357	124439	146188
646	0	0	0	0	0	0.974494	1.24622	1.58422	1.99786	2.49141	3.05486	4.40069	6.33759	9.12421	13.1318	18.8931	27.1719	39.063	56.1339	69.2898	82.0673	98.4983	114.404	129.759	144.538	158.711	171.62	183.876	185.751	187.513	189.385	191.376	193.5	195.774	198.214	200.844	203.689	206.78	210.156	213.865	217.967	222.537	227.678	233.522	240.253	248.135	257.557	269.134	283.902
654	0	0	0	0	0	0.000452602	0.000719033	0.00113269	0.00177313	0.00276227	0.00428661	0.00537551	0.00674082	0.00845264	0.0105989	0.0132897	0.0166631	0.0208923	0.0261941	0.0328405	0.0411722	0.0516164	0.0647083	0.0811188	0.101689	0.127471	0.159787	0.200291	0.250433	0.313128	0.391519	0.489534	0.612086	0.765319	0.956913	1.19647	1.496	1.87051	2.33879	2.92429	3.65636	4.57171	5.7162	7.1472	7.94351	8.82854	9.53048	10.2328	8.58987
659	0	0	0	0	0	0	0	0	0	0	0	0	0	0	0	0	0	0	0	0	0	0	0	0	0	0	0.787514	1.54415	1.63796	1.73747	1.84302	1.95499	2.07376	2.19974	2.33338	2.47514	2.62551	2.78501	2.95421	2.99283	3.03195	3.07158	3.24449	3.17135	3.66938	3.74298	3.92176	3.84486	3.85314
660	0	0	0	0	0	0	0	0	0	0	0	0	0	0	0	0	0	0	0	0	0	0	0	0	0	0	0	0	0	0	0	0	0	0	0	0	0	0	0	0	0	0	0	0	0	0	0	0	0
662	0	0	0	0	0	0	0	0	0	0	0	0	0	0	0	0	0	0	0	0	0	0	0	0	0	0	0.0798036	0.0853514	0.0905367	0.096037	0.101871	0.10806	0.114625	0.121589	0.128976	0.136811	0.145123	0.153939	0.163292	0.165426	0.167589	0.169779	0.171999	0.174247	0.176721	0.17923	0.181775	0.184356	0.186974
666	0	0	0	0	0	0	0	0	0	0	0	0	0	0	0	0	0	0	0	0	0	0	0	0	0	0	0	0	0	0	0	0	0	0	0	0	0	0	0	0	0	0	0	0	0	0	0	0	0
670	0	0	0	0	0	0	0	0	0	0	0	0	0	0	0	0	0	0	0	0	0	0	0	0	0	0	0.211058	0.41384	0.438982	0.465651	0.49394	0.523948	0.555779	0.589544	0.62536	0.663352	0.703652	0.7464	0.791746	0.802095	0.81258	0.823202	0.833963	0.844864	0.85686	0.869027	0.881366	0.89388	0.906572
674	0	0	0	0	0	0.0517116	0.104117	0.209632	0.422079	0.849823	1.71105	1.67882	1.64719	1.61616	1.58572	1.55584	1.52653	2.99076	5.13524	7.20852	7.80222	10.1328	8.18547	6.15449	7.24626	5.34022	4.43721	4.39944	4.27665	4.12874	3.95342	3.7482	3.51043	3.53446	3.55129	3.5601	3.56001	3.55004	3.52861	3.4951	3.44828	3.38686	3.30941	3.21444	3.10029	2.96523	2.80737	2.62467	2.41496
678	0	0	0	0	0	0	0	0	0	0	0	0	0	0	0	0	0	0	0	0	0	0	0	0	0	0	0	0	0	0	0	0	0	0	0	0	0	0	0	0	0	0	0	0	0	0	0	0	0
682	0	0	0	0	0	0.709799	1.33087	2.49539	4.67885	8.77285	16.4491	23.9543	34.884	50.8005	73.9793	107.734	156.89	192.19	235.334	269.654	306.425	397.076	513.9	664.32	729.405	935.135	1315.03	1461.15	1833.36	2300.36	2886.27	3621.36	4543.61	5700.64	7152.22	8973.3	11257.9	14124	17719.5	22230	28657.8	36553.4	46624.2	47595.8	48587.6	50142.4	51893.2	53705.2	55580.4
686	0	0	0	0	0	62.7989	79.5158	99.7304	123.369	149.304	173.561	213.206	261.656	320.772	392.771	480.274	586.358	714.591	869.05	1054.29	1275.25	1536.97	1844.11	2199.95	2604.5	3050.9	3517.8	3951.93	3956.95	3962.28	3967.97	3974.05	3980.59	3987.63	3995.25	4003.54	4012.61	4022.6	4033.68	4046.06	4060.02	4075.95	4094.36	4115.95	4141.77	4173.35	4213.14	4391.32	5191.08
690	0	0	0	0	0	0	0	0	0	0	0	0	0	0	0	0	0	0	0	0	0	0	0	0	0	0	0	0	0	0	0	0	0	0	0	0	0	0	0	0	0	0	0	0	0	0	0	0	0
694	0	0	0	0	0	0.239145	0.333676	0.463042	0.639817	0.881032	1.20974	1.34793	1.50186	1.67334	1.86435	2.07713	2.31413	2.57812	2.87217	3.19968	3.56447	3.97077	4.4233	4.9273	5.48862	6.11376	6.80999	7.58536	8.43025	9.36925	10.4128	11.5727	12.8617	14.2942	15.8864	17.6558	19.6224	21.808	24.237	26.9366	29.9368	33.2713	36.9771	41.0956	63.942	99.4896	154.799	240.857	374.757
702	0	0	0	0	0	0	0	0	0	0	0	0	0	0	0	0	0	0	0	0	0	0	0	0	0	0	0	0	0	0	0	0	0	0	0	0	0	0	0	0	0	0	0	0	0	0	0	0	0
703	0	0	0	0	0	14.2128	23.8469	40.0116	67.1335	112.64	188.994	181.906	175.085	168.52	162.2	156.118	150.264	288.795	486.44	752.823	887.256	1355.08	1430.36	1580.93	1520.12	1317.44	1609.16	1416.57	1361.57	1299.73	1230.57	1153.59	1068.29	1063.53	1056.6	1047.33	1035.55	1021.06	1019.85	1036.18	1050.74	1063.26	1073.43	1080.94	1064.32	1044.65	1021.7	995.24	961.414
704	0	0	0	0	0	15.3635	19.556	24.6749	30.7338	37.4951	44.0244	46.5837	49.2466	52.0083	54.8618	57.7969	60.7993	63.8495	66.9211	68.6281	69.9915	87.8648	104.001	118.16	130.014	139.107	161.551	176.373	191.628	206.446	220.808	234.699	248.097	260.981	273.329	285.113	296.307	306.877	316.788	326.002	358.872	389.999	419.266	446.538	471.656	555.843	634.1	705.856	770.41
705	0	0	0	0	0	8.70221	13.9139	22.2469	35.5704	56.8734	90.9345	90.6755	90.4171	90.1595	89.9027	89.6465	89.3911	177.988	310.591	443.093	487.402	643.305	528.146	403.573	482.908	361.684	305.422	307.758	295.81	282.374	267.348	250.625	232.092	231.058	229.552	227.539	224.979	221.831	224.14	230.571	236.958	243.272	249.482	255.55	273.147	291.562	310.765	330.714	351.344
706	0	0	0	0	0	578.559	839.294	1213	1744.92	2495.04	3539.03	3772.23	4020.34	4284.25	4564.92	4863.34	5180.58	5517.73	5875.97	6157.87	6434.4	7663.33	8871.92	10059.7	11226	12370.5	13032.5	13679.4	13829	13978.2	14127.2	14275.9	14424.2	14572.2	14719.9	14867.3	15014.4	15161.2	15307.7	15453.8	16345.3	17010.7	17703.2	18423.9	19375.7	20376.6	21429.1	22536	23700
710	0	0	0	0	0	0	0.132792	0.368903	1.09346	3.57062	13.6909	16.4534	19.8368	23.9991	29.1449	35.5408	43.5375	53.6011	66.358	81.8339	100.781	137.6	184.286	244.26	322.5	426.446	602	4203.91	4452.56	4688.58	4911.97	5122.72	5320.83	5506.31	5679.16	5839.37	5986.95	6121.89	6244.2	6353.87	6450.91	6054.92	6851.28	8106.61	10301.2	19493.9	22832.4	30317.2	38619.4
716	0	0	0	0	0	0	0	0	0.520486	1.04097	2.99356	3.70039	4.58877	5.71025	7.13276	8.94657	11.2727	14.2749	18.1771	23.9585	31.0885	35.3717	40.6053	47.0926	55.2684	131.548	172.703	910.353	999.57	1093.73	1192.11	1295.16	1403.38	1517.39	1637.89	1765.71	1901.89	2047.65	2204.5	2374.34	2559.57	2560.16	2566	2578.68	2600.48	2634.76	2686.76	2765.14	2885.35
724	0	0	0	0	0	95.2018	190.404	380.807	761.614	1523.23	3240.99	3349.07	3453.03	3245.11	3039.39	2669.14	2305.57	2355.2	2400.6	2441.25	2476.56	2733.58	3271.44	4357.31	3111.26	3565.47	4495.87	4047.1	4543.97	4646.05	4749.77	4855.1	4962.01	5070.44	5180.35	5291.68	5404.35	5518.27	5633.36	5749.48	6099.93	6044.53	6548.34	7157.8	7478.2	7808.27	8094.35	8192.69	8689.97
732	0	0	0	0	0	0	0	0	3.17235e-05	6.34469e-05	0.000118963	0.000223056	0.000418229	0.00078418	0.00147034	0.00275688	0.00516915	0.00969216	0.0181728	0.034074	0.0638888	0.119791	0.224609	0.421142	0.789641	1.48058	2.77608	5.20515	6.5282	8.18754	10.2687	12.8788	16.1523	20.2579	25.407	31.865	39.9645	50.1227	62.8629	79.2389	99.881	125.9	158.698	157.704	158.398	158.88	159.106	159.022	158.557
736	0	0	0	0	0	506.525	1013.05	2026.1	4052.2	8104.41	27117.4	56042.7	56885.6	57682.9	58425.1	59101.2	59698.5	60201.5	60591.7	63413.7	65851.4	65738.2	65295.8	67723.6	69369.9	70068.7	70112.7	68448.7	68289.3	68032.2	67772	67508.7	67242.7	66974.4	66704.1	66432.7	66161	65890.2	65622.1	65358.8	65103.5	64860.5	64635.8	64438.1	64280.2	64181.5	64172.2	64302.7	64661.8
740	0	0	0	0	0	0	0	0	0	0	0	0	0	0	0	0	0	0	0	0	0	0	0	0	0	0	0.233048	0.336386	0.375928	0.41988	0.468716	0.522962	0.583197	0.650061	0.724264	0.806584	0.897887	0.999124	1.12367	1.24006	1.36735	1.50649	1.65853	1.6648	1.72512	1.77829	1.82198	1.85343	1.86937
744	0	0	0	0	0	0	0	0	0	0	0	0	0	0	0	0	0	0	0	0	0	0	0	0	0	0	0	0	0	0	0	0	0	0	0	0	0	0	0	0	0	0	0	0	0	0	0	0	0
748	0	0	0	0	0	0	0.0173864	0.0362253	0.0805311	0.197227	0.567172	0.615505	0.670099	0.732076	0.802817	0.884043	0.977917	1.08719	1.21539	1.49885	1.84588	2.52024	3.37532	4.4738	5.90682	7.81066	11.0261	76.9976	96.7867	112.764	130.768	151.032	173.812	199.393	228.091	260.256	296.273	336.571	381.625	431.957	488.149	510.349	532.791	555.351	577.882	600.208	622.124	643.391	663.731
752	0	0	0	0	0	0.418052	0.794439	1.49575	3.47325	15.7929	55.2871	59.8022	64.0942	68.1494	71.9525	75.4857	78.7285	81.657	84.2429	86.4523	88.2437	100.229	110.888	216.464	81.2637	89.8655	126.543	207.042	213.117	215.234	237.532	249.391	254.123	271.335	284.915	290.572	298.209	316.082	317.212	335.626	369.118	394.157	429.319	465.407	496.878	534.293	546.137	570.767	597.73
756	0	0	0	0	0	1.30555	3.28578	6.61567	13.3201	40.2286	202.493	194.9	187.591	180.557	173.786	167.269	160.997	309.423	521.185	716.974	760.505	1290.55	1277.11	1505.65	1302.96	1254.71	1277.11	1551.46	1473.57	1389.98	1300.43	1204.65	1102.36	1084.45	1064.62	1042.79	1018.84	992.689	991.977	1073.67	1129.5	1180.84	1230.46	1248.63	1282.36	1312.07	1308.39	1423.27	1547.39
760	0	0	0	108.217	177.554	285.81	454.416	716.248	1121.72	1748.06	2713.47	3694.52	5030.1	6848.29	5438.65	4319.05	3429.83	2723.6	2162.74	3953.89	1919.75	2032.7	2146.24	2260.37	1812.77	1947.8	2279.79	2299.07	2313.05	2327.03	2341.03	2355.03	2369.04	2383.05	2397.07	2411.1	2425.14	2439.18	2453.23	2467.29	2571.95	2655.65	2742.07	2831.3	2923.44	3301.33	3679.42	3614.43	3549.4
762	0	0	0	0	0	11.1971	26.1265	60.9619	142.244	331.904	774.442	1659.52	1745.65	1834.27	1925.07	2017.59	2111.27	2205.32	2298.73	2342.37	2374.37	2393.16	2496.57	2572.85	2616.73	2620.49	2727.82	2729.47	2890.42	3010.17	3133.1	3259.04	3387.76	3518.96	3652.26	3787.2	3923.18	4059.49	4195.23	4329.27	4460.24	4586.43	4705.68	4815.27	4911.72	4990.47	5045.51	5068.54	5047.78
764	0	0	0	0	0	4.21984	11.0238	16.9762	21.8897	25.4603	55.6192	60.1466	64.4456	68.5021	72.3	75.8208	79.043	81.9413	84.486	86.641	88.3623	102.394	114.887	125.619	134.296	140.495	146.847	148.444	147.967	148.984	149.947	150.849	151.685	152.447	153.127	153.718	154.209	154.59	162.169	169.306	175.974	182.141	187.772	211.188	233.112	253.421	271.967	288.573	331.13
768	0	0	0	0	0	8.38762	11.5588	15.8817	21.7672	29.7709	40.6442	46.5562	53.3275	61.0826	69.9644	80.1366	91.7863	105.128	120.408	137.906	157.945	180.893	207.173	237.267	271.729	311.193	356.384	408.132	409.581	411.034	412.493	413.957	415.426	416.901	418.38	419.865	421.355	422.85	424.35	428.003	431.687	435.403	439.151	442.931	452.062	461.381	470.892	480.599	490.507
772	0	0	0	0	0	0	0	0	0	0	0	0	0	0	0	0	0	0	0	0	0	0	0	0	0	0	0	0	0	0	0	0	0	0	0	0	0	0	0	0	0	0	0	0	0	0	0	0	0
776	0	0	0	0	0	0	0	0	0	0.331793	0.30442	0.314898	0.325422	0.335936	0.34637	0.356638	0.366636	0.376234	0.385271	0.393546	0.400803	0.406714	0.410844	0.587968	0.834971	1.17301	1.62157	2.18254	2.26761	2.35474	2.4438	2.53463	2.62704	2.72076	2.81548	2.91081	3.00629	3.10132	3.1952	3.29619	3.3946	3.48907	3.5779	3.6589	3.65485	3.63581	3.59808	3.53657	3.44394
780	0	0	0	0	0	0	0	0	0	0	0	0	0	0	0	0	0	0	0	0	0	0	0	0	0	0	0.00234083	0.00458987	0.00674981	0.00992619	0.0145973	0.0214667	0.0315686	0.0464245	0.0682713	0.100399	0.147646	0.217126	0.319303	0.469563	0.484984	0.534908	0.589972	0.737466	0.878948	1.19194	1.46072	1.79009	2.16755
784	0	0	0	0	0	5.18586	8.25376	13.0194	20.4014	31.8073	49.3913	51.2619	53.2016	55.213	57.2987	59.4614	61.7039	64.0292	66.4402	66.642	66.8426	67.0421	67.2403	67.4374	67.6334	67.8282	92.1587	116.625	106.82	103.882	101.024	98.2457	95.5435	92.9155	90.3599	87.8744	85.4574	83.1068	80.8208	84.9892	89.3725	93.9818	98.8289	103.926	109.426	115.217	121.315	127.735	134.496
788	0	0	0	0	0	50.8361	88.8751	154.448	267.151	460.379	790.955	892.399	994.399	947.366	900.036	852.412	804.495	806.708	960.579	988.525	1016.59	968.335	1021.99	1024.67	821.868	823.989	1032.62	828.197	828.911	841.711	855.273	869.681	885.03	901.433	919.025	937.963	958.439	980.683	1004.98	1031.69	1061.25	1094.26	1131.46	1173.88	1222.96	1280.74	1350.31	1436.6	1548.11
792	0	0	0	0	94.3309	293.873	486.513	671.876	1318.25	1937.6	2528.14	2732.68	2936.24	2720.32	2505.32	2291.25	2078.12	2280.6	2482.07	2734.13	2984.93	2176.84	2560.81	2942.87	2364.82	2541.99	3245.64	3439.83	3479.14	3528.67	3578.9	3629.85	3681.53	3733.93	3787.09	3841	3895.68	3951.13	4007.37	4064.42	4216.92	4361.22	4510.45	4664.8	4824.42	4928.93	5028.23	5129.53	5232.87
795	0	0	0	0	8.229	19.201	44.8023	104.539	243.924	569.155	1328.03	2845.78	3006	3173.24	3347.47	3528.57	3716.35	3910.5	4110.52	4153.91	4188.4	4381.76	4556.28	4710.22	4885.9	5162.6	5814.08	6187.73	6575.59	6911.3	7263.75	7633.73	8022.09	8429.7	8857.47	9306.37	9777.37	10271.5	10789.9	11333.6	11903.9	12501.9	13129	13786.4	14475.5	15197.7	15954.6	16747.7	17578.5
796	0	0	0	0	0	0	0	0	0	0	0	0	0	0	0	0	0	0	0	0	0	0	0	0	0	0	0	0	0	0	0	0	0	0	0	0	0	0	0	0	0	0	0	0	0	0	0	0	0
798	0	0	0	0	0	0	0	0	0	0	0	0	0	0	0	0	0	0	0	0	0	0	0	0	0	0	0	0	0	0	0	0	0	0	0	0	0	0	0	0	0	0	0	0	0	0	0	0	0
800	0	0	0	0	0	22.2929	28.1882	35.5924	44.8934	56.5782	71.2592	89.2659	111.821	140.074	175.462	219.788	275.309	344.85	431.95	504.974	578.288	680.863	783.842	887.221	990.999	1095.17	1280.21	1465.95	1480.37	1495.3	1511.03	1527.64	1545.22	1563.9	1583.79	1605.05	1627.87	1652.45	1679.08	1708.07	1739.85	1774.95	1814.05	1858.06	1908.24	1966.37	2035.07	2118.44	2223.34
804	0	0	0	0	0	1.80597	4.21394	9.83252	22.9425	53.5326	124.909	267.663	281.67	296.105	310.923	326.058	341.426	356.912	372.367	387.595	400.551	580.171	836.893	800.635	760.756	954.921	1108.77	1344.54	1484.88	1549.38	1616.01	1684.76	1755.59	1828.44	1903.25	1979.92	2058.29	2138.21	2219.44	2335.41	2461.1	2626.61	2695.66	3009.81	3305.01	3795.08	4342.72	5129.65	6117.01
807	0	0	0	0	0	6.14013	10.3022	17.2856	29.0027	48.6623	81.6481	79.6635	77.7964	75.973	74.1924	72.4535	70.7554	137.973	235.794	329.441	354.902	477.505	398.459	308.657	373.516	282.309	280.964	273.002	254.612	241.568	227.322	211.806	194.95	192.9	190.477	187.658	184.417	180.73	189.585	209.682	231.865	256.349	283.369	313.183	356.89	406.63	463.23	527.625	600.881
818	0	0	0	0	0	0	0	0	0	0	0	0	0	0	0	0	0	0	0	0	0	0	0	0	0	0	0	0	0	0	0	0	0	0	0	0	0	0	0	0	0	0	0	0	0	0	0	0	0
826	0	0	0	0	0	3.94813	3.97463	18.0059	54.3801	143.283	530.713	553.256	562.55	572	581.61	419.43	268.865	516.222	1268.22	2903.75	4309.53	8258.3	11568.7	11899.2	6297.66	6587.2	6385.55	8380.33	8297.31	8128.4	7872.59	7528.69	7095.21	7173.59	7224.98	7249.26	7246.22	7215.56	6961.92	8471.39	9327.15	10771.4	10801.7	11276.9	11986	12850.9	13476.1	14155.8	14657.7
834	0	0	0	0	0	141.131	189.968	257.977	353.522	488.915	682.394	811.489	965.027	1147.64	1364.85	1623.2	1930.51	2296.06	2730.91	3186.06	3641.21	5803.18	7965.15	10127.1	12289.1	7965.15	9671.96	11378.8	11532.1	11665.2	11805.9	11850.7	11898	11948.2	12001.6	12058.6	12119.7	12185.4	12256.7	12334.3	12419.4	12513.5	12618.6	12737.3	12873.5	13032.5	13222.6	13457.1	13759.2
840	0	0	0	0	0	0	0	0	0	0	0	0	0	0	0	0	0	0	0	0	0	0	0	0	0	0	0	0	0	0	0	0	0	0	0	0	0	0	0	0	0	0	0	0	0	0	0	0	0
850	0	0	0	0	0	0	0	0	0	0	0	0	0	0	0	0	0	0	0	0	0	0	0	0	0	0	2.0626	4.04431	4.46064	4.91982	5.42627	5.98486	6.60095	7.28046	8.02991	8.85652	9.76822	10.7738	11.8828	11.6732	11.4672	11.2649	11.0662	10.8709	10.1503	9.47737	8.84908	8.26245	7.71471
854	0	0	0	0	0	222.2	316.567	446.775	621.964	847.274	1109.29	1235.71	1375.25	1528.94	1697.82	1882.83	2084.85	2304.52	2542.17	2797.67	3070.08	3357.4	3655.91	3959.28	4257.11	4532.25	4755.7	4875.08	4833.41	4818.18	4802.64	4786.79	4770.63	4754.16	4737.38	4720.32	4702.99	4685.44	4667.72	4649.93	4632.18	4614.68	4597.71	4581.71	4567.36	4555.74	4548.64	4549.18	4563.16
858	0	0	0	0	0	0	0	0	0	0	0	0	0	0	0	0	0	0	0	0	0	0	0	0	0	0	41.3245	60.8574	65.6249	70.7257	76.1816	82.0159	88.2533	94.92	102.044	109.655	117.785	126.466	137.241	148.799	206.731	283.444	388.329	654.586	881.651	1106.49	1508.47	1842.07	1905.46
860	0	0	0	0	8.11105	18.9258	44.1602	103.04	240.427	560.997	1308.99	2804.99	2954.04	3108.1	3266.78	3429.53	3595.61	3764.04	3933.51	3990.29	4031.66	4207.61	4353.36	4464.65	4535.86	4595.76	4935	5141.95	5427.2	5677.53	5937.94	6208.66	6489.93	6781.93	7084.86	7398.85	7724.02	8060.42	8408.05	8766.85	9136.67	9517.26	9908.26	10309.2	10719.3	11137.9	11563.7	11995.5	12431.4
862	0	0	0	0	0	0	0	0	0	0	0	0	0	0	0	0	0	0	0	0	0	0	0	0	0	0	588.226	973.486	1009.88	1047.05	1084.99	1123.73	1163.27	1203.63	1244.83	1286.88	1329.79	1373.58	1434	1812.72	2289.52	2889.41	3643.72	4189.5	4395.56	4587.68	4805.11	4500.6	4136.87
876	0	0	0	0	0	0	0	0	0	0	0	0	0	0	0	0	0	0	0	0	0	0	0	0	0	0	0	0	0	0	0	0	0	0	0	0	0	0	0	0	0	0	0	0	0	0	0	0	0
882	0	0	0	0	0	0	0	0	0	0	0.0023346	0.0034413	0.00506773	0.00745482	0.010953	0.0160707	0.0235427	0.0344264	0.0502358	0.0731231	0.106121	0.153451	0.220886	0.31611	0.448897	0.630617	0.871722	1.1732	1.21891	1.26572	1.31358	1.36238	1.41203	1.46238	1.51326	1.56447	1.61574	1.66677	1.71717	1.77138	1.82419	1.87487	1.92249	1.96588	2.13534	2.30985	2.48556	2.65635	1.84547
887	0	0	0	0	0	0.0621222	0.248489	0.993956	3.97582	15.9033	63.6132	148.083	344.718	802.458	1868.02	4348.5	10122.7	10357.1	10592.5	9909.46	9221.97	8221.71	8658.27	9097.1	8501.43	9357.66	10427	9410.85	9446.67	9568.94	9692.78	9818.22	9945.29	10074	10204.4	10336.4	10470.2	10605.7	10742.9	10881.9	10996.3	11223.8	11456.1	11693.1	11935.1	12400.8	12866.7	13332.9	13799.4
891	0	0	0	0	0	13.5717	27.3256	55.0179	110.774	223.035	449.065	428.779	412.701	397.225	382.329	367.992	354.193	680.731	1146.61	1708.79	1951.96	2719.84	6273.17	1863.24	1672.14	1552.7	1545.3	1501.51	1442.45	1374.14	1296.58	1209.76	1113.7	1100.96	1084.97	1065.73	1043.25	1017.52	1023.64	1028.47	1032.01	1034.27	1263.28	1479.69	1683.51	1874.73	2053.35	2219.37	2372.8
894	0	0	0	0	0	91.066	132.439	191.517	274.679	388.843	537.452	607.893	687.177	776.31	876.381	988.557	1114.07	1254.19	1410.21	1628.82	1836.14	2156.38	2455.73	2730.47	2975.43	3182.98	3295.48	3342.39	3363.88	3402.27	3442.93	3486.11	3532.11	3581.27	3634	3690.79	3752.22	3819.03	3892.11	3972.57	4061.86	4161.83	4274.98	4404.68	4555.74	4735.15	4953.69	5229.01	5592.46
[truncated: 29 more columns]

## Sheet: lower
ISO1	y-10000	y-9000	y-8000	y-7000	y-6000	y-5000	y-4000	y-3000	y-2000	y-1000	y0	y100	y200	y300	y400	y500	y600	y700	y800	y900	y1000	y1100	y1200	y1300	y1400	y1500	y1600	y1700	y1710	y1720	y1730	y1740	y1750	y1760	y1770	y1780	y1790	y1800	y1810	y1820	y1830	y1840	y1850	y1860	y1870	y1880	y1890	y1900	y1910
4	0	0	0	0	0.00790221	0.0273538	0.268067	1.0978	3.58882	10.5039	46.6838	117.396	288.341	631.605	1373.05	2965.8	3195.52	3323.76	3439.37	3581.14	3714.71	4145.47	4601.1	3387.86	3809.81	4256.73	5563.3	5806.89	6031.07	6251.08	6478.01	6712.07	6953.48	7202.44	7459.17	7723.91	7996.88	8278.32	8568.48	8867.61	9269.71	9898.66	10568.9	11283.2	12044.3	13046.5	14289.7	15649.6	17029.8
8	0	0	0	0	0	0	0.876411	2.04496	4.67419	10.5169	19.6065	23.0896	26.8901	31.0322	35.5415	40.4455	45.7736	94.0404	168.619	246.021	275.869	370.085	308.009	238.025	287.418	216.806	184.054	279.206	271.224	261.264	249.261	235.151	218.868	218.742	217.921	216.382	214.103	211.061	216.411	221.664	224.828	237.702	251.229	276.044	300.561	329.717	358.476	392.948	424.224
12	0	0	0	0	0	0	72.7798	169.82	388.159	873.358	1674.93	1840.47	1999.89	2153.34	2300.96	2442.9	2579.28	2710.23	2835.91	3283.21	3763.65	3879.56	3985.8	3718.17	3404.57	3639.01	5707.18	4633.3	4906.41	5185.2	5469.67	5759.84	6055.7	6357.26	6664.52	6977.49	7296.18	7620.58	7950.71	8286.56	9838.57	11424.5	13044.4	14698.3	16386.2	18108.1	19864.2	21654.3	23331.8
16	0	0	0	0	0	0	0	0	0	0	0	0	0	0	0	0	0	0	0	0	0	0	0	0	0	0	0	0	0	0	0	0	0	0	0	0	0	0	0	0	0	0	0	0	0	0	0	0	0
20	0	0	0	0	0	0	0.0190295	0.0444022	0.101491	0.228354	0.537363	0.614829	0.695646	0.779923	0.867772	0.959309	1.05465	1.15392	1.25725	1.36476	1.47658	1.59286	1.71373	1.83934	1.96983	2.10536	2.24609	2.39218	2.55237	2.72282	2.90416	3.09706	3.30225	3.52048	3.75256	3.99935	4.26174	4.54071	4.83726	5.15249	5.48753	5.8436	6.22199	6.62406	7.05126	7.50513	7.98728	8.49944	8.98692
24	0	0	0	0	0	0	0	0	0.611517	1.37591	4.8849	7.87346	12.5901	20.019	31.7105	50.1155	79.1269	124.962	197.621	305.476	448.689	627.787	865.865	1184.83	1697.74	2411.71	3232.5	17413.7	9047.6	9979.28	10959.9	11993.1	13083.4	14235.7	15455.9	16750.8	18128.6	19599	21173.9	22867.9	24699.1	24728.6	24781.6	24868.3	25003.2	25207.5	25514	25976	26519.9
28	0	0	0	0	0	0	0	0	0	0	0	0	0	0	0	0	0	0	0	0	0	0	0	0	0	0	0.865281	0.884725	0.983143	1.09176	1.21151	1.34337	1.48836	1.64755	1.82205	2.01297	2.22141	2.44842	2.69494	2.96176	3.24938	3.55793	3.64584	3.44785	3.24963	3.12164	3.17593	3.02538	2.83098
31	0	0	0	0	0	0	0	0	11.0852	24.9418	64.6639	154.867	180.052	207.211	236.378	267.557	300.718	335.776	372.577	405.297	436.881	665.935	895.869	1120.68	888.416	1086.58	1253.28	1366.48	890.543	964.358	1043.52	1128.3	1218.95	1315.69	1418.75	1528.26	1644.34	1766.99	1896.12	2031.48	2172.63	2318.85	2469.06	2621.7	2774.54	2924.4	3066.73	3194.95	3278.65
32	0	0	0	0	0	0	0	0	0	0	0	0	0	0	0	0	0	0	0	0	0	0	0	0	0	0	198.302	229.696	259.045	292.108	329.349	371.295	418.535	471.735	531.643	599.101	675.055	760.572	1191.03	1714.39	2467.53	3551.28	5110.69	7354.4	11042.7	16339.1	22823.5	37676.6	51535.1
36	0	0	0	0	0	0	0	0	0	0	0	0	0	0	0	0	0	0	0	0	0	0	0	0	0	0	0	0	0	0	0	0	0	0	0	0	2306.65	4669.75	6386.59	7712.02	8722.61	9548.18	11225.5	16807.2	27145.6	39527.2	61508.7	89388.1	122253
40	0	0	0	0	0	0	0.635728	1.48337	3.39055	7.62874	42.3819	52.1048	62.8249	63.0742	62.3263	60.5811	57.8388	69.5561	82.2707	104.708	129.14	175.012	255.538	428.805	280.468	468.694	513.07	1100.38	1155.5	1213.16	1273.49	1336.6	1402.61	1471.65	1543.85	1619.36	1698.31	1780.86	1867.16	1957.38	2051.68	2150.26	2253.28	2285.17	2317.24	2349.47	2381.88	2414.47	2431.93
44	0	0	0	0	0	0	0	0	0	0	0	0	0	0	0	0	0	0	0	0	0	0	0	0	0	0	0.372437	0.634318	0.729319	0.837531	0.960697	1.10078	1.26	1.44085	1.64613	1.87901	2.14303	2.4422	2.78101	2.97803	3.18678	3.08396	2.96502	2.8288	2.95753	3.05759	3.11705	3.121	3.03187
48	0	0	0	0	0	0	0	0	0.093289	0.2099	0.304946	0.372144	0.448684	0.535484	0.633477	0.743587	0.86669	1.00356	1.15477	1.32062	1.50088	1.69461	1.89971	2.11229	2.32559	2.52807	2.6996	2.80265	2.94353	3.08933	3.23995	3.39524	3.55499	3.7189	3.88658	4.05753	4.2311	4.40647	4.58261	4.76403	4.94374	5.11968	5.28923	5.44906	5.60204	5.73568	5.84228	5.91127	5.89037
50	0	0	0	0	0	0	0.0267276	0.103941	0.659942	1.48487	5.49952	13.1969	15.5851	18.3825	21.4081	24.6622	28.1446	33.3301	38.9343	46.2892	54.2149	59.3719	64.7573	67.9162	80.4946	89.4385	121.218	155.28	161.535	167	172.621	178.403	184.348	190.461	196.748	203.211	209.857	216.689	223.712	234.118	244.974	256.302	250.177	266.271	283.365	301.521	320.803	341.28	360.755
51	0	0	0	0	0	0	0	0	0.382816	0.861336	2.23309	5.34816	6.31266	7.38328	8.56989	9.88322	11.3349	12.9375	14.7047	16.4378	18.26	28.7671	40.177	52.5989	43.7727	57.0646	70.9581	87.0186	92.784	98.9143	105.432	112.36	119.724	127.551	135.869	144.708	154.1	164.077	174.677	185.935	197.894	210.594	224.08	238.401	253.606	269.749	286.887	305.078	322.36
52	0	0	0	0	0	0	0	0	0	0	0	0	0	0	0	0	0	0	0	0	0	0	0	0	0	0	0.213293	0.870582	0.864892	0.85909	0.853184	0.847178	0.84108	0.834896	0.828631	0.82229	0.81588	0.809404	0.9233	1.03516	1.14498	1.25273	1.3584	1.4235	1.48719	1.54947	1.61032	1.66975	1.6987
56	0	0	0	0	0	0	1.26725	2.95691	6.75865	15.207	51.0447	57.0069	62.9601	68.9043	74.8395	77.7179	48.1585	131.788	252.928	430.536	551.739	1110.26	1386.04	1487.66	1149.67	1355.04	1380.41	1628.7	1668.47	1684.49	1675.8	1641.46	1580.54	1629.06	1669.24	1700.73	1723.22	1736.36	1738.03	1729.48	1777.67	1689.44	1696.19	1693.2	1664.6	1684.99	1679.04	1655.87	1603.97
60	0	0	0	0	0	0	0	0	0	0	0	0	0	0	0	0	0	0	0	0	0	0	0	0	0	0	0.0917637	0.156288	0.181834	0.211299	0.245258	0.284366	0.329373	0.381131	0.440616	0.508937	0.587359	0.677323	0.780471	0.898671	1.03405	1.09052	1.14498	1.19611	1.24225	1.28144	1.31127	1.32889	1.32257
64	0	0	0	0	0	0	0	0.0138906	0.0317499	0.0714372	0.102356	0.172106	0.286172	0.471508	0.770983	1.25257	2.02375	3.25411	5.21058	5.54166	5.8744	6.20879	6.54482	7.5707	8.66605	11.3438	15.81	20.6225	22.8311	23.5659	24.3203	25.0947	25.8896	26.7056	27.543	28.4024	29.2844	30.1896	31.1183	34.2264	37.6398	41.3883	45.5044	50.0236	56.2069	63.147	70.9359	79.6764	88.9246
68	0	0	0	0	0	0	0	0	0	0	0	0	0	0	0	0	0	0	0	0	0	0	0	0	0	0	2441.79	5082.9	5250.28	5422.22	5598.85	5780.29	5966.64	6158.04	6354.61	6556.48	6763.77	6976.63	7195.2	8644.38	10384.1	10638.6	10896.2	13157.6	11440.4	9681.71	15966.8	14111	16328.4
70	0	0	0	0	0	0	0	3.40814	7.79004	17.5276	31.0311	35.2036	39.5299	43.9853	48.5726	53.2952	58.156	63.1582	68.3053	73.6004	79.047	88.109	97.6653	107.716	118.263	129.305	164.817	171.598	184.302	194.354	204.921	216.026	227.697	239.96	252.846	266.384	280.606	295.546	311.238	333.95	358.271	384.315	412.2	442.053	495.241	554.763	621.367	695.889	774.391
72	0	0	0	0	0	0	0	0	0.011029	0.0248153	0.0551451	0.123266	0.272482	0.596865	1.29753	2.80267	6.02055	12.8715	27.4039	58.1294	122.902	158.312	205.208	268.091	353.659	472.152	639.734	3495.93	3901.34	4304.89	4729.99	5178.3	5651.79	6152.69	6683.63	7247.7	7848.55	8490.57	9179.1	9920.71	10723.6	10745.6	10778.8	10827.7	10899	11002.4	11152.9	11374.9	11638
76	0	0	0	0	0	0	0	0	0	0	0	0	0	0	0	0	0	0	0	0	0	0	0	0	0	0	198.814	413.858	458.488	508.463	564.567	627.728	699.06	779.902	871.877	976.962	1097.59	1385.29	1714.36	2098.07	2508.18	3239.47	4198.35	5462.02	7138.01	9380.19	12412.5	16576.6	22272.7
84	0	0	0	0	0	0	0	0	0	0	0	0	0	0	0	0	0	0	0	0	0	0	0	0	0	0	3.68292	4.09973	4.40678	4.736	5.08897	5.46734	5.87291	6.30757	6.77337	7.27249	7.80725	8.38015	8.99384	9.21735	9.44517	9.67738	9.91403	10.1552	11.3237	12.6251	14.0745	15.6885	17.3763
86	0	0	0	0	0	0	0	0	0	0	0	0	0	0	0	0	0	0	0	0	0	0	0	0	0	0	0	0	0	0	0	0	0	0	0	0	0	0	0	0	0	0	0	0	0	0	0	0	0
90	0	0	0	0	0	0	0	0	3.33611e-05	7.50625e-05	9.10987e-05	0.000150142	0.000244485	0.000394095	0.00062973	0.000998518	0.00157227	0.00245976	0.00382468	0.0059115	0.00908218	0.0138666	0.0210295	0.031652	0.047216	0.0696478	0.101192	0.143731	0.180048	0.225414	0.282048	0.352697	0.440762	0.550448	0.686943	0.856639	1.0674	1.32886	1.65282	1.73422	1.81761	1.90269	1.98905	2.07619	2.12025	2.16102	2.1976	2.22889	2.23944
92	0	0	0	0	0	0	0	0	0	0	0	0	0	0	0	0	0	0	0	0	0	0	0	0	0	0	0.682421	1.3927	1.497	1.60884	1.72875	1.85728	1.99505	2.14271	2.30095	2.4705	2.65216	2.84678	3.05525	3.13118	3.20857	3.28745	3.36784	3.44978	3.53721	3.62642	3.71746	3.81036	3.88073
96	0	0	0	0	0	0	0	0	0.000786885	0.00177049	0.00214874	0.00354138	0.00576664	0.00929547	0.0148534	0.0235519	0.037085	0.0580182	0.0902123	0.092956	0.095209	0.116292	0.195959	0.216291	0.234651	0.192296	0.232824	0.264559	0.275113	0.300596	0.328249	0.358229	0.390699	0.425827	0.463784	0.504745	0.548881	0.596361	0.647344	0.677342	0.707946	0.739031	0.770436	0.80196	0.807836	0.812166	0.852785	0.889433	0.915654
100	0	0	0	0	0	0	0	8.0643	18.4327	41.4735	85.0501	118.82	155.417	148.328	138.988	127.679	114.663	235.336	421.547	799.567	1103.48	1609.87	1432.24	1190.12	790.4	867.223	1150.34	505.141	530.442	556.913	584.607	613.578	643.88	675.574	708.719	743.381	779.624	817.518	857.136	898.552	941.845	987.096	1034.39	1049.03	1063.75	1078.55	1093.43	1108.38	1116.4
104	0	0	0	0	0	0	0.887203	1.08232	6.49126	14.6053	27.5349	33.2793	39.4114	45.8819	52.6366	59.6158	66.753	73.9732	81.1911	88.3082	95.209	121.137	146.969	142.555	168.656	192.296	209.541	16.4213	17.7971	19.2847	20.8933	22.6322	24.512	26.5437	28.7395	31.1123	33.6761	36.446	39.4382	42.6704	46.1613	49.9314	54.0026	60.6696	68.1515	76.5469	85.9667	96.5347	107.712
108	0	0	0	0	0	0	0	0	0.265913	0.598304	0.809768	1.3026	2.07144	3.26301	5.09912	7.91409	12.2101	18.7394	28.6253	37.4179	46.7722	59.0636	71.9758	85.432	99.3489	113.635	127.727	141.959	145.856	149.186	152.643	156.24	159.991	163.915	168.033	172.369	176.952	181.82	187.014	192.589	198.612	205.17	212.375	220.378	229.384	239.689	251.726	266.182	282.438
112	0	0	0	0	0	0	0	0	2.22654	5.00971	12.9881	32.6613	39.3949	46.5669	54.1145	57.2016	60.044	67.8399	75.7279	83.5991	91.3264	139.423	211.417	212.105	210.891	276.437	334.552	422.086	499.738	542.178	587.876	637.035	689.859	746.555	807.329	872.38	941.899	1016.06	1095.02	1178.89	1267.73	1361.57	1460.31	1563.77	1671.59	1783.22	1897.84	2014.23	2117.38
116	0	0	0	0	0	0	2.42297	3.93508	4.20289	9.45651	13.7576	16.2701	19.0106	21.9888	25.2122	28.686	32.4114	36.3848	40.5955	44.1541	47.6045	53.3004	58.7876	63.904	68.44	72.1109	77.5303	80.6905	81.82	82.9078	83.9501	84.943	85.882	86.7624	87.5791	88.3264	88.9979	89.5869	90.0856	90.4853	91.556	92.959	94.2559	95.4262	30.8445	41.5734	56.2773	76.1733	102.447
120	0	0	0	0	0	0	0	40.4225	66.2445	105.466	161.866	204.599	255.6	316.213	387.961	472.552	571.89	688.073	823.373	980.195	1161	1368.14	1603.64	1868.66	2162.69	2481.92	2815.71	3138.27	3131.03	3176.88	3223.09	3269.71	3316.76	3364.31	3412.39	3461.09	3510.47	3560.65	3611.72	3663.85	3717.22	3772.06	3828.71	3887.59	3949.31	4014.74	4085.24	4162.99	4225.25
124	0	0	0	0	0	0	0	0	0	0	0	0	0	0	0	0	0	0	0	0	0	0	0	0	0	0	0	0	0	0	0	0	0	0	33.5519	50.9415	77.3329	117.38	193.932	294.281	446.495	677.353	1027.44	1558.29	2368.73	2917.6	3771.87	3844.36	5589.14
132	0	0	0	0	0	0	0	0	0	0	0	0	0	0	0	0	0	0	0	0	0	0	0	0	0	0	1.29203	2.5191	2.71177	2.95423	3.21728	3.50254	3.81177	4.14683	4.50972	4.90257	5.32763	5.78733	6.28422	6.82099	7.40051	8.02578	8.69997	9.42637	10.2084	11.0497	11.9538	12.9246	13.8786
136	0	0	0	0	0	0	0	0	0	0	0	0	0	0	0	0	0	0	0	0	0	0	0	0	0	0	0.522767	0.58193	0.625514	0.672246	0.722347	0.776055	0.833622	0.89532	0.961437	1.03228	1.10819	1.18951	1.27662	1.30834	1.34068	1.37364	1.40723	1.44147	1.478	1.51528	1.55332	1.59214	1.62154
140	0	0	0	0	0	0	15.6655	25.9928	41.8211	65.2525	98.1418	114.056	131.02	149.067	168.226	188.52	209.967	232.578	256.352	281.277	307.325	334.447	362.574	391.6	421.385	451.738	482.402	513.038	519.99	532.946	546.467	560.616	575.464	591.095	607.608	625.12	643.773	663.737	685.224	708.494	733.878	761.801	792.822	827.692	867.453	913.599	968.378	1035.36	1113.69
144	0	0	0	0	0	0	0	0	2.11446	4.75754	5.76832	7.39312	9.17076	11.0849	13.1177	15.2495	17.4584	19.7198	22.0056	24.2838	26.5164	30.3441	34.0601	33.1164	31.5315	33.2764	40.1708	45.421	45.7357	44.8766	44.0056	43.1228	42.2279	41.3206	40.4007	39.4675	38.5204	37.5585	36.5809	35.5862	41.2495	51.02	183.463	195.265	207.801	221.115	235.256	250.272	264.553
148	0	0	0	0	0	0	91.5803	213.687	488.428	1098.96	1500.82	1897.35	2370.75	2933.56	3600.01	4386.12	5309.77	6390.73	7650.52	8416.03	9186.83	10190.5	11190.8	12506.3	14134.7	15210.3	17676.3	19819.2	20590.9	20876.4	21163.8	21453.4	21745.7	22040.9	22339.6	22642.4	22950.1	23263.5	23583.8	23912.6	24251.9	24604.1	24972.8	25362.8	25781.2	26238.1	26749.3	27340.6	27882
152	0	0	0	0	0	0	0	0	0	0	0	0	0	0	0	0	0	0	0	0	0	0	0	0	0	0	269.033	560.028	582.584	605.943	630.133	655.181	681.115	707.964	735.76	764.533	794.316	825.142	857.046	958.051	1070.82	1196.7	1497.17	1903.33	2268.51	2668.94	3058.74	3472.31	4027.08
156	0	0	0	0	548.915	1143.57	2287.14	4447.22	8470.9	9529.77	18896.6	7489.11	6948.6	3860.62	5749.48	7709.69	11159	9899.66	8275.7	10628.1	10429.4	27093.2	32553.1	26490.5	24700.9	33044.8	37016.7	39068.5	41427.9	48207	51920.8	59177.2	74746.2	83625.4	94576.1	119890	131476	130049	154072	160783	179076	191598	202389	201159	167175	165464	166741	173346	177517
158	0	0	0	0	0	0	0	0	2.35614	5.30131	6.8488	7.52267	8.16349	8.76917	9.33735	9.86532	10.3499	10.7874	11.1733	11.5023	11.7678	14.3537	16.9015	19.3385	21.5708	23.4697	22.5869	105.775	120.402	126.73	133.295	140.096	147.126	154.377	161.836	169.487	177.308	185.269	193.333	201.454	204.644	208.828	212.64	215.662	217.859	219.538	220.035	243.456	265.262
162	0	0	0	0	0	0	0	0	0	0	0	0	0	0	0	0	0	0	0	0	0	0	0	0	0	0	0	0	0	0	0	0	0	0	0	0	0	0	0	0	0	0	0	0	0	0	0	0	0
166	0	0	0	0	0	0	0	0	0	0	0	0	0	0	0	0	0	0	0	0	0	0	0	0	0	0	0	0	0	0	0	0	0	0	0	0	0	0	0	0	0	0	0	0	0	0	0	0	0
170	0	0	0	0	0	0	0	0	0	0	0	0	0	0	0	0	0	0	0	0	0	0	0	0	0	0	1357.3	2825.4	3078.57	3353.84	3653.12	3978.44	4332.05	4716.34	5133.94	5587.69	6080.66	6616.18	7197.87	7829.64	8515.74	9260.76	10069.7	11188.5	12430.2	13808.1	15336.8	17033	18796.4
174	0	0	0	0	0	0	0	0	0	0	0	0	0	0	0	0	0	0	0	0.580995	1.19016	1.45371	1.71472	1.96639	2.2	2.40388	2.91059	3.30743	3.29786	3.53901	3.79558	4.0683	4.35785	4.66488	4.99	5.33377	5.69665	6.07896	6.48088	6.90239	7.34317	7.8026	8.27956	8.7724	9.2787	9.7951	10.317	10.838	11.2786
175	0	0	0	0	0	0	0	0	0	0	0	0	0	0	0	0	0	0	0	0	0	0	0	0	0	0	0	0	0	0	0	0	0	0	0	0	0	0	0	0	0	0	0	0	0	0	0	0	0
178	0	0	0	0	0	0	40.9994	95.6654	135.445	184.859	239.936	301.414	374.122	459.709	559.996	676.968	812.757	969.605	1149.81	1355.6	1589.01	1851.57	2143.91	2465.11	2811.59	3175.23	3539.98	3875.06	3908.85	3957.72	4006.93	4056.58	4106.76	4157.6	4209.26	4261.94	4315.86	4371.32	4428.69	4488.46	4551.23	4617.81	4689.3	4767.2	4853.6	4951.58	5065.8	5203.72	5344.53
180	0	0	0	0	0	0	63.9739	149.272	204.324	269.656	338.066	483.883	685.175	961.601	1339.36	1853.23	2549.04	3486.89	4744.83	5496.09	6249.04	7412.44	8552.8	9637.24	11154.2	12493.1	12790.7	12712.3	12824.4	12910.5	12992	13068.6	13140	13205.9	13266	13319.9	13367.1	13407.3	13439.7	13463.9	13479.2	13484.9	13480.2	13464.2	13436	13395	13340.7	13273.5	13114
184	0	0	0	0	0	0	0	0	0	0	0	0	0	0	0	0	0	0	0	0	0	0	0	0	0	0	0	0	0	0	0	0	0	0	0	0	0	0	0	0	0	0	0	0	0	0	0	0	0
188	0	0	0	0	0	0	0	0	0	0	0	0	0	0	0	0	0	0	0	0	0	0	0	0	0	0	2.79844	10.9555	12.3049	13.8102	15.4887	17.3594	19.4432	21.7634	24.3458	27.2186	30.4134	33.9647	39.5863	46.0633	56.6413	70.4961	85.6648	93.1421	111.164	133.67	152.003	180.68	204.539
191	0	0	0	0	0	0	0	7.58642	15.4425	30.9429	61.2361	66.7767	72.076	77.0903	81.8298	86.3049	90.5253	188.698	343.288	508.695	579.326	821.589	720.741	585.541	741.539	585.375	607.379	614.254	587.611	568.301	545.049	517.506	485.304	489.181	491.993	493.625	493.952	492.838	492.096	499.135	504.516	507.97	509.197	507.869	526.175	541.473	552.786	558.952	555.097
192	0	0	0	0	0	0	0	0	0	0	0	0	0	0	0	0	0	0	0	0	0	0	0	0	0	0	26.1164	33.3118	38.4577	44.391	51.231	59.1151	68.2017	78.6728	90.7375	104.637	120.648	139.089	160.327	184.783	229.897	284.939	353.113	371.433	389.361	412.883	438.364	465.365	602.474
196	0	0	0	0	0	0.2475	0.470061	0.859738	1.51921	2.58522	4.17302	4.74134	5.32224	5.91375	6.51342	7.11823	7.72441	8.32731	8.92112	8.03419	7.04366	7.15739	8.18386	9.63451	7.15959	9.33881	5.38446	4.61075	4.61177	4.60956	4.60392	4.59466	4.58156	4.56435	4.54276	4.51647	4.48511	4.44824	4.72579	4.98958	5.23735	5.46646	5.6738	6.18528	6.65107	7.062	7.4063	7.66827	8.35898
203	0	0	0	0	0	1.83593	4.43581	10.4197	23.9763	54.3086	121.496	130.697	139.038	146.57	153.341	159.398	164.785	338.545	607.028	996.384	1241.41	1998.46	2217.67	2570.67	2586.77	2341.5	2981.68	3015.43	2899.82	2767.01	2616.51	2447.78	2260.34	2242.2	2218.02	2187.62	2150.82	2107.45	2065.54	2017.23	2252.04	2450.76	2429.7	2456.77	2476.48	2459.7	2394.77	2356.26	2292.62
204	0	0	0	0	0	1.7402	3.32295	6.12298	10.9381	18.9411	31.5911	39.8494	49.6852	61.3544	75.1483	91.3971	110.474	132.798	158.838	189.113	224.196	264.708	311.318	364.731	419.017	473.58	495.748	480.125	447.617	417.223	388.815	362.269	337.469	314.306	292.678	272.488	253.643	236.06	219.656	207.548	196.075	185.203	174.905	165.151	169.704	174.353	179.101	183.948	187.715
208	0	0	0	0	0	0.438733	0.588904	0.768517	0.982445	1.2363	34.0201	40.216	46.6251	53.1933	59.8716	66.6154	73.3844	160.029	303.514	464.472	551.739	864.082	824.575	714.075	574.837	650.417	644.19	744.55	710.18	673.116	633.023	589.712	542.97	546.113	539.186	530.818	520.971	509.604	525.173	536.542	561.42	565.664	587.639	621.645	642.668	652.602	656.425	660.843	658.06
212	0	0	0	0	0	0	0	0	0	0	0	0	0	0	0	0	0	0	0	0	0	0	0	0	0	0	0.0707845	0.0902863	0.104646	0.121268	0.140506	0.16277	0.188531	0.218336	0.252814	0.292693	0.338812	0.392144	0.453808	0.525097	0.607504	0.702754	0.795346	0.941475	1.01948	1.03649	0.729731	1.01553	1.19233
214	0	0	0	0	0	0	0	0	0	0	0	0	0	0	0	0	0	0	0	0	0	0	0	0	0	41.4099	43.1721	45.8887	47.4883	49.1351	50.8305	52.5758	54.3722	56.2213	58.1244	60.0829	62.0985	64.1725	66.3067	70.4598	74.8631	79.5313	84.4799	89.7254	116.724	151.829	198.491	257.809	320.487
218	0	0	0	0	0	0	0	0	0	0	0	0	0	0	0	0	0	0	0	0	0	0	0	0	0	0	126.361	173.785	180.423	187.176	194.043	201.025	208.122	215.334	222.66	230.102	237.658	245.33	255.923	266.698	346.889	412.3	489.612	519.782	542.867	581.497	596.168	606.779	638.85
222	0	0	0	0	0	0	0	0	0	0	0	0	0	0	0	0	0	0	0	0	0	0	0	0	0	0	11.1154	16.699	17.5283	18.4398	19.4625	20.6393	22.0326	23.7352	25.8849	31.4328	37.3005	43.495	50.578	58.1301	70.1085	82.8935	96.5036	107.151	115.864	130.135	141.304	149.263	173.989
226	0	0	0	0	0	0.369193	0.545382	0.782698	1.09946	1.51893	2.07046	2.5662	3.14535	3.82019	4.60469	5.51471	6.56825	7.78576	9.19042	10.9436	12.8282	13.4939	14.1567	22.2246	27.0781	32.2538	35.6524	39.2068	39.9209	40.6407	41.3775	42.1331	42.9097	43.7099	44.537	45.3947	46.2878	47.2223	48.2058	49.2483	50.3632	51.5691	52.8929	54.3753	56.0827	58.1333	60.7714	64.6365	72.1051
231	0	0	0	0	0	91.5475	146.1	224.565	333.562	477.355	648.77	871.577	1156.86	1520.03	1979.83	2558.88	3284.28	4188.14	5308.06	5469.16	5601.32	5700.87	5763.15	5782	5749.01	5652.05	5472.45	5178.58	5302.28	5423.41	5541.64	5656.6	5767.9	5875.14	5977.83	6075.49	6167.57	6253.45	6332.46	6403.86	8901.89	11348.8	13733.9	16045.5	18269.9	20391.3	22391.3	24248	25772.6
232	0	0	0	0	0	24.8901	35.5798	49.0461	65.4731	84.5518	104.702	124.272	145.775	169.334	195.071	223.1	253.532	286.459	321.957	352.93	384.005	454.391	526.152	632.777	739.849	845.616	955.043	1058.41	1086.65	1118.03	1151.07	1185.95	1222.89	1262.16	1304.07	1349	1397.4	1449.82	1506.96	1569.68	1639.09	1716.63	1804.22	1904.47	2021.08	2159.43	2327.78	2539.58	2801.01
233	0	0	0	0	0	0	0	0.319856	1.4622	6.5799	29.244	68.8094	78.594	88.86	99.5865	110.741	122.278	134.132	146.215	158.406	170.544	182.411	193.71	204.028	212.777	219.084	221.564	217.792	254.134	296.331	345.276	401.986	467.613	543.457	630.979	731.812	847.76	980.806	1133.1	1280.24	1443.84	1624.92	1824.23	2042.08	2073.01	2095.46	2106.82	2103.5	2067.32
234	0	0	0	0	0	0.122396	0.208104	0.340785	0.542928	0.847002	0.994645	1.13812	1.28781	1.44394	1.60669	1.7763	1.95297	2.13694	2.32844	2.52771	2.735	2.95056	3.17465	3.40754	3.64951	3.90084	4.16183	4.43276	5.61643	7.11494	9.01174	11.4123	14.4501	18.2936	23.1559	29.3061	37.0845	46.9207	59.3576	75.081	94.9567	120.079	151.827	191.947	242.638	306.681	387.582	489.769	614.961
238	0	0	0	0	0	0	0	0	0	0	0	0	0	0	0	0	0	0	0	0	0	0	0	0	0	0	0	0	0	0	0	0	0	0	0	0	0	0	0	0	0	0	0	0	0	0	0	0	0
242	0	0	0	0	0	0	0	0	0	0.647041	0.806321	0.988314	1.19732	1.43655	1.70946	2.0198	2.3716	2.76912	3.21684	3.71939	4.28147	4.9077	5.60242	6.3694	7.21148	8.12988	9.12343	10.1872	10.826	11.5024	12.2185	12.9764	13.7786	14.6273	15.5253	16.4751	17.4796	18.5418	19.6648	20.9098	22.2295	23.6281	25.11	26.6801	27.7773	28.9145	30.5165	32.1325	33.5508
246	0	0	0	0	0	0.104363	0.178389	0.261018	0.345927	0.494475	1.36831	1.12713	1.63073	2.18946	2.79732	3.4477	4.13325	4.84576	5.57585	7.11622	8.68748	10.2593	11.7949	13.2481	11.9334	11.6744	22.4374	41.934	45.8635	50.126	54.7441	59.7404	65.1377	70.9585	77.2239	83.9532	91.1628	98.8647	107.065	115.759	133.315	139.604	155.292	160.753	168.688	178.735	199.492	218.76	237.769
250	0	0	0	0	0	8.51641	20.2971	47.1856	134.022	302.13	840.039	1040.9	1249.14	1165.52	1061.41	1048.18	1026.71	2223.13	4189.82	7018.3	8884.87	14187	15956.7	18811.7	15708.5	16116.6	16854.2	20467.8	19676.7	18769.7	17743.6	16594.7	15319.9	15178.8	14998	14776.4	14512.7	14205.8	14896	15408	15648.3	16022.7	16335.1	16237.3	16015.6	16018.7	15852	15572.5	15163.6
254	0	0	0	0	0	0	0	0	0	0	0	0	0	0	0	0	0	0	0	0	0	0	0	0	0	0	0.0790033	0.118689	0.136899	0.157785	0.181729	0.209164	0.240582	0.276545	0.317692	0.364748	0.418538	0.48	0.556301	0.644063	0.74494	0.860814	0.993834	1.04604	1.09585	1.1419	1.18254	1.21574	1.23136
258	0	0	0	0	0	0	0	0	0	0	0.000857348	0.00142432	0.00233941	0.00380655	0.00614522	0.00985423	0.0157101	0.0249181	0.0393443	0.0618699	0.0969336	0.151357	0.2356	0.365667	0.565989	0.873779	1.34559	2.06718	2.20135	2.34379	2.49501	2.65554	2.82591	3.00671	3.19857	3.40214	3.6181	3.84719	4.09019	4.35998	4.64691	4.95204	5.27649	5.62145	5.86863	6.1259	6.39364	6.67226	6.91868
262	0	0	0	0	0	1.73886	3.23494	5.83369	10.2799	17.7942	30.3662	34.7102	39.2353	43.9474	48.8526	53.9568	59.2665	64.7882	70.5284	79.129	88.2422	111.852	137.477	165.127	194.815	226.551	251.472	277.701	281.098	287.611	294.349	301.334	308.59	316.147	324.038	332.302	340.988	350.151	359.86	370.2	381.277	393.224	406.217	420.485	436.342	454.234	474.812	499.091	525.466
266	0	0	0	0	0	0	0	0	16.0066	28.0926	48.4943	62.1481	78.7611	98.9064	123.261	152.626	187.943	230.325	281.081	341.752	414.151	500.408	603.022	724.931	869.577	1041	1243.92	1483.89	1534.8	1569.83	1606.03	1643.51	1682.42	1722.88	1765.08	1809.23	1855.56	1904.36	1956	2010.9	2069.61	2132.82	2201.42	2276.59	2359.94	2453.74	2561.32	2687.85	2824.19
268	0	0	0	0	0	0.5709	1.59852	4.35153	11.6041	30.4607	78.9722	189.135	219.889	253.053	288.666	326.736	367.221	410.019	454.942	494.635	532.92	812.277	1092.65	1367.91	1083.3	1325.84	1527.44	1665.54	1060.4	1148.2	1242.34	1343.13	1450.88	1565.85	1688.27	1818.32	1956.1	2101.62	2254.73	2415.11	2582.2	2755.09	2932.45	3112.33	3291.94	3467.35	3632.89	3780.35	3873.09
270	0	0	0	0	0	0.0129318	0.0218174	0.0355263	0.0563563	0.0876222	0.134084	0.171794	0.217664	0.273273	0.340486	0.421504	0.518924	0.635804	0.775749	0.942996	1.14253	1.38021	1.6629	1.99868	2.39702	2.869	3.42762	4.0881	3.74141	3.42353	3.13213	2.86506	2.62034	2.39614	2.1908	2.00276	1.83058	1.67298	1.52873	2.32037	3.52149	5.34367	8.1077	12.2999	18.6575	28.2979	42.9146	65.0738	98.0474
275	0	0	0	0	0	1.42208	2.16605	3.18028	4.51888	6.20368	8.14318	9.1657	10.1952	11.2288	11.7414	12.1875	12.5679	12.8833	13.1342	13.3207	13.4422	13.4978	13.4859	13.4037	13.2473	13.0111	12.6865	12.2611	13.7259	15.3616	17.1875	19.2251	21.4985	24.0341	26.8615	30.0132	33.5255	37.4384	40.3036	43.3757	46.6686	50.197	53.9762	58.0226	58.7842	59.5372	60.2807	61.0134	61.3485
276	0	0	0	0	0	3.69638	8.68545	18.8027	42.5199	95.0443	510.301	594.1	679.95	716.064	748.395	721.666	687.979	1470.85	2740.05	4151.6	4827.72	7401.71	9240.27	10711.1	9341.1	9756.26	11043.3	12098.9	12174.5	12104.9	11884.7	11508.2	10969.7	11214.3	11407.1	11546.2	11629.6	11655.3	11326.5	10901.6	11227.5	11267.3	10889	10625.4	10440.5	10301.5	9845.58	9578.33	10874
288	0	0	0	0	0	0	0	12.6113	22.5014	39.3514	67.7351	86.7839	109.955	138.044	171.995	212.919	262.126	321.163	391.848	476.323	577.105	697.151	839.933	1009.53	1210.71	1449.09	1731.23	2064.8	2109.77	2156.06	2203.81	2253.14	2304.2	2357.2	2412.32	2469.83	2530.01	2593.22	2659.88	2730.53	2805.81	2886.55	2973.82	3069.03	3174.1	3291.74	3425.89	3582.66	3748.63
292	0	0	0	0	0	0	0	0	0	0	0	0	0	0	0	0	0	0	0	0	0	0	0	0	0	0	0	0	0	0	0	0	0	0	0	0	0	0	0	0	0	0	0	0	0	0	0	0	0
296	0	0	0	0	0	0	0	0	0	0	0	0	0	0	0	0	0	0	0	0	0	0	0	0	0	0	0	0	0	0	0	0	0	0	0	0	0	0	0	0	0	0	0	0	0	0	0	0	0
300	0	0	0	0	0	1.74762	4.27259	10.1456	35.369	134.754	304.02	340.289	376.662	361.497	337.289	279.681	209.275	238.031	268.678	301.222	335.67	382.661	436.422	489.693	369.494	429.392	672.426	700.838	742.321	784.66	827.853	871.902	916.806	962.567	1009.18	1056.66	1104.99	1154.18	1204.22	1255.13	1391.65	1542.64	1710.2	1895.33	2100.83	2351.62	2631.45	2944.66	3170.84
304	0	0	0	0	0	0	0	0	0	0	0	0	0	0	0	0	0	0	0	0	0	0	0	0	0	0	0	0	0	0	0	0	0	0	0	0	0	0	0	0	0	0	0	0	0	0	0	0	0
308	0	0	0	0	0	0	0	0	0	0	0	0	0	0	0	0	0	0	0	0	0	0	0	0	0	0	0.357629	0.537278	0.603455	0.677279	0.759595	0.851335	0.953529	1.06732	1.19396	1.33485	1.49153	1.66569	1.87984	2.02405	2.1772	2.33975	2.51221	2.45908	2.39851	2.32694	2.24356	2.14749	2.02507
312	0	0	0	0	0	0	0	0	0	0	0	0	0	0	0	0	0	0	0	0	0	0	0	0	0	0	3.59999	4.00741	4.30755	4.62937	4.97438	5.34424	5.74067	6.16555	6.62086	7.10874	7.63146	8.19146	8.79133	9.00981	9.2325	9.45947	9.6908	9.92656	10.1781	10.4349	10.6968	10.9641	11.1666
316	0	0	0	0	0	0.0030444	0.00433804	0.00595361	0.00789614	0.01009	0.0122456	0.0168185	0.0228222	0.0306566	0.0408222	0.0539408	0.0707795	0.0922767	0.119567	0.154005	0.197172	0.250867	0.317045	0.39766	0.494332	0.607654	0.735722	0.87084	0.918628	0.9685	1.02049	1.07462	1.1309	1.18933	1.24989	1.31255	1.37724	1.44387	1.51231	1.58679	1.66309	1.74094	1.81996	1.89969	1.94001	1.97731	2.01078	2.03942	2.04906
320	0	0	0	0	0	0	0	0	0	0	0	0	0	0	0	0	0	0	0	0	0	0	0	0	0	0	82.032	131.751	134.932	138.088	141.217	144.319	147.392	150.435	153.449	156.431	159.382	162.3	167.017	171.693	201.737	236.031	275.911	296.724	313.109	318.995	312.959	304.813	307.993
324	0	0	0	0	0	0	0	0	32.4312	56.9092	98.2255	125.88	159.527	200.328	249.655	309.127	380.654	466.488	569.281	692.153	838.775	1013.46	1221.27	1468.15	1761.07	2108.22	2519.15	3005.1	3070.6	3138.03	3207.58	3279.44	3353.83	3431.02	3511.32	3595.09	3682.76	3774.84	3871.95	3974.86	4084.51	4202.12	4329.25	4467.93	4620.99	4792.33	4987.72	5216.06	5457.79
328	0	0	0	0	0	0	0	0	0	0	0	0	0	0	0	0	0	0	0	0	0	0	0	0	0	0	80.6593	123.125	133.9	145.51	158.014	171.476	185.962	201.546	218.303	236.316	255.67	276.46	302.098	331.348	363.075	397.47	434.737	433.49	442.779	449.853	454.215	455.295	449.615
332	0	0	0	0	0	0	0	0	0	0	0	0	0	0	0	0	0	0	0	0	0	0	0	0	0	0	2.61946	4.5092	5.85114	7.58682	9.83037	12.7287	16.4707	21.2995	27.5272	35.555	45.8981	59.218	77.2103	100.565	118.31	131.83	146.765	154.738	160.709	160.625	168.9	176.314	186.374
334	0	0	0	0	0	0	0	0	0	0	0	0	0	0	0	0	0	0	0	0	0	0	0	0	0	0	0	0	0	0	0	0	0	0	0	0	0	0	0	0	0	0	0	0	0	0	0	0	0
336	0	0	0	0	0	0	0	0	0	0	0	0	0	0	0	0	0	0	0	0	0	0	0	0	0	0	0	0	0	0	0	0	0	0	0	0	0	0	0	0	0	0	0	0	0	0	0	0	0
340	0	0	0	0	0	0	0	0	0	0	0	0	0	0	0	0	0	0	0	0	0	0	0	0	0	0	120.15	47.275	50.7675	54.4777	58.4174	62.5993	67.0366	71.7432	76.7338	82.0236	87.6287	93.5661	100.961	108.827	215.781	261.813	317.384	334.727	339.877	343.264	344.541	343.317	337.028
344	0	0	0	0	0	0	0	0	0	0	0	0	0	0	0	0	0	0	0	0	0	0	0	0	0	0	0	0	0	0	0	0	0	0	0	0	0	0	0	0	0	0	0	0	0	0	0	0	0
348	0	0	0	0	0	4.62671	7.45242	11.6705	26.8544	45.6209	51.0301	54.84	58.2814	61.3769	64.1481	55.5128	45.8653	117.668	252.928	492.041	689.674	1110.26	1232.04	1487.66	1437.09	1355.04	1150.34	1396.03	1447.41	1475.98	1480.82	1460.99	1415.59	1467.05	1510.49	1545.6	1572.04	1589.49	1611.71	1626.03	1761.53	1877.1	1901.06	1887.52	1881.9	1898.91	1913.54	1961.95	1954.48
352	0	0	0	0	0	0.321924	0.821023	2.01672	4.81943	11.2779	25.9577	29.702	33.6087	37.6831	41.9306	46.3569	50.9676	55.7688	60.7665	161.619	342.75	507.316	534.929	562.688	506.221	530.261	462.019	477.901	494.297	511.167	528.523	546.379	564.747	583.641	603.076	623.064	643.622	664.763	686.504	723.628	762.658	803.689	846.821	892.157	911.328	930.8	950.579	970.667	984.876
356	0	0	0	0	0	0	0	15.0413	34.3801	77.3553	171.901	384.248	444.919	509.442	577.817	650.044	726.123	806.055	889.838	977.474	1068.96	1164.3	1263.49	1366.54	1473.43	1584.18	1698.78	2161.04	2238.51	2317.27	2397.31	2478.63	2561.23	2645.11	2730.27	2816.71	2904.43	2993.43	3083.72	3114.51	3319.35	3294.9	3646.26	3877.47	4112.87	4177.06	4590.1	4719.79	4398.88
360	0	0	0	0	0	2.45465	3.70668	5.44186	45.914	96.909	158.633	189.029	221.31	255.331	290.95	328.032	366.448	406.074	446.793	488.492	531.063	609.771	691.319	775.445	1014.39	1262.73	1415.56	1614.38	1620.71	1626.61	1632.08	1637.13	1641.76	1711.17	1779.21	1845.85	1911.08	1974.91	2068.67	2160.49	2250.37	2338.3	2424.27	3064.01	3691.96	4308.08	4912.3	5504.59	6531.78
364	0	0	0	14.6003	53.2442	125.719	264.31	441.016	655.963	909.277	2022.88	2355.33	2707.7	3079.98	3472.18	3884.32	4316.39	4199.27	4028.54	4481.61	4958.62	5517.64	6106.57	4483.61	5027.87	5602.04	7301.34	7600.2	8027.31	8304.97	8590.78	8884.97	9187.76	9499.39	9820.09	10150.1	10489.7	10839.1	11198.6	11568.4	12363.3	13173.3	13998.3	14838.3	15693.4	18295.2	20949.3	23072.2	25077.4
368	0	0	0	1.90046	2.84151	6.50792	23.6056	46.2391	93.1468	150.76	134.937	158.461	183.607	201.23	218.876	225.795	231.128	432.66	658.405	628.9	591.363	545.777	451.117	344.319	360.573	376.849	491.432	409.463	415.02	420.58	426.142	431.707	437.274	442.845	448.417	453.992	459.57	465.151	495.425	527.599	561.788	598.115	636.711	677.713	783.092	904.75	1045.19	1207.29	1385.66
372	0	0	0	0	0	0.00614715	0.0295063	0.137696	0.629468	2.8326	12.5894	28.7152	33.735	39.2728	45.3739	52.0874	59.4662	124.54	227.635	350.579	413.804	740.171	924.027	952.1	862.255	867.223	1150.34	2326.72	2661.71	2558.58	2438.96	2301.62	2145.27	2092.44	2036.29	2211.74	2551.7	2649.94	3360.78	4343.63	5199.4	5993.94	5313.89	4821.51	4796.01	4905.45	4725.66	4743.71	4890.76
376	0	0	0	0.687028	1.321	2.36869	4.0493	6.66658	10.6048	16.2478	23.6231	38.9235	63.3628	102.103	81.5459	64.6236	50.8538	39.7574	30.8893	29.1539	27.1209	28.4932	29.6948	30.6712	22.129	27.1081	26.1203	19.6131	21.385	23.1451	24.8891	26.6125	28.3101	29.9768	31.6065	33.1928	34.7285	36.2056	37.3929	38.9475	40.5051	42.0526	43.5738	45.0479	45.0846	44.9793	44.7027	44.217	43.1995
380	0	0	0	0	0	4.20668	9.78785	22.0153	80.1782	170.212	649.402	682.022	705.938	721.321	728.354	519.271	276.246	436.253	609.078	713.805	854.936	1102.04	1478.23	2216.86	1437.12	1624.01	2378.75	2358.34	2444.36	2541.45	2641.07	2743.13	2847.55	2954.2	3062.91	3173.46	3285.58	3398.95	3513.13	3627.6	3856.67	4095.19	4342.35	4596.65	4662.96	4891.46	5157.9	5386.54	5592.56
384	0	0	0	0	0	8.6938	15.516	26.6731	44.6121	73.0681	117.712	150.853	191.177	240.073	299.187	370.459	456.178	559.044	682.234	829.488	1005.21	1214.55	1463.6	1759.47	2110.53	2526.56	3019.05	3601.44	3675.34	3751.17	3829.1	3909.32	3992.05	4077.55	4166.12	4258.09	4353.89	4454.01	4559.05	4669.73	4786.96	4911.9	5046.01	5191.24	5350.22	5526.64	5725.87	5956.17	6192.21
388	0	0	0	0	0	0	0	0	0	0	0	0	0	0	0	0	0	0	0	0	0	0	0	0	0	0	11.524	7.93504	9.61009	11.6301	14.0647	16.9973	20.528	24.7765	29.8861	36.0284	43.4086	52.2723	63.6106	68.0727	72.7763	77.7325	82.9528	80.7028	86.2368	91.6582	96.8183	101.528	104.889
392	0	0	0	0	0	2.06145	3.52364	5.80018	9.22424	14.1267	20.5218	37.5655	57.0668	96.3206	139.842	221.596	309.931	484.467	613.194	734.379	704.178	739.374	769.982	878.798	1109.21	1435.01	1905.57	2794.96	3036.27	3034.67	3030.81	3024.55	3015.74	2983.5	2948.55	2910.75	2869.92	2825.86	2878.27	2924.65	2964.17	2995.84	3018.48	3065.15	3097.9	3226.9	3397.08	3643.95	3874.42
398	0	0	0	0	2.2863	6.66837	18.6714	50.8278	135.541	355.795	922.431	2209.18	2624.74	3090.08	3610.3	4190.98	4838.21	5558.67	6359.64	6919.58	7500.34	8102.02	8724.77	10229.1	12040.8	14084	16813.8	19729.6	19808.1	19881.7	19950.3	20013.9	20072.6	20126.2	20174.9	20218.6	20257.3	20290.9	20319.6	20343.3	20361.9	20375.5	20384.1	20387.7	20386.2	26528.4	31676.7	43444.4	55112.6
400	0	0	0	1.13381	2.03659	3.4068	5.44484	8.43073	12.7543	18.9565	27.7866	44.675	71.0306	111.908	93.5901	77.7683	64.2655	52.8535	43.2863	42.2615	40.7998	44.4312	48.215	52.1521	39.7351	52.4512	54.8115	45.3509	47.0621	47.7879	48.5168	49.2487	49.9836	50.7215	51.4625	52.2065	52.9536	53.7038	54.457	55.2133	58.8008	62.6134	66.6647	70.9693	75.5428	95.4768	120.657	152.461	191.422
404	0	0	0	0	0	59.2032	86.7523	123.161	170.248	229.146	297.992	411.977	562.926	761.714	1022.17	1361.77	1802.56	2372.12	3104.72	3773.11	4469.18	5414.83	6380.83	7349.57	8297.34	9190.22	10644.7	11866.8	12216.9	12417.1	12620.4	12827	13037.3	13251.6	13470.5	13694.3	13923.9	14159.9	14403.2	14655.1	14916.9	15190.6	15478.6	15784.2	16111.9	16468.3	16863.2	17312.4	17731.9
408	0	0	0	0	0	1.71565	2.4438	3.35224	4.44264	5.66982	6.8637	9.64416	13.3879	18.3965	25.0574	33.865	45.4461	60.588	80.2695	92.9409	105.622	128.787	173.235	130.005	150.268	167.983	201.739	235.487	258.707	272.177	286.135	300.57	315.465	330.795	346.529	362.621	379.015	395.637	412.392	429.161	430.955	426.51	421.079	414.518	406.645	397.019	387.697	375.959	358.873
410	0	0	0	0	0	1.71762	2.44661	3.35609	4.44774	5.67633	6.87158	10.3737	15.4723	22.8429	33.429	48.5413	69.9888	100.252	142.701	165.228	187.771	228.955	307.973	231.119	267.141	298.635	358.645	418.638	460.42	493.044	527.584	564.095	602.62	643.189	685.812	730.476	777.134	825.7	876.036	927.937	926.603	914.288	899.931	891.08	879.157	858.659	834.132	804.687	775.796
414	0	0	0	0	0	0.426638	0.765617	1.33573	2.28273	3.84009	6.37999	7.37412	8.42871	9.54674	10.7313	11.9856	13.3131	14.7173	16.2019	17.1783	18.1541	19.1293	20.1039	21.0778	22.051	23.0237	46.9481	42.3355	43.859	44.8835	45.9242	46.9813	48.055	49.1455	50.2532	51.3782	52.5207	53.6811	54.8595	56.0561	57.2713	58.5053	59.7584	61.0307	62.3226	63.6344	64.9662	66.3184	67.2681
417	0	0	0	0	0.554516	1.61734	4.52855	12.3277	32.8739	86.294	223.725	535.813	623.149	717.403	818.716	927.139	1042.6	1164.86	1293.45	1390.37	1482.94	1629.56	1768.74	1896.01	2005.55	2089.37	2308.9	2452.57	2595.16	2742.49	2896.4	3057	3224.32	3398.37	3579.11	3766.4	3960.04	4159.74	4365.04	4575.38	4789.97	5007.8	5227.56	5447.58	5665.7	5879.19	6084.48	6276.99	6410.34
418	0	0	0	0	0	1.93651	2.86637	4.12259	5.80486	8.04062	10.9921	13.1945	15.6626	18.4236	21.5072	24.9461	28.7758	33.0353	37.7672	46.9705	56.9387	67.6676	79.1528	91.3901	104.375	118.104	153.642	191.558	197.312	203.15	209.07	215.073	221.16	227.329	233.581	239.916	246.333	252.833	284.992	317.819	351.314	385.477	420.306	455.803	491.965	528.794	566.288	604.447	588.657
422	0	0	0	1.92374	3.4582	5.80011	9.28097	14.3182	21.3842	30.876	42.687	53.5555	66.4031	81.5274	77.6828	73.4816	69.0594	64.5246	59.9637	58.5463	56.6638	61.478	66.1987	70.755	57.2486	61.7482	72.1305	61.3179	58.6635	57.9678	57.2661	56.5587	55.8463	55.1292	54.4079	53.6828	52.9544	52.2231	51.4891	50.753	55.503	59.7598	64.3271	69.2258	74.4785	89.2602	90.489	101.003	101.699
426	0	0	0	0	0	0	0.00291374	0.00708274	0.0179947	0.0495792	0.158419	0.218862	0.299975	0.408839	0.555094	0.75195	1.01764	1.37753	1.86728	2.53748	3.46087	4.74349	6.54237	9.09455	12.7656	18.1341	26.144	152.017	171.088	191.702	214.032	238.279	264.678	293.51	325.111	359.885	398.327	441.05	488.821	542.614	603.694	624.206	648.016	676.155	710.127	752.216	806.077	877.965	973.479
428	0	0	0	0	0	0	0.00642611	0.0299885	0.13709	0.616907	2.74181	6.45132	7.37991	8.35804	9.38481	10.4585	11.5764	12.7345	13.9271	15.1465	16.3821	17.62	18.8412	20.0201	21.1217	22.0972	22.8758	23.3506	27.3862	32.1075	37.6286	44.0824	51.623	60.4296	70.7098	82.7045	96.6923	112.996	131.988	150.954	172.56	197.155	225.135	256.938	284.916	315.739	349.659	386.94	425.186
430	0	0	0	0	0	3.26967	6.23913	11.4743	20.5387	36.0101	62.1114	73.3096	85.5654	98.9613	113.585	129.533	146.904	165.807	186.36	208.684	232.913	259.19	287.664	318.499	351.868	387.955	426.958	469.088	479.794	490.844	502.271	514.11	526.403	539.197	552.549	566.524	581.201	596.674	613.057	630.49	649.149	669.256	691.099	715.059	741.658	771.628	806.048	846.594	890.464
434	0	0	0	0	0	33.5826	64.2329	118.33	212.078	372.205	642.503	810.536	998.668	987.606	957.286	1089.03	1229.27	1378.09	1535.53	1667.63	1804.39	1335.37	804.598	1269.52	1776.64	2326.26	2432.26	2538.78	2394.09	2442.8	2491.96	2541.58	2591.66	2642.19	2693.18	2744.63	2796.54	2848.91	2901.73	3179.6	3245.57	3312.23	3379.57	3447.59	3516.31	3585.71	3838.88	4427.64	4625.26
438	0	0	0	0	0	0.218611	0.301822	0.40513	0.532701	0.689498	0.881429	0.966569	1.04819	1.12639	1.20127	1.27293	1.34147	2.80943	5.13511	7.64521	8.74773	11.9748	10.1696	8.01929	9.88102	7.60557	6.58841	6.79897	6.5256	6.21914	5.87771	5.49933	5.08194	5.04785	5.00285	4.94626	4.87737	4.79541	4.82185	4.84281	4.8579	4.8667	4.86879	4.86371	4.85099	4.83013	4.80062	4.76191	4.68397
440	0	0	0	0	0	0	0.10977	0.51226	2.34176	10.5379	46.8352	110.201	125.871	142.312	159.491	177.356	195.833	214.818	234.168	253.693	273.132	292.138	310.234	326.759	340.771	350.872	354.845	348.804	407.008	474.589	552.978	643.802	748.907	870.376	1010.55	1172.04	1357.74	1570.82	1814.73	2050.39	2312.41	2602.42	2921.64	3270.56	3547.12	3830.71	4114.85	4389.31	4608.82
442	0	0	0	0	0	0.494661	0.896366	1.57917	2.72531	4.62983	7.76818	8.51852	9.23784	9.92704	10.587	11.2186	11.8226	24.76	45.2565	67.3784	77.0951	105.536	89.6261	70.6753	87.083	67.0291	58.0648	59.9204	59.2776	58.2289	56.7224	54.701	52.1018	53.3418	54.49	55.5284	56.4367	57.1927	58.669	63.3498	68.2592	73.3795	78.6852	84.1407	81.2644	82.4539	83.033	82.982	81.767
446	0	0	0	0	0	0	0	0	0	0	0	0	0	0	0	0	0	0	0	0	0	0	0	0	0	0	0	0	0	0	0	0	0	0	0	0	0	0	0	0	0	0	0	0	0	0	0	0	0
450	0	0	0	0	0	0.134762	0.230727	0.380664	0.607451	0.935557	1.37425	3.02394	6.57512	14.1548	30.2129	64.0074	134.697	281.728	585.893	908.859	1246.53	1806.79	2379.06	2953.19	3516.91	4602.84	5521.67	6340.68	6500.46	6631.38	6766.88	6907.52	7053.93	7206.85	7367.18	7535.97	7714.51	7904.37	8107.48	8326.26	8563.79	8824.06	9112.33	9435.72	9804.14	10231.9	10740.5	11364.5	12087.2
454	0	0	0	0	0	0.543547	0.82074	1.20506	1.73354	2.45527	3.43523	4.69414	6.34333	8.49419	11.2883	14.9056	19.5739	25.5822	33.2954	41.5308	50.4812	63.8731	78.3661	93.9613	110.66	128.462	145.361	163.2	168.006	173.475	179.24	185.335	191.797	198.671	206.01	213.876	222.346	231.511	241.487	252.417	264.482	277.918	293.038	310.265	330.195	353.69	382.066	417.453	460.686
458	0	0	0	0	0	0.120092	0.171064	0.234658	0.310997	0.396925	0.480556	0.79171	1.28864	2.07622	3.31583	5.25446	8.26792	12.9244	20.0772	21.8127	23.4856	28.5433	33.518	38.2653	42.5973	46.2559	55.5718	62.3147	64.493	66.6259	68.7062	70.726	72.6768	74.549	76.3322	78.0149	79.584	81.0248	84.2668	87.3015	90.0969	92.616	94.8145	120.799	145.222	167.757	187.993	201.673	223.265
462	0	0	0	0	0	0.00019445	0.000276978	0.00037994	0.000503526	0.000642616	0.000777934	0.00128162	0.00208601	0.00336084	0.00536731	0.00850515	0.0133825	0.0209188	0.0324945	0.0501656	0.076964	0.117306	0.177516	0.266436	0.395956	0.580968	0.837269	1.17283	1.19476	1.21624	1.23719	1.25749	1.27704	1.29571	1.31336	1.32983	1.34492	1.35842	1.37008	1.42581	1.48109	1.53528	1.58756	1.6369	1.77537	1.91739	2.05972	2.19725	2.30737
466	0	0	0	0	0	0.878809	2.68664	7.77524	21.5178	57.3503	147.979	197.256	259.982	339.484	439.868	566.188	724.657	922.909	1170.3	1365.38	1583.12	1868.78	2189.12	2591.74	3138	3695.35	4678.63	5792.06	5997.09	6168.36	6346.53	6532.22	6726.16	6929.2	7142.31	7366.65	7603.62	7854.85	8122.37	8408.65	8716.8	9050.75	9415.63	9818.23	10267.8	10777.6	11367	12066.4	12846.1
470	0	0	0	0	0	0	0	0	0	0	0	0	0	0	0	0	0	0	0	0	0	0	0	0	0	0	0	0	0	0	0	0	0	0	0	0	0	0	0	0	0	0	0	0	0	0	0	0	0
474	0	0	0	0	0	0	0	0	0	0	0	0	0	0	0	0	0	0	0	0	0	0	0	0	0	0	1.05687	0.72773	0.88135	1.06661	1.28989	1.55884	1.88264	2.27227	2.74088	3.3042	3.98104	4.79394	5.83379	6.28833	6.77164	7.28531	7.83101	7.67391	7.75222	7.78952	7.77862	7.71143	7.53155
478	0	0	0	0	0	8.35462e-09	2.67348e-08	8.31749e-08	2.53485e-07	7.60456e-07	2.2532e-06	5.75608e-06	1.45417e-05	3.64037e-05	9.04439e-05	0.000223267	0.000548127	0.00133927	0.00325867	0.00729636	0.0162385	0.0368	0.0827725	0.193107	0.44092	0.99011	2.40857	5.73	11.7394	23.9474	48.8566	99.6911	203.456	415.321	848.039	1732.16	3539.37	7235.36	14798.8	15148.2	15517.7	15910.6	16331.4	16786.1	17282.6	17832	18450.5	19163	19885.4
480	0	0	0	0	0	0	0	0	0	0	0	0	0	0	0	0	0	0	0	0	0	0	0	0	0	0	2.1355	2.90544	3.60807	4.47983	5.56129	6.90268	8.56624	10.6291	13.1866	16.3572	20.2871	25.1576	31.193	38.6713	47.936	76.3955	65.6399	60.1818	56.5616	57.7556	53.1201	46.6042	39.3875
484	0	0	0	0	0	0	0	0	0	0	0	0	0	0	0	0	0	0	0	0	0	0	0	0	0	0	4253.98	8855.22	9535.62	10205	10863.1	11509.8	12144.9	12768.3	13379.8	13979.3	14566.8	15142.1	15705.1	16256	16794.4	17320.6	17834.3	18335.7	18824.8	19301.4	23450.8	26685.2	30115.9
492	0	0	0	0	0	0	0	0	0	0	0	0	0	0	0	0	0	0	0	0	0	0	0	0	0	0	0	0	0	0	0	0	0	0	0	0	0	0	0	0	0	0	0	0	0	0	0	0	0
496	0	0	0	0	0	447.767	736.939	1180.87	1857.58	2885.55	4447.71	5253.3	6136.15	7102.48	8159.01	9312.97	10572.2	11945	13440.6	15256.3	17230.9	24216.4	32136.7	36729.1	27828	29810	31875.4	34027.2	35169.2	36667.8	38223.8	39839.3	41516.5	43257.4	45064.6	46940.2	48886.8	50906.9	53003.1	55178.2	57758.4	60928.1	64263.5	67773.2	71465.9	76086.2	86763.9	98928.8	112082
498	0	0	0	0	0	1.26792	1.68716	2.16277	2.68026	3.20264	3.64132	4.28918	4.99205	5.75193	6.57041	7.44843	8.38615	9.38259	10.4353	11.5396	12.632	19.3323	29.4048	29.6158	29.5974	39.0701	47.7713	61.2654	40.5655	44.1132	47.9504	52.0981	56.5786	61.4155	66.6331	72.2574	78.3148	84.833	91.8403	99.3657	107.438	116.086	125.339	135.223	145.762	156.98	168.892	181.509	193.615
500	0	0	0	0	0	5.03121e-08	1.14714e-07	2.51924e-07	5.34676e-07	1.09345e-06	2.12438e-06	4.66869e-06	1.01373e-05	2.17899e-05	4.64297e-05	9.8173e-05	0.000206142	0.000430074	0.000891804	0.00183828	0.00376672	0.00767062	0.0155171	0.0311571	0	0	0	0.449706	0.487769	0.528771	0.572903	0.62036	0.671342	0.726054	0.7847	0.847484	0.914601	0.98624	1.06257	1.09233	1.12178	1.15074	1.17901	1.20632	1.23377	1.25966	1.28356	1.30495	1.31488
504	0	0	0	0	0	17.7254	33.7148	61.8594	110.53	193.518	333.408	399.409	473.159	555.427	647.05	748.942	862.1	987.609	1126.65	1304.17	1494.81	1501.13	1499.32	1760.87	1654.87	1444.35	2264.95	1838.55	1946.89	2057.49	2170.35	2285.46	2402.82	2522.45	2644.33	2768.48	2894.89	3023.57	3154.51	3287.72	3922.47	4571.12	5233.66	5910.11	6600.49	7304.8	8023.06	8755.27	9442.06
508	0	0	0	0	0	0.0186812	0.0627688	0.142407	0.337684	0.868365	2.58968	3.52184	4.75166	6.3749	8.52018	11.3614	15.1355	20.1681	26.9112	45.9983	71.6023	125.944	200.355	302.523	443.805	641.441	1011.46	6175.33	6979.11	7835.26	8745.09	9709.91	10731	11809.7	12947.3	14145	15404.3	16726.3	18112.5	19564	21094.6	22821.1	24648.8	26576.5	27349.6	28087.9	28782.3	29422.5	29809.6
512	0	0	0	0	0	3.35477	6.39824	11.7625	21.0487	36.8963	63.6286	73.8044	84.6563	96.2203	108.534	121.636	135.568	150.372	166.095	176.69	187.342	198.05	208.815	219.635	230.511	241.441	296.6	355.677	365.86	376.19	386.666	397.289	408.058	418.973	430.035	441.244	452.6	464.103	475.753	487.551	506.974	527.961	549.747	572.361	595.833	619.293	659.078	701.339	741.562
516	0	0	0	0	0	0.0247131	0.118623	0.384466	1.30239	4.78446	20.3835	26.4658	34.0912	43.6668	55.7196	70.937	90.2236	114.781	146.224	186.748	239.376	308.344	399.683	522.16	688.82	919.608	1246.01	6809.01	7788.47	8860.46	10032.6	11313	12710.5	14234.7	15895.8	17705	19674	21815.9	24144.3	26674.4	29422.1	30022.8	30591.4	31121.9	31607.7	32041.4	32414.9	32719.2	32738.8
520	0	0	0	0	0	0	0	0	0	0	0	0	0	0	0	0	0	0	0	0	0	0	0	0	0	0	0	0	0	0	0	0	0	0	0	0	0	0	0	0	0	0	0	0	0	0	0	0	0
524	0	0	0	0	0	0.0693173	0.207952	0.606526	1.73293	4.87387	13.5385	31.5614	35.7328	40.0474	44.4925	49.0509	53.7005	58.4121	63.1486	67.3931	71.4068	77.5278	83.2824	88.4825	92.8829	96.1478	116.412	132.28	135.806	139.269	142.66	145.969	149.186	152.299	155.296	158.164	160.889	163.452	165.838	168.026	172.416	178.112	59.0176	77.5569	101.759	135.341	179.537	230.783	308.722
528	0	0	0	0	0	0.550738	1.33064	3.12567	7.19234	16.2914	36.446	37.302	37.7551	37.867	37.6921	37.2779	36.666	71.6703	217.589	412.658	508.997	819.397	767.2	1048.94	904.724	1177.65	1420.15	1861.38	1770.32	1671.44	1564.55	1449.46	1325.98	1303.55	1278.37	1250.37	1219.5	1185.68	1154.65	1120.84	1168.51	1215.84	1239.78	1265.12	1287.56	1344.35	1397.88	1450.83	1500.86
530	0	0	0	0	0	0	0	0	0	0	0	0	0	0	0	0	0	0	0	0	0	0	0	0	0	0	0	0	0	0	0	0	0	0	0	0	0	0	0	0	0	0	0	0	0	0	0	0	0
533	0	0	0	0	0	0	0	0	0	0	0	0	0	0	0	0	0	0	0	0	0	0	0	0	0	0	0.016804	0.0348058	0.037971	0.0414169	0.0451678	0.0492504	0.0536934	0.058528	0.0637882	0.0695109	0.0757359	0.0825068	0.0898705	0.0934787	0.0972188	0.101096	0.105114	0.120527	0.148623	0.243907	0.295042	0.381955	0.374499
540	0	0	0	0	0	0.033567	0.0855657	0.210105	0.501963	1.17439	2.70259	3.36726	4.14878	5.06515	6.13698	7.3878	8.84449	10.5377	12.5025	14.7788	17.4119	20.4537	23.963	28.0069	32.6616	38.0136	44.1614	51.2168	54.6468	58.2963	62.1791	66.3096	70.7031	75.3759	80.3452	85.6295	91.248	97.2213	103.571	110.628	118.149	126.165	134.709	143.813	150.449	157.372	164.595	172.131	178.866
548	0	0	0	0	0	0	0	0	0	0	0	0	0	0	0	0	0	0	0	0	0	0	0.0165287	0.025929	0.0405866	0.063403	0.0988641	0.153898	0.164109	0.174968	0.186514	0.198789	0.211838	0.225708	0.240449	0.256115	0.272762	0.29045	0.309242	0.33012	0.35236	0.37605	0.401282	0.428154	0.447652	0.467982	0.489179	0.511277	0.530976
554	0	0	0	0	0	0	0	0	0	0	0	0	0	0	0	0	0	0	0	0	0	0	50.7612	66.7441	70.0537	293.521	537.067	800.84	761.988	764.588	767.067	769.427	771.671	773.8	775.817	777.723	779.521	781.211	782.797	924.143	1090.87	1287.5	1519.39	1792.82	2115.2	2495.26	3363.73	4250.59	5123.61
558	0	0	0	0	0	0	0	0	0	0	0	0	0	0	0	0	0	0	0	0	0	0	0	0	0	0	105.111	72.3763	80.4991	89.4671	99.3635	110.279	122.314	135.577	150.187	166.274	183.98	203.462	227.383	253.853	313.135	379.935	460.578	463.198	462.098	493.976	526.17	556.4	579.649
562	0	0	0	0	0	36.9193	57.8958	88.1551	131.297	192.174	277.262	353.172	444.868	555.277	687.831	846.553	1036.16	1262.17	1531.04	1708.97	1896.03	2141.93	2401.55	2789.08	3117.6	3557.6	4313.49	5114.57	5276.3	5388.91	5505.01	5624.93	5749.05	5877.82	6011.75	6151.44	6297.63	6451.18	6613.14	6784.8	6967.75	7164.04	7376.3	7607.99	7863.84	8150.48	8477.65	8860.39	9265.4
566	0	0	0	0	0	48.6299	77.6228	119.344	177.341	253.961	345.619	506.426	733.172	1050.76	1492.86	2104.74	2946.9	4099.68	5668.89	7013.35	8385.98	9152.69	9880.3	11167.3	12360.2	13401.3	16577.3	20295.3	20594.7	20798.1	20999.4	21198.6	21396	21591.6	21785.8	21978.9	22171.5	22364	22557.4	22752.8	22951.6	23156.2	23369.2	23595	23839.6	24112	24426.3	24805.8	25132.8
570	0	0	0	0	0	0	0	0	0	0	0.000114468	0.000189668	0.000310658	0.000503981	0.000811026	0.00129609	0.0020587	0.00325241	0.00511337	0.00800353	0.0124759	0.0193727	0.0299719	0.0462064	0.0709872	0.108681	0.165804	0.25203	0.268082	0.285099	0.303139	0.32226	0.342523	0.363994	0.386742	0.410839	0.436364	0.463395	0.49202	0.523778	0.557497	0.593292	0.631287	0.671612	0.714405	0.75981	0.791851	0.825123	0.854296
574	0	0	0	0	0	0	0	0	0	0	0	0	0	0	0	0	0	0	0	0	0	0	0	0	0	0	0	0	0	0	0	0	0	0	0	0	0	0	0	0	0	0	0	0	0	0	0	0	0
578	0	0	0	0	0	0.0521923	0.0594804	0.130563	0.346131	0.707018	6.85167	8.27863	9.80085	11.4057	13.0795	14.8067	16.5704	18.3513	20.1273	21.8728	23.5577	32.33	41.0958	48.4137	24.0072	47.0344	56.6137	63.6976	66.0377	68.4185	70.8358	73.2846	75.7587	78.2509	80.7526	83.2534	85.7412	88.2015	90.6169	98.2265	110.334	122.597	137.316	152.792	164.581	171.478	178.291	193.104	196.91
580	0	0	0	0	0	0	0	0	0	0	0	0	0	0	0	0	0	0	0	0	0	0	0	0	0	0	0	0	0	0	0	0	0	0	0	0	0	0	0	0	0	0	0	0	0	0	0	0	0
583	0	0	0	0	0	0	0	0	0	0	0	0	0	0	0	0	0	0	0	0	0	0	0	0	0	0	0	0	0	0	0	0	0	0	0	0	0	0	0	0	0	0	0	0	0	0	0	0	0
584	0	0	0	0	0	0	0	0	0	0	0	0	0	0	0	0	0	0	0	0	0	0	0	0	0	0	0	0	0	0	0	0	0	0	0	0	0	0	0	0	0	0	0	0	0	0	0	0	0
585	0	0	0	0	0	0	0	0	0	0	0.00871242	0.0121918	0.0168717	0.0231358	0.0314856	0.0425744	0.0572521	0.0766232	0.102121	0.135602	0.179472	0.236838	0.311716	0.409289	0.536237	0.701167	0.915158	1.19246	1.27215	1.35693	1.44712	1.54305	1.64507	1.75357	1.86893	1.99159	2.12199	2.26061	2.40795	2.57167	2.74616	2.9321	3.13025	3.34137	3.4951	3.65548	3.82277	3.99726	4.15313
586	0	0	0	0	0.0287594	0.119831	0.479323	1.86403	7.10107	26.629	98.626	236.668	274.671	318.07	363.287	409.949	457.643	529.33	602.836	697.292	792.592	839.891	883.233	889.103	1005.62	1058.19	1343.84	1587.65	1610.28	1648.94	1687.76	1726.7	1765.69	1804.67	1843.56	1882.28	1920.74	1958.84	1996.47	2033.48	2069.76	2105.12	2139.39	2172.37	2203.82	2233.48	2261.04	2286.16	2294.01
591	0	0	0	0	0	0	0	0	0	0	0	0	0	0	0	0	0	0	0	0	0	0	0	0	0	0	47.23	32.5211	35.5364	38.8024	42.3385	46.1653	50.305	54.7815	59.6201	64.8482	70.495	76.5921	84.0953	97.9349	113.94	132.438	153.803	167.817	179.087	184.389	200.498	216.435	253.051
598	0	0	0	0	0	4.12641	7.05348	11.611	18.4666	28.2839	41.0961	47.2871	53.7561	60.4908	67.4731	74.6776	82.0698	89.6035	97.2178	104.832	112.341	119.604	126.431	132.563	137.634	141.105	142.126	139.219	139.734	140.155	140.474	140.684	140.778	140.748	140.582	140.272	139.803	139.161	138.331	137.293	136.024	134.498	132.681	130.534	127.836	124.7	121.046	116.759	110.978
600	0	0	0	0	0	0	0	0	0	0	0	0	0	0	0	0	0	0	0	0	0	0	0	0	0	0	687.31	716.797	764.201	812.751	862.454	913.316	965.345	1018.54	1072.92	1128.49	1185.24	1243.2	1428.39	1618.23	1812.76	2011.99	2215.95	2334.86	2456.22	2580.04	2706.33	2835.1	3683.13
604	0	0	0	0	0	0	0	0	0	0	0	0	0	0	0	0	0	0	0	0	0	0	0	0	0	0	1001.37	1591.71	1634.46	1677.11	1719.66	1762.08	1804.36	1846.5	1888.47	1930.27	1971.89	2013.31	2077.31	2141.13	2592.72	3081.61	3659.46	3987.34	4250.58	4715.36	5792.3	6388.48	6420.51
608	0	0	0	0	0	2.09712	2.86774	3.77652	4.80495	5.88735	6.84297	7.51586	8.15559	8.76009	9.32697	9.8535	10.3365	10.7721	11.156	11.4827	11.7454	21.4844	31.3117	40.9777	50.1623	58.4321	89.8689	131.247	139.392	147.439	155.365	163.145	170.753	178.159	185.329	192.229	198.816	205.046	210.868	216.222	246.072	290.937	343.174	403.961	460.688	510.841	555.156	603.94	688.874
612	0	0	0	0	0	0	0	0	0	0	0	0	0	0	0	0	0	0	0	0	0	0	0	0	0	0	0	0	0	0	0	0	0	0	0	0	0	0	0	0	0	0	0	0	0	0	0	0	0
616	0	0	0	0	0	1.87864	3.56808	6.52622	17.2993	28.2629	136.889	165.386	195.782	245.346	298.547	275.981	248.156	344.831	446.414	516.942	587.552	716.535	1084.53	1688.53	1673.5	1871.78	2249.74	2524.66	2631.35	2755.8	2884.02	3015.88	3151.17	3289.62	3430.88	3574.5	3719.93	3866.47	4013.24	4159.16	4362.9	4658.27	4962.23	5589.67	6171.13	7075.81	7890.2	8228.26	8406.22
620	0	0	0	0	0	5.67595	9.70268	15.9732	25.407	38.9213	56.573	69.0447	74.9274	80.488	85.7048	81.4976	76.0026	79.2175	82.0544	105.593	129.642	164.729	199.525	277.47	198.106	283.58	435.433	420.093	546.957	565.013	576.717	588.217	599.464	611.244	622.644	633.591	643.998	653.769	661.326	668.198	696.143	725.353	733.27	774.33	821.67	870.228	930.78	964.268	1000.67
624	0	0	0	0	0	0.245141	0.467639	0.859848	1.53886	2.69773	4.65267	5.96216	7.55532	9.48706	11.8223	14.6376	18.0233	22.0861	26.9512	32.7663	39.705	47.9713	57.8045	69.4859	83.3451	99.7687	119.21	142.198	146.359	150.712	155.277	160.077	165.136	170.486	176.162	182.206	188.67	195.615	203.116	211.269	220.193	230.041	241.016	253.39	267.541	284.014	303.63	327.698	356.243
626	0	0	0	0	0	0.0647359	0.093835	0.131718	0.180228	0.241199	0.31606	0.438729	0.602185	0.818933	1.10513	1.48158	1.97508	2.62002	3.46055	4.55316	5.97014	7.80376	10.1718	13.2241	17.1514	22.1961	28.6659	36.9504	38.1005	39.2796	40.4882	41.727	42.9967	44.2979	45.6315	46.9981	48.3985	49.8334	51.3036	56.3584	61.9029	67.9838	74.6524	81.9649	86.3831	91.0285	95.9124	101.047	105.778
630	0	0	0	0	0	0	0	0	0	0	0	0	0	0	0	0	0	0	0	0	0	0	0	0	0	0	1.12222	1.71768	2.22357	2.87794	3.72426	4.81866	6.23367	8.06293	10.4274	13.4833	17.4321	22.5343	29.1258	37.6403	45.0669	52.3603	65.2207	78.852	93.7242	108.625	123.015	138.821	168.427
634	0	0	0	0	0	0.0263525	0.0498591	0.0911195	0.162313	0.283489	0.487445	0.56525	0.648195	0.736549	0.830597	0.930637	1.03698	1.14995	1.26989	1.39715	1.53212	1.67518	1.82674	1.98722	2.15709	2.33679	2.52684	6.63271	7.05902	7.51144	7.9915	8.50084	9.0412	9.6144	10.2224	10.8672	11.551	12.2761	13.0449	13.8768	14.7599	15.6972	16.6919	17.7474	18.1283	18.5151	18.9081	19.3072	19.5893
638	0	0	0	0	0	0.00139628	0.00238669	0.00392872	0.00624811	0.00956917	0.013902	0.019086	0.0258879	0.0347579	0.0462582	0.0610858	0.0800982	0.10434	0.135069	0.173774	0.222178	0.28221	0.355907	0.44519	0.551398	0.674305	0.810015	0.94595	1.13541	1.36186	1.63227	1.95482	2.33914	2.7965	3.34002	3.98494	5.07934	6.15054	7.13353	8.04456	8.70311	10.01	10.3263	15.2056	16.5475	15.9255	14.2377	14.1352	13.465
642	0	0	0	0	0	2.9611	5.96194	11.6705	40.2816	76.0348	136.08	146.24	155.417	143.213	128.296	122.128	114.663	258.87	505.856	861.072	1103.48	1665.38	1540.05	1785.19	1796.36	2168.06	1840.54	2326.72	2605.09	2593.59	2560.63	2502.74	2416.04	2506.96	2595.54	2680.74	2761.41	2836.22	2955.67	3074.75	3305.06	3396.18	3482.07	3598.98	3692.47	3764.61	3811.41	3842.53	3900.06
643	0	0	0	0	0	5.88073	16.4663	44.8259	119.541	313.816	813.693	2046.65	2468.63	2918.96	3395.07	3597.62	3796.79	4330.15	4920.33	5426.2	5920.47	9024.82	13659	14147.3	14020.1	17675	21239.4	22502.2	25498.4	28476.7	31429.8	34349.6	37227.3	40053.4	42817.4	45507.9	48111.9	50615.2	53001.4	55943	59062.1	68938.3	73466.4	82738.9	87687.4	98255.9	109375	118218	139464
646	0	0	0	0	0	0.121812	0.186934	0.277238	0.399572	0.560568	0.763715	1.2296	1.9572	3.08613	4.82787	7.50167	11.588	17.8081	27.2415	35.6639	44.6542	56.4917	68.9787	82.0536	95.6502	109.697	123.668	137.907	141.171	144.385	147.72	151.187	154.8	158.577	162.536	166.7	171.099	175.763	180.734	186.063	191.811	198.058	204.91	212.505	221.033	230.766	242.104	255.677	270.843
654	0	0	0	0	0	5.65753e-05	0.000107855	0.00019822	0.000354626	0.00062151	0.00107165	0.00150198	0.00208172	0.00285898	0.00389664	0.00527678	0.00710632	0.00952442	0.0127118	0.0169032	0.0224025	0.0296035	0.0390153	0.0512957	0.0672939	0.0881051	0.115141	0.150218	0.190329	0.241109	0.305385	0.386732	0.489669	0.619908	0.784668	0.993071	1.25664	1.58994	2.01136	2.54413	3.2176	4.06882	5.14458	6.50396	7.30803	8.21054	8.95865	9.72116	8.19474
659	0	0	0	0	0	0	0	0	0	0	0	0	0	0	0	0	0	0	0	0	0	0	0	0	0	0	0.567474	1.15811	1.24485	1.33785	1.43756	1.54444	1.65901	1.78179	1.91337	2.05437	2.20543	2.36726	2.54062	2.60376	2.66812	2.73371	2.92004	2.88593	3.37583	3.48097	3.68646	3.65262	3.6759
660	0	0	0	0	0	0	0	0	0	0	0	0	0	0	0	0	0	0	0	0	0	0	0	0	0	0	0	0	0	0	0	0	0	0	0	0	0	0	0	0	0	0	0	0	0	0	0	0	0
662	0	0	0	0	0	0	0	0	0	0	0	0	0	0	0	0	0	0	0	0	0	0	0	0	0	0	0.0575055	0.0640136	0.0688079	0.0739485	0.0794597	0.0853677	0.0917002	0.0984871	0.10576	0.113553	0.121903	0.130849	0.140431	0.143921	0.147478	0.151104	0.154799	0.158565	0.162583	0.166684	0.170869	0.175138	0.178373
666	0	0	0	0	0	0	0	0	0	0	0	0	0	0	0	0	0	0	0	0	0	0	0	0	0	0	0	0	0	0	0	0	0	0	0	0	0	0	0	0	0	0	0	0	0	0	0	0	0
670	0	0	0	0	0	0	0	0	0	0	0	0	0	0	0	0	0	0	0	0	0	0	0	0	0	0	0.152086	0.31038	0.333626	0.358551	0.385273	0.413919	0.444623	0.47753	0.512795	0.550582	0.591068	0.63444	0.680901	0.697823	0.715071	0.73265	0.750567	0.768827	0.788312	0.808195	0.828484	0.849186	0.86487
674	0	0	0	0	0	0.00646395	0.0156176	0.0366857	0.0844157	0.19121	0.427763	0.469082	0.508692	0.546643	0.582984	0.617762	0.651022	1.36344	2.4921	3.71027	4.24533	5.81143	4.93536	3.89181	4.79532	3.69103	3.1974	3.29958	3.25025	3.17913	3.08367	2.96108	2.80835	2.86291	2.91206	2.95489	2.99041	3.01753	3.03461	3.04074	3.03449	3.0143	2.97847	2.92514	2.85227	2.75767	2.63892	2.49343	2.30387
678	0	0	0	0	0	0	0	0	0	0	0	0	0	0	0	0	0	0	0	0	0	0	0	0	0	0	0	0	0	0	0	0	0	0	0	0	0	0	0	0	0	0	0	0	0	0	0	0	0
682	0	0	0	0	0	0.0887249	0.199631	0.436693	0.93577	1.97389	4.11227	6.69312	10.773	17.1825	27.1983	42.7767	66.9088	87.6159	114.206	138.793	166.731	227.735	309.852	420.085	482.695	646.343	947.598	1095.86	1393.35	1771.28	2251.29	2860.88	3634.89	4617.52	5864.82	7447.84	9456.64	12005.4	15238.7	19340.1	25218.9	32532.5	41961.8	43312.1	44700.6	46632.4	48779.6	51019.9	53023.7
686	0	0	0	0	0	7.84986	11.9274	17.4528	24.6738	33.5933	43.3902	59.5723	80.8056	108.496	144.401	190.697	250.065	325.77	421.745	542.65	693.885	881.496	1111.89	1391.14	1723.57	2108.71	2534.89	2963.95	3007.28	3050.96	3095.02	3139.5	3184.47	3229.98	3276.1	3322.94	3370.6	3419.21	3468.96	3520.07	3572.82	3627.6	3684.92	3745.52	3810.43	3881.21	3960.36	4171.75	4952.29
690	0	0	0	0	0	0	0	0	0	0	0	0	0	0	0	0	0	0	0	0	0	0	0	0	0	0	0	0	0	0	0	0	0	0	0	0	0	0	0	0	0	0	0	0	0	0	0	0	0
694	0	0	0	0	0	0.0298931	0.0500514	0.0810323	0.127963	0.198232	0.302435	0.376627	0.463811	0.565983	0.685424	0.824741	0.986908	1.17532	1.39385	1.6469	1.93949	2.27736	2.66699	3.11579	3.63217	4.22569	4.9072	5.68902	6.40699	7.21432	8.12201	9.1424	10.2893	11.5783	13.0268	14.6543	16.4828	18.5368	20.8438	23.4348	26.3444	29.6114	33.2794	37.397	58.8267	92.5253	145.511	228.814	357.518
702	0	0	0	0	0	0	0	0	0	0	0	0	0	0	0	0	0	0	0	0	0	0	0	0	0	0	0	0	0	0	0	0	0	0	0	0	0	0	0	0	0	0	0	0	0	0	0	0	0
703	0	0	0	0	0	1.77659	3.57704	7.00203	13.4267	25.344	47.2484	50.8268	54.0704	56.9993	59.6325	61.988	64.083	131.657	236.066	387.482	482.772	777.179	862.425	999.705	1005.96	910.584	1159.54	1062.43	1034.79	1000.79	959.842	911.339	854.63	861.457	866.41	869.284	869.859	867.897	877.07	901.473	924.648	946.298	966.09	983.655	979.178	971.524	960.397	945.478	917.189
704	0	0	0	0	0	1.92044	2.9334	4.3181	6.14676	8.4364	11.0061	13.016	15.2085	17.591	20.1698	22.9488	25.9291	29.1078	32.4764	35.3233	38.0836	50.3931	62.7068	74.7186	86.0389	96.1478	116.412	132.28	145.637	158.963	172.231	185.412	198.477	211.395	224.13	236.644	248.898	260.845	272.438	283.622	315.807	347.099	377.34	406.349	433.923	516.934	596.054	670.563	734.971
705	0	0	0	0	0	1.08778	2.08709	3.89321	7.11409	12.7965	22.7336	25.3358	27.9229	30.4951	33.0524	35.5949	38.1227	81.1414	150.728	228.062	265.204	368.954	318.441	255.201	319.572	249.988	220.084	230.818	224.816	217.428	208.532	197.994	185.674	187.157	188.233	188.857	188.982	188.556	192.761	200.597	208.523	216.512	224.534	232.551	251.295	271.152	292.12	314.178	335.182
706	0	0	0	0	0	72.3198	125.894	212.274	348.984	561.383	884.758	1054.01	1241.58	1449.09	1678.28	1931.03	2209.36	2515.44	2851.57	3169.49	3501.07	4395.15	5349.24	6361.25	7428.99	8550.2	9391.07	10259.6	10510	10763.3	11019.2	11277.9	11539.4	11803.5	12070.4	12339.9	12612.1	12887	13164.6	13444.8	14383.8	15139.5	15932.9	16765.8	17825.6	18950.2	20143.4	21409.2	22609.8
710	0	0	0	0	0	0	0.0199187	0.0645581	0.218692	0.803389	3.42272	4.59728	6.12606	8.11735	10.7151	14.1118	18.5675	24.4358	32.2032	42.1204	54.8369	78.9176	111.113	154.459	213.419	294.75	433.794	3152.93	3383.95	3610.21	3831.34	4046.95	4256.67	4460.12	4656.91	4846.68	5029.04	5203.61	5370.01	5527.87	5676.8	5388.88	6166.15	7377.01	9477.08	18129.4	21462.5	28801.4	36842.9
716	0	0	0	0	0	0	0	0	0.104097	0.234219	0.748391	1.03393	1.41712	1.93141	2.62234	3.55231	4.80746	6.50765	8.82126	12.3316	16.9158	20.2867	24.4826	29.7791	36.5746	90.9228	124.447	682.765	759.673	842.17	929.845	1023.17	1122.71	1229.09	1343.07	1465.54	1597.59	1740.5	1895.87	2065.67	2252.42	2278.54	2309.4	2346.6	2392.44	2450.32	2525.56	2626.88	2752.62
724	0	0	0	0	0	11.9002	28.5605	66.6412	152.323	342.726	810.246	935.77	1066.38	1097.61	1117.42	1059.81	983.256	1073.7	1165	1256.53	1347.54	1567.79	1972.49	2755.36	2058.92	2464.37	3239.67	3035.33	3453.42	3577.46	3704.82	3835.53	3969.6	4107.06	4247.89	4392.09	4539.65	4690.53	4844.69	5002.05	5367.94	5379.63	5893.5	6513.6	6879.94	7261.69	7608.69	7783.06	8290.23
732	0	0	0	0	0	0	0	0	6.34469e-06	1.42756e-05	2.97407e-05	6.23243e-05	0.000129159	0.000265237	0.000540565	0.00109464	0.00220449	0.00441849	0.00881916	0.0175381	0.034763	0.0687039	0.135426	0.26631	0.522556	1.02334	2.00041	3.90386	4.96143	6.30441	8.00955	10.1742	12.9218	16.4089	20.8338	26.448	33.5702	42.6043	54.0621	68.9379	87.8953	112.051	142.828	143.511	145.726	147.758	149.559	151.071	151.264
736	0	0	0	0	0	63.3157	151.958	354.568	810.441	1823.49	6779.36	15659	17567.6	19510.4	21479.8	23466.7	25459.7	27444.8	29404.8	32639.4	35830.9	37702.8	39369.5	42825.2	45906.6	48429.9	50522.4	51336.5	51899.9	52384.8	52862.1	53331.9	53794.2	54249.2	54697.4	55139.1	55575.2	56006.7	56435	56862.2	57291.1	57725.8	58172.2	58638.7	59137.8	59688.8	60321.9	61087.6	61687.3
740	0	0	0	0	0	0	0	0	0	0	0	0	0	0	0	0	0	0	0	0	0	0	0	0	0	0	0.167932	0.252289	0.285705	0.323308	0.365599	0.41314	0.466557	0.52655	0.593896	0.669465	0.754225	0.849256	0.966358	1.07885	1.20326	1.34077	1.49268	1.51497	1.58711	1.65381	1.71267	1.76076	1.78338
744	0	0	0	0	0	0	0	0	0	0	0	0	0	0	0	0	0	0	0	0	0	0	0	0	0	0	0	0	0	0	0	0	0	0	0	0	0	0	0	0	0	0	0	0	0	0	0	0	0
748	0	0	0	0	0	0	0.00260795	0.00633942	0.0161062	0.044376	0.141793	0.171979	0.206942	0.247614	0.295153	0.351017	0.417053	0.49563	0.589824	0.771465	1.00438	1.44543	2.03512	2.82902	3.90892	5.39855	7.94525	57.7482	73.5579	86.828	101.999	119.315	139.05	161.509	187.035	216.012	248.869	286.086	328.197	375.803	429.571	454.21	479.512	505.37	531.651	558.193	584.797	611.222	633.2
752	0	0	0	0	0	0.0522566	0.119166	0.261756	0.69465	3.5534	13.8218	16.7094	19.7938	23.0505	26.4531	29.9722	33.5754	37.226	40.8826	44.4975	48.015	57.484	66.8592	136.882	53.7775	62.1129	91.1857	155.282	161.969	165.73	185.275	197.019	203.298	219.781	233.631	241.175	250.495	268.67	272.802	291.994	324.823	350.8	386.387	423.52	457.127	496.892	513.369	542.229	570.234
756	0	0	0	0	0	0.163194	0.492867	1.15774	2.66403	9.05144	50.6233	54.4573	57.9326	61.0707	63.8919	66.4157	68.6604	141.061	252.928	369.031	413.804	740.171	770.023	952.1	862.255	867.223	920.271	1163.6	1119.91	1070.28	1014.33	951.673	881.885	878.402	872.99	865.513	855.828	843.785	853.1	934.094	993.961	1050.95	1107.41	1136.25	1179.77	1220.23	1229.88	1352.11	1476.21
760	0	0	0	8.11631	17.7554	35.7263	68.1624	125.343	224.344	393.315	678.367	1032.29	1553.41	2316.33	1999.5	1714.92	1462.72	1241.64	1049.56	2035.09	1044.57	1165.81	1294.06	1429.35	1199.63	1346.28	1642.79	1724.3	1757.91	1791.81	1826	1860.47	1895.23	1930.27	1965.6	2001.22	2037.12	2073.31	2109.78	2146.54	2263.31	2363.53	2467.86	2576.49	2689.57	3070.24	3458.66	3433.71	3386.13
762	0	0	0	0	0	1.39964	3.91898	10.6683	28.4489	74.6783	193.61	463.689	539.096	620.415	707.745	801.103	900.394	1005.37	1115.56	1205.63	1291.94	1372.55	1505.28	1626.95	1731.66	1811.22	1965.64	2047.1	2196.72	2317.83	2443.82	2574.64	2710.21	2850.36	2994.85	3143.37	3295.47	3450.57	3607.89	3766.46	3925.02	4081.93	4235.12	4381.9	4518.78	4641.14	4742.78	4815.11	4815.58
764	0	0	0	0	0	0.52748	1.65357	2.97083	4.37794	5.72856	13.9048	16.8057	19.9023	23.1698	26.5809	30.1053	33.7095	37.3556	41.0006	44.5946	48.0795	58.726	69.2698	79.4358	88.8722	97.1071	105.816	111.333	112.455	114.718	116.959	119.171	121.348	123.482	125.564	127.586	129.536	131.402	139.465	147.296	154.857	162.106	168.995	192.181	214.463	235.681	255.649	274.145	315.898
768	0	0	0	0	0	1.04845	1.73383	2.7793	4.35343	6.69845	10.161	13.0084	16.4688	20.6603	25.7222	31.8189	39.1442	47.926	58.4331	70.9809	85.9404	103.747	124.913	150.036	179.821	215.089	256.806	306.099	311.281	316.496	321.745	327.026	332.341	337.69	343.072	348.488	353.938	359.422	364.941	372.363	379.885	387.509	395.236	403.067	415.897	429.085	442.639	456.569	467.943
772	0	0	0	0	0	0	0	0	0	0	0	0	0	0	0	0	0	0	0	0	0	0	0	0	0	0	0	0	0	0	0	0	0	0	0	0	0	0	0	0	0	0	0	0	0	0	0	0	0
776	0	0	0	0	0	0	0	0	0	0.0746535	0.0761049	0.0879861	0.100498	0.113625	0.127342	0.141606	0.156359	0.171518	0.18697	0.202561	0.218084	0.233262	0.247715	0.371803	0.552554	0.810759	1.16848	1.63691	1.72338	1.81315	1.90616	2.00236	2.10163	2.20381	2.30869	2.41597	2.52528	2.63612	2.74787	2.86768	2.98725	3.10527	3.22011	3.3296	3.36246	3.38131	3.3822	3.35974	3.28551
780	0	0	0	0	0	0	0	0	0	0	0	0	0	0	0	0	0	0	0	0	0	0	0	0	0	0	0.00168678	0.0034424	0.00512986	0.00764317	0.0113859	0.0169587	0.0252549	0.0376038	0.0559825	0.0833311	0.124022	0.184557	0.2746	0.408519	0.426786	0.476068	0.530975	0.671094	0.808632	1.10851	1.37307	1.70059	2.06784
784	0	0	0	0	0	0.648232	1.23806	2.27839	4.08028	7.15664	12.3478	14.3232	16.4299	18.675	21.0657	23.6097	26.3149	29.1898	32.243	34.301	36.3703	38.4506	40.542	42.6442	44.7574	46.8812	66.4085	87.4686	81.1829	79.9889	78.799	77.6141	76.4348	75.2616	74.0951	72.9358	71.7842	70.6408	69.5059	73.9406	78.6478	83.6438	88.946	94.5726	100.672	107.152	114.036	121.349	128.309
788	0	0	0	0	0	6.35452	13.3313	27.0283	53.4303	103.585	197.739	249.347	307.094	320.433	330.896	338.458	343.093	367.764	466.163	508.799	553.146	555.368	616.201	647.953	543.883	569.522	744.096	621.148	629.973	648.118	667.113	687.048	708.024	730.161	753.6	778.509	805.088	833.581	864.284	897.57	933.904	973.888	1018.31	1068.23	1125.12	1191.08	1269.29	1364.77	1476.9
792	0	0	0	0	9.43309	36.7342	72.9769	117.578	263.651	435.959	632.035	763.542	906.781	920.107	921.072	909.761	886.259	1039.68	1204.53	1407.27	1624.15	1248.48	1544.02	1860.93	1564.95	1756.96	2338.77	2579.87	2644.14	2717.07	2791.54	2867.58	2945.22	3024.49	3105.41	3188.03	3272.37	3358.46	3446.34	3536.04	3710.89	3881.48	4059.41	4244.96	4438.46	4583.9	4726.54	4873.06	4992.16
795	0	0	0	0	0.8229	2.40012	6.72035	18.2943	48.7847	128.06	332.007	795.143	928.325	1073.3	1230.69	1401.05	1584.92	1782.73	1994.81	2138.04	2278.98	2513.07	2747.17	2978.52	3233.31	3568.27	4189.56	4640.8	4997.45	5321.7	5665.72	6030.65	6417.67	6828.06	7263.13	7724.28	8212.99	8730.8	9279.32	9860.27	10475.4	11126.7	11816.1	12545.6	13317.4	14133.9	14997.3	15910.3	16769.9
796	0	0	0	0	0	0	0	0	0	0	0	0	0	0	0	0	0	0	0	0	0	0	0	0	0	0	0	0	0	0	0	0	0	0	0	0	0	0	0	0	0	0	0	0	0	0	0	0	0
798	0	0	0	0	0	0	0	0	0	0	0	0	0	0	0	0	0	0	0	0	0	0	0	0	0	0	0	0	0	0	0	0	0	0	0	0	0	0	0	0	0	0	0	0	0	0	0	0	0
800	0	0	0	0	0	2.78662	4.22823	6.22867	8.97867	12.7301	17.8148	24.9419	34.533	47.3779	64.5082	87.2689	117.411	157.211	209.623	259.913	314.657	390.495	472.611	561.037	655.808	756.958	922.505	1099.47	1125.08	1151.38	1178.6	1206.83	1236.18	1266.76	1298.71	1332.19	1367.41	1404.58	1444.01	1486.02	1531.07	1579.7	1632.64	1690.83	1755.58	1828.73	1912.97	2012.51	2121.07
804	0	0	0	0	0	0.225747	0.632091	1.72069	4.58851	12.0448	31.2274	74.7882	86.9863	100.153	114.31	129.464	145.608	162.71	180.707	199.497	217.947	332.745	504.597	506.284	503.442	660.019	798.963	1008.4	1128.51	1193.02	1260.49	1330.96	1404.47	1481.04	1560.67	1643.33	1728.97	1817.48	1908.72	2031.81	2165.77	2337.68	2426.1	2738.93	3040.61	3529.42	4082.16	4873.17	5835.63
807	0	0	0	0	0	0.767516	1.54533	3.02498	5.80054	10.949	20.412	22.2589	24.0253	25.6968	27.2766	28.7683	30.1751	62.8994	114.429	169.565	193.109	273.863	240.247	195.18	247.18	195.125	202.46	204.751	193.505	186.007	177.311	167.327	155.96	156.249	156.191	155.756	154.91	153.62	163.043	182.423	204.041	228.151	255.032	284.996	328.339	378.166	435.436	501.244	573.241
818	0	0	0	0	0	0	0	0	0	0	0	0	0	0	0	0	0	0	0	0	0	0	0	0	0	0	0	0	0	0	0	0	0	0	0	0	0	0	0	0	0	0	0	0	0	0	0	0	0
826	0	0	0	0	0	0.493516	0.596194	3.15102	10.876	32.2388	132.678	154.586	173.729	193.471	213.827	166.538	114.663	235.336	615.458	1494.58	2344.89	4736.38	6975.22	7524.47	4167.57	4552.92	4601.35	6285.25	6305.96	6258.87	6140.62	5947.66	5676.17	5810.61	5924.49	6016.89	6086.83	6133.23	5987.25	7370.11	8207.89	9586.56	9721.56	10262	11027.1	11951.3	12667.5	13448.1	13983.5
834	0	0	0	0	0	17.6414	28.4952	45.146	70.7045	110.006	170.598	226.74	298.023	388.173	501.782	644.506	823.305	1046.73	1325.29	1639.88	1981.25	3328.29	4802.51	6403.91	8132.48	5505.32	6969.5	8534.08	8764.36	8982.23	9208.58	9362.02	9518.4	9678.03	9841.29	10008.6	10180.5	10357.6	10540.7	10730.8	10929	11137	11356.7	11591	11843.6	12120.3	12429.3	12784.2	13126.2
840	0	0	0	0	0	0	0	0	0	0	0	0	0	0	0	0	0	0	0	0	0	0	0	0	0	0	0	0	0	0	0	0	0	0	0	0	0	0	0	0	0	0	0	0	0	0	0	0	0
850	0	0	0	0	0	0	0	0	0	0	0	0	0	0	0	0	0	0	0	0	0	0	0	0	0	0	1.48628	3.03323	3.39008	3.78826	4.23249	4.72804	5.28076	5.89717	6.58453	7.35091	8.20531	9.15771	10.2192	10.1557	10.0912	10.0258	9.95956	9.89255	9.33824	8.81395	8.31814	7.84933	7.35983
854	0	0	0	0	0	27.775	47.4851	78.1857	124.393	190.637	277.322	345.272	424.71	517.143	624.197	747.595	889.126	1050.59	1233.7	1439.97	1670.49	1925.57	2204.3	2503.66	2817.2	3132.59	3426.9	3656.31	3673.39	3710	3746.06	3781.56	3816.5	3850.87	3884.65	3917.86	3950.51	3982.62	4014.24	4045.44	4076.32	4107.07	4137.94	4169.36	4201.97	4236.84	4275.72	4321.72	4353.26
858	0	0	0	0	0	0	0	0	0	0	0	0	0	0	0	0	0	0	0	0	0	0	0	0	0	0	29.7779	45.6431	49.875	54.4588	59.4216	64.7925	70.6026	76.8852	83.6762	91.0137	98.9391	107.496	118.027	129.455	181.923	252.265	349.496	595.673	811.119	1029.03	1417.96	1749.97	1817.81
860	0	0	0	0	0.811105	2.36572	6.62402	18.0321	48.0855	126.224	327.249	783.746	912.278	1051.27	1201.02	1361.72	1533.42	1715.96	1908.91	2053.82	2193.7	2413.19	2624.82	2823.23	3001.67	3176.48	3556.1	3856.46	4124.67	4371.7	4631.59	4904.84	5191.94	5493.36	5809.58	6141.05	6488.18	6851.36	7230.92	7627.16	8040.27	8470.36	8917.44	9381.35	9861.79	10358.2	10869.9	11395.7	11859.6
862	0	0	0	0	0	0	0	0	0	0	0	0	0	0	0	0	0	0	0	0	0	0	0	0	0	0	423.868	730.115	767.512	806.227	846.292	887.743	930.614	974.94	1020.76	1068.11	1117.02	1167.55	1233.24	1577.07	2014.78	2571.58	3279.34	3812.45	4043.92	4266.54	4516.8	4275.57	3946.57
876	0	0	0	0	0	0	0	0	0	0	0	0	0	0	0	0	0	0	0	0	0	0	0	0	0	0	0	0	0	0	0	0	0	0	0	0	0	0	0	0	0	0	0	0	0	0	0	0	0
882	0	0	0	0	0	0	0	0	0	0	0.000583649	0.000961539	0.00156504	0.00252148	0.00402685	0.00638103	0.0100403	0.0156944	0.0243791	0.0376369	0.0577424	0.0880087	0.133181	0.199893	0.297064	0.435867	0.628152	0.879897	0.92637	0.974608	1.02459	1.07628	1.12962	1.18453	1.24087	1.29851	1.35722	1.41675	1.47676	1.5411	1.60529	1.66863	1.73024	1.78895	1.96452	2.14816	2.33643	2.52354	1.76058
887	0	0	0	0	0	0.00776528	0.0372733	0.173942	0.795165	3.57824	15.9033	41.3762	106.457	271.42	686.771	1726.61	4317.05	4721.61	5140.46	5100.46	5017.83	4715.39	5220.43	5752.58	5625.94	6467.79	7513.6	7058.14	7179.47	7368.08	7560.37	7756.4	7956.23	8159.94	8367.58	8579.23	8794.95	9014.82	9238.91	9467.28	9676.75	9989.21	10310.5	10640.7	10980.3	11532.7	12094.7	12666.3	13164.6
891	0	0	0	0	0	1.69646	4.09883	9.62813	22.1549	50.183	112.266	119.806	127.452	134.355	140.562	146.115	151.053	310.333	556.442	879.524	1062.1	1559.91	3782.35	1178.22	1106.56	1073.19	1113.53	1126.13	1096.26	1058.09	1011.33	955.713	890.957	891.775	889.675	884.56	876.332	864.895	880.332	894.77	908.171	920.496	1136.95	1346.52	1548.83	1743.5	1930.15	2108.41	2263.65
894	0	0	0	0	0	11.3833	19.8658	33.5155	54.9358	87.4898	134.363	169.852	212.216	262.575	322.199	392.515	475.118	571.765	684.368	838.363	999.074	1236.75	1480.66	1726.62	1969.03	2200	2374.68	2506.8	2556.55	2619.74	2685.48	2754.03	2825.69	2900.83	2979.88	3063.35	3151.87	3246.18	3347.21	3456.14	3574.43	3704.03	3847.48	4008.26	4191.28	4403.69	4656.47	4967.56	5335.21
	0	0	0	28.3616	643.516	2451.41	4926.16	9255.74	17191.7	25218.6	51042.5	58094.6	66647.8	73111.1	84873.2	98803.4	115705	131991	152559	179912	200395	257943	301938	323772	321861	358030	419316	497694	505989	527267	545568	567442	597803	625776	656729	703475	740792	768013	827279	867609	930238	989974	1.04639e+06	1.09702e+06	1.11381e+06	1.19153e+06	1.2984e+06	1.42606e+06	1.57668e+06
[truncated: 108 more columns]

## Sheet: upper
ISO1	y-10000	y-9000	y-8000	y-7000	y-6000	y-5000	y-4000	y-3000	y-2000	y-1000	y0	y100	y200	y300	y400	y500	y600	y700	y800	y900	y1000	y1100	y1200	y1300	y1400	y1500	y1600	y1700	y1710	y1720	y1730	y1740	y1750	y1760	y1770	y1780	y1790	y1800	y1810	y1820	y1830	y1840	y1850	y1860	y1870	y1880	y1890	y1900	y1910
4	0	0	0	0	0.150142	0.410307	3.30616	11.4485	32.2994	82.8638	326.787	722.913	1579.01	3103.1	6096.36	11973	11790.4	11257.9	10735	10334.1	9939.37	10310.5	10661.1	7327.24	7704.27	8060.61	9877.69	9678.15	9840.17	9985.48	10132.3	10280.5	10430.2	10581.4	10733.9	10887.9	11043.3	11200.1	11358.2	11517.7	11797.8	12345.5	12917.6	13515.1	14139	15010.5	16113.9	17296.9	18672.1
8	0	0	0	0	0	0	10.8091	21.326	42.0677	82.9669	137.246	142.183	147.255	152.462	157.804	163.28	168.889	318.524	526.295	709.945	738.137	920.469	713.68	514.798	581.224	410.547	326.79	465.344	442.523	417.343	389.87	360.168	328.303	321.362	313.593	305.021	295.666	285.553	286.871	287.909	286.144	296.46	307.057	330.646	352.833	379.352	404.239	434.311	465.135
12	0	0	0	0	0	0	897.618	1770.98	3493.43	6889.83	11724.5	11333.4	10951.8	10579.5	10216.3	9862.06	9516.64	9179.83	8851.47	9474.42	10070.3	9649.17	9235.39	8041.63	6884.8	6890.88	10133.2	7722.17	8005.19	8282.85	8555.13	8822.03	9083.55	9339.68	9590.41	9835.75	10075.7	10310.2	10539.3	10763	12521.8	14248.5	15943.2	17605.7	19236	20834.1	22400	23933.7	25581.8
16	0	0	0	0	0	0	0	0	0	0	0	0	0	0	0	0	0	0	0	0	0	0	0	0	0	0	0	0	0	0	0	0	0	0	0	0	0	0	0	0	0	0	0	0	0	0	0	0	0
20	0	0	0	0	0	0	0.234697	0.463052	0.913417	1.80146	3.76154	3.78605	3.80949	3.8318	3.85291	3.87276	3.8913	3.90845	3.92414	3.9383	3.95085	3.96172	3.97083	3.9781	3.98343	3.98675	3.98796	3.98697	4.1644	4.34944	4.5424	4.7436	4.95338	5.17207	5.40003	5.63764	5.88526	6.14331	6.41219	6.69231	6.98413	7.28809	7.60466	7.93432	8.27757	8.63493	9.00693	9.39412	9.85358
24	0	0	0	0	0	0	0	0	5.50366	10.8544	34.1943	48.484	68.9456	98.3541	140.795	202.318	291.951	423.26	616.816	881.516	1200.55	1561.42	2006.27	2562.54	3433.21	4566.86	5739.34	29022.8	14761.9	15940.9	17142.4	18369.2	19625.1	20914.2	22241.4	23612.6	25034.7	26516.3	28067.8	29702	31435.2	30841.3	30288.7	29787.3	29351.6	29002.2	28771.1	28710.3	29077.4
28	0	0	0	0	0	0	0	0	0	0	0	0	0	0	0	0	0	0	0	0	0	0	0	0	0	0	1.53631	1.47454	1.60408	1.74399	1.89493	2.05756	2.23254	2.42048	2.62198	2.83757	3.06767	3.31257	3.57236	3.84688	4.13558	4.43742	4.45602	4.12984	3.81478	3.59157	3.58137	3.34384	3.10399
31	0	0	0	0	0	0	0	0	99.7671	196.763	452.647	953.656	986	1018.04	1049.52	1080.14	1109.55	1137.3	1162.89	1169.57	1168.95	1656.3	2075.79	2423.79	1796.57	2057.56	2225.22	2277.47	1452.99	1540.47	1632.17	1728.15	1828.42	1932.93	2041.61	2154.3	2270.75	2390.63	2513.46	2638.59	2765.17	2892.05	3017.74	3140.28	3257.07	3364.63	3458.23	3531.26	3594.83
32	0	0	0	0	0	0	0	0	0	0	0	0	0	0	0	0	0	0	0	0	0	0	0	0	0	0	352.087	382.826	422.653	466.614	515.136	568.692	627.803	693.043	765.048	844.515	932.219	1029.01	1578.81	2226.73	3140.49	4429.13	6246.4	8809.12	12963.1	18798.8	25737.2	41642.5	56505
36	0	0	0	0	0	0	0	0	0	0	0	0	0	0	0	0	0	0	0	0	0	0	0	0	0	0	0	0	0	0	0	0	0	0	0	0	3185.37	6317.89	8465.94	10016.8	11101.5	11908.4	13720.1	20131.7	31866.6	45477.5	69360.9	98797.4	134042
40	0	0	0	0	0	0	7.84065	15.4694	30.5149	60.1823	296.673	320.856	344.041	309.886	276.729	244.568	213.405	235.593	256.784	302.158	345.537	435.287	592.1	927.415	567.169	887.526	910.961	1833.97	1885.29	1937.91	1991.87	2047.19	2103.91	2162.05	2221.64	2282.71	2345.28	2409.39	2475.07	2542.34	2611.23	2681.78	2754.01	2737.19	2720.24	2703.16	2685.95	2668.62	2666.45
44	0	0	0	0	0	0	0	0	0	0	0	0	0	0	0	0	0	0	0	0	0	0	0	0	0	0	0.661266	1.0572	1.18994	1.33787	1.50263	1.68601	1.89	2.11681	2.36883	2.64872	2.95943	3.30416	3.68646	3.86802	4.05591	3.84629	3.62391	3.38835	3.47189	3.51787	3.51497	3.44953	3.32426
48	0	0	0	0	0	0	0	0	0.839601	1.65588	2.13462	2.29162	2.45708	2.63086	2.81264	3.00189	3.19779	3.39915	3.6043	3.81093	4.01587	4.21481	4.40177	4.56844	4.70285	4.78719	4.79317	4.67108	4.8026	4.9349	5.06761	5.2003	5.33248	5.46357	5.59289	5.71965	5.84295	5.96169	6.07462	6.18777	6.29203	6.38521	6.46461	6.52689	6.57631	6.59911	6.58811	6.5335	6.45841
50	0	0	0	0	0	0	0.329641	1.08395	5.93948	11.714	38.4966	81.2653	85.3472	90.3138	95.0522	99.5622	103.844	112.892	121.522	133.577	145.062	147.669	150.047	146.888	162.778	169.362	215.223	258.801	263.557	266.767	269.998	273.25	276.522	279.814	283.125	286.455	289.802	293.167	296.549	304.084	311.786	319.657	305.772	318.939	332.646	346.911	361.757	377.204	395.545
51	0	0	0	0	0	0	0	0	3.44534	6.79498	15.6316	32.9334	34.5693	36.2744	38.0503	39.8989	41.8218	43.8205	45.8964	47.4347	48.8577	71.5488	93.0931	113.76	88.5181	108.059	125.987	145.031	151.384	158.006	164.906	172.096	179.587	187.39	195.519	203.986	212.804	221.987	231.548	241.502	251.864	262.65	273.876	285.557	297.712	310.357	323.511	337.192	353.447
52	0	0	0	0	0	0	0	0	0	0	0	0	0	0	0	0	0	0	0	0	0	0	0	0	0	0	0.378703	1.45097	1.41114	1.37231	1.33447	1.29758	1.26162	1.22658	1.19242	1.15913	1.12669	1.09508	1.22391	1.34452	1.45724	1.56239	1.66026	1.70508	1.74584	1.78272	1.81589	1.84551	1.86251
56	0	0	0	0	0	0	15.6294	30.8363	60.8279	119.966	357.313	351.042	344.781	338.53	332.287	313.75	177.688	446.38	789.442	1242.4	1476.27	2761.41	3211.56	3217.49	2324.89	2565.92	2450.93	2714.51	2722.25	2690.8	2621.12	2514.14	2370.8	2393.31	2402.07	2397.42	2379.68	2349.2	2303.9	2246.34	2262.48	2107.06	2073.13	2028.11	1954.1	1938.64	1893.38	1830.17	1758.65
60	0	0	0	0	0	0	0	0	0	0	0	0	0	0	0	0	0	0	0	0	0	0	0	0	0	0	0.162927	0.26048	0.296677	0.33753	0.383609	0.435549	0.494059	0.559934	0.634057	0.717417	0.811115	0.916379	1.03458	1.16724	1.31606	1.36008	1.39942	1.4327	1.45829	1.47434	1.47867	1.46878	1.45011
64	0	0	0	0	0	0	0	0.144859	0.285749	0.56356	0.716494	1.05981	1.56713	2.31654	3.42316	5.05666	7.46694	11.022	16.2633	15.9917	15.718	15.4424	15.1648	16.3738	17.5247	21.4809	28.0708	34.3708	37.2507	37.6443	38.0395	38.4362	38.8345	39.2341	39.635	40.0372	40.4404	40.8447	41.2499	44.4549	47.9052	51.6191	55.6165	59.9184	65.982	72.653	79.9915	88.0633	97.5002
68	0	0	0	0	0	0	0	0	0	0	0	0	0	0	0	0	0	0	0	0	0	0	0	0	0	0	4335.42	8471.5	8566.24	8661.47	8757.18	8853.35	8949.96	9047	9144.44	9242.27	9340.45	9438.98	9537.82	11227.8	13216.1	13268.3	13317.6	15760.2	13430	11139.2	18005.1	15596.4	17903.1
70	0	0	0	0	0	0	0	35.5421	70.1104	138.273	217.218	216.78	216.473	216.101	215.663	215.155	214.575	213.923	213.195	212.39	211.504	219.143	226.298	232.968	239.154	244.854	292.634	285.997	300.703	310.462	320.517	330.875	341.545	352.534	363.852	375.505	387.504	399.856	412.571	433.751	455.982	479.314	503.799	529.492	581.37	638.276	700.69	769.14	849.07
72	0	0	0	0	0	0	0	0	0.0992612	0.195765	0.386016	0.759056	1.49216	2.93242	5.76104	11.3145	22.2137	43.5971	85.5333	167.745	328.846	393.751	475.482	579.825	715.177	894.074	1135.85	5826.55	6365.34	6876.65	7398.18	7931.32	8477.68	9039.14	9617.91	10216.6	10838.5	11487.2	12167.6	12885.5	13648.2	13401.8	13174	12969.4	12794.4	12658.6	12576.6	12572.2	12760.3
76	0	0	0	0	0	0	0	0	0	0	0	0	0	0	0	0	0	0	0	0	0	0	0	0	0	0	352.996	689.763	748.059	812.22	883.04	961.457	1048.59	1145.78	1254.65	1377.16	1515.71	1874.21	2272.53	2725.08	3192.23	4040.24	5131.31	6542.41	8379.41	10792.3	13997	18321.5	24420.5
84	0	0	0	0	0	0	0	0	0	0	0	0	0	0	0	0	0	0	0	0	0	0	0	0	0	0	6.53906	6.83288	7.19	7.56531	7.95967	8.37403	8.80936	9.26668	9.74705	10.2516	10.7814	11.3378	11.9221	11.972	12.0211	12.0695	12.1172	12.1639	13.293	14.5257	15.8712	17.3399	19.052
86	0	0	0	0	0	0	0	0	0	0	0	0	0	0	0	0	0	0	0	0	0	0	0	0	0	0	0	0	0	0	0	0	0	0	0	0	0	0	0	0	0	0	0	0	0	0	0	0	0
90	0	0	0	0	0	0	0	0	0.00030025	0.00059216	0.000637691	0.000924557	0.00133885	0.00193621	0.002796	0.00403105	0.00580114	0.00833146	0.0119376	0.0170589	0.024301	0.0344888	0.0487269	0.0684566	0.0954812	0.131886	0.179668	0.239552	0.293762	0.360077	0.441152	0.540206	0.661143	0.808683	0.988528	1.20755	1.47402	1.79786	2.19095	2.25249	2.31332	2.37301	2.43106	2.48686	2.48899	2.48633	2.47814	2.46351	2.4554
92	0	0	0	0	0	0	0	0	0	0	0	0	0	0	0	0	0	0	0	0	0	0	0	0	0	0	1.21165	2.32116	2.44248	2.56997	2.70394	2.8447	2.99258	3.14793	3.31112	3.48251	3.66251	3.85152	4.04998	4.06693	4.08363	4.10008	4.11625	4.13215	4.15237	4.17234	4.19203	4.21145	4.25497
96	0	0	0	0	0	0	0	0	0.00708197	0.0139672	0.0150412	0.0218074	0.0315792	0.0456691	0.0659489	0.09508	0.136831	0.196513	0.281572	0.268244	0.254749	0.289238	0.45405	0.467791	0.474517	0.364134	0.413381	0.440932	0.448869	0.480173	0.513415	0.54868	0.586049	0.625597	0.667397	0.711507	0.757978	0.806841	0.858107	0.879766	0.901023	0.921713	0.941644	0.96059	0.948329	0.934428	0.961651	0.983058	1.00396
100	0	0	0	0	0	0	0	84.0991	165.894	327.18	595.351	731.681	851.093	728.74	617.105	515.447	423.068	797.107	1315.74	2307.32	2952.55	4004.04	3318.61	2573.99	1598.37	1642.19	2042.44	841.902	865.458	889.615	914.386	939.783	965.82	992.51	1019.86	1047.9	1076.62	1106.05	1136.2	1167.08	1198.71	1231.1	1264.25	1256.53	1248.75	1240.91	1233.01	1225.05	1224.06
104	0	0	0	0	0	0	10.9422	11.2871	58.4213	115.22	192.744	204.93	215.824	225.42	233.707	240.671	246.296	250.554	253.415	254.832	254.749	301.29	340.538	308.317	341.059	364.134	372.043	27.3688	29.0373	30.8055	32.6792	34.6645	36.768	38.9963	41.3568	43.8571	46.505	49.3092	52.2786	55.4224	58.7508	62.274	66.0032	72.6702	80.0039	88.0701	96.9411	106.696	118.1
108	0	0	0	0	0	0	0	0	2.39322	4.71995	5.66837	8.02127	11.3436	16.0313	22.6401	31.9495	45.0511	63.4722	89.3456	107.977	125.147	146.902	166.773	184.772	200.906	215.182	226.78	236.598	237.975	238.311	238.75	239.304	239.987	240.814	241.803	242.978	244.363	245.991	247.902	250.144	252.779	255.886	259.569	263.969	269.277	275.771	283.862	294.201	309.675
112	0	0	0	0	0	0	0	0	20.0388	39.521	90.9169	201.125	215.734	228.785	240.268	230.925	221.542	229.78	236.363	241.243	244.36	346.77	489.868	458.739	426.468	523.466	594.001	703.477	815.362	866.076	919.499	975.712	1034.79	1096.79	1161.77	1229.74	1300.72	1374.67	1451.54	1531.2	1613.48	1698.14	1784.83	1873.08	1962.3	2051.66	2140.11	2226.26	2321.57
116	0	0	0	0	0	0	29.8833	41.0373	37.826	74.6013	96.3033	100.189	104.106	108.032	111.942	115.806	119.587	123.239	126.707	127.416	127.374	132.568	136.215	138.211	138.401	136.55	137.656	134.484	133.496	132.437	131.307	130.103	128.823	127.466	126.028	124.508	122.902	121.206	119.416	117.527	116.526	115.938	115.202	114.302	36.2087	47.8317	63.4617	84.1915	112.327
120	0	0	0	0	0	0	0	421.549	596.2	832.01	1133.06	1259.9	1399.71	1553.57	1722.55	1907.71	2110.08	2330.57	2569.92	2828.56	3106.45	3402.82	3715.75	4041.51	4373.45	4699.8	4999.32	5230.45	5108.51	5074.75	5041.25	5008.03	4975.14	4942.62	4910.52	4878.88	4847.8	4817.35	4787.63	4758.79	4731	4704.48	4679.54	4656.56	4636.14	4619.11	4606.76	4601.19	4632.72
124	0	0	0	0	0	0	0	0	0	0	0	0	0	0	0	0	0	0	0	0	0	0	0	0	0	0	0	0	0	0	0	0	0	0	48.2819	71.8092	106.793	158.809	257.073	382.226	568.266	844.788	1255.77	1866.52	2780.68	3356.81	4253.39	4249.03	6128.13
132	0	0	0	0	0	0	0	0	0	0	0	0	0	0	0	0	0	0	0	0	0	0	0	0	0	0	2.29402	4.19851	4.42447	4.7191	5.03215	5.36465	5.71766	6.09226	6.4896	6.91085	7.35721	7.82992	8.33024	8.85945	9.41883	10.0097	10.6333	11.2909	11.9838	12.7131	13.4799	14.2851	15.217
136	0	0	0	0	0	0	0	0	0	0	0	0	0	0	0	0	0	0	0	0	0	0	0	0	0	0	0.928178	0.969883	1.02058	1.07385	1.12982	1.18864	1.25043	1.31535	1.38353	1.45515	1.53036	1.60934	1.69226	1.69934	1.70632	1.71319	1.71995	1.7266	1.73505	1.74339	1.75162	1.75973	1.77792
140	0	0	0	0	0	0	193.208	271.068	376.39	514.769	686.993	702.342	717.49	732.372	746.922	761.062	774.707	787.765	800.129	811.685	822.301	831.831	840.11	846.949	852.135	855.418	856.509	855.063	848.405	851.329	854.73	858.664	863.195	868.398	874.362	881.193	889.02	897.998	908.32	920.228	934.027	950.112	969.005	991.411	1018.31	1051.13	1092	1144.35	1221.09
144	0	0	0	0	0	0	0	0	19.0301	37.5317	40.3783	45.526	50.2208	54.4606	58.2427	61.5629	64.4155	66.7927	68.6843	70.0761	70.9494	75.4713	78.9197	71.6239	63.7636	63.0127	71.3237	75.7016	74.6215	71.686	68.8293	66.0488	63.3418	60.7056	58.1376	55.6349	53.1948	50.8145	48.4909	46.2211	52.4994	63.6317	224.233	233.889	243.94	254.402	265.288	276.616	290.066
148	0	0	0	0	0	0	1129.49	2228.45	4395.86	8669.6	10505.7	11683.7	12982.7	14412.7	15984.1	17706.9	19591.2	21646	23878.9	24286.3	24581	25345.6	25929.9	27048.5	28583.5	28802.4	31384.5	33032	33595.7	33348	33102.3	32859	32618.5	32381.1	32147.2	31917.6	31692.9	31474.1	31262.3	31058.9	30866	30686	30522.3	30379.7	30264.9	30187.9	30164.1	30218.6	30570.8
152	0	0	0	0	0	0	0	0	0	0	0	0	0	0	0	0	0	0	0	0	0	0	0	0	0	0	477.671	933.379	950.531	967.936	985.593	1003.5	1021.67	1040.1	1058.78	1077.72	1096.91	1116.37	1136.08	1244.36	1362.86	1492.52	1829.87	2279.81	2663.03	3070.71	3449.22	3837.82	4415.43
156	0	0	0	0	10429.4	17153.6	28208.1	46378.2	76238.1	75179.3	132276	46117.2	38051.9	18967.4	25527.7	31124.3	41172.9	33531.1	25830.2	30669.5	27905.7	67385.7	75427.9	57293.4	49950.7	62574.2	65723.6	65114.2	67592.9	77006	81209.5	90638.5	112119	122857	136097	169001	181562	175948	204235	208834	227914	238959	247364	240949	196248	190373	188027	191593	194636
158	0	0	0	0	0	0	0	0	21.2052	41.8214	47.9416	46.3238	44.7048	43.0833	41.4579	39.8267	38.1876	36.5379	34.8743	33.1925	31.4869	35.7004	39.162	41.8252	43.621	44.4427	40.1033	176.292	196.445	202.438	208.487	214.577	220.689	226.8	232.886	238.916	244.853	250.658	256.279	261.658	260.456	260.449	259.894	258.321	255.747	252.586	248.125	269.083	290.843
162	0	0	0	0	0	0	0	0	0	0	0	0	0	0	0	0	0	0	0	0	0	0	0	0	0	0	0	0	0	0	0	0	0	0	0	0	0	0	0	0	0	0	0	0	0	0	0	0	0
166	0	0	0	0	0	0	0	0	0	0	0	0	0	0	0	0	0	0	0	0	0	0	0	0	0	0	0	0	0	0	0	0	0	0	0	0	0	0	0	0	0	0	0	0	0	0	0	0	0
170	0	0	0	0	0	0	0	0	0	0	0	0	0	0	0	0	0	0	0	0	0	0	0	0	0	0	2409.9	4708.99	5022.92	5357.44	5713.85	6093.57	6498.07	6928.95	7387.87	7876.63	8397.1	8951.3	9541.36	10169.5	10838.2	11549.9	12307.4	13401.7	14592	15886.7	17294.7	18825.9	20609
174	0	0	0	0	0	0	0	0	0	0	0	0	0	0	0	0	0	0	0	1.67659	3.18448	3.61563	3.97313	4.25288	4.44889	4.55204	5.16777	5.51238	5.38072	5.65322	5.93668	6.2312	6.53677	6.85334	7.18074	7.51869	7.8668	8.22447	8.59094	8.96517	9.34586	9.73133	10.1195	10.5076	10.8924	11.2696	11.634	11.9788	12.3663
175	0	0	0	0	0	0	0	0	0	0	0	0	0	0	0	0	0	0	0	0	0	0	0	0	0	0	0	0	0	0	0	0	0	0	0	0	0	0	0	0	0	0	0	0	0	0	0	0	0
178	0	0	0	0	0	0	505.66	997.653	1219	1458.33	1679.55	1856.08	2048.76	2258.57	2486.38	2732.95	2998.79	3284.15	3588.8	3911.89	4251.68	4605.19	4967.6	5331.52	5685.66	6012.66	6285.27	6458.43	6377.61	6322.08	6267.26	6213.24	6160.14	6108.08	6057.23	6007.79	5959.99	5914.14	5870.59	5829.84	5792.47	5759.29	5731.37	5710.16	5697.7	5696.98	5712.5	5751.48	5859.94
180	0	0	0	0	0	0	789.011	1556.7	1838.92	2127.28	2366.46	2979.7	3752.15	4724.39	5946.78	7481.55	9405.09	11810.4	14809.6	15860.1	16720.4	18436.1	19817.5	20843.3	22556.3	23657.2	22710.1	21187.2	20924	20623.2	20320.7	20016.4	19710	19401.3	19090.1	18776.3	18459.4	18139.2	17815.4	17487.6	17155.4	16818.3	16475.8	16127.4	15772.7	15411.5	15043.8	14670.8	14378.6
184	0	0	0	0	0	0	0	0	0	0	0	0	0	0	0	0	0	0	0	0	0	0	0	0	0	0	0	0	0	0	0	0	0	0	0	0	0	0	0	0	0	0	0	0	0	0	0	0	0
188	0	0	0	0	0	0	0	0	0	0	0	0	0	0	0	0	0	0	0	0	0	0	0	0	0	0	4.96866	18.2592	20.0764	22.0605	24.2259	26.5884	29.1648	31.9734	35.0342	38.3684	41.9995	45.9523	52.4748	59.8293	72.0889	87.9221	104.701	111.566	130.497	153.793	171.407	199.699	224.264
191	0	0	0	0	0	0	0	79.1156	138.983	244.105	428.653	411.204	394.702	378.748	363.324	348.416	334.007	639.14	1071.47	1467.95	1550.09	2043.44	1670.01	1266.4	1499.56	1108.48	1078.41	1023.76	958.734	907.806	852.512	792.636	727.956	718.673	707.99	695.833	682.124	666.781	652.313	648.302	642.111	633.535	622.352	608.327	617.684	622.985	623.355	617.789	608.629
192	0	0	0	0	0	0	0	0	0	0	0	0	0	0	0	0	0	0	0	0	0	0	0	0	0	0	46.37	55.5196	62.7468	70.9103	80.1305	90.5435	102.303	115.581	130.574	147.5	166.609	188.18	212.527	240.005	292.597	355.373	431.582	444.904	457.075	475.038	494.326	514.351	660.574
196	0	0	0	0	0	3.7125	5.79742	8.96584	13.6729	20.3945	29.2111	29.1967	29.1456	29.0545	28.9196	28.7366	28.5004	28.2054	27.8447	23.1844	18.8466	17.8017	18.9626	20.8374	14.4783	17.6841	9.56017	7.68458	7.52447	7.36332	7.20101	7.0374	6.87234	6.70565	6.53715	6.36659	6.19372	6.01821	6.26441	6.48071	6.66572	6.81773	6.93464	7.40874	7.80778	8.1251	8.35178	8.47545	9.16509
203	0	0	0	0	0	27.539	54.7083	108.662	215.786	428.435	850.471	804.821	761.4	720.103	680.832	643.494	608	1146.69	1894.66	2875.28	3321.62	4970.53	5138.49	5559.82	5231.01	4433.91	5294	5025.71	4731.28	4420.04	4092.48	3749.14	3390.5	3294.09	3191.78	3083.75	2970.18	2851.26	2738.04	2620.09	2866.23	3056.56	2969.64	2942.72	2907.17	2829.98	2700.49	2604.29	2513.71
204	0	0	0	0	0	26.103	40.983	63.8539	98.4425	149.424	221.138	245.389	272.086	301.437	333.658	368.974	407.611	449.801	495.768	545.727	599.876	658.377	721.347	788.836	847.345	896.779	880.206	800.208	730.322	666.473	608.146	554.867	506.203	461.759	421.171	384.109	350.269	319.375	291.171	269.574	249.549	230.984	213.772	197.818	199.218	200.6	201.965	203.311	205.817
208	0	0	0	0	0	6.581	7.26315	8.01454	8.842	9.75302	238.14	247.646	255.328	261.341	265.83	268.929	270.763	542.033	947.331	1340.33	1476.27	2149.13	1910.6	1544.39	1162.45	1231.64	1143.77	1240.92	1158.71	1075.24	990.112	903.23	814.455	802.314	775.901	748.262	719.437	689.465	696.159	696.888	714.535	705.491	718.225	744.608	754.436	750.843	740.224	730.405	721.521
212	0	0	0	0	0	0	0	0	0	0	0	0	0	0	0	0	0	0	0	0	0	0	0	0	0	0	0.125679	0.150477	0.170737	0.193713	0.219766	0.249306	0.282797	0.320765	0.363805	0.412591	0.467884	0.530548	0.601559	0.682022	0.773187	0.876468	0.97209	1.1277	1.19678	1.19252	0.822888	1.12243	1.30732
214	0	0	0	0	0	0	0	0	0	0	0	0	0	0	0	0	0	0	0	0	0	0	0	0	0	78.4146	76.6524	76.4811	77.4809	78.4886	79.5042	80.5275	81.5584	82.5967	83.6424	84.6952	85.755	86.8217	87.8949	91.5167	95.2803	99.1907	103.253	107.473	137.024	174.685	223.83	284.947	351.394
218	0	0	0	0	0	0	0	0	0	0	0	0	0	0	0	0	0	0	0	0	0	0	0	0	0	0	224.356	289.642	294.375	298.995	303.503	307.899	312.183	316.355	320.414	324.36	328.195	331.916	339.247	346.4	441.495	514.217	598.415	622.596	637.278	669.034	672.274	670.651	700.458
222	0	0	0	0	0	0	0	0	0	0	0	0	0	0	0	0	0	0	0	0	0	0	0	0	0	0	19.7355	27.8317	28.5989	29.4557	30.4414	31.612	33.0489	34.8703	37.249	44.3089	51.5102	58.8462	67.0453	75.5023	89.229	103.384	117.949	128.345	136.014	149.725	159.342	164.975	190.768
226	0	0	0	0	0	5.5379	6.72638	8.16242	9.89517	11.9827	14.4932	15.8024	17.2245	18.7688	20.4448	22.2631	24.2346	26.3711	28.6853	31.5802	34.3242	33.5619	32.8021	48.0672	54.7579	61.0764	63.3012	65.3446	65.1341	64.9196	64.7187	64.5329	64.3645	64.2158	64.0898	63.9901	63.9212	63.8889	63.9007	63.9662	64.0986	64.3166	64.6469	65.1309	65.8362	66.8846	68.5295	71.4403	79.0586
231	0	0	0	0	0	1373.21	1801.9	2341.89	3002.06	3765.8	4541.39	5367.08	6335.19	7467.98	8790.45	10330.3	12117.9	14185.6	16567.6	15782.4	14987.3	14179.1	13353.6	12505.3	11625.8	10702.8	9716.39	8630.97	8651.09	8663.37	8667.69	8663.9	8651.86	8631.37	8602.25	8564.25	8517.12	8460.55	8394.19	8317.65	11329.7	14154.1	16785.9	19219.4	21447.2	23460.9	25249.8	26800.4	28258
232	0	0	0	0	0	373.352	438.817	511.481	589.258	667.02	732.917	765.251	798.289	831.945	866.113	900.665	935.444	970.263	1004.9	1018.45	1027.47	1130.15	1219.13	1368.56	1496.14	1601.27	1695.69	1764.02	1772.95	1785.95	1800.39	1816.45	1834.34	1854.29	1876.59	1901.6	1929.74	1961.52	1997.59	2038.78	2086.11	2140.96	2205.15	2281.18	2372.57	2484.51	2624.94	2806.91	3071.13
233	0	0	0	0	0	0	0	3.33564	13.1598	51.9081	204.708	423.721	430.396	436.573	442.164	447.067	451.165	454.319	456.367	457.114	456.32	453.689	448.84	441.27	430.283	414.861	393.39	362.986	414.639	473.36	540.047	615.7	701.419	798.412	907.995	1031.59	1170.72	1326.97	1502.01	1662.84	1837.62	2026.58	2229.62	2446.01	2433.53	2410.91	2375.78	2324.92	2266.68
234	0	0	0	0	0	1.83594	2.56661	3.5539	4.88635	6.6819	6.96251	7.00841	7.05231	7.09412	7.13371	7.17098	7.20579	7.23803	7.26757	7.29426	7.31798	7.33857	7.3559	7.3698	7.38012	7.3867	7.38936	7.38794	9.16365	11.3654	14.0953	17.4797	21.6751	26.8758	33.3218	41.311	51.2119	63.4809	78.6834	97.519	120.854	149.761	185.567	229.914	284.836	352.848	437.06	541.323	674.265
238	0	0	0	0	0	0	0	0	0	0	0	0	0	0	0	0	0	0	0	0	0	0	0	0	0	0	0	0	0	0	0	0	0	0	0	0	0	0	0	0	0	0	0	0	0	0	0	0	0
242	0	0	0	0	0	0	0	0	0	5.10443	5.64425	6.08594	6.55677	7.05781	7.58998	8.15401	8.75038	9.37927	10.0404	10.7331	11.4558	12.2063	12.9812	13.7757	14.5832	15.3949	16.1987	16.9787	17.6636	18.374	19.111	19.8753	20.6679	21.4895	22.3412	23.2239	24.1385	25.0859	26.0673	27.1587	28.2921	29.4687	30.6901	31.9575	32.6082	33.2672	34.4122	35.5148	36.7863
246	0	0	0	0	0	1.56544	2.20013	2.72204	3.11335	3.90086	9.57814	6.94072	8.93017	10.7569	12.4201	13.9185	15.2503	16.413	17.4034	20.5354	23.2449	25.5168	27.3297	28.6529	24.1319	22.1068	39.8379	69.89	74.83	80.0715	85.6253	91.5011	97.7066	104.248	111.127	118.344	125.892	133.758	141.923	150.354	169.673	174.113	189.802	192.55	198.026	205.641	224.959	241.788	260.699
250	0	0	0	0	0	127.746	250.331	492.079	1206.2	2383.47	5880.27	6409.77	6840.55	5726.24	4712.64	4231.55	3788.21	7529.97	13077.3	20252.8	23773	35285.6	36972.7	40685.9	31766	30518.8	29924.9	34113	32104	29982.8	27752.7	25417.3	22979.8	22299.7	21582.5	20829.3	20041.3	19219.7	19745.8	20012.7	19916	19983.3	19965.1	19449	18800.9	18430.1	17875.7	17211.7	16625.9
254	0	0	0	0	0	0	0	0	0	0	0	0	0	0	0	0	0	0	0	0	0	0	0	0	0	0	0.140271	0.197816	0.223362	0.252047	0.284243	0.320365	0.360873	0.406283	0.457166	0.514162	0.577981	0.649411	0.737422	0.836542	0.948105	1.0736	1.21469	1.25294	1.28643	1.3138	1.3335	1.34372	1.35011
258	0	0	0	0	0	0	0	0	0	0	0.00600144	0.00877079	0.0128111	0.0187018	0.0272848	0.0397819	0.0579648	0.0844001	0.122802	0.178539	0.259363	0.376452	0.545903	0.790862	1.14456	1.6546	2.38911	3.4453	3.59167	3.74398	3.90246	4.06734	4.23886	4.41727	4.60282	4.79578	4.99642	5.20502	5.42188	5.66296	5.91425	6.17614	6.44904	6.73338	6.88926	7.04807	7.20985	7.37461	7.58589
262	0	0	0	0	0	26.0828	39.8976	60.837	92.5187	140.376	212.563	213.742	214.86	215.916	216.905	217.826	218.673	219.444	220.134	228.344	236.107	278.197	318.544	357.136	393.959	429.001	446.491	462.835	458.633	459.43	460.392	461.537	462.885	464.463	466.298	468.426	470.888	473.733	477.023	480.834	485.261	490.426	496.487	503.657	512.228	522.613	535.426	551.627	576.139
266	0	0	0	0	0	0	0	0	144.06	221.619	339.46	382.702	431.311	485.931	547.281	616.156	693.445	780.133	877.314	986.2	1108.14	1244.6	1397.25	1567.87	1758.48	1971.25	2208.59	2473.15	2504.14	2507.64	2511.99	2517.28	2523.62	2531.15	2540	2550.36	2562.43	2576.49	2592.83	2611.86	2634.05	2660.03	2690.62	2726.91	2770.37	2823.12	2888.3	2970.78	3096.54
268	0	0	0	0	0	8.5635	19.7151	45.3802	104.437	240.301	552.805	1164.67	1204.16	1243.26	1281.68	1319.04	1354.92	1388.78	1419.97	1427.37	1425.92	2020.28	2531.76	2958.5	2190.68	2510.63	2711.98	2775.9	1730.13	1834.13	1943.14	2057.2	2176.32	2300.44	2429.46	2563.17	2701.28	2843.37	2988.83	3136.87	3286.44	3436.13	3584.11	3727.95	3864.46	3989.32	4096.67	4178.29	4246.6
270	0	0	0	0	0	0.193977	0.269082	0.370489	0.507207	0.691242	0.938586	1.05789	1.19197	1.3426	1.51176	1.70163	1.91465	2.15353	2.42128	2.72122	3.05704	3.43282	3.85306	4.32274	4.84731	5.43279	6.08578	6.8135	6.10441	5.46876	4.89897	4.38825	3.9305	3.52026	3.15262	2.82316	2.52795	2.26344	2.02645	3.01381	4.4819	6.66458	9.90941	14.7329	21.9023	32.5579	48.3931	71.9237	107.503
275	0	0	0	0	0	21.3311	26.7146	33.1658	40.67	48.9402	57.0023	56.4414	55.8307	55.1675	52.132	49.2013	46.3711	43.637	40.9947	38.4396	35.9669	33.5715	31.2477	28.9893	26.7891	24.638	22.5251	20.4351	22.3949	24.5386	26.8829	29.4461	32.2477	35.3094	38.6543	42.3078	46.2971	50.652	53.4256	56.3386	59.3965	62.6053	65.971	69.4996	69.0075	68.4998	67.9761	67.4359	67.2647
276	0	0	0	0	0	55.4457	107.121	196.085	382.679	749.794	3572.11	3658.41	3723.53	3518.05	3322.87	2913.39	2538.41	4981.92	8552.29	11980.3	12917.4	18409.4	21410.4	23165.9	18889.8	18474.6	19607.4	20164.9	19863.6	19336.4	18588.9	17626.5	16454.6	16475.3	16415.1	16275.9	16059.9	15769	15014.2	14159.5	14289.6	14052.5	13308.8	12727.1	12256.2	11852.2	11102.5	10586.6	11922.6
288	0	0	0	0	0	0	0	131.518	202.513	310.439	474.146	534.406	602.133	678.218	763.658	859.56	967.155	1087.81	1223.04	1374.53	1544.15	1733.94	1946.19	2183.4	2448.33	2744.03	3073.81	3441.34	3442.25	3444.1	3446.98	3451	3456.31	3463.04	3471.39	3481.56	3493.82	3508.47	3525.89	3546.55	3571.03	3600.07	3634.66	3676.09	3726.12	3787.27	3863.23	3959.78	4110.14
292	0	0	0	0	0	0	0	0	0	0	0	0	0	0	0	0	0	0	0	0	0	0	0	0	0	0	0	0	0	0	0	0	0	0	0	0	0	0	0	0	0	0	0	0	0	0	0	0	0
296	0	0	0	0	0	0	0	0	0	0	0	0	0	0	0	0	0	0	0	0	0	0	0	0	0	0	0	0	0	0	0	0	0	0	0	0	0	0	0	0	0	0	0	0	0	0	0	0	0
300	0	0	0	0	0	26.2143	52.6953	105.804	318.321	1063.06	2128.14	2095.46	2062.67	1776.05	1497.56	1129.08	772.151	806.235	838.6	869.24	898.145	951.746	1011.22	1059.1	747.198	813.104	1193.9	1168.06	1211.16	1253.42	1294.85	1335.44	1375.21	1414.14	1452.24	1489.51	1525.94	1561.53	1596.29	1630.22	1771.19	1923.97	2090.24	2270.23	2466.19	2705.63	2967.38	3254.63	3476.62
304	0	0	0	0	0	0	0	0	0	0	0	0	0	0	0	0	0	0	0	0	0	0	0	0	0	0	0	0	0	0	0	0	0	0	0	0	0	0	0	0	0	0	0	0	0	0	0	0	0
308	0	0	0	0	0	0	0	0	0	0	0	0	0	0	0	0	0	0	0	0	0	0	0	0	0	0	0.634975	0.895464	0.984584	1.08189	1.18808	1.30394	1.43029	1.56803	1.71814	1.88166	2.05973	2.25358	2.49188	2.62894	2.77098	2.91811	3.07048	2.94549	2.81564	2.67724	2.52997	2.37354	2.22036
312	0	0	0	0	0	0	0	0	0	0	0	0	0	0	0	0	0	0	0	0	0	0	0	0	0	0	6.39183	6.67902	7.02811	7.39496	7.78045	8.18548	8.61101	9.05803	9.52758	10.0208	10.5387	11.0826	11.6536	11.7024	11.7505	11.7978	11.8443	11.8901	11.9483	12.0057	12.0624	12.1182	12.2435
316	0	0	0	0	0	0.045666	0.0535025	0.0620877	0.0710653	0.0795988	0.0857191	0.103567	0.124979	0.150617	0.181251	0.217761	0.261152	0.31255	0.373195	0.444414	0.527568	0.623952	0.734617	0.860055	0.999649	1.15066	1.30628	1.4514	1.49881	1.54708	1.59615	1.64593	1.69634	1.74728	1.79862	1.85022	1.9019	1.95347	2.00469	2.06101	2.11666	2.17128	2.2244	2.27546	2.2774	2.27497	2.26748	2.25409	2.24666
320	0	0	0	0	0	0	0	0	0	0	0	0	0	0	0	0	0	0	0	0	0	0	0	0	0	0	145.649	219.585	220.153	220.582	220.878	221.045	221.088	221.01	220.817	220.512	220.099	219.583	221.395	223.004	256.756	294.376	337.224	355.417	367.562	367.015	352.912	336.899	337.694
324	0	0	0	0	0	0	0	0	291.881	448.951	687.579	775.155	873.601	984.222	1108.47	1247.96	1404.48	1580.04	1776.85	1997.36	2244.29	2520.65	2829.77	3175.3	3561.28	3992.15	4472.78	5008.5	5009.93	5012.7	5016.99	5022.94	5030.75	5040.64	5052.88	5067.78	5085.72	5107.13	5132.58	5162.75	5198.47	5240.85	5291.3	5351.7	5424.64	5513.76	5624.45	5765.12	5984.12
328	0	0	0	0	0	0	0	0	0	0	0	0	0	0	0	0	0	0	0	0	0	0	0	0	0	0	143.211	205.208	218.468	232.437	247.15	262.64	278.944	296.099	314.144	333.12	353.069	374.034	400.455	430.372	462.096	495.72	531.346	519.235	519.784	517.573	512.2	503.221	492.974
332	0	0	0	0	0	0	0	0	0	0	0	0	0	0	0	0	0	0	0	0	0	0	0	0	0	0	4.65088	7.51533	9.5466	12.1192	15.3757	19.4959	24.7061	31.2918	39.6123	50.1197	63.3831	80.1185	102.349	130.619	150.576	164.417	179.38	185.346	188.659	184.805	190.461	194.873	204.348
334	0	0	0	0	0	0	0	0	0	0	0	0	0	0	0	0	0	0	0	0	0	0	0	0	0	0	0	0	0	0	0	0	0	0	0	0	0	0	0	0	0	0	0	0	0	0	0	0	0
336	0	0	0	0	0	0	0	0	0	0	0	0	0	0	0	0	0	0	0	0	0	0	0	0	0	0	0	0	0	0	0	0	0	0	0	0	0	0	0	0	0	0	0	0	0	0	0	0	0
340	0	0	0	0	0	0	0	0	0	0	0	0	0	0	0	0	0	0	0	0	0	0	0	0	0	0	213.327	78.7917	82.8313	87.0228	91.3708	95.8799	100.555	105.401	110.422	115.624	121.011	126.589	133.832	141.35	274.631	326.531	387.914	400.937	398.986	394.938	388.525	379.456	369.53
344	0	0	0	0	0	0	0	0	0	0	0	0	0	0	0	0	0	0	0	0	0	0	0	0	0	0	0	0	0	0	0	0	0	0	0	0	0	0	0	0	0	0	0	0	0	0	0	0	0
348	0	0	0	0	0	69.4007	91.9132	121.706	241.689	359.898	357.211	337.699	319.16	301.547	284.818	224.107	169.227	398.553	789.442	1419.89	1845.34	2761.41	2854.72	3217.49	2906.12	2565.92	2042.44	2326.72	2361.57	2357.74	2316.15	2237.73	2123.39	2155.3	2173.64	2178.73	2170.91	2150.49	2136.46	2111.97	2241.94	2341.1	2323.52	2260.87	2209.18	2184.77	2157.82	2168.47	2142.97
352	0	0	0	0	0	4.82886	10.1259	21.0315	43.3749	88.9701	181.704	182.902	184.048	185.139	186.172	187.144	188.053	188.894	189.665	466.386	917.089	1261.79	1239.47	1216.98	1023.69	1004.11	820.32	796.502	806.485	816.539	826.664	836.859	847.12	857.448	867.84	878.295	888.811	899.386	910.017	939.884	970.656	1002.35	1035	1068.63	1069.82	1070.92	1071.93	1072.84	1079.85
356	0	0	0	0	0	0	0	156.859	309.421	610.247	1203.3	2366.16	2436.46	2502.91	2565.51	2624.25	2679.15	2730.19	2777.37	2820.71	2860.19	2895.83	2927.61	2955.53	2979.61	2999.83	3016.21	3601.73	3652.31	3701.61	3749.64	3796.38	3841.84	3886.02	3928.92	3970.54	4010.88	4049.94	4087.72	4045.28	4224.63	4109.37	4456.54	4644.44	4828.15	4805.86	5176.07	5216.61	4823.09
360	0	0	0	0	0	36.8197	45.7157	56.7508	413.226	764.504	1110.43	1164.02	1211.94	1254.45	1291.82	1324.28	1352.06	1375.41	1394.54	1409.65	1420.95	1516.61	1601.84	1677.13	2051.32	2391.14	2513.34	2690.63	2644.32	2598.35	2552.74	2507.5	2462.64	2513.95	2560.32	2601.98	2639.12	2671.94	2742.19	2806.16	2864.11	2916.31	2963	3670.07	4334.05	4956.61	5539.4	6084.02	7161.67
364	0	0	0	374.74	1011.64	1885.79	3259.82	4599.16	5903.66	7173.19	14160.2	14503.9	14827.9	15132.1	15416.5	15681.1	15926	14223.3	12573.9	12932.7	13267.7	13723.3	14149.4	9697.11	10167.5	10608.1	12963.6	12667	13097.2	13266.4	13436.9	13608.6	13781.6	13955.9	14131.3	14308	14485.8	14664.7	14844.6	15025.7	15735.1	16429.6	17109	17773.4	18422.7	21049.3	23623.7	25500.8	27495.8
368	0	0	0	48.7786	53.9886	97.6188	291.136	482.207	838.322	1189.33	944.562	975.788	1005.46	988.65	971.811	911.541	852.781	1465.46	2055.02	1814.83	1582.29	1357.45	1045.27	744.689	729.159	713.607	872.542	682.438	677.138	671.835	666.53	661.222	655.912	650.599	645.283	639.965	634.645	629.321	656.726	685.272	715.003	745.964	778.202	811.767	919.282	1040.95	1178.62	1334.37	1519.28
372	0	0	0	0	0	0.0922072	0.363911	1.43597	5.66521	22.3461	88.1255	176.825	184.739	192.949	201.46	210.279	219.41	421.829	710.498	1011.67	1107.21	1840.94	2141.04	2059.19	1743.67	1642.19	2042.44	3877.87	4342.79	4087.08	3814.78	3525.27	3217.9	3074.08	2930.27	3117.76	3523.77	3585.22	4454.99	5641.73	6617.42	7475.59	6494.75	5775.22	5630.1	5643.91	5328.93	5243.05	5362.4
376	0	0	0	17.6337	25.099	35.5304	49.9413	69.5229	95.4429	128.177	165.362	239.687	346.987	501.638	362.064	260.888	187.633	134.662	96.4119	84.1298	72.5666	70.8678	68.8051	66.3354	44.7497	51.3324	46.3769	32.6885	34.8914	36.9721	38.9291	40.7608	42.4652	44.04	45.4825	46.7898	47.9584	48.9841	49.5673	50.587	51.5519	52.4476	53.2568	53.9585	52.9254	51.7503	50.4094	48.8714	47.3655
380	0	0	0	0	0	63.1002	120.717	229.588	721.604	1342.78	4545.81	4199.82	3865.85	3543.88	3233.89	2096.32	1019.25	1477.63	1901.06	2059.84	2287.53	2740.97	3425.17	4794.61	2906.17	3075.26	4223.49	3930.56	3988.17	4059.72	4130.9	4201.51	4271.33	4340.12	4407.6	4473.43	4537.23	4598.58	4656.94	4711.71	4908.48	5107.48	5307.32	5505.88	5473.91	5627.8	5816.36	5953.55	6131.88
384	0	0	0	0	0	130.407	191.364	278.162	401.509	576.426	823.985	928.938	1046.92	1179.49	1328.39	1495.56	1683.14	1893.54	2129.4	2393.67	2689.6	3020.81	3391.27	3805.37	4267.96	4784.34	5360.35	6002.4	5996.61	5992.13	5989.11	5987.69	5988.08	5990.48	5995.14	6002.37	6012.52	6026.02	6043.39	6065.28	6092.5	6126.08	6167.34	6218.08	6280.69	6358.61	6456.83	6583.13	6789.36
388	0	0	0	0	0	0	0	0	0	0	0	0	0	0	0	0	0	0	0	0	0	0	0	0	0	0	20.4609	13.2251	15.6796	18.5779	21.9986	26.0339	30.792	36.4	43.0068	50.787	59.9452	70.7213	84.321	88.4162	92.6244	96.9473	101.387	96.666	101.234	105.456	109.178	112.215	115.004
392	0	0	0	0	0	30.9217	43.4582	60.4876	83.0182	111.444	143.653	231.324	312.509	473.227	620.896	894.591	1143.54	1640.94	1913.91	2119.21	1884.15	1838.96	1784.1	1900.66	2243.07	2717.35	3383.36	4658.27	4953.91	4847.59	4740.5	4632.54	4523.61	4383.16	4243.04	4103.1	3963.22	3823.22	3815.38	3798.68	3772.58	3736.39	3689.25	3671.44	3636.67	3712.67	3830.74	4027.52	4248.05
398	0	0	0	0	43.4397	100.026	230.281	530.061	1219.87	2806.82	6457.01	13603.9	14373.6	15181.7	16029.7	16919.1	17851.3	18827.7	19849.8	19967.9	20068.5	20151.2	20215.9	22123.4	24349.1	26669.8	29853	32882.7	32318.5	31759.1	31204.3	30654.3	30108.9	29568.2	29032.2	28500.9	27974.3	27452.4	26935.3	26422.9	25915.1	25412.2	24913.9	24420.4	23931.6	30522	35720.5	48017.5	60427.5
400	0	0	0	29.101	38.6953	51.102	67.1531	87.9205	114.789	149.546	194.506	275.104	388.977	549.808	415.54	313.954	237.117	179.02	135.106	121.955	109.167	110.508	111.718	112.794	80.3532	99.3224	97.3183	75.5849	76.7855	76.3366	75.8852	75.4315	74.9754	74.5168	74.0558	73.5923	73.1264	72.658	72.1872	71.7139	74.8374	78.0908	81.4791	85.0072	88.6807	109.85	136.06	168.509	209.882
404	0	0	0	0	0	888.048	1069.95	1284.39	1532.24	1807.71	2085.94	2536.91	3082.69	3742.33	4538.41	5497.52	6650.84	8034.59	9690.48	10888.1	11958.1	13467.7	14784.8	15895.6	16779.1	17402.8	18899.9	19778	19932.8	19835.1	19739.6	19646.4	19555.9	19468.4	19384.3	19304.1	19228.2	19157.5	19092.6	19034.8	18985.2	18945.6	18918.3	18906.4	18914	18947.4	19015.9	19134.8	19441.9
408	0	0	0	0	0	25.7348	30.1402	34.959	39.9838	44.7286	48.0459	59.3877	73.3147	90.3829	111.255	136.714	167.681	205.218	250.538	268.201	282.609	320.317	401.399	281.173	303.874	318.096	358.19	392.478	422.101	434.777	447.545	460.367	473.197	485.983	498.663	511.165	523.402	535.274	546.66	557.417	548.488	531.94	514.652	496.511	477.366	456.785	437.191	415.534	393.482
410	0	0	0	0	0	25.7643	30.1748	34.9992	40.0297	44.7799	48.1011	63.8803	84.7294	112.228	148.425	195.963	258.235	339.562	445.4	476.8	502.415	569.451	713.596	499.861	540.219	565.501	636.777	697.73	751.212	787.589	825.195	863.993	903.93	944.932	986.901	1029.71	1073.18	1117.12	1161.26	1205.25	1179.31	1140.29	1099.92	1067.34	1032.05	987.92	940.617	889.39	850.611
414	0	0	0	0	0	6.39957	9.44261	13.9297	20.5446	30.2941	44.6599	45.4091	46.1572	46.9035	47.647	48.3865	49.1209	49.849	50.5695	49.5717	48.5746	47.578	46.5821	45.5868	44.5921	43.598	83.3568	70.5591	71.5594	71.697	71.8301	71.9586	72.0825	72.2015	72.3156	72.4247	72.5286	72.6273	72.7207	72.8085	72.8908	72.9673	73.038	73.1027	73.1613	73.2137	73.2597	73.2993	73.7552
417	0	0	0	0	10.5358	24.2601	55.8521	128.56	295.865	680.764	1566.08	3299.48	3412.48	3524.63	3635.1	3742.89	3846.83	3945.48	4037.14	4012.22	3967.88	4053.02	4098.3	4100.68	4055.67	3956.47	4099.48	4087.62	4234.22	4380.86	4530.27	4682.24	4836.48	4992.67	5150.42	5309.26	5468.63	5627.88	5786.22	5942.74	6096.33	6245.68	6389.24	6525.12	6651.04	6764.23	6861.23	6937.73	7028.52
418	0	0	0	0	0	29.0476	35.3519	42.9927	52.2438	63.4316	76.9447	81.2505	85.7715	90.516	95.4921	100.708	106.173	111.894	117.879	135.543	152.35	168.301	183.403	197.658	211.07	223.643	272.793	319.263	321.93	324.512	327.007	329.416	331.74	333.977	336.129	338.194	340.174	342.068	377.78	412.8	447.127	480.763	513.708	545.961	577.524	608.397	638.58	668.073	645.425
422	0	0	0	49.376	65.7057	87.0016	114.465	149.318	192.458	243.577	298.809	329.789	363.636	400.548	344.912	296.648	254.805	218.551	187.159	168.948	151.614	152.907	153.387	153.028	115.769	116.927	128.068	102.197	95.7141	92.598	89.57	86.6279	83.7694	80.9922	78.2942	75.6733	73.1275	70.6547	68.253	65.9206	70.6401	74.5319	78.622	82.9188	87.4312	102.697	102.041	111.635	111.507
426	0	0	0	0	0	0	0.0359362	0.0738629	0.161952	0.391125	1.10893	1.34773	1.64272	2.00864	2.46462	3.03565	3.75474	4.66584	5.82817	7.32243	9.26017	11.7979	15.1592	19.6696	25.8149	34.339	46.4189	253.362	279.143	306.225	334.768	364.959	397.017	431.207	467.842	507.308	550.071	596.715	647.971	704.774	768.338	778.505	792.02	809.9	833.627	865.453	908.981	970.382	1067.36
428	0	0	0	0	0	0	0.0792554	0.312738	1.23381	4.86671	19.1927	39.7265	40.4138	41.0634	41.6685	42.2213	42.7128	43.1328	43.4693	43.7083	43.8333	43.8242	43.6565	43.2993	42.7129	41.8436	40.6163	38.9176	44.6828	51.2886	58.855	67.5186	77.4345	88.7793	101.753	116.583	133.527	152.877	174.961	196.066	219.621	245.89	275.165	307.761	334.467	363.27	394.296	427.67	466.19
430	0	0	0	0	0	49.0451	76.9492	119.66	184.848	284.08	434.78	451.433	468.573	486.201	504.319	522.928	542.024	561.606	581.668	602.202	623.201	644.651	666.539	688.847	711.555	734.638	758.068	781.814	782.821	784.076	785.603	787.434	789.604	792.154	795.131	798.595	802.612	807.265	812.657	818.913	826.19	834.69	844.676	856.499	870.642	887.787	908.948	935.71	976.336
434	0	0	0	0	0	503.739	792.206	1234.01	1908.71	2936.28	4497.52	4991.2	5468.9	4852.15	4250.35	4396.45	4535.6	4667.71	4792.71	4812.31	4827.95	3321.29	1864.31	2745.72	3592.76	4405.04	4318.49	4231.3	3906.14	3902.13	3897.68	3892.8	3887.49	3881.74	3875.56	3868.94	3861.89	3854.4	3846.48	4129.82	4130.73	4130.98	4130.58	4129.54	4127.84	4125.49	4328.95	4893.71	5071.3
438	0	0	0	0	0	3.27917	3.72247	4.22493	4.79431	5.43937	6.17	5.95203	5.74007	5.53399	5.33364	5.13887	4.94955	9.51582	16.0278	22.0619	23.4061	29.7834	23.5637	17.344	19.9816	14.402	11.6978	11.3316	10.647	9.93447	9.19335	8.42303	7.62291	7.41597	7.19922	6.97244	6.73541	6.48791	6.39176	6.29009	6.18278	6.06971	5.95074	5.82576	5.69464	5.55725	5.41346	5.26316	5.13567
440	0	0	0	0	0	0	1.35383	5.34214	21.0759	83.1325	327.847	678.603	689.294	699.187	708.141	715.994	722.556	727.608	730.888	732.084	730.813	726.6	718.835	706.711	689.115	664.417	630.032	581.34	664.066	758.11	864.914	986.076	1123.36	1278.7	1454.21	1652.15	1874.97	2125.23	2405.57	2663.15	2943.07	3245.72	3570.9	3917.48	4164.01	4407.38	4640.15	4851.34	5053.28
442	0	0	0	0	0	7.41992	11.0552	16.4685	24.5278	36.5242	54.3772	52.4562	50.5882	48.772	47.0062	45.2897	43.6212	83.8645	141.255	194.435	206.282	262.486	207.67	152.856	176.101	126.928	103.095	99.8674	96.716	93.015	88.7197	83.7825	78.1527	78.3663	78.4125	78.2749	77.9364	77.3784	77.7705	82.282	86.8754	91.5183	96.1708	100.784	95.3973	94.8663	93.633	91.717	89.6523
446	0	0	0	0	0	0	0	0	0	0	0	0	0	0	0	0	0	0	0	0	0	0	0	0	0	0	0	0	0	0	0	0	0	0	0	0	0	0	0	0	0	0	0	0	0	0	0	0	0
450	0	0	0	0	0	2.02144	2.84564	3.96978	5.46706	7.3805	9.61977	18.6211	36.0066	69.5431	134.145	258.4	496.987	954.24	1828.7	2622.71	3335.31	4493.81	5512.46	6387.14	7111.96	8716.01	9803.78	10567.8	10606	10593	10584.1	10579.9	10580.9	10587.8	10601.6	10623	10653.4	10694.1	10747.1	10814.6	10899.4	11005.3	11137.3	11302.1	11509.2	11772.2	12111.7	12560.8	13252.8
454	0	0	0	0	0	8.1532	10.1225	12.5671	15.6019	19.3693	24.0466	28.906	34.7373	41.7323	50.1202	60.1744	72.2211	86.6492	103.922	119.846	135.071	158.864	181.58	203.219	223.778	243.259	258.09	272.001	274.115	277.109	280.35	283.868	287.696	291.875	296.453	301.488	307.049	313.221	320.111	327.852	336.613	346.617	358.157	371.637	387.62	406.934	430.841	461.395	505.113
458	0	0	0	0	0	1.80138	2.10979	2.44715	2.79898	3.13129	3.36389	4.87527	7.05684	10.2005	14.7223	21.2125	30.5058	43.7763	62.6651	62.9452	62.8398	70.9923	77.6637	82.7598	86.1412	87.5909	98.6682	103.858	105.225	106.428	107.464	108.327	109.015	109.523	109.844	109.973	109.902	109.622	111.703	113.392	114.669	115.51	115.884	144.693	170.478	193.011	211.992	222.902	244.796
462	0	0	0	0	0	0.00291675	0.00341607	0.00396223	0.00453174	0.00506952	0.00544554	0.00789206	0.0114234	0.0165119	0.0238309	0.0343356	0.0493768	0.070854	0.101422	0.144764	0.205931	0.29176	0.411317	0.576245	0.80071	1.10013	1.48658	1.95472	1.94935	1.94283	1.93509	1.92603	1.91556	1.90358	1.88996	1.87458	1.85727	1.83786	1.81615	1.85191	1.88502	1.91478	1.94035	1.96068	2.08413	2.20603	2.32266	2.42854	2.52988
466	0	0	0	0	0	13.1821	33.1352	81.0846	193.661	452.43	1035.85	1214.68	1423.71	1667.9	1953.01	2285.72	2673.73	3125.98	3652.77	3940.11	4235.91	4648	5072.35	5605.4	6345.73	6997.57	8306.95	9653.43	9784.72	9853.36	9926.62	10005	10089.2	10179.9	10278	10384.3	10500.2	10627.2	10766.9	10921.6	11094.1	11288	11508	11760.3	12053.6	12400.1	12818.2	13336.6	14084.9
470	0	0	0	0	0	0	0	0	0	0	0	0	0	0	0	0	0	0	0	0	0	0	0	0	0	0	0	0	0	0	0	0	0	0	0	0	0	0	0	0	0	0	0	0	0	0	0	0	0
474	0	0	0	0	0	0	0	0	0	0	0	0	0	0	0	0	0	0	0	0	0	0	0	0	0	0	1.87649	1.21288	1.43799	1.7038	2.01751	2.38759	2.82397	3.33828	3.94419	4.65772	5.49763	6.48592	7.73316	8.1676	8.61845	9.08617	9.57124	9.19183	9.10043	8.96214	8.77163	8.52316	8.25786
478	0	0	0	0	0	1.25319e-07	3.29729e-07	8.67395e-07	2.28137e-06	5.99915e-06	1.57724e-05	3.54453e-05	7.9633e-05	0.000178853	0.000401571	0.000901338	0.0020224	0.00453622	0.010171	0.0210552	0.043449	0.0915281	0.19179	0.417649	0.891638	1.87489	4.27643	9.55	19.1538	38.2536	76.4168	152.691	305.184	610.163	1220.35	2441.72	4887.7	9789.01	19617	19675.3	19749.7	19843.5	19960.6	20106.4	20288.2	20516.3	20805.9	21180.2	21803.1
480	0	0	0	0	0	0	0	0	0	0	0	0	0	0	0	0	0	0	0	0	0	0	0	0	0	0	3.7916	4.8424	5.88684	7.15609	8.69842	10.5725	12.8494	15.6155	18.9759	23.0577	28.0155	34.0367	41.3489	50.2282	61.0094	95.2797	80.2265	72.0859	66.3984	66.45	59.9013	51.5099	43.1858
484	0	0	0	0	0	0	0	0	0	0	0	0	0	0	0	0	0	0	0	0	0	0	0	0	0	0	7552.98	14758.7	15558.1	16301.5	16991	17628.9	18217.3	18758.3	19253.8	19705.8	20116	20486.3	20818.5	21114.1	21374.7	21602.1	21797.5	21962.6	22098.6	22207	26444.6	29494.2	33020.1
492	0	0	0	0	0	0	0	0	0	0	0	0	0	0	0	0	0	0	0	0	0	0	0	0	0	0	0	0	0	0	0	0	0	0	0	0	0	0	0	0	0	0	0	0	0	0	0	0	0
496	0	0	0	0	0	6716.5	9088.92	12314.8	16718.2	22763.8	31134	32349.3	33602.7	34894.8	36226	37596.8	39007.6	40458.9	41950.9	44025.5	46104.3	60230.6	74463.1	79437.3	56274.4	56448.8	56595.2	56711.9	57381.3	58573.2	59786	61019.7	62274.7	63551.1	64849	66168.7	67510.3	68874	70260	71668.3	73510.7	75988.9	78544.3	81178.9	83894.8	87540	97840.1	109342	122891
498	0	0	0	0	0	19.0187	20.8083	22.5546	24.1223	25.2653	25.4892	26.4123	27.3374	28.2595	29.1726	30.0696	30.942	31.7797	32.5706	33.3	33.799	48.0828	68.1332	64.0527	59.8524	73.9839	84.8184	102.109	66.1858	70.4666	74.9993	79.7958	84.8679	90.2277	95.8867	101.857	108.149	114.774	121.742	129.061	136.739	144.782	153.192	161.97	171.112	180.611	190.452	200.615	212.286
500	0	0	0	0	0	7.54682e-07	1.41481e-06	2.62721e-06	4.81209e-06	8.6261e-06	1.48706e-05	2.87493e-05	5.55139e-05	0.000107055	0.000206148	0.000396328	0.000760592	0.0014567	0.00278351	0.00530476	0.0100785	0.0190782	0.0359543	0.0673863	0	0	0	0.74951	0.795833	0.84466	0.896079	0.950171	1.00701	1.06667	1.1292	1.19465	1.26302	1.33432	1.40852	1.41877	1.42772	1.43519	1.44101	1.44494	1.44833	1.44929	1.44742	1.44231	1.44168
504	0	0	0	0	0	265.88	415.816	645.105	994.767	1526.64	2333.86	2459.52	2591.11	2728.83	2872.9	3023.51	3180.85	3345.13	3516.51	3763.47	3999.62	3733.58	3474.03	3808.4	3346.51	2735.05	4021.44	3064.24	3176.51	3286.65	3394.65	3500.51	3604.23	3705.82	3805.26	3902.56	3997.71	4090.71	4181.56	4270.26	4992.24	5701.05	6396.69	7079.15	7748.4	8404.45	9047.28	9676.88	10352.6
508	0	0	0	0	0	0.280218	0.774149	1.4851	3.03916	6.85043	18.1278	21.6871	26.021	31.3202	37.8296	45.8664	55.8448	68.3115	83.9955	132.738	191.585	313.246	464.237	654.294	897.473	1214.64	1795.86	10292.2	11387	12516.1	13678.2	14872.1	16096.5	17350.1	18631.4	19939.4	21272.6	22629.7	24009.5	25410.7	26847.6	28462.3	30126.4	31833.4	32106.1	32316.2	32456.6	32519.6	32684.3
512	0	0	0	0	0	50.3216	78.9116	122.666	189.439	291.071	445.4	454.48	463.594	472.734	481.889	491.048	500.197	509.325	518.417	509.876	501.266	492.587	483.84	475.025	466.144	457.197	526.617	592.794	596.93	600.927	604.786	608.505	612.086	615.528	618.831	621.995	625.019	627.904	630.65	633.256	645.239	658.468	671.912	685.575	699.456	712.52	743.215	775.164	813.076
516	0	0	0	0	0	0.370697	1.46302	4.00943	11.7215	37.7441	142.685	162.973	186.69	214.537	247.395	286.375	332.894	388.775	456.397	538.9	640.493	766.907	926.094	1129.32	1392.95	1741.38	2212.3	11348.3	12707.5	14153.7	15691.9	17327.4	19065.8	20912.7	22874.5	24957.6	27168.9	29515.6	32005.3	34646	37446.3	37444.1	37389.5	37277.9	37104.7	36864.8	36553	36163.4	35895.9
520	0	0	0	0	0	0	0	0	0	0	0	0	0	0	0	0	0	0	0	0	0	0	0	0	0	0	0	0	0	0	0	0	0	0	0	0	0	0	0	0	0	0	0	0	0	0	0	0	0
524	0	0	0	0	0	1.03976	2.56474	6.3252	15.5964	38.4494	94.7697	194.352	195.679	196.755	197.547	198.02	198.136	197.848	197.1	194.477	191.061	192.826	192.971	191.369	187.83	182.067	206.69	220.466	221.578	222.468	223.135	223.573	223.779	223.748	223.475	222.955	222.179	221.141	219.832	218.24	219.439	222.14	72.1326	92.8978	119.456	155.715	202.456	255.076	338.494
528	0	0	0	0	0	8.26107	16.4113	32.5963	64.731	128.521	255.122	229.702	206.754	186.042	167.353	150.492	135.285	242.754	679.143	1190.81	1361.91	2037.99	1777.66	2268.64	1829.55	2230.02	2521.49	3102.29	2888.42	2669.96	2447.11	2220.05	1988.97	1915.09	1839.6	1762.57	1684.07	1604.15	1530.58	1455.81	1487.19	1516.39	1515.29	1515.36	1511.49	1546.72	1576.33	1603.55	1645.6
530	0	0	0	0	0	0	0	0	0	0	0	0	0	0	0	0	0	0	0	0	0	0	0	0	0	0	0	0	0	0	0	0	0	0	0	0	0	0	0	0	0	0	0	0	0	0	0	0	0
533	0	0	0	0	0	0	0	0	0	0	0	0	0	0	0	0	0	0	0	0	0	0	0	0	0	0	0.0298357	0.0580097	0.0619527	0.0661594	0.0706471	0.0754341	0.08054	0.0859856	0.0917928	0.0979852	0.104588	0.111627	0.119131	0.121415	0.123733	0.126085	0.128472	0.144368	0.174471	0.280624	0.332707	0.422161	0.410614
540	0	0	0	0	0	0.503505	1.05531	2.19109	4.51767	9.26466	18.9182	20.7352	22.7195	24.8853	27.2482	29.8248	32.6331	35.6924	39.0231	42.6473	46.5886	50.872	55.524	60.5731	66.0489	71.9832	78.4091	85.3614	89.1605	93.1227	97.2545	101.563	106.055	110.737	115.619	120.707	126.009	131.535	137.292	143.689	150.371	157.352	164.644	172.259	176.614	181.063	185.608	190.25	196.115
548	0	0	0	0	0	0	0	0	0	0	0	0	0	0	0	0	0	0	0	0	0	0	0.0382982	0.0560791	0.0820751	0.120061	0.175534	0.256496	0.267757	0.279495	0.291727	0.304474	0.317757	0.331595	0.346012	0.36103	0.376671	0.392962	0.409925	0.428776	0.448458	0.469006	0.490456	0.512844	0.525505	0.538431	0.551627	0.565096	0.582181
554	0	0	0	0	0	0	0	0	0	0	0	0	0	0	0	0	0	0	0	0	0	0	117.618	144.353	141.664	555.817	953.568	1334.73	1243.24	1221.35	1199.77	1178.49	1157.51	1136.82	1116.42	1096.31	1076.48	1056.93	1037.66	1200.32	1388.38	1605.76	1857.03	2147.45	2483.07	2870.89	3793.14	4698.02	5617.71
558	0	0	0	0	0	0	0	0	0	0	0	0	0	0	0	0	0	0	0	0	0	0	0	0	0	0	186.626	120.627	131.341	142.915	155.415	168.909	183.471	199.181	216.122	234.386	254.068	275.272	301.414	329.717	398.536	473.852	562.929	554.82	542.462	568.337	593.34	614.969	635.548
562	0	0	0	0	0	553.789	714.049	919.331	1181.68	1516.04	1940.84	2174.79	2436.18	2728.1	3053.97	3417.57	3823.07	4275.09	4778.69	4931.59	5073.15	5327.36	5564.56	6032.19	6304.49	6736.73	7658.65	8524.29	8608.69	8608.26	8610.4	8615.4	8623.58	8635.31	8651.05	8671.31	8696.73	8728.07	8766.26	8812.44	8868.05	8934.93	9015.47	9112.86	9231.46	9377.44	9559.91	9793.06	10158.9
566	0	0	0	0	0	729.449	957.348	1244.59	1596.07	2003.47	2419.33	3118.52	4014.99	5162.43	6628.31	8496.92	10873.1	13886	17693.8	20238.5	22438.2	22764.4	22893.4	24152.5	24995	25376.9	29433.1	33825.6	33601.9	33223	32845.2	32468.8	32094	31721	31350.3	30982.4	30617.7	30257.2	29901.6	29552.4	29211.2	28880.2	28562.4	28262.1	27985.6	27741.7	27544.6	27417	27556.5
570	0	0	0	0	0	0	0	0	0	0	0.000801274	0.00116796	0.00170122	0.00247608	0.00360095	0.00523235	0.00759589	0.0110162	0.0159599	0.0230959	0.0333815	0.0481833	0.0694471	0.0999347	0.143552	0.2058	0.294387	0.42005	0.437396	0.455419	0.474141	0.493587	0.513784	0.534756	0.556531	0.579135	0.602597	0.626947	0.652213	0.68031	0.709542	0.739949	0.771573	0.804459	0.838649	0.87419	0.892939	0.911978	0.936681
574	0	0	0	0	0	0	0	0	0	0	0	0	0	0	0	0	0	0	0	0	0	0	0	0	0	0	0	0	0	0	0	0	0	0	0	0	0	0	0	0	0	0	0	0	0	0	0	0	0
578	0	0	0	0	0	0.782885	0.733591	1.36158	3.11518	5.57759	47.9617	50.979	53.6713	56.0368	58.0728	59.7753	61.1392	62.1577	62.8216	63.1188	63.0328	80.4105	95.222	104.709	48.5479	89.0652	100.518	106.163	107.746	109.292	110.794	112.246	113.638	114.961	116.205	117.357	118.405	119.331	120.12	127.582	140.425	152.902	167.831	183.015	193.204	197.292	201.052	213.431	215.899
580	0	0	0	0	0	0	0	0	0	0	0	0	0	0	0	0	0	0	0	0	0	0	0	0	0	0	0	0	0	0	0	0	0	0	0	0	0	0	0	0	0	0	0	0	0	0	0	0	0
583	0	0	0	0	0	0	0	0	0	0	0	0	0	0	0	0	0	0	0	0	0	0	0	0	0	0	0	0	0	0	0	0	0	0	0	0	0	0	0	0	0	0	0	0	0	0	0	0	0
584	0	0	0	0	0	0	0	0	0	0	0	0	0	0	0	0	0	0	0	0	0	0	0	0	0	0	0	0	0	0	0	0	0	0	0	0	0	0	0	0	0	0	0	0	0	0	0	0	0
585	0	0	0	0	0	0	0	0	0	0	0.060987	0.0750761	0.0923924	0.113667	0.139796	0.171874	0.21124	0.25953	0.318741	0.39131	0.480208	0.589058	0.722269	0.885206	1.08439	1.32774	1.62487	1.98743	2.07561	2.16757	2.26344	2.3634	2.46761	2.57623	2.68944	2.80742	2.93037	3.05847	3.19193	3.34021	3.49511	3.65689	3.82586	4.0023	4.10295	4.20576	4.31078	4.41802	4.55365
586	0	0	0	0	0.546428	1.79746	5.91164	19.4392	63.9097	210.073	690.382	1457.38	1504.15	1562.69	1612.99	1654.98	1688.55	1792.89	1881.58	2012.19	2120.72	2088.96	2046.52	1922.94	2033.6	2003.8	2386	2646.08	2627.3	2634.02	2639.83	2644.69	2648.53	2651.3	2652.92	2653.33	2652.45	2650.2	2646.48	2641.19	2634.23	2625.48	2614.81	2602.07	2587.09	2569.7	2549.69	2526.81	2515.24
591	0	0	0	0	0	0	0	0	0	0	0	0	0	0	0	0	0	0	0	0	0	0	0	0	0	0	83.8573	54.2019	57.9804	61.9831	66.2217	70.7089	75.4576	80.4814	85.7947	91.4125	97.3503	103.625	111.475	127.203	145.015	165.176	187.981	201.012	210.233	212.147	226.094	239.218	277.454
598	0	0	0	0	0	61.8962	86.9929	121.087	166.199	223.129	287.673	291.189	294.379	297.194	299.581	301.476	302.809	303.496	303.437	302.516	300.589	297.476	292.949	286.706	278.327	267.198	252.347	232.032	227.988	223.884	219.715	215.478	211.168	206.777	202.302	197.732	193.061	188.277	183.369	178.323	173.122	167.744	162.166	156.354	150.068	143.473	136.499	129.049	121.681
600	0	0	0	0	0	0	0	0	0	0	0	0	0	0	0	0	0	0	0	0	0	0	0	0	0	0	1220.33	1194.66	1246.85	1298.29	1348.97	1398.88	1448.02	1496.38	1543.96	1590.76	1636.76	1681.97	1893.45	2101.84	2307.15	2509.33	2708.38	2796.7	2883.39	2968.43	3051.82	3133.54	4038.32
604	0	0	0	0	0	0	0	0	0	0	0	0	0	0	0	0	0	0	0	0	0	0	0	0	0	0	1777.95	2652.84	2666.75	2679.02	2689.72	2698.88	2706.54	2712.76	2717.56	2720.99	2723.09	2723.89	2753.65	2781	3299.82	3843.36	4472.67	4776.05	4989.81	5425.2	6531.74	7060.95	7039.68
608	0	0	0	0	0	31.4567	35.3688	39.3837	43.2445	46.4447	47.9008	46.2819	44.6616	43.0387	41.4118	39.7789	38.138	36.4862	34.8202	33.1357	31.4269	53.4357	72.5514	88.6262	101.439	110.648	159.563	218.746	227.429	235.519	243.007	249.881	256.13	261.74	266.694	270.973	274.555	277.415	279.522	280.84	313.183	362.854	419.435	483.865	540.808	587.742	626.027	667.513	755.307
612	0	0	0	0	0	0	0	0	0	0	0	0	0	0	0	0	0	0	0	0	0	0	0	0	0	0	0	0	0	0	0	0	0	0	0	0	0	0	0	0	0	0	0	0	0	0	0	0	0
616	0	0	0	0	0	28.1796	44.0063	68.0591	155.694	222.963	958.221	1018.43	1072.14	1205.4	1325.55	1114.15	915.611	1167.98	1393.35	1491.75	1572.1	1782.15	2512.94	3651.93	3384.19	3544.43	3994.43	4207.76	4293.26	4402.11	4510.91	4619.26	4726.76	4832.9	4937.12	5038.76	5137.05	5231.1	5319.87	5402.13	5552.78	5809.76	6064.95	6695.31	7244.37	8140.99	8897.46	9094.39	9216.89
620	0	0	0	0	0	85.1392	119.666	166.577	228.663	307.046	396.011	425.17	410.317	395.441	380.529	329.009	280.423	268.317	256.109	304.71	346.881	409.711	462.315	600.109	400.614	536.992	773.116	700.155	892.404	902.553	902.045	900.941	899.197	898.001	896	893.134	889.331	884.511	876.641	867.889	886	904.653	896.219	927.494	964.569	1001.23	1049.6	1065.77	1097.17
624	0	0	0	0	0	3.67711	5.76754	8.96698	13.8498	21.2821	32.5687	36.7144	41.3744	46.6103	52.4909	59.0924	66.4999	74.8076	84.1204	94.5543	106.238	119.313	133.937	150.283	168.542	188.924	211.658	236.996	238.796	240.748	242.87	245.181	247.704	250.467	253.501	256.845	260.544	264.655	269.247	274.407	280.246	286.905	294.575	303.511	314.07	326.769	342.391	362.193	390.597
626	0	0	0	0	0	0.971039	1.1573	1.37363	1.62206	1.90279	2.21242	2.70165	3.29768	4.02345	4.90676	5.98119	7.28735	8.87427	10.8011	13.1391	15.9742	19.4094	23.5687	28.6009	34.6839	42.031	50.8965	61.584	62.164	62.7453	63.3276	63.9109	64.495	65.0797	65.6649	66.2504	66.8361	67.4217	68.0071	73.2012	78.7855	84.7888	91.2419	98.1777	101.406	104.732	108.157	111.683	115.979
630	0	0	0	0	0	0	0	0	0	0	0	0	0	0	0	0	0	0	0	0	0	0	0	0	0	0	1.99251	2.86281	3.62792	4.59722	5.82512	7.38048	9.3505	11.8455	15.0053	19.0065	24.0729	30.4876	38.6086	48.8891	57.3579	65.3033	79.7142	94.4491	110.024	124.978	138.719	153.434	184.669
634	0	0	0	0	0	0.395287	0.614928	0.950246	1.46082	2.23642	3.41212	3.48075	3.54964	3.6187	3.68785	3.75702	3.82609	3.89499	3.96359	4.03179	4.09946	4.16647	4.23268	4.29794	4.36211	4.42499	4.48643	11.0545	11.5174	11.9988	12.4995	13.0203	13.5618	14.1249	14.7103	15.3188	15.9514	16.6088	17.292	18.024	18.7854	19.5774	20.4012	21.2578	21.281	21.3024	21.3219	21.3395	21.4784
638	0	0	0	0	0	0.0209442	0.0294358	0.040971	0.056233	0.0754901	0.0973139	0.11753	0.141767	0.170767	0.205386	0.246606	0.295535	0.35341	0.421579	0.501462	0.594477	0.701908	0.824662	0.962852	1.11505	1.27688	1.43819	1.57658	1.85251	2.17544	2.55303	2.99409	3.50871	4.10844	4.80636	5.61732	7.01432	8.32132	9.45607	10.4487	11.0767	12.4843	12.6211	18.2133	19.4253	18.3229	16.0552	15.6231	14.7635
642	0	0	0	0	0	44.4164	73.5306	121.706	362.534	599.83	952.561	900.531	851.093	703.611	569.635	493.036	423.068	876.818	1578.88	2484.81	2952.55	4142.11	3568.4	3860.99	3632.65	4105.47	3267.9	3877.87	4250.41	4143.01	4005.09	3833.32	3624.06	3683.07	3735.04	3778.87	3813.38	3837.24	3917.98	3993.64	4206.44	4235.68	4255.86	4310.87	4334.64	4331.32	4297.97	4247	4276.16
643	0	0	0	0	0	88.211	203.084	467.47	1075.87	2475.66	5695.85	12603.1	13518.7	14341	15074.1	14523.7	14008.8	14666.6	15357.4	15658.5	15841.3	22446.3	31649	30597.8	28351.7	33469.7	37710.8	37503.7	41602.6	45488.8	49159.4	52611.3	55840.9	58843.8	61615.3	64149.7	66440.3	68479.4	70257.7	72661.7	75169.9	85979.2	89792.3	99104.9	102937	113047	123338	130661	152913
646	0	0	0	0	0	1.82718	2.30551	2.8912	3.59615	4.42226	5.346	7.57177	10.718	15.1623	21.4358	30.2845	42.7558	60.3178	85.0264	102.916	119.48	140.505	159.829	177.465	193.426	207.724	219.573	229.845	230.331	230.642	231.049	231.565	232.2	232.971	233.893	234.987	236.279	237.797	239.578	241.668	244.123	247.017	250.446	254.539	259.473	265.505	273.011	282.59	296.961
654	0	0	0	0	0	0.000848629	0.00133021	0.00206715	0.00319164	0.00490303	0.00750156	0.00924904	0.0113999	0.0140463	0.0173011	0.0213025	0.0262199	0.0322601	0.0396764	0.0487778	0.0599419	0.0736293	0.0904013	0.110942	0.136083	0.166837	0.204434	0.250364	0.310537	0.385148	0.477653	0.592336	0.734503	0.91073	1.12916	1.39987	1.73536	2.15109	2.66622	3.30444	4.09512	5.07459	6.28782	7.79045	8.57899	9.44653	10.1023	10.7444	8.985
659	0	0	0	0	0	0	0	0	0	0	0	0	0	0	0	0	0	0	0	0	0	0	0	0	0	0	1.00756	1.93018	2.03107	2.13708	2.24848	2.36553	2.48851	2.61769	2.75339	2.89591	3.04559	3.20277	3.3678	3.3819	3.39578	3.40946	3.56894	3.45677	3.96293	4.00498	4.15707	4.03711	4.03039
660	0	0	0	0	0	0	0	0	0	0	0	0	0	0	0	0	0	0	0	0	0	0	0	0	0	0	0	0	0	0	0	0	0	0	0	0	0	0	0	0	0	0	0	0	0	0	0	0	0
662	0	0	0	0	0	0	0	0	0	0	0	0	0	0	0	0	0	0	0	0	0	0	0	0	0	0	0.102102	0.106689	0.112265	0.118126	0.124283	0.130753	0.13755	0.144691	0.152191	0.160069	0.168343	0.17703	0.186152	0.186932	0.187699	0.188455	0.189198	0.189929	0.190859	0.191776	0.192682	0.193574	0.195575
666	0	0	0	0	0	0	0	0	0	0	0	0	0	0	0	0	0	0	0	0	0	0	0	0	0	0	0	0	0	0	0	0	0	0	0	0	0	0	0	0	0	0	0	0	0	0	0	0	0
670	0	0	0	0	0	0	0	0	0	0	0	0	0	0	0	0	0	0	0	0	0	0	0	0	0	0	0.270031	0.5173	0.544337	0.57275	0.602607	0.633977	0.666935	0.701557	0.737925	0.776122	0.816236	0.85836	0.90259	0.906368	0.91009	0.913754	0.917359	0.920902	0.925409	0.929859	0.934248	0.938574	0.948275
674	0	0	0	0	0	0.0969593	0.192617	0.382579	0.759741	1.50843	2.99434	2.88856	2.78569	2.68568	2.58845	2.49393	2.40205	4.61809	7.77837	10.7068	11.3591	14.4541	11.4356	8.41717	9.6972	6.9894	5.67701	5.49931	5.30304	5.07835	4.82317	4.53532	4.21252	4.20601	4.19052	4.16532	4.12961	4.08255	4.02262	3.94946	3.86208	3.75941	3.64036	3.50374	3.34832	3.1728	2.97581	2.7559	2.52605
678	0	0	0	0	0	0	0	0	0	0	0	0	0	0	0	0	0	0	0	0	0	0	0	0	0	0	0	0	0	0	0	0	0	0	0	0	0	0	0	0	0	0	0	0	0	0	0	0	0
682	0	0	0	0	0	1.33087	2.46212	4.55408	8.42193	15.5718	28.7859	41.2155	58.995	84.4185	120.76	172.691	246.87	296.764	356.463	400.516	446.119	566.417	717.949	908.555	976.116	1223.93	1682.47	1826.44	2273.37	2829.44	3521.25	4381.85	5452.33	6783.77	8439.62	10498.8	13059.2	16242.6	20200.2	25119.9	32096.8	40574.2	51286.6	51879.4	52474.6	53652.3	55006.8	56390.5	58137.1
686	0	0	0	0	0	117.748	147.104	182.008	222.064	265.014	303.731	366.84	442.507	533.048	641.14	769.851	922.652	1103.41	1316.36	1565.93	1856.61	2192.44	2576.33	3008.75	3485.44	3993.09	4500.72	4939.91	4906.61	4873.61	4840.92	4808.6	4776.7	4745.27	4714.39	4684.14	4654.63	4625.99	4598.39	4572.05	4547.23	4524.31	4503.8	4486.39	4473.11	4465.48	4465.93	4610.88	5429.87
690	0	0	0	0	0	0	0	0	0	0	0	0	0	0	0	0	0	0	0	0	0	0	0	0	0	0	0	0	0	0	0	0	0	0	0	0	0	0	0	0	0	0	0	0	0	0	0	0	0
694	0	0	0	0	0	0.448396	0.6173	0.845051	1.15167	1.56383	2.11705	2.31923	2.53992	2.7807	3.04328	3.32951	3.64135	3.98092	4.35049	4.75247	5.18945	5.66419	6.17961	6.7388	7.34506	8.00184	8.71278	9.4817	10.4535	11.5242	12.7037	14.0029	15.434	17.0101	18.7459	20.6573	22.762	25.0792	27.6302	30.4383	33.5293	36.9311	40.6748	44.7942	69.0574	106.454	164.087	252.9	391.996
702	0	0	0	0	0	0	0	0	0	0	0	0	0	0	0	0	0	0	0	0	0	0	0	0	0	0	0	0	0	0	0	0	0	0	0	0	0	0	0	0	0	0	0	0	0	0	0	0	0
703	0	0	0	0	0	26.6489	44.1168	73.0211	120.84	199.936	330.739	312.986	296.1	280.04	264.768	250.248	236.444	445.933	736.813	1118.16	1291.74	1932.98	1998.3	2162.15	2034.28	1724.3	2058.78	1770.71	1688.35	1598.66	1501.29	1395.85	1281.95	1265.6	1246.78	1225.38	1201.23	1174.21	1162.63	1170.88	1176.83	1180.21	1180.78	1178.22	1149.47	1117.77	1083	1045	1005.64
704	0	0	0	0	0	28.8066	36.1787	45.0316	55.3208	66.5539	77.0426	80.1514	83.2846	86.4255	89.5538	92.645	95.6695	98.5911	101.366	101.933	101.899	125.337	145.296	161.601	173.99	182.067	206.69	220.466	237.619	253.928	269.386	283.985	297.716	310.568	322.528	333.583	343.716	352.908	361.139	368.382	401.936	432.899	461.193	486.726	509.388	594.752	672.146	741.149	805.849
705	0	0	0	0	0	16.3166	25.7408	40.6006	64.0268	100.95	159.135	156.015	152.911	149.824	146.753	143.698	140.66	274.834	470.454	658.123	709.6	917.656	737.85	551.946	646.245	473.381	390.761	384.697	366.804	347.32	326.165	303.257	278.511	274.959	270.872	266.221	260.975	255.105	255.52	260.545	265.393	270.032	274.43	278.55	294.999	311.971	329.411	347.25	367.506
706	0	0	0	0	0	1084.8	1552.69	2213.72	3140.85	4428.69	6193.31	6490.46	6799.11	7119.42	7451.56	7795.65	8151.79	8520.03	8900.37	9146.25	9367.73	10931.5	12394.6	13758.1	15023.1	16190.8	16673.9	17099.3	17147.9	17193.2	17235.2	17273.8	17309	17341	17369.5	17394.8	17416.7	17435.4	17450.7	17462.8	18306.7	18881.9	19473.6	20082.1	20925.7	21803	22714.9	23662.8	24790.2
710	0	0	0	0	0	0	0.245665	0.673248	1.96823	6.33785	23.9591	28.3095	33.5475	39.8809	47.5748	56.9698	68.5075	82.7664	100.513	121.547	146.726	196.282	257.458	334.062	431.581	558.143	770.206	5254.89	5521.18	5766.96	5992.6	6198.49	6385	6552.51	6701.41	6832.07	6944.86	7040.18	7118.39	7179.88	7225.02	6720.96	7536.4	8836.2	11125.3	20858.5	24202.4	31833.1	40395.9
716	0	0	0	0	0	0	0	0	0.936875	1.84772	5.23874	6.36684	7.76043	9.4891	11.6432	14.3408	17.7379	22.0421	27.533	35.5855	45.2611	50.4568	56.728	64.406	73.9621	172.173	220.958	1137.94	1239.47	1345.29	1454.37	1567.14	1684.06	1805.69	1932.71	2065.89	2206.19	2354.79	2513.13	2683	2866.71	2841.78	2822.6	2810.76	2808.52	2819.19	2847.97	2903.39	3018.07
724	0	0	0	0	0	178.503	352.247	694.973	1370.91	2703.73	5671.72	5762.38	5839.68	5392.62	4961.36	4278.48	3627.87	3636.71	3636.2	3625.98	3605.59	3899.37	4570.39	5959.26	4163.6	4666.57	5752.07	5058.88	5634.52	5714.64	5794.72	5874.67	5954.41	6033.82	6112.81	6191.26	6269.04	6346.01	6422.03	6496.91	6831.92	6709.43	7203.17	7802	8076.46	8354.84	8580.01	8602.33	9089.71
732	0	0	0	0	0	0	0	0	5.71022e-05	0.000112618	0.000208185	0.000383787	0.000707299	0.00130312	0.00240011	0.00441912	0.00813381	0.0149658	0.0275265	0.0506099	0.0930145	0.170879	0.313792	0.575973	1.05673	1.93781	3.55175	6.50644	8.09497	10.0707	12.5278	15.5833	19.3827	24.1069	29.9803	37.2821	46.3588	57.6411	71.6637	89.54	111.867	139.749	174.568	171.897	171.07	170.001	168.652	166.973	165.851
736	0	0	0	0	0	949.735	1874.14	3697.64	7293.97	14385.3	47455.5	96426.4	96203.6	95855.4	95370.3	94735.8	93937.3	92958.1	91778.7	94187.9	95871.9	93773.6	91222.1	92621.9	92833.3	91707.6	89703.1	85560.9	84678.8	83679.7	82681.8	81685.5	80691.3	79699.5	78710.9	77726.3	76746.8	75773.8	74809.2	73855.5	72915.9	71995.1	71099.3	70237.5	69422.6	68674.2	68022.6	67517.9	67636.2
740	0	0	0	0	0	0	0	0	0	0	0	0	0	0	0	0	0	0	0	0	0	0	0	0	0	0	0.298164	0.420482	0.466151	0.516452	0.571834	0.632784	0.699836	0.773573	0.854631	0.943704	1.04155	1.14899	1.28099	1.40127	1.53143	1.6722	1.82438	1.81463	1.86313	1.90277	1.9313	1.9461	1.95536
744	0	0	0	0	0	0	0	0	0	0	0	0	0	0	0	0	0	0	0	0	0	0	0	0	0	0	0	0	0	0	0	0	0	0	0	0	0	0	0	0	0	0	0	0	0	0	0	0	0
748	0	0	0	0	0	0	0.0321648	0.0661111	0.144956	0.350077	0.992551	1.05903	1.13326	1.21654	1.31048	1.41707	1.53878	1.67875	1.84096	2.22623	2.68738	3.59505	4.71552	6.11858	7.90471	10.2228	14.1069	96.247	120.015	138.699	159.537	182.748	208.574	237.278	269.148	304.499	343.677	387.057	435.052	488.112	546.726	566.487	586.07	605.333	624.112	642.222	659.451	675.561	694.263
752	0	0	0	0	0	0.783848	1.46971	2.72974	6.25185	28.0324	96.7525	102.895	108.395	113.248	117.452	120.999	123.882	126.088	127.603	128.407	128.472	142.973	154.918	296.047	108.75	117.618	161.901	258.803	264.266	264.738	289.789	301.763	304.948	322.889	336.2	339.969	345.922	363.495	361.622	379.257	413.412	437.515	472.251	507.294	536.628	571.693	578.905	599.305	625.225
756	0	0	0	0	0	2.44791	6.0787	12.0736	23.9763	71.4058	354.363	335.342	317.25	300.043	283.68	268.123	253.333	477.786	789.442	1064.92	1107.21	1840.94	1784.2	2059.19	1743.67	1642.19	1633.95	1939.33	1827.22	1709.67	1586.52	1457.63	1322.83	1290.49	1256.25	1220.06	1181.86	1141.59	1130.85	1213.25	1265.04	1310.74	1353.51	1361	1384.95	1403.92	1386.89	1494.44	1618.57
760	0	0	0	208.319	337.352	535.894	840.67	1307.15	2019.1	3102.82	4748.57	6356.74	8506.78	11380.2	8877.8	6923.18	5396.93	4205.56	3275.91	5872.68	2794.93	2899.58	2998.42	3091.39	2425.92	2549.33	2916.79	2873.83	2868.18	2862.25	2856.05	2849.58	2842.84	2835.83	2828.55	2820.99	2813.16	2805.06	2796.69	2788.04	2880.58	2947.77	3016.28	3086.12	3157.32	3532.42	3900.19	3795.15	3712.67
762	0	0	0	0	0	20.9945	48.3341	111.255	256.04	589.129	1355.27	2855.35	2952.19	3048.12	3142.39	3234.08	3322.14	3405.27	3481.9	3479.11	3456.8	3413.77	3487.85	3518.75	3501.8	3429.76	3490.01	3411.84	3584.12	3702.51	3822.39	3943.44	4065.31	4187.56	4309.67	4431.02	4550.89	4668.42	4782.56	4892.07	4995.47	5090.94	5176.25	5248.65	5304.65	5339.81	5348.24	5321.97	5279.98
764	0	0	0	0	0	7.91221	20.394	30.9815	39.4015	45.192	97.3336	103.487	108.989	113.834	118.019	121.536	124.376	126.527	127.971	128.687	128.645	146.062	160.503	171.803	179.719	183.884	187.877	185.555	183.479	183.251	182.935	182.528	182.022	181.412	180.69	179.85	178.882	177.779	184.873	191.316	197.091	202.177	206.549	230.195	251.761	271.16	288.285	303.002	346.362
768	0	0	0	0	0	15.7268	21.3839	28.9841	39.1809	52.8434	71.1273	80.1041	90.1862	101.505	114.207	128.454	144.428	162.33	182.382	204.83	229.949	258.038	289.432	324.497	363.638	407.297	455.962	510.165	507.88	505.572	503.242	500.888	498.512	496.112	493.689	491.242	488.772	486.277	483.759	483.644	483.49	483.298	483.066	482.795	488.227	493.678	499.146	504.629	513.07
772	0	0	0	0	0	0	0	0	0	0	0	0	0	0	0	0	0	0	0	0	0	0	0	0	0	0	0	0	0	0	0	0	0	0	0	0	0	0	0	0	0	0	0	0	0	0	0	0	0
776	0	0	0	0	0	0	0	0	0	0.588933	0.532734	0.541809	0.550346	0.558247	0.565398	0.57167	0.576913	0.580949	0.583572	0.584532	0.583523	0.580165	0.573973	0.804133	1.11739	1.53527	2.07465	2.72818	2.81183	2.89632	2.98143	3.06691	3.15245	3.2377	3.32227	3.40565	3.48729	3.56652	3.64253	3.72469	3.80195	3.87287	3.93568	3.9882	3.94723	3.89032	3.81397	3.71339	3.60236
780	0	0	0	0	0	0	0	0	0	0	0	0	0	0	0	0	0	0	0	0	0	0	0	0	0	0	0.00299489	0.00573734	0.00836976	0.0122092	0.0178088	0.0259747	0.0378824	0.0552451	0.0805601	0.117467	0.171269	0.249695	0.364005	0.530606	0.543182	0.593748	0.64897	0.803837	0.949264	1.27538	1.54836	1.8796	2.26726
784	0	0	0	0	0	9.72348	15.2695	23.7604	36.7225	56.458	86.4348	88.2006	89.9733	91.751	93.5317	95.3132	97.093	98.8686	100.637	98.983	97.315	95.6335	93.9387	92.2306	90.5094	88.7751	117.909	145.781	132.456	127.774	123.25	118.877	114.652	110.57	106.625	102.813	99.1306	95.5728	92.1357	96.0377	100.097	104.32	108.712	113.279	118.18	123.283	128.594	134.122	140.682
788	0	0	0	0	0	95.3177	164.419	281.867	480.873	817.174	1384.17	1535.45	1681.7	1574.3	1469.18	1366.37	1265.9	1245.65	1454.99	1468.25	1480.04	1381.3	1427.78	1401.39	1099.85	1078.46	1321.15	1035.25	1027.85	1035.3	1043.43	1052.31	1062.04	1072.71	1084.45	1097.42	1111.79	1127.79	1145.68	1165.81	1188.6	1214.62	1244.6	1279.53	1320.79	1370.39	1431.32	1508.43	1619.32
792	0	0	0	0	179.229	551.012	900.049	1226.17	2372.86	3439.23	4424.24	4701.81	4965.7	4520.53	4089.56	3672.74	3269.99	3521.51	3759.61	4060.98	4345.7	3105.2	3577.61	4024.8	3164.68	3327.02	4152.51	4299.78	4314.13	4340.26	4366.26	4392.12	4417.83	4443.38	4468.76	4493.97	4518.98	4543.8	4568.4	4592.79	4722.95	4840.95	4961.5	5084.63	5210.37	5273.95	5329.92	5386.01	5473.59
795	0	0	0	0	15.6351	36.0019	82.8843	190.783	439.063	1010.25	2324.05	4896.41	5083.68	5273.18	5464.24	5656.09	5847.79	6038.27	6226.23	6169.78	6097.82	6250.45	6365.38	6441.91	6538.48	6756.93	7438.6	7734.66	8153.73	8500.9	8861.77	9236.81	9626.51	10031.3	10451.8	10888.4	11341.8	11812.3	12300.5	12807	13332.4	13877.2	14441.9	15027.1	15633.5	16261.6	16911.9	17585.1	18387.1
796	0	0	0	0	0	0	0	0	0	0	0	0	0	0	0	0	0	0	0	0	0	0	0	0	0	0	0	0	0	0	0	0	0	0	0	0	0	0	0	0	0	0	0	0	0	0	0	0	0
798	0	0	0	0	0	0	0	0	0	0	0	0	0	0	0	0	0	0	0	0	0	0	0	0	0	0	0	0	0	0	0	0	0	0	0	0	0	0	0	0	0	0	0	0	0	0	0	0	0
800	0	0	0	0	0	41.7992	52.1482	64.9562	80.808	100.426	124.704	153.59	189.109	232.77	286.416	352.308	433.206	532.488	654.278	750.035	841.92	971.232	1095.07	1213.41	1326.19	1433.39	1637.92	1832.44	1835.65	1839.21	1843.45	1848.44	1854.27	1861.04	1868.87	1877.91	1888.33	1900.32	1914.15	1930.12	1948.64	1970.19	1995.45	2025.29	2060.9	2104.02	2157.18	2224.36	2325.61
804	0	0	0	0	0	3.3862	7.79578	17.9443	41.2966	95.0204	218.591	460.538	476.353	492.058	507.536	522.653	537.244	551.113	564.026	575.693	583.155	827.596	1169.19	1094.99	1018.07	1249.82	1418.57	1680.67	1841.26	1905.74	1971.54	2038.56	2106.7	2175.85	2245.84	2316.5	2387.62	2458.94	2530.17	2639.01	2756.43	2915.54	2965.23	3280.69	3569.41	4060.73	4603.29	5386.13	6398.39
807	0	0	0	0	0	11.5127	19.0591	31.5463	52.2049	86.3755	142.884	137.068	131.567	126.249	121.108	116.139	111.336	213.047	357.158	489.316	516.696	681.147	556.67	422.135	499.852	369.492	359.469	341.252	315.719	297.129	277.333	256.286	233.94	229.551	224.763	219.559	213.924	207.839	216.127	236.94	259.689	284.548	311.706	341.369	385.441	435.094	491.023	554.006	628.522
818	0	0	0	0	0	0	0	0	0	0	0	0	0	0	0	0	0	0	0	0	0	0	0	0	0	0	0	0	0	0	0	0	0	0	0	0	0	0	0	0	0	0	0	0	0	0	0	0	0
826	0	0	0	0	0	7.40274	7.35306	32.8607	97.8842	254.328	928.747	951.925	951.371	950.53	949.392	672.322	423.068	797.107	1920.98	4312.92	6274.17	11780.2	16162.1	16273.9	8427.74	8621.49	8169.75	10475.4	10288.7	9997.93	9604.56	9109.71	8514.25	8536.57	8525.48	8481.64	8405.62	8297.89	7936.58	9572.67	10446.4	11956.3	11881.9	12291.9	12944.8	13750.5	14284.6	14863.6	15332
834	0	0	0	0	0	264.621	351.441	470.808	636.34	867.824	1194.19	1396.24	1632.03	1907.11	2227.91	2601.89	3037.71	3545.38	4136.52	4732.23	5301.17	8278.06	11127.8	13850.3	16445.7	10425	12374.4	14223.5	14299.7	14348.2	14403.2	14339.3	14277.6	14218.3	14161.9	14108.5	14058.8	14013.3	13972.6	13937.7	13909.7	13889.9	13880.4	13883.7	13903.4	13944.8	14016	14129.9	14392.1
840	0	0	0	0	0	0	0	0	0	0	0	0	0	0	0	0	0	0	0	0	0	0	0	0	0	0	0	0	0	0	0	0	0	0	0	0	0	0	0	0	0	0	0	0	0	0	0	0	0
850	0	0	0	0	0	0	0	0	0	0	0	0	0	0	0	0	0	0	0	0	0	0	0	0	0	0	2.63891	5.05539	5.53119	6.05138	6.62005	7.24168	7.92114	8.66374	9.4753	10.3621	11.3311	12.3898	13.5464	13.1907	12.8433	12.5041	12.1728	11.8493	10.9623	10.1408	9.38003	8.67557	8.06958
854	0	0	0	0	0	416.625	585.65	815.365	1119.54	1503.91	1941.25	2126.15	2325.79	2540.75	2771.43	3018.07	3280.57	3558.44	3850.65	4155.36	4469.68	4789.24	5107.52	5414.9	5697.01	5931.92	6084.5	6093.85	5993.43	5926.36	5859.22	5792.02	5724.75	5657.44	5590.11	5522.77	5455.47	5388.26	5321.2	5254.42	5188.04	5122.3	5057.48	4994.07	4932.75	4874.64	4821.56	4776.63	4773.07
858	0	0	0	0	0	0	0	0	0	0	0	0	0	0	0	0	0	0	0	0	0	0	0	0	0	0	52.8711	76.0718	81.3749	86.9926	92.9415	99.2392	105.904	112.955	120.412	128.296	136.63	145.436	156.454	168.143	231.538	314.623	427.162	713.498	952.183	1183.94	1598.98	1934.18	1993.12
860	0	0	0	0	15.411	35.4858	81.6963	188.049	432.769	995.771	2290.74	4826.23	4995.81	5164.94	5332.54	5497.33	5657.79	5812.11	5958.11	5926.75	5869.63	6002.04	6081.9	6106.06	6070.05	6015.04	6313.9	6427.43	6729.73	6983.37	7244.29	7512.48	7787.91	8070.5	8360.13	8656.66	8959.86	9269.48	9585.18	9906.54	10233.1	10564.2	10899.1	11237	11576.9	11917.5	12257.5	12595.2	13003.2
862	0	0	0	0	0	0	0	0	0	0	0	0	0	0	0	0	0	0	0	0	0	0	0	0	0	0	752.583	1216.86	1252.26	1287.87	1323.69	1359.71	1395.92	1432.32	1468.9	1505.65	1542.56	1579.62	1634.76	2048.38	2564.26	3207.25	4008.09	4566.56	4747.21	4908.82	5093.42	4725.63	4327.17
876	0	0	0	0	0	0	0	0	0	0	0	0	0	0	0	0	0	0	0	0	0	0	0	0	0	0	0	0	0	0	0	0	0	0	0	0	0	0	0	0	0	0	0	0	0	0	0	0	0
882	0	0	0	0	0	0	0	0	0	0	0.00408554	0.00592106	0.00857043	0.0123882	0.0178792	0.0257604	0.0370451	0.0531584	0.0760924	0.108609	0.1545	0.218893	0.308591	0.432327	0.60073	0.825366	1.11529	1.46649	1.51145	1.55684	1.60257	1.64849	1.69444	1.74023	1.78565	1.83042	1.87426	1.91678	1.95757	2.00166	2.04309	2.0811	2.11473	2.1428	2.30617	2.47154	2.63469	2.78917	1.93036
887	0	0	0	0	0	0.116479	0.459705	1.81397	7.15648	28.2283	111.323	254.79	582.979	1333.5	3049.26	6970.39	15928.4	15992.5	16044.5	14718.5	13426.1	11728	12096.1	12441.6	11376.9	12247.5	13340.5	11763.6	11713.9	11769.8	11825.2	11880.1	11934.3	11988.1	12041.2	12093.6	12145.4	12196.5	12246.9	12296.6	12315.9	12458.5	12601.7	12745.5	12889.9	13268.8	13638.7	13999.6	14434.2
891	0	0	0	0	0	25.4469	50.5523	100.408	199.394	395.888	785.863	737.753	697.95	660.094	624.096	589.87	557.333	1051.13	1736.77	2538.05	2841.83	3879.78	8763.98	2548.25	2237.71	2032.21	1977.08	1876.89	1788.64	1690.19	1581.82	1463.81	1336.44	1310.14	1280.26	1246.91	1210.17	1170.15	1166.95	1162.17	1155.85	1148.03	1389.6	1612.86	1818.19	2005.96	2176.55	2330.34	2481.95
894	0	0	0	0	0	170.749	245.011	349.519	494.422	690.197	940.54	1045.93	1162.14	1290.04	1430.56	1584.6	1753.02	1936.62	2136.06	2419.28	2673.2	3076.02	3430.8	3734.32	3981.82	4165.96	4216.28	4177.99	4171.21	4184.79	4200.37	4218.19	4238.53	4261.71	4288.12	4318.22	4352.58	4391.89	4437	4489	4549.28	4619.63	4702.47	4801.11	4920.2	5066.61	5250.92	5490.46	5849.71
	0	0	0	727.948	12226.8	36771.2	60756	96524.1	154725	198947	357298	357740	364976	359198	376837	398873	426912	447067	476170	519175	536191	641552	699612	700251	650875	677971	744500	829490	825561	842257	853324	869120	896704	919350	945048	991646	1.023e+06	1.03908e+06	1.09663e+06	1.12689e+06	1.18394e+06	1.23469e+06	1.27892e+06	1.31401e+06	1.30752e+06	1.3709e+06	1.46416e+06	1.57617e+06	1.72873e+06
[truncated: 108 more columns]

## Sheet: lower2
ISO1	y-10000	y-9000	y-8000	y-7000	y-6000	y-5000	y-4000	y-3000	y-2000	y-1000	y0	y100	y200	y300	y400	y500	y600	y700	y800	y900	y1000	y1100	y1200	y1300	y1400	y1500	y1600	y1700	y1710	y1720	y1730	y1740	y1750	y1760	y1770	y1780	y1790	y1800	y1810	y1820	y1830	y1840	y1850	y1860	y1870	y1880	y1890	y1900	y1910
4	0	0	0	0	0	0	0	0	0	0	0	0	0	0	0	0	0	0	0	204.636	602.386	1062.94	1571.11	1418.17	1862.57	2354.79	3406.1	3871.26	4126.52	4383.87	4650.88	4927.85	5215.11	5512.98	5821.79	6141.91	6473.67	6817.44	7173.61	7542.56	8005.66	8675.23	9394.62	10167.3	10997	12064.5	13377.6	14825.9	16208.7
8	0	0	0	0	0	0	0	0	0	0	0	0	0	0	0	0	0	0	0	14.0583	44.7356	94.8937	105.174	99.6384	140.516	119.935	112.686	186.138	185.574	183.224	178.957	172.643	164.151	167.432	170.085	172.063	173.322	173.815	181.181	188.542	194.169	208.323	223.314	248.743	274.425	304.9	335.595	372.266	403.769
12	0	0	0	0	0	0	0	0	0	0	0	0	0	0	0	0	0	0	0	187.612	610.322	994.76	1361.01	1556.44	1664.46	2013.07	3494.19	3088.87	3357.02	3636.37	3926.94	4228.74	4541.77	4866.05	5201.58	5548.37	5906.43	6275.77	6656.41	7048.34	8496.95	10012.5	11595	13244.6	14961.3	16745.2	18596.2	20514.6	22206.7
16	0	0	0	0	0	0	0	0	0	0	0	0	0	0	0	0	0	0	0	0	0	0	0	0	0	0	0	0	0	0	0	0	0	0	0	0	0	0	0	0	0	0	0	0	0	0	0	0	0
20	0	0	0	0	0	0	0	0	0	0	0	0	0	0	0	0	0	0	0	0.0779861	0.239446	0.408425	0.585175	0.769954	0.963028	1.16467	1.37516	1.59479	1.74636	1.90951	2.08504	2.27379	2.47669	2.69469	2.92883	3.1802	3.44998	3.73941	4.0498	4.38258	4.73923	5.12136	5.53066	5.96894	6.43811	6.94023	7.47745	8.0521	8.55359
24	0	0	0	0	0	0	0	0	0	0	0	0	0	0	0	0	0	0	0	17.4558	72.7603	160.971	295.661	495.976	830.007	1334.14	1979.08	11609.1	6190.47	6998.46	7868.62	8805.08	9812.55	10896.5	12063.1	13319.9	14675.5	16140.4	17727	19450.8	21331	21672.3	22028.1	22408.8	22829	23310.1	23885.4	24608.8	25241.2
28	0	0	0	0	0	0	0	0	0	0	0	0	0	0	0	0	0	0	0	0	0	0	0	0	0	0	0.529764	0.589817	0.672677	0.765653	0.869804	0.986269	1.11627	1.26109	1.42209	1.60068	1.79829	2.01634	2.25623	2.51919	2.80628	3.11819	3.24074	3.10685	2.96705	2.88668	2.97321	2.86615	2.69448
31	0	0	0	0	0	0	0	0	0	0	0	0	0	0	0	0	0	0	0	23.1599	70.8455	170.753	305.906	469.12	434.337	601.085	767.317	910.989	609.319	676.303	749.195	828.372	914.209	1007.07	1107.31	1215.24	1331.13	1455.17	1587.45	1727.93	1876.36	2032.25	2194.72	2362.41	2533.28	2704.28	2870.98	3026.79	3120.56
32	0	0	0	0	0	0	0	0	0	0	0	0	0	0	0	0	0	0	0	0	0	0	0	0	0	0	121.409	153.13	177.242	204.855	236.456	272.596	313.901	361.081	414.941	476.393	546.473	626.353	997.142	1458.21	2131.05	3112.36	4542.84	6627.04	10082.4	15109.3	21366.7	35693.6	49050.2
36	0	0	0	0	0	0	0	0	0	0	0	0	0	0	0	0	0	0	0	0	0	0	0	0	0	0	0	0	0	0	0	0	0	0	0	0	1867.29	3845.67	5346.91	6559.65	7533.16	8368.07	9978.26	15145	24785.1	36552	57582.7	84683.4	116358
40	0	0	0	0	0	0	0	0	0	0	0	0	0	0	0	0	0	0	0	5.98332	20.9416	44.8749	87.2568	179.5	137.118	259.277	314.124	733.589	790.604	850.789	914.301	981.3	1051.96	1126.45	1204.96	1287.68	1374.82	1466.59	1563.2	1664.9	1771.91	1884.5	2002.92	2059.17	2115.74	2172.63	2229.85	2287.39	2314.66
44	0	0	0	0	0	0	0	0	0	0	0	0	0	0	0	0	0	0	0	0	0	0	0	0	0	0	0.228023	0.422879	0.499008	0.587359	0.689731	0.80817	0.945002	1.10287	1.28479	1.49415	1.73484	2.01123	2.32829	2.53304	2.75222	2.7028	2.63557	2.54903	2.70036	2.82745	2.91809	2.95674	2.88568
48	0	0	0	0	0	0	0	0	0	0	0	0	0	0	0	0	0	0	0	0.0754639	0.243386	0.434516	0.648682	0.884214	1.13695	1.39851	1.65282	1.86843	2.01399	2.16654	2.32611	2.49271	2.66624	2.84656	3.03343	3.22647	3.42518	3.62886	3.8366	4.05217	4.2696	4.48691	4.70153	4.91014	5.11491	5.30396	5.46937	5.60015	5.60635
50	0	0	0	0	0	0	0	0	0	0	0	0	0	0	0	0	0	0	0	2.6451	8.79161	15.2236	22.1122	28.43	39.3529	49.4766	74.2149	103.52	110.524	117.117	123.933	130.979	138.261	145.785	153.559	161.59	169.884	178.45	187.294	199.135	211.569	224.624	222.38	239.936	258.724	278.826	300.326	323.318	343.36
51	0	0	0	0	0	0	0	0	0	0	0	0	0	0	0	0	0	0	0	0.939301	2.96108	7.37617	13.719	22.0182	21.4	31.5677	43.4437	58.0124	63.4838	69.3684	75.6945	82.4922	89.7933	97.632	106.044	115.069	124.747	135.122	146.241	158.152	170.908	184.565	199.182	214.823	231.554	249.446	268.575	289.022	306.816
52	0	0	0	0	0	0	0	0	0	0	0	0	0	0	0	0	0	0	0	0	0	0	0	0	0	0	0.130587	0.580388	0.591768	0.602479	0.612542	0.621979	0.63081	0.639056	0.646736	0.653869	0.660474	0.666568	0.772995	0.880484	0.988844	1.09789	1.20746	1.28272	1.35787	1.43284	1.50753	1.58187	1.61679
56	0	0	0	0	0	0	0	0	0	0	0	0	0	0	0	0	0	0	0	24.6021	89.4712	284.681	473.282	622.74	562.063	749.594	845.147	1085.8	1141.59	1181.33	1203.14	1205.12	1185.4	1246.93	1302.82	1352.39	1394.99	1429.95	1455.09	1471.05	1535.26	1480.63	1507.73	1525.74	1519.86	1558.16	1571.87	1568.72	1526.63
60	0	0	0	0	0	0	0	0	0	0	0	0	0	0	0	0	0	0	0	0	0	0	0	0	0	0	0.0561819	0.104192	0.124413	0.148184	0.176083	0.208775	0.24703	0.29173	0.343895	0.404697	0.475481	0.557796	0.653418	0.764387	0.893042	0.955734	1.01776	1.07781	1.13423	1.18498	1.22757	1.25895	1.2588
64	0	0	0	0	0	0	0	0	0	0	0	0	0	0	0	0	0	0	0	0.316666	0.952606	1.592	2.23482	3.16913	4.23674	6.27531	9.67957	13.7483	15.6213	16.5268	17.4607	18.424	19.4172	20.4413	21.497	22.5851	23.7065	24.862	26.0526	29.1121	32.5071	36.2729	40.4483	45.0762	51.3193	58.394	66.408	75.4829	84.6369
68	0	0	0	0	0	0	0	0	0	0	0	0	0	0	0	0	0	0	0	0	0	0	0	0	0	0	1494.97	3388.6	3592.29	3802.6	4019.69	4243.76	4474.98	4713.56	4959.7	5213.59	5475.44	5745.46	6023.88	7352.69	8968.06	9323.7	9685.53	11856.3	10445.6	8952.98	14947.6	13368.3	15541.1
70	0	0	0	0	0	0	0	0	0	0	0	0	0	0	0	0	0	0	0	4.20574	12.8184	22.592	33.3491	45.0906	57.8174	71.5305	100.908	114.399	126.101	136.3	147.123	158.601	170.773	183.673	197.343	211.824	227.157	243.391	260.571	284.049	309.416	336.815	366.4	398.333	452.176	513.007	581.705	659.263	737.052
72	0	0	0	0	0	0	0	0	0	0	0	0	0	0	0	0	0	0	0	3.32168	19.9301	40.5929	70.071	112.224	172.9	261.19	391.674	2330.62	2669.33	3019.02	3395.89	3801.79	4238.84	4709.47	5216.49	5763.23	6353.59	6992.23	7684.83	8438.3	9261.28	9417.5	9581.12	9756.8	9951.22	10174.2	10441	10776.2	11076.8
76	0	0	0	0	0	0	0	0	0	0	0	0	0	0	0	0	0	0	0	0	0	0	0	0	0	0	121.723	275.905	313.702	356.585	405.33	460.864	524.295	596.962	680.489	776.861	888.522	1140.83	1435.28	1784.57	2166.16	2839.08	3731.86	4921.82	6517.32	8674.16	11620.2	15704.1	21198.7
84	0	0	0	0	0	0	0	0	0	0	0	0	0	0	0	0	0	0	0	0	0	0	0	0	0	0	2.25485	2.73315	3.01516	3.32135	3.65362	4.014	4.40468	4.82802	5.28653	5.78294	6.32016	6.9013	7.52973	7.84005	8.1572	8.4813	8.81247	9.15086	10.339	11.6748	13.1761	14.8628	16.5385
86	0	0	0	0	0	0	0	0	0	0	0	0	0	0	0	0	0	0	0	0	0	0	0	0	0	0	0	0	0	0	0	0	0	0	0	0	0	0	0	0	0	0	0	0	0	0	0	0	0
90	0	0	0	0	0	0	0	0	0	0	0	0	0	0	0	0	0	0	0	0.0003378	0.00147279	0.00355554	0.0071808	0.0132497	0.0230834	0.0385286	0.0619543	0.095821	0.12319	0.158083	0.202496	0.258942	0.330572	0.421331	0.536151	0.681183	0.864083	1.09435	1.38376	1.47508	1.56975	1.66752	1.76805	1.87085	1.93588	1.99836	2.05733	2.11158	2.13145
92	0	0	0	0	0	0	0	0	0	0	0	0	0	0	0	0	0	0	0	0	0	0	0	0	0	0	0.417809	0.928464	1.02426	1.12828	1.24115	1.36357	1.49629	1.6401	1.79586	1.96449	2.14699	2.3444	2.55788	2.6633	2.77104	2.88114	2.99364	3.10859	3.22962	3.35347	3.48018	3.60981	3.69361
96	0	0	0	0	0	0	0	0	0	0	0	0	0	0	0	0	0	0	0	0.00531177	0.0154393	0.0298184	0.0669127	0.0905402	0.114718	0.106376	0.142545	0.176373	0.188235	0.210808	0.235666	0.263004	0.293024	0.325942	0.361978	0.401363	0.444332	0.491121	0.541962	0.57613	0.611408	0.64769	0.684832	0.722646	0.73759	0.751036	0.798351	0.842621	0.871503
100	0	0	0	0	0	0	0	0	0	0	0	0	0	0	0	0	0	0	0	45.6895	178.942	412.787	489.058	498.192	386.418	479.74	704.289	336.761	362.934	390.563	419.718	450.475	482.91	517.106	553.147	591.122	631.124	673.25	717.602	764.285	813.411	865.095	919.458	945.28	971.25	997.367	1023.63	1050.05	1062.57
104	0	0	0	0	0	0	0	0	0	0	0	0	0	0	0	0	0	0	0	5.04618	15.4393	31.0608	50.1845	59.6743	82.4539	106.376	128.291	10.9475	12.1769	13.5244	15.0003	16.6161	18.384	20.3174	22.4308	24.7399	27.2616	30.0143	33.018	36.2943	39.8666	43.7601	48.0023	54.6693	62.2252	70.7853	80.4794	91.4539	102.519
108	0	0	0	0	0	0	0	0	0	0	0	0	0	0	0	0	0	0	0	2.13817	7.58469	15.1445	24.5771	35.7622	48.5706	62.8621	78.2001	94.6392	99.7961	104.624	109.59	114.708	119.993	125.466	131.148	137.064	143.247	149.734	156.57	163.811	171.528	179.812	188.778	198.582	209.438	221.648	235.659	252.173	268.819
112	0	0	0	0	0	0	0	0	0	0	0	0	0	0	0	0	0	0	0	4.77709	14.8097	35.7495	72.191	88.7882	103.102	152.923	204.828	281.391	341.926	380.229	422.065	467.696	517.394	571.437	630.11	693.7	762.49	836.757	916.759	1002.73	1094.86	1193.29	1298.06	1409.11	1526.23	1649	1776.7	1908.22	2015.29
116	0	0	0	0	0	0	0	0	0	0	0	0	0	0	0	0	0	0	0	2.52309	7.71965	13.6668	20.0738	26.7505	33.4596	39.8911	47.4675	53.7937	55.9821	58.1431	60.2719	62.3632	64.4115	66.4108	68.3544	70.2354	72.046	73.7774	75.4205	76.9645	79.071	81.4697	83.783	85.9884	28.1623	38.4442	52.6852	72.1641	97.5075
120	0	0	0	0	0	0	0	0	0	0	0	0	0	0	0	0	0	0	0	56.0111	188.27	350.806	547.584	782.228	1057.32	1372.98	1723.9	2092.18	2142.28	2227.94	2314.02	2400.55	2487.57	2575.15	2663.33	2752.19	2841.81	2932.3	3023.77	3116.38	3210.32	3305.85	3403.3	3503.1	3605.89	3712.56	3824.48	3943.88	4021.52
124	0	0	0	0	0	0	0	0	0	0	0	0	0	0	0	0	0	0	0	0	0	0	0	0	0	0	0	0	0	0	0	0	0	0	26.1868	40.5077	62.6029	96.6662	162.362	250.308	385.609	593.635	913.284	1404.17	2162.75	2697.99	3531.12	3642.02	5319.64
132	0	0	0	0	0	0	0	0	0	0	0	0	0	0	0	0	0	0	0	0	0	0	0	0	0	0	0.79104	1.6794	1.85542	2.0718	2.30984	2.57149	2.85883	3.17412	3.51978	3.89843	4.31285	4.76604	5.2612	5.80176	6.39135	7.03383	7.7333	8.49409	9.32073	10.218	11.1908	12.2444	13.2094
136	0	0	0	0	0	0	0	0	0	0	0	0	0	0	0	0	0	0	0	0	0	0	0	0	0	0	0.320062	0.387953	0.427983	0.471445	0.518608	0.569762	0.625216	0.685306	0.75039	0.820852	0.897106	0.979596	1.0688	1.11285	1.15786	1.20387	1.25087	1.29891	1.34948	1.40123	1.45417	1.50834	1.54335
140	0	0	0	0	0	0	0	0	0	0	0	0	0	0	0	0	0	0	0	16.073	49.8364	85.7558	123.806	163.926	206.011	249.897	295.348	342.025	355.783	373.754	392.335	411.591	431.598	452.443	474.23	497.083	521.149	546.607	573.676	602.627	633.804	667.646	704.731	745.832	792.022	844.834	906.567	980.871	1059.99
144	0	0	0	0	0	0	0	0	0	0	0	0	0	0	0	0	0	0	0	1.38765	4.29996	7.78055	11.6303	13.8627	15.4154	18.4082	24.5944	30.2807	31.2929	31.4719	31.5938	31.6598	31.6709	31.6281	31.5322	31.3838	31.1832	30.9306	30.6259	30.2687	35.6246	44.7142	163.079	175.953	189.731	204.472	220.239	237.1	251.797
148	0	0	0	0	0	0	0	0	0	0	0	0	0	0	0	0	0	0	0	480.916	1489.76	2612.95	3821.25	5235.2	6910.31	8414.19	10822.2	13212.8	14088.5	14640.6	15194.5	15750.6	16309.2	16870.8	17435.8	18004.8	18578.6	19158.2	19744.6	20339.5	20944.8	21563.1	22198	22854.4	23539.3	24263.2	25041.9	25901.6	26537.6
152	0	0	0	0	0	0	0	0	0	0	0	0	0	0	0	0	0	0	0	0	0	0	0	0	0	0	164.714	373.352	398.61	424.947	452.403	481.019	510.836	541.899	574.252	607.942	643.018	679.529	717.527	814.894	924.797	1048.8	1330.82	1715.09	2071.25	2468.05	2863.5	3289.56	3832.9
156	0	0	0	0	0	0	0	0	0	0	0	0	0	0	0	0	0	0	0	607.317	1691.26	6946.98	11115.7	11089.1	12076	18280.1	22663.3	26045.7	28345.4	33807.5	37276.5	43446.6	56059.7	64009.6	73815.5	95333.9	106433	107099	128990	136758	154656	167917	179901	181264	152638	153010	156098	164223	168957
158	0	0	0	0	0	0	0	0	0	0	0	0	0	0	0	0	0	0	0	0.657276	1.9083	3.68045	5.77124	8.0952	10.5457	12.9832	13.8287	70.5168	82.3803	88.8753	95.6991	102.855	110.344	118.165	126.311	134.773	143.535	152.574	161.86	171.351	176.738	183.018	189.014	194.333	198.914	203.013	205.991	230.643	252.471
162	0	0	0	0	0	0	0	0	0	0	0	0	0	0	0	0	0	0	0	0	0	0	0	0	0	0	0	0	0	0	0	0	0	0	0	0	0	0	0	0	0	0	0	0	0	0	0	0	0
166	0	0	0	0	0	0	0	0	0	0	0	0	0	0	0	0	0	0	0	0	0	0	0	0	0	0	0	0	0	0	0	0	0	0	0	0	0	0	0	0	0	0	0	0	0	0	0	0	0
170	0	0	0	0	0	0	0	0	0	0	0	0	0	0	0	0	0	0	0	0	0	0	0	0	0	0	830.999	1883.6	2106.39	2352.05	2622.75	2920.88	3249.04	3610.04	4006.98	4443.22	4922.44	5448.62	6026.12	6659.69	7354.5	8116.17	8950.84	10082	11349.3	12768.7	14357.9	16136.5	17890
174	0	0	0	0	0	0	0	0	0	0	0	0	0	0	0	0	0	0	0	0.0331997	0.192999	0.372746	0.585514	0.823139	1.07556	1.32981	1.78199	2.20495	2.25643	2.4819	2.72504	2.98685	3.26839	3.57065	3.89464	4.24131	4.61157	5.0062	5.42585	5.871	6.34183	6.83823	7.35961	7.9048	8.47186	9.05784	9.65843	10.2675	10.7348
175	0	0	0	0	0	0	0	0	0	0	0	0	0	0	0	0	0	0	0	0	0	0	0	0	0	0	0	0	0	0	0	0	0	0	0	0	0	0	0	0	0	0	0	0	0	0	0	0	0
178	0	0	0	0	0	0	0	0	0	0	0	0	0	0	0	0	0	0	0	77.4631	257.678	474.761	732.068	1031.91	1374.55	1756.51	2167.34	2583.37	2674.48	2775.55	2876.77	2978.25	3080.07	3182.36	3285.28	3389.01	3493.79	3599.91	3707.74	3817.77	3930.6	4047.07	4168.27	4295.72	4431.55	4578.88	4742.45	4929.84	5086.83
180	0	0	0	0	0	0	0	0	0	0	0	0	0	0	0	0	0	0	0	314.062	1013.36	1900.63	2920.47	4034.19	5453.18	6911.09	7831.06	8474.88	8774.56	9054.09	9327.56	9594.63	9854.99	10108.2	10354	10591.7	10821	11041.3	11251.9	11452.1	11641.2	11818.2	11982.4	12132.5	12267.7	12386.8	12489.2	12574.9	12481.7
184	0	0	0	0	0	0	0	0	0	0	0	0	0	0	0	0	0	0	0	0	0	0	0	0	0	0	0	0	0	0	0	0	0	0	0	0	0	0	0	0	0	0	0	0	0	0	0	0	0
188	0	0	0	0	0	0	0	0	0	0	0	0	0	0	0	0	0	0	0	0	0	0	0	0	0	0	1.71333	7.30368	8.41914	9.6851	11.1201	12.7448	14.5824	16.6584	19.0016	21.6437	24.6204	27.9709	33.142	39.1802	48.9175	61.7831	76.1465	83.9303	101.498	123.609	142.3	171.171	194.677
191	0	0	0	0	0	0	0	0	0	0	0	0	0	0	0	0	0	0	0	29.0683	93.9447	210.664	246.107	245.11	362.53	323.825	371.865	409.503	402.05	398.549	391.317	379.941	363.978	374.435	383.995	392.521	399.866	405.867	411.987	424.551	435.718	445.187	452.62	457.64	480.421	500.717	517.502	529.534	528.332
192	0	0	0	0	0	0	0	0	0	0	0	0	0	0	0	0	0	0	0	0	0	0	0	0	0	0	15.9896	22.2078	26.3132	31.1313	36.7812	43.401	51.1513	60.2187	70.8195	83.2053	97.6674	114.544	134.227	157.172	198.548	249.721	313.878	334.698	355.503	381.806	410.384	440.872	573.424
196	0	0	0	0	0	0	0	0	0	0	0	0	0	0	0	0	0	0	0	0.459097	1.14222	1.83523	2.79449	4.03305	3.50025	5.16615	3.29661	3.07383	3.15542	3.23268	3.30538	3.3733	3.43617	3.4937	3.54557	3.59141	3.6308	3.66326	3.95647	4.24401	4.52317	4.79083	5.04337	5.57354	6.07272	6.53045	6.93355	7.26467	7.95593
203	0	0	0	0	0	0	0	0	0	0	0	0	0	0	0	0	0	0	0	56.9362	201.31	512.426	757.252	1076.09	1264.64	1295.3	1825.52	2010.29	1984.09	1940.5	1878.52	1797.11	1695.25	1716.25	1731.14	1739.55	1741.14	1735.55	1729.29	1715.81	1944.94	2147.86	2159.74	2213.79	2261.14	2274.56	2241.91	2232.25	2182.08
204	0	0	0	0	0	0	0	0	0	0	0	0	0	0	0	0	0	0	0	10.8065	36.3561	67.8739	106.304	152.678	204.853	261.98	303.519	320.083	306.264	292.598	279.149	265.969	253.102	240.58	228.432	216.677	205.33	194.402	183.898	176.535	169.337	162.313	155.471	148.817	154.947	161.23	167.669	174.266	178.663
208	0	0	0	0	0	0	0	0	0	0	0	0	0	0	0	0	0	0	0	26.5413	89.4712	221.559	281.562	298.915	281.031	359.805	394.402	496.367	485.912	472.056	454.478	432.953	407.228	418.012	420.828	422.097	421.739	419.674	439.679	456.369	484.863	495.75	522.346	560.164	586.784	603.481	614.525	626.062	626.33
212	0	0	0	0	0	0	0	0	0	0	0	0	0	0	0	0	0	0	0	0	0	0	0	0	0	0	0.0433374	0.0601909	0.0715996	0.0850448	0.100876	0.119502	0.141399	0.167121	0.197318	0.232743	0.274277	0.322942	0.379932	0.446634	0.524663	0.615897	0.706974	0.848362	0.930826	0.958477	0.683152	0.962084	1.13484
214	0	0	0	0	0	0	0	0	0	0	0	0	0	0	0	0	0	0	0	0	0	0	0	0	0	22.9076	26.4319	30.5925	32.492	34.4584	36.4937	38.5999	40.7792	43.0336	45.3654	47.7768	50.2702	52.848	55.5126	59.9313	64.6545	69.7016	75.0933	80.8515	106.574	140.401	185.821	244.24	305.034
218	0	0	0	0	0	0	0	0	0	0	0	0	0	0	0	0	0	0	0	0	0	0	0	0	0	0	77.3641	115.857	123.447	131.266	139.313	147.588	156.092	164.823	173.784	182.972	192.39	202.036	214.261	226.846	299.586	361.342	435.211	468.375	495.661	537.729	558.115	574.844	608.046
222	0	0	0	0	0	0	0	0	0	0	0	0	0	0	0	0	0	0	0	0	0	0	0	0	0	0	6.80533	11.1327	11.9931	12.9318	13.9731	15.1529	16.5245	18.1677	20.2028	24.9947	30.1957	35.8194	42.3444	49.444	60.5483	72.6482	85.781	96.5534	105.789	120.34	132.284	141.407	165.6
226	0	0	0	0	0	0	0	0	0	0	0	0	0	0	0	0	0	0	0	0.625351	2.08026	3.45998	4.83399	9.30334	13.2382	17.8425	21.828	26.1378	27.3143	28.5013	29.7069	30.9331	32.1823	33.457	34.7606	36.097	37.471	38.8889	40.3583	41.8893	43.4955	45.1954	47.0159	48.9976	51.2059	53.7577	56.8924	61.2345	68.6283
231	0	0	0	0	0	0	0	0	0	0	0	0	0	0	0	0	0	0	0	312.524	908.322	1461.76	1967.9	2420.37	2810.63	3126.66	3350.48	3452.39	3627.88	3803.43	3978.61	4152.95	4325.93	4497.02	4665.62	4831.11	4992.79	5149.9	5301.6	5446.96	7687.99	9946.11	12208	14458.6	16681.2	18856.4	20962.1	22971.8	24529.9
232	0	0	0	0	0	0	0	0	0	0	0	0	0	0	0	0	0	0	0	20.1674	62.2711	116.511	179.662	264.883	361.704	467.788	584.72	705.608	743.496	784.076	826.41	870.696	917.168	966.098	1017.81	1072.7	1131.23	1193.97	1261.64	1335.13	1415.58	1504.46	1603.75	1716.12	1845.34	1996.89	2179.2	2405.92	2665.95
233	0	0	0	0	0	0	0	0	0	0	0	0	0	0	0	0	0	0	0	9.05176	27.6558	46.7721	66.1449	85.4071	104.024	121.195	135.652	145.194	173.881	207.816	247.891	295.129	350.709	415.979	492.472	581.922	686.282	807.723	948.638	1088.94	1246.95	1424.09	1621.54	1840.12	1892.75	1937.74	1972.34	1992.79	1967.64
234	0	0	0	0	0	0	0	0	0	0	0	0	0	0	0	0	0	0	0	0.144441	0.443514	0.756554	1.08403	1.42641	1.78421	2.15791	2.54806	2.95518	3.84282	4.9897	6.46997	8.37868	10.8376	14.0025	18.0729	23.3036	30.0208	38.6406	49.6948	63.862	82.0081	105.237	134.958	172.963	221.539	283.597	362.843	463.991	585.308
238	0	0	0	0	0	0	0	0	0	0	0	0	0	0	0	0	0	0	0	0	0	0	0	0	0	0	0	0	0	0	0	0	0	0	0	0	0	0	0	0	0	0	0	0	0	0	0	0	0
242	0	0	0	0	0	0	0	0	0	0	0	0	0	0	0	0	0	0	0	0.212537	0.694293	1.25838	1.91302	2.66626	3.52561	4.49738	5.58577	6.79149	7.4073	8.06665	8.77226	9.52701	10.3339	11.1962	12.1173	13.1007	14.1501	15.2697	16.4635	17.7853	19.1982	20.7078	22.32	24.0414	25.3619	26.7381	28.5686	30.4413	31.933
246	0	0	0	0	0	0	0	0	0	0	0	0	0	0	0	0	0	0	0	0.406641	1.40878	2.63059	4.02753	5.54573	5.8341	6.45817	13.7372	27.956	31.3803	35.1533	39.3034	43.86	48.8533	54.3139	60.2723	66.758	73.7985	81.418	89.6355	98.462	115.135	122.35	138.038	144.854	154.02	165.282	186.758	207.247	226.304
250	0	0	0	0	0	0	0	0	0	0	0	0	0	0	0	0	0	0	0	401.045	1440.79	3637.69	5448.61	7874.68	7679.7	8915.59	10318.9	13645.2	13463	13163.2	12739	12183.5	11489.9	11618.3	11705.8	11749.9	11748.4	11698.9	12471	13105.6	13514.4	14042.3	14520.1	14631.4	14623	14813	14840.2	14752.9	14432.5
254	0	0	0	0	0	0	0	0	0	0	0	0	0	0	0	0	0	0	0	0	0	0	0	0	0	0	0.0483694	0.0791262	0.0936678	0.110655	0.130472	0.153563	0.180436	0.211677	0.247955	0.29004	0.338816	0.395294	0.46574	0.547824	0.643357	0.754422	0.883408	0.942582	1.00056	1.05595	1.10706	1.15176	1.17199
258	0	0	0	0	0	0	0	0	0	0	0	0	0	0	0	0	0	0	0	0.00353542	0.015719	0.0388095	0.0804489	0.15307	0.276706	0.483367	0.823832	1.37812	1.50618	1.6437	1.79129	1.94963	2.11943	2.30143	2.49645	2.70531	2.92894	3.16828	3.42434	3.70849	4.01324	4.33999	4.69021	5.06548	5.35831	5.66481	5.98554	6.32109	6.58507
262	0	0	0	0	0	0	0	0	0	0	0	0	0	0	0	0	0	0	0	4.52166	14.3095	28.6801	46.9433	69.123	95.2429	125.326	153.962	185.134	192.33	201.701	211.328	221.233	231.443	241.989	252.908	264.24	276.038	288.359	301.278	314.883	329.284	344.624	361.082	378.898	398.4	420.044	444.504	472.824	500.129
266	0	0	0	0	0	0	0	0	0	0	0	0	0	0	0	0	0	0	0	19.5287	67.1597	128.31	205.91	303.459	425.126	575.871	761.584	989.259	1050.12	1100.92	1153.04	1206.63	1261.81	1318.75	1377.63	1438.66	1502.12	1568.3	1637.58	1710.42	1787.39	1869.21	1956.82	2051.43	2154.73	2269.05	2397.83	2546.38	2688.01
268	0	0	0	0	0	0	0	0	0	0	0	0	0	0	0	0	0	0	0	28.2648	86.4194	208.276	373.101	572.612	529.615	733.442	935.165	1110.36	725.538	805.229	891.935	986.098	1088.16	1198.55	1317.67	1445.89	1583.51	1730.75	1887.68	2054.23	2230.08	2414.58	2606.62	2804.51	3005.69	3206.37	3401.01	3581.39	3686.34
270	0	0	0	0	0	0	0	0	0	0	0	0	0	0	0	0	0	0	0	0.0538855	0.185275	0.353899	0.56782	0.836659	1.17188	1.58711	2.09854	2.7254	2.55991	2.40092	2.24871	2.10346	1.96525	1.83409	1.70989	1.59255	1.4819	1.37775	1.27987	1.97365	3.04129	4.68322	7.20685	11.0834	17.0351	26.168	40.1754	61.6489	93.3198
275	0	0	0	0	0	0	0	0	0	0	0	0	0	0	0	0	0	0	0	0.761181	2.17981	3.46098	4.60493	5.61084	6.47647	7.19763	7.76726	8.17404	9.39142	10.7731	12.3397	14.1146	16.1239	18.3965	20.9651	23.8659	27.1397	30.8316	33.7425	36.8943	40.3047	43.9929	47.9789	52.2841	53.6725	55.0559	56.433	57.8022	58.3904
276	0	0	0	0	0	0	0	0	0	0	0	0	0	0	0	0	0	0	0	237.234	782.873	1897.87	3155.21	4483.73	4566.76	5397.08	6761.17	8065.96	8329.9	8489.17	8532.62	8449.05	8227.28	8583.75	8903.08	9181.3	9414.43	9598.5	9482.64	9272.58	9696.5	9874.72	9679.15	9574.54	9532.61	9526.08	9217.13	9074.21	10349.7
288	0	0	0	0	0	0	0	0	0	0	0	0	0	0	0	0	0	0	0	27.2185	93.5846	178.757	286.806	422.593	591.904	801.625	1059.94	1376.54	1443.53	1512.04	1582.22	1654.2	1728.15	1804.27	1882.79	1963.96	2048.1	2135.59	2226.88	2322.52	2423.2	2529.78	2643.39	2765.5	2898.09	3043.97	3207.21	3394.1	3567.88
292	0	0	0	0	0	0	0	0	0	0	0	0	0	0	0	0	0	0	0	0	0	0	0	0	0	0	0	0	0	0	0	0	0	0	0	0	0	0	0	0	0	0	0	0	0	0	0	0	0
296	0	0	0	0	0	0	0	0	0	0	0	0	0	0	0	0	0	0	0	0	0	0	0	0	0	0	0	0	0	0	0	0	0	0	0	0	0	0	0	0	0	0	0	0	0	0	0	0	0
300	0	0	0	0	0	0	0	0	0	0	0	0	0	0	0	0	0	0	0	17.2127	54.433	98.1181	149.022	204.988	180.641	237.536	411.689	467.225	507.904	550.281	594.356	640.131	687.605	736.78	787.656	840.234	894.514	950.498	1008.19	1067.58	1201.88	1351.98	1520.17	1707.88	1918.15	2174.62	2463.49	2789.68	3017.95
304	0	0	0	0	0	0	0	0	0	0	0	0	0	0	0	0	0	0	0	0	0	0	0	0	0	0	0	0	0	0	0	0	0	0	0	0	0	0	0	0	0	0	0	0	0	0	0	0	0
308	0	0	0	0	0	0	0	0	0	0	0	0	0	0	0	0	0	0	0	0	0	0	0	0	0	0	0.218957	0.358186	0.41289	0.474975	0.54535	0.625031	0.715147	0.816959	0.931872	1.06145	1.20743	1.37175	1.57382	1.72161	1.88031	2.05056	2.23308	2.21587	2.18994	2.1518	2.10035	2.03446	1.92742
312	0	0	0	0	0	0	0	0	0	0	0	0	0	0	0	0	0	0	0	0	0	0	0	0	0	0	2.20408	2.67161	2.94727	3.24657	3.57135	3.92362	4.3055	4.71931	5.1675	5.65273	6.17785	6.74591	7.36018	7.66352	7.97352	8.29033	8.61405	8.94482	9.29308	9.64944	10.014	10.3871	10.6282
316	0	0	0	0	0	0	0	0	0	0	0	0	0	0	0	0	0	0	0	0.00880027	0.0319738	0.064325	0.108259	0.166462	0.241673	0.336149	0.450442	0.58056	0.628535	0.679208	0.732658	0.788958	0.848171	0.910348	0.975523	1.04371	1.11491	1.18907	1.26612	1.34968	1.43631	1.52577	1.61774	1.71181	1.77131	1.82848	1.88243	1.93208	1.95026
320	0	0	0	0	0	0	0	0	0	0	0	0	0	0	0	0	0	0	0	0	0	0	0	0	0	0	50.2237	87.834	92.3222	96.841	101.387	105.956	110.544	115.148	119.765	124.391	129.023	133.659	139.828	146.038	174.228	206.859	245.254	267.378	285.882	294.984	292.983	288.771	293.142
324	0	0	0	0	0	0	0	0	0	0	0	0	0	0	0	0	0	0	0	39.5516	136.018	259.861	417.018	614.574	860.969	1166.25	1542.34	2003.4	2100.94	2200.7	2302.88	2407.69	2515.37	2626.22	2740.55	2858.75	2981.28	3108.69	3241.63	3380.91	3527.54	3682.76	3848.22	4026.05	4219.16	4431.62	4669.36	4941.53	5194.63
328	0	0	0	0	0	0	0	0	0	0	0	0	0	0	0	0	0	0	0	0	0	0	0	0	0	0	49.3832	82.083	91.6155	102.046	113.446	125.894	139.472	154.27	170.383	187.914	206.971	227.673	252.919	281.837	313.565	348.344	386.433	390.617	404.277	415.993	425.222	431.332	427.936
332	0	0	0	0	0	0	0	0	0	0	0	0	0	0	0	0	0	0	0	0	0	0	0	0	0	0	1.60375	3.00613	4.00341	5.32063	7.0577	9.34512	12.3531	16.3033	21.4846	28.2726	37.1556	48.7678	64.6412	85.538	102.176	115.536	130.458	139.434	146.734	148.535	158.119	167.034	177.388
334	0	0	0	0	0	0	0	0	0	0	0	0	0	0	0	0	0	0	0	0	0	0	0	0	0	0	0	0	0	0	0	0	0	0	0	0	0	0	0	0	0	0	0	0	0	0	0	0	0
336	0	0	0	0	0	0	0	0	0	0	0	0	0	0	0	0	0	0	0	0	0	0	0	0	0	0	0	0	0	0	0	0	0	0	0	0	0	0	0	0	0	0	0	0	0	0	0	0	0
340	0	0	0	0	0	0	0	0	0	0	0	0	0	0	0	0	0	0	0	0	0	0	0	0	0	0	73.5609	31.5167	34.7357	38.2051	41.9407	45.959	50.2774	54.9146	59.8898	65.2236	70.9375	77.0545	84.5254	92.5657	186.356	229.454	282.119	301.623	310.323	317.427	322.549	325.248	320.777
344	0	0	0	0	0	0	0	0	0	0	0	0	0	0	0	0	0	0	0	0	0	0	0	0	0	0	0	0	0	0	0	0	0	0	0	0	0	0	0	0	0	0	0	0	0	0	0	0	0
348	0	0	0	0	0	0	0	0	0	0	0	0	0	0	0	0	0	0	0	28.1166	111.839	284.681	420.695	622.74	702.578	749.594	704.289	930.688	990.335	1035.1	1063.15	1072.63	1061.69	1122.93	1178.92	1229.03	1272.6	1308.99	1349.34	1383.06	1521.32	1645.1	1689.83	1700.84	1718.25	1755.98	1791.4	1858.69	1860.24
352	0	0	0	0	0	0	0	0	0	0	0	0	0	0	0	0	0	0	0	9.23537	55.5811	130.081	182.659	235.544	247.486	293.336	282.869	318.601	338.203	358.481	379.453	401.139	423.56	446.738	470.693	495.449	521.027	547.452	574.748	615.5	658.659	704.357	752.73	803.922	832.082	860.74	889.903	919.579	937.387
356	0	0	0	0	0	0	0	0	0	0	0	0	0	0	0	0	0	0	0	55.8557	173.345	298.539	431.437	572.039	720.345	876.356	1040.07	1440.69	1531.61	1625.1	1721.14	1819.75	1920.92	2024.65	2130.94	2239.79	2351.21	2465.18	2581.72	2649.12	2866.71	2887.67	3241.12	3493.98	3755.23	3862.66	4297.12	4471.38	4186.78
360	0	0	0	0	0	0	0	0	0	0	0	0	0	0	0	0	0	0	0	27.9138	86.1184	156.351	236.06	324.605	495.924	698.534	866.667	1076.25	1108.91	1140.74	1171.75	1201.94	1231.32	1309.79	1388.65	1467.78	1547.07	1626.4	1731.91	1837.66	1943.5	2049.3	2154.91	2760.97	3370.92	3983.82	4598.75	5214.87	6216.83
364	0	0	0	0	0	0	0	0	0	0	0	0	0	0	0	0	0	0	0	256.092	804.1	1414.78	2085.17	1876.86	2458.07	3099	4470.21	5066.8	5492.37	5824.26	6167.74	6523.14	6890.82	7271.14	7664.46	8071.16	8491.65	8926.31	9375.56	9839.82	10677.4	11545.1	12442.9	13370.8	14328.8	16918.1	19612.1	21857.9	23868.2
368	0	0	0	0	0	0	0	0	0	0	0	0	0	0	0	0	0	0	0	35.9371	95.8966	139.943	154.04	144.133	176.28	208.47	300.877	272.975	283.961	294.952	305.948	316.949	327.956	338.967	349.984	361.006	372.033	383.065	414.775	448.762	485.18	524.191	565.965	610.687	714.997	836.651	978.473	1143.75	1318.84
372	0	0	0	0	0	0	0	0	0	0	0	0	0	0	0	0	0	0	0	20.0331	67.1034	189.787	315.521	398.553	421.547	479.74	704.289	1551.15	1821.17	1794.33	1751.05	1689.8	1608.95	1601.62	1589.3	1758.74	2065.66	2182.31	2813.68	3694.58	4490.39	5253.12	4723.46	4344.66	4378.97	4536.22	4424.02	4494.04	4654.93
376	0	0	0	0	0	0	0	0	0	0	0	0	0	0	0	0	0	0	0	1.66594	4.39798	7.30596	10.1397	12.8391	10.8186	14.996	15.992	13.0754	14.6319	16.2316	17.8691	19.5383	21.2326	22.9452	24.6685	26.3943	28.1135	29.8164	31.3057	33.1278	34.9816	36.8551	38.7323	40.5927	41.1642	41.5937	41.8493	41.8898	41.1165
380	0	0	0	0	0	0	0	0	0	0	0	0	0	0	0	0	0	0	0	40.7888	138.638	282.574	504.762	927.989	702.592	898.39	1456.38	1572.22	1672.46	1782.32	1896.15	2013.95	2135.67	2261.24	2390.56	2523.47	2659.76	2799.13	2941.22	3085.54	3330.76	3589.04	3859.87	4142.04	4257.49	4523.28	4828.67	5103.04	5322.9
384	0	0	0	0	0	0	0	0	0	0	0	0	0	0	0	0	0	0	0	47.3993	163.006	311.424	499.766	736.524	1031.81	1397.67	1848.4	2400.96	2514.71	2630.69	2749.1	2870.13	2994.04	3121.09	3251.6	3385.95	3524.58	3668.01	3816.88	3971.95	4134.2	4304.81	4485.34	4677.82	4884.98	5110.66	5360.39	5642.68	5893.64
388	0	0	0	0	0	0	0	0	0	0	0	0	0	0	0	0	0	0	0	0	0	0	0	0	0	0	7.05548	5.29003	6.57532	8.15617	10.0977	12.4791	15.396	18.9647	23.3257	28.6491	35.1403	43.0478	53.2554	57.9009	62.8522	68.1251	73.7359	72.7212	78.7379	84.7592	90.6384	96.1842	99.8311
392	0	0	0	0	0	0	0	0	0	0	0	0	0	0	0	0	0	0	0	41.9645	114.191	189.583	262.921	367.869	542.281	793.833	1166.67	1863.31	2077.45	2128.21	2175.97	2220.55	2261.81	2283.67	2301.31	2314.57	2323.27	2327.18	2409.71	2487.63	2559.97	2625.57	2683.09	2762	2828.52	2984.02	3180.24	3452.16	3687.6
398	0	0	0	0	0	0	0	0	0	0	0	0	0	0	0	0	0	0	0	395.405	1216.27	2077.44	2979.19	4281.95	5886.6	7791.17	10294.1	13153.1	13552.9	13943	14323.3	14693.8	15054.4	15405.3	15746.3	16077.4	16398.7	16710.2	17011.8	17303.5	17585.3	17857.2	18119.2	18371.3	18613.5	24531.7	29654.8	41157.9	52455.2
400	0	0	0	0	0	0	0	0	0	0	0	0	0	0	0	0	0	0	0	2.41495	6.61618	11.3926	16.4637	21.8311	19.426	29.0155	33.558	30.234	32.2004	33.5136	34.8326	36.1573	37.4877	38.8239	40.1658	41.5136	42.8672	44.2266	45.5919	46.9631	50.7826	54.8746	59.2575	63.9504	68.9739	88.2904	112.955	144.436	182.192
404	0	0	0	0	0	0	0	0	0	0	0	0	0	0	0	0	0	0	0	215.606	724.731	1388.42	2178.82	3076.57	4056.48	5083.95	6517.19	7911.19	8358.93	8708.11	9060.8	9417.3	9777.97	10143.2	10513.5	10889.5	11271.7	11661.1	12058.5	12465.2	12882.8	13313.2	13758.8	14223.1	14710.9	15228.7	15786.8	16401.2	16876.9
408	0	0	0	0	0	0	0	0	0	0	0	0	0	0	0	0	0	0	0	5.31091	17.1278	33.0224	59.1535	54.4206	73.4642	92.927	123.514	156.991	177.01	190.878	205.43	220.672	236.598	253.201	270.461	288.349	306.822	325.819	345.259	365.034	372.188	373.796	374.293	373.522	371.285	367.136	362.951	356.172	341.569
410	0	0	0	0	0	0	0	0	0	0	0	0	0	0	0	0	0	0	0	9.44159	30.4494	58.7063	105.161	96.7474	130.602	165.203	219.578	279.092	315.024	345.771	378.778	414.145	451.965	492.318	535.268	580.86	629.108	679.988	733.426	789.28	800.248	801.286	799.938	802.951	802.709	794.029	780.89	762.335	738.388
414	0	0	0	0	0	0	0	0	0	0	0	0	0	0	0	0	0	0	0	0.981618	2.94391	4.90495	6.86473	8.82325	10.7805	12.7365	28.7437	28.2236	30.0088	31.4767	32.9712	34.4926	36.0412	37.6176	39.222	40.855	42.5168	44.208	45.9289	47.6799	49.4616	51.2743	53.1186	54.9947	56.9033	58.8447	60.8194	62.8279	64.0246
417	0	0	0	0	0	0	0	0	0	0	0	0	0	0	0	0	0	0	0	79.45	240.477	417.837	603.961	793.679	980.491	1155.82	1413.61	1635.05	1775.64	1923.3	2079.47	2244.38	2418.24	2601.22	2793.45	2994.97	3205.75	3425.66	3654.46	3891.7	4136.79	4388.86	4646.72	4908.81	5173.03	5436.67	5696.11	5946.62	6101.24
418	0	0	0	0	0	0	0	0	0	0	0	0	0	0	0	0	0	0	0	2.68403	9.2333	17.3507	27.0278	38.2563	51.0279	65.3339	94.0665	127.705	135.003	142.468	150.102	157.902	165.87	174.005	182.307	190.776	199.412	208.216	238.598	270.329	303.408	337.834	373.606	410.723	449.186	488.992	530.142	572.634	560.273
422	0	0	0	0	0	0	0	0	0	0	0	0	0	0	0	0	0	0	0	3.3455	9.18873	15.7636	22.6044	29.6184	27.9882	34.1586	44.1615	40.8786	40.1382	40.6528	41.1141	41.5241	41.8847	42.1976	42.4647	42.6875	42.8679	43.0072	43.1072	43.1692	47.9344	52.3738	57.1796	62.3793	68.0021	82.5417	84.7131	95.6874	96.7955
426	0	0	0	0	0	0	0	0	0	0	0	0	0	0	0	0	0	0	0	0.144999	0.561222	1.21628	2.23398	3.80702	6.24096	10.0316	16.0065	101.345	117.06	134.44	153.664	174.939	198.509	224.662	253.745	286.174	322.456	363.218	409.245	461.534	521.372	547.057	576.014	609.282	648.376	695.597	754.625	831.756	926.539
428	0	0	0	0	0	0	0	0	0	0	0	0	0	0	0	0	0	0	0	0.865511	2.65656	4.51796	6.43359	8.38051	10.3262	12.224	14.0056	15.5671	18.7379	22.517	27.0154	32.3643	38.7173	46.2548	55.1882	65.765	78.2747	93.0554	110.501	128.398	149.029	172.788	200.12	231.527	260.141	291.974	327.34	366.574	404.685
430	0	0	0	0	0	0	0	0	0	0	0	0	0	0	0	0	0	0	0	11.9248	37.7698	66.4589	98.2268	133.325	172.024	214.613	261.403	312.725	328.28	344.228	360.605	377.448	394.802	412.719	431.258	450.489	470.496	491.379	513.257	536.279	560.629	586.539	614.31	644.339	677.166	713.548	754.598	802.037	847.527
434	0	0	0	0	0	0	0	0	0	0	0	0	0	0	0	0	0	0	0	95.2933	292.603	342.401	274.741	531.429	868.578	1286.87	1489.14	1692.52	1638.06	1713.13	1789.1	1865.97	1943.74	2022.42	2102	2182.48	2263.87	2346.16	2429.36	2704.49	2802.99	2902.85	3004.06	3106.62	3210.54	3315.81	3593.84	4194.61	4402.23
438	0	0	0	0	0	0	0	0	0	0	0	0	0	0	0	0	0	0	0	0.436869	1.41855	3.07046	3.47254	3.35691	4.83072	4.20734	4.03372	4.53265	4.46488	4.36148	4.2199	4.03749	3.81146	3.86378	3.90466	3.93317	3.94834	3.94916	4.0369	4.11917	4.19546	4.2652	4.32781	4.38268	4.42916	4.46657	4.49419	4.51128	4.45812
440	0	0	0	0	0	0	0	0	0	0	0	0	0	0	0	0	0	0	0	14.4967	44.2917	74.9072	105.934	136.783	166.599	194.099	217.252	232.536	278.479	332.829	397.01	472.665	561.68	666.214	788.722	931.983	1099.12	1293.62	1519.31	1744.01	1997.08	2280.77	2597.02	2947.1	3238.67	3542.38	3852.2	4158.29	4386.6
442	0	0	0	0	0	0	0	0	0	0	0	0	0	0	0	0	0	0	0	3.8502	12.5019	27.0604	30.604	29.585	42.5739	37.08	35.5499	39.947	40.5583	40.8359	40.7238	40.1602	39.0764	40.8295	42.5288	44.1551	45.6869	47.0999	49.1182	53.8838	58.9511	64.3102	69.9424	75.8191	74.1979	76.2477	77.733	78.6146	77.8243
446	0	0	0	0	0	0	0	0	0	0	0	0	0	0	0	0	0	0	0	0	0	0	0	0	0	0	0	0	0	0	0	0	0	0	0	0	0	0	0	0	0	0	0	0	0	0	0	0	0
450	0	0	0	0	0	0	0	0	0	0	0	0	0	0	0	0	0	0	0	51.9348	202.14	463.279	812.363	1236.22	1719.38	2546.25	3380.61	4227.12	4447.68	4650.58	4858.28	5071.35	5290.45	5516.36	5749.99	5992.46	6245.08	6509.48	6787.65	7082.1	7396	7733.45	8099.85	8502.52	8951.61	9461.75	10055	10766.4	11504.3
454	0	0	0	0	0	0	0	0	0	0	0	0	0	0	0	0	0	0	0	2.37319	8.18614	16.3777	26.7592	39.3326	54.1003	71.0643	88.9965	108.8	114.951	121.658	128.685	136.069	143.848	152.069	160.788	170.07	179.994	190.656	202.175	214.699	228.416	243.568	260.478	279.58	301.482	327.068	357.679	395.481	438.473
458	0	0	0	0	0	0	0	0	0	0	0	0	0	0	0	0	0	0	0	1.24644	3.80847	7.31879	11.4452	16.018	20.8253	25.5883	34.0235	41.5431	44.1268	46.7247	49.3275	51.9254	54.5076	57.0622	59.5764	62.036	64.4251	66.7263	70.549	74.2564	77.811	81.1691	84.2796	108.852	132.594	155.131	175.993	191.059	212.5
462	0	0	0	0	0	0	0	0	0	0	0	0	0	0	0	0	0	0	0	0.00286661	0.0124806	0.0300784	0.0606152	0.111531	0.193578	0.321386	0.512614	0.781889	0.81747	0.852951	0.888236	0.92322	0.957781	0.991781	1.02506	1.05745	1.08874	1.1187	1.14704	1.21276	1.27912	1.34552	1.41117	1.47501	1.62099	1.77307	1.92825	2.08161	2.19611
466	0	0	0	0	0	0	0	0	0	0	0	0	0	0	0	0	0	0	0	78.022	256.722	479.175	747.505	1084.92	1534.13	2044.23	2864.46	3861.37	4103.27	4325.86	4556.48	4795.81	5044.62	5303.83	5574.48	5857.82	6155.31	6468.7	6800.12	7152.19	7528.15	7932.12	8369.45	8847.19	9374.99	9966.41	10641.5	11431.4	12226.7
470	0	0	0	0	0	0	0	0	0	0	0	0	0	0	0	0	0	0	0	0	0	0	0	0	0	0	0	0	0	0	0	0	0	0	0	0	0	0	0	0	0	0	0	0	0	0	0	0	0
474	0	0	0	0	0	0	0	0	0	0	0	0	0	0	0	0	0	0	0	0	0	0	0	0	0	0	0.647065	0.485154	0.603029	0.74801	0.926072	1.14447	1.41198	1.73927	2.13922	2.62743	3.22275	3.94795	4.8841	5.34869	5.84823	6.38488	6.9609	6.91495	7.07812	7.20321	7.28211	7.30557	7.16839
478	0	0	0	0	0	0	0	0	0	0	0	0	0	0	0	0	0	0	0	0.000416935	0.00263327	0.00943589	0.0282638	0.0808353	0.215561	0.54772	1.47463	3.82	8.03222	16.7943	35.0766	73.1909	152.592	317.9	661.884	1377.38	2865.2	5958.53	12389.7	12884.7	13401.6	13944.1	14516.8	15125.9	15779.7	16489.8	17272.8	18154.4	18926.6
480	0	0	0	0	0	0	0	0	0	0	0	0	0	0	0	0	0	0	0	0	0	0	0	0	0	0	1.30745	1.93696	2.46868	3.1417	3.99272	5.06779	6.42468	8.13583	10.292	13.0069	16.4229	20.718	26.1151	32.8928	41.3993	66.9533	58.3466	54.2298	51.6432	53.4084	49.7294	44.1513	37.4883
484	0	0	0	0	0	0	0	0	0	0	0	0	0	0	0	0	0	0	0	0	0	0	0	0	0	0	2604.48	5903.48	6524.37	7156.74	7799.15	8450.23	9108.67	9773.24	10442.8	11116.1	11792.1	12469.9	13148.5	13826.9	14504.3	15179.8	15852.7	16522.3	17187.8	17848.6	21954	25280.7	28663.7
492	0	0	0	0	0	0	0	0	0	0	0	0	0	0	0	0	0	0	0	0	0	0	0	0	0	0	0	0	0	0	0	0	0	0	0	0	0	0	0	0	0	0	0	0	0	0	0	0	0
496	0	0	0	0	0	0	0	0	0	0	0	0	0	0	0	0	0	0	0	871.791	2794.2	6209.34	10973.5	15375	13604.8	16490.7	19515.6	22684.8	24063.1	25715.1	27442.7	29249.1	31137.3	33110.6	35172.3	37325.9	39575	41923.3	44374.7	46933.2	49882.3	53397.6	57123.1	61070.4	65251.5	70359.3	81225.7	93722	106678
498	0	0	0	0	0	0	0	0	0	0	0	0	0	0	0	0	0	0	0	0.659406	2.04843	4.95699	10.0407	12.3973	14.4698	21.6133	29.2477	40.8436	27.7554	30.9365	34.4259	38.2492	42.434	47.0094	52.0064	57.4577	63.3977	69.8625	76.8896	84.5179	92.7874	101.739	111.412	121.849	133.087	145.164	158.111	171.956	184.279
500	0	0	0	0	0	0	0	0	0	0	0	0	0	0	0	0	0	0	0	0.000105045	0.00061082	0.00196683	0.00529853	0.0130425	0	0	0	0.299804	0.333737	0.370827	0.411315	0.455454	0.503507	0.555745	0.612449	0.673903	0.740391	0.812198	0.889594	0.929106	0.968808	1.00852	1.04801	1.08702	1.12648	1.16485	1.20164	1.23627	1.25148
504	0	0	0	0	0	0	0	0	0	0	0	0	0	0	0	0	0	0	0	74.5242	242.401	384.906	511.962	737.109	809.048	799.004	1386.7	1225.7	1332.09	1442.92	1558.2	1677.93	1802.12	1930.76	2063.87	2201.44	2343.48	2490	2640.99	2796.46	3387.59	4006.15	4652.14	5325.6	6026.54	6754.98	7510.95	8294.47	8986.79
508	0	0	0	0	0	0	0	0	0	0	0	0	0	0	0	0	0	0	0	2.62848	11.6112	32.2934	68.4138	126.638	216.971	354.84	619.263	4116.89	4775.18	5494.86	6278.53	7128.79	8048.26	9039.52	10105.2	11247.9	12470.1	13774.6	15163.9	16640.6	18218	20000.5	21910.1	23948	24971.4	25973.8	26945.1	27873.9	28372.3
512	0	0	0	0	0	0	0	0	0	0	0	0	0	0	0	0	0	0	0	10.0966	30.3797	50.7821	71.3027	91.9404	112.694	133.563	181.592	237.118	250.325	263.822	277.606	291.68	306.043	320.695	335.637	350.869	366.391	382.203	398.305	414.698	437.841	462.707	488.664	515.754	544.022	572.68	617.009	664.426	705.806
516	0	0	0	0	0	0	0	0	0	0	0	0	0	0	0	0	0	0	0	10.6713	38.8177	79.0625	136.477	218.579	336.757	508.719	762.861	4539.34	5328.96	6213.83	7202.86	8305.72	9532.88	10895.7	12406.5	14078.7	15926.6	17966	20213.9	22688.5	25410	26312.1	27192.4	28043.9	28859.2	29629.7	30345.9	30997.2	31160.2
520	0	0	0	0	0	0	0	0	0	0	0	0	0	0	0	0	0	0	0	0	0	0	0	0	0	0	0	0	0	0	0	0	0	0	0	0	0	0	0	0	0	0	0	0	0	0	0	0	0
524	0	0	0	0	0	0	0	0	0	0	0	0	0	0	0	0	0	0	0	3.85103	11.5795	19.8789	28.4379	37.0392	45.4094	53.1881	71.2726	88.1863	92.9197	97.669	102.422	107.167	111.889	116.575	121.207	125.769	130.243	134.608	138.841	142.918	148.905	156.098	52.4601	69.8864	92.91	125.154	168.077	218.637	293.836
528	0	0	0	0	0	0	0	0	0	0	0	0	0	0	0	0	0	0	0	23.5804	82.54	210.102	261.971	439.092	442.309	651.468	869.478	1240.92	1211.27	1172.18	1123.26	1064.16	994.485	997.777	997.75	994.272	987.213	976.442	966.684	953.362	1009.16	1065.57	1102.03	1139.99	1175.6	1243.16	1308.65	1374.47	1428.49
530	0	0	0	0	0	0	0	0	0	0	0	0	0	0	0	0	0	0	0	0	0	0	0	0	0	0	0	0	0	0	0	0	0	0	0	0	0	0	0	0	0	0	0	0	0	0	0	0	0
533	0	0	0	0	0	0	0	0	0	0	0	0	0	0	0	0	0	0	0	0	0	0	0	0	0	0	0.0102882	0.0232039	0.0259802	0.0290456	0.0324282	0.0361585	0.04027	0.0447992	0.0497859	0.0552737	0.06131	0.0679468	0.0752404	0.0795106	0.0839617	0.0886006	0.0934343	0.108607	0.135699	0.225548	0.276209	0.361852	0.356441
540	0	0	0	0	0	0	0	0	0	0	0	0	0	0	0	0	0	0	0	0.844502	2.82355	5.24453	8.18249	11.7238	15.9679	21.0288	27.0376	34.1445	37.3899	40.8831	44.6414	48.683	53.0273	57.6951	62.7085	68.0909	73.8674	80.0646	86.7109	94.097	102.038	110.572	119.741	129.589	137.366	145.527	154.089	163.071	170.241
548	0	0	0	0	0	0	0	0	0	0	0	0	0	0	0	0	0	0	0	0	0	0	0.00564395	0.010854	0.0198423	0.035074	0.060529	0.102599	0.112285	0.122705	0.133907	0.145946	0.158878	0.172764	0.187668	0.203658	0.220807	0.239194	0.2589	0.280791	0.304311	0.329572	0.356695	0.38581	0.408726	0.432758	0.457955	0.484368	0.505373
554	0	0	0	0	0	0	0	0	0	0	0	0	0	0	0	0	0	0	0	0	0	0	17.3331	27.9394	34.2485	162.374	328.816	533.894	521.36	536.204	550.715	564.896	578.753	592.292	605.516	618.43	631.04	643.35	655.365	786.053	942.112	1128.37	1350.57	1615.51	1931.27	2307.45	3149.03	4026.87	4876.56
558	0	0	0	0	0	0	0	0	0	0	0	0	0	0	0	0	0	0	0	0	0	0	0	0	0	0	64.3538	48.2509	55.0783	62.7431	71.3379	80.9645	91.7356	103.775	117.219	132.218	148.936	167.557	190.367	215.921	270.435	332.977	409.403	417.388	421.915	456.795	492.584	527.116	551.7
562	0	0	0	0	0	0	0	0	0	0	0	0	0	0	0	0	0	0	0	97.6552	307.464	549.213	820.041	1167.52	1524.16	1968.03	2640.91	3409.71	3610.1	3779.24	3952.32	4129.7	4311.79	4499.07	4692.09	4891.51	5098.09	5312.74	5536.58	5770.98	6017.6	6278.6	6556.71	6855.55	7180.03	7537.01	7936.53	8394.05	8818.64
566	0	0	0	0	0	0	0	0	0	0	0	0	0	0	0	0	0	0	0	400.763	1359.89	2346.84	3373.76	4674.68	6042.75	7413.48	10149.4	13530.2	14091.1	14585.7	15076.5	15563.6	16047	16526.9	17003.6	17477.2	17948.3	18417.4	18885.2	19352.9	19821.9	20294.2	20772.6	21261.4	21766.5	22297.1	22867.2	23500.3	23920.9
570	0	0	0	0	0	0	0	0	0	0	0	0	0	0	0	0	0	0	0	0.000457345	0.00202312	0.00496735	0.0102343	0.0193422	0.0347049	0.0601213	0.101513	0.16802	0.183424	0.19994	0.217638	0.236596	0.256892	0.278612	0.301847	0.326692	0.353247	0.38162	0.411924	0.445513	0.481475	0.519964	0.561144	0.605189	0.652283	0.70262	0.741307	0.781696	0.813104
574	0	0	0	0	0	0	0	0	0	0	0	0	0	0	0	0	0	0	0	0	0	0	0	0	0	0	0	0	0	0	0	0	0	0	0	0	0	0	0	0	0	0	0	0	0	0	0	0	0
578	0	0	0	0	0	0	0	0	0	0	0	0	0	0	0	0	0	0	0	1.24988	3.82017	8.28974	14.0327	20.2662	11.7369	26.019	34.6615	42.4651	45.1837	47.9818	50.8565	53.8039	56.819	59.8958	63.0264	66.2015	69.4096	72.6365	75.8653	83.549	95.2884	107.445	122.059	137.681	150.27	158.571	166.911	182.941	187.416
580	0	0	0	0	0	0	0	0	0	0	0	0	0	0	0	0	0	0	0	0	0	0	0	0	0	0	0	0	0	0	0	0	0	0	0	0	0	0	0	0	0	0	0	0	0	0	0	0	0
583	0	0	0	0	0	0	0	0	0	0	0	0	0	0	0	0	0	0	0	0	0	0	0	0	0	0	0	0	0	0	0	0	0	0	0	0	0	0	0	0	0	0	0	0	0	0	0	0	0
584	0	0	0	0	0	0	0	0	0	0	0	0	0	0	0	0	0	0	0	0	0	0	0	0	0	0	0	0	0	0	0	0	0	0	0	0	0	0	0	0	0	0	0	0	0	0	0	0	0
585	0	0	0	0	0	0	0	0	0	0	0	0	0	0	0	0	0	0	0	0.0077487	0.0291035	0.0607277	0.10644	0.17133	0.26216	0.387879	0.560301	0.794973	0.870419	0.951615	1.03896	1.13287	1.2338	1.34224	1.45868	1.58367	1.7178	1.86168	2.01596	2.1874	2.37168	2.56971	2.78244	3.0109	3.19118	3.38033	3.57876	3.78688	3.95288
586	0	0	0	0	0	0	0	0	0	0	0	0	0	0	0	0	0	0	0	39.8453	128.528	215.357	301.592	372.183	491.639	585.379	822.758	1058.43	1101.77	1156.4	1211.73	1267.7	1324.27	1381.35	1438.87	1496.75	1554.89	1613.16	1671.46	1729.63	1787.52	1844.93	1901.68	1957.52	2012.18	2065.37	2116.72	2165.84	2183.4
591	0	0	0	0	0	0	0	0	0	0	0	0	0	0	0	0	0	0	0	0	0	0	0	0	0	0	28.9163	21.6808	24.3144	27.2121	30.3969	33.8935	37.7288	41.9315	46.5327	51.566	57.0674	63.0758	70.4053	83.301	98.403	116.069	136.714	151.22	163.515	170.511	187.701	205.044	240.849
598	0	0	0	0	0	0	0	0	0	0	0	0	0	0	0	0	0	0	0	5.99042	18.2175	30.6676	43.1715	55.4915	67.2878	78.058	87.016	92.8128	95.6078	98.2904	100.853	103.287	105.584	107.733	109.723	111.541	113.174	114.603	115.812	116.778	117.475	117.874	117.939	117.624	116.719	115.314	113.32	110.614	105.627
600	0	0	0	0	0	0	0	0	0	0	0	0	0	0	0	0	0	0	0	0	0	0	0	0	0	0	420.802	477.865	522.874	569.981	619.198	670.536	724.008	779.627	837.404	897.352	959.483	1023.81	1195.86	1376.43	1565.56	1763.32	1969.73	2103.94	2242.64	2385.84	2533.58	2685.89	3505.54
604	0	0	0	0	0	0	0	0	0	0	0	0	0	0	0	0	0	0	0	0	0	0	0	0	0	0	613.085	1061.14	1118.31	1176.16	1234.63	1293.68	1353.27	1413.37	1473.93	1534.92	1596.29	1658.02	1739.14	1821.19	2239.16	2700.74	3252.85	3592.99	3880.96	4360.44	5422.57	6052.24	6110.93
608	0	0	0	0	0	0	0	0	0	0	0	0	0	0	0	0	0	0	0	0.656152	1.90466	5.50883	10.6918	17.1535	24.5238	32.3241	55.0218	87.4982	95.3734	103.399	111.544	119.778	128.065	136.369	144.647	152.856	160.946	168.862	176.54	183.913	212.517	254.979	305.043	364.009	420.628	472.391	519.721	572.154	655.658
612	0	0	0	0	0	0	0	0	0	0	0	0	0	0	0	0	0	0	0	0	0	0	0	0	0	0	0	0	0	0	0	0	0	0	0	0	0	0	0	0	0	0	0	0	0	0	0	0	0
616	0	0	0	0	0	0	0	0	0	0	0	0	0	0	0	0	0	0	0	29.5395	95.2786	183.727	370.329	706.824	818.155	1035.45	1377.39	1683.1	1800.4	1932.64	2070.58	2214.19	2363.38	2517.98	2677.76	2842.37	3011.37	3184.15	3359.92	3537.68	3767.96	4082.53	4410.87	5036.84	5634.51	6543.23	7386.57	7795.19	8000.89
620	0	0	0	0	0	0	0	0	0	0	0	0	0	0	0	0	0	0	0	6.03387	21.0231	42.2383	68.1306	116.15	96.8517	156.874	266.592	280.062	374.234	396.243	414.053	431.856	449.598	467.866	485.966	503.819	521.332	538.398	553.668	568.352	601.214	635.702	651.796	697.748	750.22	804.727	871.368	913.517	952.42
624	0	0	0	0	0	0	0	0	0	0	0	0	0	0	0	0	0	0	0	1.87236	6.43865	12.3003	19.7381	29.0871	40.7465	55.1912	72.9854	94.7986	100.14	105.694	111.481	117.525	123.852	130.495	137.492	144.887	152.733	161.094	170.051	179.7	190.167	201.609	214.237	228.329	244.277	262.637	284.249	310.451	339.065
626	0	0	0	0	0	0	0	0	0	0	0	0	0	0	0	0	0	0	0	0.260181	0.96813	2.00097	3.47328	5.53565	8.38512	12.2787	17.5505	24.6336	26.0688	27.5467	29.0684	30.635	32.2475	33.9071	35.6149	37.372	39.1798	41.0393	42.9519	47.937	53.4616	59.5813	66.3577	73.8584	78.8716	84.1769	89.7903	95.7283	100.678
630	0	0	0	0	0	0	0	0	0	0	0	0	0	0	0	0	0	0	0	0	0	0	0	0	0	0	0.687073	1.14512	1.52139	2.01829	2.67382	3.53775	4.67525	6.17163	8.13846	10.7216	14.1117	18.5577	24.3844	32.0159	38.9214	45.8888	57.974	71.0535	85.5743	100.449	115.163	131.515	160.306
634	0	0	0	0	0	0	0	0	0	0	0	0	0	0	0	0	0	0	0	0.0798374	0.248452	0.429533	0.623763	0.83186	1.05457	1.29269	1.54704	4.4218	4.82986	5.26776	5.73749	6.24113	6.7809	7.35917	7.97844	8.64138	9.3508	10.1097	10.9213	11.8033	12.7472	13.7571	14.8372	15.9921	16.5519	17.1215	17.7012	18.291	18.6447
638	0	0	0	0	0	0	0	0	0	0	0	0	0	0	0	0	0	0	0	0.00992993	0.0360289	0.0723617	0.121529	0.186359	0.269572	0.37302	0.495928	0.630633	0.77686	0.955071	1.17188	1.43518	1.75436	2.14053	2.60684	3.16875	4.11184	5.06515	5.97226	6.8425	7.51632	8.77277	9.17896	13.7017	15.1085	14.7268	13.3289	13.3912	12.8157
642	0	0	0	0	0	0	0	0	0	0	0	0	0	0	0	0	0	0	0	49.2041	178.942	427.022	525.869	747.288	878.223	1199.35	1126.86	1551.15	1782.43	1818.88	1838.4	1837.46	1812.03	1918.91	2025.78	2131.67	2235.43	2335.71	2474.51	2615.3	2854.37	2976.42	3095.17	3243.04	3371.39	3481.25	3568.13	3640.29	3712
643	0	0	0	0	0	0	0	0	0	0	0	0	0	0	0	0	0	0	0	310.069	960.076	2314.06	4664.06	5922.15	6854.27	9777.65	13003.7	15001.5	17446.3	19970.7	22565	25218.7	27920.4	30658.1	33418.5	36187	38947.8	41683.1	44373.3	47583.7	51008.2	60417.8	65303.5	74555.9	80062.4	90860.3	102394	111996	132739
646	0	0	0	0	0	0	0	0	0	0	0	0	0	0	0	0	0	0	0	2.03794	7.24123	14.485	23.5537	34.348	46.7623	60.6836	75.7149	91.938	96.5904	101.257	106.055	110.998	116.1	121.38	126.857	132.557	138.508	144.746	151.312	158.26	165.655	173.579	182.142	191.488	201.813	213.396	226.651	242.22	257.783
654	0	0	0	0	0	0	0	0	0	0	0	0	0	0	0	0	0	0	0	0.000965897	0.00363284	0.00759065	0.0133223	0.0214726	0.0328992	0.048739	0.0704943	0.100146	0.130225	0.169089	0.21925	0.28393	0.367252	0.474498	0.612424	0.789671	1.01728	1.30936	1.68393	2.16397	2.77883	3.56593	4.57296	5.86071	6.67255	7.59254	8.38682	9.20952	7.7996
659	0	0	0	0	0	0	0	0	0	0	0	0	0	0	0	0	0	0	0	0	0	0	0	0	0	0	0.347433	0.772073	0.851737	0.938231	1.03209	1.13389	1.24425	1.36384	1.49336	1.63359	1.78535	1.94951	2.12703	2.21469	2.30428	2.39583	2.59559	2.60051	3.08228	3.21896	3.45115	3.46038	3.49866
660	0	0	0	0	0	0	0	0	0	0	0	0	0	0	0	0	0	0	0	0	0	0	0	0	0	0	0	0	0	0	0	0	0	0	0	0	0	0	0	0	0	0	0	0	0	0	0	0	0
662	0	0	0	0	0	0	0	0	0	0	0	0	0	0	0	0	0	0	0	0	0	0	0	0	0	0	0.0352075	0.0426757	0.0470791	0.05186	0.057048	0.062675	0.0687752	0.0753852	0.0825445	0.0902955	0.0986836	0.107758	0.11757	0.122415	0.127367	0.132428	0.137599	0.142883	0.148446	0.154138	0.159962	0.165921	0.169772
666	0	0	0	0	0	0	0	0	0	0	0	0	0	0	0	0	0	0	0	0	0	0	0	0	0	0	0	0	0	0	0	0	0	0	0	0	0	0	0	0	0	0	0	0	0	0	0	0	0
670	0	0	0	0	0	0	0	0	0	0	0	0	0	0	0	0	0	0	0	0	0	0	0	0	0	0	0.093114	0.20692	0.22827	0.251451	0.276606	0.30389	0.333467	0.365517	0.40023	0.437812	0.478483	0.52248	0.570057	0.59355	0.617561	0.642098	0.66717	0.692789	0.719763	0.747363	0.775602	0.804492	0.823168
674	0	0	0	0	0	0	0	0	0	0	0	0	0	0	0	0	0	0	0	0.212015	0.688431	1.49011	1.68524	1.62913	2.34438	2.04185	1.95759	2.19972	2.22386	2.22952	2.21391	2.17396	2.10626	2.19136	2.27283	2.34967	2.42081	2.48503	2.5406	2.58637	2.6207	2.64175	2.64753	2.63584	2.60425	2.5501	2.47048	2.3622	2.19278
678	0	0	0	0	0	0	0	0	0	0	0	0	0	0	0	0	0	0	0	0	0	0	0	0	0	0	0	0	0	0	0	0	0	0	0	0	0	0	0	0	0	0	0	0	0	0	0	0	0
682	0	0	0	0	0	0	0	0	0	0	0	0	0	0	0	0	0	0	0	7.931	27.0375	58.3935	105.803	175.849	235.984	357.552	580.162	730.574	953.348	1242.19	1616.31	2100.39	2726.17	3534.4	4577.42	5922.38	7655.38	9886.78	12758	16450.2	21780	28511.6	37299.4	39028.5	40813.6	43122.4	45666	48334.7	50467
686	0	0	0	0	0	0	0	0	0	0	0	0	0	0	0	0	0	0	0	31.0086	112.522	226.025	379.669	582.339	842.634	1166.52	1551.97	1975.96	2057.61	2139.63	2222.06	2304.95	2388.35	2472.33	2556.96	2642.34	2728.58	2815.82	2904.25	2994.08	3085.62	3179.24	3275.49	3375.08	3479.08	3589.08	3707.57	3952.18	4713.5
690	0	0	0	0	0	0	0	0	0	0	0	0	0	0	0	0	0	0	0	0	0	0	0	0	0	0	0	0	0	0	0	0	0	0	0	0	0	0	0	0	0	0	0	0	0	0	0	0	0
694	0	0	0	0	0	0	0	0	0	0	0	0	0	0	0	0	0	0	0	0.0941083	0.314512	0.583937	0.910679	1.30428	1.77573	2.33762	3.00441	3.79268	4.38373	5.05939	5.83119	6.71214	7.71699	8.86242	10.1673	11.6529	13.3432	15.2656	17.4507	19.9331	22.752	25.9516	29.5816	33.6984	53.7113	85.561	136.223	216.771	340.28
702	0	0	0	0	0	0	0	0	0	0	0	0	0	0	0	0	0	0	0	0	0	0	0	0	0	0	0	0	0	0	0	0	0	0	0	0	0	0	0	0	0	0	0	0	0	0	0	0	0
703	0	0	0	0	0	0	0	0	0	0	0	0	0	0	0	0	0	0	0	22.1419	78.2873	199.277	294.487	418.481	491.805	503.727	709.923	708.283	708.017	701.853	689.117	669.085	640.973	659.387	676.222	691.238	704.172	714.739	734.291	766.77	798.56	829.34	858.747	886.37	894.032	898.399	899.095	895.716	872.964
704	0	0	0	0	0	0	0	0	0	0	0	0	0	0	0	0	0	0	0	2.01847	6.17572	12.9213	21.4121	31.2775	42.0634	53.1881	71.2726	88.1863	99.6466	111.481	123.653	136.125	148.858	161.808	174.93	188.175	201.489	214.814	228.088	241.241	272.743	304.199	335.413	366.161	396.191	478.025	558.008	635.27	699.532
705	0	0	0	0	0	0	0	0	0	0	0	0	0	0	0	0	0	0	0	13.0321	43.0061	94.6037	108.736	106.828	156.235	138.291	134.745	153.879	153.821	152.482	149.715	145.363	139.255	143.256	146.913	150.176	152.986	155.281	161.381	170.623	180.088	189.753	199.585	209.551	229.443	250.743	273.474	297.643	319.02
706	0	0	0	0	0	0	0	0	0	0	0	0	0	0	0	0	0	0	0	181.114	567.741	1126.96	1826.57	2662.85	3631.95	4729.9	5749.64	6839.7	7191.07	7548.25	7911.24	8280	8654.52	9034.78	9420.76	9812.45	10209.8	10612.8	11021.5	11435.8	12422.4	13268.4	14162.6	15107.6	16275.6	17523.9	18857.6	20282.4	21519.6
710	0	0	0	0	0	0	0	0	0	0	0	0	0	0	0	0	0	0	0	2.40688	8.89246	20.2353	37.9412	64.6572	104.338	163.053	265.588	2101.96	2315.33	2531.84	2750.7	2971.18	3192.5	3413.92	3634.66	3853.99	4071.13	4285.32	4495.82	4701.87	4902.69	4722.84	5481.02	6647.42	8652.99	16764.8	20092.5	27285.5	35066.4
716	0	0	0	0	0	0	0	0	0	0	0	0	0	0	0	0	0	0	0	0.704663	2.7431	5.20173	8.35992	12.4657	17.8809	50.2977	76.1923	455.177	519.776	590.613	667.581	751.191	842.03	940.782	1048.25	1165.37	1293.29	1433.35	1587.24	1757.01	1945.27	1996.92	2052.8	2114.52	2184.4	2265.89	2364.35	2488.62	2619.9
724	0	0	0	0	0	0	0	0	0	0	0	0	0	0	0	0	0	0	0	71.8016	218.52	401.996	673.532	1153.41	1006.58	1363.27	1983.47	2023.55	2362.86	2508.87	2659.87	2815.96	2977.2	3143.67	3315.42	3492.51	3674.96	3862.79	4056.02	4254.62	4635.95	4714.73	5238.67	5869.4	6281.69	6715.11	7123.03	7373.42	7890.5
732	0	0	0	0	0	0	0	0	0	0	0	0	0	0	0	0	0	0	0	0.00100218	0.00563724	0.0176164	0.046243	0.111479	0.255472	0.566103	1.22474	2.60258	3.39466	4.42127	5.75045	7.46968	9.69137	12.5599	16.2605	21.0309	27.1758	35.0859	45.2613	58.6368	75.9096	98.2023	126.958	129.317	133.055	136.637	140.013	143.12	143.97
736	0	0	0	0	0	0	0	0	0	0	0	0	0	0	0	0	0	0	0	1865.11	5810.42	9667.38	13443.3	17926.8	22443.2	26791	30932.1	34224.3	35510.5	36737.4	37952.3	39155.1	40345.6	41524.1	42690.6	43845.6	44989.5	46123.2	47247.9	48365.5	49478.7	50591.2	51708.6	52839.2	53995.4	55196	56471.6	57872.5	58712.9
740	0	0	0	0	0	0	0	0	0	0	0	0	0	0	0	0	0	0	0	0	0	0	0	0	0	0	0.102815	0.168193	0.195483	0.226735	0.262481	0.303318	0.349918	0.403038	0.463529	0.532346	0.610563	0.699387	0.809044	0.917646	1.03918	1.17506	1.32682	1.36514	1.4491	1.52933	1.60335	1.66809	1.69739
744	0	0	0	0	0	0	0	0	0	0	0	0	0	0	0	0	0	0	0	0	0	0	0	0	0	0	0	0	0	0	0	0	0	0	0	0	0	0	0	0	0	0	0	0	0	0	0	0	0
748	0	0	0	0	0	0	0	0	0	0	0	0	0	0	0	0	0	0	0	0.0440837	0.162872	0.370624	0.694919	1.18424	1.91103	2.98643	4.86444	38.4988	50.3291	60.8923	73.2301	87.5984	104.287	123.624	145.979	171.769	201.466	235.6	274.77	319.648	370.993	398.072	426.233	455.388	485.421	516.178	547.469	579.052	602.668
752	0	0	0	0	0	0	0	0	0	0	0	0	0	0	0	0	0	0	0	2.54271	7.78621	14.7395	22.83	57.2994	26.2912	34.3603	55.828	103.521	110.821	116.226	133.018	144.647	152.474	168.228	182.346	191.778	202.782	221.258	228.393	248.363	280.529	307.443	343.455	381.634	417.377	459.492	480.601	513.69	542.739
756	0	0	0	0	0	0	0	0	0	0	0	0	0	0	0	0	0	0	0	21.0875	67.1034	189.787	262.935	398.553	421.547	479.74	563.431	775.73	766.256	750.588	728.24	698.697	661.414	672.357	681.358	688.239	692.813	694.882	714.223	794.517	858.421	921.057	984.369	1023.87	1077.18	1128.38	1151.38	1280.95	1405.03
760	0	0	0	0	0	0	0	0	0	0	0	0	0	0	0	0	0	0	0	116.291	169.39	298.926	441.872	598.333	586.486	744.749	1005.79	1149.53	1202.78	1256.6	1310.97	1365.92	1421.42	1477.49	1534.13	1591.33	1649.09	1707.43	1766.33	1825.8	1954.68	2071.41	2193.66	2321.67	2455.69	2839.14	3237.89	3252.99	3222.86
762	0	0	0	0	0	0	0	0	0	0	0	0	0	0	0	0	0	0	0	68.8932	209.503	351.936	513.999	681.048	846.588	1001.95	1203.45	1364.74	1503.02	1625.49	1754.54	1890.25	2032.66	2181.75	2337.45	2499.55	2667.77	2841.65	3020.56	3203.66	3389.79	3577.42	3764.55	3948.53	4125.84	4291.81	4440.05	4561.69	4583.39
764	0	0	0	0	0	0	0	0	0	0	0	0	0	0	0	0	0	0	0	2.54827	7.79667	15.0579	23.6531	33.2522	43.4487	53.7188	64.7853	74.2218	76.943	80.4516	83.9703	87.4926	91.0109	94.5169	98.0014	101.454	104.862	108.213	116.762	125.287	133.74	142.07	150.217	173.174	195.814	217.942	239.331	259.716	300.666
768	0	0	0	0	0	0	0	0	0	0	0	0	0	0	0	0	0	0	0	4.05605	13.9363	26.6019	42.6532	62.8059	87.9124	118.986	157.228	204.066	212.982	221.959	230.996	240.095	249.256	258.478	267.763	277.111	286.521	295.995	305.532	316.722	328.082	339.615	351.321	363.204	379.732	396.788	414.385	432.539	445.38
772	0	0	0	0	0	0	0	0	0	0	0	0	0	0	0	0	0	0	0	0	0	0	0	0	0	0	0	0	0	0	0	0	0	0	0	0	0	0	0	0	0	0	0	0	0	0	0	0	0
776	0	0	0	0	0	0	0	0	0	0	0	0	0	0	0	0	0	0	0	0.0115749	0.035365	0.0598108	0.0845855	0.155639	0.270138	0.448505	0.715397	1.09127	1.17916	1.27156	1.36853	1.47009	1.57622	1.68687	1.80191	1.92114	2.04427	2.17092	2.30054	2.43918	2.5799	2.72148	2.86232	3.0003	3.07007	3.1268	3.16631	3.18291	3.12709
780	0	0	0	0	0	0	0	0	0	0	0	0	0	0	0	0	0	0	0	0	0	0	0	0	0	0	0.00103272	0.00229494	0.0035099	0.00536014	0.00817451	0.0124507	0.0189412	0.0287832	0.0436936	0.0662633	0.100399	0.151988	0.229898	0.347476	0.368588	0.417229	0.471978	0.604722	0.738316	1.02507	1.28543	1.61108	1.96813
784	0	0	0	0	0	0	0	0	0	0	0	0	0	0	0	0	0	0	0	1.96006	5.89788	9.85913	13.8436	17.8511	21.8814	25.9343	40.6582	58.3124	55.5462	56.0961	56.5737	56.9825	57.3261	57.6076	57.8303	57.9971	58.111	58.1747	58.191	62.892	67.9231	73.3058	79.0631	85.2193	91.9179	99.0869	106.757	114.962	122.122
[truncated: 23 more rows]
[truncated: 108 more columns]

## Sheet: upper2
ISO1	y-10000	y-9000	y-8000	y-7000	y-6000	y-5000	y-4000	y-3000	y-2000	y-1000	y0	y100	y200	y300	y400	y500	y600	y700	y800	y900	y1000	y1100	y1200	y1300	y1400	y1500	y1600	y1700	y1710	y1720	y1730	y1740	y1750	y1760	y1770	y1780	y1790	y1800	y1810	y1820	y1830	y1840	y1850	y1860	y1870	y1880	y1890	y1900	y1910
[truncated: 235 more rows]
[truncated: 108 more columns]

[truncated: 3 more sheets: lower2grid, upper2grid, domestication_animals]
