# Supplementary material for: New anthropogenic land use estimates for the Holocene; HYDE 3.2
Source: Copernicus journal article supplement (doi:10.5194/essd-2016-58), 2016-12-07
Supplement: Supplementary file 15 [file Table S7.xlsx]

## Sheet: regions
Region no.	Region name	Land area (in km2)	in Mha
1	Canada	8918000	891.8
2	USA	9.0788e+06	907.88
3	Mexico	1943090	194.309
4	Rest Central America	735115	73.5115
5	Brazil	8442870	844.287
6	Rest South America	9.18457e+06	918.457
7	Northern Africa	6014386	601.439
8	Western Africa	1.13503e+07	1135.03
9	Eastern Africa	5.84941e+06	584.941
10	South Africa	1219090	121.909
11	Western Europe	3.62514e+06	362.514
12	Central Europe	1.33758e+06	133.758
13	Turkey	775569	77.5569
14	Ukraine +	824610	82.461
15	Asia-Stan	3888675	388.868
16	Russia +	1.65175e+07	1651.75
17	Middle East	5.17303e+06	517.303
18	India	3164144	316.414
19	Korea	236430	23.643
20	China +	1.08862e+07	1088.62
21	Southeastern Asia	2.57686e+06	257.686
22	Indonesia +	2415585	241.559
23	Japan	421313	42.1313
24	Oceania	8.03449e+06	803.449
25	Rest of South Asia	1.84341e+06	184.341
26	Rest Southern Africa	5.60027e+06	560.027
27	Greenland	312914	31.2914
28	Antarctica
	World (without Antartica)	1.30369e+08	13036.9

## Sheet: countries
Reg.no.	Reg. name	Country name
1	Canada	Canada
2	USA	Saint Pierre and Miquelon
2	USA	United States of America
2	USA	United States Minor Outlying Islands
3	Mexico	United Mexican States
4	Rest Central America	Anguilla
4	Rest Central America	Antigua and Barbuda
4	Rest Central America	Aruba
4	Rest Central America	Commonwealth of the Bahamas
4	Rest Central America	Barbados
4	Rest Central America	Belize
4	Rest Central America	Bermuda
4	Rest Central America	Cayman Islands
4	Rest Central America	Republic of Costa Rica
4	Rest Central America	Republic of Cuba
4	Rest Central America	Commonwealth of Dominica
4	Rest Central America	Dominican Republic
4	Rest Central America	Republic of El Salvador
4	Rest Central America	Grenada
4	Rest Central America	Guadeloupe
4	Rest Central America	Republic of Guatemala
4	Rest Central America	Republic of Haiti
4	Rest Central America	Republic of Honduras
4	Rest Central America	Jamaica
4	Rest Central America	Martinique
4	Rest Central America	Montserrat
4	Rest Central America	Netherlands Antilles
4	Rest Central America	Republic of Nicaragua
4	Rest Central America	Republic of Panama
4	Rest Central America	Puerto Rico
4	Rest Central America	Saint Kitts and Nevis
4	Rest Central America	Saint Lucia
4	Rest Central America	Saint Vincent and the Grenadines
4	Rest Central America	Republic of Trinidad and Tobago
4	Rest Central America	Turks and Caicos Islands
4	Rest Central America	British Virgin Islands
4	Rest Central America	Virgin Islands of the United States
5	Brazil	Federative Republic of Brazil
6	Rest South America	Argentine Republic
6	Rest South America	Republic of Bolivia
6	Rest South America	Bouvet Island
6	Rest South America	Republic of Chile
6	Rest South America	Republic of Colombia
6	Rest South America	Republic of Ecuador
6	Rest South America	Falklands Islands (Malvinas)
6	Rest South America	French Guiana
6	Rest South America	Republic of Guyana
6	Rest South America	Republic of Paraguay
6	Rest South America	Republic of Peru
6	Rest South America	South Georgia and the South Sandwich Islands
6	Rest South America	Republic of Suriname
6	Rest South America	Eastern Republic of Uruguay
6	Rest South America	Republic of Venezuela
7	Northern Africa	People's Democratic Republic of Algeria
7	Northern Africa	Arab Republic of Egypt
7	Northern Africa	Socialist People's Libyan Arab Jamahiriya
7	Northern Africa	Kingdom of Morocco
7	Northern Africa	Republic of Tunisia
7	Northern Africa	Western Sahara
8	Western Africa	Republic of Benin
8	Western Africa	Burkina Faso
8	Western Africa	Republic of Cameroon
8	Western Africa	Republic of Cape Verde
8	Western Africa	Central African Republic
8	Western Africa	Republic of Chad
8	Western Africa	Republic of the Congo
8	Western Africa	The Democratic Republic of the Congo
8	Western Africa	Republic of Côte d'Ivoire
8	Western Africa	Republic of Equatorial Guinea
8	Western Africa	Gabonese Republic
8	Western Africa	Republic of the Gambia
8	Western Africa	Republic of Ghana
8	Western Africa	Republic of Guinea
8	Western Africa	Republic of Guinea-Bissau
8	Western Africa	Republic of Liberia
8	Western Africa	Republic of Mali
8	Western Africa	Islamic Republic of Mauritania
8	Western Africa	Republic of the Niger
8	Western Africa	Federal Republic of Nigeria
8	Western Africa	Saint Helena
8	Western Africa	Democratic Republic of Sao Tome and Principe
8	Western Africa	Republic of Senegal
8	Western Africa	Republic of Sierra Leone
8	Western Africa	Togolese Republic
9	Eastern Africa	Republic of Burundi
9	Eastern Africa	Islamic Federal Republic of the Comoros
9	Eastern Africa	Republic of Djibouti
9	Eastern Africa	Eritrea
9	Eastern Africa	Federal Democratic Republic of Ethiopia
9	Eastern Africa	Republic of Kenya
9	Eastern Africa	Republic of Madagascar
9	Eastern Africa	Republic of Mauritius
9	Eastern Africa	Mayotte
9	Eastern Africa	Réunion
9	Eastern Africa	Rwandese Republic
9	Eastern Africa	Republic of Seychelles
9	Eastern Africa	Somali Democratic Republic
9	Eastern Africa	Republic of the Sudan
9	Eastern Africa	Republic of Uganda
26	Rest Southern Africa	Republic of Angola
26	Rest Southern Africa	Republic of Botswana
26	Rest Southern Africa	Kingdom of Lesotho
26	Rest Southern Africa	Republic of Malawi
26	Rest Southern Africa	Republic of Mozambique
26	Rest Southern Africa	Republic of Namibia
10	South Africa	Republic of South Africa
26	Rest Southern Africa	Kingdom of Swaziland
26	Rest Southern Africa	United Republic of Tanzania
26	Rest Southern Africa	Republic of Zambia
26	Rest Southern Africa	Republic of Zimbabwe
11	Western Europe	Principality of Andorra
11	Western Europe	Republic of Austria
11	Western Europe	Kingdom of Belgium
11	Western Europe	Kingdom of Denmark
11	Western Europe	Faroe Islands
11	Western Europe	Republic of Finland
11	Western Europe	French Republic
11	Western Europe	Federal Republic of Germany
11	Western Europe	Gibraltar
11	Western Europe	Hellenic Republic
11	Western Europe	Holy See (Vatican City State)
11	Western Europe	Republic of Iceland
11	Western Europe	Ireland
11	Western Europe	Italian Republic
11	Western Europe	Principality of Liechtenstein
11	Western Europe	Grand Duchy of Luxembourg
11	Western Europe	Principality of Monaco
11	Western Europe	Kingdom of the Netherlands
11	Western Europe	Kingdom of Norway
11	Western Europe	Portuguese Republic
11	Western Europe	Republic of San Marino
11	Western Europe	Kingdom of Spain
11	Western Europe	Svalbard and Jan Mayen
11	Western Europe	Kingdom of Sweden
11	Western Europe	Swiss Confederation
11	Western Europe	United Kingdom of Great Britain and Northern Ireland
12	Central Europe	Republic of Albania
12	Central Europe	Republic of Bosnia and Herzegovina
12	Central Europe	Republic of Bulgaria
12	Central Europe	Republic of Croatia
12	Central Europe	Republic of Cyprus
12	Central Europe	Czech Republic
12	Central Europe	Republic of Estonia
12	Central Europe	Republic of Hungary
12	Central Europe	Republic of Latvia
12	Central Europe	Republic of Lithuania
12	Central Europe	The former Yugoslav Republic of Macedonia
12	Central Europe	Republic of Malta
12	Central Europe	Republic of Poland
12	Central Europe	Romania
12	Central Europe	Slovak Republic
12	Central Europe	Republic of Slovenia
12	Central Europe	Federal Republic of Yugoslavia
13	Turkey	Republic of Turkey
14	Ukraine +	Republic of Belarus
14	Ukraine +	Republic of Moldova
14	Ukraine +	Ukraine
15	Asia-Stan	Republic of Kazakstan
15	Asia-Stan	Kyrgyz Republic
15	Asia-Stan	Republic of Tajikistan
15	Asia-Stan	Turkmenistan
15	Asia-Stan	Republic of Uzbekistan
16	Russia +	Republic of Armenia
16	Russia +	Azerbaijani Republic
16	Russia +	Georgia
16	Russia +	Russian Federation
17	Middle East	State of Bahrain
17	Middle East	Islamic Republic of Iran
17	Middle East	Republic of Iraq
17	Middle East	State of Israel
17	Middle East	Hashemite Kingdom of Jordan
17	Middle East	State of Kuwait
17	Middle East	Lebanese Republic
17	Middle East	Sultanate of Oman
17	Middle East	State of Qatar
17	Middle East	Kingdom of Saudi Arabia
17	Middle East	Syrian Arab Republic
17	Middle East	United Arab Emirates
17	Middle East	Republic of Yemen
25	Rest of South Asia	Islamic State of Afghanistan
25	Rest of South Asia	People's Republic of Bangladesh
25	Rest of South Asia	Kingdom of Bhutan
25	Rest of South Asia	British Indian Ocean Territory
18	India	Republic of India
25	Rest of South Asia	Republic of Maldives
25	Rest of South Asia	Kingdom of Nepal
25	Rest of South Asia	Islamic Republic of Pakistan
25	Rest of South Asia	Democratic Socialist Republic of Sri Lanka
19	Korea	Democratic People's Republic of Korea
19	Korea	Republic of Korea
20	China +	People's Republic of China
20	China +	Hong Kong
20	China +	Macau
20	China +	Mongolia
20	China +	Taiwan, Province of China
21	Southeastern Asia	Brunei Darussalam
21	Southeastern Asia	Kingdom of Cambodia
21	Southeastern Asia	Lao People's Democratic Republic
21	Southeastern Asia	Malaysia
21	Southeastern Asia	Union of Myanmar
21	Southeastern Asia	Republic of the Philippines
21	Southeastern Asia	Republic of Singapore
21	Southeastern Asia	Kingdom of Thailand
21	Southeastern Asia	Socialist Republic of Viet Nam
22	Indonesia +	Republic of Indonesia
22	Indonesia +	East Timor
22	Indonesia +	Papua New Guinea
23	Japan	Japan
24	Oceania	American Samoa
24	Oceania	Australia
24	Oceania	Christmas Island
24	Oceania	Cocos (Keeling) Islands
24	Oceania	Cook Islands
24	Oceania	Republic of Fiji
24	Oceania	French Polynesia
24	Oceania	French Southern Territories
24	Oceania	Guam
24	Oceania	Heard Island and McDonald Islands
24	Oceania	Kiribati
24	Oceania	Republic of the Marshall Islands
24	Oceania	Federated States of Micronesia
24	Oceania	Republic of Nauru
24	Oceania	New Caledonia
24	Oceania	New Zealand
24	Oceania	Niue
24	Oceania	Norfolk Island
24	Oceania	Commonwealth of the Northern Mariana Islands
24	Oceania	Republic of Palau
24	Oceania	Pitcairn
24	Oceania	Independent State of Western Samoa
24	Oceania	Solomon Islands
24	Oceania	Tokelau
24	Oceania	Kingdom of Tonga
24	Oceania	Tuvalu
24	Oceania	Republic of Vanuatu
24	Oceania	Wallis and Futuna
27	Greenland	Greenland
28	Antarctica	Antarctica

## Sheet: summary
Population in millions, land use in Mha
	-10000	-9000	-8000	-7000	-6000	-5000	-4000	-3000	-2000	-1000	0	100	200	300	400	500	600	700	800	900	1000	1100	1200	1300	1400	1500	1600	1700	1710	1720	1730	1740	1750	1760	1770	1780	1790	1800	1810	1820	1830	1840	1850	1860	1870	1880	1890	1900	1910
Population	4.43227	5.61697	7.24288	9.57788	13.2018	19.0757	28.7746	44.4871	72.5858	110.419	232.123	236.904	240.611	227.55	241.539	253.238	271.479	278.186	285.715	310.969	323.41	397.927	444.753	456.392	442.486	503.248	515.762	591.735	613.206	642.738	664.757	695.373	745.694	779.923	818.86	891.074	931.608	943.465	1016.69	1052.82	1134.8	1194.37	1270.59	1327.61	1326.91	1405.15	1522.73	1642	1764.98
Cropland	0	0	0.0106691	1.80518	3.92607	10.366	27.969	48.2809	72.4498	116.476	196.912	196.654	194.168	180.933	177.171	171.873	170.787	169.317	169.271	180.717	184.243	219.621	249.202	253.897	226.538	260.65	272.603	294.473	306.624	319.306	330.922	342.323	357.063	369.335	382.339	397.165	412.991	431.216	453.943	477.296	505.313	543.161	580.494	621.905	653.012	719.458	782.733	843.609	934.617
Grazing land	0	0	0	0.378155	12.118	31.7686	48.1171	72.8283	113.466	152.04	243.576	207.88	215.779	216.028	230.816	248.804	271.281	289.492	314.317	349.492	368.24	449.68	500.599	511.575	486.309	517.947	583.556	667.889	670.749	690.518	706.107	726.263	756.422	784.189	813.909	862.128	895.631	916.645	975.968	1013.62	1076.44	1136.72	1197.34	1256.43	1257.77	1365.66	1476	1663.08	1824.41
Irrigated land	0	0	0	0.00144893	0.0391012	0.181585	1.02228	1.28105	1.5577	2.06105	3.40998	3.50884	3.64608	3.69812	3.73082	3.75863	3.7651	3.93639	4.08177	4.36083	4.46906	4.26165	4.09104	4.19672	3.95032	4.30126	4.38731	4.47339	4.96909	5.45098	5.93343	6.41618	6.89959	7.38358	7.86801	8.35285	8.8383	9.32429	13.1531	16.9415	20.728	24.5136	28.3038	31.9693	35.7865	39.6109	43.6191	47.5804	59.088
Rice	0	0	0.000619526	0.00922103	0.0184039	0.0507777	0.0997626	0.198767	0.416994	0.755275	2.29676	2.25248	2.17718	1.87165	2.13277	2.41155	2.79805	2.86699	2.88521	3.18847	3.22547	4.41742	4.86882	4.62917	4.80485	5.63379	6.45624	7.8523	8.14353	8.49796	8.70901	9.07412	9.79591	10.2114	10.7083	11.7998	12.3008	12.2638	13.8333	14.7795	16.6945	18.3728	20.8059	23.239	25.2993	29.0758	36.0482	39.626	41.259
rf_norice + rf_rice + ir_norice + ir_rice	0	0	0.0106691	1.80518	3.92607	10.366	27.969	48.2809	72.4498	116.476	196.912	196.655	194.17	180.935	177.174	171.878	170.793	169.325	169.281	180.729	184.255	219.633	249.213	253.908	226.551	260.666	272.625	294.505	306.653	319.338	330.959	342.362	357.106	369.379	382.385	397.213	413.04	431.265	454.002	477.371	505.389	543.211	580.547	621.976	653.101	719.548	782.833	843.734	934.851
total rainfed + total irri	0	0	0.0106691	1.80518	3.92607	10.366	27.969	48.2809	72.4498	116.476	196.912	196.654	194.168	180.933	177.171	171.873	170.787	169.317	169.272	180.717	184.243	219.621	249.202	253.897	226.538	260.65	272.604	294.473	306.624	319.306	330.922	342.323	357.063	369.335	382.339	397.165	412.991	431.216	453.943	477.296	505.314	543.161	580.494	621.905	653.012	719.458	782.732	843.609	934.618
per capita
crop/cap	0	0	0.00147304	0.188473	0.297388	0.543412	0.972003	1.08528	0.998127	1.05486	0.848308	0.830098	0.806978	0.795135	0.733508	0.678704	0.629099	0.608647	0.592449	0.581142	0.569688	0.551913	0.560315	0.556314	0.511966	0.517935	0.528545	0.497645	0.500034	0.49679	0.497808	0.492286	0.478833	0.473553	0.466917	0.445715	0.443309	0.457055	0.446492	0.453351	0.445288	0.454769	0.456869	0.468439	0.492131	0.512016	0.514031	0.513768	0.529535
grazing/cap	0	0	0	0.0394821	0.917907	1.66539	1.6722	1.63707	1.5632	1.37694	1.04934	0.877484	0.896795	0.949366	0.955606	0.982492	0.999272	1.04064	1.10011	1.12388	1.13862	1.13006	1.12557	1.12091	1.09904	1.02921	1.13144	1.1287	1.09384	1.07434	1.0622	1.04442	1.01439	1.00547	0.993954	0.967515	0.961382	0.971573	0.959948	0.962767	0.948574	0.951734	0.942348	0.946389	0.947893	0.971897	0.969307	1.01283	1.03367
irri/cap	0	0	0	0.000151278	0.0029618	0.00951919	0.0355272	0.0287959	0.0214601	0.0186657	0.0146904	0.0148112	0.0151534	0.0162519	0.015446	0.0148423	0.0138689	0.0141502	0.0142862	0.0140234	0.0138186	0.0107096	0.00919844	0.00919543	0.00892756	0.00854699	0.00850645	0.0075598	0.00810347	0.00848087	0.00892571	0.00922696	0.00925257	0.00946706	0.00960849	0.00937391	0.00948714	0.00988303	0.0129372	0.0160915	0.0182658	0.0205244	0.0222761	0.0240804	0.0269699	0.0281899	0.0286453	0.028977	0.0334781
rice/cap	0	0	8.55359e-05	0.000962743	0.00139404	0.0026619	0.00346703	0.00446797	0.00574485	0.00684007	0.00989457	0.00950796	0.00904854	0.00822524	0.00882989	0.00952288	0.0103067	0.010306	0.0100982	0.0102533	0.00997332	0.0111011	0.0109472	0.010143	0.0108588	0.0111949	0.0125179	0.01327	0.0132803	0.0132215	0.013101	0.0130493	0.0131366	0.0130928	0.0130771	0.0132422	0.0132039	0.0129986	0.0136063	0.0140381	0.0147114	0.0153829	0.016375	0.0175044	0.0190664	0.0206924	0.0236733	0.0241327	0.0233765
	-10000	-9000	-8000	-7000	-6000	-5000	-4000	-3000	-2000	-1000	0	100	200	300	400	500	600	700	800	900	1000	1100	1200	1300	1400	1500	1600	1700	1710	1720	1730	1740	1750	1760	1770	1780	1790	1800	1810	1820	1830	1840	1850	1860	1870	1880	1890	1900	1910
Cropland, Baseline	0	0	0.0106691	1.80518	3.92607	10.366	27.969	48.2809	72.4498	116.476	196.912	196.654	194.168	180.933	177.171	171.873	170.787	169.317	169.271	180.717	184.243	219.621	249.202	253.897	226.538	260.65	272.603	294.473	306.624	319.306	330.922	342.323	357.063	369.335	382.339	397.165	412.991	431.216	453.943	477.296	505.313	543.161	580.494	621.905	653.012	719.458	782.733	843.609	934.617
Cropland, Lower	0	0	0.000533452	0.134977	0.392356	1.29553	4.19512	8.44914	14.4907	26.2093	49.4546	55.1632	60.1063	61.2478	65.1455	68.25	72.8391	77.1934	82.154	93.0274	100.266	125.962	150.261	160.565	149.916	180.158	196.447	220.87	233.049	245.879	258.135	270.454	285.677	299.196	313.559	329.696	346.967	366.597	390.507	415.393	444.848	483.592	522.616	566.078	600.923	669.229	735.871	801.474	891.658
Cropland, upper	0	0	0.0208046	3.47498	7.45956	19.4362	51.7396	88.107	130.382	206.68	343.622	337.609	327.71	299.969	288.915	275.403	268.69	261.398	256.352	268.375	268.197	313.252	348.107	347.025	303.134	341.115	348.705	367.892	380.004	392.514	403.472	413.941	428.196	439.216	450.859	464.381	478.76	495.593	517.191	539.046	565.64	602.627	638.239	677.623	705.049	769.643	829.543	885.7	977.574
	-10000	-9000	-8000	-7000	-6000	-5000	-4000	-3000	-2000	-1000	0	100	200	300	400	500	600	700	800	900	1000	1100	1200	1300	1400	1500	1600	1700	1710	1720	1730	1740	1750	1760	1770	1780	1790	1800	1810	1820	1830	1840	1850	1860	1870	1880	1890	1900	1910
Grazing land, Baseline	0	0	0	0.378155	12.118	31.7686	48.1171	72.8283	113.466	152.04	243.576	207.88	215.779	216.028	230.816	248.804	271.281	289.492	314.317	349.492	368.24	449.68	500.599	511.575	486.309	517.947	583.556	667.889	670.749	690.518	706.107	726.263	756.422	784.189	813.909	862.128	895.631	916.645	975.968	1013.62	1076.44	1136.72	1197.34	1256.43	1257.77	1365.66	1476	1663.08	1824.41
Grazing land, Lower	0	0	0	0.0283617	1.21181	3.97108	7.21756	12.7451	22.6928	34.2096	60.8928	58.0876	66.6367	73.099	84.8619	98.7911	115.691	131.979	152.544	179.892	200.371	257.911	301.908	323.742	321.831	358.003	420.514	501.099	510.025	532.007	551.088	574.069	605.419	635.542	667.835	716.028	752.765	779.556	839.73	882.412	948.408	1012.74	1078.43	1143.62	1157.36	1270.48	1387.94	1580.35	1740.94
Grazing land, Upper	0	0	0	0.72794	23.0245	59.5649	89.0143	132.909	204.237	269.738	425.957	357.341	364.517	355.353	376.387	398.535	426.715	447.011	476.108	519.081	536.087	640.819	691.181	678.316	650.601	677.186	744.408	826.247	825.103	844.72	858.843	878.177	907.152	932.656	959.896	1008.15	1038.42	1053.64	1112.13	1144.05	1204.38	1260.66	1316.07	1368.81	1357.67	1460.63	1564.04	1745.8	1907.66
	-10000	-9000	-8000	-7000	-6000	-5000	-4000	-3000	-2000	-1000	0	100	200	300	400	500	600	700	800	900	1000	1100	1200	1300	1400	1500	1600	1700	1710	1720	1730	1740	1750	1760	1770	1780	1790	1800	1810	1820	1830	1840	1850	1860	1870	1880	1890	1900	1910
Irrigated land, Baseline	0	0	0	0.00144893	0.0391012	0.181585	1.02228	1.28105	1.5577	2.06105	3.40998	3.50884	3.64608	3.69812	3.73082	3.75863	3.7651	3.93639	4.08177	4.36083	4.46906	4.26165	4.09104	4.19672	3.95032	4.30126	4.38731	4.47339	4.96909	5.45098	5.93343	6.41618	6.89959	7.38358	7.86801	8.35285	8.8383	9.32429	13.1531	16.9415	20.728	24.5136	28.3038	31.9693	35.7865	39.6109	43.6191	47.5804	59.088
Irrigated land, Lower	0	0	0	0.00010867	0.00391012	0.0226982	0.153344	0.224185	0.311544	0.463741	0.852506	0.980663	1.126	1.25085	1.37165	1.49242	1.60573	1.79464	1.98087	2.2448	2.43184	2.44433	2.46667	2.65381	2.61418	2.9729	3.16146	3.35521	3.77608	4.19732	4.62801	5.06885	5.51973	5.9807	6.45175	6.93287	7.42416	7.92564	11.3117	14.7391	18.2414	21.8185	25.4736	29.0914	32.9239	36.8385	41.0016	45.2015	56.3699
Irrigated land, Upper	0	0	0	0.00278919	0.0742923	0.340468	1.89119	2.33786	2.80384	3.65837	5.96743	6.03871	6.16489	6.14527	6.08995	6.02492	5.92457	6.07795	6.18187	6.47754	6.50673	6.07946	5.71543	5.73965	5.28641	5.62955	5.61318	5.59224	6.16169	6.70489	7.23884	7.76365	8.27964	8.78648	9.28426	9.77289	10.2524	10.7229	14.9946	19.1439	23.2149	27.212	31.1354	34.8465	38.648	42.3837	46.2363	49.9593	61.8059
	-10000	-9000	-8000	-7000	-6000	-5000	-4000	-3000	-2000	-1000	0	100	200	300	400	500	600	700	800	900	1000	1100	1200	1300	1400	1500	1600	1700	1710	1720	1730	1740	1750	1760	1770	1780	1790	1800	1810	1820	1830	1840	1850	1860	1870	1880	1890	1900	1910
Rice, Baseline	0	0	0.000619526	0.00922103	0.0184039	0.0507777	0.0997626	0.198767	0.416994	0.755275	2.29676	2.25248	2.17718	1.87165	2.13277	2.41155	2.79805	2.86699	2.88521	3.18847	3.22547	4.41742	4.86882	4.62917	4.80485	5.63379	6.45624	7.8523	8.14353	8.49796	8.70901	9.07412	9.79591	10.2114	10.7083	11.7998	12.3008	12.2638	13.8333	14.7795	16.6945	18.3728	20.8059	23.239	25.2993	29.0758	36.0482	39.626	41.259
Rice, Lower	0	0	3.09763e-05	0.000678203	0.00184039	0.00633538	0.0149458	0.0347774	0.083383	0.169895	0.574147	0.629332	0.672283	0.633007	0.784074	0.957498	1.19326	1.30699	1.40016	1.64111	1.75503	2.53351	2.9356	2.92727	3.17968	3.89393	4.65229	5.88923	6.18908	6.54342	6.79303	7.16855	7.83673	8.27119	8.7808	9.79384	10.3327	10.4242	11.8967	12.8582	14.6911	16.3518	18.7253	21.1475	23.2754	27.0405	33.8853	37.6447	39.3611
Rice, Upper	0	0	0.00120808	0.0177505	0.0349673	0.0952081	0.184561	0.362791	0.750651	1.34064	4.01942	3.87567	3.68201	3.11025	3.48148	3.86557	4.40282	4.42698	4.37027	4.73583	4.69591	6.30134	6.80203	6.33108	6.43002	7.37364	8.26019	9.81537	10.098	10.4525	10.625	10.9797	11.7551	12.1515	12.6358	13.8058	14.269	14.1033	15.77	16.7009	18.6978	20.3938	22.8865	25.3305	27.3233	31.1112	38.2111	41.6073	43.1568
in Mha		-10000	-9000	-8000	-7000	-6000	-5000	-4000	-3000	-2000	-1000	0	100	200	300	400	500	600	700	800	900	1000	1100	1200	1300	1400	1500	1600	1700	1710	1720	1730	1740	1750	1760	1770	1780	1790	1800	1810	1820	1830	1840	1850	1860	1870	1880	1890	1900
North America	Rainfed other crops	0	0	0	0	0	0	0	0	0.0285859	0.212738	0.424982	0.44522	0.466419	0.488632	0.511899	0.536275	0.561811	0.588564	0.612447	0.69136	0.770688	0.835904	0.930937	1.01448	1.1344	1.24708	0.589623	0.767993	1.06164	1.38027	1.75483	2.15659	2.62323	3.17103	3.83783	4.7267	5.82657	8.28278	11.1625	15.2291	21.4527	30.6953	42.2416	60.7685	69.9853	104.415	130.576	149.618
North America	Irrigated other crops	0	0	0	0	0	0	0	0	0	0	0	0	0	0	0	0	0	0	0.0041434	0.00467726	0.00521395	0.00565514	0.00629808	0.00686328	0.00767456	0.00843669	0.00398899	0.005057	0.00621987	0.00738274	0.00854561	0.0097085	0.0108714	0.0120342	0.0131971	0.01436	0.0155228	0.0166644	0.333321	0.650076	0.966606	1.28277	1.59795	1.9104	2.21724	2.50717	2.75865	3.03834
North America	Rainfed Rice	0	0	0	0	0	0	0	0	0	0	0	0	0	0	0	0	0	0	0	0	0	0	0	0	0	0	0	0	0	0	0	0	0	0	0	0	0	0	0	0	0	0	0	0	0	0	0	0
North America	Irrigated Rice	0	0	0	0	0	0	0	0	0	0	0	0	0	0	0	0	0	0	0	0	0	0	0	0	0	0	0	0	0	0	0	0	0	0	0	0	0	2.1277e-05	5.51032e-05	0.000142869	0.000373089	0.00097137	0.00256564	0.00687784	0.0168071	0.0436379	0.108924	0.146
North America	Rangeland	0	0	0	0	0	0	0	0	0	0	0	0	0	0	0	0	0	0	0	0	0	0	0	0	0	0	1.49691	4.16178	4.90099	5.70767	6.58628	7.8396	8.91986	11.3911	12.8197	14.3448	16.0057	17.8968	20.0224	22.4354	25.153	28.6235	33.1304	43.5837	39.3294	69.4129	76.015	127.47
North America	Pasture	0	0	0	0	0	0	0	0	0	0	0	0	0	0	0	0	0	0	0	0	0	0	0	0	0	0	0	0.00400521	0.00502985	0.00764176	0.0127584	0.0237286	0.0400856	0.0651764	0.0987247	0.136661	0.181197	0.283184	0.439346	0.689346	1.14413	1.75531	2.96719	5.25254	5.54071	12.4893	16.0909	30.4881
Latin America	Rainfed other crops	0	0	0	0	0.0277573	0.318058	1.09959	3.78177	5.44875	6.26045	7.14554	7.57875	8.0378	8.52419	9.03976	9.58621	10.1654	10.7775	11.4266	12.8777	14.3276	15.8626	17.3982	18.9362	20.4717	25.2431	8.99231	9.12394	9.6792	10.2601	10.8682	11.5059	12.1755	12.8798	13.6219	14.4128	15.2477	16.1311	15.6295	15.4671	16.9629	18.2981	19.7824	21.1434	22.138	23.9128	27.6168	30.6616
Latin America	Irrigated other crops	0	0	0	0	0	0	0	0	0	0.03489	0.114679	0.123405	0.131165	0.13945	0.148274	0.157668	0.167672	0.180281	0.193269	0.220747	0.24685	0.273056	0.29917	0.326089	0.352596	0.381976	0.100317	0.121656	0.141469	0.161359	0.181204	0.201056	0.22088	0.24069	0.260469	0.280159	0.299686	0.318911	0.501865	0.685333	0.868587	1.05171	1.23409	1.4168	1.59847	1.77895	1.95129	2.11508
Latin America	Rainfed Rice	0	0	0	0	0	0	0	0	0	0	0	0	0	0	0	0	0	0	0	0	0	0	0	0	0	0	0.00101555	0.00559492	0.0059113	0.00624267	0.00659525	0.00697916	0.00742258	0.00799439	0.00880204	0.0101285	0.0123974	0.0166561	0.0250708	0.027712	0.0312408	0.0339988	0.037741	0.0457278	0.0548801	0.0725314	0.122881	0.216399
Latin America	Irrigated Rice	0	0	0	0	0	0	0	0	0	0	0	0	0	0	0	0	0	0	0	0	0	0	0	0	0	0	0.00316536	0.0127085	0.0137775	0.0148465	0.0159155	0.0169845	0.0180806	0.0191924	0.0203334	0.0215637	0.0229566	0.024653	0.0270046	0.0288388	0.0308407	0.0329882	0.0354585	0.0385725	0.0422272	0.0470296	0.0600204	0.0749446
Latin America	Rangeland	0	0	0	0	0	0	0	0	0	0	0	0	0	0	0	0	0	0	0	0	0	1.33744e-05	2.57357e-05	4.92717e-05	0	0.0463467	15.7085	27.6805	28.9166	30.1665	31.423	32.6746	33.9487	35.2259	36.5354	37.8561	39.2595	40.8724	43.3152	48.1659	53.7951	58.4866	64.2459	72.8259	79.5687	87.9259	108.33	129.4
Latin America	Pasture	0	0	0	0	0	0	0	0	0	0	0	0	0	0	0	0	0	0	0	0	0	0	0	0	0	0.0135655	0.509037	1.76968	1.99975	2.22576	2.45734	2.71203	2.96878	3.25179	3.53968	3.86652	4.16244	4.48758	4.76865	5.26265	6.44627	7.49151	8.89364	10.4962	11.2916	13.2971	18.9269	23.3479
Europe	Rainfed other crops	0	0	0	0.0101424	0.195586	0.367349	1.01773	3.26434	7.23444	14.3621	33.3247	35.2115	35.1914	32.5779	29.7477	25.1407	21.1952	23.0419	25.7869	29.9811	33.7244	41.7076	57.3788	72.3003	49.1084	61.162	71.3608	76.0168	78.7634	80.718	82.7444	84.7953	89.0971	90.9774	92.8286	94.7966	96.6222	99.0233	101.073	105.053	109.041	114.572	120.679	123.92	128.784	133.94	138.541	144.173
Europe	Irrigated other crops	0	0	0	0	0	0	0	0	0	0	0.0374434	0.0447656	0.107647	0.0985239	0.0884216	0.0653391	0.0468533	0.055623	0.0638309	0.0689039	0.0570797	0.0625854	0.0824766	0.0839826	0.0695543	0.0852796	0.0953018	0.104146	0.116518	0.130371	0.14452	0.158846	0.173175	0.187529	0.201746	0.216022	0.230236	0.244365	0.494329	0.745281	0.993509	1.24264	1.48936	1.73565	1.98558	2.23074	2.35726	2.64311
Europe	Rainfed Rice	0	0	0	0	0	0	0	0	0	0	0	0	0	0	0	0	0	0	0	0	0.00298901	0.00401303	0.00464579	0.00606795	0.00456634	0.00603268	0.00750065	0.00767994	0.00740593	0.00707248	0.00694427	0.00728102	0.00762786	0.00798551	0.00835678	0.00886833	0.00939317	0.00993226	0.00986379	0.00981167	0.0105418	0.0111493	0.0113948	0.011605	0.0119345	0.012519	0.0132248	0.0143838
Europe	Irrigated Rice	0	0	0	0	0	0	0	0	0	0	0	0	0	0	0	0	0	0	0	0	0.021633	0.0330817	0.0422245	0.0603462	0.0408378	0.0483171	0.0659641	0.0689676	0.0736934	0.0769257	0.0800206	0.0827212	0.085485	0.0882967	0.091174	0.0939933	0.0968847	0.0998509	0.104535	0.109131	0.11645	0.122669	0.131689	0.140945	0.146573	0.156323	0.285051	0.261396
Europe	Rangeland	0	0	0	0	0	0.443247	0.840983	1.69234	3.61463	6.15558	7.85862	7.64911	7.33296	7.35386	7.39856	7.3225	6.93588	9.58261	13.3936	16.6754	16.2574	18.2836	14.528	11.378	12.5054	8.91491	8.12322	7.64269	7.61361	7.59331	7.56374	7.56212	7.55509	7.76596	8.02965	8.20151	8.31844	8.34432	8.40487	8.81009	9.23607	9.6672	10.0997	10.6392	11.1177	11.6632	12.1273	12.6463
Europe	Pasture	0	0	0	0	0	0.00187357	0.00329829	0.0115259	0.128954	1.25829	10.5223	11.3295	12.0908	10.7894	9.51843	7.40039	5.59257	10.5934	18.4621	30.1002	38.7499	62.9126	78.7336	86.3645	65.0079	69.0692	74.5525	84.1856	83.7126	81.3319	78.4949	75.1255	71.2559	71.4053	71.359	71.5564	71.8829	71.9001	73.3704	76.1386	79.1851	82.0135	84.1868	86.1151	87.3715	89.4186	89.995	90.4032
USSR	Rainfed other crops	0	0	0	0	0.0151502	0.194822	0.515103	1.40102	1.57085	2.87006	3.15694	3.45675	3.77217	4.09256	4.41839	4.52902	4.64708	4.99252	5.34319	5.66107	5.97532	8.42723	11.9032	12.4743	12.2046	15.3757	18.8476	21.9966	23.8249	26.3032	28.8556	31.4916	34.2759	36.8034	39.3944	42.0582	44.8071	47.6484	50.3157	53.4777	57.0109	65.3017	70.2043	79.6627	86.8213	99.4627	113.988	129.517
USSR	Irrigated other crops	0	0	0	0	0	0	0	0	0	0	0.0544374	0.0695007	0.0742315	0.0792412	0.0845362	0.0901164	0.0959491	0.101968	0.108914	0.112011	0.114242	0.13138	0.14869	0.165695	0.162082	0.179909	0.206889	0.23325	0.273044	0.313489	0.353893	0.394254	0.434582	0.474853	0.515082	0.555265	0.5954	0.635487	0.8881	1.14184	1.39565	1.64692	1.90291	2.15673	2.41014	2.66223	2.91369	3.16494
USSR	Rainfed Rice	0	0	0	0	0	0	0	0	0	1.72465e-05	0	1.17053e-05	1.95168e-05	3.22267e-05	5.28073e-05	7.94509e-05	0.000119896	0.000196812	0.000323909	0.000520568	0.000832908	0.000722346	0.00108352	0.00112136	0.00112136	0.00144469	0.00180587	0.00258797	0.00214022	0.0022338	0.00232738	0.00242095	0.00251453	0.00260811	0.00270168	0.00279526	0.00288884	0.00298241	0.000846441	0	0	0	0	0	0	0	0	0
USSR	Irrigated Rice	0	0	0	0	0	0	0	0	0	0	4.67777e-05	7.51784e-05	0.000120822	0.000204341	0.000338793	0.000544489	0.000875071	0.00141888	0.00294741	0.00457786	0.0071019	0.00823456	0.0092171	0.0102781	0.0115711	0.0136695	0.0173884	0.021654	0.0235786	0.0248518	0.0261661	0.0275229	0.0289231	0.030368	0.0318584	0.0333952	0.0349788	0.0366095	0.0405167	0.0432955	0.0453319	0.0486015	0.0510655	0.0544731	0.0572491	0.0619413	0.066833	0.0723227
USSR	Rangeland	0	0	0	0	5.72404	10.8219	12.6227	14.7229	17.4434	20.5681	23.9802	26.0391	27.8653	29.7141	31.586	32.7341	33.9741	36.0159	38.1692	39.1172	39.9398	46.3287	54.6778	56.8447	57.266	64.0037	71.2879	74.2682	76.7666	79.7081	82.3152	84.664	86.9403	89.0905	91.1946	93.1888	95.1125	96.9718	98.7755	100.93	103.241	108.633	111.487	116.117	119.035	130.594	140.484	155.886
USSR	Pasture	0	0	0	0	0.00367593	0.00608317	0.00934487	0.01374	0.0221903	0.0360772	0.0565319	0.070117	0.0918536	0.121804	0.162058	0.202861	0.235917	0.301066	0.367609	0.409514	0.452915	0.841446	1.38675	1.6512	1.35411	2.33183	3.79883	5.51715	6.04065	7.43869	9.10127	10.9498	12.7909	14.6725	16.5091	18.3553	20.1607	21.9099	23.5795	25.5737	27.6094	34.1771	37.05	43.5448	46.8508	54.274	62.583	69.8073
M.East, N. Africa, Turkey	Rainfed other crops	0	0	0.00997536	0.138259	0.657629	3.64041	13.4666	16.631	18.1021	22.7071	27.7689	29.9276	32.3944	32.6396	29.5344	26.7323	24.2548	24.4449	24.9073	27.1659	26.6187	22.2117	23.133	22.848	19.283	19.7434	24.3391	22.9957	23.2304	23.5069	23.7825	24.0568	24.3298	24.6009	24.8701	25.137	25.4012	25.6624	28.3947	28.6447	29.9568	31.1893	32.412	33.6256	34.9045	36.9306	38.9351	40.474
M.East, N. Africa, Turkey	Irrigated other crops	0	0	0	0.00144893	0.0391012	0.181585	0.842305	0.972104	1.0259	1.10442	1.25171	1.32401	1.39947	1.45957	1.50213	1.5464	1.56563	1.67925	1.76866	1.82159	1.85403	1.58283	1.35019	1.39487	1.09022	0.973044	1.08393	0.843643	0.847981	0.84034	0.833158	0.826542	0.820393	0.814801	0.809702	0.805115	0.801044	0.797485	0.961943	1.08962	1.21456	1.35031	1.4872	1.51201	1.67986	1.83955	2.16981	2.47178
M.East, N. Africa, Turkey	Rainfed Rice	0	0	0	0	0	0	0	0	0	0	0	0	0	0	0	0	0	0	0	0	0	0	0	0	0	0.0105213	0.0391969	0.0796334	0.077965	0.0758821	0.0737675	0.0716172	0.0694264	0.0671901	0.0649026	0.0625578	0.0601486	0.0576674	0.038044	0.0183303	0.0028968	0	0	0	0	0	0	0
M.East, N. Africa, Turkey	Irrigated Rice	0	0	0	0	0	0	0	0	0.00547327	0.0109508	0.0327334	0.0353091	0.0379515	0.0357858	0.0337552	0.0302789	0.0270829	0.0323521	0.0389667	0.0478012	0.058574	0.0562909	0.0613498	0.0729577	0.0740687	0.0788999	0.0980454	0.0909092	0.0955217	0.0982522	0.100986	0.103725	0.106467	0.109213	0.111963	0.114717	0.117475	0.120237	0.144305	0.168387	0.193147	0.205014	0.213677	0.213865	0.224688	0.251361	0.290673	0.281294
M.East, N. Africa, Turkey	Rangeland	0	0	0	0.3686	0.879681	2.19603	4.21987	6.48867	9.95097	14.8199	24.3975	26.4182	28.9751	31.2992	30.7143	32.2872	37.486	36.8271	36.4587	38.7754	37.3371	35.1826	35.1188	33.1348	31.851	34.0833	42.0709	38.7026	39.6946	40.9452	42.3212	43.85	45.5755	47.5384	49.7967	52.4328	55.5381	59.252	63.7322	69.4086	79.1823	90.5208	104.047	108.483	113.025	120.39	128.186	135.446
M.East, N. Africa, Turkey	Pasture	0	0	0	0.00955443	0.0212144	0.0319512	0.0511022	0.0987402	0.425169	0.966169	1.65805	1.82344	1.97342	1.84892	1.8063	1.70746	1.56816	1.60323	1.68521	1.86253	1.97165	1.58185	1.78159	1.86034	1.48806	1.55488	2.2735	2.26268	2.31403	2.37058	2.42962	2.493	2.55698	2.63125	2.71142	2.79214	2.87933	2.95333	3.03214	3.10596	3.36289	3.61916	3.89685	4.15206	4.40538	4.76935	5.12927	5.44122
Tropical Africa	Rainfed other crops	0	0	0	0	0	0.0638967	0.279118	1.22647	1.84482	2.80368	4.29396	4.82392	5.45897	6.22619	7.1599	8.30268	9.71566	11.4711	13.6721	15.4709	17.3129	19.2444	21.2395	23.8533	26.6781	28.8185	33.0874	37.9772	37.8339	38.0703	38.3305	38.6159	38.9275	39.2678	39.6389	40.044	40.4864	40.97	42.2025	42.7724	43.9711	45.2958	46.8074	48.4916	50.4032	53.1441	55.6385	58.936
Tropical Africa	Irrigated other crops	0	0	0	0	0	0	0	0	0	0	0.0121731	0.012613	0.0130686	0.0135404	0.0140289	0.0163365	0.017317	0.0203028	0.0219977	0.0241839	0.0282554	0.0323395	0.0353486	0.0418277	0.0461105	0.0509921	0.0588849	0.0745819	0.0816213	0.0912794	0.100918	0.110538	0.120053	0.129676	0.139244	0.148748	0.158204	0.167673	0.227427	0.283723	0.339757	0.395626	0.451278	0.506812	0.562051	0.616895	0.671593	0.727342
Tropical Africa	Rainfed Rice	0	0	0	0	0	0	0	0	0.000295497	0.000447668	0.000640169	0.000872648	0.00123446	0.001759	0.00263014	0.00409701	0.00674789	0.0115394	0.0204504	0.0349549	0.0593202	0.0803078	0.109644	0.15164	0.21789	0.326513	0.519449	0.835131	0.834448	0.836507	0.838787	0.841304	0.844546	0.847653	0.85113	0.855035	0.859434	0.864444	0.871682	0.878931	0.887205	0.898169	0.910896	0.925975	0.945277	0.969688	1.00176	1.04672
Tropical Africa	Irrigated Rice	0	0	0	0	0	0	0	0	0	0	0	0	0	0	0	7.63745e-05	9.54592e-05	0.000119313	0.000149127	0.000186392	0.000284288	0.000998922	0.00154746	0.0035906	0.00617169	0.00996794	0.0132333	0.0196227	0.0236065	0.0249461	0.0262996	0.0276697	0.0291378	0.0305324	0.0319597	0.0334274	0.0349449	0.0364919	0.0375487	0.0386989	0.0399683	0.0414222	0.0430765	0.0448468	0.0469116	0.0493716	0.0519771	0.0537942
Tropical Africa	Rangeland	0	0	0	0	0	5.38472	9.98127	17.2398	29.3822	51.5127	78.9367	84.533	89.8393	95.8626	102.797	110.784	119.822	130.136	141.472	150.46	158.791	168.921	178.295	191.119	204.055	209.731	220.533	264.826	258.626	262.404	266.283	270.36	274.693	279.328	284.462	290.558	297.96	307.898	322.588	329.322	338.292	340.474	343.897	347.978	353.001	364.699	371.411	382.347
Tropical Africa	Pasture	0	0	0	0	0	0.00024984	0.000553283	0.00576971	0.0200761	0.05065	0.0993912	0.125416	0.178928	0.304334	0.494104	0.83789	1.61522	2.96751	5.68391	7.59699	9.69195	11.1836	12.877	15.5708	18.3937	20.6284	27.6597	36.959	36.3413	37.0869	37.9625	38.7982	39.6836	40.6621	41.6964	42.6167	43.6512	44.6932	45.8105	46.8687	49.7835	53.3276	57.0439	60.8544	63.9275	67.7685	71.424	76.2125
China	Rainfed other crops	0	0	7.41876e-05	0.0293226	0.121934	0.463633	1.3344	3.02525	6.16265	12.083	23.2643	21.1568	18.2071	9.34574	13.2485	16.9409	23.4523	20.0848	16.4161	20.1047	19.3144	47.0533	55.176	43.982	40.3545	52.1992	57.1534	60.0231	62.7363	65.4868	66.7975	67.287	67.945	68.4992	69.1457	70.1633	72.1441	74.5353	77.0941	79.5212	79.9723	79.9018	79.8918	80.0927	79.2796	78.8801	80.4315	82.0544
China	Irrigated other crops	0	0	0	0	0	0	0.0145121	0.0287857	0.0384464	0.140469	0.091	0.0923054	0.157149	0.552244	0.420611	0.305346	0.0988826	0.25584	0.427453	0.469949	0.550205	0.124225	0.127895	0.129758	0.132808	0.169318	0.174767	0.180952	0.212698	0.226168	0.252597	0.271384	0.293992	0.316709	0.340163	0.363561	0.386902	0.410183	0.491189	0.572135	0.653623	0.734924	0.821084	1.01695	2.81488	3.46109	3.98599	4.28675
China	Rainfed Rice	0	0	0.000619526	0.00149923	0.00362409	0.0131449	0.00652594	0.00937725	0.01532	0.0203206	0.320145	0.17894	0.0702984	0.044662	0.0597307	0.0749906	0.108273	0.0982978	0.0999484	0.115218	0.117586	0.678936	0.912909	0.424633	0.245586	0.296382	0.395706	0.425704	0.339716	0.425372	0.380439	0.481756	0.942796	1.10093	1.34052	2.17349	2.41422	2.11364	2.39595	1.96672	1.96781	1.72444	1.41022	0.741815	0.646997	0.637076	0.636244	0.659414
China	Irrigated Rice	0	0	0	0	0	0	0.0196238	0.0472578	0.113641	0.163705	0.819	0.830748	0.779369	0.396712	0.541136	0.669647	0.889943	0.747576	0.591522	0.711494	0.660667	1.11803	1.15106	1.16782	1.19528	1.52386	1.57291	1.62749	1.82159	2.03396	2.23338	2.44043	2.64367	2.84679	3.04918	3.25162	3.45412	3.65669	4.31014	4.96366	5.61662	6.26978	6.91769	7.45668	6.3932	6.48144	6.69101	7.12472
China	Rangeland	0	0	0	0	5.48907	12.7573	20.1622	31.9258	50.2587	53.8034	82.5522	42.0173	39.685	31.6981	36.4516	40.8248	47.5253	45.3836	43.0903	47.9625	48.7874	81.407	97.4556	93.1845	73.673	82.7263	86.4309	88.0887	90.869	98.2059	102.525	110.197	125.648	134.702	145.501	169.086	179.834	179.009	200.276	206.431	222.577	234.271	244.474	244.999	218.81	219.722	229.333	244.391
China	Pasture	0	0	0	0	0	0.000812316	0.030717	0.272583	1.43946	1.45015	10.9093	3.68686	2.80692	0.866091	1.56328	2.27965	3.72691	2.91103	2.13915	2.84807	2.60573	8.69805	10.6548	7.38251	6.36234	8.91367	9.97446	10.3784	11.0153	13.1705	14.2508	16.4042	21.0043	23.3297	26.2427	33.4313	36.4691	35.5341	42.2327	43.5939	48.3249	51.2016	53.5071	52.1996	42.212	41.5911	41.8777	43.7019
South Asia	Rainfed other crops	0	0	0	1.43319	2.56699	4.59771	8.21768	14.721	26.3705	47.2385	84.6186	80.7427	76.8648	72.988	69.1693	65.4306	61.7881	58.2554	54.843	51.5575	48.4032	45.384	42.5011	39.7544	37.143	34.6644	32.3168	35.789	38.5515	41.5244	44.724	48.1669	51.8716	55.8583	60.1471	64.7618	69.7261	75.0676	79.6682	84.5147	89.6732	95.3638	101.218	100.793	100.114	99.4171	97.7633	97.9447
South Asia	Irrigated other crops	0	0	0	0	0	0	0.0171135	0.0278845	0.0448236	0.0708398	0.109592	0.0741672	0.0403866	0.0383833	0.0364113	0.0344807	0.0325994	0.0307758	0.0290143	0.027318	0.0256902	0.0241324	0.0226457	0.0212294	0.019894	0.0186174	0.0174085	0.0193428	0.0249203	0.0304978	0.0360752	0.0416002	0.0472302	0.0527846	0.0583852	0.0639005	0.0694855	0.0750694	0.802992	1.64991	2.34115	3.05687	3.38378	3.57859	3.49867	3.32792	2.18234	2.8684
South Asia	Rainfed Rice	0	0	0	0.00754348	0.0143755	0.027363	0.0260094	0.0493788	0.0936095	0.177181	0.33479	0.350016	0.366598	0.414504	0.461848	0.508532	0.554476	0.599619	0.643914	0.687327	0.729834	0.771423	0.812087	0.851824	0.890643	0.928549	0.965559	1.1912	1.17069	1.15016	1.12959	1.109	1.08838	1.06774	1.04706	1.02636	1.00563	0.984868	1.05646	1.31782	1.73485	2.12741	2.90877	3.82224	5.01044	6.28946	8.54332	8.96554
South Asia	Irrigated Rice	0	0	0	0	0	0	0.0260094	0.0493788	0.0936095	0.177181	0.33479	0.350016	0.363598	0.345569	0.327812	0.310428	0.293496	0.277076	0.261217	0.245951	0.231302	0.217283	0.203902	0.191159	0.179046	0.167557	0.156677	0.174085	0.224282	0.27448	0.324677	0.374874	0.425072	0.475269	0.525467	0.575664	0.625861	0.676059	1.05646	1.31782	1.73485	2.12741	2.90877	3.82225	5.01044	6.28947	8.54331	8.96555
South Asia	Rangeland	0	0	0	0	0	0	3.16639e-07	0.073455	0.112471	0.151504	0.25769	0.502502	0.519148	0.536983	0.554809	0.572958	0.590419	0.60641	0.623667	0.639075	0.655769	0.673276	0.689938	0.708219	0.725696	0.743438	0.759631	0.912285	0.93169	0.949427	0.968955	0.990694	1.01532	1.03896	1.06674	1.0978	1.12512	1.15447	1.18434	1.1931	1.25875	1.2459	1.3601	1.43129	1.50448	1.51995	1.65039	1.68323
South Asia	Pasture	0	0	0	0	0	0	0	0.0124911	0.0594236	0.192297	0.429937	0.872753	0.9216	0.969258	1.01692	1.06425	1.11228	1.16178	1.21002	1.26006	1.30886	1.35685	1.40567	1.45288	1.50089	1.54864	1.59798	1.9692	2.01383	2.06013	2.10463	2.14693	2.18633	2.22671	2.26297	2.29595	2.33265	2.36734	2.40151	2.38693	2.51338	2.45638	2.69144	2.82981	2.96618	2.97166	3.23286	3.28514
SE Asia	Rainfed other crops	0	0	0	0.18359	0.283517	0.487725	0.961361	2.83419	3.91502	5.47499	8.44351	8.82089	9.18685	9.3053	9.42102	9.53803	9.66033	9.90662	10.1512	10.5396	10.915	11.4632	12.0361	11.373	12.8415	13.9679	16.804	19.0817	19.6723	20.2745	20.9015	21.554	22.2341	23.1159	24.0331	24.9871	25.9782	27.0072	27.4844	28.13	28.4086	29.5224	29.6252	31.1561	32.4518	34.2606	35.8659	38.7539
SE Asia	Irrigated other crops	0	0	0	0	0	0	0.100877	0.15103	0.224298	0.329583	0.479137	0.462044	0.442646	0.425574	0.406184	0.384961	0.362309	0.353457	0.340079	0.332209	0.318791	0.285845	0.253956	0.215583	0.205431	0.181761	0.191014	0.183323	0.249671	0.312641	0.375935	0.439075	0.502059	0.564883	0.627541	0.69003	0.752343	0.814476	1.20561	1.678	2.14432	2.572	2.99783	3.38434	3.7701	4.15368	4.50316	4.88975
SE Asia	Rainfed Rice	0	0	0	0.000178334	0.00040431	0.0102698	0.0181729	0.0353463	0.0761254	0.160453	0.34686	0.369775	0.394674	0.420924	0.447842	0.475491	0.503943	0.536871	0.570748	0.603571	0.634367	0.738227	0.844636	0.929106	1.0366	1.14165	1.22138	1.4056	1.41882	1.43407	1.45001	1.46616	1.48252	1.50626	1.53022	1.55439	1.57878	1.60339	1.61132	1.72666	2.05534	2.40274	2.79869	3.33924	3.97241	4.80232	6.23542	8.15815
SE Asia	Irrigated Rice	0	0	0	0	0	0	0.00184207	0.00460518	0.0115129	0.0290127	0.0732296	0.0803975	0.0862327	0.0931921	0.100248	0.107429	0.114773	0.127592	0.14067	0.158354	0.178253	0.191107	0.202451	0.203197	0.23347	0.254742	0.326416	0.399941	0.41894	0.441314	0.463366	0.485571	0.507932	0.530455	0.553142	0.575999	0.59903	0.622242	0.754507	0.805465	0.862487	0.958032	1.05574	1.19274	1.33039	1.4702	1.64412	1.78091
SE Asia	Rangeland	0	0	0	0	0.000366617	0.107513	0.170208	0.2333	0.546433	0.925138	1.62152	2.35633	2.91014	3.8648	5.65227	9.12546	9.23968	9.2019	9.16379	9.19774	9.21383	9.67374	10.1221	8.21203	8.89164	9.38576	11.0866	11.2822	11.443	11.6006	11.7768	11.9442	12.1178	12.3281	12.5283	12.7171	12.935	13.1605	13.3762	13.6164	13.9179	14.4305	14.9384	15.6566	16.3775	17.3151	18.4436	19.6667
SE Asia	Pasture	0	0	0	0	0	0.00019808	0.000714292	0.00275946	0.0132091	0.0806671	0.197587	0.306407	0.386514	0.493646	0.697278	1.07841	1.10369	1.10698	1.10477	1.1238	1.14408	1.30626	1.45917	1.16042	1.39527	1.68495	2.22971	2.40403	2.45818	2.52149	2.56898	2.62812	2.68387	2.78611	2.89819	3.02103	3.11455	3.20015	3.37082	3.52506	3.78714	4.10104	4.42993	5.28517	6.06742	6.98998	7.9292	8.84729
Pacific Dev.	Rainfed other crops	0	0	0	0	0	0	0.00286054	0.0172235	0.0216873	0.0284357	0.0238061	0.0346915	0.0455408	0.0664614	0.0870983	0.124943	0.16203	0.209964	0.271093	0.398154	0.455375	0.492358	0.31173	0.346856	0.428025	0.545998	0.724943	1.08512	1.17001	1.16722	1.16612	1.16492	1.16413	1.15406	1.14531	1.13671	1.136	1.13564	1.15808	1.18461	1.20309	1.21542	1.30231	1.46538	1.78956	2.7892	3.30232	4.95785
Pacific Dev.	Irrigated other crops	0	0	0	0	0	0	0	0	0	0	0	0.00094816	0.00130469	0.00201321	0.00269288	0.00395754	0.00516296	0.00727663	0.00889366	0.0110882	0.0110882	0.0114578	0.00926187	0.010148	0.0123503	0.0154908	0.0201012	0.0292057	0.0319963	0.034787	0.0375777	0.0403683	0.043159	0.0459497	0.0487403	0.051531	0.0543217	0.0571124	0.0796249	0.100968	0.123476	0.148705	0.211242	0.40012	0.593874	0.742463	0.632524	0.812385
Pacific Dev.	Rainfed Rice	0	0	0	0	0	0	0.00157918	0.00342268	0.00740747	0.0160063	0.0345279	0.0477839	0.0653437	0.100188	0.133135	0.194338	0.251756	0.368839	0.434308	0.478724	0.422929	0.415646	0.428713	0.464102	0.556849	0.686265	0.869921	1.22094	1.30348	1.25776	1.21154	1.16479	1.11748	1.05934	1.00087	0.942033	0.882793	0.823309	0.657414	0.488974	0.317832	0.143763	0.00105744	0.00142809	0.00175419	0.00204764	0.00253354	0.00287182
Pacific Dev.	Irrigated Rice	0	0	0	0	0	0	0	0	0	0	0	0.00853344	0.0117422	0.0181189	0.024236	0.0356178	0.0464666	0.0654897	0.080043	0.0997938	0.0997938	0.10312	0.0833569	0.0913318	0.111153	0.139417	0.180911	0.262851	0.287967	0.313083	0.338199	0.363315	0.388431	0.413547	0.438663	0.463779	0.488895	0.514011	0.69161	0.869143	1.04669	1.22424	1.36736	1.37969	1.38714	1.43943	1.7509	1.80161
Pacific Dev.	Rangeland	0	0	0	0	0	0.0167601	0.0240614	0.0343451	0.048573	0.0710407	0.0959458	0.148027	0.192538	0.259229	0.29129	0.351314	0.405513	0.517121	0.553478	0.553316	0.53728	0.527024	0.59723	0.589105	0.564714	0.879985	1.23041	1.64166	1.58282	1.56695	1.56359	1.56403	1.57097	1.57644	1.57735	1.59702	1.84996	1.99876	2.55176	3.41995	4.88548	7.48513	12.2514	21.2035	32.4989	45.7761	69.2975	98.4863
Pacific Dev.	Pasture	0	0	0	0	0	0	0	0	5.7955e-05	0.000171337	0.000482129	0.00232056	0.00988572	0.0451008	0.110777	0.230848	0.347914	0.575176	0.742901	0.909883	0.797271	0.806944	0.813727	0.961525	1.27895	1.68958	2.23599	3.23825	3.5049	3.46189	3.40516	3.34332	3.27364	3.17837	3.0868	2.97567	2.86437	2.76121	2.75839	2.75444	2.75369	2.75167	2.75126	2.80087	2.87634	3.08925	3.54677	4.14573
	total	0	0	0.0106691	2.18333	16.0441	42.1346	76.0861	121.109	185.916	268.518	440.486	404.535	409.949	396.962	407.989	420.682	442.074	458.816	483.602	530.221	552.497	669.317	749.81	765.483	712.864	778.616	856.184	962.399	977.404	1009.86	1037.07	1068.63	1113.54	1153.57	1196.3	1259.34	1308.68	1347.91	1429.99	1491	1581.84	1679.94	1777.9	1878.42	1910.88	2085.22	2258.85	2506.84
		-10000	-9000	-8000	-7000	-6000	-5000	-4000	-3000	-2000	-1000	0	100	200	300	400	500	600	700	800	900	1000	1100	1200	1300	1400	1500	1600	1700	1710	1720	1730	1740	1750	1760	1770	1780	1790	1800	1810	1820	1830	1840	1850	1860	1870	1880	1890	1900
	Rainfed other crops	0	0	0.0100495	1.79451	3.86856	10.1336	26.8945	46.9023	70.6994	114.041	192.465	192.199	189.625	176.255	172.338	166.862	165.603	163.773	163.43	174.448	177.818	212.682	242.009	246.883	219.647	252.967	264.216	284.857	296.524	308.692	319.925	330.795	344.644	356.328	368.663	382.224	397.376	415.464	434.182	453.995	477.653	511.356	544.165	581.119	606.671	667.152	722.658	777.09
	Irrigated other crops	0	0	0	0.00144893	0.0391012	0.181585	0.974808	1.1798	1.33346	1.6802	2.15018	2.20376	2.36707	2.80854	2.70329	2.60461	2.39237	2.68477	2.96626	3.09268	3.21145	2.5335	2.33593	2.39604	2.09872	2.06482	1.9526	1.79516	1.98614	2.14831	2.32442	2.49337	2.6664	2.83991	3.01427	3.18869	3.36314	3.53743	5.9864	8.59689	11.0412	13.4825	15.5767	17.6184	21.1309	23.3207	24.1263	27.0179
	Rainfed Rice	0	0	0.000619526	0.00922103	0.0184039	0.0507777	0.0522874	0.0975251	0.192758	0.374425	1.03696	0.9474	0.898168	0.982069	1.10524	1.25753	1.42532	1.61536	1.76969	1.92032	1.96786	2.68928	3.11372	2.82849	2.95325	3.39736	4.02153	5.17406	5.16058	5.1953	5.1	5.15131	5.56272	5.6677	5.85456	6.63566	6.82568	6.47689	6.66665	6.43495	7.00772	7.34166	8.07878	8.88804	10.6437	12.7856	16.5554	19.0635
	Irrigated Rice	0	0	0	0	0	0	0.0474752	0.101242	0.224236	0.380849	1.2598	1.30508	1.27901	0.889581	1.02753	1.15402	1.37273	1.25162	1.11552	1.26816	1.25761	1.72814	1.7551	1.80068	1.85159	2.23643	2.43471	2.67823	2.98296	3.30266	3.60901	3.92281	4.23319	4.54366	4.85374	5.16416	5.47515	5.78686	7.16668	8.34458	9.68676	11.0311	12.7271	14.3509	14.6556	16.2902	19.4928	20.5625
	Rangeland	0	0	0	0.3686	12.0932	31.7274	48.0213	72.4106	111.357	148.007	219.7	189.664	197.319	200.589	215.446	234.002	255.978	268.271	282.925	303.381	311.52	360.997	391.485	395.17	389.532	410.515	458.728	519.206	521.345	538.847	553.327	571.646	597.985	619.985	643.511	681.081	707.938	726.558	774.227	803.733	851.538	893.837	939.932	982.917	984.268	1069.02	1155.28	1307.42
	Pasture	0	0	0	0.00955443	0.0248903	0.0411682	0.0957299	0.417609	2.10854	4.03447	23.8735	18.2168	18.4599	15.4386	15.3691	14.8018	15.3027	21.2202	31.3956	46.111	56.7224	88.6876	109.112	116.404	96.7813	107.435	124.832	148.688	149.406	151.676	152.788	154.625	158.444	164.209	170.405	181.048	187.699	190.09	201.764	209.899	224.91	242.895	257.418	273.531	273.509	296.659	320.736	355.68
	total	0	0	0.0106691	2.18333	16.0441	42.1346	76.0861	121.109	185.916	268.518	440.486	404.535	409.949	396.962	407.989	420.682	442.074	458.816	483.602	530.221	552.497	669.317	749.81	765.483	712.864	778.616	856.184	962.399	977.404	1009.86	1037.07	1068.63	1113.54	1153.57	1196.3	1259.34	1308.68	1347.91	1429.99	1491	1581.84	1679.94	1777.9	1878.42	1910.88	2085.22	2258.85	2506.84
check	cropland	0	0	6.1e-10	-4.7069e-07	-2.187e-07	-4.2446e-06	-1.15908e-05	8.3264e-06	-3.0571e-05	-1.55096e-05	-4.6702e-05	-0.00104605	-0.00158349	-0.00217273	-0.00310802	-0.00455614	-0.0057731	-0.00793142	-0.0101721	-0.0119048	-0.0118973	-0.0120514	-0.0111746	-0.0107293	-0.0132793	-0.0163574	-0.0212807	-0.0311518	-0.0295613	-0.0323427	-0.036814	-0.039647	-0.0431345	-0.0443001	-0.0462089	-0.0478552	-0.0490857	-0.0490792	-0.058711	-0.0749431	-0.0753057	-0.0501585	-0.0532151	-0.0716382	-0.0890441	-0.0902468	-0.100115	-0.125
	grazing	0	0	0	1.7e-07	1.156e-06	9.91974e-06	1.00472e-05	8.24453e-05	-7.43766e-06	-0.00135132	0.00182542	-0.000541899	-0.00013032	0.000349448	0.0010906	0.000132891	0.000207192	0.00106874	-0.00315245	0.000172386	-0.00245264	-0.00438342	0.00177661	0.000622223	-0.00420607	-0.00317703	-0.00289272	-0.00486056	-0.00179644	-0.00525832	-0.0077202	-0.00837715	-0.00766901	-0.005056	-0.00732821	-0.000743542	-0.00581888	-0.00251481	-0.0221467	-0.0131154	-0.00626042	-0.0135563	-0.0110928	-0.0129736	-0.0117345	-0.0202731	-0.0161138	-0.0248359
	rainfed	0	0	0.0106691	1.80373	3.88697	10.1844	26.9468	46.9998	70.8921	114.415	193.502	193.146	190.524	177.237	173.443	168.119	167.028	165.389	165.2	176.368	179.785	215.372	245.122	249.711	222.601	256.365	268.237	290.031	301.684	313.887	325.025	335.946	350.207	361.996	374.517	388.86	404.201	421.94	440.849	460.43	484.661	518.697	552.243	590.007	617.314	679.937	739.214	796.153
	irrigated	0	0	0	0	0	0	3.8e-08	-1.4e-07	-1.8514e-07	5.37e-09	1.6034e-07	1.7813e-07	-1.136e-07	-2.256e-07	-1.4841e-06	4.2249e-07	-7.5042e-07	-2.7042e-07	-6.0438e-07	-2.8538e-07	-8.9509e-07	3.8695e-07	-1.4843e-07	6.523e-07	3.67e-07	-5.39e-07	9.43e-07	-2.8467e-07	-1.76645e-06	1.46816e-06	-1.2722e-07	-1.7126e-06	-2.52073e-06	1.96928e-06	-9.989e-08	-6.182e-07	-2.34e-08	3.2001e-06	-1.03829e-06	-2.95564e-06	-3.50562e-06	3.44179e-06	1.98737e-05	-6.14214e-06	2.72262e-06	1.40691e-06	1.07031e-05	-1.1901e-05
	rice	0	0	0	0	0	6.93889e-18	-4e-09	-1e-08	9e-09	1.18e-07	-1.3065e-06	-5.598e-07	6.86e-08	-1.646e-07	-2.597e-07	-1.1681e-07	2.0578e-07	-3.8792e-07	3.0982e-07	5.1142e-07	2.0781e-07	-8.4995e-07	-1.97843e-06	6.061e-07	3.118e-07	8.969e-07	-7.705e-07	1.20783e-06	7.2855e-07	-1.07884e-06	6.5028e-07	-1.9062e-06	-2.8073e-07	2.79738e-06	-2.04709e-06	4.456e-07	7.0016e-06	-2.21489e-06	6.26048e-06	-4.59707e-06	-6.29603e-06	1.37531e-05	9.7787e-06	-7.2691e-06	5.4556e-06	-6.4271e-06	7.8561e-06	-4.9966e-05
[truncated: 26 more columns]

## Sheet: for paper
Regional cropland area estimates (million ha)
	4k BCE	3k BCE	2k BCE	1k BCE	1 CE	800 CE	1100 CE	1400 CE	1700 CE	1800 CE	1850 CE	1900 CE	1920 CE	1950 CE	1960 CE	2000 CE	2015 CE
North America	0	0	0.0285859	0.212738	0.424982	0.61659	0.84156	1.14207	0.773049	8.29946	43.842	152.802	198.771	232.497	236.569	230.232	199.063
Latin America	1.09959	3.78177	5.44875	6.29533	7.26022	11.6199	16.1356	20.8243	9.26394	16.4912	21.0895	33.0654	51.6692	82.7932	102.995	161.94	205.221
Europe	1.01773	3.26434	7.23444	14.3621	33.3621	25.8507	41.8072	49.2234	76.1976	99.3775	122.312	147.091	150.628	155.245	156.487	135.801	124.298
USSR	0.515103	1.40102	1.57085	2.87008	3.21142	5.45538	8.56757	12.3794	22.254	48.3235	72.1583	132.755	156.354	195.806	234.282	203.275	196.741
N.Africa_M.East	14.3089	17.6031	19.1335	23.8224	29.0534	26.7149	23.8508	20.4473	24.0099	26.6378	34.1129	43.2272	47.735	64.2208	77.8496	88.3688	86.9314
Tropical Africa	0.279118	1.22647	1.84512	2.80413	4.30677	13.7147	19.358	26.9482	38.9038	42.0379	48.2117	60.7639	69.8903	113.429	146.046	195.275	261.501
China	1.37506	3.11067	6.33005	12.4074	24.4944	17.5338	48.9731	41.9267	62.2555	80.7084	89.0259	94.0732	103.198	109.952	110.449	135.092	126.595
South Asia	8.28681	14.8476	26.6025	47.6637	85.3978	55.7771	46.3969	38.2325	37.1737	76.8036	110.398	118.703	122.108	148.343	157.089	167.754	168.765
SE Asia	1.08225	3.02516	4.22695	5.99404	9.34267	11.2024	12.6782	14.3164	21.0696	30.0457	36.4615	53.5536	68.814	91.5239	104.501	137.031	163.224
Pacific Dev.	0.00443971	0.0206462	0.0290948	0.044442	0.058334	0.785776	1.01209	1.09725	2.5724	2.49067	2.88198	7.57471	13.7326	29.5769	39.7877	54.536	56.1944
World	27.969	48.2809	72.4498	116.476	196.912	169.271	219.621	226.538	294.473	431.216	580.494	843.609	982.9	1223.39	1366.06	1509.31	1588.53
Other global estimates
Houghton et al (1983)									264
Esser (1991)												1390	1570	1910
Richards (1990)									265		537		913	1170
Ramankutty and Foley (1999)									405	678	821	1144	1301	1528	1688
Klein Goldewijk [2001], HYDE 2.0									266	402	537	813	944	1230
Pongratz et al (2008)						136	197	233	401
Klein Goldewijk (2011), HYDE 3.1					129.691				300.05	418.144	561.876	849.262	994.922	1213.77		1530.86
FAO (2015)															1371.61	1518.6	1591.36
		voor grafiek			1	800	1100	1400	1700	1800	1850	1900	1920	1950	1960	2000	2015
				HYDE 3.2	196.912	169.271	219.621	226.538	294.473	431.216	580.494	843.609	982.9	1223.39	1366.06	1509.31	1588.53
				Houghton et al (1983)					264
				Esser (1991)								1390	1570	1910
				Richards (1990)					265
				Ramankutty and Foley (1999)					405	678	821	1144	1301	1528	1688
				Klein Goldewijk [2001], HYDE 2.0					266
				Pongratz et al (2008)		136	197	233	401
				Klein Goldewijk (2011), HYDE 3.1	129.691	127	177	190	300.05	418.144	561.876	849.262	994.922	1213.77		1530.86
				FAO (2015)
Regional grazing and area estimates (million ha)
	4k BCE	3k BCE	2k BCE	1k BCE	1 CE	800 CE	1100 CE	1400 CE	1700 CE	1800 CE	1850 CE	1900 CE	1920 CE	1950 CE	1960 CE	2000 CE	2015 CE
North America	0	0	0	0	0	0	0	0	4.16578	18.1799	36.0974	157.957	181.347	278.102	280.821	251.764	266.712
Latin America	0	0	0	0	0	0	1.33744e-05	0	29.4502	45.36	73.1386	152.748	216.664	370.667	457.246	553.52	561.217
Europe	0.844281	1.70387	3.74359	7.41389	18.3809	31.8557	81.1962	77.5135	91.8285	80.2443	94.2864	103.049	103.476	99.9657	90.6735	78.7168	72.2518
USSR	12.6321	14.7366	17.4656	20.6042	24.0367	38.5368	47.1702	58.6201	79.7852	118.882	148.538	225.693	263.324	274.009	300.973	361.738	362.253
N.Africa_M.East	4.27098	6.58739	10.3761	15.7858	26.0555	38.144	36.7644	33.339	40.9651	62.2057	107.944	140.887	156.172	195.974	250.593	307.78	293.039
Tropical Africa	9.98182	17.2456	29.4023	51.5633	79.0364	147.153	180.101	222.447	301.783	352.59	400.937	458.543	500.107	696.985	799.643	804.946	811.266
China	20.1929	32.1985	51.6982	55.2524	93.463	45.2291	90.1045	80.0316	98.4636	214.541	297.975	288.084	317.009	311.432	367.16	519.906	506.132
South Asia	3.16639e-07	0.0859462	0.171895	0.3438	0.687627	1.83368	2.03012	2.2266	2.88148	3.52174	4.05147	4.96837	4.64056	6.67368	13.9213	10.8453	10.2438
SE Asia	0.170922	0.23606	0.559642	1.0058	1.81911	10.2685	10.98	10.2871	13.6863	16.3606	19.3685	28.5139	34.7892	46.284	53.9126	55.0626	55.4749
Pacific Dev.	0.0240614	0.0343451	0.0486309	0.071212	0.096428	1.29637	1.33396	1.84367	4.87991	4.75996	15.0026	102.632	179.719	332.122	394.596	378.703	344.566
World	48.1171	72.8283	113.466	152.04	243.576	314.317	449.68	486.309	667.889	916.645	1197.34	1663.08	1957.25	2612.22	3009.54	3322.98	3283.15
Other global estimates
Houghton et al (1983)									526
Pongratz et al (2008)						144	198	227	370
Klein Goldewijk [2001], HYDE 2.0									524	942	1310	1955	2282	2930
Klein Goldewijk (2011), HYDE 3.1					106.172				324.334	512.706	721.414	1293.81	1769.22	2464.39		3429.02
FAO (2015)															3095.34	3423.56	3359.43
		voor grafiek			1	800	1100	1400	1700	1800	1850	1900	1920	1950	1960	2000	2015
				HYDE 3.2	243.576	314.317	449.68	486.309	667.889	916.645	1197.34	1663.08	1957.25	2612.22	3009.54	3322.98	3283.15
				Houghton et al (1983)					526
				Pongratz et al (2008)		144	198	227	370
				Klein Goldewijk [2001], HYDE 2.0					524	942	1310	1955	2282	2930
				Klein Goldewijk (2011), HYDE 3.1	106.172				324.334	512.706	721.414	1293.81	1769.22	2464.39		3429.02
				FAO (2015)											3095.34	3423.56	3359.43
Regional actual irrigated area estimates (million ha)
	4k BCE	3k BCE	2k BCE	1k BCE	1 CE	1000 CE	1500 CE	1700 CE	1800 CE	1900 CE	1960 CE	2000 CE	2015 CE
North America	0	0	0	0	0	0.00521395	0.00843669	0.005057	0.0166857	3.18434	15.5797	22.3371	22.0096
Latin America	0	0	0	0.03489	0.114679	0.24685	0.381976	0.134365	0.343564	2.19002	5.75108	14.0574	18.4563
Europe	0	0	0	0	0.0374434	0.0787127	0.133597	0.173114	0.344216	2.90451	6.89715	11.9121	11.63
USSR	0	0	0	0	0.0544842	0.121344	0.193579	0.254904	0.672096	3.23727	6.37991	13.0804	13.1449
N.Africa_M.East	0.842305	0.972104	1.03137	1.11537	1.28445	1.91261	1.05194	0.934552	0.917722	2.75308	10.1279	20.7816	23.1835
Tropical Africa	0	0	0	0	0.0121731	0.0285397	0.06096	0.0942046	0.204165	0.781136	2.43364	5.41679	5.70886
China	0.0341359	0.0760435	0.152087	0.304174	0.909999	1.21087	1.69318	1.80845	4.06687	11.4115	40.0051	48.9763	62.1217
South Asia	0.0431229	0.0772634	0.138433	0.24802	0.444382	0.256992	0.186174	0.193428	0.751128	11.8339	24.3616	56.7438	63.7679
SE Asia	0.102719	0.155635	0.235811	0.358596	0.552367	0.497044	0.436503	0.583265	1.43672	6.67066	18.3482	39.6845	47.0789
Pacific Dev.	0	0	0	0	0	0.110882	0.154908	0.292057	0.571123	2.61399	3.44487	4.21478	4.4505
World	1.02228	1.28105	1.5577	2.06105	3.40998	4.46906	4.30126	4.47339	9.32429	47.5804	133.329	237.205	271.552
Siebert et al (2008)								4.507	10.524	53.246		278.934
Siebert et al (2014)												255.186
Framji et al (1981)										40
Michael, A. (2008)										40
Li, et al (2009)										50
Siebert et al (2015)										62.992	144.474	262.941
Freydank and Siebert (2008)								5.13463	10.6494	53.2472
FAO
		voor grafiek			1	1000	1500	1700	1800	1900	1960	2000	2015
				HYDE 3.2	3.40998	4.46906	4.30126	4.47339	9.32429	47.5804	133.329	237.205	271.552
				Siebert et al (2008)				4.507	10.524	53.246		278.934
				Siebert et al (2014)								255.186
				Framji et al (1981)						40
				Michael, A. (2008)						40
				Li, et al (2009)						50
				Siebert et al (2015)						62.992	144.474	262.941
				Freydank and Siebert (2008)				5.13463	10.6494	53.2472
				FAO
Regional rice area estimates (million ha)
	4k BCE	3k BCE	2k BCE	1k BCE	1 CE	1000 CE	1500 CE	1850 CE	1900 CE	1930 CE	1960 CE	2000 CE	2015 CE
North America	0	0	0	0	0	0	0	0.00256564	0.146	0.391	0.643	1.22985	1.24019
Latin America	0	0	0	0	0	0	0	0.0731995	0.291343	1.10439	4.50822	6.38002	6.15704
Europe	0	0	0	0	0	0.024622	0.0543498	0.143084	0.27578	0.290509	0.324195	0.409315	0.555166
USSR	0	0	0	1.72465e-05	4.67777e-05	0.00793481	0.0151142	0.0510655	0.0723227	0.0876022	0.118	0.499022	0.499815
N.Africa_M.East	0	0	0.00547327	0.0109508	0.0327334	0.058574	0.0894212	0.213677	0.281294	0.412066	0.59829	1.35735	1.02161
Tropical Africa	0	0	0.000295497	0.000447668	0.000640169	0.0596045	0.336481	0.953972	1.10051	1.51013	2.54381	6.89676	12.343
China	0.0261497	0.0566351	0.128961	0.184026	1.13914	0.778254	1.82025	8.32792	7.78412	12.5446	18.7927	20.6422	21.0416
South Asia	0.0520188	0.0987577	0.187219	0.354361	0.669579	0.961136	1.09611	5.81755	17.931	18.1123	22.2078	28.5665	27.4252
SE Asia	0.0200149	0.0399515	0.0876383	0.189466	0.42009	0.81262	1.39639	3.85443	9.93906	16.3576	25.1158	37.1508	45.1401
Pacific Dev.	0.00157918	0.00342268	0.00740747	0.0160063	0.0345279	0.522723	0.825682	1.36842	1.80448	2.07229	2.15309	1.2704	1.03871
World	0.0997626	0.198767	0.416994	0.755275	2.29676	3.22547	5.63379	20.8059	39.626	52.8825	77.0049	104.402	116.462
Fuller et al (2010), wet rice	0.05	0.2	0.4	0.7	2.3
Fuller et al (2010), total rice	0.1	0.2	0.5	0.8	2.5
Barker and Herdt (1985)										81.251
FAO (2015), area harvested											115.363	154.459
	ff checken !!!!!
	-4000	-3000	-2000	-1000	1	1000	1500	1700	1800	1900	1960	2000	2015
HYDE 3.2	0.0997626	0.198767	0.416994	0.755275	2.29676	3.22547	5.63379	20.8059	39.626	52.8825	77.0049	104.402	116.462
Fuller et al (2010), wet rice	0.05	0.2	0.4	0.7	2.3
Fuller et al (2010), total rice	0.1	0.2	0.5	0.8	2.5
Barker and Herdt (1985)										81.251
FAO (2015), area harvested											115.363	154.459
Total agricultural land (Mha)
	-4000	-1000	1	100	500	1000	1500	1600	1850
HYDE 3.2	76.0861	268.517	440.488	404.534	420.677	552.482	778.596	856.16	1777.83
Kaplan et a (2010)	186	871	1360	1440	1530	1800	2300	2160	2940
factor diff	2.4446	3.24374	3.08749	3.55965	3.63699	3.25802	2.95403	2.52289	1.6537
in Mha		-2000	1	1000	1500	1600	1700	1800	1900	2000
North America	Rainfed other crops	0.0285859	0.424982	0.770688	1.24708	0.589623	0.767993	8.28278	149.618	207.894
North America	Irrigated other crops	0	0	0.00521395	0.00843669	0.00398899	0.005057	0.0166644	3.03834	21.1072
North America	Rainfed Rice	0	0	0	0	0	0	0	0	0
North America	Irrigated Rice	0	0	0	0	0	0	2.1277e-05	0.146	1.22985
North America	Rangeland	0	0	0	0	1.49691	4.16178	17.8968	127.47	197.75
North America	Pasture	0	0	0	0	0	0.00400521	0.283184	30.4881	54.015
Latin America	Rainfed other crops	5.44875	7.14554	14.3276	25.2431	8.99231	9.12394	16.1311	30.6616	144.812
Latin America	Irrigated other crops	0	0.114679	0.24685	0.381976	0.100317	0.121656	0.318911	2.11508	11.0477
Latin America	Rainfed Rice	0	0	0	0	0.00101555	0.00559492	0.0166561	0.216399	3.37034
Latin America	Irrigated Rice	0	0	0	0	0.00316536	0.0127085	0.024653	0.0749446	3.00967
Latin America	Rangeland	0	0	0	0.0463467	15.7085	27.6805	40.8724	129.4	396.497
Latin America	Pasture	0	0	0	0.0135655	0.509037	1.76968	4.48758	23.3479	157.023
Europe	Rainfed other crops	7.23444	33.3247	33.7244	61.162	71.3608	76.0168	99.0233	144.173	123.889
Europe	Irrigated other crops	0	0.0374434	0.0570797	0.0852796	0.0953018	0.104146	0.244365	2.64311	11.5028
Europe	Rainfed Rice	0	0	0.00298901	0.00603268	0.00750065	0.00767994	0.00993226	0.0143838	0
Europe	Irrigated Rice	0	0	0.021633	0.0483171	0.0659641	0.0689676	0.0998509	0.261396	0.409315
Europe	Rangeland	3.61463	7.85862	16.2574	8.91491	8.12322	7.64269	8.34432	12.6463	15.1742
Europe	Pasture	0.128954	10.5223	38.7499	69.0692	74.5525	84.1856	71.9001	90.4032	63.5426
USSR	Rainfed other crops	1.57085	3.15694	5.97532	15.3757	18.8476	21.9966	47.6484	129.517	190.195
USSR	Irrigated other crops	0	0.0544374	0.114242	0.179909	0.206889	0.23325	0.635487	3.16494	12.5814
USSR	Rainfed Rice	0	0	0.000832908	0.00144469	0.00180587	0.00258797	0.00298241	0	0
USSR	Irrigated Rice	0	4.67777e-05	0.0071019	0.0136695	0.0173884	0.021654	0.0366095	0.0723227	0.499022
USSR	Rangeland	17.4434	23.9802	39.9398	64.0037	71.2879	74.2682	96.9718	155.886	297.833
USSR	Pasture	0.0221903	0.0565319	0.452915	2.33183	3.79883	5.51715	21.9099	69.8073	63.9033
M.East, N. Africa, Turkey	Rainfed other crops	18.1021	27.7689	26.6187	19.7434	24.3391	22.9957	25.6624	40.474	67.5872
M.East, N. Africa, Turkey	Irrigated other crops	1.0259	1.25171	1.85403	0.973044	1.08393	0.843643	0.797485	2.47178	19.4243
M.East, N. Africa, Turkey	Rainfed Rice	0	0	0	0.0105213	0.0391969	0.0796334	0.0576674	0	0
M.East, N. Africa, Turkey	Irrigated Rice	0.00547327	0.0327334	0.058574	0.0788999	0.0980454	0.0909092	0.120237	0.281294	1.35735
M.East, N. Africa, Turkey	Rangeland	9.95097	24.3975	37.3371	34.0833	42.0709	38.7026	59.252	135.446	292.068
M.East, N. Africa, Turkey	Pasture	0.425169	1.65805	1.97165	1.55488	2.2735	2.26268	2.95333	5.44122	15.7111
Tropical Africa	Rainfed other crops	1.84482	4.29396	17.3129	28.8185	33.0874	37.9772	40.97	58.936	184.674
Tropical Africa	Irrigated other crops	0	0.0121731	0.0282554	0.0509921	0.0588849	0.0745819	0.167673	0.727342	3.75632
Tropical Africa	Rainfed Rice	0.000295497	0.000640169	0.0593202	0.326513	0.519449	0.835131	0.864444	1.04672	5.2363
Tropical Africa	Irrigated Rice	0	0	0.000284288	0.00996794	0.0132333	0.0196227	0.0364919	0.0537942	1.66047
Tropical Africa	Rangeland	29.3822	78.9367	158.791	209.731	220.533	264.826	307.898	382.347	526.054
Tropical Africa	Pasture	0.0200761	0.0993912	9.69195	20.6284	27.6597	36.959	44.6932	76.2125	278.893
China	Rainfed other crops	6.16265	23.2643	19.3144	52.1992	57.1534	60.0231	74.5353	82.0544	84.9679
China	Irrigated other crops	0.0384464	0.091	0.550205	0.169318	0.174767	0.180952	0.410183	4.28675	29.9976
China	Rainfed Rice	0.01532	0.320145	0.117586	0.296382	0.395706	0.425704	2.11364	0.659414	1.66342
China	Irrigated Rice	0.113641	0.819	0.660667	1.52386	1.57291	1.62749	3.65669	7.12472	18.9787
China	Rangeland	50.2587	82.5522	48.7874	82.7263	86.4309	88.0887	179.009	244.391	408.291
China	Pasture	1.43946	10.9093	2.60573	8.91367	9.97446	10.3784	35.5341	43.7019	111.619
South Asia	Rainfed other crops	26.3705	84.6186	48.4032	34.6644	32.3168	35.789	75.0676	97.9447	101.084
South Asia	Irrigated other crops	0.0448236	0.109592	0.0256902	0.0186174	0.0174085	0.0193428	0.0750694	2.8684	41.4322
South Asia	Rainfed Rice	0.0936095	0.33479	0.729834	0.928549	0.965559	1.1912	0.984868	8.96554	13.2548
South Asia	Irrigated Rice	0.0936095	0.33479	0.231302	0.167557	0.156677	0.174085	0.676059	8.96555	15.3116
South Asia	Rangeland	0.112471	0.25769	0.655769	0.743438	0.759631	0.912285	1.15447	1.68323	3.56268
South Asia	Pasture	0.0594236	0.429937	1.30886	1.54864	1.59798	1.9692	2.36734	3.28514	7.28264
SE Asia	Rainfed other crops	3.91502	8.44351	10.915	13.9679	16.804	19.0817	27.0072	38.7539	81.4599
SE Asia	Irrigated other crops	0.224298	0.479137	0.318791	0.181761	0.191014	0.183323	0.814476	4.88975	22.2667
SE Asia	Rainfed Rice	0.0761254	0.34686	0.634367	1.14165	1.22138	1.4056	1.60339	8.15815	19.7329
SE Asia	Irrigated Rice	0.0115129	0.0732296	0.178253	0.254742	0.326416	0.399941	0.622242	1.78091	17.4178
SE Asia	Rangeland	0.546433	1.62152	9.21383	9.38576	11.0866	11.2822	13.1605	19.6667	32.5148
SE Asia	Pasture	0.0132091	0.197587	1.14408	1.68495	2.22971	2.40403	3.20015	8.84729	22.5479
Pacific Dev.	Rainfed other crops	0.0216873	0.0238061	0.455375	0.545998	0.724943	1.08512	1.13564	4.95785	50.2274
Pacific Dev.	Irrigated other crops	0	0	0.0110882	0.0154908	0.0201012	0.0292057	0.0571124	0.812385	3.0382
Pacific Dev.	Rainfed Rice	0.00740747	0.0345279	0.422929	0.686265	0.869921	1.22094	0.823309	0.00287182	0.0938169
Pacific Dev.	Irrigated Rice	0	0	0.0997938	0.139417	0.180911	0.262851	0.514011	1.80161	1.17658
Pacific Dev.	Rangeland	0.048573	0.0959458	0.53728	0.879985	1.23041	1.64166	1.99876	98.4863	369.177
Pacific Dev.	Pasture	5.7955e-05	0.000482129	0.797271	1.68958	2.23599	3.23825	2.76121	4.14573	9.52613

## Sheet: cropland
Total cropland area (in 1000 km2)
region	-10000	-9000	-8000	-7000	-6000	-5000	-4000	-3000	-2000	-1000	0	100	200	300	400	500	600	700	800	900	1000	1100	1200	1300	1400	1500	1600	1700	1710	1720	1730	1740	1750	1760	1770	1780	1790	1800	1810	1820	1830	1840	1850	1860	1870	1880	1890	1900	1910
1	0	0	0	0	0	0	0	0	0	0	0	0	0	0	0	0	0	0	0	0	0	0	0	0	0	0	0	205.032	265.519	344.206	446.666	580.21	754.431	981.934	1279.28	2202.72	2979.21	4343.76	5938.61	8156.82	11256.6	15630.5	21779.8	35406.5	49081.3	60881.6	76355.7	83899.8	144868
2	0	0	0	0	0	0	0	0	285.859	2127.38	4249.82	4452.2	4664.19	4886.32	5118.99	5362.75	5618.11	5885.64	6165.9	6960.37	7759.02	8415.6	9372.36	10213.5	11420.7	12555.1	5936.12	7525.46	10413	13532.3	17187	21082.8	25586.6	30848.8	37231	45207.8	55441.7	78650.8	109020	150637	212940	304161	416640	591450	673116	1008775	1258080	1444119	1670491
3	0	0	0	0	0	279.674	903.552	2455.89	15356.5	19621.6	25591.5	27545.8	29649.1	31913.1	34350	36973.2	39796.5	42835.8	46106.9	54204.9	62613.9	72407.6	82574.4	93125.1	104071	115424	4711.1	19228.2	21266.6	23379.8	25570.4	27840.7	30192.7	32629.1	35152.3	37764.8	40469.2	43268.2	46164.4	49160.8	52260.3	55465.3	58779.6	62206	65747.7	69386.5	85275.1	102776	118394
4	0	0	0	0	0	364.62	1254.04	4329.54	4682.86	5044.28	5324.01	5819.88	6352.56	6943.22	7600.23	8333.41	9155.09	10080.1	11126.4	13434.6	15825.9	17390.6	19178.2	21254.5	23712.3	26689.5	10873.1	8249.52	8428.7	8647.64	8913.69	9235.86	9625.28	10095.8	10665	11423.9	12309.3	13349	14598.1	15964	18737.4	20674.5	23207.5	25383.4	27756	30425.6	33399.3	35386.9	41285.9
5	0	0	0	0	0	0	84.5923	169.186	338.37	676.739	1353.48	1446.37	1545.65	1651.73	1765.1	1886.25	2015.7	2154.04	2301.91	2342.7	2384.05	2641.12	2898.19	3155.28	3412.36	3936.44	1044.85	1365.88	1483.52	1612.52	1752.96	1907.5	2079.28	2268.55	2479.37	2715.54	2981.77	3284.11	4065.55	4992.82	6340.28	7696.54	9063.07	10441.8	11836.8	13168.1	16357.2	19819.4	24982.9
6	0	0	0	0	277.573	2536.29	8753.74	30863.1	34109.8	37610.7	40333.2	42209.6	44142.3	46128.3	48165	50245.9	52363.4	54507.6	56663.8	61001.8	64920.9	68917.2	72321.6	75088.5	77047.9	110201	74339.4	63795.8	67225.2	70785.3	74482.2	78325.2	82322.2	86483.4	90818.9	95341.9	100067	105011	97006.3	91971.4	101597	110330	119844	128402	132980	145112	162450	172671	223871
7	0	0	0	77.1177	1649.18	7752.69	41174.3	52995.8	47605.9	57814.7	74399.6	76323	78129.1	73687.7	69436.4	65320.2	61513.6	62348.2	64693.6	68107.3	71032.7	62612.8	56538.6	57447.9	49444.4	46716.2	59714.3	47178.7	47404.8	48289.1	49176.7	50068.4	50965.4	51868.8	52779.6	53699.1	54629.4	55573	57188.4	59345.1	66236.2	73083.4	79896.1	85497	92644.2	99895.8	109454	119091	127616
8	0	0	0	0	0	366.364	1551.68	6569.73	9407.02	13502.6	19451.3	22834.2	26951.5	31998.3	38224.3	45952.5	55605.7	67735.6	83064	95205.8	107892	119248	131310	148193	166880	186348	218833	257890	259385	260438	261666	263075	264673	266466	268468	270697	273167	275907	278942	282431	286293	290598	295430	300896	307640	315417	324589	335950	351582
9	0	0	0	0	0	229.737	1058.65	4924.81	7928.49	12907.8	21211.6	22670.4	24346.4	26291	28568.4	31262.6	34483.9	38381.5	43165.3	46639.7	50116.5	53357.3	56592.2	61363.6	66136.2	71262.9	77805.6	84349.3	85460.3	86396	87370.8	88389.4	89454.9	90574.8	91754.8	93003.8	94337.2	95758	100524	102193	109663	117187	124863	132890	141147	149735	158794	168555	179285
10	0	0	0	0	0	0	0	0	0	0	0	0	0	0	0	0	0	0	0	0	0	0	0	0	0	0.106063	1108.87	3167.97	6216.01	6097.55	5978.99	5860.43	5741.81	5623.14	5504.43	5385.67	5266.85	5147.99	5029.09	4910.13	4791.12	4672.08	5500.51	6782.71	8998.08	17811.1	21867.2	30505.9	40931.6
11	0	0	0	94.1097	1919.29	2986.19	6745.54	18753.6	45335.4	99691	268043	283965	282862	259673	233738	189968	152805	168422	193244	229112	261039	333732	462419	594005	382775	481312	566059	606386	622726	634596	646903	659151	693585	703454	712662	722652	730801	744266	756078	786684	808077	845794	889306	896692	921665	940365	954847	989878	1008273
12	0	0	0	7.31452	36.5726	687.303	3431.72	13889.8	27009	43929.5	65578	68597.7	70128.7	67091.2	64622.7	62093.2	59615.6	62553.2	65263.3	71387.7	77022	84340.4	112662	130502	109459	131705	149237	155590	166884	174727	182856	191290	200050	209158	218636	228503	238786	249509	260735	272494	293543	313693	333814	361395	387612	423027	457114	481036	510041
13	0	0	0	873.013	2619.04	16587.2	27179.2	36990.4	71066.5	101199	125282	134426	143323	131797	120417	109190	98104.9	106466	114451	124375	133776	96159.5	111009	124824	97997.9	102285	125789	127117	127841	128896	129931	130942	131926	132880	133799	134677	135510	136291	137012	137666	141398	144673	147910	151083	154161	155201	155774	156043	155912
14	0	0	0	0	0	285.152	1593.93	4224.92	4683.3	5117.83	5451.67	5983.64	6527.32	7084.7	7657.71	7947.05	8270.2	8918.41	9592.91	10296.6	11002.1	16528.7	24822.3	24835.9	24824.9	33032.7	41103.7	54327.4	59731.3	65504.9	71848.8	78820.3	86483.1	91704.2	97228.6	103072	109249	115775	122667	131170	140452	151711	159798	178068	196542	224204	256010	300510	357423
15	0	0	0	0	77.3079	404.906	1424.07	4968.69	5657.4	6389.56	7129.16	7600.02	8100.84	8633.17	9199.01	9800.23	10439.1	11117.5	11837.8	12256.2	12667.2	13486	14379.1	15254.9	16138.4	17144.3	19432	21532.9	23030.1	24456.1	26004.6	27694	29546.3	31588.2	33852.8	36379.9	39219.2	42431.9	46093.2	50296.3	55156.7	60818.7	67459.1	75300.9	84618.3	95756.1	109143	125310	144925
16	0	0	0	0	74.1944	1258.16	2133.03	4816.57	5367.84	17193.4	19533.4	21679.8	23837.2	26002.5	28176.5	28450.3	28730.9	30925.2	33123.1	35229	37305.6	55661.1	81420.7	86422.8	82830.4	105530	130201	146680	158476	176477	194526	212643	231390	249820	268359	287045	305935	325028	343692	365162	388910	457442	494325	565371	611726	701911	804534	901727	1118544
17	0	0	99.7536	446.945	2699.08	13880.1	74735.7	86045.2	72662.2	79210.6	90852.2	102120	116866	135866	120849	108580	98856.6	92751.3	88004.5	97870.5	80504.8	79735.6	77898.6	60885.6	57030.8	59057.7	70099.4	65803	67272.8	68028.9	68796.5	69576.2	70368.2	71172.2	71988.5	72817.7	73659	74513.5	101189	102199	106040	109690	113323	116934	121285	135118	148728	157138	165431
18	0	0	0	14407.4	25813.7	46250.7	82868.1	148476	266025	476637	853978	815168	776353	737865	699954	662840	626686	591628	557771	525180	493901	463969	435397	408186	382325	357791	334565	371737	399714	429796	462143	496923	534322	574542	617780	664276	714271	768036	825840	888003	954840	1026704	1103984	1119887	1136015	1152974	1170014	1187029	1204052
19	0	0	0	0	0	70.9513	266.068	997.754	1157.55	1314.19	1434.08	1870.26	2439.86	3183.43	4154.12	5420.56	7071.32	9219.32	12009.6	13118	14111.4	16337.3	20924.9	14992.7	16588.9	17800.3	20584.5	23239.4	25235.9	26524.8	27867.3	29263.4	30712.9	32215	33768.4	35370.8	37018.8	38708.1	40432.3	42183.6	41837.5	40988.3	40083.7	39342.7	38514.1	37437.4	36324.9	35080.5	33995.1
20	0	0	6.93714	308.218	1255.58	4696.83	13484.5	30108.9	62143	122760	243510	220718	189698	100208	138542	174482	238416	202638	163328	200885	192307	473394	552737	442037	402678	524072	572364	599315	625844	655169	668733	675499	687492	695368	704927	724083	746902	768376	802383	827927	840132	845178	850175	853493	852480	856753	880685	905651	936492
21	0	0	0	0	0	116.765	543.473	2241.23	2545.1	4841.2	8189.48	8893.09	9613.21	10354.1	11120.8	11920.3	12762.8	13663.3	14643.8	15421.3	16193.3	19882.8	23564.5	24976.9	28815.5	32637	38319.6	44584.3	46113.2	47719.3	49328.7	50941	52557.4	54177.9	55803.2	57433.9	59070.5	60714.5	64061.1	67413.2	72963.9	79236.8	85920.6	96934.7	107878	123640	149184	174786	210834
22	0	0	0	20.3317	88.5399	162.62	633.55	2715.15	4184.47	6050.23	8231	8769.62	9363.52	10019.8	10746.6	11553	12449	13446.2	14557.3	15796.6	17179.8	19354.5	21849	24706.1	31401.2	37693.1	41429.2	45918.9	47041.6	48194.1	49376.7	50590.3	51835.6	54917.7	58106.1	61404.1	64814.2	68339.7	68589.3	68699.1	68649.3	68454.2	68127.1	81183.2	92798.6	103115	112228	132702	153154
23	0	0	0	0	0	0	44.3971	199.787	278.564	380.464	500.698	820.902	1129.58	1743.01	2331.46	3426.38	4470.02	6300.01	7700.01	9600	9600	9920.01	8018.78	8785.97	10692.7	13411.6	17403.3	25285.8	27221	26973.5	26721.4	26464.5	26202.5	25756.2	25308.1	24858	24405.5	23950.7	24338.2	24701.5	25039.7	25351.3	25635.2	26184.3	26693.5	28143.9	30124.8	33054.5	36482.5
24	0	0	0	0	0	0	0	6.67437	12.3844	63.9565	82.6415	89.6227	97.294	105.579	114.431	124.114	134.467	145.653	157.758	170.896	185.214	200.936	219.201	246.457	279.802	321.245	373.226	438.115	461.539	486.839	514.3	544.271	577.178	613.536	653.976	699.267	821.88	956.011	1082.37	1193.46	1389.9	1825.09	3184.68	6281.82	11029.8	21587.5	26758	42692.7	65001.2
25	0	0	0	1817.35	2750.68	4700.56	9645.49	25295.2	35540	49048.9	77006.2	79667.2	82126.2	82074.6	81884	81584	81199.7	82133.8	82823.2	85117.6	87089.5	87544.8	87956.4	77524.3	82947.3	85120.9	105669	120193	124427	128692	133178	137895	142852	148055	153509	159218	165183	171403	177876	187216	192968	206707	210567	212428	214374	219913	220860	228047	244387
26	0	0	0	0	0	42.8662	180.851	770.108	1115.65	1630.86	2404.82	2869.47	3434.82	4125.51	4972.84	6016.76	7308.54	8913.91	10918	13456.4	15998.4	20974.8	25957.5	30946.6	36466.4	34448.2	39040	43630.8	36669.8	37293.4	37943.3	38623	39336	40085.8	40877.8	41717.2	42610.5	43566.8	48887.1	50195.4	51623.4	53843.9	56324.1	59113	61778.3	64825.7	68377.8	72628.7	77914.2
27	0	0	0	0	0	0	0	0	0	0	0	0	0	0	0	0	0	0	0	0	0	0	0	0	0	0	0	0	0	0	0	0	0	0	0	0	0	0	0	0	0	0	0	0	0	0	0	0	0
Total	0	0	106.691	18051.8	39260.7	103660	279690	482809	724498	1.16476e+06	1.96912e+06	1.96654e+06	1.94168e+06	1.80933e+06	1.77171e+06	1.71873e+06	1.70787e+06	1.69317e+06	1.69271e+06	1.80717e+06	1.84243e+06	2.19621e+06	2.49202e+06	2.53897e+06	2.26538e+06	2.6065e+06	2.72603e+06	2.94473e+06	3.06624e+06	3.19306e+06	3.30922e+06	3.42323e+06	3.57063e+06	3.69335e+06	3.82339e+06	3.97165e+06	4.12991e+06	4.31216e+06	4.53943e+06	4.77296e+06	5.05313e+06	5.43161e+06	5.80494e+06	6.21905e+06	6.53012e+06	7.19458e+06	7.82733e+06	8.43609e+06	9.34617e+06
check1 orig input hiscrop_best….xlsx	0	0	99.7535	18096.1	39186.8	103910	281536	486610	729409	1.17254e+06	1.99078e+06	1.97598e+06	1.94924e+06	1.81426e+06	1.7762e+06	1.72325e+06	1.71168e+06	1.69775e+06	1.69805e+06	1.81365e+06	1.84975e+06	2.20455e+06	2.50331e+06	2.55817e+06	2.28045e+06	2.62476e+06	2.74925e+06	2.97044e+06	3.09194e+06	3.21824e+06	3.3338e+06	3.44722e+06	3.60016e+06	3.72372e+06	3.85463e+06	4.00326e+06	4.1622e+06	4.34449e+06	4.57427e+06	4.80948e+06	5.09066e+06	5.47107e+06	5.84594e+06	6.26143e+06	6.57355e+06	7.24092e+06	7.87526e+06	8.48316e+06	9.3912e+06
rf_norice + rf_rice + ir_norice + ir_rice	0	0	106.691	18051.8	39260.7	103660	279690	482809	724498	1.16476e+06	1.96912e+06	1.96655e+06	1.9417e+06	1.80935e+06	1.77174e+06	1.71878e+06	1.70793e+06	1.69325e+06	1.69281e+06	1.80729e+06	1.84255e+06	2.19633e+06	2.49213e+06	2.53908e+06	2.26551e+06	2.60666e+06	2.72625e+06	2.94505e+06	3.06653e+06	3.19338e+06	3.30959e+06	3.42362e+06	3.57106e+06	3.69379e+06	3.82385e+06	3.97213e+06	4.1304e+06	4.31265e+06	4.54002e+06	4.77371e+06	5.05389e+06	5.43211e+06	5.80547e+06	6.21976e+06	6.53101e+06	7.19548e+06	7.82833e+06	8.43734e+06	9.34851e+06
total rainfed + total irri	0	0	106.691	18051.8	39260.7	103660	279690	482809	724498	1.16476e+06	1.96912e+06	1.96654e+06	1.94168e+06	1.80933e+06	1.77171e+06	1.71873e+06	1.70787e+06	1.69317e+06	1.69272e+06	1.80717e+06	1.84243e+06	2.19621e+06	2.49202e+06	2.53897e+06	2.26538e+06	2.6065e+06	2.72604e+06	2.94473e+06	3.06624e+06	3.19306e+06	3.30922e+06	3.42323e+06	3.57063e+06	3.69335e+06	3.82339e+06	3.97165e+06	4.12991e+06	4.31216e+06	4.53943e+06	4.77296e+06	5.05314e+06	5.43161e+06	5.80494e+06	6.21905e+06	6.53012e+06	7.19458e+06	7.82732e+06	8.43609e+06	9.34618e+06
Percentage cropland of total land area	#DIV/0!	#DIV/0!	0	3.93314e-09	-6.95352e-08	1.12869e-07	4.64085e-07	-1.67561e-07	2.72327e-07	3.29165e-07	-2.57272e-08	1.10022e-07	2.01498e-07	-3.3583e-07	7.9433e-08	1.15559e-06	1.06635e-07	-5.40416e-07	1.66789e-06	-2.27647e-07	-5.83428e-07	1.26324e-07	-2.72962e-07	3.53612e-07	-2.89171e-10	-2.38977e-08	5.44068e-07	-3.15764e-07	-2.24786e-07	-2.68158e-07	5.76329e-07	1.98807e-07	3.63238e-07	4.31404e-07	2.49972e-07	-2.98207e-07	8.27344e-07	-3.30989e-07	6.6624e-07	-3.50064e-07	2.07926e-07	-6.34311e-08	-3.36585e-07	6.05755e-07	2.77007e-08	-5.01859e-07	-5.44799e-07	-6.30143e-08	9.40364e-07
region	-10000	-9000	-8000	-7000	-6000	-5000	-4000	-3000	-2000	-1000	0	100	200	300	400	500	600	700	800	900	1000	1100	1200	1300	1400	1500	1600	1700	1710	1720	1730	1740	1750	1760	1770	1780	1790	1800	1810	1820	1830	1840	1850	1860	1870	1880	1890	1900	1910
1	0	0	0	0	0	0	0	0	0	0	0	0	0	0	0	0	0	0	0	0	0	0	0	0	0	0	0	2.29908e-05	2.97734e-05	3.85968e-05	5.00859e-05	6.50605e-05	8.45964e-05	0.000110107	0.000143449	0.000246997	0.000334067	0.000487078	0.000665913	0.000914647	0.00126224	0.00175269	0.00244223	0.00397022	0.00550362	0.00682683	0.00856198	0.00940792	0.0162445
2	0	0	0	0	0	0	0	0	3.14864e-05	0.000234324	0.000468104	0.000490396	0.000513745	0.000538212	0.00056384	0.00059069	0.000618817	0.000648284	0.000679154	0.000766662	0.00085463	0.000926951	0.00103233	0.00112498	0.00125795	0.00138291	0.000653844	0.000828905	0.00114696	0.00149054	0.0018931	0.0023222	0.00281828	0.00339789	0.00410087	0.0049795	0.00610672	0.00866313	0.0120082	0.0165921	0.0234547	0.0335023	0.0458916	0.0651463	0.0741416	0.111113	0.138573	0.159065	0.183999
3	0	0	0	0	0	0.000143932	0.000465008	0.00126391	0.00790314	0.0100981	0.0131705	0.0141763	0.0152587	0.0164239	0.017678	0.019028	0.0204811	0.0220452	0.0237287	0.0278962	0.0322239	0.0372641	0.0424964	0.0479263	0.0535594	0.0594024	0.00242454	0.00989571	0.0109447	0.0120323	0.0131596	0.0143281	0.0155385	0.0167924	0.0180909	0.0194355	0.0208272	0.0222677	0.0237583	0.0253003	0.0268954	0.0285449	0.0302506	0.032014	0.0338367	0.0357093	0.0438864	0.0528932	0.0609308
4	0	0	0	0	0	0.000496004	0.00170591	0.0058896	0.00637024	0.0068619	0.00724241	0.00791696	0.00864158	0.00944507	0.0103388	0.0113362	0.0124539	0.0137122	0.0151355	0.0182756	0.0215284	0.0236569	0.0260888	0.0289131	0.0322566	0.0363066	0.014791	0.0112221	0.0114658	0.0117637	0.0121256	0.0125638	0.0130936	0.0137337	0.0145079	0.0155403	0.0167447	0.018159	0.0198582	0.0217164	0.0254891	0.0281241	0.0315699	0.0345298	0.0377574	0.0413889	0.0454341	0.0481379	0.0561625
5	0	0	0	0	0	0	1.00194e-05	2.00389e-05	4.00776e-05	8.01551e-05	0.000160311	0.000171313	0.000183071	0.000195636	0.000209064	0.000223413	0.000238746	0.000255131	0.000272645	0.000277477	0.000282374	0.000312823	0.000343271	0.000373722	0.00040417	0.000466244	0.000123755	0.000161779	0.000175712	0.000190992	0.000207626	0.00022593	0.000246276	0.000268695	0.000293664	0.000321637	0.00035317	0.00038898	0.000481537	0.000591365	0.000750963	0.000911602	0.00107346	0.00123676	0.00140199	0.00155968	0.0019374	0.00234747	0.00295906
6	0	0	0	0	3.02216e-05	0.000276146	0.000953092	0.00336032	0.00371381	0.00409499	0.00439141	0.00459571	0.00480614	0.00502237	0.00524412	0.00547068	0.00570124	0.00593469	0.00616945	0.00664177	0.00706848	0.00750358	0.00787425	0.00817551	0.00838884	0.0119985	0.00809394	0.00694597	0.00731936	0.00770698	0.00810949	0.00852791	0.0089631	0.00941617	0.0098882	0.0103807	0.0108952	0.0114334	0.0105619	0.0100137	0.0110617	0.0120126	0.0130484	0.0139801	0.0144786	0.0157995	0.0176873	0.0188001	0.0243747
7	0	0	0	1.28222e-05	0.000274207	0.00128902	0.00684597	0.0088115	0.00791534	0.00961274	0.0123703	0.0126901	0.0129904	0.0122519	0.011545	0.0108607	0.0102277	0.0103665	0.0107565	0.0113241	0.0118105	0.0104105	0.00940057	0.00955175	0.00822102	0.0077674	0.00992857	0.00784431	0.00788191	0.00802893	0.00817651	0.00832478	0.00847392	0.00862413	0.00877555	0.00892843	0.00908313	0.00924001	0.0095086	0.00986719	0.011013	0.0121514	0.0132842	0.0142154	0.0154038	0.0166095	0.0181986	0.019801	0.0212184
8	0	0	0	0	0	3.22779e-05	0.000136709	0.000578816	0.000828791	0.00118963	0.00171373	0.00201177	0.00237452	0.00281916	0.00336769	0.00404857	0.00489906	0.00596774	0.00731822	0.00838795	0.00950569	0.0105062	0.0115689	0.0130563	0.0147027	0.0164179	0.0192799	0.022721	0.0228527	0.0229455	0.0230537	0.0231778	0.0233186	0.0234766	0.0236529	0.0238494	0.0240669	0.0243083	0.0245757	0.0248831	0.0252234	0.0256027	0.0260284	0.02651	0.0271041	0.0277893	0.0285974	0.0295983	0.0309755
9	0	0	0	0	0	3.92752e-05	0.000180984	0.000841934	0.00135544	0.00220669	0.00362628	0.00387567	0.0041622	0.00449465	0.00488399	0.00534458	0.00589528	0.0065616	0.00737942	0.00797341	0.0085678	0.00912183	0.00967485	0.0104906	0.0113065	0.0121829	0.0133015	0.0144201	0.0146101	0.01477	0.0149367	0.0151108	0.015293	0.0154844	0.0156862	0.0158997	0.0161276	0.0163705	0.0171853	0.0174707	0.0187477	0.020034	0.0213462	0.0227186	0.0241301	0.0255984	0.0271471	0.0288157	0.0306501
10	0	0	0	0	0	0	0	0	0	0	0	0	0	0	0	0	0	0	0	0	0	0	0	0	0	8.70019e-08	0.000909592	0.00259863	0.0050989	0.00500172	0.00490447	0.00480722	0.00470991	0.00461257	0.0045152	0.00441778	0.00432031	0.00422281	0.00412528	0.0040277	0.00393008	0.00383243	0.00451198	0.00556375	0.00738098	0.0146102	0.0179373	0.0250235	0.0335755
11	0	0	0	2.59603e-05	0.00052944	0.000823746	0.00186077	0.00517322	0.0125058	0.0274999	0.0739402	0.0783322	0.078028	0.0716313	0.0644771	0.0524029	0.0421514	0.0464594	0.0533066	0.063201	0.0720081	0.0920605	0.127559	0.163857	0.105589	0.132771	0.156148	0.167273	0.17178	0.175055	0.178449	0.181828	0.191326	0.194049	0.196589	0.199345	0.201593	0.205307	0.208565	0.217008	0.222909	0.233314	0.245316	0.247354	0.254243	0.259401	0.263396	0.273059	0.278134
12	0	0	0	5.46845e-06	2.73423e-05	0.000513839	0.00256561	0.0103843	0.0201924	0.0328424	0.0490272	0.0512848	0.0524294	0.0501585	0.048313	0.0464219	0.0445696	0.0467658	0.0487919	0.0533706	0.0575829	0.0630543	0.0842283	0.0975651	0.0818331	0.0984648	0.111572	0.116321	0.124765	0.130629	0.136706	0.143012	0.14956	0.15637	0.163456	0.170833	0.17852	0.186537	0.194929	0.203721	0.219458	0.234522	0.249565	0.270185	0.289785	0.316262	0.341746	0.35963	0.381315
13	0	0	0	0.00112564	0.00337693	0.0213871	0.0350442	0.0476946	0.0916314	0.130483	0.161536	0.173326	0.184797	0.169935	0.155262	0.140786	0.126494	0.137275	0.147571	0.160366	0.172487	0.123986	0.143132	0.160945	0.126356	0.131884	0.16219	0.163902	0.164835	0.166196	0.16753	0.168834	0.170103	0.171332	0.172517	0.17365	0.174724	0.175731	0.176661	0.177503	0.182315	0.186538	0.190712	0.194803	0.198771	0.200112	0.200852	0.201198	0.201029
14	0	0	0	0	0	0.000345802	0.00193296	0.00512353	0.00567941	0.00620637	0.00661121	0.00725632	0.00791565	0.00859158	0.00928647	0.00963735	0.0100292	0.0108153	0.0116333	0.0124866	0.0133422	0.0200442	0.0301019	0.0301184	0.030105	0.0400586	0.0498462	0.0658826	0.0724358	0.0794374	0.0871306	0.095585	0.104878	0.111209	0.117909	0.124995	0.132486	0.1404	0.148758	0.15907	0.170325	0.183979	0.193787	0.215942	0.238346	0.27189	0.310462	0.364427	0.433445
15	0	0	0	0	1.98803e-05	0.000104124	0.00036621	0.00127773	0.00145484	0.00164312	0.00183331	0.0019544	0.00208319	0.00222008	0.00236559	0.0025202	0.00268449	0.00285894	0.00304418	0.00315176	0.00325746	0.00346801	0.0036977	0.0039229	0.00415011	0.00440877	0.00499707	0.00553735	0.00592236	0.00628906	0.00668728	0.00712171	0.00759803	0.00812313	0.00870548	0.00935534	0.0100855	0.0109117	0.0118532	0.0129341	0.0141839	0.01564	0.0173476	0.0193642	0.0217602	0.0246243	0.0280668	0.0322244	0.0372686
16	0	0	0	0	4.49185e-06	7.61714e-05	0.000129137	0.000291603	0.000324978	0.00104092	0.00118258	0.00131253	0.00144315	0.00157424	0.00170585	0.00172243	0.00173942	0.00187226	0.00200533	0.00213282	0.00225854	0.00336981	0.00492935	0.00523218	0.00501469	0.00638897	0.00788257	0.00888026	0.00959438	0.0106842	0.0117769	0.0128738	0.0140087	0.0151245	0.0162469	0.0173782	0.0185218	0.0196777	0.0208077	0.0221075	0.0235452	0.0276943	0.0299273	0.0342285	0.0370349	0.0424948	0.0487078	0.054592	0.0677185
17	0	0	1.92834e-05	8.63991e-05	0.00052176	0.00268317	0.0144472	0.0166334	0.0140463	0.0153122	0.0175627	0.0197408	0.0225915	0.0262643	0.0233614	0.0209897	0.01911	0.0179298	0.0170122	0.0189194	0.0155624	0.0154137	0.0150586	0.0117698	0.0110246	0.0114165	0.0135509	0.0127204	0.0130045	0.0131507	0.0132991	0.0134498	0.0136029	0.0137583	0.0139161	0.0140764	0.014239	0.0144042	0.0195608	0.019756	0.0204987	0.0212041	0.0219064	0.0226046	0.0234457	0.0261198	0.0287506	0.0303763	0.0319795
18	0	0	0	0.00455332	0.00815818	0.0146171	0.0261897	0.0469247	0.0840748	0.150637	0.269892	0.257627	0.24536	0.233196	0.221214	0.209485	0.198059	0.186979	0.176279	0.165979	0.156093	0.146633	0.137603	0.129004	0.12083	0.113077	0.105736	0.117484	0.126326	0.135833	0.146056	0.157048	0.168868	0.181579	0.195244	0.209939	0.225739	0.242731	0.261	0.280646	0.301769	0.324481	0.348904	0.35393	0.359028	0.364387	0.369773	0.37515	0.38053
19	0	0	0	0	0	0.000300094	0.00112536	0.00422008	0.00489597	0.00555847	0.00606556	0.0079104	0.0103196	0.0134646	0.0175702	0.0229267	0.0299087	0.0389939	0.0507955	0.0554839	0.0596854	0.0691001	0.0885036	0.063413	0.0701643	0.0752879	0.0870638	0.0982929	0.106737	0.112189	0.117867	0.123772	0.129903	0.136256	0.142826	0.149604	0.156574	0.163719	0.171012	0.178419	0.176955	0.173363	0.169537	0.166403	0.162899	0.158344	0.153639	0.148376	0.143785
20	0	0	6.37241e-07	2.83127e-05	0.000115337	0.000431447	0.00123868	0.00276579	0.00570841	0.0112767	0.0223687	0.020275	0.0174255	0.00920505	0.0127264	0.0160278	0.0219008	0.0186142	0.0150032	0.0184532	0.0176651	0.0434856	0.050774	0.0406052	0.0369898	0.0481409	0.0525769	0.0550527	0.0574895	0.0601833	0.0614293	0.0620509	0.0631526	0.063876	0.0647541	0.0665137	0.0686099	0.0705825	0.0737064	0.0760528	0.0771739	0.0776375	0.0780965	0.0784012	0.0783082	0.0787007	0.0808991	0.0831925	0.0860254
21	0	0	0	0	0	4.53129e-05	0.000210905	0.000869753	0.000987678	0.00187872	0.00317809	0.00345114	0.0037306	0.00401811	0.00431563	0.00462591	0.00495285	0.0053023	0.00568281	0.00598456	0.00628413	0.00771591	0.00914468	0.00969278	0.0111824	0.0126654	0.0148707	0.0173018	0.0178951	0.0185184	0.019143	0.0197687	0.020396	0.0210248	0.0216555	0.0222884	0.0229235	0.0235615	0.0248602	0.026161	0.0283151	0.0307494	0.0333432	0.0376174	0.0418643	0.0479808	0.0578939	0.0678293	0.0818184
22	0	0	0	8.41688e-06	3.66536e-05	6.73211e-05	0.000262276	0.00112401	0.00173228	0.00250467	0.00340746	0.00363043	0.00387629	0.00414798	0.00444887	0.00478268	0.00515361	0.00556642	0.00602642	0.00653945	0.00711207	0.00801237	0.00904503	0.0102278	0.0129994	0.0156041	0.0171508	0.0190094	0.0194742	0.0199513	0.0204409	0.0209433	0.0214588	0.0227347	0.0240547	0.02542	0.0268317	0.0282911	0.0283945	0.0284399	0.0284193	0.0283386	0.0282031	0.0336081	0.0384166	0.0426875	0.0464598	0.0549358	0.0634026
23	0	0	0	0	0	0	0.000105378	0.000474201	0.000661181	0.000903043	0.00118842	0.00194844	0.00268109	0.00413708	0.00553379	0.00813262	0.0106097	0.0149533	0.0182762	0.0227859	0.0227859	0.0235455	0.0190328	0.0208538	0.0253794	0.0318329	0.0413074	0.0600168	0.0646098	0.0640225	0.0634241	0.0628143	0.0621924	0.0611331	0.0600695	0.0590012	0.0579273	0.0568476	0.0577675	0.0586299	0.0594324	0.0601721	0.0608459	0.0621493	0.0633578	0.0668005	0.0715021	0.0784558	0.0865923
24	0	0	0	0	0	0	0	8.30714e-07	1.54141e-06	7.96025e-06	1.02858e-05	1.11547e-05	1.21095e-05	1.31407e-05	1.42425e-05	1.54476e-05	1.67362e-05	1.81285e-05	1.96351e-05	2.12703e-05	2.30523e-05	2.50092e-05	2.72825e-05	3.06748e-05	3.48251e-05	3.99832e-05	4.6453e-05	5.45293e-05	5.74448e-05	6.05936e-05	6.40115e-05	6.77418e-05	7.18375e-05	7.63627e-05	8.13961e-05	8.70332e-05	0.000102294	0.000118988	0.000134715	0.000148542	0.000172991	0.000227156	0.000396376	0.000781857	0.00137281	0.00268686	0.00333039	0.00531368	0.00809028
25	0	0	0	0.000985863	0.00149217	0.00254993	0.00523243	0.013722	0.0192795	0.0266078	0.0417739	0.0432174	0.0445513	0.0445233	0.0444199	0.0442572	0.0440487	0.0445554	0.0449294	0.046174	0.0472438	0.0474908	0.047714	0.0420549	0.0449968	0.0461759	0.0573229	0.0652014	0.0674983	0.0698119	0.0722456	0.0748046	0.0774935	0.0803161	0.0832748	0.0863718	0.0896076	0.0929816	0.0964933	0.10156	0.10468	0.112133	0.114227	0.115237	0.116293	0.119297	0.119811	0.12371	0.132574
26	0	0	0	0	0	7.65432e-06	3.22933e-05	0.000137513	0.000199214	0.000291211	0.000429412	0.00051238	0.000613332	0.000736663	0.000887965	0.00107437	0.00130503	0.00159169	0.00194955	0.00240281	0.00285673	0.00374533	0.00463505	0.00552591	0.00651155	0.00615118	0.0069711	0.00779084	0.00654787	0.00665921	0.00677527	0.00689664	0.00702395	0.00715783	0.00729927	0.00744915	0.00760866	0.00777941	0.00872943	0.00896304	0.00921803	0.00961453	0.0100574	0.0105554	0.0110313	0.0115755	0.0122097	0.0129688	0.0139126
27	0	0	0	0	0	0	0	0	0	0	0	0	0	0	0	0	0	0	0	0	0	0	0	0	0	0	0	0	0	0	0	0	0	0	0	0	0	0	0	0	0	0	0	0	0	0	0	0	0
Total	0	0	8.18373e-07	0.000138466	0.00030115	0.000795123	0.00214537	0.00370339	0.00555727	0.00893433	0.0151042	0.0150844	0.0148937	0.0138785	0.0135899	0.0131836	0.0131003	0.0129875	0.012984	0.0138619	0.0141324	0.0168461	0.0191151	0.0194752	0.0173766	0.0199932	0.0209101	0.0225876	0.0235196	0.0244924	0.0253834	0.0262579	0.0273886	0.0283299	0.0293274	0.0304646	0.0316785	0.0330765	0.0348198	0.0366111	0.0387601	0.0416632	0.0445269	0.0477033	0.0500894	0.0551861	0.0600396	0.0647091	0.0716899
Cropland per capita (ha/cap)
region	-10000	-9000	-8000	-7000	-6000	-5000	-4000	-3000	-2000	-1000	0	100	200	300	400	500	600	700	800	900	1000	1100	1200	1300	1400	1500	1600	1700	1710	1720	1730	1740	1750	1760	1770	1780	1790	1800	1810	1820	1830	1840	1850	1860	1870	1880	1890	1900	1910
1	0	0	0	0	0	0	0	0	0	0	0	0	0	0	0	0	0	0	0	0	0	0	0	0	0	0	0	0.102516	0.116822	0.130238	0.144923	0.16098	0.178533	0.197715	0.21868	0.319004	0.364851	0.449071	0.517483	0.593168	0.681602	0.786309	0.908327	1.04208	1.26094	1.34196	1.49735	1.52251	2.00118
2	0	0	0	0	0	0	0	0	0.0525931	0.352264	0.633344	0.633348	0.63334	0.63334	0.633339	0.633332	0.63332	0.633301	0.63326	0.635365	0.637339	0.641688	0.645111	0.649842	0.656662	0.665338	0.762504	0.811734	0.75852	0.744142	0.759067	0.777978	0.810813	0.856569	0.919935	1.00623	1.12261	1.24575	1.33351	1.42133	1.53877	1.68843	1.7513	1.85477	1.72765	1.99439	1.99293	1.89482	1.82364
3	0	0	0	0	0	0.01138	0.0294128	0.0639561	0.31993	0.32703	0.341222	0.348171	0.35526	0.36249	0.369871	0.377402	0.385086	0.392929	0.400929	0.409093	0.417426	0.425927	0.434601	0.443453	0.452481	0.461698	0.47111	0.480706	0.4905	0.500493	0.510689	0.521095	0.531709	0.542545	0.553599	0.564883	0.576388	0.588137	0.600123	0.612352	0.624831	0.637567	0.650561	0.66382	0.67735	0.690945	0.71967	0.754862	0.780964
4	0	0	0	0	0	0.164052	0.493181	1.47407	1.36287	1.23419	1.07176	1.05714	1.03921	1.02075	1.0017	0.981976	0.961522	0.94023	0.917929	0.895728	0.871055	0.843135	0.812089	0.776552	0.73456	0.683539	0.593091	0.503074	0.492875	0.48245	0.471845	0.461115	0.450336	0.439587	0.428953	0.418983	0.409118	0.399424	0.389068	0.383619	0.38918	0.382141	0.37906	0.37612	0.369798	0.363778	0.357857	0.338397	0.331548
5	0	0	0	0	0	0	0.00398716	0.00607575	0.00925826	0.0141079	0.0214978	0.0214415	0.0213857	0.02133	0.0212742	0.0212189	0.0211634	0.0211082	0.0210533	0.0210413	0.0210296	0.0210157	0.0210043	0.0209948	0.0209866	0.0210078	0.117695	0.247773	0.233934	0.219896	0.205642	0.191474	0.177641	0.164083	0.151036	0.138616	0.12692	0.116019	0.112169	0.112167	0.112164	0.112163	0.112161	0.112161	0.112161	0.112162	0.112161	0.112161	0.112159
6	0	0	0	0	0.02164	0.167685	0.48947	1.45577	1.35374	1.23362	1.08142	1.06291	1.04431	1.02507	1.00532	0.984839	0.963672	0.941615	0.918558	0.894641	0.869023	0.840597	0.810374	0.777587	0.74158	0.990725	1.35352	1.19242	1.23457	1.27726	1.32055	1.36453	1.40927	1.45483	1.50131	1.54882	1.59747	1.64739	1.49226	1.31773	1.233	1.17143	1.09359	0.996351	0.92755	0.866347	0.781625	0.714386	0.773888
7	0	0	0	0.037553	0.514037	1.54211	4.62629	2.62394	1.52079	1.25319	0.907295	0.879445	0.852707	0.837155	0.821924	0.819545	0.820244	0.78073	0.749635	0.712051	0.676504	0.659084	0.635259	0.592549	0.580321	0.562823	0.54284	0.507261	0.508482	0.514002	0.519441	0.524793	0.530071	0.535274	0.540412	0.545489	0.550517	0.555489	0.540164	0.529379	0.526036	0.522916	0.519993	0.542609	0.530717	0.51855	0.479895	0.461146	0.448475
8	0	0	0	0	0	0.0706807	0.211486	0.629159	0.629502	0.627821	0.624804	0.621913	0.618974	0.616093	0.613281	0.610547	0.607933	0.605468	0.603163	0.60291	0.602809	0.600843	0.599286	0.599771	0.598688	0.598356	0.603427	0.609218	0.610242	0.611213	0.612123	0.612965	0.613753	0.614495	0.615167	0.615812	0.616402	0.616963	0.617478	0.61792	0.618335	0.618735	0.61911	0.619463	0.619518	0.619487	0.61936	0.619214	0.619707
9	0	0	0	0	0	0.0656957	0.203039	0.624812	0.656904	0.690051	0.7238	0.713097	0.701302	0.688502	0.674704	0.659902	0.644307	0.62786	0.610636	0.609893	0.609265	0.598815	0.589781	0.587087	0.584793	0.581725	0.580755	0.579912	0.579048	0.578318	0.577585	0.57685	0.576093	0.57533	0.574542	0.573726	0.572798	0.571856	0.589962	0.58884	0.580789	0.573514	0.567166	0.55887	0.554543	0.550403	0.547494	0.544894	0.542729
10	0	0	0	0	0	0	0	0	0	0	0	0	0	0	0	0	0	0	0	0	0	0	0	0	0	2.05523e-05	0.184178	0.368338	0.736644	0.736778	0.736916	0.737056	0.737195	0.737328	0.737463	0.737598	0.737726	0.73786	0.737989	0.738114	0.738244	0.738367	0.738522	0.738687	0.738857	0.739059	0.739209	0.739363	0.73952
11	0	0	0	0.0457699	0.646033	0.663246	0.78723	1.13277	1.08844	1.14621	1.05886	1.07732	1.03497	1.00696	0.963905	0.920282	0.90495	0.905201	0.937135	0.993883	1.01749	1.0706	1.09338	0.964048	0.940302	0.901324	0.807305	0.762859	0.735253	0.719366	0.704013	0.689931	0.699247	0.683765	0.668698	0.652838	0.63426	0.623181	0.605498	0.586826	0.554293	0.536364	0.534479	0.509609	0.4949	0.468382	0.444448	0.425637	0.39717
12	0	0	0	0.0075723	0.0185258	0.214532	0.651944	1.58731	1.59649	1.52857	1.2928	1.29521	1.26888	1.22354	1.18771	1.19419	1.20206	1.18124	1.1586	1.1344	1.10754	1.07269	1.00849	0.997575	0.9585	0.939522	0.858206	0.811902	0.817747	0.814161	0.810525	0.806833	0.803062	0.799141	0.795119	0.790946	0.786611	0.782073	0.777173	0.770853	0.761534	0.748973	0.738621	0.727247	0.713445	0.698252	0.683014	0.667272	0.650615
13	0	0	0	0.654761	1.30952	2.61903	2.54805	2.46602	2.36888	2.24886	2.08803	2.0681	2.04747	2.02764	2.00694	1.98526	1.9621	1.93574	1.90752	1.87736	1.84518	1.81433	1.77614	1.73367	1.68962	1.63657	1.57236	1.4955	1.48664	1.4775	1.46809	1.45838	1.44835	1.43798	1.42724	1.41608	1.40448	1.3924	1.37977	1.36655	1.35248	1.33768	1.32203	1.30538	1.28757	1.26845	1.24767	1.22483	1.19932
14	0	0	0	0	0	0.101049	0.484151	1.09997	1.04512	0.978936	0.89382	0.908489	0.919384	0.927185	0.932434	0.913837	0.897505	0.90176	0.904566	0.906188	0.907766	0.909169	0.910242	0.910741	0.910336	0.90849	0.904367	0.896491	0.90612	0.935884	0.966676	0.998531	1.03148	1.02962	1.02749	1.02511	1.02244	1.01945	1.01614	1.01136	1.00614	0.999708	0.99547	0.985724	0.977061	0.966423	0.956524	0.946208	0.936653
15	0	0	0	0	0.0147191	0.0660787	0.199201	0.595739	0.581412	0.562847	0.538284	0.535578	0.532814	0.529972	0.527061	0.524073	0.521024	0.51789	0.514683	0.514959	0.514921	0.520282	0.525927	0.514314	0.501183	0.489825	0.485787	0.479565	0.494933	0.509425	0.524573	0.540531	0.557491	0.5757	0.59545	0.617074	0.641	0.667737	0.697875	0.732138	0.771371	0.816619	0.869075	0.930199	1.0017	1.03515	1.09173	1.1176	1.16388
16	0	0	0	0	0.0127435	0.185227	0.269163	0.520959	0.497629	1.36614	1.33021	1.3232	1.31689	1.31068	1.30413	1.29886	1.28982	1.2733	1.24806	1.24178	1.23529	1.22875	1.22072	1.21399	1.20605	1.19774	1.18906	1.17678	1.18381	1.18411	1.18414	1.184	1.18658	1.18678	1.18688	1.18708	1.18748	1.18804	1.18652	1.18034	1.17486	1.17633	1.17323	1.17415	1.17193	1.17384	1.17588	1.17657	1.18332
17	0	0	0.0321391	0.103268	0.364716	1.13774	3.56453	2.74762	1.5824	1.2271	0.910332	0.895446	0.885078	0.878583	0.812529	0.744169	0.676071	0.648698	0.623893	0.669786	0.619705	0.617743	0.596946	0.532136	0.526799	0.513983	0.515289	0.515988	0.517602	0.516305	0.514968	0.513586	0.512162	0.510682	0.509147	0.507555	0.505899	0.504173	0.672568	0.666834	0.663052	0.65851	0.653777	0.648818	0.644829	0.647879	0.650238	0.642572	0.635455
18	0	0	0	2.21884	2.01715	1.83379	1.66712	1.51559	1.37781	1.25256	1.13867	1.03517	0.941061	0.855517	0.777749	0.707046	0.642772	0.584337	0.531221	0.482936	0.439032	0.39912	0.362837	0.329855	0.299866	0.272607	0.247826	0.225296	0.236987	0.249401	0.262584	0.276583	0.291452	0.307244	0.324013	0.341826	0.360745	0.380848	0.4022	0.433176	0.442061	0.484295	0.475859	0.458972	0.443758	0.448279	0.418419	0.417233	0.455997
19	0	0	0	0	0	0.107835	0.323505	0.970512	0.900761	0.818119	0.714202	0.701926	0.689191	0.675924	0.662153	0.647812	0.632837	0.617081	0.600479	0.583024	0.564457	0.544577	0.523123	0.499758	0.47397	0.445008	0.41169	0.37183	0.36734	0.36265	0.357838	0.35289	0.347799	0.342555	0.337143	0.331551	0.325761	0.319758	0.313516	0.307013	0.300378	0.293411	0.286088	0.278287	0.27001	0.261219	0.251818	0.241613	0.230226
20	0	0	0.00107626	0.0290181	0.0715786	0.161839	0.280431	0.377471	0.469202	0.91701	0.417181	0.42586	0.435202	0.448612	0.453896	0.462221	0.470754	0.480481	0.490436	0.499968	0.514615	0.517993	0.528885	0.545793	0.558931	0.569207	0.578937	0.593191	0.59163	0.540139	0.518732	0.46616	0.381239	0.349213	0.317123	0.260533	0.248097	0.260971	0.232953	0.233001	0.214836	0.204324	0.196773	0.200868	0.23605	0.234409	0.233575	0.225283	0.220057
21	0	0	0	0	0	0.0395621	0.128226	0.384074	0.32335	0.319113	0.31359	0.312936	0.312148	0.311262	0.310286	0.309233	0.308104	0.306914	0.30568	0.304019	0.302429	0.303677	0.304393	0.299678	0.300863	0.301653	0.300852	0.301149	0.3004	0.299671	0.298991	0.298357	0.297765	0.297213	0.296696	0.296215	0.295766	0.29535	0.295514	0.295677	0.295444	0.295926	0.296686	0.298874	0.300388	0.302383	0.325045	0.342547	0.363706
22	0	0	0	0.0264526	0.0844341	0.112729	0.316632	0.970512	0.417395	0.341846	0.316081	0.312245	0.310598	0.310938	0.313122	0.317064	0.322715	0.330064	0.339117	0.349901	0.36246	0.371464	0.384313	0.40075	0.412697	0.41608	0.418805	0.418035	0.42411	0.430333	0.436695	0.443214	0.449879	0.456511	0.46345	0.470688	0.478205	0.485999	0.464389	0.443463	0.423378	0.404112	0.38564	0.367438	0.35005	0.333421	0.317534	0.333752	0.321894
23	0	0	0	0	0	0	0.0749203	0.22476	0.208923	0.190232	0.166899	0.164181	0.161369	0.158455	0.155431	0.152284	0.149001	0.140001	0.14	0.150001	0.16	0.16	0.125294	0.120356	0.114975	0.109037	0.102373	0.0947035	0.0938653	0.0930122	0.0921427	0.0912568	0.0903533	0.0894312	0.0884899	0.087528	0.0865445	0.0855382	0.0845076	0.0834511	0.0823674	0.0812542	0.0801099	0.0789315	0.077717	0.0764636	0.0751671	0.0738247	0.0724316
24	0	0	0	0	0	0	0	0.00266493	0.00493597	0.0244981	0.0311823	0.0336097	0.03624	0.0390318	0.0419537	0.0450853	0.0483465	0.0517705	0.0553566	0.0591034	0.0630096	0.067082	0.0680428	0.0735983	0.0809166	0.0765261	0.074927	0.0759727	0.0807278	0.0842693	0.0880127	0.091985	0.0962198	0.100753	0.105629	0.110895	0.127626	0.144895	0.165152	0.173859	0.184482	0.208422	0.265409	0.329819	0.429869	0.677767	0.628898	0.842193	1.09349
25	0	0	0	0.37539	0.403218	0.479832	0.589443	0.998868	0.931322	0.855697	0.814608	0.777343	0.74348	0.702322	0.66419	0.628874	0.596167	0.560715	0.528232	0.498159	0.470915	0.45216	0.434796	0.396536	0.381774	0.36832	0.354663	0.334073	0.339301	0.34431	0.349587	0.355129	0.360939	0.367005	0.37332	0.379867	0.386624	0.393569	0.400679	0.411216	0.410449	0.423609	0.415175	0.404446	0.392761	0.389002	0.368727	0.359325	0.362879
26	0	0	0	0	0	0.0604593	0.180323	0.535013	0.531493	0.523491	0.510182	0.519106	0.527569	0.535578	0.543129	0.550226	0.556882	0.563102	0.568907	0.571114	0.572502	0.573101	0.573417	0.573579	0.574325	0.569347	0.564727	0.560635	0.546278	0.545018	0.543814	0.542665	0.541588	0.540572	0.539621	0.538753	0.537961	0.537263	0.588321	0.588824	0.589428	0.585269	0.58109	0.576924	0.575861	0.575089	0.574713	0.574879	0.575838
27	0	0	0	0	0	0	0	0	0	0	0	0	0	0	0	0	0	0	0	0	0	0	0	0	0	0	0	0	0	0	0	0	0	0	0	0	0	0	0	0	0	0	0	0	0	0	0	0	0
Total	0	0	0.00147304	0.188473	0.297388	0.543412	0.972003	1.08528	0.998127	1.05486	0.848308	0.830098	0.806978	0.795135	0.733508	0.678704	0.629099	0.608647	0.592449	0.581142	0.569688	0.551913	0.560315	0.556314	0.511966	0.517935	0.528545	0.497645	0.500034	0.49679	0.497808	0.492286	0.478833	0.473553	0.466917	0.445715	0.443309	0.457055	0.446492	0.453351	0.445288	0.454769	0.456869	0.468439	0.492131	0.512016	0.514031	0.513768	0.529535
in km2	-10000	-9000	-8000	-7000	-6000	-5000	-4000	-3000	-2000	-1000	0	100	200	300	400	500	600	700	800	900	1000	1100	1200	1300	1400	1500	1600	1700	1710	1720	1730	1740	1750	1760	1770	1780	1790	1800	1810	1820	1830	1840	1850	1860	1870	1880	1890	1900	1910
North America	0	0	0	0	0	0	0	0	285.859	2127.38	4249.82	4452.2	4664.19	4886.32	5118.99	5362.75	5618.11	5885.64	6165.9	6960.37	7759.02	8415.6	9372.36	10213.5	11420.7	12555.1	5936.12	7730.49	10678.6	13876.5	17633.7	21663	26341	31830.7	38510.3	47410.5	58420.9	82994.6	114959	158793	224197	319791	438420	626856	722198	1.06966e+06	1.33444e+06	1.52802e+06	1.81536e+06
Latin America	0	0	0	0	277.573	3180.58	10995.9	37817.7	54487.5	62953.3	72602.2	77021.6	81689.7	86636.4	91880.4	97438.8	103331	109577	116199	130984	145745	161356	176972	192623	208243	256251	90968.4	92639.4	98404	104425	110719	117309	124219	131477	139116	147246	155828	164912	161834	162089	178935	194167	210895	226433	238321	258092	297482	330654	408534
Europe	0	0	0	101.424	1955.86	3673.49	10177.3	32643.4	72344.4	143621	333621	352562	352991	326764	298361	252061	212420	230975	258507	300500	338061	418072	575082	724506	492234	613016	715296	761976	789610	809324	829759	850442	893634	912612	931298	951155	969587	993775	1.01681e+06	1059178	1.10162e+06	1.15949e+06	1.22312e+06	1.25809e+06	1.30928e+06	1.36339e+06	1.41196e+06	1.47091e+06	1.51831e+06
USSR	0	0	0	0	151.502	1948.22	5151.03	14010.2	15708.5	28700.8	32114.2	35263.4	38465.4	41720.4	45033.2	46197.6	47440.2	50961	54553.8	57781.8	60974.9	85675.7	120622	126514	123794	155707	190736	222540	241237	266438	292380	319157	347419	373113	399441	426497	454404	483235	512452	546628	584519	669972	721583	818740	892887	1.02187e+06	1169686	1.32755e+06	1.62089e+06
N.Africa_M.East	0	0	99.7536	1397.08	6967.3	38220	143089	176031	191335	238224	290534	312869	338318	341350	310702	283090	258475	261566	267149	290353	285313	238508	245446	243158	204473	208059	255603	240099	242519	245214	247904	250587	253260	255921	258567	261194	263799	266378	295389	299210	313674	327446	341129	353514	368090	390215	413956	432272	448958
Tropical Africa	0	0	0	0	0	638.967	2791.18	12264.7	18451.2	28041.3	43067.7	48374	54732.7	62414.8	71765.6	83231.9	97398.1	115031	137147	155302	174007	193580	213860	240504	269482	292060	336787	389038	387731	390225	392959	395948	399205	402750	406605	410804	415381	420379	433382	439730	452371	466301	482117	499682	519563	547789	573629	607639	649712
China	0	0	6.93714	308.218	1255.58	4767.78	13750.6	31106.7	63300.5	124074	244944	222588	192138	103392	142697	179903	245488	211858	175338	214003	206418	489731	573662	457030	419267	541873	592948	622555	651079	681694	696600	704762	718205	727583	738695	759453	783920	807084	842816	870111	881970	886167	890259	892835	890994	894191	917009	940732	970487
South Asia	0	0	0	14407.4	25813.7	46250.7	82868.1	148476	266025	476637	853978	815168	776353	737865	699954	662840	626686	591628	557771	525180	493901	463969	435397	408186	382325	357791	334565	371737	399714	429796	462143	496923	534322	574542	617780	664276	714271	768036	825840	888003	954840	1026704	1103984	1119887	1136015	1152974	1170014	1187029	1204052
SE Asia	0	0	0	1837.68	2839.21	4979.95	10822.5	30251.6	42269.5	59940.4	93426.7	97329.9	101103	102448	103751	105057	106412	109243	112024	116336	120463	126782	133370	127207	143164	155451	185418	210696	217582	224605	231883	239427	247245	257151	267419	278056	289068	300457	310527	323328	334581	354398	364615	390546	415051	446668	482272	535536	608376
Pacific Dev.	0	0	0	0	0	0	44.3971	206.462	290.948	444.42	583.34	910.524	1226.87	1848.59	2445.89	3550.49	4604.48	6445.66	7857.76	9770.9	9785.22	10120.9	8237.98	9032.43	10972.5	13732.8	17776.6	25724	27682.5	27460.4	27235.7	27008.8	26779.6	26369.7	25962.1	25557.3	25227.4	24906.7	25420.6	25895	26429.6	27176.4	28819.8	32466.1	37723.3	49731.4	56882.8	75747.1	101484
Total	0	0	106.691	18051.8	39260.7	103660	279690	482809	724498	1.16476e+06	1.96912e+06	1.96654e+06	1.94168e+06	1.80933e+06	1.77171e+06	1.71873e+06	1.70787e+06	1.69317e+06	1.69271e+06	1.80717e+06	1.84243e+06	2.19621e+06	2.49202e+06	2.53897e+06	2.26538e+06	2.6065e+06	2.72603e+06	2.94473e+06	3.06624e+06	3.19306e+06	3.30922e+06	3.42323e+06	3.57063e+06	3.69335e+06	3.82339e+06	3.97165e+06	4.12991e+06	4.31216e+06	4.53943e+06	4.77296e+06	5.05313e+06	5.43161e+06	5.80494e+06	6.21905e+06	6.53012e+06	7.19458e+06	7.82733e+06	8.43609e+06	9.34617e+06
check	#DIV/0!	#DIV/0!	1	1	1	1	1	1	1	1	1	1	1	1	1	1	1	1	1	1	1	1	1	1	1	1	1	1	1	1	1	1	1	1	1	1	1	1	1	1	1	1	1	1	1	1	1	1	1
in Mha	-10000	-9000	-8000	-7000	-6000	-5000	-4000	-3000	-2000	-1000	0	100	200	300	400	500	600	700	800	900	1000	1100	1200	1300	1400	1500	1600	1700	1710	1720	1730	1740	1750	1760	1770	1780	1790	1800	1810	1820	1830	1840	1850	1860	1870	1880	1890	1900	1910
North America	0	0	0	0	0	0	0	0	0.0285859	0.212738	0.424982	0.44522	0.466419	0.488632	0.511899	0.536275	0.561811	0.588564	0.61659	0.696037	0.775902	0.84156	0.937236	1.02135	1.14207	1.25551	0.593612	0.773049	1.06786	1.38765	1.76337	2.1663	2.6341	3.18307	3.85103	4.74105	5.84209	8.29946	11.4959	15.8793	22.4197	31.9791	43.842	62.6856	72.2198	106.966	133.444	152.802	181.536
Latin America	0	0	0	0	0.0277573	0.318058	1.09959	3.78177	5.44875	6.29533	7.26022	7.70216	8.16897	8.66364	9.18804	9.74388	10.3331	10.9577	11.6199	13.0984	14.5745	16.1356	17.6972	19.2623	20.8243	25.6251	9.09684	9.26394	9.8404	10.4425	11.0719	11.7309	12.4219	13.1477	13.9116	14.7246	15.5828	16.4912	16.1834	16.2089	17.8935	19.4167	21.0895	22.6433	23.8321	25.8092	29.7482	33.0654	40.8534
Europe	0	0	0	0.0101424	0.195586	0.367349	1.01773	3.26434	7.23444	14.3621	33.3621	35.2562	35.2991	32.6764	29.8361	25.2061	21.242	23.0975	25.8507	30.05	33.8061	41.8072	57.5082	72.4506	49.2234	61.3017	71.5296	76.1976	78.961	80.9323	82.9759	85.0442	89.3634	91.2612	93.1299	95.1155	96.9587	99.3775	101.681	105.918	110.162	115.949	122.312	125.809	130.928	136.339	141.196	147.091	151.831
USSR	0	0	0	0	0.0151502	0.194822	0.515103	1.40102	1.57085	2.87008	3.21142	3.52634	3.84654	4.17204	4.50332	4.61976	4.74402	5.0961	5.45538	5.77818	6.09749	8.56757	12.0622	12.6514	12.3794	15.5707	19.0736	22.254	24.1237	26.6438	29.238	31.9157	34.7419	37.3113	39.9441	42.6497	45.4404	48.3235	51.2452	54.6628	58.4519	66.9972	72.1583	81.874	89.2887	102.187	116.969	132.755	162.089
N.Africa_M.East	0	0	0.00997536	0.139708	0.69673	3.822	14.3089	17.6031	19.1335	23.8224	29.0534	31.2869	33.8318	34.135	31.0702	28.309	25.8475	26.1566	26.7149	29.0353	28.5313	23.8508	24.5446	24.3158	20.4473	20.8059	25.5603	24.0099	24.2519	24.5214	24.7904	25.0587	25.326	25.5921	25.8567	26.1194	26.3799	26.6378	29.5389	29.921	31.3674	32.7446	34.1129	35.3514	36.809	39.0215	41.3956	43.2272	44.8958
Tropical Africa	0	0	0	0	0	0.0638967	0.279118	1.22647	1.84512	2.80413	4.30677	4.8374	5.47327	6.24148	7.17656	8.32319	9.73981	11.5031	13.7147	15.5302	17.4007	19.358	21.386	24.0504	26.9482	29.206	33.6787	38.9038	38.7731	39.0225	39.2959	39.5948	39.9205	40.275	40.6605	41.0804	41.5381	42.0379	43.3382	43.973	45.2371	46.6301	48.2117	49.9682	51.9563	54.7789	57.3629	60.7639	64.9712
China	0	0	0.000693714	0.0308218	0.125558	0.476778	1.37506	3.11067	6.33005	12.4074	24.4944	22.2588	19.2138	10.3392	14.2697	17.9903	24.5488	21.1858	17.5338	21.4003	20.6418	48.9731	57.3662	45.703	41.9267	54.1873	59.2948	62.2555	65.1079	68.1694	69.66	70.4762	71.8205	72.7583	73.8695	75.9453	78.392	80.7084	84.2816	87.0111	88.197	88.6167	89.0259	89.2835	89.0994	89.4191	91.7009	94.0732	97.0487
South Asia	0	0	0	1.44074	2.58137	4.62507	8.28681	14.8476	26.6025	47.6637	85.3978	81.5169	77.6353	73.7865	69.9954	66.284	62.6686	59.1628	55.7771	52.5181	49.3901	46.3969	43.5397	40.8186	38.2325	35.7791	33.4565	37.1737	39.9714	42.9796	46.2143	49.6923	53.4322	57.4542	61.778	66.4276	71.4271	76.8036	82.584	88.8003	95.484	102.67	110.398	111.989	113.602	115.297	117.001	118.703	120.405
SE Asia	0	0	0	0.183768	0.283921	0.497995	1.08225	3.02516	4.22695	5.99404	9.34267	9.73299	10.1103	10.2448	10.3751	10.5057	10.6411	10.9243	11.2024	11.6335	12.0463	12.6782	13.337	12.7207	14.3164	15.5451	18.5418	21.0696	21.7582	22.4605	23.1883	23.9427	24.7245	25.7151	26.7419	27.8056	28.9068	30.0457	31.0527	32.3328	33.4581	35.4398	36.4615	39.0546	41.5051	44.6668	48.2272	53.5536	60.8376
Pacific Dev.	0	0	0	0	0	0	0.00443971	0.0206462	0.0290948	0.044442	0.058334	0.0910524	0.122687	0.184859	0.244589	0.355049	0.460448	0.644566	0.785776	0.97709	0.978522	1.01209	0.823798	0.903243	1.09725	1.37328	1.77766	2.5724	2.76825	2.74604	2.72357	2.70088	2.67796	2.63697	2.59621	2.55573	2.52274	2.49067	2.54206	2.5895	2.64296	2.71764	2.88198	3.24661	3.77233	4.97314	5.68828	7.57471	10.1484
Total	0	0	0.0106691	1.80518	3.92607	10.366	27.969	48.2809	72.4498	116.476	196.912	196.654	194.168	180.933	177.171	171.873	170.787	169.317	169.271	180.717	184.243	219.621	249.202	253.897	226.538	260.65	272.603	294.473	306.624	319.306	330.922	342.323	357.063	369.335	382.339	397.165	412.991	431.216	453.943	477.296	505.313	543.161	580.494	621.905	653.012	719.458	782.733	843.609	934.617
[truncated: 25 more columns]

## Sheet: rf_norice
Rain fed other crops than rice (in 1000 km2)
region	-10000	-9000	-8000	-7000	-6000	-5000	-4000	-3000	-2000	-1000	0	100	200	300	400	500	600	700	800	900	1000	1100	1200	1300	1400	1500	1600	1700	1710	1720	1730	1740	1750	1760	1770	1780	1790	1800	1810	1820	1830	1840	1850	1860	1870	1880	1890	1900	1910
1	0	0	0	0	0	0	0	0	0	0	0	0	0	0	0	0	0	0	0	0	0	0	0	0	0	0	0	205.032	265.519	344.206	446.666	580.21	754.431	981.934	1279.28	2202.72	2979.21	4343.76	5906.21	8092.02	11159.5	15500.9	21617.8	35212.1	48854.4	60622.4	76064.1	83575.8	144193
2	0	0	0	0	0	0	0	0	285.859	2127.38	4249.82	4452.2	4664.19	4886.32	5118.99	5362.75	5618.11	5885.64	6124.47	6913.6	7706.88	8359.04	9309.37	10144.8	11344	12470.8	5896.23	7474.9	10350.9	13458.5	17101.6	20985.7	25477.9	30728.4	37099	45064.3	55286.5	78484	105718	144199	203368	291452	400798	572473	650998	983526	1229700	1412600	1618665
3	0	0	0	0	0	279.674	903.552	2455.89	15356.5	19621.6	25057.7	26971.2	29030.7	31247.5	33633.5	36202	38966.5	41942.3	45145.2	53074.3	61307.9	70897.2	80852	91182.7	101900	113017	4605.88	18799.4	20755	22785.4	24893.2	27080.8	29350.1	31703.7	34144.1	36673.9	39295.5	42011.7	44247.1	46582.8	49021.4	51565.7	54219.2	56984.8	59865.6	62843.6	78061.2	94891.8	107856
4	0	0	0	0	0	364.62	1254.04	4329.54	4682.86	5044.28	5324.01	5819.88	6352.56	6943.22	7600.23	8333.41	9155.09	10080.1	11111.1	13412.4	15797.1	17360.9	19147.9	21223.7	23681.4	26658.7	10848.4	8186.88	8361.48	8575.81	8837.05	9154.21	9538.3	10002.9	10564.9	11313.8	12184.5	13199.3	14349	15648.6	18352	20217	22680.2	24775.4	27052.9	29619.1	32462.4	34337.5	39715.4
5	0	0	0	0	0	0	84.5923	169.186	338.37	676.739	1353.48	1446.37	1545.64	1651.73	1765.1	1886.24	2015.69	2154.03	2301.9	2342.69	2384.04	2641.11	2898.18	3155.27	3412.34	3936.43	1044.8	1365.6	1483.16	1612.1	1752.5	1906.96	2078.67	2267.88	2478.6	2714.72	2980.88	3283.06	4063.96	4990.5	6336.52	7688.14	9044.02	10398.8	11740.2	12954	15826.5	18534.7	21679.8
6	0	0	0	0	277.573	2536.29	8753.74	30863.1	34109.8	37261.9	39720.3	41550.1	43449.2	45399.5	47398.7	49440.4	51516.8	53598.2	55708.1	59947.1	63787	67726.5	71083.5	73800.8	75723.5	108820	73424.1	62887.5	66192.4	69627.4	73199.3	76916.8	80788.4	84823.5	89031.8	93425.4	98016.6	102816	93635.3	87449.2	95919.1	103510	111881	119275	122721	133711	149818	158852	207856
7	0	0	0	77.1177	1303.52	6201.51	34174.3	44995.8	39105.8	48814.7	63655.2	64967.4	66145.5	61138.9	56322.5	51624.9	47498.2	47485.2	49195.7	51985.1	54283.3	48227.3	44340.4	44451	39278.6	37703.9	49722.3	39421.4	39829.9	40893.2	41955	43015.5	44076.4	45138.1	46202.1	47270	48343.3	49424.6	50365.1	51867.7	58125.1	64360.1	70580.3	76795	83018.7	89270	95995.6	103570	109379
8	0	0	0	0	0	366.364	1551.68	6569.73	9404.07	13498.2	19445.1	22826.1	26940.3	31982.8	38202	45900.3	55529.1	67618.4	82877.7	94917	107438	118667	130576	147214	165557	184501	216165	253862	255324	256348	257546	258924	260484	262240	264203	266391	268815	271504	274491	277920	281720	285950	290698	296068	302673	310270	319201	330217	345017
9	0	0	0	0	0	229.737	1058.65	4924.81	7928.49	12907.8	21089.9	22544.3	24215.7	26155.6	28428	31116.9	34332.1	38203	42969.7	46417.5	49856.1	53033.9	56161.9	60742.5	65202.2	69656.2	75088.8	79776.8	80764.7	81631.6	82537.1	83485.7	84481	85530.6	86639.5	87816.4	89076.7	90422	94998.3	96506.3	103813	111171	118678	126530	134607	143006	151863	161390	170983
10	0	0	0	0	0	0	0	0	0	0	0	0	0	0	0	0	0	0	0	0	0	0	0	0	0	0.106063	1090.89	3116.59	6154.58	6026.09	5897.47	5768.84	5640.17	5511.44	5382.68	5253.87	5124.99	4996.08	4488.38	3980.61	3472.79	2964.93	3404.56	4297.96	6124.51	14548.7	18216	26465.9	36218.3
11	0	0	0	94.1097	1919.29	2986.19	6745.54	18753.6	45335.4	99691	267669	283517	281786	258688	232854	189314	152336	167865	192605	228423	260252	332769	461165	592554	381666	479969	564430	604669	620850	632561	644705	656788	691055	700759	709800	719624	727605	740903	750226	778333	797228	832449	873459	878348	900824	917025	929011	961478	973718
12	0	0	0	7.31452	36.5726	687.303	3431.72	13889.8	27009	43929.5	65578	68597.7	70128.7	67091.2	64622.7	62093.2	59615.6	62553.2	65263.3	71387.7	76992.1	84306.8	112623	130448	109418	131652	149177	155498	166784	174619	182739	191166	199916	209016	218485	228343	238617	249330	260499	272202	293187	313274	333335	360857	387013	422370	456394	480247	508880
13	0	0	0	867.497	2602.49	16482.4	27007.5	36756.7	70617.6	100560	124490	133575	142415	130963	119655	108499	97485.1	105793	113728	123588	132929	95552.1	110307	124035	97379.1	101639	124994	126313	126975	127968	128940	129889	130811	131702	132558	133375	134145	134864	135333	135734	139214	142237	145222	148142	150967	151756	152077	152093	151191
14	0	0	0	0	0	285.152	1593.93	4224.92	4683.3	5117.83	5451.67	5983.64	6527.32	7084.7	7657.71	7947.05	8270.2	8918.41	9592.91	10296.6	11002.1	16528.7	24822.3	24835.9	24824.9	33032.7	41103.7	54319.4	59721.3	65492.9	71834.8	78804.5	86465.1	91684.4	97206.8	103048	109223	115748	122611	131086	140340	151580	159637	177871	196320	223951	255730	300200	356386
15	0	0	0	0	77.3079	404.906	1424.07	4968.69	5657.4	6389.39	6689.98	7017.61	7478.93	7969.19	8490.2	9043.73	9631.83	10256.2	10904.2	11286	11660.1	12405.2	13221.5	14020	14823.3	15735.1	17820.6	19724.5	20890.4	21979.7	23191.6	24544.2	26059.8	27765.2	29693	31883.5	34386.2	37262.3	38954.7	41188.9	44080.8	47773.7	52445.5	58318.4	65667.2	74835.8	86253.7	100452	116957
16	0	0	0	0	74.1944	1258.16	2133.03	4816.57	5367.84	17193.4	19427.7	21566.3	23715.4	25871.8	28036	28299.4	28568.8	30750.6	32934.8	35028.1	37091	55338.5	80988.5	85886.7	82397.7	104989	129551	145922	157638	175559	193530	211567	230234	248585	267044	285651	304461	323474	341591	362502	385689	453663	489961	560438	606226	695841	797897	894520	1109938
17	0	0	99.7536	437.971	2670.28	13720.2	73484.4	84557.8	71297.3	77696.4	89544.4	100733	115383	134295	119366	107199	97564.5	91171.2	86149.8	96085.6	78974.6	78337.4	76683.1	59993.8	56172.5	58091.7	68675.1	64222.6	65499.3	66208.7	66930.1	67663.8	68410.2	69169.1	69940.7	70725.6	71523.6	72335.3	98248.4	98844.7	102229	105296	108318	111319	115059	128280	141279	149077	147275
18	0	0	0	14331.9	25669.9	45977.1	82176.8	147210	263705	472385	846186	807427	768648	729880	691693	654306	617881	582554	548430	515575	484032	453840	425011	397544	371430	346644	323168	357890	385515	415244	447240	481669	518716	558583	601471	647618	697261	750676	796682	845147	896732	953638	1012183	1007925	1001138	994171	977633	979447	986286
19	0	0	0	0	0	27.8019	217.115	942.512	1095.59	1245.14	1357.73	1768.03	2304.71	3006.14	3920.2	5111.52	6662.54	8677.95	11291.8	12321	13237.4	15302.4	19563.3	13985.4	15429.7	16493.8	18974.2	21254.1	23053.9	24199.3	25390.1	26622.7	27901	29217.6	30575.2	31971.5	33395.3	34848.3	36312.5	37777.4	37298.5	36411.9	35420	34529.2	33526.6	32302.4	31018.1	29629.6	24333.3
20	0	0	0.741876	293.226	1219.34	4608.53	13126.9	29310	60530.9	119584	231285	209800	179766	90451.2	128565	164297	227860	192170	152869	188726	179907	455231	532197	425835	388115	505498	552560	578977	604309	630669	642585	646247	651550	655775	660881	669661	688046	710504	734628	757435	762424	762606	763498	766398	759269	756499	773296	790914	802934
21	0	0	0	0	0	79.6958	455.321	2037.95	2081.55	3772.66	5657.03	6186.52	6725.47	7277.79	7847.78	8441.99	9069.71	9745.2	10489.8	11068	11640.2	14367.3	17092.4	17736.4	20886.4	24024.3	29666	34924.5	36228.3	37568.8	38907.2	40249	41590.3	42938	44285.9	45634.4	46993.5	48356.8	50610.9	52826.4	56361.2	59921.8	63868	71577.3	79213.3	90798.3	109807	120655	147219
22	0	0	0	19.7273	87.4441	160.636	629.961	2708.67	4115.89	5866.11	7843.39	8348.33	8910.01	9534.26	10229.2	11003.7	11867.8	12832.9	13911.4	15115.9	16464	18555.9	20963.7	23727.8	30141.5	36137.7	39667.4	43861.3	44962.2	46092.8	47253.8	48446.1	49670.1	52659.5	55755.4	58961.2	62279.4	65713.3	65408.5	64588.6	63635.8	62500.1	61230.1	73084.5	83501.9	92621.4	100537	119825	132363
23	0	0	0	0	0	0	28.6054	165.56	204.489	220.401	155.419	257.292	358.114	559.036	756.552	1125.32	1485.83	1953.99	2553.17	3810.64	4368.54	4722.65	2898.09	3222.1	4000.45	5138.87	6876.5	10413.8	11239.4	11186.4	11148.2	11106.5	11066.1	10929.4	10802	10671.4	10542.6	10407.9	10534.8	10705.3	10721.8	10465.8	10060.7	8637.33	7173.85	6654.96	6659.9	7616.96	10708.6
24	0	0	0	0	0	0	0	6.67437	12.3844	63.9565	82.6415	89.6227	97.294	105.579	114.431	124.114	134.467	145.653	157.758	170.896	185.214	200.936	219.201	246.457	279.802	321.11	372.923	437.433	460.698	485.801	513.02	542.695	575.239	611.151	651.045	695.669	817.467	948.51	1045.97	1140.78	1309.04	1688.44	2962.4	6016.42	10721.8	21237.1	26363.3	41961.5	63185.6
25	0	0	0	1816.17	2747.73	4636.92	8528.32	23595.2	32952.7	45111.1	70934.7	73674.1	76233.1	76241	76133.2	75934.6	75665.8	76488.1	77110.7	79211.7	81045.7	81709	82305.2	72266	77387.4	79517.1	98706.2	112032	115533	119084	122854	126845	131080	135561	140290	145276	150510	156002	158825	163885	164089	172802	171154	166900	161803	159187	148315	147059	152820
26	0	0	0	0	0	42.8662	180.851	770.108	1115.65	1630.76	2404.61	2868.84	3433.69	4123.36	4968.94	6009.55	7295.4	8889.89	10874	13374.2	15834.5	20742.9	25657.3	30577.2	36021.8	34027.6	38528.9	43016.9	36096.4	36697.1	37324.1	37980.4	38670.1	39395.9	40163.9	40978.9	41847.2	42777.9	48047.3	49317	50705.5	52871.2	55293.5	58019.3	60628.2	63616.1	67104.6	71287.1	76654.9
27	0	0	0	0	0	0	0	0	0	0	0	0	0	0	0	0	0	0	0	0	0	0	0	0	0	0	0	0	0	0	0	0	0	0	0	0	0	0	0	0	0	0	0	0	0	0	0	0	0
Total	0	0	100.495	17945.1	38685.6	101336	268945	469023	706994	1.14041e+06	1.92465e+06	1.92199e+06	1.89625e+06	1.76255e+06	1.72338e+06	1.66862e+06	1.65603e+06	1.63773e+06	1.6343e+06	1.74448e+06	1.77818e+06	2.12682e+06	2.42009e+06	2.46883e+06	2.19647e+06	2.52967e+06	2.64216e+06	2.84857e+06	2.96524e+06	3.08692e+06	3.19925e+06	3.30795e+06	3.44644e+06	3.56328e+06	3.68663e+06	3.82224e+06	3.97376e+06	4.15464e+06	4.34182e+06	4.53995e+06	4.77653e+06	5.11356e+06	5.44165e+06	5.81119e+06	6.06671e+06	6.67152e+06	7.22658e+06	7.7709e+06	8562412
Percentage of rain fed other crops
region	-10000	-9000	-8000	-7000	-6000	-5000	-4000	-3000	-2000	-1000	0	100	200	300	400	500	600	700	800	900	1000	1100	1200	1300	1400	1500	1600	1700	1710	1720	1730	1740	1750	1760	1770	1780	1790	1800	1810	1820	1830	1840	1850	1860	1870	1880	1890	1900	1910
1	0	0	0	0	0	0	0	0	0	0	0	0	0	0	0	0	0	0	0	0	0	0	0	0	0	0	0	2.29908e-05	2.97734e-05	3.85968e-05	5.00859e-05	6.50605e-05	8.45964e-05	0.000110107	0.000143449	0.000246997	0.000334067	0.000487078	0.000662279	0.000907381	0.00125134	0.00173816	0.00242407	0.00394842	0.00547818	0.00679776	0.00852928	0.00937159	0.0161688
2	0	0	0	0	0	0	0	0	3.14864e-05	0.000234324	0.000468104	0.000490396	0.000513745	0.000538212	0.00056384	0.00059069	0.000618817	0.000648284	0.00067459	0.00076151	0.000848887	0.000920721	0.0010254	0.00111742	0.0012495	0.00137361	0.000649451	0.000823336	0.00114011	0.00148241	0.00188368	0.00231151	0.00280631	0.00338463	0.00408633	0.00496368	0.00608962	0.00864476	0.0116445	0.0158831	0.0224003	0.0321025	0.0441466	0.063056	0.0717053	0.108332	0.135447	0.155593	0.178291
3	0	0	0	0	0	0.000143932	0.000465008	0.00126391	0.00790314	0.0100981	0.0128958	0.0138806	0.0149405	0.0160813	0.0173093	0.0186311	0.0200539	0.0215854	0.0232337	0.0273144	0.0315518	0.0364868	0.04161	0.0469266	0.0524423	0.0581633	0.00237039	0.00967499	0.0106814	0.0117264	0.0128111	0.013937	0.0151048	0.0163161	0.0175721	0.018874	0.0202232	0.0216211	0.0227715	0.0239735	0.0252286	0.026538	0.0279036	0.0293269	0.0308095	0.0323421	0.0401737	0.0488355	0.0555075
4	0	0	0	0	0	0.000496004	0.00170591	0.0058896	0.00637024	0.0068619	0.00724241	0.00791696	0.00864158	0.00944507	0.0103388	0.0113362	0.0124539	0.0137122	0.0151148	0.0182453	0.0214893	0.0236166	0.0260475	0.0288713	0.0322145	0.0362647	0.0147574	0.0111369	0.0113744	0.0116659	0.0120213	0.0124528	0.0129752	0.0136072	0.0143718	0.0153905	0.0165749	0.0179554	0.0195194	0.0212873	0.0249649	0.0275018	0.0308526	0.0337027	0.0368009	0.0402918	0.0441596	0.0467104	0.0540261
5	0	0	0	0	0	0	1.00194e-05	2.00389e-05	4.00776e-05	8.01551e-05	0.000160311	0.000171312	0.000183071	0.000195636	0.000209064	0.000223413	0.000238745	0.000255131	0.000272644	0.000277476	0.000282373	0.000312822	0.00034327	0.000373721	0.000404169	0.000466243	0.000123749	0.000161745	0.00017567	0.000190942	0.000207571	0.000225867	0.000246204	0.000268615	0.000293573	0.00032154	0.000353065	0.000388856	0.000481348	0.00059109	0.000750517	0.000910607	0.0010712	0.00123167	0.00139054	0.00153431	0.00187453	0.00219531	0.00256783
6	0	0	0	0	3.02216e-05	0.000276146	0.000953092	0.00336032	0.00371381	0.00405701	0.00432467	0.0045239	0.00473067	0.00494302	0.00516069	0.00538299	0.00560906	0.00583568	0.0060654	0.00652694	0.00694502	0.00737394	0.00773945	0.0080353	0.00824465	0.0118481	0.00799429	0.00684708	0.00720691	0.00758091	0.00796981	0.00837456	0.0087961	0.00923544	0.00969362	0.010172	0.0106719	0.0111945	0.0101948	0.00952131	0.0104435	0.01127	0.0121814	0.0129865	0.0133617	0.0145582	0.0163119	0.0172955	0.022631
7	0	0	0	1.28222e-05	0.000216733	0.00103111	0.0056821	0.00748135	0.00650205	0.00811633	0.0105838	0.010802	0.0109979	0.0101654	0.00936463	0.00858358	0.00789743	0.00789527	0.00817966	0.00864346	0.00902558	0.00801865	0.00737239	0.00739078	0.00653078	0.00626895	0.00826723	0.00655452	0.00662244	0.00679923	0.00697577	0.0071521	0.00732849	0.00750503	0.00768193	0.00785948	0.00803794	0.00821773	0.0083741	0.00862394	0.00966435	0.010701	0.0117352	0.0127686	0.0138034	0.0148427	0.015961	0.0172204	0.0181862
8	0	0	0	0	0	3.22779e-05	0.000136709	0.000578816	0.00082853	0.00118924	0.00171318	0.00201106	0.00237353	0.0028178	0.00336573	0.00404398	0.0048923	0.00595741	0.00730181	0.00836251	0.00946567	0.010455	0.0115041	0.01297	0.0145861	0.0162552	0.0190449	0.0223661	0.0224949	0.0225852	0.0226907	0.0228121	0.0229496	0.0231043	0.0232772	0.0234699	0.0236835	0.0239204	0.0241836	0.0244857	0.0248205	0.0251932	0.0256115	0.0260846	0.0266665	0.0273359	0.0281227	0.0290932	0.0303972
9	0	0	0	0	0	3.92752e-05	0.000180984	0.000841934	0.00135544	0.00220669	0.00360547	0.00385411	0.00413985	0.0044715	0.00485998	0.00531966	0.00586932	0.00653109	0.00734599	0.00793541	0.00852328	0.00906654	0.0096013	0.0103844	0.0111468	0.0119082	0.012837	0.0136384	0.0138073	0.0139555	0.0141103	0.0142725	0.0144427	0.0146221	0.0148117	0.0150129	0.0152283	0.0154583	0.0162407	0.0164985	0.0177477	0.0190056	0.0202888	0.0216313	0.023012	0.0244479	0.0259621	0.0275908	0.0292308
10	0	0	0	0	0	0	0	0	0	0	0	0	0	0	0	0	0	0	0	0	0	0	0	0	0	8.70019e-08	0.000894837	0.00255649	0.0050485	0.00494311	0.0048376	0.00473208	0.00462654	0.00452094	0.00441533	0.00430967	0.00420395	0.00409821	0.00368174	0.00326523	0.00284868	0.00243209	0.00279271	0.00352555	0.00502384	0.0119341	0.0149423	0.0217095	0.0297093
11	0	0	0	2.59603e-05	0.00052944	0.000823746	0.00186077	0.00517322	0.0125058	0.0274999	0.073837	0.0782087	0.0777311	0.0713595	0.0642332	0.0522226	0.0420222	0.046306	0.0531305	0.063011	0.0717909	0.0917948	0.127213	0.163457	0.105283	0.1324	0.155699	0.166799	0.171263	0.174493	0.177843	0.181176	0.190629	0.193305	0.1958	0.198509	0.200711	0.204379	0.206951	0.214704	0.219917	0.229633	0.240945	0.242294	0.248494	0.252963	0.256269	0.265225	0.268602
12	0	0	0	5.46845e-06	2.73423e-05	0.000513839	0.00256561	0.0103843	0.0201924	0.0328424	0.0490272	0.0512848	0.0524294	0.0501585	0.048313	0.0464219	0.0445696	0.0467658	0.0487919	0.0533706	0.0575606	0.0630291	0.0841989	0.0975254	0.0818031	0.0984249	0.111527	0.116253	0.12469	0.130548	0.136619	0.142918	0.149461	0.156264	0.163343	0.170713	0.178394	0.186404	0.194754	0.203503	0.219191	0.234209	0.249206	0.269783	0.289337	0.315771	0.341208	0.359041	0.380447
13	0	0	0	0.00111853	0.00335559	0.021252	0.0348228	0.0473932	0.0910527	0.129659	0.160514	0.172229	0.183627	0.16886	0.15428	0.139896	0.125695	0.136407	0.146638	0.159352	0.171396	0.123203	0.142227	0.159928	0.125558	0.131051	0.161164	0.162865	0.163718	0.164998	0.166252	0.167475	0.168664	0.169813	0.170918	0.17197	0.172964	0.17389	0.174495	0.175013	0.179499	0.183397	0.187245	0.191011	0.194654	0.19567	0.196084	0.196105	0.194942
14	0	0	0	0	0	0.000345802	0.00193296	0.00512353	0.00567941	0.00620637	0.00661121	0.00725632	0.00791565	0.00859158	0.00928647	0.00963735	0.0100292	0.0108153	0.0116333	0.0124866	0.0133422	0.0200442	0.0301019	0.0301184	0.030105	0.0400586	0.0498462	0.0658728	0.0724237	0.0794229	0.0871137	0.0955657	0.104856	0.111185	0.117882	0.124966	0.132455	0.140366	0.14869	0.158967	0.170189	0.183821	0.193591	0.215703	0.238077	0.271584	0.310122	0.364051	0.432188
15	0	0	0	0	1.98803e-05	0.000104124	0.00036621	0.00127773	0.00145484	0.00164308	0.00172037	0.00180463	0.00192326	0.00204933	0.00218332	0.00232566	0.00247689	0.00263745	0.0028041	0.00290227	0.00299847	0.00319008	0.00340001	0.00360534	0.00381192	0.00404639	0.0045827	0.00507228	0.00537212	0.00565224	0.00596388	0.00631173	0.00670147	0.00714001	0.00763577	0.00819906	0.00884265	0.00958225	0.0100175	0.010592	0.0113357	0.0122853	0.0134867	0.014997	0.0168868	0.0192446	0.0221807	0.025832	0.0300764
16	0	0	0	0	4.49185e-06	7.61714e-05	0.000129137	0.000291603	0.000324978	0.00104092	0.00117619	0.00130566	0.00143577	0.00156632	0.00169735	0.00171329	0.0017296	0.00186169	0.00199393	0.00212066	0.00224555	0.00335028	0.00490318	0.00519973	0.0049885	0.00635622	0.00784326	0.00883434	0.00954364	0.0106287	0.0117166	0.0128086	0.0139387	0.0150497	0.0161673	0.0172938	0.0184326	0.0195837	0.0206805	0.0219465	0.0233502	0.0274655	0.0296631	0.0339298	0.0367019	0.0421274	0.048306	0.0541558	0.0671975
17	0	0	1.92834e-05	8.46644e-05	0.000516192	0.00265227	0.0142053	0.0163459	0.0137825	0.0150195	0.0173099	0.0194727	0.0223048	0.0259606	0.0230747	0.0207227	0.0188602	0.0176243	0.0166536	0.0185743	0.0152666	0.0151434	0.0148236	0.0115974	0.0108587	0.0112297	0.0132756	0.0124149	0.0126617	0.0127988	0.0129383	0.0130801	0.0132244	0.0133711	0.0135203	0.013672	0.0138263	0.0139832	0.0189924	0.0191077	0.019762	0.0203549	0.020939	0.021519	0.022242	0.0247979	0.0273106	0.0288181	0.0284697
18	0	0	0	0.00452948	0.00811275	0.0145307	0.0259713	0.0465244	0.0833416	0.149293	0.26743	0.25518	0.242924	0.230672	0.218604	0.206788	0.195276	0.184111	0.173327	0.162943	0.152974	0.143432	0.134321	0.12564	0.117387	0.109554	0.102135	0.113108	0.121839	0.131234	0.141346	0.152227	0.163936	0.176535	0.19009	0.204674	0.220363	0.237244	0.251784	0.267101	0.283404	0.301389	0.319892	0.318546	0.316401	0.314199	0.308972	0.309546	0.311707
19	0	0	0	0	0	0.000117591	0.000918307	0.00398643	0.00463387	0.00526642	0.00574264	0.00747801	0.00974795	0.0127147	0.0165808	0.0216196	0.0281798	0.0367041	0.0477595	0.0521126	0.0559886	0.0647226	0.0827448	0.0591523	0.0652612	0.0697619	0.0802529	0.0898961	0.0975084	0.102353	0.10739	0.112603	0.118009	0.123578	0.12932	0.135226	0.141248	0.147394	0.153587	0.159783	0.157757	0.154007	0.149812	0.146044	0.141803	0.136626	0.131194	0.125321	0.10292
20	0	0	6.81482e-08	2.69355e-05	0.000112008	0.000423336	0.00120582	0.0026924	0.00556032	0.0109849	0.0212457	0.0192721	0.0165132	0.00830878	0.0118099	0.0150922	0.0209311	0.0176526	0.0140425	0.0173363	0.0165261	0.0418172	0.0488872	0.0391169	0.035652	0.0464347	0.0507578	0.0531844	0.0555114	0.0579328	0.0590274	0.0593638	0.0598509	0.060239	0.0607081	0.0615146	0.0632034	0.0652664	0.0674824	0.0695774	0.0700357	0.0700524	0.0701344	0.0704007	0.0697459	0.0694915	0.0710345	0.0726528	0.0737569
21	0	0	0	0	0	3.09275e-05	0.000176696	0.000790869	0.000807787	0.00146406	0.00219532	0.0024008	0.00260995	0.00282429	0.00304549	0.00327608	0.00351968	0.00378182	0.00407076	0.00429515	0.0045172	0.00557553	0.00663306	0.00688295	0.00810538	0.0093231	0.0115125	0.0135532	0.0140591	0.0145793	0.0150987	0.0156194	0.01614	0.0166629	0.017186	0.0177093	0.0182368	0.0187658	0.0196406	0.0205003	0.0218721	0.0232539	0.0247853	0.027777	0.0307403	0.0352361	0.0426129	0.0468225	0.0571311
22	0	0	0	8.16666e-06	3.62e-05	6.64996e-05	0.00026079	0.00112133	0.00170389	0.00242844	0.00324699	0.00345603	0.00368855	0.00394698	0.00423465	0.00455528	0.00491302	0.00531255	0.00575904	0.00625766	0.00681572	0.00768173	0.00867852	0.00982278	0.0124779	0.0149602	0.0164214	0.0181576	0.0186134	0.0190814	0.0195621	0.0200556	0.0205623	0.0217999	0.0230815	0.0244087	0.0257823	0.0272039	0.0270777	0.0267383	0.0263438	0.0258737	0.0253479	0.0302554	0.034568	0.0383433	0.04162	0.049605	0.0547956
23	0	0	0	0	0	0	6.78958e-05	0.000392963	0.000485361	0.000523129	0.000368893	0.000610692	0.000849995	0.00132689	0.0017957	0.00267099	0.00352667	0.00463785	0.00606002	0.00904468	0.0103689	0.0112094	0.00687872	0.00764776	0.0094952	0.0121973	0.0163216	0.0247174	0.0266771	0.0265513	0.0264607	0.0263617	0.0262657	0.0259413	0.025639	0.0253289	0.0250231	0.0247034	0.0250046	0.0254095	0.0254486	0.0248409	0.0238794	0.020501	0.0170274	0.0157958	0.0158075	0.0180791	0.0254172
24	0	0	0	0	0	0	0	8.30714e-07	1.54141e-06	7.96025e-06	1.02858e-05	1.11547e-05	1.21095e-05	1.31407e-05	1.42425e-05	1.54476e-05	1.67362e-05	1.81285e-05	1.96351e-05	2.12703e-05	2.30523e-05	2.50092e-05	2.72825e-05	3.06748e-05	3.48251e-05	3.99664e-05	4.64153e-05	5.44444e-05	5.734e-05	6.04644e-05	6.38523e-05	6.75457e-05	7.15962e-05	7.60659e-05	8.10313e-05	8.65854e-05	0.000101745	0.000118055	0.000130185	0.000141985	0.000162928	0.000210149	0.00036871	0.000748824	0.00133447	0.00264324	0.00328126	0.00522267	0.0078643
25	0	0	0	0.000985224	0.00149057	0.00251541	0.00462639	0.0127998	0.017876	0.0244716	0.0384802	0.0399663	0.0413544	0.0413587	0.0413003	0.0411925	0.0410467	0.0414928	0.0418305	0.0429703	0.0439652	0.044325	0.0446484	0.0392024	0.0419806	0.0431359	0.0535455	0.0607742	0.0626734	0.0645998	0.0666451	0.0688099	0.0711077	0.0735384	0.0761034	0.0788084	0.0816475	0.0846272	0.0861585	0.0889035	0.0890138	0.0937403	0.0928466	0.0905387	0.0877738	0.0863547	0.0804568	0.0797758	0.0829009
26	0	0	0	0	0	7.65432e-06	3.22933e-05	0.000137513	0.000199214	0.000291193	0.000429375	0.000512268	0.00061313	0.000736279	0.000887269	0.00107308	0.00130269	0.00158741	0.00194168	0.00238814	0.00282745	0.00370392	0.00458144	0.00545995	0.00643216	0.00607607	0.00687983	0.00768123	0.00644548	0.00655275	0.00666469	0.0067819	0.00690505	0.00703465	0.00717179	0.00731731	0.00747235	0.00763856	0.00857946	0.00880619	0.00905412	0.00944084	0.00987337	0.0103601	0.0108259	0.0113595	0.0119824	0.0127292	0.0136877
27	0	0	0	0	0	0	0	0	0	0	0	0	0	0	0	0	0	0	0	0	0	0	0	0	0	0	0	0	0	0	0	0	0	0	0	0	0	0	0	0	0	0	0	0	0	0	0	0	0
Total	0	0	7.70852e-07	0.000137648	0.000296739	0.0007773	0.00206294	0.00359765	0.005423	0.00874752	0.0147631	0.0147426	0.0145452	0.0135196	0.0132192	0.0127991	0.0127026	0.0125622	0.0125359	0.013381	0.0136395	0.0163138	0.0185633	0.0189372	0.0168481	0.0194039	0.0202667	0.02185	0.0227449	0.0236782	0.0245399	0.0253737	0.026436	0.0273322	0.0282783	0.0293186	0.0304807	0.0318682	0.033304	0.0348237	0.0366384	0.0392236	0.0417402	0.0445748	0.0465347	0.0511739	0.0554316	0.0596068	0.0656781
Rain fed other crops (than rice) area per capita (ha/cap)
region	-10000	-9000	-8000	-7000	-6000	-5000	-4000	-3000	-2000	-1000	0	100	200	300	400	500	600	700	800	900	1000	1100	1200	1300	1400	1500	1600	1700	1710	1720	1730	1740	1750	1760	1770	1780	1790	1800	1810	1820	1830	1840	1850	1860	1870	1880	1890	1900	1910
1	0	0	0	0	0	0.956811	2.78201	6.80518	38.2943	44.0307	50.5939	49.9088	49.2289	48.5532	47.8796	47.206	46.5288	45.8439	45.1451	53.0742	61.3078	59.0811	57.7513	56.9893	56.6112	56.5082	2.30294	9.39967	9.1317	8.6214	8.0767	7.51363	6.94558	6.38363	5.83661	5.31123	4.81234	4.3433	3.85564	3.38752	2.9683	2.59407	2.26121	1.67718	1.53799	1.38521	1.5308	1.72198	1.48991
2	0	0	0	0	0	0.0920225	0.284848	0.885079	0.861565	0.835264	0.793428	0.827907	0.8626	0.899944	0.940326	0.984161	1.03204	1.08463	1.14115	1.22433	1.2976	1.32377	1.31797	1.35038	1.36162	1.41274	1.39349	0.883077	0.609077	0.471584	0.390289	0.337801	0.302259	0.277747	0.261048	0.251821	0.246718	0.209064	0.175514	0.147653	0.132618	0.112227	0.0953333	0.077695	0.069435	0.0585582	0.0514239	0.0450541	0.0433563
3	0	0	0	0	0	0	0.00275368	0.00440593	0.00704943	0.0112791	0.0180466	0.0182817	0.0185201	0.0187614	0.019006	0.0192538	0.0195046	0.0197588	0.0200165	0.0176807	0.0158936	0.015536	0.0152536	0.0150251	0.0148363	0.0157457	0.10448	0.0341399	0.0342081	0.0345102	0.0350007	0.0356927	0.0366064	0.0377095	0.0390345	0.0406065	0.0424557	0.0446261	0.0528303	0.0621622	0.0757603	0.0883742	0.100098	0.110969	0.120951	0.128995	0.133566	0.136132	0.143007
4	0	0	0	0	0.141848	1.14114	3.44261	10.5079	9.92712	9.1169	7.99596	7.5473	7.1078	6.67435	6.24709	5.82586	5.4106	4.99944	4.59594	3.99685	3.51084	3.28354	3.00998	2.69638	2.34576	2.78695	4.00503	3.83502	3.87066	3.8845	3.87479	3.84019	3.77983	3.69333	3.58091	3.42646	3.25773	3.07644	2.49557	2.10142	1.99226	1.91324	1.8274	1.76736	1.63504	1.59869	1.60523	1.51907	1.66919
5	0	0	0	0.00821841	0.105839	0.383647	1.61077	1.61587	1.06999	1.01764	1.01106	0.963099	0.915195	0.789531	0.678837	0.580743	0.498696	0.465324	0.449944	0.466912	0.478832	0.383749	0.321351	0.295771	0.241571	0.201217	5.60089	7.15111	6.28073	5.57652	4.92179	4.31789	3.76562	3.26481	2.8145	2.41292	2.05774	1.74604	1.38957	1.16524	1.02827	0.937928	0.873476	0.824897	0.786652	0.760372	0.658238	0.58612	0.491049
6	0	0	0	0	0	0.0242219	0.0867633	0.309886	0.373225	0.442736	0.521363	0.574801	0.637349	0.710728	0.797366	0.899664	1.02193	1.1681	1.3435	1.39204	1.43815	1.44741	1.46312	1.52449	1.59347	1.65869	3.93578	4.745	4.68896	4.6256	4.56622	4.51079	4.45922	4.41144	4.36749	4.32748	4.29135	4.2593	4.22253	3.98194	3.41902	3.03607	2.65263	2.29738	2.11117	1.85237	1.53583	1.36619	1.19267
7	0	0	0	0	0	0.0456976	0.118949	0.243839	0.253278	0.279789	0.257189	0.259771	0.264292	0.29715	0.336504	0.39041	0.457796	0.478382	0.49791	0.485287	0.474822	0.558253	0.631026	0.626531	0.765268	0.839198	0.682604	0.857752	0.866313	0.86891	0.871819	0.875057	0.878653	0.882655	0.887106	0.892062	0.897652	0.903829	0.897292	0.860871	0.824468	0.795437	0.772398	0.803028	0.771101	0.742329	0.665837	0.624938	0.600879
8	0	0	0	0	0	0	0	0	0	0	0	0	0	0	0	0	0	0	0	0	0	0	0	0	0	3.40564e-07	0.0030081	0.00736237	0.0144795	0.0141424	0.0137961	0.0134414	0.0130791	0.0127099	0.0123339	0.0119521	0.0115646	0.0111719	0.00993566	0.00870903	0.00750053	0.00631287	0.00713469	0.00884832	0.0123334	0.0285741	0.0347587	0.0487813	0.0638394
9	0	0	0	0.0572544	0.806531	0.853933	1.29373	2.37927	3.7562	5.32947	9.13362	8.91803	8.11689	6.77444	5.49935	3.99611	2.84629	2.74601	2.72469	2.98702	3.16388	3.73458	4.80608	5.66917	3.37478	3.91802	4.21301	4.15718	4.20666	4.23424	4.26197	4.28635	4.45042	4.45121	4.44457	4.43924	4.41788	4.42459	4.40298	4.48477	4.22222	4.07402	3.96753	3.69389	3.53919	3.37084	3.20306	3.10821	2.94763
10	0	0	0	1.00988	2.52633	23.748	59.302	120.031	116.713	94.9211	70.8519	66.7026	61.3721	52.8421	45.8078	39.6128	34.2288	32.3238	30.3515	30.1815	29.8381	27.2276	31.1766	31.5973	23.5584	25.5107	24.7775	18.0798	19.7651	21.0996	22.5228	24.0426	25.6674	27.407	29.2718	31.2728	33.423	35.7365	38.2268	40.9187	45.1759	49.5092	44.755	39.3	31.7787	17.5259	15.4281	11.6396	9.19404
11	0	0	0	0.421904	0.875999	3.66081	3.15187	2.22021	1.69544	1.1562	0.491776	0.506765	0.521085	0.507848	0.493441	0.525616	0.577333	0.568597	0.551522	0.536122	0.51814	0.306527	0.260819	0.201304	0.239216	0.190333	0.178264	0.158907	0.149919	0.145062	0.140323	0.135954	0.131879	0.128016	0.124381	0.12049	0.116424	0.112923	0.10838	0.101251	0.0954922	0.0902	0.0872793	0.0841925	0.081064	0.0755874	0.0707865	0.0653985	0.0595557
12	0	0	0	0	0	0.0890062	0.302809	0.482818	0.276827	0.17808	0.107474	0.112978	0.118103	0.129203	0.140742	0.152839	0.166756	0.168414	0.1703	0.16362	0.158205	0.210221	0.222196	0.18985	0.217385	0.23564	0.236372	0.283451	0.29264	0.305172	0.318414	0.332385	0.347098	0.350303	0.353514	0.356693	0.359804	0.362804	0.365467	0.370827	0.364081	0.361913	0.353224	0.357935	0.361351	0.369655	0.382108	0.416425	0.454611
13	0	0	0	0	0.0386539	0.0639325	0.133507	0.331246	0.188579	0.141986	0.111499	0.107963	0.106842	0.122603	0.141503	0.164431	0.192637	0.186476	0.181737	0.170354	0.160829	0.23406	0.211545	0.194723	0.255574	0.251762	0.222758	0.232053	0.242931	0.251947	0.262041	0.273363	0.286096	0.300465	0.316737	0.335242	0.356393	0.380684	0.392288	0.408864	0.421638	0.441727	0.468761	0.503878	0.548462	0.611629	0.690847	0.788481	0.899668
14	0	0	0	0	0.0306742	0.445854	0.647897	1.254	1.19788	3.28874	3.18524	3.27439	3.34035	3.38587	3.41378	3.25417	3.10036	3.10926	3.10559	3.08277	3.06031	3.04392	2.96987	3.14949	3.02155	2.88749	2.8504	2.40795	2.39135	2.50826	2.60381	2.68022	2.746	2.79101	2.82207	2.84096	2.84938	2.84832	2.82964	2.795	2.7629	2.98943	3.05223	3.1024	3.0137	2.9994	2.98117	2.81655	2.90867
15	0	0	0.0258508	0.0972848	0.508408	2.23908	10.2791	10.1383	7.32724	6.84417	6.76101	7.0987	7.58909	8.24409	6.83913	5.73254	4.86952	4.24707	3.74561	4.03716	3.21031	3.02222	2.80474	2.02267	1.74445	1.65972	1.71683	1.43032	1.40763	1.37914	1.35013	1.32066	1.29079	1.26062	1.23021	1.19965	1.16898	1.13832	1.48753	1.43883	1.42969	1.41382	1.39546	1.37513	1.36205	1.38675	1.41318	1.32957	1.18275
16	0	0	0	2.87189	4.40903	6.76877	10.3697	15.9222	24.4469	37.5343	57.6247	49.2805	42.464	36.7902	32.0145	29.8714	27.7385	23.9859	20.6645	18.1733	16.0277	10.0187	6.37206	5.58436	5.4082	3.93431	2.95134	2.87126	2.8798	2.78617	2.72247	2.68193	2.66001	2.65357	2.66015	2.67824	2.70641	2.74387	2.75037	2.73184	2.70894	2.45232	2.4023	2.09324	1.91795	1.6626	1.42888	1.27797	1.04341
17	0	0	0	0	0	0.00227889	0.0103553	0.0300966	0.0238591	0.0192892	0.0136044	0.0155031	0.0174545	0.0194394	0.0263574	0.0350324	0.0455645	0.0606932	0.0800512	0.0843199	0.101898	0.118553	0.149916	0.122231	0.142526	0.143547	0.139476	0.166662	0.177378	0.18366	0.190055	0.196519	0.203072	0.209645	0.216247	0.222848	0.229363	0.23579	0.241357	0.246493	0.233221	0.218595	0.204343	0.191588	0.178248	0.154887	0.135611	0.121162	0.0934696
18	0	0	0.000225177	0.0451591	0.0952826	0.182723	0.264083	0.299186	0.313504	0.314257	0.308389	0.266421	0.217904	0.104874	0.142854	0.175254	0.233709	0.189801	0.145593	0.173546	0.159921	0.391603	0.443504	0.344116	0.304408	0.385147	0.409305	0.350896	0.358289	0.365963	0.365108	0.359695	0.355394	0.350685	0.346619	0.344598	0.3475	0.35232	0.357778	0.369484	0.352979	0.35972	0.329097	0.314099	0.296591	0.294129	0.276546	0.278001	0.304086
19	0	0	0	0	0	0.121125	0.553613	1.98231	1.61978	2.34859	2.81732	2.32186	1.89975	1.54526	1.25091	1.0089	0.81168	0.65228	0.524487	0.49191	0.465607	0.478911	0.427311	0.591211	0.596754	0.600607	0.59332	0.558792	0.527348	0.513645	0.499599	0.485367	0.470978	0.456576	0.44215	0.427757	0.413538	0.399463	0.392442	0.384471	0.404652	0.428945	0.455842	0.506295	0.555338	0.633545	0.761226	0.830995	0.997012
20	0	0	0	0.00185728	0.00498505	0.00553504	0.0131009	0.0339581	0.0310764	0.0438194	0.0134373	0.0161076	0.0204412	0.042683	0.033513	0.0291499	0.023433	0.0304285	0.0417727	0.0376209	0.0440578	0.0203041	0.0200591	0.0292972	0.0418374	0.0392499	0.040123	0.0434131	0.0425041	0.0380001	0.0366545	0.0334325	0.0275438	0.0264455	0.0250825	0.0212149	0.0206872	0.0223188	0.0189898	0.018177	0.0162727	0.0151096	0.0141717	0.0172003	0.0231216	0.0253414	0.0266643	0.0298068	0.0311028
21	0	0	0	0	0	0	0.00674912	0.0283716	0.0259799	0.0145279	0.0059513	0.00905379	0.0116282	0.0168055	0.0211089	0.0291927	0.0358692	0.0438918	0.0532959	0.0751237	0.0815876	0.0721308	0.037436	0.0386595	0.0417687	0.0474969	0.0539883	0.0703407	0.073218	0.0702491	0.0675715	0.0650501	0.0626948	0.0599574	0.0574326	0.0550377	0.0527867	0.0506297	0.048597	0.046954	0.0434146	0.0390866	0.0347399	0.026631	0.0199757	0.0162759	0.0145107	0.0149277	0.0184732
22	0	0	0	0	0	0	0	0.00238571	0.00123533	0.00361362	0.00317354	0.00319104	0.00322735	0.00327635	0.00333415	0.00340623	0.00348579	0.00357535	0.00367502	0.00378541	0.00390765	0.00385649	0.00385563	0.00399769	0.00367737	0.00354461	0.00376986	0.00398229	0.00415349	0.00433779	0.00453723	0.00475446	0.00499247	0.00508028	0.00519268	0.0053326	0.00603135	0.00674535	0.00708182	0.00736391	0.0080732	0.00996752	0.016769	0.0272305	0.0404441	0.0686697	0.0745917	0.105535	0.132801
23	0	0	0	10.3437	10.4328	11.7372	14.3916	26.5446	24.7146	22.5556	23.6449	14.7348	10.8905	6.93101	5.07555	3.37488	2.52219	1.69974	1.40201	1.23769	1.35076	1.31789	1.28602	0.989944	0.832123	0.646478	0.580628	0.419594	0.398388	0.410634	0.423634	0.437395	0.452001	0.470699	0.490524	0.511534	0.533722	0.557152	0.551476	0.553667	0.539766	0.553852	0.534857	0.503112	0.471083	0.432491	0.370074	0.328446	0.303406
24	0	0	0	0	0	0.0171386	0.0722746	0.307487	0.444658	0.624651	0.907308	1.07585	1.27898	1.52438	1.82176	2.18302	2.623	3.1598	3.81562	4.6254	5.38688	6.92496	7.96434	9.13114	10.4172	8.10598	7.73486	7.45948	6.31362	6.35209	6.3873	6.41892	6.44659	6.46949	6.48721	6.49873	6.49825	6.48353	7.33125	7.18436	6.7302	6.03781	4.60814	3.04623	2.36288	1.9973	1.57717	1.40627	1.28953
25	0	0	0	0	0	0	0	0	0	0	0	0	0	0	0	0	0	0	0	0	0	0	0	0	0	0	0	0	0	0	0	0	0	0	0	0	0	0	0	0	0	0	0	0	0	0	0	0	0
26	0	0	0	0	0	0	0	0	0	0	0	0	0	0	0	0	0	0	0	0	0	0	0	0	0	0	0	0	0	0	0	0	0	0	0	0	0	0	0	0	0	0	0	0	0	0	0	0	0
27	0	0	0	0	0	0	0	0	0	0	0	0	0	0	0	0	0	0	0	0	0	0	0	0	0	0	0	0	0	0	0	0	0	0	0	0	0	0	0	0	0	0	0	0	0	0	0	0	0
Total	0	0	0	0	0	0	0	0	0	0	0	0	0	0	0	0	0	0	0	0	0	0	0	0	0	0	0	0	0	0	0	0	0	0	0	0	0	0	0	0	0	0	0	0	0	0	0	0	0
in km2	-10000	-9000	-8000	-7000	-6000	-5000	-4000	-3000	-2000	-1000	0	100	200	300	400	500	600	700	800	900	1000	1100	1200	1300	1400	1500	1600	1700	1710	1720	1730	1740	1750	1760	1770	1780	1790	1800	1810	1820	1830	1840	1850	1860	1870	1880	1890	1900	1910
North America	0	0	0	0	0	0	0	0	285.859	2127.38	4249.82	4452.2	4664.19	4886.32	5118.99	5362.75	5618.11	5885.64	6124.47	6913.6	7706.88	8359.04	9309.37	10144.8	11344	12470.8	5896.23	7679.93	10616.4	13802.7	17548.3	21565.9	26232.3	31710.3	38378.3	47267	58265.7	82827.8	111625	152291	214527	306953	422416	607685	699853	1.04415e+06	1.30576e+06	1.49618e+06	1.76286e+06
Latin America	0	0	0	0	277.573	3180.58	10995.9	37817.7	54487.5	62604.5	71455.4	75787.5	80378	85241.9	90397.6	95862.1	101654	107775	114266	128777	143276	158626	173982	189362	204717	252431	89923.1	91239.4	96792	102601	108682	115059	121755	128798	136219	144128	152477	161311	156295	154671	169629	182981	197824	211434	221380	239128	276168	306616	377107
Europe	0	0	0	101.424	1955.86	3673.49	10177.3	32643.4	72344.4	143621	333247	352115	351914	325779	297477	251407	211952	230419	257869	299811	337244	417076	573788	723002	491084	611620	713608	760168	787634	807180	827444	847953	890971	909774	928286	947966	966222	990233	1010725	1.05053e+06	1.09041e+06	1.14572e+06	1.20679e+06	1.2392e+06	1.28784e+06	1.3394e+06	1.38541e+06	1.44173e+06	1.4826e+06
USSR	0	0	0	0	151.502	1948.22	5151.03	14010.2	15708.5	28700.6	31569.4	34567.5	37721.7	40925.6	44183.9	45290.2	46470.8	49925.2	53431.9	56610.7	59753.2	84272.3	119032	124743	122046	153757	188476	219966	238249	263032	288556	314916	342759	368034	393944	420582	448071	476484	503157	534777	570109	653017	702043	796627	868213	994627	1.13988e+06	1.29517e+06	1.58328e+06
N.Africa_M.East	0	0	99.7536	1382.59	6576.29	36404.1	134666	166310	181021	227071	277689	299276	323944	326396	295344	267323	242548	244450	249073	271659	266187	222117	231330	228480	192830	197434	243391	229957	232304	235069	237825	240568	243298	246009	248701	251370	254012	256624	283947	286447	299568	311893	324120	336256	349045	369306	389351	404740	407844
Tropical Africa	0	0	0	0	0	638.967	2791.18	12264.7	18448.2	28036.8	42939.6	48239.2	54589.7	62261.8	71599	83026.8	97156.6	114711	136721	154709	173129	192444	212395	238533	266781	288185	330874	379772	378339	380703	383305	386159	389275	392678	396389	400440	404864	409700	422025	427724	439711	452958	468074	484916	504032	531441	556385	589360	628873
China	0	0	0.741876	293.226	1219.34	4636.33	13344	30252.5	61626.5	120830	232643	211568	182071	93457.4	132485	169409	234523	200848	164161	201047	193144	470533	551760	439820	403545	521992	571534	600231	627363	654868	667975	672870	679450	684992	691456	701633	721441	745353	770941	795212	799723	799018	798918	800927	792796	788801	804315	820544	827267
South Asia	0	0	0	14331.9	25669.9	45977.1	82176.8	147210	263705	472385	846186	807427	768648	729880	691693	654306	617881	582554	548430	515575	484032	453840	425011	397544	371430	346644	323168	357890	385515	415244	447240	481669	518716	558583	601471	647618	697261	750676	796682	845147	896732	953638	1012183	1007925	1001138	994171	977633	979447	986286
SE Asia	0	0	0	1835.9	2835.17	4877.25	9613.61	28341.9	39150.2	54749.9	84435.1	88208.9	91868.5	93053	94210.2	95380.3	96603.3	99066.2	101512	105396	109150	114632	120361	113730	128415	139679	168040	190817	196723	202745	209015	215540	222341	231159	240331	249871	259782	270072	274844	281300	284086	295224	296252	311561	324518	342606	358659	387539	432402
Pacific Dev.	0	0	0	0	0	0	28.6054	172.235	216.873	284.357	238.061	346.915	455.408	664.614	870.983	1249.43	1620.3	2099.64	2710.93	3981.54	4553.75	4923.58	3117.3	3468.56	4280.25	5459.98	7249.43	10851.2	11700.1	11672.2	11661.2	11649.2	11641.3	11540.6	11453.1	11367.1	11360	11356.4	11580.8	11846.1	12030.9	12154.2	13023.1	14653.8	17895.6	27892	33023.2	49578.5	73894.2
Total	0	0	100.495	17945.1	38685.6	101336	268945	469023	706994	1.14041e+06	1.92465e+06	1.92199e+06	1.89625e+06	1.76255e+06	1.72338e+06	1.66862e+06	1.65603e+06	1.63773e+06	1.6343e+06	1.74448e+06	1.77818e+06	2.12682e+06	2.42009e+06	2.46883e+06	2.19647e+06	2.52967e+06	2.64216e+06	2.84857e+06	2.96524e+06	3.08692e+06	3.19925e+06	3.30795e+06	3.44644e+06	3.56328e+06	3.68663e+06	3.82224e+06	3.97376e+06	4.15464e+06	4.34182e+06	4.53995e+06	4.77653e+06	5.11356e+06	5.44165e+06	5.81119e+06	6.06671e+06	6.67152e+06	7.22658e+06	7.7709e+06	8.56241e+06
check	#DIV/0!	#DIV/0!	1	1	1	1	1	1	1	1	1	1	1	1	1	1	1	1	1	1	1	1	1	1	1	1	1	1	1	1	1	1	1	1	1	1	1	1	1	1	1	1	1	1	1	1	1	1	1
in Mha	-10000	-9000	-8000	-7000	-6000	-5000	-4000	-3000	-2000	-1000	0	100	200	300	400	500	600	700	800	900	1000	1100	1200	1300	1400	1500	1600	1700	1710	1720	1730	1740	1750	1760	1770	1780	1790	1800	1810	1820	1830	1840	1850	1860	1870	1880	1890	1900	1910
North America	0	0	0	0	0	0	0	0	0.0285859	0.212738	0.424982	0.44522	0.466419	0.488632	0.511899	0.536275	0.561811	0.588564	0.612447	0.69136	0.770688	0.835904	0.930937	1.01448	1.1344	1.24708	0.589623	0.767993	1.06164	1.38027	1.75483	2.15659	2.62323	3.17103	3.83783	4.7267	5.82657	8.28278	11.1625	15.2291	21.4527	30.6953	42.2416	60.7685	69.9853	104.415	130.576	149.618	176.286
Latin America	0	0	0	0	0.0277573	0.318058	1.09959	3.78177	5.44875	6.26045	7.14554	7.57875	8.0378	8.52419	9.03976	9.58621	10.1654	10.7775	11.4266	12.8777	14.3276	15.8626	17.3982	18.9362	20.4717	25.2431	8.99231	9.12394	9.6792	10.2601	10.8682	11.5059	12.1755	12.8798	13.6219	14.4128	15.2477	16.1311	15.6295	15.4671	16.9629	18.2981	19.7824	21.1434	22.138	23.9128	27.6168	30.6616	37.7107
Europe	0	0	0	0.0101424	0.195586	0.367349	1.01773	3.26434	7.23444	14.3621	33.3247	35.2115	35.1914	32.5779	29.7477	25.1407	21.1952	23.0419	25.7869	29.9811	33.7244	41.7076	57.3788	72.3003	49.1084	61.162	71.3608	76.0168	78.7634	80.718	82.7444	84.7953	89.0971	90.9774	92.8286	94.7966	96.6222	99.0233	101.073	105.053	109.041	114.572	120.679	123.92	128.784	133.94	138.541	144.173	148.26
USSR	0	0	0	0	0.0151502	0.194822	0.515103	1.40102	1.57085	2.87006	3.15694	3.45675	3.77217	4.09256	4.41839	4.52902	4.64708	4.99252	5.34319	5.66107	5.97532	8.42723	11.9032	12.4743	12.2046	15.3757	18.8476	21.9966	23.8249	26.3032	28.8556	31.4916	34.2759	36.8034	39.3944	42.0582	44.8071	47.6484	50.3157	53.4777	57.0109	65.3017	70.2043	79.6627	86.8213	99.4627	113.988	129.517	158.328
N.Africa_M.East	0	0	0.00997536	0.138259	0.657629	3.64041	13.4666	16.631	18.1021	22.7071	27.7689	29.9276	32.3944	32.6396	29.5344	26.7323	24.2548	24.4449	24.9073	27.1659	26.6187	22.2117	23.133	22.848	19.283	19.7434	24.3391	22.9957	23.2304	23.5069	23.7825	24.0568	24.3298	24.6009	24.8701	25.137	25.4012	25.6624	28.3947	28.6447	29.9568	31.1893	32.412	33.6256	34.9045	36.9306	38.9351	40.474	40.7844
Tropical Africa	0	0	0	0	0	0.0638967	0.279118	1.22647	1.84482	2.80368	4.29396	4.82392	5.45897	6.22619	7.1599	8.30268	9.71566	11.4711	13.6721	15.4709	17.3129	19.2444	21.2395	23.8533	26.6781	28.8185	33.0874	37.9772	37.8339	38.0703	38.3305	38.6159	38.9275	39.2678	39.6389	40.044	40.4864	40.97	42.2025	42.7724	43.9711	45.2958	46.8074	48.4916	50.4032	53.1441	55.6385	58.936	62.8873
China	0	0	7.41876e-05	0.0293226	0.121934	0.463633	1.3344	3.02525	6.16265	12.083	23.2643	21.1568	18.2071	9.34574	13.2485	16.9409	23.4523	20.0848	16.4161	20.1047	19.3144	47.0533	55.176	43.982	40.3545	52.1992	57.1534	60.0231	62.7363	65.4868	66.7975	67.287	67.945	68.4992	69.1457	70.1633	72.1441	74.5353	77.0941	79.5212	79.9723	79.9018	79.8918	80.0927	79.2796	78.8801	80.4315	82.0544	82.7267
South Asia	0	0	0	1.43319	2.56699	4.59771	8.21768	14.721	26.3705	47.2385	84.6186	80.7427	76.8648	72.988	69.1693	65.4306	61.7881	58.2554	54.843	51.5575	48.4032	45.384	42.5011	39.7544	37.143	34.6644	32.3168	35.789	38.5515	41.5244	44.724	48.1669	51.8716	55.8583	60.1471	64.7618	69.7261	75.0676	79.6682	84.5147	89.6732	95.3638	101.218	100.793	100.114	99.4171	97.7633	97.9447	98.6286
SE Asia	0	0	0	0.18359	0.283517	0.487725	0.961361	2.83419	3.91502	5.47499	8.44351	8.82089	9.18685	9.3053	9.42102	9.53803	9.66033	9.90662	10.1512	10.5396	10.915	11.4632	12.0361	11.373	12.8415	13.9679	16.804	19.0817	19.6723	20.2745	20.9015	21.554	22.2341	23.1159	24.0331	24.9871	25.9782	27.0072	27.4844	28.13	28.4086	29.5224	29.6252	31.1561	32.4518	34.2606	35.8659	38.7539	43.2402
Pacific Dev.	0	0	0	0	0	0	0.00286054	0.0172235	0.0216873	0.0284357	0.0238061	0.0346915	0.0455408	0.0664614	0.0870983	0.124943	0.16203	0.209964	0.271093	0.398154	0.455375	0.492358	0.31173	0.346856	0.428025	0.545998	0.724943	1.08512	1.17001	1.16722	1.16612	1.16492	1.16413	1.15406	1.14531	1.13671	1.136	1.13564	1.15808	1.18461	1.20309	1.21542	1.30231	1.46538	1.78956	2.7892	3.30232	4.95785	7.38942
Total	0	0	0.0100495	1.79451	3.86856	10.1336	26.8945	46.9023	70.6994	114.041	192.465	192.199	189.625	176.255	172.338	166.862	165.603	163.773	163.43	174.448	177.818	212.682	242.009	246.883	219.647	252.967	264.216	284.857	296.524	308.692	319.925	330.795	344.644	356.328	368.663	382.224	397.376	415.464	434.182	453.995	477.653	511.356	544.165	581.119	606.671	667.152	722.658	777.09	856.241
[truncated: 25 more columns]

## Sheet: rf_rice
Rain fed rice area (in 1000 km2)
region	-10000	-9000	-8000	-7000	-6000	-5000	-4000	-3000	-2000	-1000	0	100	200	300	400	500	600	700	800	900	1000	1100	1200	1300	1400	1500	1600	1700	1710	1720	1730	1740	1750	1760	1770	1780	1790	1800	1810	1820	1830	1840	1850	1860	1870	1880	1890	1900	1910
1	0	0	0	0	0	0	0	0	0	0	0	0	0	0	0	0	0	0	0	0	0	0	0	0	0	0	0	0	0	0	0	0	0	0	0	0	0	0	0	0	0	0	0	0	0	0	0	0	0
2	0	0	0	0	0	0	0	0	0	0	0	0	0	0	0	0	0	0	0	0	0	0	0	0	0	0	0	0	0	0	0	0	0	0	0	0	0	0	0	0	0	0	0	0	0	0	0	0	0
3	0	0	0	0	0	0	0	0	0	0	0	0	0	0	0	0	0	0	0	0	0	0	0	0	0	0	6.94836	27.7934	30.1258	32.4583	34.7907	37.1232	39.4556	41.788	44.1204	46.4529	48.7853	51.1178	53.4502	55.7826	58.115	60.4475	62.7799	65.1123	67.4448	69.7772	82.3325	94.6036	151.2
4	0	0	0	0	0	0	0	0	0	0	0	0	0	0	0	0	0	0	0	0	0	0	0	0	0	0	3.20712	27.7695	28.5634	29.3899	30.4204	31.6376	33.1955	35.3958	38.7172	44.9821	55.913	76.9705	118.647	127.199	139.895	154.576	171.194	195.622	233.669	280.206	354.184	465.868	458.166
5	0	0	0	0	0	0	0	0	0	0	0	0	0	0	0	0	0	0	0	0	0	0	0	0	0	0	0	0	0	0	0	0	0	0	0	0	0	0.1004	0.257115	0.631526	1.71841	5.99732	16.25	39.8718	93.1299	210.208	526.384	1280	2498.06
6	0	0	0	0	0	0	0	0	0	0	0	0	0	0	0	0	0	0	0	0	0	0	0	0	0	0	0	0.386267	0.423762	0.578557	0.74136	1.03084	1.57471	2.76015	5.1827	9.84988	19.2755	38.3722	78.3532	93.507	112.68	118.968	127.186	156.672	154.557	165.122	265.906	323.516	492.287
7	0	0	0	0	0	0	0	0	0	0	0	0	0	0	0	0	0	0	0	0	0	0	0	0	0	0	0	0	0	0	0	0	0	0	0	0	0	0	0	0	0	0	0	0	0	0	0	0	0
8	0	0	0	0	0	0	0	0	2.95497	4.37559	6.19004	8.09705	11.2121	15.4409	22.271	33.3469	53.1088	87.6835	149.363	242.426	396.163	489.639	622.173	807.136	1114.84	1596.32	2360.72	3589.88	3604.19	3614.11	3625.47	3638.42	3657.96	3675.91	3696.38	3719.74	3746.47	3777.46	3819.11	3867.44	3922.76	3986.7	4061.39	4149.74	4280.52	4450.67	4681.28	5017.22	5373.82
9	0	0	0	0	0	0	0	0	0	0	0	0	0	0	0.136739	0.410216	1.23065	3.69195	11.0759	24.9206	50.0922	106.365	206.544	380.111	675.609	1313.11	2401.66	4246.02	4281.43	4285.41	4289.92	4295	4300.48	4305.91	4312.21	4319.51	4327.98	4337.82	4350.19	4364.52	4381.23	4400.9	4424.27	4452.45	4486.96	4530.12	4585.6	4659.49	4332.13
10	0	0	0	0	0	0	0	0	0	0	0	0	0	0	0	0	0	0	0	0	0	0	0	0	0	0	0	0	0	0	0	0	0	0	0	0	0	0	0	0	0	0	0	0	0	0	0	0	0
11	0	0	0	0	0	0	0	0	0	0	0	0	0	0	0	0	0	0	0	0	0	6.53267	7.07706	7.56096	5.44389	6.96907	15.7085	26.2573	18.6439	11.0305	5.17591	3.87684	2.57776	1.27868	0	0	0	0	0	0	0	0	0	0	0	0	0	0	0
12	0	0	0	0	0	0	0	0	0	0	0	0	0	0	0	0	0	0	0	0	29.8901	33.5976	39.3808	53.1185	40.2195	53.3577	59.2981	50.5421	55.4154	59.6943	64.2668	68.9334	73.7008	78.5764	83.5678	88.6833	93.9317	99.3226	98.6379	98.1167	105.418	111.493	113.948	116.05	119.345	125.19	132.248	143.838	71.8546
13	0	0	0	0	0	0	0	0	0	0	0	0	0	0	0	0	0	0	0	0	0	0	0	0	0	0	0	0	0	0	0	0	0	0	0	0	0	0	0	0	0	0	0	0	0	0	0	0	0
14	0	0	0	0	0	0	0	0	0	0	0	0	0	0	0	0	0	0	0	0	0	0	0	0	0	0	0	0	0	0	0	0	0	0	0	0	0	0	0	0	0	0	0	0	0	0	0	0	0
15	0	0	0	0	0	0	0	0	0	0.172465	0	0	0	0	0	0	0	0	0	0	0	0	0	0	0	0	0	5.41329	0	0	0	0	0	0	0	0	0	0	0	0	0	0	0	0	0	0	0	0	0
16	0	0	0	0	0	0	0	0	0	0	0	0.117053	0.195168	0.322267	0.528073	0.794509	1.19896	1.96812	3.23909	5.20568	8.32908	7.22346	10.8352	11.2136	11.2136	14.4469	18.0587	20.4665	21.4022	22.338	23.2738	24.2095	25.1453	26.0811	27.0168	27.9526	28.8884	29.8241	8.46441	0	0	0	0	0	0	0	0	0	0
17	0	0	0	0	0	0	0	0	0	0	0	0	0	0	0	0	0	0	0	0	0	0	0	0	0	105.213	391.969	796.334	779.65	758.821	737.675	716.172	694.264	671.901	649.026	625.578	601.486	576.674	380.44	183.303	28.968	0	0	0	0	0	0	0	0
18	0	0	0	75.4348	143.755	273.63	260.094	493.788	936.095	1771.81	3347.9	3500.16	3665.98	4145.04	4618.48	5085.32	5544.76	5996.19	6439.14	6873.27	7298.34	7714.23	8120.87	8518.24	8906.43	9285.49	9655.59	11912	11706.9	11501.6	11295.9	11090	10883.9	10677.4	10470.6	10263.6	10056.3	9848.68	10564.6	13178.2	17348.5	21274.1	29087.8	38222.4	50104.3	62894.6	85433.2	89655.4	79293.1
19	0	0	0	0	0	43.1494	48.9523	55.242	61.9698	69.0498	76.3479	84.1921	96.1081	127.583	169.63	225.883	301.257	402.404	538.347	601	663.081	790.692	1048.57	783.059	910.917	1039.9	1301.62	1635.06	1735.26	1782.33	1838.54	1904.48	1980.82	2068.24	2167.49	2279.34	2404.66	2544.34	2481.14	2434.29	2175.59	1871.46	1620.22	1467.61	1314.92	1142.96	970.96	799.094	4058.27
20	0	0	6.19526	14.9923	36.2409	88.2991	16.307	38.5305	91.2305	134.157	3125.1	1705.21	606.875	319.036	427.677	524.023	781.476	580.575	461.136	551.18	512.779	5998.67	8080.52	3463.27	1544.95	1923.92	2655.43	2621.98	1661.89	2471.39	1965.85	2913.08	7447.14	8941.07	11237.7	19455.6	21737.6	18592.1	21478.3	17232.9	17502.5	15372.9	12482	5950.53	5155.05	5227.8	5391.48	5795.05	7305.58
21	0	0	0	0	0	37.0692	88.1496	203.28	463.545	1055.48	2507.13	2678.76	2857.34	3043.39	3237.52	3440.36	3652.6	3875.03	4108.49	4305.29	4483.34	5408.08	6343.24	7105.66	7771.62	8415.16	8409.25	9349.13	9499.5	9689.92	9886.23	10083.7	10282.5	10482.5	10683.8	10886.4	11090.4	11295.8	11422	11605.4	12650.2	14404	16162.7	18497.4	20833	24025.3	29568.7	43396.5	48410.3
22	0	0	0	0.60441	1.09578	1.98431	3.58879	6.48188	68.5825	184.121	387.617	402.86	431.381	459.13	486.067	512.159	537.396	561.807	585.622	608.899	632.15	695.369	759.085	825.35	1042.83	1278.06	1447	1696.76	1648.24	1599.58	1550.77	1501.8	1452.66	1474.96	1497.01	1518.77	1540.24	1561.39	1222.53	1270.43	1318.19	1365.79	1413.19	1723.47	2030.34	2336.33	2641.29	2945.06	6188.68
23	0	0	0	0	0	0	15.7918	34.2268	74.0747	160.063	345.279	477.839	653.437	1001.88	1331.35	1943.38	2517.56	3688.39	4343.09	4787.24	4229.29	4156.46	4287.13	4641.02	5568.49	6862.52	8698.91	12208.7	13034	12576.5	12114.1	11646.3	11172.9	10591	10005.7	9416.73	8823.52	8225.59	6566.24	4881.7	3169.96	1428.7	0	0	0	0	0	0	0
24	0	0	0	0	0	0	0	0	0	0	0	0	0	0	0	0	0	0	0	0	0	0	0	0	0	0.134784	0.303264	0.682344	0.841853	1.03809	1.27934	1.57566	1.93927	2.38499	2.93071	3.59796	4.41258	7.50018	7.89849	8.04352	8.35257	8.92656	10.5744	14.2809	17.5419	20.4764	25.3354	28.7182	70.9371
25	0	0	0	1.17893	2.94732	63.6445	89.9904	143.702	229.127	364.926	573.854	616.132	658.019	706.713	754.833	802.397	849.432	931.866	1013.37	1121.52	1228.17	1278.81	1344.04	1360.06	1551.54	1723.25	2357.51	3010.13	3040.41	3051.24	3063.12	3076.07	3090.09	3105.19	3121.39	3138.69	3157.11	3176.65	3468.71	4390.8	6585	8257.59	10411	13171.5	16860.8	21661.6	30144.3	35240	35714.3
26	0	0	0	0	0	0	0	0	0	0.101096	0.211654	0.629432	1.13249	2.14912	3.89365	7.21302	13.1395	24.019	44.0651	82.2021	146.946	207.075	267.723	329.151	388.448	355.708	432.109	515.418	458.853	465.557	472.471	479.617	487.019	494.71	502.722	511.1	519.893	529.161	547.52	557.352	568.062	594.1	623.292	657.559	685.29	716.081	750.73	790.476	802.021
27	0	0	0	0	0	0	0	0	0	0	0	0	0	0	0	0	0	0	0	0	0	0	0	0	0	0	0	0	0	0	0	0	0	0	0	0	0	0	0	0	0	0	0	0	0	0	0	0	0
Total	0	0	6.19526	92.2103	184.039	507.777	522.874	975.251	1927.58	3744.25	10369.6	9474	8981.68	9820.69	11052.4	12575.3	14253.2	16153.6	17696.9	19203.2	19678.6	26892.8	31137.2	28284.9	29532.5	33973.6	40215.3	51740.6	51605.8	51953	51000	51513.1	55627.2	56677	58545.6	66356.6	68256.8	64768.9	66666.5	64349.5	70077.2	73416.6	80787.8	88880.4	106437	127856	165554	190635	195221
Percentage rain fed rice area
region	-10000	-9000	-8000	-7000	-6000	-5000	-4000	-3000	-2000	-1000	0	100	200	300	400	500	600	700	800	900	1000	1100	1200	1300	1400	1500	1600	1700	1710	1720	1730	1740	1750	1760	1770	1780	1790	1800	1810	1820	1830	1840	1850	1860	1870	1880	1890	1900	1910
1	0	0	0	0	0	0	0	0	0	0	0	0	0	0	0	0	0	0	0	0	0	0	0	0	0	0	0	0	0	0	0	0	0	0	0	0	0	0	0	0	0	0	0	0	0	0	0	0	0
2	0	0	0	0	0	0	0	0	0	0	0	0	0	0	0	0	0	0	0	0	0	0	0	0	0	0	0	0	0	0	0	0	0	0	0	0	0	0	0	0	0	0	0	0	0	0	0	0	0
3	0	0	0	0	0	0	0	0	0	0	0	0	0	0	0	0	0	0	0	0	0	0	0	0	0	0	3.57593e-06	1.43037e-05	1.55041e-05	1.67045e-05	1.79048e-05	1.91052e-05	2.03056e-05	2.1506e-05	2.27063e-05	2.39067e-05	2.51071e-05	2.63075e-05	2.75078e-05	2.87082e-05	2.99086e-05	3.11089e-05	3.23093e-05	3.35097e-05	3.47101e-05	3.59104e-05	4.2372e-05	4.86872e-05	7.78142e-05
4	0	0	0	0	0	0	0	0	0	0	0	0	0	0	0	0	0	0	0	0	0	0	0	0	0	0	4.36274e-06	3.77758e-05	3.88557e-05	3.99799e-05	4.13818e-05	4.30377e-05	4.51569e-05	4.815e-05	5.26682e-05	6.11906e-05	7.60602e-05	0.000104705	0.000161399	0.000173033	0.000190303	0.000210274	0.000232881	0.000266111	0.000317867	0.000381173	0.000481807	0.000633735	0.000623258
5	0	0	0	0	0	0	0	0	0	0	0	0	0	0	0	0	0	0	0	0	0	0	0	0	0	0	0	0	0	0	0	0	0	0	0	0	0	1.18916e-08	3.04535e-08	7.48e-08	2.03534e-07	7.10342e-07	1.9247e-06	4.72254e-06	1.10306e-05	2.48977e-05	6.23466e-05	0.000151607	0.000295878
6	0	0	0	0	0	0	0	0	0	0	0	0	0	0	0	0	0	0	0	0	0	0	0	0	0	0	0	4.20561e-08	4.61385e-08	6.29922e-08	8.07179e-08	1.12236e-07	1.71451e-07	3.0052e-07	5.64283e-07	1.07244e-06	2.09868e-06	4.17789e-06	8.53096e-06	1.01809e-05	1.22684e-05	1.2953e-05	1.38478e-05	1.70581e-05	1.68279e-05	1.79782e-05	2.89513e-05	3.52238e-05	5.35993e-05
7	0	0	0	0	0	0	0	0	0	0	0	0	0	0	0	0	0	0	0	0	0	0	0	0	0	0	0	0	0	0	0	0	0	0	0	0	0	0	0	0	0	0	0	0	0	0	0	0	0
8	0	0	0	0	0	0	0	0	2.60343e-07	3.85504e-07	5.45364e-07	7.13378e-07	9.87826e-07	1.36039e-06	1.96215e-06	2.93797e-06	4.67906e-06	7.72521e-06	1.31594e-05	2.13586e-05	3.49033e-05	4.31388e-05	5.48156e-05	7.11114e-05	9.82212e-05	0.000140641	0.000207988	0.00031628	0.000317541	0.000318415	0.000319417	0.000320557	0.000322278	0.00032386	0.000325663	0.000327722	0.000330077	0.000332807	0.000336477	0.000340734	0.000345609	0.000351242	0.000357823	0.000365606	0.000377129	0.000392119	0.000412437	0.000442034	0.000473452
9	0	0	0	0	0	0	0	0	0	0	0	0	0	0	2.33765e-08	7.01296e-08	2.10389e-07	6.31166e-07	1.8935e-06	4.26037e-06	8.56364e-06	1.81838e-05	3.53103e-05	6.49828e-05	0.0001155	0.000224486	0.000410582	0.000725888	0.000731943	0.000732623	0.000733394	0.000734263	0.000735199	0.000736128	0.000737204	0.000738452	0.0007399	0.000741582	0.000743697	0.000746147	0.000749004	0.000752366	0.000756362	0.00076118	0.000767079	0.000774458	0.000783942	0.000796575	0.000740611
10	0	0	0	0	0	0	0	0	0	0	0	0	0	0	0	0	0	0	0	0	0	0	0	0	0	0	0	0	0	0	0	0	0	0	0	0	0	0	0	0	0	0	0	0	0	0	0	0	0
11	0	0	0	0	0	0	0	0	0	0	0	0	0	0	0	0	0	0	0	0	0	1.80205e-06	1.95222e-06	2.0857e-06	1.50171e-06	1.92243e-06	4.33321e-06	7.24312e-06	5.14295e-06	3.04279e-06	1.42778e-06	1.06943e-06	7.11078e-07	3.52725e-07	0	0	0	0	0	0	0	0	0	0	0	0	0	0	0
12	0	0	0	0	0	0	0	0	0	0	0	0	0	0	0	0	0	0	0	0	2.23463e-05	2.51181e-05	2.94417e-05	3.97123e-05	3.00687e-05	3.98911e-05	4.43322e-05	3.77861e-05	4.14295e-05	4.46285e-05	4.80469e-05	5.15357e-05	5.51e-05	5.8745e-05	6.24767e-05	6.63011e-05	7.02249e-05	7.42552e-05	7.37433e-05	7.33537e-05	7.88121e-05	8.33539e-05	8.51891e-05	8.67612e-05	8.92246e-05	9.35938e-05	9.88708e-05	0.000107535	5.37196e-05
13	0	0	0	0	0	0	0	0	0	0	0	0	0	0	0	0	0	0	0	0	0	0	0	0	0	0	0	0	0	0	0	0	0	0	0	0	0	0	0	0	0	0	0	0	0	0	0	0	0
14	0	0	0	0	0	0	0	0	0	0	0	0	0	0	0	0	0	0	0	0	0	0	0	0	0	0	0	0	0	0	0	0	0	0	0	0	0	0	0	0	0	0	0	0	0	0	0	0	0
15	0	0	0	0	0	0	0	0	0	4.43506e-08	0	0	0	0	0	0	0	0	0	0	0	0	0	0	0	0	0	1.39206e-06	0	0	0	0	0	0	0	0	0	0	0	0	0	0	0	0	0	0	0	0	0
16	0	0	0	0	0	0	0	0	0	0	0	7.0866e-09	1.18158e-08	1.95106e-08	3.19704e-08	4.81009e-08	7.25873e-08	1.19153e-07	1.961e-07	3.1516e-07	5.04256e-07	4.3732e-07	6.55981e-07	6.78888e-07	6.78888e-07	8.74641e-07	1.0933e-06	1.23907e-06	1.29573e-06	1.35238e-06	1.40903e-06	1.46569e-06	1.52234e-06	1.57899e-06	1.63564e-06	1.6923e-06	1.74895e-06	1.8056e-06	5.12449e-07	0	0	0	0	0	0	0	0	0	0
17	0	0	0	0	0	0	0	0	0	0	0	0	0	0	0	0	0	0	0	0	0	0	0	0	0	2.03388e-05	7.57717e-05	0.000153939	0.000150714	0.000146688	0.0001426	0.000138443	0.000134208	0.000129885	0.000125463	0.000120931	0.000116273	0.000111477	7.35431e-05	3.54344e-05	5.5998e-06	0	0	0	0	0	0	0	0
18	0	0	0	2.38405e-05	4.54324e-05	8.64784e-05	8.22004e-05	0.000156057	0.000295845	0.000559963	0.00105807	0.00110619	0.0011586	0.00131	0.00145963	0.00160717	0.00175237	0.00189504	0.00203503	0.00217224	0.00230658	0.00243802	0.00256653	0.00269212	0.0028148	0.0029346	0.00305156	0.00376467	0.00369987	0.00363497	0.00356998	0.00350491	0.00343975	0.00337449	0.00330915	0.00324372	0.0031782	0.00311259	0.00333885	0.00416484	0.00548284	0.00672348	0.00919293	0.0120799	0.015835	0.0198773	0.0270004	0.0283348	0.0250599
19	0	0	0	0	0	0.000182504	0.000207048	0.000233651	0.000262106	0.000292052	0.00032292	0.000356097	0.000406497	0.000539624	0.000717464	0.000955392	0.00127419	0.001702	0.00227698	0.00254198	0.00280455	0.0033443	0.00443503	0.00331201	0.0038528	0.00439833	0.00550532	0.00691561	0.00733944	0.00753853	0.00777625	0.00805517	0.00837804	0.00874779	0.00916755	0.00964068	0.0101707	0.0107615	0.0104942	0.010296	0.00920184	0.0079155	0.00685287	0.00620739	0.00556156	0.00483423	0.00410675	0.00337983	0.0171648
20	0	0	5.69092e-07	1.37718e-06	3.32906e-06	8.11109e-06	1.49795e-06	3.53938e-06	8.38037e-06	1.23235e-05	0.000287069	0.00015664	5.57472e-05	2.93064e-05	3.92861e-05	4.81363e-05	7.17859e-05	5.33312e-05	4.23596e-05	5.0631e-05	4.71036e-05	0.000551033	0.000742271	0.000318133	0.000141918	0.00017673	0.000243926	0.000240854	0.00015266	0.00022702	0.000180582	0.000267593	0.000684089	0.000821321	0.00103229	0.00178718	0.0019968	0.00170786	0.00197298	0.001583	0.00160777	0.00141214	0.00114659	0.000546612	0.00047354	0.000480222	0.000495258	0.000532329	0.000671085
21	0	0	0	0	0	1.43854e-05	3.42082e-05	7.88868e-05	0.000179888	0.000409601	0.000972942	0.00103955	0.00110885	0.00118105	0.00125638	0.0013351	0.00141747	0.00150378	0.00159438	0.00167075	0.00173985	0.00209871	0.00246162	0.00275749	0.00301593	0.00326567	0.00326338	0.00362811	0.00368647	0.00376037	0.00383655	0.00391319	0.00399032	0.00406794	0.00414606	0.00422469	0.00430386	0.00438358	0.00443252	0.00450369	0.00490917	0.00558975	0.00627227	0.00717828	0.00808464	0.00932349	0.0114747	0.0168409	0.0187866
22	0	0	0	2.50213e-07	4.5363e-07	8.2146e-07	1.48568e-06	2.68336e-06	2.83917e-05	7.62221e-05	0.000160465	0.000166775	0.000178582	0.00019007	0.000201221	0.000212023	0.00022247	0.000232576	0.000242435	0.000252071	0.000261696	0.000287868	0.000314245	0.000341677	0.00043171	0.000529091	0.000599028	0.000702424	0.000682337	0.000662192	0.000641985	0.000621713	0.000601369	0.000610603	0.000619728	0.000628738	0.000637625	0.000646381	0.000506099	0.000525929	0.000545703	0.000565408	0.000585028	0.000713479	0.000840516	0.000967188	0.00109344	0.00121919	0.00256198
23	0	0	0	0	0	0	3.74824e-05	8.12385e-05	0.000175819	0.000379914	0.00081953	0.00113417	0.00155095	0.00237799	0.00316001	0.00461268	0.00597551	0.00875451	0.0103085	0.0113627	0.0100384	0.0098655	0.0101756	0.0110156	0.013217	0.0162884	0.0206471	0.0289777	0.0309366	0.0298508	0.0287532	0.0276429	0.0265191	0.025138	0.0237489	0.0223509	0.0209429	0.0195237	0.0155852	0.0115869	0.00752401	0.00339107	0	0	0	0	0	0	0
24	0	0	0	0	0	0	0	0	0	0	0	0	0	0	0	0	0	0	0	0	0	0	0	0	0	1.67757e-08	3.77453e-08	8.49269e-08	1.0478e-07	1.29205e-07	1.59231e-07	1.96112e-07	2.41369e-07	2.96844e-07	3.64766e-07	4.47814e-07	5.49205e-07	9.33498e-07	9.83073e-07	1.00112e-06	1.03959e-06	1.11103e-06	1.31612e-06	1.77745e-06	2.18332e-06	2.54857e-06	3.15333e-06	3.57437e-06	8.82907e-06
25	0	0	0	6.39537e-07	1.59884e-06	3.45255e-05	4.88174e-05	7.79543e-05	0.000124295	0.000197963	0.000311301	0.000334236	0.000356958	0.000383373	0.000409477	0.000435279	0.000460794	0.000505513	0.000549728	0.000608397	0.000666252	0.000693722	0.000729104	0.000737795	0.000841668	0.000934816	0.00127889	0.00163292	0.00164934	0.00165522	0.00166166	0.00166869	0.00167629	0.00168448	0.00169327	0.00170266	0.00171265	0.00172325	0.00188169	0.00238189	0.00357219	0.00447953	0.00564767	0.00714522	0.00914654	0.0117508	0.0163525	0.0191168	0.0193741
26	0	0	0	0	0	0	0	0	0	1.8052e-08	3.77936e-08	1.12393e-07	2.02221e-07	3.83754e-07	6.95262e-07	1.28798e-06	2.34623e-06	4.28891e-06	7.8684e-06	1.46782e-05	2.62392e-05	3.69758e-05	4.78053e-05	5.87742e-05	6.93624e-05	6.35163e-05	7.71587e-05	9.20346e-05	8.19341e-05	8.31313e-05	8.43659e-05	8.56418e-05	8.69636e-05	8.83368e-05	8.97675e-05	9.12635e-05	9.28336e-05	9.44885e-05	9.77668e-05	9.95225e-05	0.000101435	0.000106084	0.000111297	0.000117416	0.000122367	0.000127866	0.000134053	0.00014115	0.000143211
27	0	0	0	0	0	0	0	0	0	0	0	0	0	0	0	0	0	0	0	0	0	0	0	0	0	0	0	0	0	0	0	0	0	0	0	0	0	0	0	0	0	0	0	0	0	0	0	0	0
Total	0	0	4.75208e-08	7.07301e-07	1.41167e-06	3.89491e-06	4.01071e-06	7.48067e-06	1.47855e-05	2.87203e-05	7.95403e-05	7.26704e-05	6.88941e-05	7.53297e-05	8.47775e-05	9.64589e-05	0.000109329	0.000123907	0.000135745	0.000147298	0.000150945	0.000206281	0.000238838	0.00021696	0.00022653	0.000260595	0.000308472	0.000396877	0.000395843	0.000398506	0.000391196	0.000395132	0.000426689	0.000434742	0.000449075	0.000508989	0.000523565	0.000496811	0.000511366	0.000493594	0.000537528	0.000563143	0.000619683	0.000681758	0.000816425	0.000980724	0.00126988	0.00146227	0.00149744
Rain fed rice area per capita (ha/cap)
region	-10000	-9000	-8000	-7000	-6000	-5000	-4000	-3000	-2000	-1000	0	100	200	300	400	500	600	700	800	900	1000	1100	1200	1300	1400	1500	1600	1700	1710	1720	1730	1740	1750	1760	1770	1780	1790	1800	1810	1820	1830	1840	1850	1860	1870	1880	1890	1900	1910
1	0	0	0	0	0	0	0	0	0	0	0	0	0	0	0	0	0	0	0	0	0	0	0	0	0	0	0.00347417	0.0138967	0.0132547	0.0122813	0.011288	0.0102999	0.009337	0.00841414	0.00754197	0.00672745	0.00597452	0.00528471	0.00465759	0.00405654	0.00351893	0.00304088	0.00261823	0.00191639	0.00173271	0.00153804	0.00161456	0.00171675	0.00208865
2	0	0	0	0	0	0	0	0	0	0	0	0	0	0	0	0	0	0	0	0	0	0	0	0	0	0	0.000411959	0.00299536	0.00208065	0.00161615	0.00134352	0.00116746	0.00105193	0.000982825	0.000956658	0.0010012	0.00113216	0.00121913	0.00145127	0.00120019	0.00101092	0.000858066	0.000719595	0.000613466	0.000599743	0.000553979	0.000561065	0.000611263	0.000500169
3	0	0	0	0	0	0	0	0	0	0	0	0	0	0	0	0	0	0	0	0	0	0	0	0	0	0	0	0	0	0	0	0	0	0	0	0	0	1.36472e-06	3.34241e-06	7.86636e-06	2.05456e-05	6.89385e-05	0.000179852	0.000425485	0.00095945	0.00209324	0.00444236	0.00940123	0.016478
4	0	0	0	0	0	0	0	0	0	0	0	0	0	0	0	0	0	0	0	0	0	0	0	0	0	0	0	2.35554e-05	2.47799e-05	3.22775e-05	3.92438e-05	5.14665e-05	7.36754e-05	0.000120181	0.000208451	0.000361253	0.000640651	0.00114816	0.00208827	0.00224699	0.00234039	0.00219896	0.00207739	0.00232149	0.00205919	0.00197425	0.00284905	0.0030937	0.00395333
5	0	0	0	0	0	0	0	0	0	0	0	0	0	0	0	0	0	0	0	0	0	0	0	0	0	0	0	0	0	0	0	0	0	0	0	0	0	0	0	0	0	0	0	0	0	0	0	0	0
6	0	0	0	0	0	0	0	0	0.000117276	0.000143518	0.000165968	0.000203898	0.000265255	0.00034313	0.000464848	0.000653612	0.000977389	0.00151473	0.00242128	0.00355538	0.00530299	0.00597222	0.00697154	0.00835837	0.0107302	0.0143511	0.0429824	0.0670994	0.06619	0.0652136	0.0642786	0.0633859	0.0626204	0.0618365	0.0611041	0.0604267	0.0598085	0.0592601	0.0587499	0.0554113	0.0476076	0.0423287	0.0370604	0.0322005	0.0298571	0.0265714	0.0225239	0.0207575	0.0185765
7	0	0	0	0	0	0	0	0	0	0	0	0	0	0	1.61859e-06	5.14681e-06	1.64099e-05	4.62309e-05	0.000128341	0.000260541	0.000477071	0.00111963	0.0023207	0.00392067	0.00792952	0.01582	0.0218326	0.0456527	0.0459243	0.0456151	0.0453134	0.0450182	0.0447276	0.044436	0.0441529	0.0438786	0.0436143	0.0433594	0.041089	0.0389331	0.034795	0.0314887	0.0287948	0.0282576	0.0257037	0.0235155	0.0201054	0.0180426	0.0152242
8	0	0	0	0	0	0	0	0	0	0	0	0	0	0	0	0	0	0	0	0	0	0	0	0	0	0	0	0	0	0	0	0	0	0	0	0	0	0	0	0	0	0	0	0	0	0	0	0	0
9	0	0	0	0	0	0	0	0	0	0	0	0	0	0	0	0	0	0	0	0	0	7.33145e-05	7.37543e-05	7.23383e-05	4.81362e-05	5.6889e-05	0.000117251	0.000180522	0.000126324	7.38361e-05	3.42166e-05	2.53011e-05	1.66008e-05	8.12214e-06	0	0	0	0	0	0	0	0	0	0	0	0	0	0	0
10	0	0	0	0	0	0	0	0	0	0	0	0	0	0	0	0	0	0	0	0	0.0115838	0.0108506	0.0109015	0.0128664	0.00865947	0.0103393	0.00984907	0.00587652	0.00656715	0.00721298	0.00792094	0.00866963	0.0094625	0.0103032	0.0111961	0.0121457	0.013157	0.0142359	0.0144745	0.0147493	0.0162434	0.0176201	0.0152991	0.0126387	0.00979978	0.00519465	0.00447057	0.00348614	0.00129821
11	0	0	0	0	0	0	0	0	0	0	0	0	0	0	0	0	0	0	0	0	0	0	0	0	0	0	0	0	0	0	0	0	0	0	0	0	0	0	0	0	0	0	0	0	0	0	0	0	0
12	0	0	0	0	0	0	0	0	0	0	0	0	0	0	0	0	0	0	0	0	0	0	0	0	0	0	0	0	0	0	0	0	0	0	0	0	0	0	0	0	0	0	0	0	0	0	0	0	0
13	0	0	0	0	0	0	0	0	0	3.83256e-06	0	0	0	0	0	0	0	0	0	0	0	0	0	0	0	0	0	6.36859e-05	0	0	0	0	0	0	0	0	0	0	0	0	0	0	0	0	0	0	0	0	0
14	0	0	0	0	0	0	0	0	0	0	0	1.77721e-05	2.74897e-05	4.21755e-05	6.43003e-05	9.13612e-05	0.000130115	0.000199001	0.00030543	0.000458143	0.000687218	0.00039733	0.000397329	0.000411204	0.000411204	0.00039733	0.000397328	0.00033773	0.00032467	0.000319149	0.000313132	0.000306697	0.000299908	0.000292828	0.000285509	0.000278004	0.000270359	0.000262614	7.01166e-05	0	0	0	0	0	0	0	0	0	0
15	0	0	0	0	0	0	0	0	0	0	0	0	0	0	0	0	0	0	0	0	0	0	0	0	0	0.00300602	0.00979897	0.0177353	0.0167552	0.0158064	0.0148806	0.0139782	0.0130997	0.0122455	0.011416	0.010611	0.00983071	0.00907492	0.00576007	0.00266825	0.000405119	0	0	0	0	0	0	0	0
16	0	0	0	0.0151159	0.0246911	0.0402839	0.0328208	0.053408	0.0867812	0.140783	0.22799	0.213629	0.202528	0.208934	0.213763	0.232163	0.248921	0.246885	0.242623	0.242274	0.241668	0.170295	0.121754	0.119657	0.129682	0.105388	0.08818	0.0955668	0.0874507	0.0771723	0.0687614	0.0617494	0.055813	0.0507233	0.0463089	0.0424453	0.0390333	0.035999	0.0364719	0.0425969	0.0524082	0.0547072	0.0690366	0.0793796	0.0959884	0.105182	0.124867	0.116982	0.0838854
17	0	0	0	0	0	0.0035369	0.00233479	0.001764	0.00134955	0.00106969	0.000765	0.000738245	0.000727867	0.000825025	0.0011405	0.00154812	0.00206027	0.00281439	0.00381653	0.004113	0.00510422	0.0061258	0.00803533	0.00684388	0.00841423	0.0090503	0.009568	0.0128212	0.0133512	0.013527	0.0137622	0.0140582	0.014417	0.0148403	0.0153298	0.0158875	0.0165155	0.0172155	0.0164913	0.0158834	0.0136036	0.0112351	0.00934734	0.00814317	0.00699093	0.00548037	0.00424504	0.00326768	0.0155887
18	0	0	0.00188041	0.00230892	0.00283196	0.00350097	0.000328061	0.000393305	0.000472504	0.000352551	0.00416692	0.00216541	0.000735628	0.000369906	0.000475211	0.00055897	0.000801536	0.00057342	0.000439186	0.000506844	0.000455814	0.00516024	0.00673387	0.00279866	0.00121174	0.00146587	0.00196699	0.00158909	0.000985321	0.00143409	0.00111697	0.00162139	0.00406212	0.00478137	0.00589394	0.0100116	0.0109786	0.00921932	0.0104604	0.00840636	0.00810311	0.00725139	0.00538022	0.00243875	0.0020137	0.00203258	0.0019281	0.00203692	0.00276676
19	0	0	0	0	0	0.0563393	0.107179	0.19773	0.360711	0.657067	1.2486	1.00537	0.807117	0.646191	0.51605	0.411158	0.326884	0.25937	0.205424	0.191346	0.179334	0.180269	0.158581	0.236855	0.222046	0.210379	0.168185	0.149586	0.138277	0.132482	0.126947	0.121601	0.116441	0.111464	0.106667	0.102045	0.0975945	0.0933121	0.0885671	0.0844639	0.0908238	0.10311	0.115358	0.13084	0.146053	0.167636	0.204981	0.298888	0.32785
20	0	0	0	5.69038e-05	6.24687e-05	6.83735e-05	7.4634e-05	8.12622e-05	0.000517823	0.00137537	0.000664064	0.000777291	0.000989668	0.00205543	0.00159247	0.00135676	0.00106109	0.00133211	0.00175848	0.00151544	0.00169164	0.000760882	0.000726328	0.00101908	0.00144748	0.00138813	0.00146362	0.00167943	0.00155814	0.00131874	0.00120292	0.00103639	0.000805552	0.000740724	0.000673453	0.00054647	0.000511617	0.000530308	0.000354932	0.000357533	0.000337083	0.000330183	0.000327082	0.000405614	0.000562197	0.000639222	0.000700522	0.000732591	0.00145422
21	0	0	0	0	0	0	0.00372591	0.00586537	0.00941103	0.0105507	0.0132214	0.0168145	0.0212176	0.0301181	0.0371468	0.0504146	0.0607759	0.0828513	0.0906594	0.0943765	0.0789871	0.0634833	0.0553788	0.055684	0.0581406	0.0634281	0.0682962	0.0824647	0.0849087	0.0789789	0.0734257	0.0682116	0.0632999	0.0581008	0.0531988	0.0485667	0.0441794	0.0400139	0.0302901	0.0214113	0.0128358	0.00533578	0	0	0	0	0	0	0
22	0	0	0	0	0	0	0	0	0	0	0	0	0	0	0	0	0	0	0	0	0	0	0	0	0	1.48783e-06	3.06568e-06	6.21191e-06	7.58985e-06	9.26931e-06	1.13147e-05	1.38041e-05	1.68309e-05	1.98256e-05	2.33751e-05	2.75799e-05	3.25565e-05	5.33377e-05	5.34773e-05	5.19222e-05	5.15125e-05	5.26969e-05	5.98574e-05	6.4636e-05	6.61706e-05	6.62101e-05	7.16836e-05	7.22276e-05	0.000149093
23	0	0	0	0.00671436	0.0111906	0.161101	0.151859	0.161664	0.171845	0.182464	0.191284	0.123227	0.094003	0.0642467	0.0503222	0.0356622	0.0283144	0.0207082	0.018425	0.0175239	0.0204696	0.020626	0.0210006	0.0186309	0.0166832	0.0140101	0.0138678	0.0112739	0.0104842	0.0105215	0.0105625	0.0106071	0.0106555	0.0107819	0.010914	0.0110517	0.0111954	0.0113452	0.0120441	0.0148338	0.0216612	0.0264667	0.0325343	0.0397051	0.0490896	0.0588519	0.0752158	0.0787059	0.0709065
24	0	0	0	0	0	0	0	0	0	3.87242e-05	7.98613e-05	0.000236045	0.00042183	0.000794517	0.00142753	0.00262019	0.0047242	0.00853726	0.0154622	0.0284292	0.0499912	0.0691312	0.0831045	0.0982931	0.112336	0.084736	0.086748	0.0893778	0.0802579	0.0805856	0.0808545	0.081058	0.0811897	0.0812399	0.0811989	0.0810539	0.0807317	0.0802009	0.0835428	0.0811934	0.0753996	0.0678453	0.0519449	0.0345243	0.026708	0.0224823	0.0176445	0.0155936	0.0134921
25	0	0	0	0	0	0	0	0	0	0	0	0	0	0	0	0	0	0	0	0	0	0	0	0	0	0	0	0	0	0	0	0	0	0	0	0	0	0	0	0	0	0	0	0	0	0	0	0	0
26	0	0	0	0	0	0	0	0	0	0	0	0	0	0	0	0	0	0	0	0	0	0	0	0	0	0	0	0	0	0	0	0	0	0	0	0	0	0	0	0	0	0	0	0	0	0	0	0	0
27	0	0	0	0	0	0	0	0	0	0	0	0	0	0	0	0	0	0	0	0	0	0	0	0	0	0	0	0	0	0	0	0	0	0	0	0	0	0	0	0	0	0	0	0	0	0	0	0	0
Total	0	0	0	0	0	0	0	0	0	0	0	0	0	0	0	0	0	0	0	0	0	0	0	0	0	0	0	0	0	0	0	0	0	0	0	0	0	0	0	0	0	0	0	0	0	0	0	0	0
in km2	-10000	-9000	-8000	-7000	-6000	-5000	-4000	-3000	-2000	-1000	0	100	200	300	400	500	600	700	800	900	1000	1100	1200	1300	1400	1500	1600	1700	1710	1720	1730	1740	1750	1760	1770	1780	1790	1800	1810	1820	1830	1840	1850	1860	1870	1880	1890	1900	1910
North America	0	0	0	0	0	0	0	0	0	0	0	0	0	0	0	0	0	0	0	0	0	0	0	0	0	0	0	0	0	0	0	0	0	0	0	0	0	0	0	0	0	0	0	0	0	0	0	0	0
Latin America	0	0	0	0	0	0	0	0	0	0	0	0	0	0	0	0	0	0	0	0	0	0	0	0	0	0	10.1555	55.9492	59.113	62.4267	65.9525	69.7916	74.2258	79.9439	88.0204	101.285	123.974	166.561	250.708	277.12	312.408	339.988	377.41	457.278	548.801	725.314	1228.81	2163.99	3599.71
Europe	0	0	0	0	0	0	0	0	0	0	0	0	0	0	0	0	0	0	0	0	29.8901	40.1303	46.4579	60.6795	45.6634	60.3268	75.0065	76.7994	74.0593	70.7248	69.4427	72.8102	76.2786	79.8551	83.5678	88.6833	93.9317	99.3226	98.6379	98.1167	105.418	111.493	113.948	116.05	119.345	125.19	132.248	143.838	71.8546
USSR	0	0	0	0	0	0	0	0	0	0.172465	0	0.117053	0.195168	0.322267	0.528073	0.794509	1.19896	1.96812	3.23909	5.20568	8.32908	7.22346	10.8352	11.2136	11.2136	14.4469	18.0587	25.8797	21.4022	22.338	23.2738	24.2095	25.1453	26.0811	27.0168	27.9526	28.8884	29.8241	8.46441	0	0	0	0	0	0	0	0	0	0
N.Africa_M.East	0	0	0	0	0	0	0	0	0	0	0	0	0	0	0	0	0	0	0	0	0	0	0	0	0	105.213	391.969	796.334	779.65	758.821	737.675	716.172	694.264	671.901	649.026	625.578	601.486	576.674	380.44	183.303	28.968	0	0	0	0	0	0	0	0
Tropical Africa	0	0	0	0	0	0	0	0	2.95497	4.47668	6.40169	8.72648	12.3446	17.59	26.3014	40.9701	67.4789	115.394	204.504	349.549	593.202	803.078	1096.44	1516.4	2178.9	3265.13	5194.49	8351.31	8344.48	8365.07	8387.87	8413.04	8445.46	8476.53	8511.3	8550.35	8594.34	8644.44	8716.82	8789.31	8872.05	8981.69	9108.96	9259.75	9452.77	9696.88	10017.6	10467.2	10508
China	0	0	6.19526	14.9923	36.2409	131.449	65.2593	93.7725	153.2	203.206	3201.45	1789.4	702.984	446.62	597.307	749.906	1082.73	982.978	999.484	1152.18	1175.86	6789.36	9129.09	4246.33	2455.86	2963.82	3957.06	4257.04	3397.16	4253.72	3804.39	4817.56	9427.95	11009.3	13405.2	21734.9	24142.2	21136.4	23959.5	19667.2	19678.1	17244.4	14102.2	7418.15	6469.97	6370.76	6362.44	6594.14	11363.9
South Asia	0	0	0	75.4348	143.755	273.63	260.094	493.788	936.095	1771.81	3347.9	3500.16	3665.98	4145.04	4618.48	5085.32	5544.76	5996.19	6439.14	6873.27	7298.34	7714.23	8120.87	8518.24	8906.43	9285.49	9655.59	11912	11706.9	11501.6	11295.9	11090	10883.9	10677.4	10470.6	10263.6	10056.3	9848.68	10564.6	13178.2	17348.5	21274.1	29087.8	38222.4	50104.3	62894.6	85433.2	89655.4	79293.1
SE Asia	0	0	0	1.78334	4.0431	102.698	181.729	353.463	761.254	1604.53	3468.6	3697.75	3946.74	4209.24	4478.42	4754.91	5039.43	5368.71	5707.48	6035.71	6343.67	7382.27	8446.36	9291.06	10366	11416.5	12213.8	14056	14188.2	14340.7	14500.1	14661.6	14825.2	15062.6	15302.2	15543.9	15787.8	16033.9	16113.2	17266.6	20553.4	24027.4	27986.9	33392.4	39724.1	48023.2	62354.2	81581.5	90313.3
Pacific Dev.	0	0	0	0	0	0	15.7918	34.2268	74.0747	160.063	345.279	477.839	653.437	1001.88	1331.35	1943.38	2517.56	3688.39	4343.09	4787.24	4229.29	4156.46	4287.13	4641.02	5568.49	6862.65	8699.21	12209.4	13034.8	12577.6	12115.4	11647.9	11174.8	10593.4	10008.7	9420.33	8827.93	8233.09	6574.14	4889.74	3178.32	1437.63	10.5744	14.2809	17.5419	20.4764	25.3354	28.7182	70.9371
Total	0	0	6.19526	92.2103	184.039	507.777	522.874	975.251	1927.58	3744.25	10369.6	9474	8981.68	9820.69	11052.4	12575.3	14253.2	16153.6	17696.9	19203.2	19678.6	26892.8	31137.2	28284.9	29532.5	33973.6	40215.3	51740.6	51605.8	51953	51000	51513.1	55627.2	56677	58545.6	66356.6	68256.8	64768.9	66666.5	64349.5	70077.2	73416.6	80787.8	88880.4	106437	127856	165554	190635	195221
check	#DIV/0!	#DIV/0!	1	1	1	1	1	1	1	1	1	1	1	1	1	1	1	1	1	1	1	1	1	1	1	1	1	1	1	1	1	1	1	1	1	1	1	1	1	1	1	1	1	1	1	1	1	1	1
in Mha	-10000	-9000	-8000	-7000	-6000	-5000	-4000	-3000	-2000	-1000	0	100	200	300	400	500	600	700	800	900	1000	1100	1200	1300	1400	1500	1600	1700	1710	1720	1730	1740	1750	1760	1770	1780	1790	1800	1810	1820	1830	1840	1850	1860	1870	1880	1890	1900	1910
North America	0	0	0	0	0	0	0	0	0	0	0	0	0	0	0	0	0	0	0	0	0	0	0	0	0	0	0	0	0	0	0	0	0	0	0	0	0	0	0	0	0	0	0	0	0	0	0	0	0
Latin America	0	0	0	0	0	0	0	0	0	0	0	0	0	0	0	0	0	0	0	0	0	0	0	0	0	0	0.00101555	0.00559492	0.0059113	0.00624267	0.00659525	0.00697916	0.00742258	0.00799439	0.00880204	0.0101285	0.0123974	0.0166561	0.0250708	0.027712	0.0312408	0.0339988	0.037741	0.0457278	0.0548801	0.0725314	0.122881	0.216399	0.359971
Europe	0	0	0	0	0	0	0	0	0	0	0	0	0	0	0	0	0	0	0	0	0.00298901	0.00401303	0.00464579	0.00606795	0.00456634	0.00603268	0.00750065	0.00767994	0.00740593	0.00707248	0.00694427	0.00728102	0.00762786	0.00798551	0.00835678	0.00886833	0.00939317	0.00993226	0.00986379	0.00981167	0.0105418	0.0111493	0.0113948	0.011605	0.0119345	0.012519	0.0132248	0.0143838	0.00718546
USSR	0	0	0	0	0	0	0	0	0	1.72465e-05	0	1.17053e-05	1.95168e-05	3.22267e-05	5.28073e-05	7.94509e-05	0.000119896	0.000196812	0.000323909	0.000520568	0.000832908	0.000722346	0.00108352	0.00112136	0.00112136	0.00144469	0.00180587	0.00258797	0.00214022	0.0022338	0.00232738	0.00242095	0.00251453	0.00260811	0.00270168	0.00279526	0.00288884	0.00298241	0.000846441	0	0	0	0	0	0	0	0	0	0
N.Africa_M.East	0	0	0	0	0	0	0	0	0	0	0	0	0	0	0	0	0	0	0	0	0	0	0	0	0	0.0105213	0.0391969	0.0796334	0.077965	0.0758821	0.0737675	0.0716172	0.0694264	0.0671901	0.0649026	0.0625578	0.0601486	0.0576674	0.038044	0.0183303	0.0028968	0	0	0	0	0	0	0	0
Tropical Africa	0	0	0	0	0	0	0	0	0.000295497	0.000447668	0.000640169	0.000872648	0.00123446	0.001759	0.00263014	0.00409701	0.00674789	0.0115394	0.0204504	0.0349549	0.0593202	0.0803078	0.109644	0.15164	0.21789	0.326513	0.519449	0.835131	0.834448	0.836507	0.838787	0.841304	0.844546	0.847653	0.85113	0.855035	0.859434	0.864444	0.871682	0.878931	0.887205	0.898169	0.910896	0.925975	0.945277	0.969688	1.00176	1.04672	1.0508
China	0	0	0.000619526	0.00149923	0.00362409	0.0131449	0.00652594	0.00937725	0.01532	0.0203206	0.320145	0.17894	0.0702984	0.044662	0.0597307	0.0749906	0.108273	0.0982978	0.0999484	0.115218	0.117586	0.678936	0.912909	0.424633	0.245586	0.296382	0.395706	0.425704	0.339716	0.425372	0.380439	0.481756	0.942796	1.10093	1.34052	2.17349	2.41422	2.11364	2.39595	1.96672	1.96781	1.72444	1.41022	0.741815	0.646997	0.637076	0.636244	0.659414	1.13639
South Asia	0	0	0	0.00754348	0.0143755	0.027363	0.0260094	0.0493788	0.0936095	0.177181	0.33479	0.350016	0.366598	0.414504	0.461848	0.508532	0.554476	0.599619	0.643914	0.687327	0.729834	0.771423	0.812087	0.851824	0.890643	0.928549	0.965559	1.1912	1.17069	1.15016	1.12959	1.109	1.08838	1.06774	1.04706	1.02636	1.00563	0.984868	1.05646	1.31782	1.73485	2.12741	2.90877	3.82224	5.01044	6.28946	8.54332	8.96554	7.92931
SE Asia	0	0	0	0.000178334	0.00040431	0.0102698	0.0181729	0.0353463	0.0761254	0.160453	0.34686	0.369775	0.394674	0.420924	0.447842	0.475491	0.503943	0.536871	0.570748	0.603571	0.634367	0.738227	0.844636	0.929106	1.0366	1.14165	1.22138	1.4056	1.41882	1.43407	1.45001	1.46616	1.48252	1.50626	1.53022	1.55439	1.57878	1.60339	1.61132	1.72666	2.05534	2.40274	2.79869	3.33924	3.97241	4.80232	6.23542	8.15815	9.03133
Pacific Dev.	0	0	0	0	0	0	0.00157918	0.00342268	0.00740747	0.0160063	0.0345279	0.0477839	0.0653437	0.100188	0.133135	0.194338	0.251756	0.368839	0.434308	0.478724	0.422929	0.415646	0.428713	0.464102	0.556849	0.686265	0.869921	1.22094	1.30348	1.25776	1.21154	1.16479	1.11748	1.05934	1.00087	0.942033	0.882793	0.823309	0.657414	0.488974	0.317832	0.143763	0.00105744	0.00142809	0.00175419	0.00204764	0.00253354	0.00287182	0.00709371
Total	0	0	0.000619526	0.00922103	0.0184039	0.0507777	0.0522874	0.0975251	0.192758	0.374425	1.03696	0.9474	0.898168	0.982069	1.10524	1.25753	1.42532	1.61536	1.76969	1.92032	1.96786	2.68928	3.11372	2.82849	2.95325	3.39736	4.02153	5.17406	5.16058	5.1953	5.1	5.15131	5.56272	5.6677	5.85456	6.63566	6.82568	6.47689	6.66665	6.43495	7.00772	7.34166	8.07878	8.88804	10.6437	12.7856	16.5554	19.0635	19.5221
[truncated: 25 more columns]

## Sheet: ir_norice
Irrigated cropland (no rice) land area (in 1000 km2)
region	-10000	-9000	-8000	-7000	-6000	-5000	-4000	-3000	-2000	-1000	0	100	200	300	400	500	600	700	800	900	1000	1100	1200	1300	1400	1500	1600	1700	1710	1720	1730	1740	1750	1760	1770	1780	1790	1800	1810	1820	1830	1840	1850	1860	1870	1880	1890	1900	1910
1	0	0	0	0	0	0	0	0	0	0	0	0	0	0	0	0	0	0	0	0	0	0	0	0	0	0	0	0	0	0	0	0	0	0	0	0	0	0	32.3998	64.8	97.2	129.6	162	194.4	226.8	259.2	291.6	324	674.932
2	0	0	0	0	0	0	0	0	0	0	0	0	0	0	0	0	0	0	41.434	46.7726	52.1395	56.5514	62.9808	68.6328	76.7456	84.3669	39.8899	50.57	62.1987	73.8274	85.4561	97.085	108.714	120.342	131.971	143.6	155.228	166.644	3300.81	6435.96	9568.86	12698.1	15817.5	18909.6	21945.6	24812.5	27294.9	30059.4	49127.5
3	0	0	0	0	0	0	0	0	0	0	533.807	574.567	618.442	665.667	716.499	771.213	830.106	893.497	961.73	1130.65	1306.04	1510.33	1722.39	1942.47	2170.81	2407.64	66.6086	274.462	344.266	414.069	483.873	553.677	623.481	693.284	763.088	832.893	902.696	972.499	1620.34	2268.17	2916.01	3563.84	4211.68	4859.52	5507.36	6155.19	6756.46	7359.02	9697.85
4	0	0	0	0	0	0	0	0	0	0	0	0	0	0	0	0	0	0	15.2414	22.2286	28.7422	29.6392	30.3287	30.7789	30.9471	30.7727	21.5469	34.4035	38.1219	41.8402	45.5585	49.2769	52.8541	56.2728	59.5229	62.1285	63.7651	63.5412	112.961	165.427	218.803	272.05	320.678	377.377	428.665	479.455	526.515	504.01	889.462
5	0	0	0	0	0	0	0	0	0	0	0	0.00261174	0.00321573	0.00321469	0.0039522	0.00485499	0.00595827	0.0073044	0.00708437	0.00866303	0.0105775	0.0113542	0.00892343	0.0101005	0.0111649	0.00868075	0.0510876	0.287368	0.356724	0.427546	0.464589	0.535923	0.606	0.676984	0.765842	0.815448	0.888232	0.852393	1.07704	1.05817	0.55763	0.614667	0.702643	0.736921	0.825889	0.929136	1.04858	1.11371	82.7176
6	0	0	0	0	0	0	0	0	0	348.9	612.988	659.482	693.207	728.835	766.234	805.46	846.61	909.307	955.715	1054.59	1133.7	1190.58	1238.97	1287.62	1324.2	1381.34	914.961	907.41	1031.94	1157.25	1282.14	1407.07	1531.86	1656.66	1781.31	1905.76	2029.51	2152.22	3284.28	4418.68	5550.5	6680.59	7807.88	8930.33	10047.9	11154	12228.8	13286.6	15122.4
7	0	0	0	0	345.664	1551.17	7000	8000	8445.79	8891.6	10419	11005.7	11609.5	12198.8	12788.5	13410	13770.2	14584.6	15185.8	15759.3	16334.3	14023.7	11865.3	12606.3	9828.84	8680.69	9575.82	7383.99	7209.39	7038.22	6871.68	6710.85	6554.72	6404.2	6258.65	6118.26	5983.07	5853.05	6495.11	7116.43	7715.3	8293.46	8850.88	8284.26	9148.62	10081.6	12709	14992.5	16997
8	0	0	0	0	0	0	0	0	0	0	0	0	0	0	0	18.0181	22.5852	28.3092	35.4832	44.4743	55.7425	82.2701	98.0962	138.183	155.477	177.677	205.5	263.281	274.104	284.615	294.939	305.01	314.182	323.83	333.123	341.909	350.027	357.952	361.182	365.356	367.12	367.421	365.835	361.793	354.523	343.534	331.402	327.589	648.108
9	0	0	0	0	0	0	0	0	0	0	121.731	126.13	130.686	135.404	140.289	145.347	150.585	174.718	184.494	197.365	210.296	217.025	223.782	241.06	258.418	277.651	297.662	349.947	387.944	448.948	509.953	570.957	632.033	693.407	754.763	816.105	877.461	939.265	1114.52	1258.25	1401.79	1545.53	1689.11	1832.64	1976.16	2119.64	2263.09	2409.11	3459.28
10	0	0	0	0	0	0	0	0	0	0	0	0	0	0	0	0	0	0	0	0	0	0	0	0	0	0	17.9865	51.3734	61.441	71.462	81.5147	91.5944	101.646	111.697	121.748	131.799	141.85	151.901	540.711	929.52	1318.33	1707.14	2095.95	2484.76	2873.57	3262.38	3651.19	4040.01	4713.33
11	0	0	0	0	0	0	0	0	0	0	374.434	447.656	1076.47	985.239	884.216	653.391	468.533	556.23	638.309	689.039	570.797	625.854	824.766	839.826	695.543	852.796	953.018	1019.95	1142	1278.22	1417.22	1558.04	1698.94	1840.12	1979.99	2120.49	2260.32	2399.45	4849.94	7310.36	9743.14	12185.7	14604.3	17017.6	19467.2	21879.4	23100.9	25907.7	32164.9
12	0	0	0	0	0	0	0	0	0	0	0	0	0	0	0	0	0	0	0	0	0	0	0	0	0	0	0	21.5163	23.1759	25.4899	27.9709	30.4114	32.8095	35.1631	37.4701	39.7282	42.039	44.1981	93.3525	142.447	191.955	240.704	289.362	338.94	388.517	427.973	471.728	523.421	869.722
13	0	0	0	5.51559	16.5468	104.796	171.715	233.702	448.701	639.053	791.872	849.659	905.89	831.591	758.256	685.676	613.631	662.709	707.09	759.288	801.574	558.204	614.562	638.895	497.584	515.645	628.354	626.364	686.613	746.332	806.014	865.658	925.263	984.828	1044.35	1103.84	1163.28	1222.68	1471.98	1721.24	1965.55	2210.28	2454.75	2698.95	2942.87	3189.65	3436.69	3683.63	4449.65
14	0	0	0	0	0	0	0	0	0	0	0	0	0	0	0	0	0	0	0	0	0	0	0	0	0	0	0	8.0501	10.0017	11.9532	13.9048	15.8563	17.9103	19.8707	21.8311	23.7915	25.7519	27.7123	55.9325	84.1528	112.373	130.775	161.69	197.034	221.957	252.878	279.652	309.915	1036.77
15	0	0	0	0	0	0	0	0	0	0	438.723	581.651	620.701	661.95	705.419	751.067	798.521	847.193	904.276	924.729	936.619	1004.44	1074.34	1141.55	1208.61	1284.32	1452.19	1603.21	1923.79	2251.59	2578.98	2905.97	3232.52	3558.61	3884.29	4209.52	4534.28	4858.58	6814.6	8770.13	10725.2	12679.9	14634.2	16588.2	18542	20488.3	22435.9	24376.1	27458.2
16	0	0	0	0	0	0	0	0	0	0	105.651	113.356	121.614	130.463	139.942	150.096	160.97	172.486	184.869	195.381	205.805	309.356	412.564	515.394	412.212	514.77	616.707	721.243	796.65	871.347	946.036	1020.72	1095.39	1170.05	1244.7	1319.34	1393.96	1468.57	2010.47	2564.1	3118.91	3658.48	4233.13	4782	5337.43	5881.18	6421.39	6963.4	8306.01
17	0	0	0	8.97368	28.8015	159.886	1251.34	1487.34	1364.47	1513.5	1306.3	1384.73	1479.27	1565.3	1474.6	1368.39	1272.42	1545.16	1793.71	1697.29	1404.42	1246.38	1022.05	703.487	575.784	534.1	635.077	426.079	583.812	618.846	653.88	688.913	723.947	758.98	794.014	829.048	864.081	899.114	1652.33	2058.53	2464.7	2999.4	3566.35	4136.91	4707.16	5124.2	5552.39	6041.69	16023.6
18	0	0	0	0	0	0	171.135	278.845	448.236	708.398	1095.92	741.672	403.866	383.833	364.113	344.807	325.994	307.758	290.143	273.18	256.902	241.324	226.457	212.294	198.94	186.174	174.085	193.428	249.203	304.978	360.752	416.002	472.302	527.846	583.852	639.005	694.855	750.694	8029.92	16499.1	23411.5	30568.7	33837.8	35785.9	34986.7	33279.2	21823.4	28684	59925.6
19	0	0	0	0	0	0	0	0	0	0	0	1.80378	4.01819	5.2066	6.74707	8.74277	11.326	14.6653	18.9746	20.7284	22.3013	25.8237	33.0829	23.7106	26.245	28.1773	32.611	36.8694	47.1	57.3305	67.5611	77.7916	88.0221	98.2527	108.483	118.714	128.944	139.175	173.649	208.124	242.599	277.074	360.513	521.521	678.601	836.262	987.605	1138.87	1621.99
20	0	0	0	0	0	0	145.121	287.857	384.464	1404.69	910	921.25	1567.48	5517.23	4199.37	3044.72	977.5	2543.73	4255.55	4678.76	5479.75	1216.43	1245.87	1273.87	1301.84	1665.01	1715.06	1772.65	2079.88	2204.35	2458.41	2636.05	2851.9	3068.84	3293.14	3516.89	3740.08	3962.65	4738.24	5513.23	6293.63	7072.17	7850.33	9648	27470.2	33774.7	38872.3	41728.7	55147.3
21	0	0	0	0	0	0	0	0	0	10.7561	18.881	20.7975	22.7194	24.6469	26.5799	28.5184	30.4625	32.4121	34.3673	36.3282	40.2109	52.3564	62.9153	61.964	73.5239	87.0466	99.9648	115.184	139.249	164.435	194.274	224.04	253.724	283.315	312.802	342.17	371.401	400.472	1043.14	1743.07	2397.38	2685.95	2971.2	3245.79	3518.93	3755.73	3974.98	4332.64	2557.39
22	0	0	0	0	0	0	0	0	0	0	0	1.88011	2.2571	2.69464	3.20155	3.78785	4.4649	5.24565	6.14477	7.17894	8.36707	10.3297	12.6252	15.3033	21.6796	27.7428	31.4768	36.082	43.1232	50.1644	57.2056	64.2468	71.288	78.3291	85.3703	92.4115	99.4527	106.494	541.227	1360.27	2179.39	2998.57	3817.82	4240.82	4664.26	5088.14	5512.45	5937.21	5871.98
23	0	0	0	0	0	0	0	0	0	0	0	9.4816	13.0469	20.1321	26.9288	39.5754	51.6296	72.7663	88.9366	110.882	110.882	114.578	92.6187	101.48	123.503	154.908	201.012	292.057	319.963	347.87	375.777	403.683	431.59	459.497	487.403	515.31	543.217	571.124	768.386	965.649	1162.91	1360.17	1902.28	3753.38	5653.11	7101.03	5964.65	7431.96	7006.87
24	0	0	0	0	0	0	0	0	0	0	0	0	0	0	0	0	0	0	0	0	0	0	0	0	0	0	0	0	0	0	0	0	0	0	0	0	0	0	27.8628	44.0335	71.8448	126.878	210.137	247.819	285.636	323.599	360.594	691.898	1730.75
25	0	0	0	0	0	0	1008.77	1510.3	2242.98	3285.07	4772.49	4597.76	4401.48	4228.4	4032.06	3817.3	3588.16	3496.91	3360.28	3278.58	3139.33	2795.76	2464.02	2078.56	1959.11	1702.82	1778.7	1681.97	2314.33	2911.81	3507.87	4102.47	4695.58	5287.18	5877.24	6465.72	7052.58	7637.79	10471.7	13676.7	16866.5	20035.5	23189.3	26356.8	29517.8	32692.9	35544.1	38627.6	47562.6
26	0	0	0	0	0	0	0	0	0	0	0	0	0	0	0	0	0	0	0	0	16.5151	24.1006	31.6072	39.0337	47.2096	54.5923	67.7005	81.218	92.7242	107.77	122.773	137.818	152.665	167.829	182.806	197.664	212.699	227.609	257.855	284.1	310.337	336.164	361.886	388.921	416.261	443.393	470.249	496.72	364.867
27	0	0	0	0	0	0	0	0	0	0	0	0	0	0	0	0	0	0	0	0	0	0	0	0	0	0	0	0	0	0	0	0	0	0	0	0	0	0	0	0	0	0	0	0	0	0	0	0	0
Total	0	0	0	14.4893	391.012	1815.85	9748.08	11798	13334.6	16802	21501.8	22037.6	23670.7	28085.4	27032.9	26046.1	23923.7	26847.7	29662.6	30926.8	32114.5	25335	23359.3	23960.4	20987.2	20648.2	19526	17951.6	19861.4	21483.1	23244.2	24933.7	26664	28399.1	30142.7	31886.9	33631.4	35374.3	59864	85968.9	110412	134825	155767	176184	211309	233207	241263	270179	373511
Percentage of irrigated no rice land area
region	-10000	-9000	-8000	-7000	-6000	-5000	-4000	-3000	-2000	-1000	0	100	200	300	400	500	600	700	800	900	1000	1100	1200	1300	1400	1500	1600	1700	1710	1720	1730	1740	1750	1760	1770	1780	1790	1800	1810	1820	1830	1840	1850	1860	1870	1880	1890	1900	1910
1	0	0	0	0	0	0	0	0	0	0	0	0	0	0	0	0	0	0	0	0	0	0	0	0	0	0	0	0	0	0	0	0	0	0	0	0	0	0	3.63308e-06	7.2662e-06	1.08993e-05	1.45324e-05	1.81655e-05	2.17986e-05	2.54317e-05	2.90648e-05	3.26979e-05	3.6331e-05	7.5682e-05
2	0	0	0	0	0	0	0	0	0	0	0	0	0	0	0	0	0	0	4.56382e-06	5.15184e-06	5.74299e-06	6.22895e-06	6.93712e-06	7.55968e-06	8.45328e-06	9.29274e-06	4.39374e-06	5.57012e-06	6.85099e-06	8.13185e-06	9.41272e-06	1.06936e-05	1.19744e-05	1.32553e-05	1.45362e-05	1.5817e-05	1.70979e-05	1.83553e-05	0.000363574	0.0007089	0.00105398	0.00139866	0.00174224	0.00208283	0.00241723	0.00273301	0.00300644	0.00331094	0.00541124
3	0	0	0	0	0	0	0	0	0	0	0.000274721	0.000295698	0.000318277	0.000342581	0.000368742	0.0003969	0.000427209	0.000459833	0.000494949	0.00058188	0.000672148	0.000777283	0.000886421	0.000999683	0.00111719	0.00123908	3.42797e-05	0.00014125	0.000177174	0.000213098	0.000249023	0.000284947	0.000320871	0.000356795	0.000392719	0.000428643	0.000464567	0.000500491	0.000833897	0.0011673	0.00150071	0.00183411	0.00216752	0.00250092	0.00283433	0.00316773	0.00347717	0.00378727	0.00499094
4	0	0	0	0	0	0	0	0	0	0	0	0	0	0	0	0	0	0	2.07334e-05	3.02382e-05	3.9099e-05	4.03192e-05	4.12571e-05	4.18696e-05	4.20983e-05	4.18611e-05	2.93109e-05	4.68002e-05	5.18584e-05	5.69165e-05	6.19747e-05	6.70329e-05	7.18991e-05	7.65496e-05	8.09709e-05	8.45153e-05	8.67417e-05	8.64371e-05	0.000153665	0.000225036	0.000297644	0.000370078	0.000436228	0.000513358	0.000583127	0.000652218	0.000716235	0.00068562	0.00120996
5	0	0	0	0	0	0	0	0	0	0	0	3.09343e-10	3.80881e-10	3.80758e-10	4.68111e-10	5.75041e-10	7.05716e-10	8.65156e-10	8.39094e-10	1.02608e-09	1.25283e-09	1.34482e-09	1.05692e-09	1.19634e-09	1.32241e-09	1.02818e-09	6.05097e-09	3.40368e-08	4.22515e-08	5.06398e-08	5.50274e-08	6.34764e-08	7.17766e-08	8.01841e-08	9.07087e-08	9.65842e-08	1.05205e-07	1.0096e-07	1.27568e-07	1.25333e-07	6.60474e-08	7.28031e-08	8.32232e-08	8.72833e-08	9.78209e-08	1.1005e-07	1.24197e-07	1.31911e-07	9.79734e-06
6	0	0	0	0	0	0	0	0	0	3.79876e-05	6.6741e-05	7.18033e-05	7.54752e-05	7.93542e-05	8.34262e-05	8.7697e-05	9.21773e-05	9.90037e-05	0.000104057	0.000114822	0.000123435	0.000129628	0.000134897	0.000140194	0.000144176	0.000150398	9.96194e-05	9.87972e-05	0.000112356	0.000125999	0.000139597	0.000153199	0.000166787	0.000180375	0.000193946	0.000207496	0.000220969	0.00023433	0.000357586	0.000481098	0.000604328	0.000727371	0.000850108	0.000972319	0.001094	0.00121442	0.00133145	0.00144663	0.0016465
7	0	0	0	0	5.74729e-05	0.00025791	0.00116388	0.00133014	0.00140427	0.00147839	0.00173234	0.0018299	0.00193029	0.00202827	0.00212632	0.00222965	0.00228955	0.00242495	0.00252491	0.00262027	0.00271588	0.00233169	0.00197282	0.00209602	0.00163422	0.00144332	0.00159215	0.00122772	0.00119869	0.00117023	0.00114254	0.0011158	0.00108984	0.00106481	0.00104061	0.00101727	0.000994793	0.000973175	0.00107993	0.00118323	0.00128281	0.00137894	0.00147162	0.00137741	0.00152112	0.00167625	0.00211311	0.00249277	0.00282605
8	0	0	0	0	0	0	0	0	0	0	0	0	0	0	0	1.58746e-06	1.98983e-06	2.49414e-06	3.1262e-06	3.91834e-06	4.9111e-06	7.24828e-06	8.64261e-06	1.21744e-05	1.36981e-05	1.5654e-05	1.81053e-05	2.31959e-05	2.41495e-05	2.50755e-05	2.59852e-05	2.68724e-05	2.76805e-05	2.85305e-05	2.93493e-05	3.01234e-05	3.08386e-05	3.15368e-05	3.18214e-05	3.21891e-05	3.23445e-05	3.23711e-05	3.22314e-05	3.18752e-05	3.12347e-05	3.02665e-05	2.91977e-05	2.88617e-05	5.71005e-05
9	0	0	0	0	0	0	0	0	0	0	2.08107e-05	2.15629e-05	2.23418e-05	2.31484e-05	2.39835e-05	2.48482e-05	2.57436e-05	2.98694e-05	3.15407e-05	3.3741e-05	3.59517e-05	3.7102e-05	3.82573e-05	4.1211e-05	4.41784e-05	4.74666e-05	5.08875e-05	5.9826e-05	6.63219e-05	7.6751e-05	8.71802e-05	9.76093e-05	0.000108051	0.000118543	0.000129032	0.000139519	0.000150009	0.000160574	0.000190536	0.000215107	0.000239646	0.00026422	0.000288766	0.000313304	0.000337839	0.000362368	0.000386892	0.000411855	0.00059139
10	0	0	0	0	0	0	0	0	0	0	0	0	0	0	0	0	0	0	0	0	0	0	0	0	0	0	1.4754e-05	4.21408e-05	5.03991e-05	5.86191e-05	6.68652e-05	7.51334e-05	8.33783e-05	9.16229e-05	9.98678e-05	0.000108113	0.000116357	0.000124602	0.000443537	0.00076247	0.0010814	0.00140034	0.00171928	0.00203821	0.00235714	0.00267608	0.00299501	0.00331395	0.00386627
11	0	0	0	0	0	0	0	0	0	0	0.000103288	0.000123487	0.000296945	0.00027178	0.000243913	0.000180239	0.000129245	0.000153437	0.000176079	0.000190073	0.000157455	0.000172643	0.000227513	0.000231667	0.000191867	0.000235245	0.000262892	0.000281354	0.000315023	0.0003526	0.000390944	0.000429789	0.000468656	0.000507601	0.000546184	0.000584942	0.000623513	0.000661894	0.00133786	0.00201658	0.00268766	0.00336144	0.00402862	0.00469433	0.00537007	0.00603548	0.00637242	0.00714668	0.00887275
12	0	0	0	0	0	0	0	0	0	0	0	0	0	0	0	0	0	0	0	0	0	0	0	0	0	0	0	1.6086e-05	1.73266e-05	1.90567e-05	2.09115e-05	2.27361e-05	2.45289e-05	2.62885e-05	2.80132e-05	2.97015e-05	3.1429e-05	3.30432e-05	6.97919e-05	0.000106496	0.000143509	0.000179955	0.000216332	0.000253397	0.000290462	0.00031996	0.000352672	0.000391318	0.000650218
13	0	0	0	7.11167e-06	2.1335e-05	0.000135122	0.000221405	0.000301329	0.000578544	0.000823979	0.00102102	0.00109553	0.00116803	0.00107223	0.000977677	0.000884094	0.000791201	0.000854481	0.000911705	0.000979008	0.00103353	0.000719735	0.000792401	0.000823776	0.000641573	0.00066486	0.000810184	0.000807618	0.000885302	0.000962303	0.00103926	0.00111616	0.00119301	0.00126981	0.00134656	0.00142326	0.00149991	0.0015765	0.00189794	0.00221932	0.00253433	0.00284988	0.00316509	0.00347996	0.00379447	0.00411266	0.00443119	0.00474959	0.00573727
14	0	0	0	0	0	0	0	0	0	0	0	0	0	0	0	0	0	0	0	0	0	0	0	0	0	0	0	9.76231e-06	1.2129e-05	1.44956e-05	1.68622e-05	1.92289e-05	2.17197e-05	2.4097e-05	2.64744e-05	2.88518e-05	3.12292e-05	3.36066e-05	6.78291e-05	0.000102052	0.000136274	0.000158591	0.000196081	0.000238942	0.000269166	0.000306663	0.000339132	0.000375832	0.00125728
15	0	0	0	0	0	0	0	0	0	0	0.000112821	0.000149576	0.000159618	0.000170225	0.000181404	0.000193142	0.000205345	0.000217862	0.000232541	0.0002378	0.000240858	0.0002583	0.000276274	0.000293559	0.000310801	0.000330272	0.00037344	0.000412276	0.000494715	0.000579011	0.000663204	0.00074729	0.000831266	0.000915122	0.000998873	0.00108251	0.00116602	0.00124942	0.00175242	0.0022553	0.00275807	0.00326073	0.0037633	0.00426578	0.00476821	0.0052687	0.00576954	0.00626849	0.00706107
16	0	0	0	0	0	0	0	0	0	0	6.39628e-06	6.86279e-06	7.36273e-06	7.89844e-06	8.47235e-06	9.08709e-06	9.74539e-06	1.04426e-05	1.11923e-05	1.18287e-05	1.24598e-05	1.87289e-05	2.49773e-05	3.12028e-05	2.4956e-05	3.11651e-05	3.73365e-05	4.36653e-05	4.82306e-05	5.27528e-05	5.72746e-05	6.17959e-05	6.63166e-05	7.08367e-05	7.53561e-05	7.98748e-05	8.43928e-05	8.89098e-05	0.000121717	0.000155235	0.000188824	0.00022149	0.000256281	0.00028951	0.000323137	0.000356056	0.000388761	0.000421576	0.000502859
17	0	0	0	1.73471e-06	5.56763e-06	3.09075e-05	0.000241897	0.000287518	0.000263766	0.000292575	0.000252522	0.000267683	0.000285958	0.000302588	0.000285055	0.000264523	0.000245972	0.000298696	0.000346744	0.000328103	0.000271488	0.000240937	0.000197573	0.000135991	0.000111305	0.000103247	0.000122767	8.23654e-05	0.000112857	0.000119629	0.000126402	0.000133174	0.000139946	0.000146719	0.000153491	0.000160263	0.000167036	0.000173808	0.000319413	0.000397936	0.000476452	0.000579815	0.000689413	0.000799706	0.000909942	0.00099056	0.00107333	0.00116792	0.00309752
18	0	0	0	0	0	0	5.40856e-05	8.81266e-05	0.000141661	0.000223883	0.000346357	0.000234399	0.000127638	0.000121307	0.000115075	0.000108973	0.000103027	9.72642e-05	9.16972e-05	8.63362e-05	8.11918e-05	7.62684e-05	7.15698e-05	6.70936e-05	6.28734e-05	5.88388e-05	5.50181e-05	6.11312e-05	7.87584e-05	9.63855e-05	0.000114013	0.000131474	0.000149267	0.000166821	0.000184521	0.000201952	0.000219603	0.00023725	0.00253779	0.0052144	0.00739901	0.00966097	0.0106941	0.0113098	0.0110572	0.0105176	0.0068971	0.00906532	0.018939
19	0	0	0	0	0	0	0	0	0	0	0	7.62922e-06	1.69953e-05	2.20217e-05	2.85373e-05	3.69783e-05	4.7904e-05	6.20282e-05	8.02547e-05	8.76727e-05	9.43253e-05	0.000109224	0.000139927	0.000100286	0.000111006	0.000119178	0.000137931	0.000155942	0.000199213	0.000242484	0.000285755	0.000329026	0.000372297	0.000415568	0.000458839	0.00050211	0.00054538	0.000588652	0.000734465	0.000880278	0.00102609	0.00117191	0.00152482	0.00220581	0.0028702	0.00353704	0.00417715	0.00481695	0.00686033
20	0	0	0	0	0	0	1.33307e-05	2.64423e-05	3.53165e-05	0.000129034	8.3592e-05	8.46254e-05	0.000143987	0.000506809	0.000385751	0.000279686	8.97925e-05	0.000233666	0.000390912	0.000429788	0.000503366	0.00011174	0.000114445	0.000117017	0.000119586	0.000152946	0.000157544	0.000162834	0.000191057	0.00020249	0.000225827	0.000242145	0.000261973	0.000281902	0.000302506	0.000323059	0.000343561	0.000364006	0.000435251	0.000506441	0.000578128	0.000649644	0.000721126	0.000886258	0.00252339	0.00310252	0.00357078	0.00383316	0.00506579
21	0	0	0	0	0	0	0	0	0	4.17411e-06	7.32714e-06	8.07087e-06	8.81672e-06	9.56471e-06	1.03148e-05	1.10671e-05	1.18216e-05	1.25782e-05	1.33369e-05	1.40979e-05	1.56046e-05	2.0318e-05	2.44155e-05	2.40464e-05	2.85324e-05	3.37802e-05	3.87933e-05	4.46995e-05	5.40385e-05	6.38123e-05	7.5392e-05	8.69432e-05	9.84626e-05	0.000109946	0.000121389	0.000132786	0.000144129	0.000155411	0.000404811	0.000676434	0.000930351	0.00104234	0.00115303	0.00125959	0.00136559	0.00145749	0.00154257	0.00168137	0.000992447
22	0	0	0	0	0	0	0	0	0	0	0	7.78326e-07	9.34389e-07	1.11552e-06	1.32537e-06	1.56809e-06	1.84837e-06	2.17159e-06	2.5438e-06	2.97193e-06	3.46378e-06	4.27628e-06	5.22656e-06	6.33523e-06	8.9749e-06	1.14849e-05	1.30307e-05	1.49372e-05	1.78521e-05	2.0767e-05	2.36819e-05	2.65968e-05	2.95117e-05	3.24266e-05	3.53415e-05	3.82564e-05	4.11713e-05	4.40862e-05	0.000224056	0.000563123	0.000902219	0.00124134	0.0015805	0.00175561	0.0019309	0.00210638	0.00228204	0.00245788	0.00243087
23	0	0	0	0	0	0	0	0	0	0	0	2.25049e-05	3.09672e-05	4.77842e-05	6.39165e-05	9.39334e-05	0.000122544	0.000172713	0.000211094	0.000263182	0.000263182	0.000271955	0.000219834	0.000240866	0.000293139	0.000367679	0.000477109	0.000693206	0.000759443	0.000825681	0.000891918	0.000958156	0.00102439	0.00109063	0.00115687	0.00122311	0.00128934	0.00135558	0.00182379	0.002292	0.00276021	0.00322842	0.00451513	0.00890877	0.0134178	0.0168545	0.0141573	0.01764	0.016631
24	0	0	0	0	0	0	0	0	0	0	0	0	0	0	0	0	0	0	0	0	0	0	0	0	0	0	0	0	0	0	0	0	0	0	0	0	0	0	3.4679e-06	5.48056e-06	8.94205e-06	1.57917e-05	2.61543e-05	3.08444e-05	3.55513e-05	4.02763e-05	4.48807e-05	8.61159e-05	0.000215415
25	0	0	0	0	0	0	0.000547233	0.000819299	0.00121676	0.00178207	0.00258895	0.00249417	0.00238769	0.00229379	0.00218728	0.00207079	0.00194648	0.00189698	0.00182286	0.00177854	0.00170301	0.00151663	0.00133667	0.00112756	0.00106277	0.000923734	0.000964899	0.000912423	0.00125547	0.00157958	0.00190293	0.00222548	0.00254723	0.00286816	0.00318825	0.00350748	0.00382584	0.0041433	0.00568062	0.00741925	0.00914962	0.0108687	0.0125796	0.0142979	0.0160126	0.0177351	0.0192818	0.0209545	0.0258014
26	0	0	0	0	0	0	0	0	0	0	0	0	0	0	0	0	0	0	0	0	2.94898e-06	4.30347e-06	5.64387e-06	6.96997e-06	8.42989e-06	9.74816e-06	1.20888e-05	1.45025e-05	1.65571e-05	1.92437e-05	2.19226e-05	2.46092e-05	2.72603e-05	2.9968e-05	3.26423e-05	3.52955e-05	3.79801e-05	4.06426e-05	4.60434e-05	5.07297e-05	5.54147e-05	6.00264e-05	6.46194e-05	6.9447e-05	7.43288e-05	7.91735e-05	8.3969e-05	8.86958e-05	6.51518e-05
27	0	0	0	0	0	0	0	0	0	0	0	0	0	0	0	0	0	0	0	0	0	0	0	0	0	0	0	0	0	0	0	0	0	0	0	0	0	0	0	0	0	0	0	0	0	0	0	0	0
Total	0	0	0	1.1114e-07	2.99926e-06	1.39285e-05	7.47728e-05	9.0497e-05	0.000102284	0.00012888	0.00016493	0.00016904	0.000181566	0.000215429	0.000207357	0.000199787	0.000183507	0.000205936	0.000227527	0.000237224	0.000246334	0.000194333	0.000179178	0.000183789	0.000160983	0.000158383	0.000149774	0.000137698	0.000152347	0.000164787	0.000178295	0.000191254	0.000204526	0.000217836	0.00023121	0.000244589	0.00025797	0.000271339	0.000459187	0.000659425	0.00084692	0.00103418	0.00119481	0.00135142	0.00162084	0.00178882	0.00185061	0.00207241	0.00286502
Irrigated no-rice land per capita (ha/cap)
region	-10000	-9000	-8000	-7000	-6000	-5000	-4000	-3000	-2000	-1000	0	100	200	300	400	500	600	700	800	900	1000	1100	1200	1300	1400	1500	1600	1700	1710	1720	1730	1740	1750	1760	1770	1780	1790	1800	1810	1820	1830	1840	1850	1860	1870	1880	1890	1900	1910
1	0	0	0	0	0	0	0	0	0	0	1.07781	1.06321	1.04873	1.03433	1.01998	1.00563	0.991207	0.976613	0.961728	1.13064	1.30604	1.25861	1.23028	1.21405	1.20601	1.20382	0.0333042	0.137231	0.151469	0.156673	0.156995	0.153619	0.147544	0.139595	0.130443	0.120622	0.110549	0.10054	0.141194	0.164943	0.176568	0.179283	0.175648	0.143026	0.141488	0.135673	0.132496	0.133542	0.133964
2	0	0	0	0	0	0	0	0	0	0	0	0	0	0	0	0	0	0	0.00156535	0.00202909	0.00236094	0.00225998	0.00208756	0.00195834	0.00177938	0.00163075	0.00276773	0.00371093	0.00277692	0.00230079	0.00201209	0.00181837	0.00167489	0.00156251	0.00147074	0.00138284	0.00129115	0.00100643	0.00138172	0.00156089	0.00158114	0.00151018	0.00134793	0.00118345	0.00110023	0.000947903	0.000834056	0.000661309	0.000971005
3	0	0	0	0	0	0	0	0	0	0	0	3.30117e-08	3.85313e-08	3.65145e-08	4.25562e-08	4.95571e-08	5.76543e-08	6.70026e-08	6.1603e-08	6.53812e-08	7.05166e-08	6.67892e-08	4.69653e-08	4.80978e-08	4.8543e-08	3.4723e-08	5.10876e-06	7.18421e-06	8.22761e-06	9.15249e-06	9.27873e-06	1.00309e-05	1.0672e-05	1.12566e-05	1.20609e-05	1.21974e-05	1.26508e-05	1.15864e-05	1.40012e-05	1.31807e-05	6.6671e-06	7.06552e-06	7.77671e-06	7.86392e-06	8.50853e-06	9.25226e-06	8.84938e-06	8.17985e-06	0.000545632
4	0	0	0	0	0	0	0	0	0	0.0853658	0.123399	0.119791	0.113401	0.107149	0.100989	0.0949121	0.088916	0.0848168	0.0788468	0.0703127	0.0623987	0.0577219	0.0524633	0.0470444	0.0410209	0.0353771	0.0499079	0.0553359	0.0603437	0.0645627	0.06787	0.0702501	0.071671	0.0721335	0.0716456	0.0698954	0.0674538	0.0643981	0.0875327	0.106182	0.115285	0.123482	0.12753	0.132326	0.133869	0.13336	0.131026	0.127057	0.121441
5	0	0	0	0	0.0280661	0.0959609	0.329937	0.287293	0.231088	0.185362	0.165487	0.163153	0.16063	0.157532	0.154136	0.150852	0.144577	0.142919	0.13889	0.141545	0.144085	0.111588	0.0859922	0.0838804	0.0604492	0.0463268	1.07865	1.33947	1.13684	0.959788	0.806125	0.673634	0.559996	0.463212	0.381259	0.31231	0.254671	0.206773	0.1792	0.159875	0.136489	0.120862	0.109535	0.0889857	0.0866886	0.0858721	0.0871454	0.0848447	0.0763069
6	0	0	0	0	0	0	0	0	0	0	0	0	0	0	0	0.000353162	0.000415647	0.00048904	0.000575208	0.000652252	0.000746162	0.00100347	0.00109918	0.00143097	0.00149646	0.00159735	0.00374161	0.00492105	0.00503385	0.00513564	0.0052292	0.00531367	0.00537848	0.0054475	0.0055068	0.00555427	0.00558782	0.00561548	0.00555611	0.0052347	0.00445546	0.00390109	0.00333826	0.00280739	0.00247283	0.00205097	0.00159453	0.00135532	0.00224041
7	0	0	0	0	0	0	0	0	0	0	0.00148449	0.00145336	0.00142632	0.00153831	0.00166061	0.00182361	0.00200795	0.00218784	0.00213782	0.00206342	0.00200283	0.00228448	0.00251438	0.00248642	0.00303301	0.00334507	0.00270593	0.00376259	0.00416123	0.00477873	0.0053865	0.0059845	0.00657353	0.0071558	0.00772805	0.0082902	0.00884244	0.00938858	0.0105271	0.011224	0.0111327	0.0110584	0.0109934	0.0116309	0.0113205	0.0110029	0.00992242	0.0093286	0.0121568
8	0	0	0	0	0	0	0	0	0	0	0	0	0	0	0	0	0	0	0	0	0	0	0	0	0	0	4.95974e-05	0.00012136	0.000144549	0.000167711	0.00019069	0.000213415	0.000235707	0.000257582	0.000278973	0.000299831	0.000320085	0.000339671	0.00119694	0.00203366	0.00284732	0.00363481	0.00439233	0.00511544	0.00578672	0.0064074	0.00696697	0.00744644	0.00830785
9	0	0	0	0	0	0	0	0	0	0	0.0127767	0.014081	0.0310078	0.0258011	0.0208827	0.013792	0.0087542	0.00909904	0.00902982	0.00901035	0.00693916	0.0070238	0.00859539	0.0080349	0.00615016	0.00696143	0.00711349	0.00701226	0.00773779	0.00855618	0.00936889	0.0101682	0.0109413	0.0116884	0.0123981	0.013081	0.0137242	0.0143293	0.0284637	0.0421225	0.0516009	0.0596369	0.0663373	0.0715675	0.0764836	0.0804252	0.0796476	0.0837528	0.0973694
10	0	0	0	0	0	0	0	0	0	0	0	0	0	0	0	0	0	0	0	0	0	0	0	0	0	0	0	0.0025017	0.00274651	0.00307999	0.00344744	0.0038248	0.00421243	0.00461072	0.0050201	0.005441	0.0058884	0.0063349	0.0136989	0.0214133	0.0295776	0.0380405	0.0388511	0.0369131	0.0319023	0.0177584	0.0159465	0.012686	0.0157135
11	0	0	0	0.00268249	0.00556964	0.0232757	0.0200397	0.0141162	0.0107727	0.00734759	0.00312815	0.00322348	0.00331458	0.00322475	0.00312695	0.0033217	0.00363409	0.00356181	0.00342904	0.00329377	0.00312443	0.0017907	0.00145312	0.0010369	0.00122234	0.000965617	0.000896148	0.000787991	0.000810684	0.000846028	0.000877171	0.000906081	0.000932816	0.000957264	0.000979927	0.0009972	0.00100961	0.00102376	0.00117883	0.00128396	0.00134825	0.00140166	0.00147532	0.00153387	0.00158021	0.00158872	0.00159966	0.00158392	0.00175277
12	0	0	0	0	0	0	0	0	0	0	0	0	0	0	0	0	0	0	0	0	0	0	0	0	0	0	0	4.20073e-05	4.90092e-05	5.56974e-05	6.16342e-05	6.68795e-05	7.18974e-05	7.59209e-05	7.93935e-05	8.23525e-05	8.48321e-05	8.68628e-05	0.000166718	0.000238058	0.000291527	0.00031224	0.000357769	0.000396497	0.000408539	0.000417403	0.000417852	0.0004299	0.00132251
13	0	0	0	0	0	0	0	0	0	0	0.00731204	0.00894848	0.00886716	0.0101838	0.011757	0.0136557	0.0159704	0.0154035	0.0150712	0.0139582	0.0129189	0.0189518	0.0171895	0.0158549	0.020838	0.0205492	0.0181523	0.0188613	0.0223714	0.0258093	0.0291398	0.0323654	0.0354881	0.03851	0.0414339	0.0442614	0.0469952	0.0496369	0.0686256	0.087057	0.102588	0.117242	0.130802	0.143325	0.154865	0.16745	0.1797	0.191336	0.211216
14	0	0	0	0	0	0	0	0	0	0	0.0173218	0.0172108	0.0171296	0.0170739	0.01704	0.0172597	0.0174689	0.0174404	0.0174323	0.0171952	0.0169806	0.0170163	0.0151288	0.0188996	0.0151159	0.0141576	0.0135688	0.0119017	0.0120851	0.0124492	0.0127283	0.0129309	0.0130647	0.0131368	0.0131537	0.0131215	0.0130457	0.0129314	0.0166541	0.01977	0.0223425	0.0241077	0.0263704	0.0264716	0.0265337	0.0253506	0.0239921	0.0219254	0.0217665
15	0	0	0	0.00199329	0.00548367	0.0260926	0.175039	0.178329	0.140227	0.133322	0.0986317	0.0975829	0.0972956	0.0960903	0.0844877	0.0731753	0.0635075	0.071979	0.0779869	0.0713137	0.0570895	0.0480846	0.0373822	0.0237178	0.0178811	0.0152596	0.0158765	0.00948929	0.0125465	0.0128907	0.0131902	0.0134462	0.0136597	0.0138325	0.0139662	0.0140623	0.0141226	0.014149	0.0250172	0.029965	0.034469	0.0402733	0.0459453	0.0511036	0.0557228	0.0553941	0.0555393	0.0538839	0.128684
16	0	0	0	0	0	0	0.0215952	0.0301598	0.0415539	0.0562873	0.0746318	0.0452672	0.0223116	0.0193474	0.0168527	0.0157417	0.0146348	0.0126715	0.0109324	0.00962925	0.00850675	0.00532735	0.00339521	0.00298212	0.00289667	0.00211303	0.00158984	0.00155183	0.00186155	0.00204631	0.002196	0.0023163	0.00242199	0.00250755	0.00258222	0.00264262	0.00269707	0.00274394	0.0277215	0.0533315	0.070724	0.0786087	0.0803103	0.0743194	0.0670265	0.0556545	0.0318965	0.0374266	0.0633962
17	0	0	0	0	0	0	0	0	0	0	0	1.58166e-05	3.04315e-05	3.36688e-05	4.53638e-05	5.99196e-05	7.74571e-05	0.000102569	0.000134517	0.000141857	0.00017167	0.000200066	0.000253518	0.000207229	0.000242428	0.000245228	0.000239718	0.000289108	0.000362391	0.00043511	0.00050572	0.000574229	0.000640653	0.000704993	0.00076726	0.00082746	0.000885606	0.000941684	0.00115419	0.00135799	0.00151693	0.00166338	0.00207986	0.0028937	0.00360786	0.0040098	0.00431781	0.00465711	0.00623041
18	0	0	0	0	0	0	0.0029195	0.00293833	0.00199123	0.00369139	0.00121337	0.00116988	0.00190003	0.00639695	0.0046661	0.00324777	0.00100259	0.00251238	0.00405299	0.00430241	0.004871	0.00104641	0.00103824	0.00102941	0.00102106	0.00126859	0.00127042	0.00107434	0.00123314	0.00127913	0.00139683	0.0014672	0.0015556	0.00164111	0.00172719	0.00180974	0.00188894	0.00196497	0.00230761	0.00268941	0.00291375	0.00333593	0.00338379	0.00395412	0.0107306	0.0131317	0.0139015	0.0146673	0.0208853
19	0	0	0	0	0	0	0	0	0	0.00669594	0.00940312	0.0078055	0.00641759	0.00523317	0.00423674	0.00340824	0.00272619	0.00216945	0.00171837	0.00161458	0.00160843	0.00174521	0.00157288	0.00206546	0.00210068	0.00217617	0.0019993	0.00184295	0.00202695	0.00224817	0.00249463	0.00270172	0.00287323	0.0030126	0.00312301	0.00320736	0.00326828	0.0033082	0.00808861	0.0126861	0.0172123	0.0192271	0.0212062	0.0229588	0.02467	0.0262056	0.027556	0.0298405	0.0173195
20	0	0	0	0	0	0	0	0	0	0	0	3.62755e-06	5.1782e-06	1.20634e-05	1.0489e-05	1.00344e-05	8.81596e-06	1.24381e-05	1.84513e-05	1.78671e-05	2.23904e-05	1.13029e-05	1.20804e-05	1.88953e-05	3.0092e-05	3.01321e-05	3.18383e-05	3.57133e-05	4.07657e-05	4.13569e-05	4.4374e-05	4.43365e-05	3.95317e-05	3.93368e-05	3.84053e-05	3.32507e-05	3.3035e-05	3.61695e-05	0.000157132	0.000382818	0.000557305	0.000724912	0.000883637	0.000998068	0.00129153	0.00139212	0.00146201	0.0014769	0.0013798
21	0	0	0	0	0	0	0	0	0	0	0	0.000333645	0.000423642	0.000605205	0.000751355	0.00102665	0.00124638	0.00163453	0.0018565	0.00218595	0.00207085	0.00175	0.0011964	0.00121758	0.0012895	0.00143176	0.00157817	0.00197273	0.00208437	0.00218458	0.00227765	0.00236434	0.00244518	0.00252074	0.00259144	0.00265771	0.00271989	0.00277827	0.00354457	0.00423537	0.00470884	0.00507985	0.00656863	0.0115726	0.0157411	0.0173669	0.0129959	0.0145652	0.0120874
22	0	0	0	0	0	0	0	0	0	0	0	0	0	0	0	0	0	0	0	0	0	0	0	0	0	0	0	0	0	0	0	0	0	0	0	0	0	0	0.000188647	0.000284243	0.000443085	0.00074901	0.0011895	0.00112164	0.00107746	0.00104635	0.00102026	0.00174015	0.00363762
23	0	0	0	0	0	0	1.70231	1.69909	1.68224	1.64254	1.59083	0.919554	0.628785	0.3844	0.268804	0.169658	0.119605	0.0777094	0.0610961	0.051228	0.0523223	0.0450929	0.0385005	0.0284734	0.0210657	0.013844	0.010463	0.0062995	0.00798045	0.0100407	0.0120961	0.0141464	0.0161916	0.0183583	0.0205498	0.0227666	0.0250091	0.0272779	0.0363601	0.0462051	0.0554819	0.0642164	0.0724666	0.0794515	0.08594	0.0888227	0.0886894	0.086272	0.0944298
24	0	0	0	0	0	0	0	0	0	0	0	0	0	0	0	0	0	0	0	0	0.00561843	0.0080459	0.00981127	0.0116565	0.0136527	0.0130048	0.0135912	0.0140839	0.0162184	0.0186544	0.0210102	0.0232921	0.0254504	0.0275604	0.0295265	0.031347	0.033029	0.034497	0.0393446	0.0413869	0.0411914	0.0383894	0.0301594	0.0204198	0.0162231	0.0139209	0.0110523	0.00979873	0.006138
25	0	0	0	0	0	0	0	0	0	0	0	0	0	0	0	0	0	0	0	0	0	0	0	0	0	0	0	0	0	0	0	0	0	0	0	0	0	0	0	0	0	0	0	0	0	0	0	0	0
26	0	0	0	0	0	0	0	0	0	0	0	0	0	0	0	0	0	0	0	0	0	0	0	0	0	0	0	0	0	0	0	0	0	0	0	0	0	0	0	0	0	0	0	0	0	0	0	0	0
27	0	0	0	0	0	0	0	0	0	0	0	0	0	0	0	0	0	0	0	0	0	0	0	0	0	0	0	0	0	0	0	0	0	0	0	0	0	0	0	0	0	0	0	0	0	0	0	0	0
Total	0	0	0	0	0	0	0	0	0	0	0	0	0	0	0	0	0	0	0	0	0	0	0	0	0	0	0	0	0	0	0	0	0	0	0	0	0	0	0	0	0	0	0	0	0	0	0	0	0
in km2	-10000	-9000	-8000	-7000	-6000	-5000	-4000	-3000	-2000	-1000	0	100	200	300	400	500	600	700	800	900	1000	1100	1200	1300	1400	1500	1600	1700	1710	1720	1730	1740	1750	1760	1770	1780	1790	1800	1810	1820	1830	1840	1850	1860	1870	1880	1890	1900	1910
North America	0	0	0	0	0	0	0	0	0	0	0	0	0	0	0	0	0	0	41.434	46.7726	52.1395	56.5514	62.9808	68.6328	76.7456	84.3669	39.8899	50.57	62.1987	73.8274	85.4561	97.085	108.714	120.342	131.971	143.6	155.228	166.644	3333.21	6500.76	9666.06	12827.7	15979.5	19104	22172.4	25071.7	27586.5	30383.4	49802.5
Latin America	0	0	0	0	0	0	0	0	0	348.9	1146.79	1234.05	1311.65	1394.5	1482.74	1576.68	1676.72	1802.81	1932.69	2207.47	2468.5	2730.56	2991.7	3260.89	3525.96	3819.76	1003.17	1216.56	1414.69	1613.59	1812.04	2010.56	2208.8	2406.9	2604.69	2801.59	2996.86	3189.11	5018.65	6853.33	8685.87	10517.1	12340.9	14168	15984.7	17789.5	19512.9	21150.8	25792.5
Europe	0	0	0	0	0	0	0	0	0	0	374.434	447.656	1076.47	985.239	884.216	653.391	468.533	556.23	638.309	689.039	570.797	625.854	824.766	839.826	695.543	852.796	953.018	1041.46	1165.18	1303.71	1445.2	1588.46	1731.75	1875.29	2017.46	2160.22	2302.36	2443.65	4943.29	7452.81	9935.09	12426.4	14893.6	17356.5	19855.8	22307.4	23572.6	26431.1	33034.6
USSR	0	0	0	0	0	0	0	0	0	0	544.374	695.007	742.315	792.413	845.362	901.164	959.491	1019.68	1089.14	1120.11	1142.42	1313.8	1486.9	1656.95	1620.82	1799.09	2068.89	2332.5	2730.44	3134.89	3538.93	3942.54	4345.82	4748.53	5150.82	5552.65	5954	6354.87	8881	11418.4	13956.5	16469.2	19029.1	21567.3	24101.4	26622.3	29136.9	31649.4	36801
N.Africa_M.East	0	0	0	14.4893	391.012	1815.85	8423.05	9721.04	10259	11044.2	12517.1	13240.1	13994.7	14595.7	15021.3	15464	15656.3	16792.5	17686.6	18215.9	18540.3	15828.3	13501.9	13948.7	10902.2	9730.44	10839.3	8436.43	8479.81	8403.4	8331.58	8265.42	8203.93	8148.01	8097.02	8051.15	8010.44	7974.85	9619.43	10896.2	12145.6	13503.1	14872	15120.1	16798.6	18395.5	21698.1	24717.8	37470.2
Tropical Africa	0	0	0	0	0	0	0	0	0	0	121.731	126.13	130.686	135.404	140.289	163.365	173.17	203.028	219.977	241.839	282.554	323.395	353.486	418.277	461.105	509.921	588.849	745.819	816.213	912.794	1009.18	1105.38	1200.53	1296.76	1392.44	1487.48	1582.04	1676.73	2274.27	2837.23	3397.57	3956.26	4512.78	5068.12	5620.51	6168.95	6715.93	7273.42	9185.59
China	0	0	0	0	0	0	145.121	287.857	384.464	1404.69	910	923.054	1571.49	5522.44	4206.11	3053.46	988.826	2558.4	4274.53	4699.49	5502.05	1242.25	1278.95	1297.58	1328.08	1693.18	1747.67	1809.52	2126.98	2261.68	2525.97	2713.84	2939.92	3167.09	3401.63	3635.61	3869.02	4101.83	4911.89	5721.35	6536.23	7349.24	8210.84	10169.5	28148.8	34610.9	39859.9	42867.5	56769.3
South Asia	0	0	0	0	0	0	171.135	278.845	448.236	708.398	1095.92	741.672	403.866	383.833	364.113	344.807	325.994	307.758	290.143	273.18	256.902	241.324	226.457	212.294	198.94	186.174	174.085	193.428	249.203	304.978	360.752	416.002	472.302	527.846	583.852	639.005	694.855	750.694	8029.92	16499.1	23411.5	30568.7	33837.8	35785.9	34986.7	33279.2	21823.4	28684	59925.6
SE Asia	0	0	0	0	0	0	1008.77	1510.3	2242.98	3295.83	4791.37	4620.44	4426.46	4255.74	4061.84	3849.61	3623.09	3534.57	3400.79	3322.09	3187.91	2858.45	2539.56	2155.83	2054.31	1817.61	1910.14	1833.23	2496.71	3126.41	3759.35	4390.75	5020.59	5648.83	6275.41	6900.3	7523.43	8144.76	12056.1	16780	21443.2	25720	29978.3	33843.4	37701	41536.8	45031.6	48897.5	55991.9
Pacific Dev.	0	0	0	0	0	0	0	0	0	0	0	9.4816	13.0469	20.1321	26.9288	39.5754	51.6296	72.7663	88.9366	110.882	110.882	114.578	92.6187	101.48	123.503	154.908	201.012	292.057	319.963	347.87	375.777	403.683	431.59	459.497	487.403	515.31	543.217	571.124	796.249	1009.68	1234.76	1487.05	2112.42	4001.2	5938.74	7424.63	6325.24	8123.85	8737.61
Total	0	0	0	14.4893	391.012	1815.85	9748.08	11798	13334.6	16802	21501.8	22037.6	23670.7	28085.4	27032.9	26046.1	23923.7	26847.7	29662.6	30926.8	32114.5	25335	23359.3	23960.4	20987.2	20648.2	19526	17951.6	19861.4	21483.1	23244.2	24933.7	26664	28399.1	30142.7	31886.9	33631.4	35374.3	59864	85968.9	110412	134825	155767	176184	211309	233207	241263	270179	373511
check	#DIV/0!	#DIV/0!	#DIV/0!	1	1	1	1	1	1	1	1	1	1	1	1	1	1	1	1	1	1	1	1	1	1	1	1	1	1	1	1	1	1	1	1	1	1	1	1	1	1	1	1	1	1	1	1	1	1
in Mha	-10000	-9000	-8000	-7000	-6000	-5000	-4000	-3000	-2000	-1000	0	100	200	300	400	500	600	700	800	900	1000	1100	1200	1300	1400	1500	1600	1700	1710	1720	1730	1740	1750	1760	1770	1780	1790	1800	1810	1820	1830	1840	1850	1860	1870	1880	1890	1900	1910
North America	0	0	0	0	0	0	0	0	0	0	0	0	0	0	0	0	0	0	0.0041434	0.00467726	0.00521395	0.00565514	0.00629808	0.00686328	0.00767456	0.00843669	0.00398899	0.005057	0.00621987	0.00738274	0.00854561	0.0097085	0.0108714	0.0120342	0.0131971	0.01436	0.0155228	0.0166644	0.333321	0.650076	0.966606	1.28277	1.59795	1.9104	2.21724	2.50717	2.75865	3.03834	4.98025
Latin America	0	0	0	0	0	0	0	0	0	0.03489	0.114679	0.123405	0.131165	0.13945	0.148274	0.157668	0.167672	0.180281	0.193269	0.220747	0.24685	0.273056	0.29917	0.326089	0.352596	0.381976	0.100317	0.121656	0.141469	0.161359	0.181204	0.201056	0.22088	0.24069	0.260469	0.280159	0.299686	0.318911	0.501865	0.685333	0.868587	1.05171	1.23409	1.4168	1.59847	1.77895	1.95129	2.11508	2.57925
Europe	0	0	0	0	0	0	0	0	0	0	0.0374434	0.0447656	0.107647	0.0985239	0.0884216	0.0653391	0.0468533	0.055623	0.0638309	0.0689039	0.0570797	0.0625854	0.0824766	0.0839826	0.0695543	0.0852796	0.0953018	0.104146	0.116518	0.130371	0.14452	0.158846	0.173175	0.187529	0.201746	0.216022	0.230236	0.244365	0.494329	0.745281	0.993509	1.24264	1.48936	1.73565	1.98558	2.23074	2.35726	2.64311	3.30346
USSR	0	0	0	0	0	0	0	0	0	0	0.0544374	0.0695007	0.0742315	0.0792412	0.0845362	0.0901164	0.0959491	0.101968	0.108914	0.112011	0.114242	0.13138	0.14869	0.165695	0.162082	0.179909	0.206889	0.23325	0.273044	0.313489	0.353893	0.394254	0.434582	0.474853	0.515082	0.555265	0.5954	0.635487	0.8881	1.14184	1.39565	1.64692	1.90291	2.15673	2.41014	2.66223	2.91369	3.16494	3.6801
N.Africa_M.East	0	0	0	0.00144893	0.0391012	0.181585	0.842305	0.972104	1.0259	1.10442	1.25171	1.32401	1.39947	1.45957	1.50213	1.5464	1.56563	1.67925	1.76866	1.82159	1.85403	1.58283	1.35019	1.39487	1.09022	0.973044	1.08393	0.843643	0.847981	0.84034	0.833158	0.826542	0.820393	0.814801	0.809702	0.805115	0.801044	0.797485	0.961943	1.08962	1.21456	1.35031	1.4872	1.51201	1.67986	1.83955	2.16981	2.47178	3.74702
Tropical Africa	0	0	0	0	0	0	0	0	0	0	0.0121731	0.012613	0.0130686	0.0135404	0.0140289	0.0163365	0.017317	0.0203028	0.0219977	0.0241839	0.0282554	0.0323395	0.0353486	0.0418277	0.0461105	0.0509921	0.0588849	0.0745819	0.0816213	0.0912794	0.100918	0.110538	0.120053	0.129676	0.139244	0.148748	0.158204	0.167673	0.227427	0.283723	0.339757	0.395626	0.451278	0.506812	0.562051	0.616895	0.671593	0.727342	0.918559
China	0	0	0	0	0	0	0.0145121	0.0287857	0.0384464	0.140469	0.091	0.0923054	0.157149	0.552244	0.420611	0.305346	0.0988826	0.25584	0.427453	0.469949	0.550205	0.124225	0.127895	0.129758	0.132808	0.169318	0.174767	0.180952	0.212698	0.226168	0.252597	0.271384	0.293992	0.316709	0.340163	0.363561	0.386902	0.410183	0.491189	0.572135	0.653623	0.734924	0.821084	1.01695	2.81488	3.46109	3.98599	4.28675	5.67693
South Asia	0	0	0	0	0	0	0.0171135	0.0278845	0.0448236	0.0708398	0.109592	0.0741672	0.0403866	0.0383833	0.0364113	0.0344807	0.0325994	0.0307758	0.0290143	0.027318	0.0256902	0.0241324	0.0226457	0.0212294	0.019894	0.0186174	0.0174085	0.0193428	0.0249203	0.0304978	0.0360752	0.0416002	0.0472302	0.0527846	0.0583852	0.0639005	0.0694855	0.0750694	0.802992	1.64991	2.34115	3.05687	3.38378	3.57859	3.49867	3.32792	2.18234	2.8684	5.99256
SE Asia	0	0	0	0	0	0	0.100877	0.15103	0.224298	0.329583	0.479137	0.462044	0.442646	0.425574	0.406184	0.384961	0.362309	0.353457	0.340079	0.332209	0.318791	0.285845	0.253956	0.215583	0.205431	0.181761	0.191014	0.183323	0.249671	0.312641	0.375935	0.439075	0.502059	0.564883	0.627541	0.69003	0.752343	0.814476	1.20561	1.678	2.14432	2.572	2.99783	3.38434	3.7701	4.15368	4.50316	4.88975	5.59919
Pacific Dev.	0	0	0	0	0	0	0	0	0	0	0	0.00094816	0.00130469	0.00201321	0.00269288	0.00395754	0.00516296	0.00727663	0.00889366	0.0110882	0.0110882	0.0114578	0.00926187	0.010148	0.0123503	0.0154908	0.0201012	0.0292057	0.0319963	0.034787	0.0375777	0.0403683	0.043159	0.0459497	0.0487403	0.051531	0.0543217	0.0571124	0.0796249	0.100968	0.123476	0.148705	0.211242	0.40012	0.593874	0.742463	0.632524	0.812385	0.873761
Total	0	0	0	0.00144893	0.0391012	0.181585	0.974808	1.1798	1.33346	1.6802	2.15018	2.20376	2.36707	2.80854	2.70329	2.60461	2.39237	2.68477	2.96626	3.09268	3.21145	2.5335	2.33593	2.39604	2.09872	2.06482	1.9526	1.79516	1.98614	2.14831	2.32442	2.49337	2.6664	2.83991	3.01427	3.18869	3.36314	3.53743	5.9864	8.59689	11.0412	13.4825	15.5767	17.6184	21.1309	23.3207	24.1263	27.0179	37.3511
[truncated: 25 more columns]

## Sheet: ir_rice
Irrigated rice area (in 1000 km2)
region	-10000	-9000	-8000	-7000	-6000	-5000	-4000	-3000	-2000	-1000	0	100	200	300	400	500	600	700	800	900	1000	1100	1200	1300	1400	1500	1600	1700	1710	1720	1730	1740	1750	1760	1770	1780	1790	1800	1810	1820	1830	1840	1850	1860	1870	1880	1890	1900	1910
1	0	0	0	0	0	0	0	0	0	0	0	0	0	0	0	0	0	0	0	0	0	0	0	0	0	0	0	0	0	0	0	0	0	0	0	0	0	0	0	0	0	0	0	0	0	0	0	0	0
2	0	0	0	0	0	0	0	0	0	0	0	0	0	0	0	0	0	0	0	0	0	0	0	0	0	0	0	0	0	0	0	0	0	0	0	0	0	0.21277	0.551032	1.42869	3.73089	9.7137	25.6564	68.7784	168.071	436.379	1089.24	1460	2700
3	0	0	0	0	0	0	0	0	0	0	0	0	0	0	0	0	0	0	0	0	0	0	0	0	0	0	31.6536	126.615	137.24	147.865	158.491	169.117	179.742	190.368	200.993	211.619	222.244	232.87	243.495	254.121	264.746	275.372	285.997	296.623	307.248	317.874	375.07	430.972	688.8
4	0	0	0	0	0	0	0	0	0	0	0	0	0	0	0	0	0	0	0	0	0	0	0	0	0	0	0	0.470681	0.535034	0.599388	0.663742	0.728096	0.933552	1.2976	1.83016	3.00732	5.15336	9.15995	17.4881	22.7705	26.6566	30.8443	35.4862	41.6686	48.4109	55.1617	66.0866	81.4091	232.507
5	0	0	0	0	0	0	0	0	0	0	0	0	0	0	0	0	0	0	0	0	0	0	0	0	0	0	0	0	0	0	0	0	0	0	0	0	0	0.1004	0.257115	0.631526	1.4895	1.791	2.0925	2.394	2.6955	2.997	3.2985	3.6	738
6	0	0	0	0	0	0	0	0	0	0	0	0	0	0	0	0	0	0	0	0	0	0	0	0	0	0	0	0	0	0	0	0	0.130575	0.258327	0.511069	1.01109	2.16836	4.39995	8.80545	10.865	15.5147	21.8748	31.0091	45.0399	63.9174	94.2637	155.749	233.465	426.693
7	0	0	0	0	0	0	0	0	54.2002	108.4	325.202	349.711	374.173	349.899	325.694	285.341	245.166	278.449	312.191	363.026	415.103	361.828	332.943	390.756	337.008	331.652	416.178	373.378	365.584	357.791	349.997	342.204	334.41	326.617	318.823	311.03	303.236	295.443	328.3	361.156	395.749	430.341	464.933	418.089	477.052	544.142	749.071	528.143	1240.21
8	0	0	0	0	0	0	0	0	0	0	0	0	0	0	0	0.763745	0.954592	1.19313	1.49127	1.86392	2.32968	9.23583	14.4806	34.671	52.7634	73.2379	101.485	176.697	184.731	192.87	201.138	209.559	219.034	228.026	237.325	247.004	257.155	267.569	272.707	278.739	285.91	294.543	305.063	318.04	334.245	354.168	375.234	387.982	550.8
9	0	0	0	0	0	0	0	0	0	0	0	0	0	0	0	0	0	0	0	0	0	0	0	0	0	16.1656	19.5931	2.26301	29.4594	33.6482	37.8369	42.0256	46.128	49.9614	53.7987	57.6405	61.4873	65.34	68.3014	71.2706	74.2489	77.2382	80.2407	83.2595	86.2988	89.3647	92.4662	95.6174	529.59
10	0	0	0	0	0	0	0	0	0	0	0	0	0	0	0	0	0	0	0	0	0	0	0	0	0	0	0	0	0	0	0	0	0	0	0	0	0	0	0	0	0	0	0	0	0	0	0	0	0
11	0	0	0	0	0	0	0	0	0	0	0	0	0	0	0	0	0	0	0	0	216.33	330.817	422.245	603.462	408.378	483.171	659.641	670.68	715.639	746.413	775.981	801.564	827.737	854.346	881.563	908.152	935.411	963.363	1002.21	1040.12	1105.67	1159.46	1241.17	1326.16	1374.87	1459.73	2734.17	2492.59	2390.41
12	0	0	0	0	0	0	0	0	0	0	0	0	0	0	0	0	0	0	0	0	0	0	0	0	0	0	0	18.9966	21.2957	22.8442	24.2257	25.6477	27.1122	28.6212	30.1768	31.7812	33.4367	35.1458	43.1392	51.1924	58.8324	67.2309	75.7207	83.2906	90.8612	103.502	116.34	121.376	219.908
13	0	0	0	0	0	0	0	0	0.143169	0.322129	0.644258	1.04692	1.69118	2.35557	3.26156	4.48464	6.11542	10.0904	16.5116	27.3474	44.891	49.2253	87.073	150.462	121.206	130.61	167.18	177.629	179.704	182.309	184.951	187.631	190.351	193.109	195.908	198.747	201.628	204.55	207.514	210.522	218.477	226.01	233.804	241.866	250.206	255.692	260.91	266.235	271.668
14	0	0	0	0	0	0	0	0	0	0	0	0	0	0	0	0	0	0	0	0	0	0	0	0	0	0	0	0	0	0	0	0	0	0	0	0	0	0	0	0	0	0	0	0	0	0	0	0	0
15	0	0	0	0	0	0	0	0	0	0	0.467776	0.751784	1.20822	2.04341	3.38793	5.44489	8.75071	14.0637	29.273	45.4597	70.515	76.3195	83.2577	93.3397	106.522	124.895	159.196	199.844	215.94	224.812	234.087	243.777	253.893	264.445	275.442	286.89	298.794	311.155	323.97	337.232	350.925	365.026	379.499	394.292	409.332	431.847	453.024	481.569	509.546
16	0	0	0	0	0	0	0	0	0	0	0	0	0	0	0	0	0	0.125146	0.201128	0.318854	0.504024	6.0262	8.91329	9.44136	9.18935	11.8004	14.6875	16.6962	19.8461	23.7064	27.5748	31.4518	35.3381	39.2347	43.1422	47.0616	50.9939	54.9402	81.1971	95.7231	102.394	120.989	131.156	150.438	163.159	187.566	215.306	241.658	299.881
17	0	0	0	0	0	0	0	0	0.389243	0.785327	1.48856	2.3331	3.65004	5.60307	8.59662	12.9634	19.5477	34.9823	60.9645	87.6386	125.746	151.856	193.483	188.359	282.474	326.737	397.096	358.085	409.928	442.422	474.917	507.411	539.905	572.4	604.894	637.388	669.883	702.377	907.238	1112.19	1317.24	1393.79	1438.03	1478.7	1519.62	1713.78	1896.75	2018.56	2130.01
18	0	0	0	0	0	0	260.094	493.788	936.095	1771.81	3347.9	3500.16	3635.98	3455.69	3278.12	3104.28	2934.96	2770.76	2612.17	2459.51	2313.02	2172.84	2039.02	1911.59	1790.46	1675.57	1566.77	1740.85	2242.82	2744.8	3246.77	3748.74	4250.72	4752.69	5254.67	5756.64	6258.61	6760.59	10564.6	13178.2	17348.5	21274.1	29087.7	38222.5	50104.4	62894.7	85433.1	89655.5	79293.1
19	0	0	0	0	0	0	0	0	0	0	0	16.234	36.1637	46.8594	60.7237	78.6849	101.934	131.988	170.772	186.556	200.712	232.413	297.747	213.396	236.206	253.595	293.499	331.825	423.9	515.975	608.049	700.124	792.199	884.274	976.349	1068.42	1160.5	1252.57	1562.85	1873.12	2183.39	2493.66	2751.05	2938.71	3126.37	3313.46	3506.86	3700.34	4259.43
20	0	0	0	0	0	0	196.238	472.578	1136.41	1637.05	8190	8291.25	7757.53	3920.26	5350.64	6617.78	8797.5	7343.77	5744.45	6928.38	6405.96	10947.9	11212.8	11464.8	11716.5	14985	15435.6	15943.1	17792	19823.7	21725.7	23704.2	25644.5	27583.6	29515.4	31447.8	33380.8	35314.3	41538.5	47763.5	53982.9	60204.1	66425.8	71628.1	60805.6	61501	63403.2	67546.8	71836.9
21	0	0	0	0	0	0	0	0	0	2.30322	6.43156	7.04427	7.65143	8.25307	8.84916	9.43971	10.0247	10.6042	11.1782	11.7466	29.5563	55.0986	66.0864	73.4012	84.6485	113.258	144.514	196.205	248.06	298.795	344.877	391.032	437.269	483.598	530.032	576.585	623.276	670.125	1013.74	1300.09	1631.13	2327.15	3029.59	3742.5	4455.65	5205.13	5972.16	6600.68	12885.1
22	0	0	0	0	0	0	0	0	0	0	0	16.921	20.3139	24.2518	28.814	34.0906	40.1841	47.2109	55.303	64.6105	75.3036	92.9674	113.627	137.73	195.117	249.685	283.291	324.738	388.109	451.479	514.85	578.221	641.592	704.962	768.333	831.704	895.074	958.445	1417.22	1491.68	1566.07	1640.39	1714.64	2185.15	2655.22	3124.85	3594.04	4062.79	8961.36
23	0	0	0	0	0	0	0	0	0	0	0	85.3344	117.422	181.189	242.36	356.178	464.666	654.897	800.43	997.938	997.938	1031.2	833.569	913.318	1111.53	1394.17	1809.11	2628.51	2879.67	3130.83	3381.99	3633.15	3884.31	4135.47	4386.63	4637.79	4888.95	5140.11	6915.47	8690.83	10466.2	12241.6	13672.1	13793.6	13866.5	14387.9	17500.2	18005.5	18767
24	0	0	0	0	0	0	0	0	0	0	0	0	0	0	0	0	0	0	0	0	0	0	0	0	0	0	0	0	0	0	0	0	0	0	0	0	0	0	0.633163	0.601798	0.653874	0.840493	1.56183	3.30519	4.91584	6.38107	8.81335	10.5429	13.97
25	0	0	0	0	0	0	18.4207	46.0518	115.129	287.824	725.864	780.01	834.362	899.416	964.819	1030.76	1097.52	1218.1	1340.22	1507.18	1677.67	1763.01	1844.79	1820.84	2054.93	2184.48	2836.35	3478.47	3553.23	3662.87	3773.93	3886.46	4000.46	4115.99	4233.05	4351.7	4471.95	4593.85	5114.11	5262.88	5427.67	5612.78	5813.17	5999.78	6192.99	6372.06	6874.96	7145.6	8331.33
26	0	0	0	0	0	0	0	0	0	0	0	0	0	0	0	0	0	0	0	0	0.513203	0.753389	0.994013	1.23508	8.9535	10.2759	11.2554	17.2671	21.8743	22.9423	24.0213	25.1123	26.2169	27.3366	28.4733	29.6292	30.807	32.01	34.4777	36.9796	39.5241	42.4404	45.4615	47.1687	48.5722	50.1834	52.0705	54.3424	92.577
27	0	0	0	0	0	0	0	0	0	0	0	0	0	0	0	0	0	0	0	0	0	0	0	0	0	0	0	0	0	0	0	0	0	0	0	0	0	0	0	0	0	0	0	0	0	0	0	0	0
Total	0	0	0	0	0	0	474.752	1012.42	2242.36	3808.49	12598	13050.8	12790.1	8895.81	10275.3	11540.2	13727.3	12516.2	11155.2	12681.6	12576.1	17281.4	17551	18006.8	18515.9	22364.3	24347.1	26782.3	29829.6	33026.6	36090.1	39228.1	42331.9	45436.6	48537.4	51641.6	54751.5	57868.6	71666.8	83445.8	96867.6	110311	127271	143509	146556	162902	194928	205625	217369
Percentage of irrigated rice area
region	-10000	-9000	-8000	-7000	-6000	-5000	-4000	-3000	-2000	-1000	0	100	200	300	400	500	600	700	800	900	1000	1100	1200	1300	1400	1500	1600	1700	1710	1720	1730	1740	1750	1760	1770	1780	1790	1800	1810	1820	1830	1840	1850	1860	1870	1880	1890	1900	1910
1	0	0	0	0	0	0	0	0	0	0	0	0	0	0	0	0	0	0	0	0	0	0	0	0	0	0	0	0	0	0	0	0	0	0	0	0	0	0	0	0	0	0	0	0	0	0	0	0	0
2	0	0	0	0	0	0	0	0	0	0	0	0	0	0	0	0	0	0	0	0	0	0	0	0	0	0	0	0	0	0	0	0	0	0	0	0	0	2.34359e-08	6.06944e-08	1.57365e-07	4.10946e-07	1.06993e-06	2.82597e-06	7.57571e-06	1.85125e-05	4.80657e-05	0.000119976	0.000160814	0.000297396
3	0	0	0	0	0	0	0	0	0	0	0	0	0	0	0	0	0	0	0	0	0	0	0	0	0	0	1.62903e-05	6.51614e-05	7.06298e-05	7.60981e-05	8.15665e-05	8.70349e-05	9.25032e-05	9.79716e-05	0.00010344	0.000108908	0.000114377	0.000119845	0.000125313	0.000130782	0.00013625	0.000141719	0.000147187	0.000152655	0.000158124	0.000163592	0.000193028	0.000221797	0.000354487
4	0	0	0	0	0	0	0	0	0	0	0	0	0	0	0	0	0	0	0	0	0	0	0	0	0	0	0	6.40282e-07	7.27824e-07	8.15367e-07	9.02909e-07	9.90452e-07	1.26994e-06	1.76517e-06	2.48962e-06	4.09096e-06	7.01028e-06	1.24606e-05	2.37896e-05	3.09754e-05	3.62618e-05	4.19584e-05	4.8273e-05	5.66832e-05	6.58549e-05	7.50381e-05	8.98996e-05	0.000110743	0.000316286
5	0	0	0	0	0	0	0	0	0	0	0	0	0	0	0	0	0	0	0	0	0	0	0	0	0	0	0	0	0	0	0	0	0	0	0	0	0	1.18916e-08	3.04535e-08	7.48e-08	1.76421e-07	2.12132e-07	2.47842e-07	2.83553e-07	3.19263e-07	3.54974e-07	3.90685e-07	4.26395e-07	8.7411e-05
6	0	0	0	0	0	0	0	0	0	0	0	0	0	0	0	0	0	0	0	0	0	0	0	0	0	0	0	0	0	0	0	0	1.42168e-08	2.81262e-08	5.56443e-08	1.10085e-07	2.36088e-07	4.79059e-07	9.58722e-07	1.18296e-06	1.68921e-06	2.38169e-06	3.37621e-06	4.90386e-06	6.95921e-06	1.02633e-05	1.69576e-05	2.54192e-05	4.64576e-05
7	0	0	0	0	0	0	0	0	9.01177e-06	1.80235e-05	5.40706e-05	5.81458e-05	6.22131e-05	5.8177e-05	5.41525e-05	4.7443e-05	4.07633e-05	4.62971e-05	5.19073e-05	6.03596e-05	6.90184e-05	6.01604e-05	5.53577e-05	6.49702e-05	5.60336e-05	5.51432e-05	6.91972e-05	6.20808e-05	6.0785e-05	5.94892e-05	5.81934e-05	5.68976e-05	5.56018e-05	5.43059e-05	5.30101e-05	5.17143e-05	5.04185e-05	4.91227e-05	5.45857e-05	6.00487e-05	6.58003e-05	7.15519e-05	7.73036e-05	6.95148e-05	7.93184e-05	9.04734e-05	0.000124547	8.78133e-05	0.000206208
8	0	0	0	0	0	0	0	0	0	0	0	0	0	0	0	6.72886e-08	8.41028e-08	1.05119e-07	1.31386e-07	1.64217e-07	2.05253e-07	8.13709e-07	1.27579e-06	3.05463e-06	4.64864e-06	6.45251e-06	8.94116e-06	1.55676e-05	1.62755e-05	1.69925e-05	1.7721e-05	1.84628e-05	1.92976e-05	2.00898e-05	2.09092e-05	2.17619e-05	2.26562e-05	2.35737e-05	2.40265e-05	2.45579e-05	2.51897e-05	2.59503e-05	2.68771e-05	2.80204e-05	2.94481e-05	3.12034e-05	3.30594e-05	3.41826e-05	4.85273e-05
9	0	0	0	0	0	0	0	0	0	0	0	0	0	0	0	0	0	0	0	0	0	0	0	0	0	2.76362e-06	3.34959e-06	3.86878e-07	5.03631e-06	5.7524e-06	6.4685e-06	7.18459e-06	7.88592e-06	8.54127e-06	9.19729e-06	9.85407e-06	1.05117e-05	1.11704e-05	1.16766e-05	1.21842e-05	1.26934e-05	1.32044e-05	1.37177e-05	1.42338e-05	1.47534e-05	1.52776e-05	1.58078e-05	1.63465e-05	9.05374e-05
10	0	0	0	0	0	0	0	0	0	0	0	0	0	0	0	0	0	0	0	0	0	0	0	0	0	0	0	0	0	0	0	0	0	0	0	0	0	0	0	0	0	0	0	0	0	0	0	0	0
11	0	0	0	0	0	0	0	0	0	0	0	0	0	0	0	0	0	0	0	0	5.96749e-05	9.12565e-05	0.000116477	0.000166466	0.000112652	0.000133284	0.000181963	0.000185008	0.00019741	0.000205899	0.000214056	0.000221113	0.000228333	0.000235673	0.000243181	0.000250515	0.000258035	0.000265745	0.000276462	0.000286919	0.000305001	0.000319838	0.000342379	0.000365823	0.000379259	0.000402669	0.000754226	0.000687585	0.0006594
12	0	0	0	0	0	0	0	0	0	0	0	0	0	0	0	0	0	0	0	0	0	0	0	0	0	0	0	1.42021e-05	1.5921e-05	1.70787e-05	1.81115e-05	1.91747e-05	2.02696e-05	2.13977e-05	2.25607e-05	2.37601e-05	2.49979e-05	2.62756e-05	3.22516e-05	3.82723e-05	4.3984e-05	5.02629e-05	5.661e-05	6.22694e-05	6.79293e-05	7.73797e-05	8.6978e-05	9.0743e-05	0.000164407
13	0	0	0	0	0	0	0	0	1.84598e-07	4.15345e-07	8.30691e-07	1.34987e-06	2.18056e-06	3.03721e-06	4.20537e-06	5.78239e-06	7.88507e-06	1.30104e-05	2.12897e-05	3.52611e-05	5.78814e-05	6.34699e-05	0.00011227	0.000194002	0.00015628	0.000168405	0.000215558	0.000229031	0.000231706	0.000235064	0.000238471	0.000241927	0.000245433	0.00024899	0.000252599	0.00025626	0.000259974	0.000263742	0.000267564	0.000271442	0.000281698	0.000291412	0.000301461	0.000311856	0.00032261	0.000329683	0.000336411	0.000343276	0.000350282
14	0	0	0	0	0	0	0	0	0	0	0	0	0	0	0	0	0	0	0	0	0	0	0	0	0	0	0	0	0	0	0	0	0	0	0	0	0	0	0	0	0	0	0	0	0	0	0	0	0
15	0	0	0	0	0	0	0	0	0	0	1.20292e-07	1.93326e-07	3.10703e-07	5.25476e-07	8.7123e-07	1.40019e-06	2.25031e-06	3.61657e-06	7.52775e-06	1.16903e-05	1.81334e-05	1.96261e-05	2.14103e-05	2.4003e-05	2.73928e-05	3.21176e-05	4.09385e-05	5.13913e-05	5.55305e-05	5.78119e-05	6.0197e-05	6.26889e-05	6.52904e-05	6.8004e-05	7.08318e-05	7.37758e-05	7.6837e-05	8.00157e-05	8.33112e-05	8.67215e-05	9.02428e-05	9.3869e-05	9.75909e-05	0.000101395	0.000105263	0.000111052	0.000116498	0.000123839	0.000131033
16	0	0	0	0	0	0	0	0	0	0	0	0	0	0	0	0	0	7.57656e-09	1.21766e-08	1.93039e-08	3.05144e-08	3.64836e-07	5.39626e-07	5.71596e-07	5.56338e-07	7.14415e-07	8.89205e-07	1.01082e-06	1.20151e-06	1.43523e-06	1.66942e-06	1.90414e-06	2.13943e-06	2.37533e-06	2.6119e-06	2.84919e-06	3.08725e-06	3.32617e-06	4.91581e-06	5.79524e-06	6.19912e-06	7.32487e-06	7.94041e-06	9.10779e-06	9.87792e-06	1.13555e-05	1.3035e-05	1.46304e-05	1.81553e-05
17	0	0	0	0	0	0	0	0	7.52446e-08	1.51812e-07	2.87753e-07	4.51012e-07	7.05591e-07	1.08313e-06	1.66181e-06	2.50595e-06	3.77878e-06	6.76244e-06	1.17851e-05	1.69414e-05	2.4308e-05	2.93554e-05	3.74022e-05	3.64117e-05	5.46051e-05	6.31616e-05	7.67627e-05	6.92214e-05	7.92433e-05	8.55248e-05	9.18063e-05	9.80878e-05	0.000104369	0.000110651	0.000116932	0.000123214	0.000129495	0.000135777	0.000175378	0.000214998	0.000254636	0.000269434	0.000277986	0.000285848	0.000293759	0.000331291	0.000366661	0.000390209	0.000411754
18	0	0	0	0	0	0	8.22004e-05	0.000156057	0.000295845	0.000559963	0.00105807	0.00110619	0.00114912	0.00109214	0.00103602	0.000981081	0.000927567	0.000875676	0.000825553	0.000777306	0.000731009	0.000686705	0.000644416	0.00060414	0.000565861	0.000529549	0.000495163	0.000550181	0.000708825	0.000867469	0.00102611	0.00118476	0.0013434	0.00150205	0.00166069	0.00181934	0.00197798	0.00213662	0.00333885	0.00416484	0.00548284	0.00672349	0.00919293	0.0120799	0.0158351	0.0198773	0.0270004	0.0283348	0.0250599
19	0	0	0	0	0	0	0	0	0	0	0	6.8663e-05	0.000152957	0.000198196	0.000256836	0.000332804	0.000431136	0.000558254	0.000722292	0.000789054	0.000848927	0.000983012	0.00125934	0.000902575	0.00099905	0.0010726	0.00124138	0.00140348	0.00179292	0.00218236	0.00257179	0.00296123	0.00335067	0.00374011	0.00412955	0.00451899	0.00490843	0.00529786	0.00661018	0.00792251	0.00923483	0.0105471	0.0116358	0.0124295	0.0132233	0.0140145	0.0148326	0.0156509	0.0180156
20	0	0	0	0	0	0	1.80262e-05	4.34107e-05	0.00010439	0.000150378	0.000752328	0.000761628	0.000712601	0.000360112	0.000491506	0.000607905	0.000808132	0.000674593	0.000527681	0.000636436	0.000588447	0.00100566	0.00103	0.00105315	0.00107627	0.00137652	0.0014179	0.00146452	0.00163436	0.00182099	0.00199571	0.00217745	0.00235568	0.00253381	0.00271127	0.00288877	0.00306633	0.00324395	0.0038157	0.00438752	0.00495883	0.00553031	0.00610183	0.0065797	0.00558556	0.00564944	0.00582418	0.0062048	0.00659888
21	0	0	0	0	0	0	0	0	0	8.9381e-07	2.4959e-06	2.73367e-06	2.96929e-06	3.20277e-06	3.43409e-06	3.66327e-06	3.8903e-06	4.11518e-06	4.33791e-06	4.55849e-06	1.14699e-05	2.13821e-05	2.56461e-05	2.84848e-05	3.28495e-05	4.39521e-05	5.60814e-05	7.61411e-05	9.62647e-05	0.000115953	0.000133836	0.000151748	0.000169691	0.00018767	0.000205689	0.000223755	0.000241875	0.000260055	0.000393402	0.000504526	0.000632992	0.000903096	0.00117569	0.00145235	0.0017291	0.00201996	0.00231762	0.00256152	0.0050003
22	0	0	0	0	0	0	0	0	0	0	0	7.00493e-06	8.4095e-06	1.00397e-05	1.19284e-05	1.41128e-05	1.66354e-05	1.95443e-05	2.28942e-05	2.67474e-05	3.11741e-05	3.84865e-05	4.7039e-05	5.7017e-05	8.07741e-05	0.000103364	0.000117276	0.000134434	0.000160669	0.000186903	0.000213137	0.000239371	0.000265605	0.000291839	0.000318073	0.000344307	0.000370541	0.000396776	0.000586698	0.000617523	0.00064832	0.000679087	0.000709826	0.000904606	0.0010992	0.00129362	0.00148786	0.00168191	0.00370981
23	0	0	0	0	0	0	0	0	0	0	0	0.000202544	0.000278705	0.000430058	0.000575248	0.000845401	0.0011029	0.00155442	0.00189985	0.00236864	0.00236864	0.00244759	0.0019785	0.00216779	0.00263825	0.00330911	0.00429399	0.00623886	0.00683499	0.00743113	0.00802726	0.0086234	0.00921954	0.00981567	0.0104118	0.0110079	0.0116041	0.0122002	0.0164141	0.020628	0.0248419	0.0290558	0.0324511	0.0327396	0.0329126	0.0341501	0.0415373	0.0427367	0.0445442
24	0	0	0	0	0	0	0	0	0	0	0	0	0	0	0	0	0	0	0	0	0	0	0	0	0	0	0	0	0	0	0	0	0	0	0	0	0	0	7.88057e-08	7.49019e-08	8.13834e-08	1.04611e-07	1.94391e-07	4.11375e-07	6.11843e-07	7.9421e-07	1.09694e-06	1.31221e-06	1.73876e-06
25	0	0	0	0	0	0	9.99276e-06	2.49819e-05	6.24547e-05	0.000156137	0.000393762	0.000423135	0.000452619	0.00048791	0.000523389	0.00055916	0.000595378	0.000660787	0.000727035	0.000817607	0.000910093	0.000956386	0.00100075	0.000987756	0.00111475	0.00118502	0.00153865	0.00188698	0.00192753	0.00198701	0.00204726	0.0021083	0.00217015	0.00223282	0.00229632	0.00236068	0.00242592	0.00249204	0.00277427	0.00285497	0.00294437	0.00304479	0.00315349	0.00325472	0.00335954	0.00345668	0.00372948	0.0038763	0.00451953
26	0	0	0	0	0	0	0	0	0	0	0	0	0	0	0	0	0	0	0	0	9.16391e-08	1.34527e-07	1.77494e-07	2.20539e-07	1.59876e-06	1.8349e-06	2.0098e-06	3.08326e-06	3.90594e-06	4.09665e-06	4.28931e-06	4.48414e-06	4.68137e-06	4.88131e-06	5.08428e-06	5.29068e-06	5.50099e-06	5.71579e-06	6.15644e-06	6.60319e-06	7.05753e-06	7.57828e-06	8.11774e-06	8.42258e-06	8.67319e-06	8.96089e-06	9.29787e-06	9.70354e-06	1.65308e-05
27	0	0	0	0	0	0	0	0	0	0	0	0	0	0	0	0	0	0	0	0	0	0	0	0	0	0	0	0	0	0	0	0	0	0	0	0	0	0	0	0	0	0	0	0	0	0	0	0	0
Total	0	0	0	0	0	0	3.64159e-06	7.76577e-06	1.72001e-05	2.92131e-05	9.66331e-05	0.000100106	9.8107e-05	6.82354e-05	7.88165e-05	8.85194e-05	0.000105296	9.60059e-05	8.55657e-05	9.72742e-05	9.64651e-05	0.000132558	0.000134625	0.000138121	0.000142027	0.000171546	0.000186754	0.000205434	0.000228808	0.000253331	0.000276829	0.0003009	0.000324708	0.000348522	0.000372307	0.000396118	0.000419972	0.000443882	0.000549721	0.000640072	0.000743024	0.000846144	0.000976234	0.00110079	0.00112416	0.00124954	0.0014952	0.00157725	0.00166733
Irrigated rice area per capita (ha/cap)
region	-10000	-9000	-8000	-7000	-6000	-5000	-4000	-3000	-2000	-1000	0	100	200	300	400	500	600	700	800	900	1000	1100	1200	1300	1400	1500	1600	1700	1710	1720	1730	1740	1750	1760	1770	1780	1790	1800	1810	1820	1830	1840	1850	1860	1870	1880	1890	1900	1910
1	0	0	0	0	0	0	0	0	0	0	0	0	0	0	0	0	0	0	0	0	0	0	0	0	0	0	0.0158268	0.0633072	0.0603824	0.0559483	0.0514231	0.0469218	0.0425352	0.0383311	0.0343579	0.0306473	0.0272173	0.0240748	0.0212179	0.0184798	0.0160307	0.0138529	0.0119275	0.00873022	0.00789345	0.00700662	0.00735521	0.00782073	0.00951497
2	0	0	0	0	0	0	0	0	0	0	0	0	0	0	0	0	0	0	0	0	0	0	0	0	0	0	0	5.077e-05	3.89736e-05	3.29604e-05	2.93142e-05	2.68676e-05	2.95833e-05	3.60301e-05	4.52211e-05	6.69364e-05	0.000104348	0.000145084	0.000213911	0.000214851	0.000192629	0.00017122	0.000149162	0.000130672	0.000124253	0.000109057	0.000104688	0.000106816	0.000253822
3	0	0	0	0	0	0	0	0	0	0	0	0	0	0	0	0	0	0	0	0	0	0	0	0	0	0	0	0	0	0	0	0	0	0	0	0	0	1.36472e-06	3.34241e-06	7.86636e-06	1.78087e-05	2.05873e-05	2.31594e-05	2.55471e-05	2.77698e-05	2.98439e-05	2.78373e-05	2.64409e-05	0.00486808
4	0	0	0	0	0	0	0	0	0	0	0	0	0	0	0	0	0	0	0	0	0	0	0	0	0	0	0	0	0	0	0	0	6.10919e-06	1.12479e-05	2.05555e-05	3.70826e-05	7.20688e-05	0.000131654	0.000234683	0.000261087	0.000322244	0.000404327	0.000506486	0.00066738	0.000851581	0.00112705	0.00166877	0.00223257	0.00342657
5	0	0	0	0	0	0	0	0	0.00148299	0.00225981	0.00516527	0.00518424	0.0051771	0.0045185	0.00392548	0.00320987	0.00257406	0.00272861	0.0028553	0.00326057	0.00366162	0.0028791	0.00241296	0.00260004	0.00207266	0.00176995	0.0468797	0.0677313	0.0576486	0.0487912	0.0410586	0.0343503	0.02857	0.023624	0.0194218	0.0158767	0.0129073	0.0104372	0.00905779	0.00811363	0.00700107	0.00627141	0.00575385	0.00449092	0.00452035	0.00463482	0.00513635	0.00298884	0.00556787
6	0	0	0	0	0	0	0	0	0	0	0	0	0	0	0	1.49697e-05	1.75679e-05	2.06112e-05	2.41745e-05	2.73359e-05	3.11848e-05	0.000112651	0.000162257	0.000359039	0.000507844	0.00065842	0.00184777	0.00330269	0.00339255	0.00348019	0.00356613	0.00365078	0.00374963	0.00383587	0.00392318	0.00401255	0.0041052	0.00419757	0.00419509	0.00399368	0.00346988	0.00312731	0.00278372	0.00246788	0.00233139	0.00211446	0.00180543	0.00160518	0.00190403
7	0	0	0	0	0	0	0	0	0	0	0	0	0	0	0	0	0	0	0	0	0	0	0	0	0	0.000194758	0.000178114	2.43316e-05	0.000315993	0.00035816	0.000399662	0.000440492	0.000479759	0.000515589	0.000550848	0.000585527	0.000619626	0.000653117	0.00064513	0.000635759	0.000589672	0.000552643	0.000522236	0.000528408	0.000494367	0.000463884	0.000405415	0.000370252	0.00186112
8	0	0	0	0	0	0	0	0	0	0	0	0	0	0	0	0	0	0	0	0	0	0	0	0	0	0	0	0	0	0	0	0	0	0	0	0	0	0	0	0	0	0	0	0	0	0	0	0	0
9	0	0	0	0	0	0	0	0	0	0	0	0	0	0	0	0	0	0	0	0	0.00262991	0.00371268	0.00440047	0.00577353	0.00361098	0.00394416	0.00492367	0.00461101	0.00484891	0.00499634	0.0051298	0.00523119	0.00533066	0.0054268	0.0055201	0.00560224	0.00567964	0.00575309	0.00588187	0.0059932	0.00585577	0.00567439	0.00563778	0.00557716	0.00540162	0.00536574	0.00942692	0.00805789	0.00723625
10	0	0	0	0	0	0	0	0	0	0	0	0	0	0	0	0	0	0	0	0	0	0	0	0	0	0	0	0.00220872	0.0025237	0.0027603	0.00298584	0.00322567	0.00348096	0.00375292	0.00404297	0.00435261	0.00468348	0.00503745	0.00633044	0.00769547	0.00906524	0.010625	0.0101666	0.00907096	0.00746087	0.00429473	0.00393282	0.00294176	0.00397312
11	0	0	0	0	0	0	0	0	3.43729e-06	3.70372e-06	2.54503e-06	3.97185e-06	6.18788e-06	9.13444e-06	1.34502e-05	2.17255e-05	3.62171e-05	5.42322e-05	8.00732e-05	0.000118632	0.000174979	0.000157913	0.000205883	0.000244195	0.000297747	0.000244585	0.00023843	0.000223465	0.000212177	0.000206662	0.000201279	0.000196393	0.000191904	0.000187704	0.000183822	0.000179547	0.000174992	0.000171271	0.000166186	0.000157038	0.000149862	0.000143325	0.000140518	0.000137458	0.000134352	0.000127356	0.000121445	0.000114478	0.000107013
12	0	0	0	0	0	0	0	0	0	0	0	0	0	0	0	0	0	0	0	0	0	0	0	0	0	0	0	0	0	0	0	0	0	0	0	0	0	0	0	0	0	0	0	0	0	0	0	0	0
13	0	0	0	0	0	0	0	0	0	0	7.79626e-06	1.15659e-05	1.72604e-05	3.14371e-05	5.64654e-05	9.89978e-05	0.000175014	0.000255702	0.000487882	0.000686185	0.000972621	0.00143999	0.00133213	0.00129639	0.00183658	0.00199833	0.00198995	0.00235111	0.00251113	0.00257695	0.00264494	0.00271508	0.00278735	0.00286173	0.00293815	0.00301653	0.00309682	0.00317886	0.0032625	0.00334754	0.00335664	0.00337512	0.00339199	0.00340674	0.00341879	0.00352946	0.00362848	0.00377998	0.00391958
14	0	0	0	0	0	0	0	0	0	0	0	0	0	0	0	0	0	1.26538e-05	1.89654e-05	2.80618e-05	4.15862e-05	0.000331474	0.000326853	0.000346217	0.000336976	0.000324543	0.000323155	0.000275515	0.000301063	0.0003387	0.000371	0.000398445	0.000421478	0.000440511	0.000455918	0.000468054	0.000477239	0.000483771	0.000672612	0.000738055	0.000733508	0.000797262	0.000817042	0.000832777	0.000811104	0.000808496	0.000804444	0.0007609	0.00078586
15	0	0	0	0	0	0	0	0	4.00026e-05	6.91784e-05	0.000112393	0.000164415	0.000240073	0.000343961	0.000492546	0.000693225	0.000975643	0.0016296	0.00265061	0.00368225	0.00511156	0.00585854	0.00707676	0.00635046	0.00877229	0.0093351	0.00992713	0.00797498	0.00880964	0.00921573	0.00958015	0.00990363	0.0101871	0.0104321	0.0106397	0.0108114	0.0109486	0.0110531	0.0137361	0.0161896	0.0184217	0.0187146	0.0185262	0.0182665	0.0179891	0.0185264	0.0189728	0.0180029	0.0171059
16	0	0	0	0	0	0	0.0328208	0.053408	0.0867812	0.140783	0.22799	0.213629	0.20087	0.174187	0.151726	0.141722	0.131759	0.114083	0.098425	0.0866945	0.0765905	0.0479664	0.0305705	0.0268523	0.0260701	0.0190172	0.0143085	0.0139664	0.0167539	0.0184168	0.019764	0.020873	0.0217979	0.0225779	0.02324	0.0238067	0.0242927	0.0247113	0.0364719	0.0425969	0.0524082	0.0547072	0.0690365	0.0793797	0.0959885	0.105182	0.124867	0.116982	0.0838853
17	0	0	0	0	0	0	0	0	0	0	0	0.000142349	0.000273883	0.000303019	0.000408274	0.000539276	0.000697114	0.000923117	0.00121066	0.00127671	0.00154503	0.0018006	0.00228166	0.00186506	0.00218185	0.00220706	0.00215746	0.00260197	0.00326152	0.00391599	0.00455148	0.00516806	0.00576587	0.00634494	0.00690534	0.00744714	0.00797045	0.00847515	0.0103877	0.0122219	0.0136524	0.0149704	0.0158713	0.0163056	0.0166217	0.0158877	0.015332	0.0151315	0.0163614
18	0	0	0	0	0	0	0.00394785	0.0048239	0.00588572	0.00430201	0.0109203	0.0105289	0.00940333	0.00454534	0.00594532	0.00705913	0.00902332	0.00725326	0.00547102	0.00637107	0.00569431	0.00941768	0.00934416	0.00926469	0.00918956	0.0114173	0.0114338	0.00966253	0.0105487	0.0115032	0.0123443	0.0131935	0.013988	0.0147507	0.0154803	0.0161826	0.0168591	0.0175114	0.0202301	0.0232995	0.0249924	0.0283982	0.0286321	0.0293559	0.0237523	0.0239118	0.0226742	0.0237423	0.027206
19	0	0	0	0	0	0	0	0	0	0.00143382	0.00320305	0.00264379	0.00216131	0.00175234	0.00141052	0.00112814	0.000897148	0.000709777	0.000558908	0.000522069	0.00118225	0.00183662	0.00165216	0.00244671	0.00241853	0.00283146	0.00289027	0.00313927	0.00361083	0.00408516	0.00442849	0.0047155	0.00495173	0.00514229	0.00529183	0.00540467	0.00548476	0.00553573	0.00786063	0.00946207	0.0117109	0.0166587	0.021623	0.0264723	0.031237	0.0363188	0.0414012	0.0454614	0.0872617
20	0	0	0	0	0	0	0	0	0	0	0	3.2648e-05	4.66038e-05	0.00010857	9.44011e-05	9.03096e-05	7.93436e-05	0.000111943	0.000166062	0.000160804	0.000201514	0.000101726	0.000108723	0.000170058	0.000270828	0.000271189	0.000286545	0.00032142	0.000366891	0.000372212	0.000399366	0.000399029	0.000355786	0.000354031	0.000345647	0.000299256	0.000297315	0.000325526	0.000411456	0.0004198	0.00040047	0.000396569	0.000396855	0.000514271	0.000735227	0.000854964	0.00095321	0.00101063	0.00210574
21	0	0	0	0	0	0	0	0	0	0	0	0.00300281	0.00381278	0.00544685	0.0067622	0.00923987	0.0112174	0.0147108	0.0167085	0.0196735	0.0186377	0.01575	0.0107676	0.0109582	0.0116055	0.0128859	0.0142036	0.0177546	0.0187593	0.0196612	0.0204989	0.0212791	0.0220066	0.0226867	0.023323	0.0239194	0.024479	0.0250044	0.0319011	0.0381183	0.0423796	0.0457187	0.04721	0.0425291	0.0386115	0.0351882	0.0381297	0.0352873	0.0323746
22	0	0	0	0	0	0	0	0	0	0	0	0	0	0	0	0	0	0	0	0	0	0	0	0	0	0	0	0	0	0	0	0	0	0	0	0	0	0	4.28688e-06	3.8847e-06	4.03261e-06	4.96176e-06	8.84092e-06	1.49594e-05	1.85433e-05	2.06331e-05	2.49363e-05	2.6516e-05	2.93616e-05
23	0	0	0	0	0	0	0.031085	0.0518082	0.0863472	0.143912	0.241954	0.156002	0.119195	0.0817653	0.0643213	0.0458117	0.0365842	0.027069	0.0243677	0.0235498	0.0279612	0.0284356	0.028825	0.024943	0.0220961	0.0177599	0.0166845	0.013028	0.0122525	0.0126306	0.0130136	0.0134016	0.0137947	0.0142916	0.0148009	0.0153229	0.015858	0.0164066	0.0177573	0.01778	0.0178542	0.0179897	0.0181662	0.0180861	0.0180307	0.0173121	0.0171543	0.0159592	0.0165409
24	0	0	0	0	0	0	0	0	0	0	0	0	0	0	0	0	0	0	0	0	0.000174592	0.000251516	0.000308555	0.000368826	0.00258928	0.0024479	0.00225957	0.00299426	0.00382604	0.0039712	0.00411078	0.00424413	0.00437056	0.00448915	0.00459896	0.00469881	0.00478387	0.0048515	0.00526075	0.00538708	0.00524607	0.00484663	0.00378874	0.00247653	0.00189302	0.00157557	0.00122382	0.00107201	0.00155738
25	0	0	0	0	0	0	0	0	0	0	0	0	0	0	0	0	0	0	0	0	0	0	0	0	0	0	0	0	0	0	0	0	0	0	0	0	0	0	0	0	0	0	0	0	0	0	0	0	0
26	0	0	0	0	0	0	0	0	0	0	0	0	0	0	0	0	0	0	0	0	0	0	0	0	0	0	0	0	0	0	0	0	0	0	0	0	0	0	0	0	0	0	0	0	0	0	0	0	0
27	0	0	0	0	0	0	0	0	0	0	0	0	0	0	0	0	0	0	0	0	0	0	0	0	0	0	0	0	0	0	0	0	0	0	0	0	0	0	0	0	0	0	0	0	0	0	0	0	0
Total	0	0	0	0	0	0	0	0	0	0	0	0	0	0	0	0	0	0	0	0	0	0	0	0	0	0	0	0	0	0	0	0	0	0	0	0	0	0	0	0	0	0	0	0	0	0	0	0	0
in km2	-10000	-9000	-8000	-7000	-6000	-5000	-4000	-3000	-2000	-1000	0	100	200	300	400	500	600	700	800	900	1000	1100	1200	1300	1400	1500	1600	1700	1710	1720	1730	1740	1750	1760	1770	1780	1790	1800	1810	1820	1830	1840	1850	1860	1870	1880	1890	1900	1910
North America	0	0	0	0	0	0	0	0	0	0	0	0	0	0	0	0	0	0	0	0	0	0	0	0	0	0	0	0	0	0	0	0	0	0	0	0	0	0.21277	0.551032	1.42869	3.73089	9.7137	25.6564	68.7784	168.071	436.379	1089.24	1460	2700
Latin America	0	0	0	0	0	0	0	0	0	0	0	0	0	0	0	0	0	0	0	0	0	0	0	0	0	0	31.6536	127.085	137.775	148.465	159.155	169.845	180.806	191.924	203.334	215.637	229.566	246.53	270.046	288.388	308.407	329.882	354.585	385.725	422.272	470.296	600.204	749.446	2086
Europe	0	0	0	0	0	0	0	0	0	0	0	0	0	0	0	0	0	0	0	0	216.33	330.817	422.245	603.462	408.378	483.171	659.641	689.676	736.934	769.257	800.206	827.212	854.85	882.967	911.74	939.933	968.847	998.509	1045.35	1091.31	1164.5	1226.69	1316.89	1409.45	1465.73	1563.23	2850.51	2613.96	2610.32
USSR	0	0	0	0	0	0	0	0	0	0	0.467776	0.751784	1.20822	2.04341	3.38793	5.44489	8.75071	14.1888	29.4741	45.7786	71.019	82.3456	92.171	102.781	115.711	136.695	173.884	216.54	235.786	248.518	261.661	275.229	289.231	303.68	318.584	333.952	349.788	366.095	405.167	432.955	453.319	486.015	510.655	544.731	572.491	619.413	668.33	723.227	809.428
N.Africa_M.East	0	0	0	0	0	0	0	0	54.7327	109.508	327.334	353.091	379.515	357.858	337.552	302.789	270.829	323.521	389.667	478.012	585.74	562.909	613.498	729.577	740.687	788.999	980.454	909.092	955.217	982.522	1009.86	1037.25	1064.67	1092.13	1119.63	1147.17	1174.75	1202.37	1443.05	1683.87	1931.47	2050.14	2136.77	2138.65	2246.88	2513.61	2906.73	2812.94	3641.9
Tropical Africa	0	0	0	0	0	0	0	0	0	0	0	0	0	0	0	0.763745	0.954592	1.19313	1.49127	1.86392	2.84288	9.98922	15.4746	35.906	61.7169	99.6794	132.333	196.227	236.065	249.461	262.996	276.697	291.378	305.324	319.597	334.274	349.449	364.919	375.487	386.989	399.683	414.222	430.765	448.468	469.116	493.716	519.771	537.942	1172.97
China	0	0	0	0	0	0	196.238	472.578	1136.41	1637.05	8190	8307.48	7793.69	3967.12	5411.36	6696.47	8899.43	7475.76	5915.22	7114.94	6606.67	11180.3	11510.6	11678.2	11952.8	15238.6	15729.1	16274.9	18215.9	20339.6	22333.8	24404.3	26436.7	28467.9	30491.8	32516.2	34541.2	36566.9	43101.4	49636.6	56166.2	62697.8	69176.9	74566.8	63932	64814.4	66910.1	71247.2	76096.3
South Asia	0	0	0	0	0	0	260.094	493.788	936.095	1771.81	3347.9	3500.16	3635.98	3455.69	3278.12	3104.28	2934.96	2770.76	2612.17	2459.51	2313.02	2172.84	2039.02	1911.59	1790.46	1675.57	1566.77	1740.85	2242.82	2744.8	3246.77	3748.74	4250.72	4752.69	5254.67	5756.64	6258.61	6760.59	10564.6	13178.2	17348.5	21274.1	29087.7	38222.5	50104.4	62894.7	85433.1	89655.5	79293.1
SE Asia	0	0	0	0	0	0	18.4207	46.0518	115.129	290.127	732.296	803.975	862.327	931.921	1002.48	1074.29	1147.73	1275.92	1406.7	1583.54	1782.53	1911.07	2024.51	2031.97	2334.7	2547.42	3264.16	3999.41	4189.4	4413.14	4633.66	4855.71	5079.32	5304.55	5531.42	5759.99	5990.3	6222.42	7545.07	8054.65	8624.87	9580.32	10557.4	11927.4	13303.9	14702	16441.2	17809.1	30177.8
Pacific Dev.	0	0	0	0	0	0	0	0	0	0	0	85.3344	117.422	181.189	242.36	356.178	464.666	654.897	800.43	997.938	997.938	1031.2	833.569	913.318	1111.53	1394.17	1809.11	2628.51	2879.67	3130.83	3381.99	3633.15	3884.31	4135.47	4386.63	4637.79	4888.95	5140.11	6916.1	8691.43	10466.9	12242.4	13673.6	13796.9	13871.4	14394.3	17509	18016.1	18781
Total	0	0	0	0	0	0	474.752	1012.42	2242.36	3808.49	12598	13050.8	12790.1	8895.81	10275.3	11540.2	13727.3	12516.2	11155.2	12681.6	12576.1	17281.4	17551	18006.8	18515.9	22364.3	24347.1	26782.3	29829.6	33026.6	36090.1	39228.1	42331.9	45436.6	48537.4	51641.6	54751.5	57868.6	71666.8	83445.8	96867.6	110311	127271	143509	146556	162902	194928	205625	217369
check	#DIV/0!	#DIV/0!	#DIV/0!	#DIV/0!	#DIV/0!	#DIV/0!	1	1	1	1	1	1	1	1	1	1	1	1	1	1	1	1	1	1	1	1	1	1	1	1	1	1	1	1	1	1	1	1	1	1	1	1	1	1	1	1	1	1	1
in Mha	-10000	-9000	-8000	-7000	-6000	-5000	-4000	-3000	-2000	-1000	0	100	200	300	400	500	600	700	800	900	1000	1100	1200	1300	1400	1500	1600	1700	1710	1720	1730	1740	1750	1760	1770	1780	1790	1800	1810	1820	1830	1840	1850	1860	1870	1880	1890	1900	1910
North America	0	0	0	0	0	0	0	0	0	0	0	0	0	0	0	0	0	0	0	0	0	0	0	0	0	0	0	0	0	0	0	0	0	0	0	0	0	2.1277e-05	5.51032e-05	0.000142869	0.000373089	0.00097137	0.00256564	0.00687784	0.0168071	0.0436379	0.108924	0.146	0.27
Latin America	0	0	0	0	0	0	0	0	0	0	0	0	0	0	0	0	0	0	0	0	0	0	0	0	0	0	0.00316536	0.0127085	0.0137775	0.0148465	0.0159155	0.0169845	0.0180806	0.0191924	0.0203334	0.0215637	0.0229566	0.024653	0.0270046	0.0288388	0.0308407	0.0329882	0.0354585	0.0385725	0.0422272	0.0470296	0.0600204	0.0749446	0.2086
Europe	0	0	0	0	0	0	0	0	0	0	0	0	0	0	0	0	0	0	0	0	0.021633	0.0330817	0.0422245	0.0603462	0.0408378	0.0483171	0.0659641	0.0689676	0.0736934	0.0769257	0.0800206	0.0827212	0.085485	0.0882967	0.091174	0.0939933	0.0968847	0.0998509	0.104535	0.109131	0.11645	0.122669	0.131689	0.140945	0.146573	0.156323	0.285051	0.261396	0.261032
USSR	0	0	0	0	0	0	0	0	0	0	4.67777e-05	7.51784e-05	0.000120822	0.000204341	0.000338793	0.000544489	0.000875071	0.00141888	0.00294741	0.00457786	0.0071019	0.00823456	0.0092171	0.0102781	0.0115711	0.0136695	0.0173884	0.021654	0.0235786	0.0248518	0.0261661	0.0275229	0.0289231	0.030368	0.0318584	0.0333952	0.0349788	0.0366095	0.0405167	0.0432955	0.0453319	0.0486015	0.0510655	0.0544731	0.0572491	0.0619413	0.066833	0.0723227	0.0809428
N.Africa_M.East	0	0	0	0	0	0	0	0	0.00547327	0.0109508	0.0327334	0.0353091	0.0379515	0.0357858	0.0337552	0.0302789	0.0270829	0.0323521	0.0389667	0.0478012	0.058574	0.0562909	0.0613498	0.0729577	0.0740687	0.0788999	0.0980454	0.0909092	0.0955217	0.0982522	0.100986	0.103725	0.106467	0.109213	0.111963	0.114717	0.117475	0.120237	0.144305	0.168387	0.193147	0.205014	0.213677	0.213865	0.224688	0.251361	0.290673	0.281294	0.36419
Tropical Africa	0	0	0	0	0	0	0	0	0	0	0	0	0	0	0	7.63745e-05	9.54592e-05	0.000119313	0.000149127	0.000186392	0.000284288	0.000998922	0.00154746	0.0035906	0.00617169	0.00996794	0.0132333	0.0196227	0.0236065	0.0249461	0.0262996	0.0276697	0.0291378	0.0305324	0.0319597	0.0334274	0.0349449	0.0364919	0.0375487	0.0386989	0.0399683	0.0414222	0.0430765	0.0448468	0.0469116	0.0493716	0.0519771	0.0537942	0.117297
China	0	0	0	0	0	0	0.0196238	0.0472578	0.113641	0.163705	0.819	0.830748	0.779369	0.396712	0.541136	0.669647	0.889943	0.747576	0.591522	0.711494	0.660667	1.11803	1.15106	1.16782	1.19528	1.52386	1.57291	1.62749	1.82159	2.03396	2.23338	2.44043	2.64367	2.84679	3.04918	3.25162	3.45412	3.65669	4.31014	4.96366	5.61662	6.26978	6.91769	7.45668	6.3932	6.48144	6.69101	7.12472	7.60963
South Asia	0	0	0	0	0	0	0.0260094	0.0493788	0.0936095	0.177181	0.33479	0.350016	0.363598	0.345569	0.327812	0.310428	0.293496	0.277076	0.261217	0.245951	0.231302	0.217283	0.203902	0.191159	0.179046	0.167557	0.156677	0.174085	0.224282	0.27448	0.324677	0.374874	0.425072	0.475269	0.525467	0.575664	0.625861	0.676059	1.05646	1.31782	1.73485	2.12741	2.90877	3.82225	5.01044	6.28947	8.54331	8.96555	7.92931
SE Asia	0	0	0	0	0	0	0.00184207	0.00460518	0.0115129	0.0290127	0.0732296	0.0803975	0.0862327	0.0931921	0.100248	0.107429	0.114773	0.127592	0.14067	0.158354	0.178253	0.191107	0.202451	0.203197	0.23347	0.254742	0.326416	0.399941	0.41894	0.441314	0.463366	0.485571	0.507932	0.530455	0.553142	0.575999	0.59903	0.622242	0.754507	0.805465	0.862487	0.958032	1.05574	1.19274	1.33039	1.4702	1.64412	1.78091	3.01778
Pacific Dev.	0	0	0	0	0	0	0	0	0	0	0	0.00853344	0.0117422	0.0181189	0.024236	0.0356178	0.0464666	0.0654897	0.080043	0.0997938	0.0997938	0.10312	0.0833569	0.0913318	0.111153	0.139417	0.180911	0.262851	0.287967	0.313083	0.338199	0.363315	0.388431	0.413547	0.438663	0.463779	0.488895	0.514011	0.69161	0.869143	1.04669	1.22424	1.36736	1.37969	1.38714	1.43943	1.7509	1.80161	1.8781
Total	0	0	0	0	0	0	0.0474752	0.101242	0.224236	0.380849	1.2598	1.30508	1.27901	0.889581	1.02753	1.15402	1.37273	1.25162	1.11552	1.26816	1.25761	1.72814	1.7551	1.80068	1.85159	2.23643	2.43471	2.67823	2.98296	3.30266	3.60901	3.92281	4.23319	4.54366	4.85374	5.16416	5.47515	5.78686	7.16668	8.34458	9.68676	11.0311	12.7271	14.3509	14.6556	16.2902	19.4928	20.5625	21.7369
[truncated: 25 more columns]

## Sheet: total_rainfed
Total rainfed cropland area (in 1000km2)
region	-10000	-9000	-8000	-7000	-6000	-5000	-4000	-3000	-2000	-1000	0	100	200	300	400	500	600	700	800	900	1000	1100	1200	1300	1400	1500	1600	1700	1710	1720	1730	1740	1750	1760	1770	1780	1790	1800	1810	1820	1830	1840	1850	1860	1870	1880	1890	1900	1910
1	0	0	0	0	0	0	0	0	0	0	0	0	0	0	0	0	0	0	0	0	0	0	0	0	0	0	0	205.032	265.519	344.206	446.666	580.21	754.431	981.934	1279.28	2202.72	2979.21	4343.76	5906.21	8092.02	11159.5	15500.9	21617.8	35212.1	48854.4	60622.4	76064.1	83575.8	144193
2	0	0	0	0	0	0	0	0	285.859	2127.38	4249.82	4452.2	4664.19	4886.32	5118.99	5362.75	5618.11	5885.64	6124.47	6913.6	7706.88	8359.04	9309.37	10144.8	11344	12470.8	5896.23	7474.9	10350.9	13458.5	17101.6	20985.7	25477.9	30728.4	37099	45064.3	55286.5	78484	105718	144199	203368	291452	400798	572473	650998	983526	1229700	1412600	1618665
3	0	0	0	0	0	279.674	903.552	2455.89	15356.5	19621.6	25057.7	26971.2	29030.7	31247.5	33633.5	36202	38966.5	41942.3	45145.2	53074.3	61307.9	70897.2	80852	91182.7	101900	113017	4612.83	18827.2	20785.1	22817.9	24928	27117.9	29389.5	31745.5	34188.2	36720.3	39344.3	42062.8	44300.6	46638.5	49079.5	51626.1	54282	57050	59933.1	62913.3	78143.6	94986.4	108007
4	0	0	0	0	0	364.62	1254.04	4329.54	4682.86	5044.28	5324.01	5819.88	6352.56	6943.22	7600.23	8333.41	9155.09	10080.1	11111.1	13412.4	15797.1	17360.9	19147.9	21223.7	23681.4	26658.7	10851.6	8214.65	8390.05	8605.2	8867.47	9185.85	9571.49	10038.3	10603.7	11358.8	12240.4	13276.3	14467.6	15775.8	18491.9	20371.6	22851.4	24964.3	27279	29891	32806.7	34801.5	40163.9
5	0	0	0	0	0	0	84.5923	169.186	338.37	676.739	1353.48	1446.37	1545.64	1651.73	1765.1	1886.24	2015.69	2154.03	2301.9	2342.69	2384.04	2641.11	2898.18	3155.27	3412.34	3936.43	1044.8	1365.6	1483.16	1612.1	1752.5	1906.96	2078.67	2267.88	2478.6	2714.72	2980.88	3283.16	4064.22	4991.13	6338.24	7694.13	9060.28	10438.7	11833.3	13164.2	16352.8	19814.7	24162.2
6	0	0	0	0	277.573	2536.29	8753.74	30863.1	34109.8	37261.9	39720.3	41550.1	43449.2	45399.5	47398.7	49440.4	51516.8	53598.2	55708.1	59947.1	63787	67726.5	71083.5	73800.8	75723.5	108820	73424.1	62887.9	66192.8	69628	73200	76917.8	80789.9	84826.3	89036.9	93435.3	98035.8	102855	93713.2	87541.9	96030.9	103628	112005	119426	122870	133864	150066	159151	208322
7	0	0	0	77.1177	1303.52	6201.51	34174.3	44995.8	39105.8	48814.7	63655.2	64967.4	66145.5	61138.9	56322.5	51624.9	47498.2	47485.2	49195.7	51985.1	54283.3	48227.3	44340.4	44451	39278.6	37703.9	49722.3	39421.4	39829.9	40893.2	41955	43015.5	44076.4	45138.1	46202.1	47270	48343.3	49424.6	50365.1	51867.7	58125.1	64360.1	70580.3	76795	83018.7	89270	95995.6	103570	109379
8	0	0	0	0	0	366.364	1551.68	6569.73	9407.02	13502.6	19451.3	22834.2	26951.5	31998.3	38224.3	45933.7	55582.2	67706.1	83027.1	95159.4	107834	119157	131198	148021	166672	186098	218526	257450	258926	259961	261170	262560	264140	265915	267897	270109	272560	275281	278308	281787	285640	289936	294759	300216	306951	314719	323882	335234	350383
9	0	0	0	0	0	229.737	1058.65	4924.81	7928.49	12907.8	21089.9	22544.3	24215.7	26155.6	28428.1	31117.3	34333.3	38206.7	42980.8	46442.4	49906.2	53140.3	56368.4	61122.5	65877.9	70969.2	77488.4	83997.1	85042.9	85913.4	86823	87776.4	88776.9	89831.5	90946.3	92130.1	93398.3	94753.2	99341.1	100864	108187	115564	123094	130974	139084	147526	156439	166050	175296
10	0	0	0	0	0	0	0	0	0	0	0	0	0	0	0	0	0	0	0	0	0	0	0	0	0	0.106063	1090.89	3116.59	6154.58	6026.09	5897.47	5768.84	5640.17	5511.44	5382.68	5253.87	5124.99	4996.08	4488.38	3980.61	3472.79	2964.93	3404.56	4297.96	6124.51	14548.7	18216	26465.9	36218.3
11	0	0	0	94.1097	1919.29	2986.19	6745.54	18753.6	45335.4	99691	267669	283517	281786	258688	232854	189314	152336	167865	192605	228423	260252	332775	461172	592562	381671	479976	564446	604696	620869	632572	644710	656792	691058	700760	709800	719624	727605	740903	750226	778333	797228	832449	873459	878348	900824	917025	929011	961478	973718
12	0	0	0	7.31452	36.5726	687.303	3431.72	13889.8	27009	43929.5	65578	68597.7	70128.7	67091.2	64622.7	62093.2	59615.6	62553.2	65263.3	71387.7	77022	84340.4	112662	130502	109459	131705	149237	155549	166839	174679	182804	191234	199990	209094	218569	228431	238711	249430	260598	272300	293292	313385	333449	360973	387132	422495	456526	480391	508951
13	0	0	0	867.497	2602.49	16482.4	27007.5	36756.7	70617.6	100560	124490	133575	142415	130963	119655	108499	97485.1	105793	113728	123588	132929	95552.1	110307	124035	97379.1	101639	124994	126313	126975	127968	128940	129889	130811	131702	132558	133375	134145	134864	135333	135734	139214	142237	145222	148142	150967	151756	152077	152093	151191
14	0	0	0	0	0	285.152	1593.93	4224.92	4683.3	5117.83	5451.67	5983.64	6527.32	7084.7	7657.71	7947.05	8270.2	8918.41	9592.91	10296.6	11002.1	16528.7	24822.3	24835.9	24824.9	33032.7	41103.7	54319.4	59721.3	65492.9	71834.8	78804.5	86465.1	91684.4	97206.8	103048	109223	115748	122611	131086	140340	151580	159637	177871	196320	223951	255730	300200	356386
15	0	0	0	0	77.3079	404.906	1424.07	4968.69	5657.4	6389.56	6689.98	7017.61	7478.93	7969.19	8490.2	9043.73	9631.83	10256.2	10904.2	11286	11660.1	12405.2	13221.5	14020	14823.3	15735.1	17820.6	19729.9	20890.4	21979.7	23191.6	24544.2	26059.8	27765.2	29693	31883.5	34386.2	37262.3	38954.7	41188.9	44080.8	47773.7	52445.5	58318.4	65667.2	74835.8	86253.7	100452	116957
16	0	0	0	0	74.1944	1258.16	2133.03	4816.57	5367.84	17193.4	19427.7	21566.4	23715.6	25872.1	28036.5	28300.2	28570	30752.5	32938	35033.3	37099.3	55345.7	80999.3	85897.9	82408.9	105004	129570	145942	157659	175582	193553	211591	230259	248611	267071	285679	304490	323504	341600	362502	385689	453663	489961	560438	606226	695841	797897	894520	1109938
17	0	0	99.7536	437.971	2670.28	13720.2	73484.4	84557.8	71297.3	77696.4	89544.4	100733	115383	134295	119366	107199	97564.5	91171.2	86149.8	96085.6	78974.6	78337.4	76683.1	59993.8	56172.5	58196.9	69067.1	65019	66279	66967.6	67667.7	68379.9	69104.4	69840.9	70589.7	71351.2	72125.1	72912	98628.9	99028	102258	105296	108318	111319	115059	128280	141279	149077	147275
18	0	0	0	14407.4	25813.7	46250.7	82436.9	147704	264641	474157	849534	810927	772313	734026	696311	659392	623426	588550	554869	522448	491331	461555	433132	406063	380335	355929	332824	369802	397222	426746	458536	492759	529600	569261	611942	657880	707318	760524	807247	858325	914081	974861	1041057	1045882	1050926	1056800	1062752	1068691	1064840
19	0	0	0	0	0	70.9513	266.068	997.754	1157.55	1314.19	1434.08	1852.22	2399.68	3131.36	4086.65	5333.13	6958.06	9072.67	11819.8	12910.8	13888.4	16079.1	20594.1	14755.6	16326.5	17518.5	20258.4	22870.7	24764.9	25951.5	27191.7	28485.5	29832.6	31232.5	32683.6	34183.6	35729.4	37316.3	38695.8	40102.3	39411.6	38217.5	36972.2	35882.5	34709.1	33287.6	31830.5	30241.3	28113.7
20	0	0	6.93714	308.218	1255.58	4696.83	13143.2	29348.5	60622.1	119719	234410	211505	180373	90770.3	128993	164821	228642	192750	153330	189278	180420	461229	540277	429298	389660	507422	555216	581599	605971	633140	644550	649160	658997	664716	672119	689117	709783	729098	756108	774650	779855	777902	775899	772218	764203	761475	778407	796376	809509
21	0	0	0	0	0	116.765	543.473	2241.23	2545.1	4828.14	8164.17	8865.24	9582.84	10321.2	11085.3	11882.4	12722.3	13620.3	14598.2	15373.3	16123.5	19775.3	23435.5	24841.5	28657.3	32436.6	38075.1	44272.9	45725.9	47256	48789.5	50325.9	51866.5	53411	54960.4	56515.2	58075.8	59643.9	62004.2	64370.1	68935.2	74223.8	79919.7	89946.3	99903.6	114679	139237	163853	195392
22	0	0	0	20.3317	88.5399	162.62	633.55	2715.15	4184.47	6050.23	8231	8750.82	9340.94	9992.87	10714.6	11515.1	12404.3	13393.7	14495.9	15724.8	17096.1	19251.2	21722.8	24553.1	31184.4	37415.7	41114.4	45558	46610.3	47692.4	48804.7	49947.9	51122.7	54134.4	57252.4	60480	63819.7	67274.7	66630.8	65847	64903.9	63815.3	62594.7	74757.1	85479.2	94902.4	103121	122702	138321
23	0	0	0	0	0	0	44.3971	199.787	278.564	380.464	500.698	726.086	999.111	1541.69	2062.17	3030.62	3953.72	5572.34	6810.64	8491.18	8491.18	8774.22	7092.6	7771.17	9457.65	11862.5	15393.2	22365.3	24021.3	23494.8	22963.7	22427.6	21886.5	21161.2	20434	19704.9	18973.4	18239.4	16654.3	15045	13410.5	11749.5	10060.7	8637.33	7173.85	6654.96	6659.9	7616.96	10708.6
24	0	0	0	0	0	0	0	6.67437	12.3844	63.9565	82.6415	89.6227	97.294	105.579	114.431	124.114	134.467	145.653	157.758	170.896	185.214	200.936	219.201	246.457	279.802	321.245	373.226	438.115	461.539	486.839	514.3	544.271	577.178	613.536	653.976	699.267	821.88	956.011	1053.87	1148.82	1317.4	1697.37	2972.97	6030.7	10739.3	21257.6	26388.6	41990.2	63256.6
25	0	0	0	1817.35	2750.68	4700.56	8618.32	23739	33181.8	45476.1	71507.9	74289.5	76890.3	76946.8	76887.1	76736	76514	77418.7	78122.7	80331.8	82272.4	82986.2	83647.5	73625	78933.2	81233.5	101054	115032	118559	122117	125896	129906	134156	138652	143399	148401	153659	159171	162291	168276	170674	181059	181565	180071	178664	180848	178441	182274	188494
26	0	0	0	0	0	42.8662	180.851	770.108	1115.65	1630.86	2404.82	2869.47	3434.82	4125.51	4972.84	6016.76	7308.54	8913.91	10918	13456.4	15981.4	20950	25925	30906.3	36410.2	34383.3	38961.1	43532.3	36555.2	37162.7	37796.5	38460.1	39157.1	39890.6	40666.6	41489.9	42367	43307.1	48594.8	49874.3	51273.5	53465.3	55916.8	58676.9	61313.5	64332.1	67855.3	72077.6	77456.9
27	0	0	0	0	0	0	0	0	0	0	0	0	0	0	0	0	0	0	0	0	0	0	0	0	0	0	0	0	0	0	0	0	0	0	0	0	0	0	0	0	0	0	0	0	0	0	0	0	0
Total	0	0	106.691	18037.3	38869.7	101844	269468	469998	708921	1.14415e+06	1.93502e+06	1.93145e+06	1.90522e+06	1.77234e+06	1.7344e+06	1.68115e+06	1.67022e+06	1.65381e+06	1.6519e+06	1.76356e+06	1.79773e+06	2.15359e+06	2.45111e+06	2.49701e+06	2.22587e+06	2.56348e+06	2.68216e+06	2.9e+06	3.01655e+06	3.13855e+06	3.24988e+06	3.35907e+06	3.50164e+06	3.61951e+06	3.74471e+06	3.88812e+06	4.04153e+06	4.21891e+06	4.4079e+06	4.60355e+06	4.84586e+06	5.18647e+06	5.5219e+06	5.89936e+06	6.17225e+06	6.79847e+06	7.39113e+06	7.96028e+06	8.7553e+06
check	0	0	106.691	18037.3	38869.7	101844	269468	469998	708921	1.14415e+06	1.93502e+06	1.93146e+06	1.90524e+06	1.77237e+06	1.73443e+06	1.68119e+06	1.67028e+06	1.65389e+06	1.652e+06	1.76368e+06	1.79785e+06	2.15372e+06	2.45122e+06	2.49711e+06	2.22601e+06	2.56365e+06	2.68237e+06	2.90031e+06	3.01684e+06	3.13887e+06	3.25025e+06	3.35946e+06	3.50207e+06	3.61996e+06	3.74517e+06	3.8886e+06	4.04201e+06	4.2194e+06	4.40849e+06	4.6043e+06	4.84661e+06	5.18697e+06	5.52243e+06	5.90007e+06	6.17314e+06	6.79937e+06	7.39214e+06	7.96153e+06	8.75763e+06
	#DIV/0!	#DIV/0!	-5.71746e-08	2.57018e-07	1.265e-07	3.01894e-07	-5.01433e-08	-8.00854e-09	1.50312e-07	-1.99493e-07	2.6836e-07	5.30477e-06	8.10534e-06	1.26006e-05	1.78302e-05	2.59225e-05	3.44513e-05	4.85103e-05	5.98658e-05	6.77359e-05	6.67723e-05	5.58326e-05	4.58669e-05	4.26118e-05	5.96608e-05	6.38316e-05	7.8792e-05	0.00010774	9.82199e-05	0.000103327	0.00011269	0.000117822	0.000122806	0.000121958	0.000123142	0.000123384	0.000120608	0.000116677	0.000132506	0.000163151	0.000155178	9.67832e-05	9.67608e-05	0.000120785	0.00014424	0.000133279	0.000136044	0.000157082	0.000266777
Percentage rainfed cropland of total land area
region	-10000	-9000	-8000	-7000	-6000	-5000	-4000	-3000	-2000	-1000	0	100	200	300	400	500	600	700	800	900	1000	1100	1200	1300	1400	1500	1600	1700	1710	1720	1730	1740	1750	1760	1770	1780	1790	1800	1810	1820	1830	1840	1850	1860	1870	1880	1890	1900	1910
1	0	0	0	0	0	0	0	0	0	0	0	0	0	0	0	0	0	0	0	0	0	0	0	0	0	0	0	2.29908e-05	2.97734e-05	3.85968e-05	5.00859e-05	6.50605e-05	8.45964e-05	0.000110107	0.000143449	0.000246997	0.000334067	0.000487078	0.000662279	0.000907381	0.00125134	0.00173816	0.00242407	0.00394842	0.00547818	0.00679776	0.00852928	0.00937159	0.0161688
2	0	0	0	0	0	0	0	0	3.14864e-05	0.000234324	0.000468104	0.000490396	0.000513745	0.000538212	0.00056384	0.00059069	0.000618817	0.000648284	0.00067459	0.00076151	0.000848887	0.000920721	0.0010254	0.00111742	0.0012495	0.00137361	0.000649451	0.000823336	0.00114011	0.00148241	0.00188368	0.00231151	0.00280631	0.00338463	0.00408633	0.00496368	0.00608962	0.00864476	0.0116445	0.0158831	0.0224003	0.0321025	0.0441466	0.063056	0.0717053	0.108332	0.135447	0.155593	0.178291
3	0	0	0	0	0	0.000143932	0.000465008	0.00126391	0.00790314	0.0100981	0.0128958	0.0138806	0.0149405	0.0160813	0.0173093	0.0186311	0.0200539	0.0215854	0.0232337	0.0273144	0.0315518	0.0364868	0.04161	0.0469266	0.0524423	0.0581633	0.00237397	0.00968929	0.0106969	0.0117431	0.0128291	0.0139561	0.0151251	0.0163376	0.0175948	0.0188979	0.0202483	0.0216474	0.022799	0.0240023	0.0252585	0.0265691	0.0279359	0.0293604	0.0308442	0.032378	0.0402161	0.0488842	0.0555853
4	0	0	0	0	0	0.000496004	0.00170591	0.0058896	0.00637024	0.0068619	0.00724241	0.00791696	0.00864158	0.00944507	0.0103388	0.0113362	0.0124539	0.0137122	0.0151148	0.0182453	0.0214893	0.0236166	0.0260475	0.0288713	0.0322145	0.0362647	0.0147617	0.0111746	0.0114132	0.0117059	0.0120627	0.0124958	0.0130204	0.0136554	0.0144245	0.0154517	0.016651	0.0180601	0.0196807	0.0214604	0.0251552	0.0277121	0.0310854	0.0339598	0.0371084	0.0406616	0.044628	0.0473416	0.0546362
5	0	0	0	0	0	0	1.00194e-05	2.00389e-05	4.00776e-05	8.01551e-05	0.000160311	0.000171312	0.000183071	0.000195636	0.000209064	0.000223413	0.000238745	0.000255131	0.000272644	0.000277476	0.000282373	0.000312822	0.00034327	0.000373721	0.000404169	0.000466243	0.000123749	0.000161745	0.00017567	0.000190942	0.000207571	0.000225867	0.000246204	0.000268615	0.000293573	0.00032154	0.000353065	0.000388868	0.000481379	0.000591165	0.000750721	0.000911317	0.00107313	0.00123639	0.00140157	0.00155921	0.00193688	0.00234691	0.00286185
6	0	0	0	0	3.02216e-05	0.000276146	0.000953092	0.00336032	0.00371381	0.00405701	0.00432467	0.0045239	0.00473067	0.00494302	0.00516069	0.00538299	0.00560906	0.00583568	0.0060654	0.00652694	0.00694502	0.00737394	0.00773945	0.0080353	0.00824465	0.0118481	0.00799429	0.00684712	0.00720696	0.00758098	0.00796989	0.00837468	0.00879627	0.00923574	0.00969419	0.0101731	0.010674	0.0111986	0.0102033	0.00953141	0.0104557	0.0112828	0.0121949	0.0130029	0.0133779	0.0145749	0.0163389	0.0173281	0.0226817
7	0	0	0	1.28222e-05	0.000216733	0.00103111	0.0056821	0.00748135	0.00650205	0.00811633	0.0105838	0.010802	0.0109979	0.0101654	0.00936463	0.00858358	0.00789743	0.00789527	0.00817966	0.00864346	0.00902558	0.00801865	0.00737239	0.00739078	0.00653078	0.00626895	0.00826723	0.00655452	0.00662244	0.00679923	0.00697577	0.0071521	0.00732849	0.00750503	0.00768193	0.00785948	0.00803794	0.00821773	0.0083741	0.00862394	0.00966435	0.010701	0.0117352	0.0127686	0.0138034	0.0148427	0.015961	0.0172204	0.0181862
8	0	0	0	0	0	3.22779e-05	0.000136709	0.000578816	0.000828791	0.00118963	0.00171373	0.00201177	0.00237452	0.00281916	0.00336769	0.00404692	0.00489698	0.00596514	0.00731497	0.00838387	0.00950058	0.0104981	0.011559	0.0130411	0.0146843	0.0163958	0.0192529	0.0226823	0.0228123	0.0229034	0.02301	0.0231324	0.0232716	0.023428	0.0236027	0.0237975	0.0240134	0.0242532	0.0245199	0.0248264	0.0251659	0.0255444	0.0259693	0.0264501	0.0270434	0.0277278	0.0285352	0.0295353	0.0308699
9	0	0	0	0	0	3.92752e-05	0.000180984	0.000841934	0.00135544	0.00220669	0.00360547	0.00385411	0.00413985	0.0044715	0.00486	0.00531973	0.00586953	0.00653173	0.00734788	0.00793967	0.00853184	0.00908473	0.0096366	0.0104494	0.0112623	0.0121327	0.0132472	0.0143599	0.0145387	0.0146875	0.014843	0.015006	0.0151771	0.0153574	0.0155479	0.0157503	0.0159671	0.0161988	0.0169831	0.0172434	0.0184954	0.0197566	0.0210438	0.022391	0.0237775	0.0252208	0.0267444	0.0283874	0.0299681
10	0	0	0	0	0	0	0	0	0	0	0	0	0	0	0	0	0	0	0	0	0	0	0	0	0	8.70019e-08	0.000894837	0.00255649	0.0050485	0.00494311	0.0048376	0.00473208	0.00462654	0.00452094	0.00441533	0.00430967	0.00420395	0.00409821	0.00368174	0.00326523	0.00284868	0.00243209	0.00279271	0.00352555	0.00502384	0.0119341	0.0149423	0.0217095	0.0297093
11	0	0	0	2.59603e-05	0.00052944	0.000823746	0.00186077	0.00517322	0.0125058	0.0274999	0.073837	0.0782087	0.0777311	0.0713595	0.0642332	0.0522226	0.0420222	0.046306	0.0531305	0.063011	0.0717909	0.0917966	0.127215	0.163459	0.105285	0.132402	0.155703	0.166806	0.171268	0.174496	0.177844	0.181177	0.190629	0.193306	0.1958	0.198509	0.200711	0.204379	0.206951	0.214704	0.219917	0.229633	0.240945	0.242294	0.248494	0.252963	0.256269	0.265225	0.268602
12	0	0	0	5.46845e-06	2.73423e-05	0.000513839	0.00256561	0.0103843	0.0201924	0.0328424	0.0490272	0.0512848	0.0524294	0.0501585	0.048313	0.0464219	0.0445696	0.0467658	0.0487919	0.0533706	0.0575829	0.0630543	0.0842283	0.0975651	0.0818331	0.0984648	0.111572	0.116291	0.124732	0.130593	0.136667	0.14297	0.149516	0.156322	0.163406	0.170779	0.178464	0.186478	0.194827	0.203576	0.21927	0.234292	0.249292	0.269869	0.289427	0.315864	0.341306	0.359148	0.3805
13	0	0	0	0.00111853	0.00335559	0.021252	0.0348228	0.0473932	0.0910527	0.129659	0.160514	0.172229	0.183627	0.16886	0.15428	0.139896	0.125695	0.136407	0.146638	0.159352	0.171396	0.123203	0.142227	0.159928	0.125558	0.131051	0.161164	0.162865	0.163718	0.164998	0.166252	0.167475	0.168664	0.169813	0.170918	0.17197	0.172964	0.17389	0.174495	0.175013	0.179499	0.183397	0.187245	0.191011	0.194654	0.19567	0.196084	0.196105	0.194942
14	0	0	0	0	0	0.000345802	0.00193296	0.00512353	0.00567941	0.00620637	0.00661121	0.00725632	0.00791565	0.00859158	0.00928647	0.00963735	0.0100292	0.0108153	0.0116333	0.0124866	0.0133422	0.0200442	0.0301019	0.0301184	0.030105	0.0400586	0.0498462	0.0658728	0.0724237	0.0794229	0.0871137	0.0955657	0.104856	0.111185	0.117882	0.124966	0.132455	0.140366	0.14869	0.158967	0.170189	0.183821	0.193591	0.215703	0.238077	0.271584	0.310122	0.364051	0.432188
15	0	0	0	0	1.98803e-05	0.000104124	0.00036621	0.00127773	0.00145484	0.00164312	0.00172037	0.00180463	0.00192326	0.00204933	0.00218332	0.00232566	0.00247689	0.00263745	0.0028041	0.00290227	0.00299847	0.00319008	0.00340001	0.00360534	0.00381192	0.00404639	0.0045827	0.00507368	0.00537212	0.00565224	0.00596388	0.00631173	0.00670147	0.00714001	0.00763577	0.00819906	0.00884265	0.00958225	0.0100175	0.010592	0.0113357	0.0122853	0.0134867	0.014997	0.0168868	0.0192446	0.0221807	0.025832	0.0300764
16	0	0	0	0	4.49185e-06	7.61714e-05	0.000129137	0.000291603	0.000324978	0.00104092	0.00117619	0.00130567	0.00143578	0.00156634	0.00169738	0.00171334	0.00172967	0.00186181	0.00199412	0.00212098	0.00224605	0.00335072	0.00490383	0.0052004	0.00498917	0.00635709	0.00784435	0.00883558	0.00954494	0.01063	0.011718	0.0128101	0.0139403	0.0150513	0.0161689	0.0172955	0.0184343	0.0195855	0.020681	0.0219465	0.0233502	0.0274655	0.0296631	0.0339298	0.0367019	0.0421274	0.048306	0.0541558	0.0671975
17	0	0	1.92834e-05	8.46644e-05	0.000516192	0.00265227	0.0142053	0.0163459	0.0137825	0.0150195	0.0173099	0.0194727	0.0223048	0.0259606	0.0230747	0.0207227	0.0188602	0.0176243	0.0166536	0.0185743	0.0152666	0.0151434	0.0148236	0.0115974	0.0108587	0.0112501	0.0133514	0.0125688	0.0128124	0.0129455	0.0130809	0.0132185	0.0133586	0.013501	0.0136457	0.0137929	0.0139425	0.0140946	0.019066	0.0191431	0.0197676	0.0203549	0.020939	0.021519	0.022242	0.0247979	0.0273106	0.0288181	0.0284697
18	0	0	0	0.00455332	0.00815818	0.0146171	0.0260535	0.0466805	0.0836374	0.149853	0.268488	0.256286	0.244083	0.231982	0.220063	0.208395	0.197028	0.186006	0.175361	0.165115	0.155281	0.14587	0.136887	0.128333	0.120202	0.112488	0.105186	0.116873	0.125539	0.134869	0.144916	0.155732	0.167375	0.17991	0.193399	0.207917	0.223542	0.240357	0.255123	0.271266	0.288887	0.308096	0.329017	0.330542	0.332136	0.333992	0.335873	0.33775	0.336533
19	0	0	0	0	0	0.000300094	0.00112536	0.00422008	0.00489597	0.00555847	0.00606556	0.00783411	0.0101496	0.0132444	0.0172848	0.0225569	0.0294297	0.0383736	0.0499929	0.0546071	0.0587422	0.0680079	0.0871043	0.0624102	0.0690543	0.0740961	0.0856845	0.0967335	0.104745	0.109764	0.11501	0.120482	0.12618	0.1321	0.138238	0.144582	0.15112	0.157833	0.163667	0.169616	0.166694	0.161644	0.156377	0.151768	0.146805	0.140793	0.134629	0.127908	0.118909
20	0	0	6.37241e-07	2.83127e-05	0.000115337	0.000431447	0.00120732	0.00269594	0.0055687	0.0109973	0.0215328	0.0194287	0.0165689	0.00833809	0.0118492	0.0151404	0.0210028	0.0177059	0.0140848	0.0173869	0.0165732	0.0423682	0.0496295	0.039435	0.0357939	0.0466115	0.0510017	0.0534253	0.0556641	0.0581598	0.0592079	0.0596314	0.060535	0.0610603	0.0617404	0.0633018	0.0652002	0.0669744	0.0694555	0.0711588	0.071637	0.0714575	0.0712735	0.0709354	0.0701991	0.0699486	0.0715039	0.0731545	0.0743609
21	0	0	0	0	0	4.53129e-05	0.000210905	0.000869753	0.000987678	0.00187366	0.00316827	0.00344033	0.00371881	0.00400535	0.00430188	0.00461118	0.00493714	0.00528561	0.00566513	0.0059659	0.00625706	0.00767421	0.00909461	0.00964025	0.011121	0.0125877	0.0147758	0.017181	0.0177448	0.0183386	0.0189337	0.01953	0.0201278	0.0207272	0.0213285	0.0219318	0.0225375	0.023146	0.024062	0.0249801	0.0267517	0.028804	0.0310144	0.0349055	0.0387696	0.0445033	0.0540337	0.0635865	0.0758256
22	0	0	0	8.41688e-06	3.66536e-05	6.73211e-05	0.000262276	0.00112401	0.00173228	0.00250467	0.00340746	0.00362265	0.00386695	0.00413683	0.00443562	0.00476699	0.00513513	0.0055447	0.00600097	0.00650973	0.00707743	0.0079696	0.00899277	0.0101644	0.0129097	0.0154893	0.0170205	0.01886	0.0192957	0.0197436	0.0202041	0.0206773	0.0211637	0.0224105	0.0237013	0.0250374	0.02642	0.0278503	0.0275837	0.0272592	0.0268688	0.0264181	0.0259129	0.0309478	0.0353866	0.0392876	0.0426899	0.050796	0.057262
23	0	0	0	0	0	0	0.000105378	0.000474201	0.000661181	0.000903043	0.00118842	0.00172339	0.00237142	0.00365925	0.00489462	0.00719328	0.00938428	0.0132261	0.0161653	0.0201541	0.0201541	0.0208259	0.0168345	0.0184451	0.022448	0.0281561	0.0365363	0.0530847	0.0570154	0.0557658	0.054505	0.0532327	0.0519484	0.0502268	0.0485008	0.0467701	0.0450339	0.0432919	0.0395296	0.0357099	0.0318303	0.0278879	0.0238794	0.020501	0.0170274	0.0157958	0.0158075	0.0180791	0.0254172
24	0	0	0	0	0	0	0	8.30714e-07	1.54141e-06	7.96025e-06	1.02858e-05	1.11547e-05	1.21095e-05	1.31407e-05	1.42425e-05	1.54476e-05	1.67362e-05	1.81285e-05	1.96351e-05	2.12703e-05	2.30523e-05	2.50092e-05	2.72825e-05	3.06748e-05	3.48251e-05	3.99832e-05	4.6453e-05	5.45293e-05	5.74448e-05	6.05936e-05	6.40115e-05	6.77418e-05	7.18375e-05	7.63627e-05	8.13961e-05	8.70332e-05	0.000102294	0.000118988	0.000131168	0.000142986	0.000163968	0.00021126	0.000370027	0.000750602	0.00133665	0.00264579	0.00328442	0.00522625	0.00787313
25	0	0	0	0.000985863	0.00149217	0.00254993	0.00467521	0.0128778	0.0180003	0.0246696	0.0387912	0.0403001	0.041711	0.0417416	0.0417092	0.0416273	0.0415068	0.0419976	0.0423795	0.0435779	0.0446306	0.0450178	0.0453766	0.0399396	0.0428192	0.0440671	0.0548193	0.062402	0.0643153	0.0662453	0.0682954	0.0704708	0.0727762	0.075215	0.0777902	0.0805036	0.0833559	0.0863463	0.0880385	0.0912853	0.092586	0.0982198	0.0984942	0.0976838	0.0969204	0.0981055	0.0967994	0.0988788	0.102253
26	0	0	0	0	0	7.65432e-06	3.22933e-05	0.000137513	0.000199214	0.000291211	0.000429412	0.00051238	0.000613332	0.000736663	0.000887965	0.00107437	0.00130503	0.00159169	0.00194955	0.00240281	0.00285369	0.00374089	0.00462924	0.00551872	0.00650152	0.00613959	0.006957	0.00777325	0.00652741	0.00663588	0.00674906	0.00686755	0.00699201	0.00712298	0.00726154	0.00740857	0.00756518	0.00773305	0.00867722	0.00890571	0.00915555	0.00954693	0.00998466	0.0104775	0.0109483	0.0114873	0.0121164	0.0128704	0.0138309
27	0	0	0	0	0	0	0	0	0	0	0	0	0	0	0	0	0	0	0	0	0	0	0	0	0	0	0	0	0	0	0	0	0	0	0	0	0	0	0	0	0	0	0	0	0	0	0	0	0
Total	0	0	8.18373e-07	0.000138355	0.00029815	0.000781194	0.00206695	0.00360513	0.00543779	0.00877624	0.0148426	0.0148152	0.014614	0.0135948	0.0133037	0.0128953	0.0128115	0.0126855	0.0126709	0.0135274	0.0137895	0.0165192	0.0188013	0.0191533	0.0170736	0.0196632	0.0205736	0.0222445	0.0231384	0.0240743	0.0249283	0.0257658	0.0268593	0.0277635	0.0287239	0.0298239	0.0310006	0.0323612	0.0338109	0.0353116	0.0371702	0.0397829	0.0423558	0.0452511	0.0473443	0.0521477	0.0566938	0.0610594	0.0671576
Total rainfed cropland area per capita (ha/cap)
region	-10000	-9000	-8000	-7000	-6000	-5000	-4000	-3000	-2000	-1000	0	100	200	300	400	500	600	700	800	900	1000	1100	1200	1300	1400	1500	1600	1700	1710	1720	1730	1740	1750	1760	1770	1780	1790	1800	1810	1820	1830	1840	1850	1860	1870	1880	1890	1900	1910
1	0	0	0	0	0	0.956811	2.78201	6.80518	38.2943	44.0307	50.5939	49.9088	49.2289	48.5532	47.8796	47.206	46.5288	45.8439	45.1451	53.0742	61.3078	59.0811	57.7513	56.9893	56.6112	56.5082	2.30641	9.41357	9.14495	8.63368	8.08799	7.52393	6.95491	6.39204	5.84416	5.31796	4.81832	4.34858	3.8603	3.39158	2.97182	2.59711	2.26383	1.6791	1.53973	1.38674	1.53241	1.72369	1.49199
2	0	0	0	0	0	0.0920225	0.284848	0.885079	0.861565	0.835264	0.793428	0.827907	0.8626	0.899944	0.940326	0.984161	1.03204	1.08463	1.14115	1.22433	1.2976	1.32377	1.31797	1.35038	1.36162	1.41274	1.3939	0.886073	0.611158	0.4732	0.391632	0.338968	0.303311	0.27873	0.262004	0.252822	0.24785	0.210283	0.176965	0.148853	0.133629	0.113085	0.096053	0.0782876	0.0700152	0.0590957	0.0519693	0.0456629	0.043846
3	0	0	0	0	0	0	0.00275368	0.00440593	0.00704943	0.0112791	0.0180466	0.0182817	0.0185201	0.0187614	0.019006	0.0192538	0.0195046	0.0197588	0.0200165	0.0176807	0.0158936	0.015536	0.0152536	0.0150251	0.0148363	0.0157457	0.10448	0.0341399	0.0342081	0.0345102	0.0350007	0.0356927	0.0366064	0.0377095	0.0390345	0.0406065	0.0424557	0.0446274	0.0528336	0.06217	0.0757808	0.0884432	0.100277	0.111394	0.12191	0.131088	0.138008	0.145533	0.159382
4	0	0	0	0	0.141848	1.14114	3.44261	10.5079	9.92712	9.1169	7.99596	7.5473	7.1078	6.67435	6.24709	5.82586	5.4106	4.99944	4.59594	3.99685	3.51084	3.28354	3.00998	2.69638	2.34576	2.78695	4.00503	3.83504	3.87068	3.88453	3.87483	3.84024	3.7799	3.69346	3.58112	3.42682	3.25837	3.07759	2.49765	2.10365	1.99459	1.91543	1.82944	1.7696	1.63702	1.60052	1.60788	1.52192	1.67294
5	0	0	0	0.00821841	0.105839	0.383647	1.61077	1.61587	1.06999	1.01764	1.01106	0.963099	0.915195	0.789531	0.678837	0.580743	0.498696	0.465324	0.449944	0.466912	0.478832	0.383749	0.321351	0.295771	0.241571	0.201217	5.60089	7.15111	6.28073	5.57652	4.92179	4.31789	3.76562	3.26481	2.8145	2.41292	2.05774	1.74604	1.38957	1.16524	1.02827	0.937928	0.873476	0.824897	0.786652	0.760372	0.658238	0.58612	0.491049
6	0	0	0	0	0	0.0242219	0.0867633	0.309886	0.373342	0.44288	0.52153	0.575005	0.637615	0.711071	0.797831	0.900318	1.02291	1.16962	1.34593	1.39559	1.44346	1.45338	1.47009	1.53284	1.6042	1.67305	3.97876	4.81207	4.75512	4.69078	4.63047	4.57413	4.5218	4.47325	4.42857	4.38788	4.35112	4.31856	4.28125	4.03734	3.4666	3.07839	2.68969	2.32957	2.14102	1.87893	1.55835	1.38695	1.21122
7	0	0	0	0	0	0.0456976	0.118949	0.243839	0.253278	0.279789	0.257189	0.259771	0.264292	0.29715	0.336506	0.390415	0.457812	0.478428	0.498038	0.485548	0.475299	0.559373	0.633347	0.630451	0.773198	0.855017	0.704417	0.903128	0.912203	0.914485	0.91709	0.92003	0.923333	0.927039	0.931203	0.935881	0.941203	0.947122	0.938312	0.899738	0.859202	0.826868	0.801138	0.83123	0.796752	0.765797	0.6859	0.642981	0.616035
8	0	0	0	0	0	0	0	0	0	0	0	0	0	0	0	0	0	0	0	0	0	0	0	0	0	3.40564e-07	0.0030081	0.00736237	0.0144795	0.0141424	0.0137961	0.0134414	0.0130791	0.0127099	0.0123339	0.0119521	0.0115646	0.0111719	0.00993566	0.00870903	0.00750053	0.00631287	0.00713469	0.00884832	0.0123334	0.0285741	0.0347587	0.0487813	0.0638394
9	0	0	0	0.0572544	0.806531	0.853933	1.29373	2.37927	3.7562	5.32947	9.13362	8.91803	8.11689	6.77444	5.49935	3.99611	2.84629	2.74601	2.72469	2.98702	3.16388	3.73465	4.80615	5.66924	3.37483	3.91808	4.21312	4.15736	4.20678	4.23431	4.262	4.28638	4.45044	4.45122	4.44457	4.43924	4.41788	4.42459	4.40298	4.48477	4.22222	4.07402	3.96753	3.69389	3.53919	3.37084	3.20306	3.10821	2.94763
10	0	0	0	1.00988	2.52633	23.748	59.302	120.031	116.713	94.9211	70.8519	66.7026	61.3721	52.8421	45.8078	39.6128	34.2288	32.3238	30.3515	30.1815	29.8497	27.2385	31.1875	31.6101	23.5671	25.521	24.7874	18.0856	19.7717	21.1068	22.5307	24.0512	25.6768	27.4173	29.283	31.285	33.4362	35.7507	38.2413	40.9334	45.1922	49.5268	44.7703	39.3126	31.7885	17.5311	15.4326	11.6431	9.19534
11	0	0	0	0.421904	0.875999	3.66081	3.15187	2.22021	1.69544	1.1562	0.491776	0.506765	0.521085	0.507848	0.493441	0.525616	0.577333	0.568597	0.551522	0.536122	0.51814	0.306527	0.260819	0.201304	0.239216	0.190333	0.178264	0.158907	0.149919	0.145062	0.140323	0.135954	0.131879	0.128016	0.124381	0.12049	0.116424	0.112923	0.10838	0.101251	0.0954922	0.0902	0.0872793	0.0841925	0.081064	0.0755874	0.0707865	0.0653985	0.0595557
12	0	0	0	0	0	0.0890062	0.302809	0.482818	0.276827	0.17808	0.107474	0.112978	0.118103	0.129203	0.140742	0.152839	0.166756	0.168414	0.1703	0.16362	0.158205	0.210221	0.222196	0.18985	0.217385	0.23564	0.236372	0.283451	0.29264	0.305172	0.318414	0.332385	0.347098	0.350303	0.353514	0.356693	0.359804	0.362804	0.365467	0.370827	0.364081	0.361913	0.353224	0.357935	0.361351	0.369655	0.382108	0.416425	0.454611
13	0	0	0	0	0.0386539	0.0639325	0.133507	0.331246	0.188579	0.14199	0.111499	0.107963	0.106842	0.122603	0.141503	0.164431	0.192637	0.186476	0.181737	0.170354	0.160829	0.23406	0.211545	0.194723	0.255574	0.251762	0.222758	0.232117	0.242931	0.251947	0.262041	0.273363	0.286096	0.300465	0.316737	0.335242	0.356393	0.380684	0.392288	0.408864	0.421638	0.441727	0.468761	0.503878	0.548462	0.611629	0.690847	0.788481	0.899668
14	0	0	0	0	0.0306742	0.445854	0.647897	1.254	1.19788	3.28874	3.18524	3.27441	3.34038	3.38591	3.41384	3.25426	3.10049	3.10946	3.1059	3.08323	3.061	3.04432	2.97027	3.1499	3.02196	2.88789	2.8508	2.40828	2.39168	2.50858	2.60412	2.68053	2.7463	2.79131	2.82236	2.84124	2.84965	2.84858	2.82971	2.795	2.7629	2.98943	3.05223	3.1024	3.0137	2.9994	2.98117	2.81655	2.90867
15	0	0	0.0258508	0.0972848	0.508408	2.23908	10.2791	10.1383	7.32724	6.84417	6.76101	7.0987	7.58909	8.24409	6.83913	5.73254	4.86952	4.24707	3.74561	4.03716	3.21031	3.02222	2.80474	2.02267	1.74445	1.66273	1.72663	1.44805	1.42438	1.39495	1.36501	1.33464	1.30389	1.27286	1.24163	1.21026	1.17881	1.14739	1.49329	1.4415	1.43009	1.41382	1.39546	1.37513	1.36205	1.38675	1.41318	1.32957	1.18275
16	0	0	0	2.887	4.43372	6.80905	10.4026	15.9756	24.5337	37.6751	57.8527	49.4941	42.6665	36.9992	32.2283	30.1036	27.9875	24.2328	20.9071	18.4156	16.2693	10.189	6.49382	5.70402	5.53787	4.0397	3.03952	2.96683	2.96725	2.86335	2.79123	2.74368	2.71582	2.7043	2.70646	2.72068	2.74544	2.77987	2.78684	2.77444	2.76135	2.5069	2.47083	2.17207	2.01333	1.76734	1.55329	1.39442	1.12651
17	0	0	0	0	0	0.00581579	0.0126901	0.0318606	0.0252086	0.0203589	0.0143694	0.0162413	0.0181738	0.0202491	0.0274765	0.0365512	0.0475855	0.0634538	0.0837947	0.0883561	0.106909	0.124571	0.157815	0.128963	0.15081	0.152465	0.148916	0.179338	0.190543	0.196959	0.20354	0.210269	0.217131	0.224103	0.231158	0.238267	0.245394	0.252489	0.257199	0.261663	0.246434	0.229435	0.213298	0.199097	0.184535	0.159611	0.139163	0.123663	0.107991
18	0	0	0.00210559	0.047468	0.0981145	0.186224	0.264411	0.299579	0.313976	0.314609	0.312556	0.268586	0.21864	0.105243	0.143329	0.175813	0.23451	0.190375	0.146032	0.174052	0.160377	0.396764	0.450238	0.346915	0.30562	0.386613	0.411272	0.352485	0.359275	0.367397	0.366225	0.361316	0.359457	0.355466	0.352513	0.354609	0.358479	0.36154	0.368239	0.377882	0.361049	0.366935	0.334442	0.316484	0.298518	0.296064	0.278373	0.279921	0.306576
19	0	0	0	0	0	0.177464	0.660794	2.18004	1.98049	3.00565	4.06593	3.32722	2.70688	2.19146	1.76696	1.42006	1.13856	0.911651	0.729912	0.683255	0.644941	0.659177	0.585887	0.82805	0.81878	0.810916	0.761502	0.708366	0.665598	0.64609	0.626495	0.606885	0.587348	0.56794	0.548723	0.529749	0.511061	0.492703	0.480787	0.468486	0.494929	0.531324	0.570407	0.636227	0.700391	0.80017	0.965243	1.12852	1.32325
20	0	0	0	0.00191418	0.00504752	0.00560342	0.0131756	0.0340394	0.0315942	0.0451948	0.0141013	0.0168841	0.0214299	0.0447361	0.0351035	0.0305047	0.0244924	0.0317581	0.0435276	0.0391363	0.0457495	0.021065	0.0207854	0.0303163	0.0432849	0.040638	0.0415866	0.0450925	0.0440622	0.0393189	0.0378574	0.0344689	0.0283494	0.0271862	0.0257559	0.0217614	0.0211988	0.0228491	0.0193447	0.0185312	0.016597	0.0154275	0.0144876	0.0175939	0.0236691	0.0259655	0.0273497	0.0305225	0.0325028
21	0	0	0	0	0	0	0.010475	0.034237	0.035391	0.0250786	0.0191727	0.02555	0.0324419	0.0463457	0.0575376	0.0786195	0.095446	0.12517	0.142168	0.167397	0.158583	0.134012	0.0916183	0.0932402	0.0987475	0.109641	0.120854	0.151069	0.156485	0.147544	0.139187	0.131357	0.123998	0.116088	0.108644	0.101628	0.0949998	0.0887269	0.0768264	0.0659881	0.0543017	0.0438811	0.0347399	0.026631	0.0199757	0.0162759	0.0145107	0.0149277	0.0184732
22	0	0	0	0	0	0	0	0.00238571	0.00123533	0.00361362	0.00317354	0.00319104	0.00322735	0.00327635	0.00333415	0.00340623	0.00348579	0.00357535	0.00367502	0.00378541	0.00390765	0.00385649	0.00385563	0.00399769	0.00367737	0.0035461	0.00377292	0.0039885	0.00416108	0.00434706	0.00454855	0.00476827	0.0050093	0.0051001	0.00521606	0.00536018	0.00606391	0.00679869	0.00713529	0.00741583	0.00812472	0.0100202	0.0168288	0.0272952	0.0405102	0.0687359	0.0746634	0.105607	0.13295
23	0	0	0	10.3504	10.444	11.8983	14.5434	26.7063	24.8864	22.7381	23.8359	14.8579	10.9844	6.99517	5.12581	3.4105	2.55047	1.72042	1.42042	1.25519	1.37121	1.33849	1.307	1.00856	0.848745	0.660433	0.594441	0.430832	0.408825	0.421093	0.434124	0.447953	0.462607	0.48143	0.501396	0.522537	0.544889	0.56847	0.56351	0.5685	0.561427	0.580318	0.567391	0.542816	0.520173	0.491343	0.445244	0.407095	0.374231
24	0	0	0	0	0	0.0171386	0.0722746	0.307487	0.444658	0.624689	0.907388	1.07609	1.2794	1.52517	1.82319	2.18564	2.62772	3.16834	3.83108	4.65383	5.43687	6.99409	8.04744	9.22943	10.5296	8.19072	7.82162	7.54886	6.39387	6.43267	6.46816	6.49998	6.52778	6.55072	6.5684	6.57978	6.57897	6.56373	7.41478	7.26555	6.8056	6.10566	4.66008	3.08075	2.38959	2.01979	1.59482	1.42187	1.30302
25	0	0	0	0	0	0	0	0	0	0	0	0	0	0	0	0	0	0	0	0	0	0	0	0	0	0	0	0	0	0	0	0	0	0	0	0	0	0	0	0	0	0	0	0	0	0	0	0	0
26	0	0	0	0	0	0	0	0	0	0	0	0	0	0	0	0	0	0	0	0	0	0	0	0	0	0	0	0	0	0	0	0	0	0	0	0	0	0	0	0	0	0	0	0	0	0	0	0	0
27	0	0	0	0	0	0	0	0	0	0	0	0	0	0	0	0	0	0	0	0	0	0	0	0	0	0	0	0	0	0	0	0	0	0	0	0	0	0	0	0	0	0	0	0	0	0	0	0	0
Total	0	0	0.00147304	0.188322	0.294427	0.533893	0.936476	1.05648	0.976667	1.03619	0.833618	0.815291	0.791831	0.778893	0.718075	0.663879	0.615252	0.594526	0.578198	0.567157	0.555907	0.541234	0.551142	0.547142	0.503068	0.50942	0.52008	0.490137	0.491979	0.488359	0.488938	0.483116	0.469639	0.464143	0.457365	0.436395	0.433875	0.447224	0.433612	0.437331	0.427089	0.434287	0.434635	0.444413	0.465228	0.483891	0.485451	0.484867	0.49619
in km2	-10000	-9000	-8000	-7000	-6000	-5000	-4000	-3000	-2000	-1000	0	100	200	300	400	500	600	700	800	900	1000	1100	1200	1300	1400	1500	1600	1700	1710	1720	1730	1740	1750	1760	1770	1780	1790	1800	1810	1820	1830	1840	1850	1860	1870	1880	1890	1900	1910
North America	0	0	0	0	0	0	0	0	285.859	2127.38	4249.82	4452.2	4664.19	4886.32	5118.99	5362.75	5618.11	5885.64	6124.47	6913.6	7706.88	8359.04	9309.37	10144.8	11344	12470.8	5896.23	7679.93	10616.4	13802.7	17548.3	21565.9	26232.3	31710.3	38378.3	47267	58265.7	82827.8	111625	152291	214527	306953	422416	607685	699853	1.04415e+06	1.30576e+06	1.49618e+06	1.76286e+06
Latin America	0	0	0	0	277.573	3180.58	10995.9	37817.7	54487.5	62604.5	71455.4	75787.5	80378	85241.9	90397.6	95862.1	101654	107775	114266	128777	143276	158626	173982	189362	204717	252431	89933.3	91295.3	96851.1	102663	108748	115129	121830	128878	136307	144229	152601	161477	156546	154947	169941	183320	198199	211879	221915	239833	277369	308754	380655
Europe	0	0	0	101.424	1955.86	3673.49	10177.3	32643.4	72344.4	143621	333247	352115	351914	325779	297477	251407	211952	230419	257869	299811	337274	417116	573835	723063	491130	611681	713683	760245	787708	807250	827514	848026	891047	909854	928369	948055	966316	990333	1.01082e+06	1.05063e+06	1090520	1.14583e+06	1.20691e+06	1.23932e+06	1.28796e+06	1.33952e+06	1.38554e+06	1.44187e+06	1.48267e+06
USSR	0	0	0	0	151.502	1948.22	5151.03	14010.2	15708.5	28700.8	31569.4	34567.7	37721.9	40926	44184.5	45291	46472	49927.2	53435.2	56615.9	59761.5	84279.6	119043	124754	122057	153771	188494	219991	238271	263054	288579	314940	342784	368061	393971	420610	448100	476514	503166	534777	570109	653017	702043	796627	868213	994627	1.13988e+06	1.29517e+06	1.58328e+06
N.Africa_M.East	0	0	99.7536	1382.59	6576.29	36404.1	134666	166310	181021	227071	277689	299276	323944	326396	295344	267323	242548	244450	249073	271659	266187	222117	231330	228480	192830	197540	243783	230754	233084	235828	238563	241284	243992	246681	249350	251996	254614	257201	284327	286630	299597	311893	324120	336256	349045	369306	389351	404740	407844
Tropical Africa	0	0	0	0	0	638.967	2791.18	12264.7	18451.2	28041.3	42946	48247.9	54602	62279.4	71625.3	83067.7	97224	114827	136926	155058	173722	193247	213491	240050	268960	291450	336066	388096	386679	389063	391687	394565	397714	401148	404893	408982	413450	418337	430733	436505	448574	461931	477174	494165	513474	541126	566393	599827	639354
China	0	0	6.93714	308.218	1255.58	4767.78	13409.2	30346.3	61779.7	121033	235844	213357	182773	93901.6	133079	170154	235600	201823	165150	202188	194308	477308	560871	444054	405987	524941	575474	604469	630736	659092	671742	677645	688829	695949	704802	723300	745513	766414	794804	814752	819267	816119	812871	808100	798912	794763	810237	826617	837622
South Asia	0	0	0	14407.4	25813.7	46250.7	82436.9	147704	264641	474157	849534	810927	772313	734026	696311	659392	623426	588550	554869	522448	491331	461555	433132	406063	380335	355929	332824	369802	397222	426746	458536	492759	529600	569261	611942	657880	707318	760524	807247	858325	914081	974861	1041057	1045882	1050926	1056800	1062752	1068691	1064840
SE Asia	0	0	0	1837.68	2839.21	4979.95	9795.34	28695.3	39911.4	56354.4	87903.1	91905.5	95814.1	97260.8	98687	100133	101641	104433	107217	111430	115492	122013	128806	123020	138775	151086	180244	204863	210895	217065	223490	230180	237145	246197	255612	265396	275554	286090	290926	298493	304513	319098	324079	344774	364047	390429	420799	468829	522206
Pacific Dev.	0	0	0	0	0	0	44.3971	206.462	290.948	444.42	583.34	815.708	1096.41	1647.27	2176.6	3154.74	4088.19	5718	6968.4	8662.08	8676.4	8975.15	7311.8	8017.62	9737.45	12183.8	15766.4	22803.4	24482.9	23981.7	23478	22971.9	22463.7	21774.8	21088	20404.1	19795.3	19195.4	17708.2	16193.9	14727.9	13446.9	13033.7	14668	17913.1	27912.5	33048.5	49607.2	73965.1
Total	0	0	106.691	18037.3	38869.7	101844	269468	469998	708921	1.14415e+06	1.93502e+06	1.93145e+06	1.90522e+06	1.77234e+06	1.7344e+06	1.68115e+06	1.67022e+06	1.65381e+06	1.6519e+06	1.76356e+06	1.79773e+06	2.15359e+06	2.45111e+06	2.49701e+06	2.22587e+06	2.56348e+06	2.68216e+06	2.9e+06	3.01655e+06	3.13855e+06	3.24988e+06	3.35907e+06	3.50164e+06	3.61951e+06	3.74471e+06	3.88812e+06	4.04153e+06	4.21891e+06	4.4079e+06	4.60355e+06	4.84586e+06	5.18647e+06	5.5219e+06	5.89936e+06	6.17225e+06	6.79847e+06	7.39113e+06	7.96028e+06	8.7553e+06
check	#DIV/0!	#DIV/0!	1	1	1	1	1	1	1	1	1	1	1	1	1	1	1	1	1	1	1	1	1	1	1	1	1	1	1	1	1	1	1	1	1	1	1	1	1	1	1	1	1	1	1	1	1	1	1
in Mha	-10000	-9000	-8000	-7000	-6000	-5000	-4000	-3000	-2000	-1000	0	100	200	300	400	500	600	700	800	900	1000	1100	1200	1300	1400	1500	1600	1700	1710	1720	1730	1740	1750	1760	1770	1780	1790	1800	1810	1820	1830	1840	1850	1860	1870	1880	1890	1900	1910
North America	0	0	0	0	0	0	0	0	0.0285859	0.212738	0.424982	0.44522	0.466419	0.488632	0.511899	0.536275	0.561811	0.588564	0.612447	0.69136	0.770688	0.835904	0.930937	1.01448	1.1344	1.24708	0.589623	0.767993	1.06164	1.38027	1.75483	2.15659	2.62323	3.17103	3.83783	4.7267	5.82657	8.28278	11.1625	15.2291	21.4527	30.6953	42.2416	60.7685	69.9853	104.415	130.576	149.618	176.286
Latin America	0	0	0	0	0.0277573	0.318058	1.09959	3.78177	5.44875	6.26045	7.14554	7.57875	8.0378	8.52419	9.03976	9.58621	10.1654	10.7775	11.4266	12.8777	14.3276	15.8626	17.3982	18.9362	20.4717	25.2431	8.99333	9.12953	9.68511	10.2663	10.8748	11.5129	12.183	12.8878	13.6307	14.4229	15.2601	16.1477	15.6546	15.4947	16.9941	18.332	19.8199	21.1879	22.1915	23.9833	27.7369	30.8754	38.0655
Europe	0	0	0	0.0101424	0.195586	0.367349	1.01773	3.26434	7.23444	14.3621	33.3247	35.2115	35.1914	32.5779	29.7477	25.1407	21.1952	23.0419	25.7869	29.9811	33.7274	41.7116	57.3835	72.3063	49.113	61.1681	71.3683	76.0245	78.7708	80.725	82.7514	84.8026	89.1047	90.9854	92.8369	94.8055	96.6316	99.0333	101.082	105.063	109.052	114.583	120.691	123.932	128.796	133.952	138.554	144.187	148.267
USSR	0	0	0	0	0.0151502	0.194822	0.515103	1.40102	1.57085	2.87008	3.15694	3.45677	3.77219	4.0926	4.41845	4.5291	4.6472	4.99272	5.34352	5.66159	5.97615	8.42796	11.9043	12.4754	12.2057	15.3771	18.8494	21.9991	23.8271	26.3054	28.8579	31.494	34.2784	36.8061	39.3971	42.061	44.81	47.6514	50.3166	53.4777	57.0109	65.3017	70.2043	79.6627	86.8213	99.4627	113.988	129.517	158.328
N.Africa_M.East	0	0	0.00997536	0.138259	0.657629	3.64041	13.4666	16.631	18.1021	22.7071	27.7689	29.9276	32.3944	32.6396	29.5344	26.7323	24.2548	24.4449	24.9073	27.1659	26.6187	22.2117	23.133	22.848	19.283	19.754	24.3783	23.0754	23.3084	23.5828	23.8563	24.1284	24.3992	24.6681	24.935	25.1996	25.4614	25.7201	28.4327	28.663	29.9597	31.1893	32.412	33.6256	34.9045	36.9306	38.9351	40.474	40.7844
Tropical Africa	0	0	0	0	0	0.0638967	0.279118	1.22647	1.84512	2.80413	4.2946	4.82479	5.4602	6.22794	7.16253	8.30677	9.7224	11.4827	13.6926	15.5058	17.3722	19.3247	21.3491	24.005	26.896	29.145	33.6066	38.8096	38.6679	38.9063	39.1687	39.4565	39.7714	40.1148	40.4893	40.8982	41.345	41.8337	43.0733	43.6505	44.8574	46.1931	47.7174	49.4165	51.3474	54.1126	56.6393	59.9827	63.9354
China	0	0	0.000693714	0.0308218	0.125558	0.476778	1.34092	3.03463	6.17797	12.1033	23.5844	21.3357	18.2773	9.39016	13.3079	17.0154	23.56	20.1823	16.515	20.2188	19.4308	47.7308	56.0871	44.4054	40.5987	52.4941	57.5474	60.4469	63.0736	65.9092	67.1742	67.7645	68.8829	69.5949	70.4802	72.33	74.5513	76.6414	79.4804	81.4752	81.9267	81.6119	81.2871	80.81	79.8912	79.4763	81.0237	82.6617	83.7622
South Asia	0	0	0	1.44074	2.58137	4.62507	8.24369	14.7704	26.4641	47.4157	84.9534	81.0927	77.2313	73.4026	69.6311	65.9392	62.3426	58.855	55.4869	52.2448	49.1331	46.1555	43.3132	40.6063	38.0335	35.5929	33.2824	36.9802	39.7222	42.6746	45.8536	49.2759	52.96	56.9261	61.1942	65.788	70.7318	76.0524	80.7247	85.8325	91.4081	97.4861	104.106	104.588	105.093	105.68	106.275	106.869	106.484
SE Asia	0	0	0	0.183768	0.283921	0.497995	0.979534	2.86953	3.99114	5.63544	8.79031	9.19055	9.58141	9.72608	9.8687	10.0133	10.1641	10.4433	10.7217	11.143	11.5492	12.2013	12.8806	12.302	13.8775	15.1086	18.0244	20.4863	21.0895	21.7065	22.349	23.018	23.7145	24.6197	25.5612	26.5396	27.5554	28.609	29.0926	29.8493	30.4513	31.9098	32.4079	34.4774	36.4047	39.0429	42.0799	46.8829	52.2206
Pacific Dev.	0	0	0	0	0	0	0.00443971	0.0206462	0.0290948	0.044442	0.058334	0.0815708	0.109641	0.164727	0.21766	0.315474	0.408819	0.5718	0.69684	0.866208	0.86764	0.897515	0.73118	0.801762	0.973745	1.21838	1.57664	2.28034	2.44829	2.39817	2.3478	2.29719	2.24637	2.17748	2.1088	2.04041	1.97953	1.91954	1.77082	1.61939	1.47279	1.34469	1.30337	1.4668	1.79131	2.79125	3.30485	4.96072	7.39651
Total	0	0	0.0106691	1.80373	3.88697	10.1844	26.9468	46.9998	70.8921	114.415	193.502	193.145	190.522	177.234	173.44	168.115	167.022	165.381	165.19	176.356	179.773	215.359	245.111	249.701	222.587	256.348	268.216	290	301.655	313.855	324.988	335.907	350.164	361.951	374.471	388.812	404.153	421.891	440.79	460.355	484.586	518.647	552.19	589.936	617.225	679.847	739.113	796.028	875.53
[truncated: 25 more columns]

[truncated: 12 more sheets: total_rice, total_irrigated, grazing, pasture, rangeland, total population, total rural pop, total urban pop, popdens, built-up area, check, Sheet1]
